# Supplementary material for: Pro-inflammatory secretome from intestinal epithelium recruits regulatory T cells for barrier defence
Source: Research Square preprint supplement (doi:10.21203/rs.3.rs-5431057/v1), 2025-05-12
Supplement: Supplementary file 1 [file 08f69d70e5ab129c3428bdfa.xlsx]

## Sheet: Legend
Table 8: A. Baseline patient characteristics.

## Sheet: A. Patient characteristics
	Healthy controls (n = 4)	Patients with ulcerative colitis (n = 6)
Age, mean ± SD	42.5 ± 13.8	33.8 ± 8.7
Female gender, n (%)	3 (75%)	4 (66,7%)
Ulcerative colitis, n (%)	0 (0%)	6 (100%)
UC medication
Mesalazine	0 (0%)	3 (50%)
Budesonide	0 (0%)	1 (16,7%)
Infliximab	0 (0%)	1 (16,7%)
Ustekinumab	0 (0%)	1 (16,7%)
Vedolizumab	0 (0%)	1 (16,7%)
