# Supplementary material for: Pro-inflammatory secretome from intestinal epithelium recruits regulatory T cells for barrier defence
Source: Research Square preprint supplement (doi:10.21203/rs.3.rs-5431057/v1), 2025-05-12
Supplement: Supplementary file 2 [file 4f1294a085114f4d0a57c748.xlsx]

## Sheet: Legend
Table 4: A-B. Secretome analysis of intestinal epithelial cells by proteome array. Colonoids were derived from Wildtype (Wt) and IκBα IEC KO mice treated with 3% DSS (colitis) or left untreated (ut) and cultured for two days. n = 4 mice per group, pooled. A. Summary of secretome array data from B. Log2 scale is shown. In bold: known NF-κB target genes. Values used for Fig. 4g. B. Mean pixel inten…

## Sheet: A. Summary of secretome data
	Wt - untreated	Wt - colitis	IκBα IEC KO - untreated	IκBα IEC KO - colitis
BAFF/BLyS/TNFSF13B	-3.32	-2.64	-3.32	-3.32193
CCL5/RANTES	-3.32	2.47	1.09	1.22319
CCL21/6Ckine	-3.32	0.9	-0.43	-3.32193
CCL22/MDC	-3.32	0.82	0.92	0.0995412
CD160	-3.32	-0.09	-3.32	-3.32193
Chitinase 3-like 1	-3.32	1.45	0.96	-3.32193
Complement Factor D	-3.32	0.79	0.64	-3.32193
C-Reactive Protein/CRP	-3.32	-3.32	-3.32	-3.32193
CXCL2/MIP-2	-3.32	1.82	1.03	-3.32193
CXCL9/MIG	-3.32	-3.32	-3.32	-3.32193
CXCL11/I-TAC	-3.32	-0.36	-0.36	-3.32193
Endoglin/CD105	-3.32	0.78	1.46	-0.00690898
FGF acidic	-3.32	-3.32	-3.22	-3.32193
FGF-21	-3.32	1.16	0.18	-3.32193
G-CSF	-3.32	0.63	-3.32	-1.24059
GM-CSF	-3.32	-3.32	-3.32	-3.32193
IGFBP-5	-3.32	0.18	-3.32	-3.32193
IGFBP-6	-3.32	2.02	0.36	-3.32193
IL-1β/IL-1F2	-3.32	1.92	-3.32	-0.546561
IL-2	-3.32	-3.32	-3.32	-3.32193
IL-3	-3.32	-3.32	-3.32	-3.32193
IL-10	-3.32	-3.32	-3.32	-3.32193
IL-12 p40	-3.32	1.38	-1.34	0.918049
IL-17A	-3.32	-1.93	-3.32	-3.32193
IL-22	-3.32	0.26	-0.55	-3.32193
Leptin	-3.32	0.36	-3.32	-3.32193
MMP-3	-3.32	-2.22	-3.32	-3.32193
MMP-9	-3.32	0.58	-0.31	0.874962
Periostin/OSF-2	-3.32	-0.38	-0.7	-3.32193
RAGE	-3.32	0.7	1.34	-1.18696
Resistin	-3.32	0.54	-3.32	-3.32193
E-Selectin/CD62E	-3.32	-1.43	-3.32	-3.32193
WISP-1/CCN4	-3.32	0.59	1.26	-1.04688
Osteoprotegerin/TNFRSF11B	-2.58	4.13	1.1	1.89752
IFN-γ	-2	1.68	0.45	-0.631735
M-CSF	-1.81	1.46	-0.3	-3.32193
Flt-3 Ligand	-1.6	1.45	0.58	-0.195282
IL-6	-1.43	-3.12	-0.86	-0.857384
IL-15	-1.2	1.01	-3.32	-1.74205
P-Selectin/CD62P	-1.17	1.02	-2.85	-3.32193
Lipocalin-2/NGAL	-1.15	2.12	1.24	-3.32193
Chemerin	-1.07	0.49	-0.15	-3.32193
CCL2/JE/MCP-1	-0.96	1.73	0.45	-3.32193
Amphiregulin	-0.86	4.29	1.73	1.5545
IL-1α/IL-1F1	-0.84	1.86	1.42	-0.650476
LIF	-0.83	1.73	1.88	-3.32193
CCL20/MIP-3α	-0.73	2.35	-0.8	-2.35213
TIM-1/KIM-1/HAVCR	-0.68	1.27	1.4	-1.07815
CXCL1/KC	-0.66	3.92	1.81	-0.259931
TNF-α	-0.45	1.3	1.44	0.432993
IL-23	-0.42	1.8	0.2	0.501974
Complement Component C5/C5a	-0.36	1.53	0.69	-0.192896
Gas 6	-0.29	1.43	0.88	-2.15798
GDF-15	-0.16	2.48	0.95	-3.32193
DPPIV/CD26	-0.15	1.29	1.63	-3.32193
CXCL13/BLC/BCA-1	-0.13	1.29	1.4	0.368175
CD40/TNFRSF5	0.07	1.42	1.14	-0.129819
IL-4	0.14	0.67	-0.32	1.00714
IL-27 p28	0.14	1.92	0.82	0.691718
CX3CL1/Fractalkine	0.34	3.19	1.96	0.87913
CXCL16	0.37	3.31	1.9	1.00946
C1q R1/CD93	0.49	1.52	1.07	-3.32193
CCL3/CCL4/MIP-1α/β	0.5	1.18	1.63	-0.206672
IGFBP-3	0.5	2.19	1.13	-3.32193
LIX	0.57	2.59	1.48	0.325922
HGF	0.63	1.36	1.4	-2.34141
IL-13	0.69	1.96	1.47	0.550744
Myeloperoxidase	0.69	1.75	1.85	1.04723
IL-11	0.71	2.01	1.35	-3.32193
PD-ECGF/Thymidine phosphorylase	0.71	1.58	1.56	0.536469
Thrombopoietin	0.76	0.66	1.59	-3.32193
Pentraxin 3/TSG-14	0.79	1.6	1.4	0.594461
Angiopoietin-like 3	0.84	2.09	1.45	0.472969
DKK-1	0.97	1.96	1.06	-1.13978
IL-1ra/IL-1F3	0.97	4.47	1.24	0.978003
CCL19/MIP-3β	1.02	2.14	1.57	-0.79109
Angiopoietin-1	1.03	2.68	1.43	-1.47169
CXCL10/IP-10	1.03	2.17	1.41	-3.32193
IL-5	1.09	0.93	-0.5	-3.32193
CCL11/Eotaxin	1.1	1.88	1.12	0.0501683
Angiopoietin-2	1.11	3.04	1.43	-3.32193
CCL17/TARC	1.23	2.98	1.59	0.510815
CCL6/C10	1.32	4.44	2.58	1.55063
ICAM-1/CD54	1.44	2.75	1.51	1.63326
Pref-1/DLK-1/FA1	1.44	1.56	1.2	-0.99309
IL-7	1.6	2.44	2.31	-0.210155
Osteopontin (OPN)	1.62	2.86	2.67	2.0834
Cystatin C	1.64	3.81	2.43	1.84652
Serpin F1/PEDF	1.66	1.88	1.16	-0.569019
IGFBP-2	1.8	2.74	2.49	0.411156
CD14	1.82	2.84	2.43	2.10402
RBP4	1.86	3.94	2.79	1.82924
VCAM-1/CD106	1.86	4.03	3.35	1.77176
VEGF	1.92	3.8	3.08	1.59477
Proprotein Convertase 9/PCSK9	2.03	2.82	2.87	1.76733
Serpin E1/PAI-1	2.04	2.12	2.44	-0.134737
IGFBP-1	2.26	3.62	3.23	1.53857
Proliferin	2.3	1.88	2.33	0.874411
Coagulation Factor III/Tissue Factor	2.41	5.28	2.74	2.59822
Pentraxin 2/SAP	2.78	2.98	3.07	0.782815
PDGF-BB	2.94	2.45	3.32	2.86685
CCL12/MCP-5	3.04	3.4	3.07	2.21343
Adiponectin/Acrp30	3.29	4.52	4.29	3.18188
LDL R	3.41	4.7	4.01	2.64109
MMP-2	3.55	3.36	3.46	2.06458
EGF	3.98	4.14	3.93	3.29173
Reg3G	3.98	6.54	4.42	4.57975
IL-28A/B	4.26	4.61	3.97	3.40079
Fetuin A/AHSG	4.38	5.19	4.77	2.98884
IL-33	4.69	4.75	4.97	4.5728
Endostatin	5.26	5.68	5.23	-3.32193

## Sheet: B. Raw secretome data
Secretome analysis
		Raw chemiluminescence data					Averaged reference spot normalized					Reference averaged for each membrane					Raw values divided by reference					Blank value subtracted from each value					Control medium value subtracted from each value				Average of duplicate				Negative values set to zero
Spot labels	Name	IκBα IEC KO - colitis	IκBα IEC KO - ut	Wt - colitis	Wt - ut	control medium	IκBα IEC KO - colitis	IκBα IEC KO - ut	Wt - colitis	Wt - ut	control medium	IκBα IEC KO - colitis	IκBα IEC KO - ut	Wt - colitis	Wt - ut	control medium	IκBα IEC KO - colitis	IκBα IEC KO - ut	Wt - colitis	Wt - ut	control medium	IκBα IEC KO - colitis	IκBα IEC KO - ut	Wt - colitis	Wt - ut	control medium	IκBα IEC KO - colitis	IκBα IEC KO - ut	Wt - colitis	Wt - ut	IκBα IEC KO - colitis	IκBα IEC KO - ut	Wt - colitis	Wt - ut	IκBα IEC KO - colitis	IκBα IEC KO - ut	Wt - colitis	Wt - ut
A1	Reference Spot	238.064	230.517	221.719	244.202	251.604	0.940878	0.948942	0.880537	0.974297	0.988444	0.932258	0.959309	0.94411	0.964376	0.970364
A2	Reference Spot	241.475	253.132	227.066	252.37	252.178
A3		137.198	151.192	149.665	137.037	87.793											147.167	157.605	160.54	142.85	91.5169	19.456	33.7107	32.7624	18.333	6.25033	13.2057	27.4604	26.5121	12.0826	9.07491	19.6219	22.9477	9.78829	9.07491	19.6219	22.9477	9.78829
A4		124.952	131.477	138.475	127.959	83.117											134.032	137.054	148.537	133.387	86.6425	6.32014	13.1595	20.7593	8.86992	1.37599	4.94415	11.7835	19.3833	7.49393
A5		123.624	123.762	138.281	121.69	84.511											132.607	129.012	148.329	126.852	88.0957	4.89564	5.11722	20.5512	2.33501	2.82912	2.06652	2.2881	17.7221	-0.494105	2.93731	3.32062	19.5877	0.549875	2.93731	3.32062	19.5877	0.549875
A6		124.062	124.523	140.574	122.473	83.291											133.077	129.805	150.789	127.668	86.8239	5.36547	5.9105	23.0108	3.15123	1.55737	3.8081	4.35313	21.4534	1.59385
A7		121.37	123.853	129.281	123.035	84.571											130.189	129.106	138.675	128.254	88.1582	2.47786	5.21208	10.8972	3.73706	2.89166	-0.413808	2.32042	8.00554	0.8454	0.360561	2.6936	6.4297	2.03584	0.360561	2.6936	6.4297	2.03584
A8		121.636	123.357	125.165	124.107	83.359											130.475	128.589	134.26	129.371	86.8948	2.76318	4.69504	6.48211	4.85453	1.62825	1.13493	3.06679	4.85386	3.22628
A9		121.417	123.857	128.481	122.665	84.127											130.24	129.111	137.817	127.868	87.6954	2.52827	5.21625	10.0391	3.35137	2.42883	0.0994403	2.78742	7.61024	0.922539	-0.185357	2.70299	8.2061	2.16041	0	2.70299	8.2061	2.16041
A10		121.058	123.872	129.764	125.217	84.304											129.855	129.126	139.193	130.528	87.8799	2.14318	5.23189	11.4153	6.01162	2.61334	-0.470154	2.61855	8.80196	3.39828
A11		122.347	122.878	126.169	124.138	84.416											131.237	128.09	135.337	129.403	87.9966	3.52585	4.19573	7.55907	4.88685	2.73009	0.79576	1.46564	4.82898	2.15676	1.38796	2.74103	4.26539	1.79504	1.38796	2.74103	4.26539	1.79504
A12		122.182	124.019	123.849	122.138	83.11											131.06	129.279	132.848	127.319	86.6352	3.34886	5.38512	5.07049	2.80202	1.36869	1.98017	4.01643	3.70179	1.43332
A13		119.091	119.002	121.198	120.031	84.864											127.745	124.05	130.005	125.122	88.4636	0.0332526	0.15532	2.22685	0.605644	3.19709	-3.16384	-3.04177	-0.970239	-2.59145	-2.41353	-2.01708	0.160866	-1.76481	0	0	0.160866	0
A14		118.421	118.839	121.238	119.488	82.735											127.026	123.88	130.048	124.556	86.2443	-0.685433	-0.0145938	2.26976	0.0396118	0.977787	-1.66322	-0.992381	1.29197	-0.938175
A15		120.69	122.973	124.419	122.81	85.154											129.46	128.189	133.46	128.019	88.7659	1.74844	4.29476	5.6819	3.50252	3.49939	-1.75095	0.795364	2.18251	0.00312725	-0.237587	2.09786	2.8592	1.40309	0	2.09786	2.8592	1.40309
A16		122.467	124.397	124.636	124.421	84.079											131.366	129.673	133.693	129.699	87.6453	3.65457	5.77916	5.91467	5.18185	2.37879	1.27577	3.40036	3.53588	2.80306
A17		121.333	122.581	124.126	122.452	85.556											130.15	127.78	133.146	127.646	89.185	2.43817	3.88613	5.36761	3.12933	3.91844	-1.48028	-0.0323149	1.44917	-0.789109	-0.779721	1.36296	3.31464	0.513911	0	1.36296	3.31464	0.513911
A18		121.302	123.882	126.267	123.576	84.18											130.116	129.137	135.442	128.818	87.7506	2.40491	5.24231	7.66419	4.30101	2.48408	-0.0791643	2.75823	5.18011	1.81693
A19		121.926	124.132	124.335	122.428	84.114											130.786	129.397	133.37	127.621	87.6818	3.07426	5.50292	5.5918	3.10432	2.41528	0.658978	3.08764	3.17652	0.689037	0.866534	3.10536	2.25832	1.41195	0.866534	3.10536	2.25832	1.41195
A20		121.589	123.421	121.899	123.07	83.369											130.424	128.656	130.757	128.29	86.9052	2.71277	4.76176	2.97879	3.77355	1.63868	1.07409	3.12308	1.34011	2.13487
A21		121.211	120.955	122.523	119.756	83.465											130.019	126.085	131.426	124.836	87.0053	2.3073	2.19116	3.64813	0.318979	1.73875	0.568551	0.452409	1.90938	-1.41977	2.33463	2.13383	5.536	-2.24797	2.33463	2.13383	5.536	0
A22		127.946	127.723	132.727	121.709	87.007											137.243	133.141	142.372	126.871	90.6975	9.5317	9.24623	14.5936	2.35482	5.43099	4.10071	3.81524	9.16261	-3.07617
A23	Reference Spot	252.424	251.38	254.012	250.289	248.327	0.98716	0.992426	1.00348	0.99379	0.973005
A24	Reference Spot	248.312	252.027	255	253.81	245.229
B3		125.512	128.829	138.231	125.694	84.999											134.632	134.293	148.276	131.025	88.6044	6.92083	10.3991	20.4975	6.50885	3.33782	3.58302	7.06133	17.1597	3.17103	2.92944	5.97461	21.6657	2.50336	2.92944	5.97461	21.6657	2.50336
B4		124.721	127.184	147.06	124.853	85.439											133.784	132.579	157.746	130.149	89.063	6.07235	8.68437	29.9681	5.63218	3.79648	2.27587	4.88789	26.1716	1.8357
B5		122.473	122.006	124.11	123.618	84.832											131.372	127.181	133.128	128.861	88.4303	3.661	3.28674	5.35045	4.34479	3.16373	0.497271	0.123005	2.18672	1.18106	1.03539	2.17917	3.68755	2.14894	1.03539	2.17917	3.68755	2.14894
B6		121.661	124.083	125.093	123.607	82.964											130.501	129.346	134.183	128.85	86.483	2.79	5.45184	6.40488	4.33333	1.2165	1.5735	4.23534	5.18838	3.11683
B7		124.742	126.847	129.419	129.058	82.691											133.806	132.227	138.823	134.532	86.1985	6.09488	8.33308	11.0452	10.0155	0.93192	5.16296	7.40116	10.1133	9.08362	4.63778	8.39614	10.5503	8.19913	4.63778	8.39614	10.5503	8.19913
B8		124.548	129.564	131.019	128.169	83.499											133.598	135.06	140.539	133.605	87.0407	5.88678	11.1653	12.7615	9.08883	1.77419	4.11259	9.39113	10.9873	7.31464
B9		122.138	123.432	128.083	122.731	84.059											131.013	128.668	137.39	127.937	87.6245	3.30166	4.77323	9.61215	3.42017	2.35795	0.943716	2.41528	7.2542	1.06222	1.42485	3.00946	7.9134	2.35221	1.42485	3.00946	7.9134	2.35221
B10		122.349	123.866	128.626	124.5	83.353											131.239	129.12	137.973	129.781	86.8885	3.52799	5.22563	10.1946	5.2642	1.622	1.90599	3.60363	8.57261	3.6422
B11		120.8	123.291	126.293	124.285	83.69											129.578	128.521	135.47	129.557	87.2398	1.86644	4.62624	7.69208	5.04008	1.97329	-0.106858	2.65295	5.71878	3.06679	0.577907	2.97193	4.39391	2.02333	0.577907	2.97193	4.39391	2.02333
B12		121.448	123.256	123.194	121.636	83.043											130.273	128.484	132.146	126.795	86.5654	2.56152	4.58976	4.36789	2.27872	1.29885	1.26267	3.29091	3.06904	0.979872
B13		121.705	121.238	126.401	121.579	85.685											130.549	126.38	135.586	126.736	89.3195	2.8372	2.48616	7.80793	2.2193	4.05292	-1.21572	-1.56675	3.75501	-1.83361	0.195857	0.574893	5.10598	0.601996	0.195857	0.574893	5.10598	0.601996
B14		121.163	122.081	125.746	122.986	82.419											129.967	127.259	134.883	128.203	85.9149	2.25581	3.36492	7.10533	3.68598	0.648383	1.60743	2.71654	6.45695	3.0376
B15		120.862	121.295	123.122	122.401	84.104											129.644	126.44	132.069	127.593	87.6714	1.93294	2.54558	4.29066	3.07617	2.40485	-0.471913	0.140726	1.8858	0.671316	-0.450448	0.744807	1.86436	0.0724479	0	0.744807	1.86436	0.0724479
B16		120.248	121.781	122.428	120.579	83.431											128.986	126.947	131.324	125.694	86.9699	1.27433	3.0522	3.54623	1.17689	1.70331	-0.428983	1.34889	1.84292	-0.52642
B17		121.298	121.669	122.023	120.979	84.238											130.112	126.83	130.89	126.111	87.8111	2.40062	2.93544	3.1118	1.59385	2.54454	-0.143915	0.390906	0.567262	-0.950684	1.07143	1.8972	1.76759	-0.17669	1.07143	1.8972	1.76759	0
B18		123.324	124.312	124.021	122.217	83.991											132.285	129.585	133.033	127.401	87.5536	4.57384	5.69055	5.25498	2.88437	2.28706	2.28678	3.40349	2.96792	0.597305
B19		124.452	125.32	127.574	125.351	83.181											133.495	130.636	136.844	130.668	86.7092	5.78381	6.74131	9.06616	6.1513	1.4427	4.3411	5.2986	7.62346	4.7086	4.29906	5.40284	7.17916	3.5291	4.29906	5.40284	7.17916	3.5291
B20		124.808	125.967	127.18	123.535	83.628											133.877	131.31	136.421	128.775	87.1752	6.16568	7.41575	8.64353	4.25827	1.90866	4.25701	5.50709	6.73487	2.34961
B21		122.304	122.159	124.94	121.198	85.516											131.191	127.341	134.019	126.339	89.1433	3.47972	3.44623	6.24076	1.82214	3.87675	-0.397023	-0.430518	2.36402	-2.0546	0.913946	2.2068	2.68384	1.05284	0.913946	2.2068	2.68384	1.05284
B22		123.76	126.202	124.548	126.143	84.499											132.753	131.555	133.598	131.494	88.0832	5.04152	7.66072	5.82028	6.97689	2.81661	2.22491	4.84411	3.00367	4.16028
C3		120.31	121.62	122.647	123.572	84.209											129.052	126.779	131.559	128.813	87.7809	1.34083	2.88437	3.78114	4.29684	2.51431	-1.17348	0.370058	1.26683	1.78253	-1.79464	-0.184508	0.942265	-0.929836	0	0	0.942265	0
C4		120.18	121.614	123.07	119.426	85.267											128.913	126.772	132.013	124.492	88.8837	1.20138	2.87811	4.23488	-0.025018	3.61719	-2.4158	-0.739073	0.617695	-3.6422
C5		121.023	121.107	122.419	122.957	83.77											129.817	126.244	131.315	128.172	87.3232	2.10564	2.34961	3.53658	3.65575	2.05669	0.048953	0.292919	1.47989	1.59907	-0.760438	0.90169	1.39991	0.477948	0	0.90169	1.39991	0.477948
C6		120.13	122.909	122.886	121.44	84.404											128.859	128.122	131.815	126.591	87.9841	1.14775	4.22804	4.03751	2.07441	2.71758	-1.56983	1.51046	1.31993	-0.643171
C7		120.603	123.19	123.822	121.39	83.765											129.367	128.415	132.819	126.539	87.318	1.65512	4.52096	5.04152	2.02229	2.05148	-0.396354	2.46948	2.99005	-0.0291877	-0.894347	1.93994	2.73555	-0.0839145	0	1.93994	2.73555	0
C8		119.829	122.333	123.502	121.444	83.924											128.536	127.522	132.476	126.595	87.4838	0.824879	3.62761	4.69827	2.07858	2.21722	-1.39234	1.41039	2.48105	-0.138641
C9		124.331	126.591	155.612	124.727	83.704											133.365	131.961	166.919	130.017	87.2544	5.65402	8.06622	39.1415	5.50083	1.98789	3.66613	6.07833	37.1536	3.51294	6.0554	6.68606	38.9723	5.29652	6.0554	6.68606	38.9723	5.29652
C10		128.711	127.68	158.928	128.072	83.627											138.064	133.096	170.476	133.504	87.1742	10.3523	9.20141	42.6985	8.98772	1.90762	8.44466	7.29379	40.7909	7.08009
C11		122.674	123.068	125.855	123.07	83.673											131.588	128.288	135	128.29	87.2221	3.87661	4.39379	7.22225	3.77355	1.95557	1.92104	2.43821	5.26668	1.81797	0.874848	1.61366	2.88341	0.779206	0.874848	1.61366	2.88341	0.779206
C12		120.667	121.428	121.355	121.019	83.615											129.435	126.579	130.173	126.152	87.1617	1.72377	2.68422	2.39526	1.63555	1.89511	-0.171341	0.789109	0.500147	-0.259562
C13		119.636	121.748	122.764	120.343	84.281											128.329	126.912	131.685	125.448	87.8559	0.617855	3.0178	3.90664	0.930878	2.58936	-1.97151	0.428433	1.31728	-1.65848	-1.18099	1.55424	1.72754	-0.453972	0	1.55424	1.72754	0
C14		119.798	122.558	122.217	121.304	82.931											128.503	127.756	131.098	126.449	86.4486	0.791627	3.86215	3.3199	1.93264	1.1821	-0.390474	2.68005	2.1378	0.75054
C15		118.638	118.876	119.469	119.45	83.895											127.259	123.918	128.15	124.517	87.4535	-0.452665	0.0239756	0.372215	0	2.18699	-2.63965	-2.16301	-1.81478	-2.18699	-3.21393	-2.56643	-2.99511	-3.42173	0	0	0	0
C16		119.161	119.742	118.862	118.721	85.535											127.82	124.821	127.499	123.757	89.1631	0.108339	0.926708	-0.278893	-0.759922	3.89655	-3.78821	-2.96984	-4.17545	-4.65647
C17		121.374	123.163	127.851	121.876	82.622											130.194	128.387	137.141	127.046	86.1265	2.48215	4.49282	9.36329	2.5289	0.859994	1.62215	3.63282	8.5033	1.66891	1.83927	3.89968	9.14465	1.26393	1.83927	3.89968	9.14465	1.26393
C18		122.496	124.413	129.764	121.837	83.36											131.397	129.69	139.193	127.005	86.8958	3.68568	5.79584	11.4153	2.48825	1.6293	2.05638	4.16654	9.786	0.858951
C19		122.273	124.043	135.919	122.025	84.306											131.158	129.304	145.796	127.201	87.882	3.44647	5.41014	18.0175	2.68422	2.61542	0.831049	2.79472	15.4021	0.0687995	0.835128	3.49991	15.1026	0.633789	0.835128	3.49991	15.1026	0.633789
C20		122.267	125.382	135.347	123.095	84.292											131.151	130.7	145.182	128.316	87.8674	3.44004	6.80594	17.404	3.79961	2.60083	0.839207	4.20511	14.8032	1.19878
C21		120.977	123.335	124.318	120.574	84.069											129.768	128.566	133.352	125.688	87.6349	2.0563	4.67211	5.57357	1.17168	2.36837	-0.312072	2.30374	3.2052	-1.19669	-0.648251	2.04835	3.53514	-0.476384	0	2.04835	3.53514	0
C22		120.529	123.029	125.112	122.14	84.253											129.287	128.247	134.203	127.321	87.8267	1.57574	4.35313	6.42526	2.8041	2.56017	-0.98443	1.79296	3.86509	0.243925
D1		118.457	119.579	120.514	120.287	83.761											127.065	124.651	129.271	125.389	87.3138	-0.646817	0.756794	1.49315	0.872503	2.04731	-2.69412	-1.29051	-0.554157	-1.1748	-2.82859	-0.650989	-0.405445	-1.48909	0	0	0	0
D2		118.905	121.525	121.49	120.403	84.48											127.545	126.68	130.318	125.51	88.0633	-0.166263	2.78534	2.54007	0.993423	2.7968	-2.96307	-0.0114666	-0.256733	-1.80338
D3		119.24	123.457	125.196	123.105	83.336											127.905	128.694	134.293	128.327	86.8708	0.19308	4.79929	6.51537	3.81003	1.60428	-1.4112	3.19501	4.91109	2.20575	-1.30627	2.64982	4.50542	2.03897	0	2.64982	4.50542	2.03897
D4		119.94	122.93	124.944	123.304	83.855											128.655	128.144	134.023	128.534	87.4118	0.943945	4.24993	6.24505	4.01747	2.14529	-1.20135	2.10464	4.09976	1.87218
D5		119.651	121.727	122.008	120.153	85.026											128.345	126.89	130.874	125.249	88.6325	0.633945	2.99591	3.09571	0.732819	3.36596	-2.73202	-0.370058	-0.270253	-2.63314	-1.22315	0.78077	0.780055	-1.44062	0	0.78077	0.780055	0
D6		121.269	122.705	122.771	121.211	83.796											130.081	127.91	131.692	126.352	87.3503	2.36952	4.01539	3.91415	1.8357	2.08379	0.285726	1.9316	1.83036	-0.248095
D7		120.866	121.864	122.2	122.041	82.527											129.649	127.033	131.08	127.218	86.0275	1.93723	3.13872	3.30166	2.7009	0.760964	1.17627	2.37775	2.5407	1.93994	1.29072	2.64044	2.45027	0.913157	1.29072	2.64044	2.45027	0.913157
D8		121.093	122.382	122.045	120.085	82.541											129.892	127.573	130.913	125.179	86.0421	2.18073	3.67869	3.1354	0.661934	0.775558	1.40517	2.90313	2.35984	-0.113623
D9		121.527	123.153	129.138	121.638	83.851											130.358	128.377	138.522	126.797	87.4077	2.64626	4.48239	10.7438	2.28081	2.14112	0.50514	2.34127	8.60269	0.139684	2.01315	3.72143	9.92245	1.28843	2.01315	3.72143	9.92245	1.28843
D10		123.364	124.798	130.624	122.839	82.848											132.328	130.091	140.116	128.049	86.3621	4.61675	6.19717	12.3378	3.53275	1.09558	3.52117	5.10159	11.2422	2.43717
D11		123.649	126.155	134.118	123.965	84.222											132.634	131.506	143.864	129.223	87.7944	4.92246	7.61173	16.0857	4.70651	2.52786	2.3946	5.08387	13.5578	2.17865	3.59632	5.38356	13.9883	3.11161	3.59632	5.38356	13.9883	3.11161
D12		124.843	125.653	133.874	124.678	83.145											133.915	130.983	143.602	129.966	86.6717	6.20322	7.08843	15.8239	5.44975	1.40518	4.79804	5.68325	14.4188	4.04458
D13		122.496	123.217	123.901	123.694	84.544											131.397	128.443	132.904	128.941	88.1301	3.68568	4.54911	5.12626	4.42402	2.86352	0.822158	1.68559	2.26275	1.5605	0.453828	2.09005	3.89815	1.96079	0.453828	2.09005	3.89815	1.96079
D14		121.473	123.647	126.614	124.116	84.198											130.3	128.892	135.814	129.381	87.7694	2.58834	4.99734	8.0364	4.86392	2.50284	0.0854979	2.4945	5.53356	2.36107
D15		119.413	124.273	123.362	122.345	83.871											128.09	129.544	132.326	127.534	87.4285	0.378651	5.6499	4.5481	3.0178	2.16197	-1.78332	3.48793	2.38613	0.855824	-1.32462	3.0892	2.44527	0.900127	0	3.0892	2.44527	0.900127
D16		120.174	123.411	123.378	122.333	83.774											128.906	128.646	132.343	127.522	87.3274	1.19495	4.75133	4.56526	3.00529	2.06086	-0.865909	2.69048	2.5044	0.944429
D17		131.405	134.252	136.31	136.663	84.425											140.954	139.946	146.215	142.46	88.006	13.242	16.0522	18.437	17.9431	2.73947	10.5026	13.3127	15.6975	15.2036	9.79286	15.1948	17.6362	15.7697	9.79286	15.1948	17.6362	15.7697
D18		130.727	138.527	140.57	138.413	85.089											140.226	144.403	150.784	144.284	88.6982	12.5148	20.5085	23.0065	19.7673	3.43164	9.08314	17.0769	19.5749	16.3357
D19		120.973	125.262	123.529	121.843	83.972											129.763	130.575	132.505	127.011	87.5338	2.05201	6.68085	4.72723	2.4945	2.26726	-0.215248	4.41359	2.45998	0.227247	0.995223	2.74416	1.71337	-0.0703631	0.995223	2.74416	1.71337	0
D20		122.711	121.525	121.618	120.738	83.438											131.628	126.68	130.455	125.859	86.9771	3.9163	2.78534	2.67737	1.34263	1.71061	2.20569	1.07473	0.966766	-0.367973
D21		157.572	198.57	199.622	197.256	123.677											169.022	206.993	214.127	205.623	128.923	41.3105	83.0983	86.3495	81.1063	43.6564	-2.34594	39.4419	42.6931	37.4499	-2.4805	37.4728	51.3206	38.4454	0	37.4728	51.3206	38.4454
D22		159.324	196.853	217.711	201.227	125.738											170.901	205.203	233.531	209.762	131.071	43.1898	81.3085	105.753	85.2457	45.8048	-2.61505	35.5037	59.9481	39.4409
D23		128.915	147.793	158.337	143.452	84.234											138.283	154.062	169.843	149.537	87.8069	10.5711	30.1675	42.0645	25.0201	2.54037	8.03074	27.6272	39.5242	22.4797	7.93838	27.3452	36.4176	20.8546	7.93838	27.3452	36.4176	20.8546
D24		127.667	146.145	151.469	139.227	83.127											136.944	152.344	162.475	145.133	86.653	9.23243	28.4496	34.6975	20.6159	1.38641	7.84601	27.0632	33.3111	19.2295
E1		119.004	120.36	119.395	119.702	84.251											127.651	125.465	128.071	124.779	87.8246	-0.0600692	1.57092	0.292837	0.262689	2.55809	-2.61816	-0.987168	-2.26525	-2.2954	-2.0381	0.107369	-1.06412	-1.68715	0	0.107369	0	0
E2		118.829	121.167	120.378	119.576	82.958											127.464	126.306	129.125	124.648	86.4768	-0.247786	2.41215	1.34727	0.131344	1.21025	-1.45803	1.20191	0.137021	-1.0789
E3		120.849	122.45	123.868	120.977	85.267											129.63	127.644	132.869	126.108	88.8837	1.919	3.74957	5.09087	1.59177	3.61719	-1.69819	0.132387	1.47368	-2.02542	-0.852419	1.13311	2.24168	-0.834454	0	1.13311	2.24168	0
E4		120.322	122.205	123.196	121.097	83.102											129.065	127.389	132.148	126.234	86.6269	1.3537	3.49418	4.37004	1.71686	1.36035	-0.00665068	2.13383	3.00968	0.356506
E5		120.87	120.812	123.083	120.099	83.513											129.653	125.936	132.027	125.193	87.0553	1.94152	2.04209	4.24882	0.676528	1.78879	0.152736	0.253307	2.46004	-1.11226	0.873402	1.49326	2.72429	0.330967	0.873402	1.49326	2.72429	0.330967
E6		121.376	122.329	122.738	122.006	82.651											130.196	127.518	131.657	127.181	86.1568	2.48429	3.62344	3.87876	2.66442	0.890224	1.59407	2.73322	2.98853	1.77419
E7		120.779	122.145	123.037	121.293	82.621											129.555	127.326	131.977	126.438	86.1255	1.84391	3.43164	4.19948	1.92117	0.858951	0.984959	2.57268	3.34053	1.06222	0.22407	1.8383	2.70032	0.820382	0.22407	1.8383	2.70032	0.820382
E8		120.715	122.13	123.198	122.223	84.015											129.487	127.31	132.15	127.407	87.5786	1.77526	3.416	4.37218	2.89062	2.31208	-0.53682	1.10392	2.0601	0.578541
E9		121.068	120.11	121.376	119.424	83.545											129.865	125.205	130.196	124.49	87.0887	2.15391	1.31032	2.41779	-0.0271028	1.82214	0.331767	-0.511827	0.595642	-1.84925	0.423198	-1.2952	1.54628	-1.32231	0.423198	0	1.54628	0
E10		120.669	118.021	122.579	119.849	82.959											129.437	123.027	131.486	124.933	86.4778	1.72592	-0.867291	3.7082	0.415924	1.21129	0.51463	-2.07858	2.49691	-0.795364
E11		119.876	121.498	127.477	120.407	84.096											128.587	126.652	136.74	125.514	87.6631	0.875294	2.75719	8.96211	0.997593	2.39652	-1.52122	0.360676	6.5656	-1.39892	-0.119084	1.93681	5.58749	0.897521	0	1.93681	5.58749	0.897521
E12		121.467	123.469	124.63	123.76	83.043											130.293	128.706	133.686	129.009	86.5654	2.5819	4.81179	5.90824	4.49282	1.29885	1.28305	3.51294	4.60939	3.19396
E13		118.702	120.533	120.107	120.576	84.767											127.327	125.646	128.835	125.69	88.3625	-0.384014	1.75126	1.05657	1.17376	3.09598	-3.47999	-1.34472	-2.0394	-1.92222	-1.45254	-1.45	-2.4056	-2.34387	0	0	0	0
E14		121.835	119.665	118.777	119.101	84.101											130.688	124.741	127.408	124.153	87.6683	2.97664	0.846442	-0.370069	-0.363803	2.40173	0.574917	-1.55529	-2.7718	-2.76553
E15		119.975	122.211	122.886	122.676	82.941											128.693	127.395	131.815	127.879	86.4591	0.981488	3.50043	4.03751	3.36284	1.19252	-0.211036	2.30791	2.84499	2.17031	0.197317	2.63627	2.57273	1.5433	0.197317	2.63627	2.57273	1.5433
E16		121.68	123.812	123.322	122.444	83.912											130.522	129.064	132.283	127.638	87.4713	2.81038	5.16934	4.50519	3.121	2.20471	0.605671	2.96463	2.30048	0.916284
E17		124.19	122.533	126.099	121.791	83.086											133.214	127.73	135.262	126.957	86.6102	5.50277	3.83609	7.48398	2.4403	1.34367	4.1591	2.49242	6.14031	1.09662	3.10213	2.84006	6.73578	2.72175	3.10213	2.84006	6.73578	2.72175
E18		122.091	123.068	127.081	124.777	82.954											130.963	128.288	136.315	130.07	86.4726	3.25125	4.39379	8.53734	5.55295	1.20608	2.04517	3.18771	7.33126	4.34688
E19		121.952	122.847	124.831	121.988	84.222											130.814	128.058	133.902	127.162	87.7944	3.10215	4.16341	6.12384	2.64565	2.52786	0.574286	1.63555	3.59598	0.117793	0.6454	1.36921	3.21014	0.249659	0.6454	1.36921	3.21014	0.249659
E20		122.105	122.357	124.132	122.262	84.243											130.978	127.547	133.152	127.448	87.8163	3.26626	3.65263	5.37405	2.93128	2.54975	0.716513	1.10288	2.8243	0.381524
E21		124.064	129.764	132.076	125.694	84.567											133.079	135.268	141.673	131.025	88.154	5.36761	11.3738	13.8953	6.50885	2.88749	2.48012	8.48631	11.0078	3.62135	2.90507	9.37393	12.2785	4.78886	2.90507	9.37393	12.2785	4.78886
E22		124.178	130.769	133.767	127.236	83.869											133.201	136.316	143.487	132.633	87.4264	5.4899	12.4214	15.7092	8.11625	2.15989	3.33001	10.2615	13.5493	5.95637
E23		123.099	127.093	127.756	124.975	84.077											132.044	132.484	137.039	130.276	87.6433	4.33249	8.58951	9.26139	5.75935	2.37671	1.95578	6.2128	6.88468	3.38264	1.32975	5.62279	6.70005	3.47281	1.32975	5.62279	6.70005	3.47281
E24		122.13	126.165	127.61	125.352	84.281											131.005	131.516	136.883	130.669	87.8559	3.29308	7.62215	9.10478	6.15234	2.58936	0.703718	5.03279	6.51542	3.56298
F1		120.835	121.694	124.26	121.49	84.871											129.615	126.856	133.289	126.643	88.4709	1.90398	2.96151	5.51135	2.12653	3.20439	-1.30041	-0.242883	2.30696	-1.07786	-0.476095	2.1896	4.55685	1.41247	0	2.1896	4.55685	1.41247
F2		120.13	124.054	126.213	123.961	82.564											128.859	129.316	135.384	129.219	86.0661	1.14775	5.42161	7.60627	4.70234	0.799533	0.348218	4.62207	6.80673	3.90281
F3		119.541	120.287	122.651	121.434	84.459											128.227	125.389	131.563	126.585	88.0415	0.515952	1.49483	3.78543	2.06815	2.77491	-2.25896	-1.28009	1.01052	-0.706758	-1.65465	-0.624929	1.13375	-0.94026	0	0	1.13375	0
F4		119.591	120.436	121.804	119.878	83.351											128.281	125.544	130.655	124.963	86.8865	0.569585	1.65015	2.87689	0.446154	1.61992	-1.05033	0.0302301	1.25697	-1.17376
F5		120.872	120.915	125.134	121.448	84.498											129.655	126.044	134.227	126.599	88.0821	1.94367	2.14946	6.44886	2.08275	2.81557	-0.871899	-0.666104	3.63329	-0.732819	-0.348263	1.28269	4.06253	-0.0953811	0	1.28269	4.06253	0
F6		120.55	123.318	124.636	121.335	83.162											129.31	128.549	133.693	126.482	86.6894	1.59827	4.65439	5.91467	1.96496	1.4229	0.175372	3.23149	4.49177	0.542057
F7		121.101	123.36	125.008	121.508	83.471											129.901	128.592	134.092	126.662	87.0115	2.18931	4.69817	6.3137	2.14529	1.74501	0.444303	2.95317	4.5687	0.400288	0.63707	2.6837	3.63249	0.558735	0.63707	2.6837	3.63249	0.558735
F8		120.82	122.184	122.622	121.153	82.812											129.599	127.367	131.532	126.292	86.3246	1.88789	3.47229	3.75433	1.77524	1.05805	0.829837	2.41424	2.69627	0.717183
F9		121.5	120.128	123.2	120.145	83.509											130.329	125.223	132.152	125.241	87.0512	2.6173	1.32908	4.37433	0.724479	1.78462	0.832685	-0.455536	2.58971	-1.06014	0.68465	0.062545	3.78626	-0.266337	0.68465	0.062545	3.78626	0
F10		120.81	120.696	125.017	121.242	83.083											129.589	125.816	134.101	126.385	86.6071	1.87716	1.92117	6.32336	1.86801	1.34055	0.536616	0.580626	4.98281	0.527463
F11		122.597	123.223	142.742	123.021	83.57											131.505	128.45	153.114	128.239	87.1147	3.79402	4.55536	25.3363	3.72247	1.8482	1.94581	2.70716	23.4881	1.87426	1.96974	2.36524	22.2056	1.96391	1.96974	2.36524	22.2056	1.96391
F12		123.731	123.688	141.44	124.314	84.691											132.722	128.934	151.718	129.587	88.2833	5.01042	5.04008	23.9397	5.07031	3.01675	1.99366	2.02333	20.923	2.05356
F13		120.525	119.19	118.715	120.351	83.759											129.283	124.246	127.341	125.456	87.3118	1.57145	0.351294	-0.436575	0.939217	2.04522	-0.473767	-1.69393	-2.4818	-1.106	-0.27194	-0.429476	-0.919293	-1.4083	0	0	0	0
F14		119.568	120.244	120.295	118.399	82.387											128.256	125.344	129.036	123.421	85.8816	0.544914	1.45	1.25824	-1.09558	0.615026	-0.0701121	0.834976	0.64321	-1.71061
F15		118.488	119.165	120.18	118.804	83.619											127.098	124.22	128.913	123.843	87.1658	-0.613564	0.325234	1.13488	-0.673401	1.89928	-2.51285	-1.57405	-0.764404	-2.57268	-1.64744	-1.69288	-0.667026	-3.24973	0	0	0	0
F16		120.5	119.347	120.76	117.915	84.029											129.256	124.409	129.535	122.917	87.5932	1.54464	0.514954	1.75702	-1.60011	2.32667	-0.782036	-1.81172	-0.569649	-3.92678
F17		123.384	121.18	121.767	122.281	84.276											132.35	126.32	130.615	127.468	87.8507	4.6382	2.4257	2.8372	2.95108	2.58415	2.05405	-0.158447	0.253048	0.366931	2.00992	0.801618	1.58676	1.10548	2.00992	0.801618	1.58676	1.10548
F18		122.465	122.161	123.417	122.837	83.415											131.364	127.343	132.385	128.047	86.9532	3.65242	3.44831	4.60709	3.53066	1.68663	1.96579	1.76168	2.92046	1.84403
F19		121.333	120.99	124.521	124.576	83.949											130.15	126.122	133.569	129.86	87.5098	2.43817	2.22764	5.79132	5.34343	2.24328	0.194887	-0.0156362	3.54804	3.10015	-0.115517	0.70728	1.90699	2.12861	0	0.70728	1.90699	2.12861
F20		121.452	123.095	122.159	123.43	84.667											130.277	128.316	131.036	128.665	88.2583	2.56581	4.42193	3.25768	4.14882	2.99174	-0.425921	1.4302	0.265947	1.15708
F21		121.884	121.376	120.878	121.486	83.346											130.741	126.524	129.662	126.639	86.8812	3.02921	2.63002	1.8836	2.12236	1.6147	1.4145	1.01531	0.268896	0.507657	0.551952	0.550396	0.115378	0.370058	0.551952	0.550396	0.115378	0.370058
F22		121.267	121.504	121.583	122.242	84.366											130.079	126.658	130.418	127.427	87.9445	2.36737	2.76345	2.63983	2.91043	2.67797	-0.310597	0.0854782	-0.0381402	0.232459
F23		121.333	125.446	126.843	123.961	83.319											130.15	130.767	136.06	129.219	86.8531	2.43817	6.87265	8.28204	4.70234	1.58656	0.851609	5.28609	6.69549	3.11578	0.864445	4.95148	5.43185	3.02978	0.864445	4.95148	5.43185	3.02978
F24		122.802	126.291	125.932	125.283	84.806											131.725	131.648	135.083	130.597	88.4032	4.01391	7.75349	7.30485	6.08042	3.13663	0.87728	4.61686	4.16822	2.94378
G1		120.676	120.657	120.812	120.12	84.763											129.445	125.775	129.591	125.215	88.3583	1.73343	1.88052	1.8128	0.698419	3.09181	-1.35838	-1.21129	-1.279	-2.39339	-2.44616	-1.52036	-1.53546	-2.92971	0	0	0	0
G2		119.469	120.909	121.155	119.936	85.608											128.15	126.038	129.959	125.023	89.2392	0.43872	2.14321	2.18073	0.506614	3.97265	-3.53393	-1.82944	-1.79192	-3.46603
G3		119.822	123.025	125.341	123.217	83.4											128.529	128.243	134.449	128.443	86.9375	0.817371	4.34896	6.6709	3.92678	1.67099	-0.853623	2.67797	4.99991	2.25579	-0.897691	2.55757	4.01672	1.63659	0	2.55757	4.01672	1.63659
G4		119.872	122.93	123.64	122.165	83.536											128.582	128.144	132.624	127.347	87.0793	0.871004	4.24993	4.8463	2.83016	1.81276	-0.941759	2.43717	3.03354	1.0174
G5		121.676	119.773	122.329	118.698	82.741											130.518	124.853	131.218	123.733	86.2506	2.80609	0.959023	3.44004	-0.783897	0.984041	1.82205	-0.025018	2.45599	-1.76794	1.88956	0.396118	2.59859	-1.5532	1.88956	0.396118	2.59859	0
G6		122.211	121.002	123.004	119.531	83.162											131.091	126.134	131.942	124.601	86.6894	3.37997	2.24015	4.16408	0.0844357	1.4229	1.95707	0.817255	2.74119	-1.33846
G7		120.626	121.773	123.915	122.147	83.068											129.391	126.938	132.919	127.328	86.5915	1.67979	3.04386	5.14128	2.8114	1.32491	0.354882	1.71894	3.81637	1.48649	1.46484	2.77856	3.89818	1.60897	1.46484	2.77856	3.89818	1.60897
G8		121.818	122.903	123.19	121.479	82.165											130.67	128.116	132.142	126.632	85.6502	2.95841	4.22179	4.3636	2.11506	0.383609	2.5748	3.83818	3.97999	1.73145
G9		121.006	120.605	123.535	121.238	83.407											129.799	125.721	132.512	126.38	86.9448	2.08741	1.82631	4.73367	1.86384	1.67829	0.409115	0.148023	3.05538	0.18555	0.298945	0.0062545	2.01414	0.436251	0.298945	0.0062545	2.01414	0.436251
G10		122.027	121.595	122.82	122.981	84.669											130.894	126.753	131.745	128.197	88.2604	3.1826	2.85831	3.96671	3.68077	2.99382	0.188776	-0.135514	0.972894	0.686952
G11		119.521	120.3	121.202	120.967	84.82											128.206	125.403	130.009	126.098	88.4178	0.494498	1.50838	2.23114	1.58135	3.15123	-2.65673	-1.64285	-0.920083	-1.56988	-1.27918	-1.33221	0.261707	-2.36785	0	0	0.261707	0
G12		119.831	118.572	121.147	117.112	82.496											128.538	123.601	129.95	122.079	85.9952	0.827024	-0.292919	2.17215	-2.43717	0.728649	0.0983753	-1.02157	1.4435	-3.16582
G13		119.382	120.572	120.519	119.523	83.364											128.057	125.686	129.276	124.593	86.9	0.345398	1.79191	1.49851	0.0760964	1.63347	-1.28807	0.158447	-0.134954	-1.55737	-1.25035	0.682783	1.19855	-1.14874	0	0.682783	1.19855	0
G14		119.395	121.519	122.948	120.248	83.305											128.071	126.673	131.882	125.348	86.8385	0.359343	2.77908	4.10402	0.831848	1.57196	-1.21262	1.20712	2.53205	-0.740116
G15		122.335	121.062	124.289	121.798	83.44											131.224	126.197	133.32	126.964	86.9792	3.51298	2.3027	5.54246	2.44759	1.71269	1.80029	0.590008	3.82977	0.734904	1.41615	1.15239	3.47888	0.745328	1.41615	1.15239	3.47888	0.745328
G16		121.99	122.523	124.006	122.2	83.822											130.854	127.72	133.017	127.383	87.3774	3.14291	3.82567	5.23889	2.86665	2.11089	1.03201	1.71478	3.128	0.755752
G17		121.694	123.843	124.012	122.756	84.116											130.537	129.096	133.023	127.963	87.6839	2.8254	5.20166	5.24533	3.44623	2.41736	0.408035	2.78429	2.82797	1.02887	1.61521	1.76377	3.79111	1.09819	1.61521	1.76377	3.79111	1.09819
G18		124.868	122.835	126.731	123.839	85.066											133.941	128.045	135.94	129.092	88.6742	6.23004	4.1509	8.16191	4.57517	3.40766	2.82238	0.743243	4.75425	1.16751
G19		131.789	132.541	143.579	138.727	83.853											141.365	138.163	154.012	144.611	87.4098	13.6539	14.2686	26.2342	20.0947	2.14321	11.5107	12.1254	24.091	17.9515	10.5619	15.6545	24.4813	19.1544	10.5619	15.6545	24.4813	19.1544
G20		130.496	139.802	144.783	141.525	84.343											139.978	145.732	155.304	147.528	87.9205	12.267	21.8376	27.5256	23.0113	2.65399	9.613	19.1836	24.8717	20.3574
G21		145.952	150.99	143.936	147.39	84.734											156.558	157.394	154.395	153.642	88.3281	28.8461	33.5001	26.6171	29.1251	3.06158	25.7845	30.4386	23.5555	26.0635	23.7985	31.3481	26.8985	25.8869	23.7985	31.3481	26.8985	25.8869
G22		141.045	151.496	148.965	145.812	83.495											151.294	157.922	159.789	151.997	87.0366	23.5825	34.0276	32.0115	27.4802	1.77002	21.8125	32.2576	30.2415	25.7102
G23		128.409	138.048	146.746	132.483	84.158											137.74	143.904	157.409	138.102	87.7277	10.0283	20.0092	29.6313	13.5858	2.46115	7.5672	17.548	27.1701	11.1247	6.23802	16.1251	25.9606	10.6102	6.23802	16.1251	25.9606	10.6102
G24		125.818	135.202	144.378	131.38	84.042											134.961	140.937	154.869	136.953	87.6068	7.24907	17.0425	27.0912	12.436	2.34023	4.90884	14.7022	24.751	10.0958
H1		119.362	121.397	123.159	119.994	85.114											128.035	126.546	132.108	125.084	88.7242	0.323945	2.65191	4.33035	0.567075	3.4577	-3.13375	-0.805788	0.872652	-2.89062	-1.83231	-0.398203	1.28271	-1.64962	0	0	1.28271	0
H2		121.601	121.986	123.736	122.182	84.921											130.437	127.16	132.727	127.365	88.5231	2.72564	3.26589	4.94927	2.84788	3.25651	-0.530868	0.00938175	1.69277	-0.408627
H3		120.281	125.814	124.638	122.826	84.222											129.021	131.151	133.695	128.036	87.7944	1.30972	7.25626	5.91682	3.5192	2.52786	-1.21814	4.7284	3.38896	0.991338	-1.43722	3.67087	3.31576	0.563947	0	3.67087	3.31576	0.563947
H4		120.545	124.477	125.174	122.698	84.914											129.304	129.757	134.27	127.902	88.5158	1.59291	5.86255	6.49177	3.38577	3.24921	-1.65631	2.61334	3.24255	0.136557
H5		120.24	122.405	124.616	121.5	84.098											128.977	127.597	133.671	126.654	87.6651	1.26574	3.70266	5.89322	2.13695	2.3986	-1.13286	1.30406	3.49462	-0.261647	-0.652966	2.36264	4.3612	0.450324	0	2.36264	4.3612	0.450324
H6		120.713	124.002	125.81	122.432	83.664											129.485	129.262	134.952	127.625	87.2127	1.77311	5.3674	7.17398	3.10849	1.94619	-0.173077	3.42121	5.22779	1.16229
H7		121.99	123.171	126.395	122.19	83.326											130.854	128.395	135.579	127.373	86.8604	3.14291	4.50115	7.80149	2.85622	1.59385	1.54905	2.9073	6.20764	1.26237	1.25347	2.78429	6.03433	1.48023	1.25347	2.78429	6.03433	1.48023
H8		120.952	122.434	125.585	122.107	82.825											129.741	127.627	134.711	127.286	86.3381	2.02948	3.73289	6.93263	2.7697	1.0716	0.957877	2.66129	5.86103	1.6981
H9		121.558	121.884	123.822	122.568	83.4											130.391	127.054	132.819	127.767	86.9375	2.67952	3.15956	5.04152	3.25025	1.67099	1.00852	1.48857	3.37053	1.57926	-0.112658	0.812564	2.75404	0.285101	0	0.812564	2.75404	0.285101
H10		121.037	122.202	124.242	121.7	85.015											129.832	127.385	133.27	126.862	88.621	2.12066	3.49105	5.49204	2.34544	3.3545	-1.23384	0.136557	2.13755	-1.00906
H11		124.465	130.663	130.215	130.324	84.237											133.509	136.205	139.677	135.852	87.81	5.79775	12.3109	11.8991	11.3352	2.5435	3.25426	9.76744	9.35557	8.79174	4.18312	10.9902	10.2667	11.6902	4.18312	10.9902	10.2667	11.6902
H12		125.917	132.721	131.634	135.597	83.949											135.067	138.351	141.199	141.349	87.5098	7.35526	14.4562	13.4212	16.8319	2.24328	5.11198	12.213	11.1779	14.5886
H13		120.694	121.11	121.758	121.725	85.157											129.464	126.247	130.606	126.888	88.7691	1.75273	2.35273	2.82754	2.3715	3.50252	-1.74979	-1.14979	-0.674975	-1.13102	-0.299187	0.0724479	0.215155	-1.15552	0	0.0724479	0.215155	0
H14		121.595	121.599	121.614	119.822	83.301											130.431	126.757	130.451	124.904	86.8343	2.71921	2.86248	2.67308	0.387779	1.56779	1.15141	1.29468	1.10529	-1.18002
H15		122.202	121.083	121.171	119.182	82.471											131.082	126.219	129.976	124.237	85.9691	3.37031	2.32459	2.19789	-0.279368	0.702589	2.66772	1.622	1.4953	-0.981956	1.83396	0.808394	1.49768	-0.903775	1.83396	0.808394	1.49768	0
H16		121.455	120.353	121.983	120.163	83.302											130.28	125.458	130.847	125.26	86.8354	2.56903	1.56362	3.06889	0.743243	1.56884	1.0002	-0.00521208	1.50006	-0.825594
H17		122.097	123.221	122.612	120.911	82.477											130.969	128.448	131.522	126.04	85.9754	3.25768	4.55328	3.7436	1.52297	0.708843	2.54884	3.84443	3.03476	0.814127	2.06656	3.61302	3.37253	1.6121	2.06656	3.61302	3.37253	1.6121
H18		121.983	123.585	124.027	123.25	83.285											130.847	128.827	133.039	128.478	86.8177	3.1354	4.93271	5.26142	3.96118	1.55112	1.58428	3.3816	3.7103	2.41007
H19		124.711	126.368	127.442	124.221	82.799											133.773	131.728	136.703	129.49	86.311	6.06163	7.83376	8.92457	4.97337	1.0445	5.01713	6.78926	7.88007	3.92887	4.23803	6.38063	7.2785	3.08034	4.23803	6.38063	7.2785	3.08034
H20		123.857	126.2	126.919	123.209	83.415											132.857	131.553	136.142	128.435	86.9532	5.14557	7.65863	8.36357	3.91844	1.68663	3.45894	5.972	6.67694	2.23181
H21		124.339	122.496	134.574	122.145	82.289											133.374	127.692	144.353	127.326	85.7794	5.6626	3.79752	16.5748	2.80931	0.512869	5.14973	3.28465	16.0619	2.29644	3.72571	2.13956	17.4757	0.167308	3.72571	2.13956	17.4757	0.167308
H22		123.955	122.636	139.481	120.397	84.626											132.962	127.838	149.616	125.504	88.2155	5.25069	3.94346	21.8384	0.987168	2.949	2.3017	0.994465	18.8894	-1.96183
H23		121.981	122.612	124.787	122.105	82.411											130.845	127.813	133.855	127.284	85.9066	3.13325	3.91844	6.07665	2.76762	0.640044	2.49321	3.2784	5.4366	2.12757	1.45042	2.95786	2.99452	1.64076	1.45042	2.95786	2.99452	1.64076
H24		121.198	123.192	121.395	122.366	83.606											130.005	128.417	130.216	127.556	87.1523	2.29336	4.52305	2.43817	3.03969	1.88573	0.407626	2.63731	0.552435	1.15396
I1		129.558	130.426	126.436	129.868	84.281											138.972	135.958	135.623	135.377	87.8559	11.2608	12.0639	7.84547	10.8599	2.58936	8.67147	9.47452	5.25611	8.27053	7.2947	9.9728	5.45239	7.67114	7.2947	9.9728	5.45239	7.67114
I2		128.61	133.048	128.421	130.384	85.947											137.955	138.691	137.753	135.914	89.5926	10.2439	14.7971	9.97471	11.3978	4.32603	5.91792	10.4711	5.64868	7.07175
I3		124.909	131.316	130.438	129.122	84.122											133.985	136.886	139.916	134.599	87.6902	6.27402	12.9916	12.1383	10.0823	2.42362	3.8504	10.568	9.71466	7.65863	1.72049	8.41334	7.88616	6.869	1.72049	8.41334	7.88616	6.869
I4		122.721	129.017	128.812	129.442	85.957											131.638	134.489	138.172	134.932	89.603	3.92703	10.5951	10.3941	10.4158	4.33645	-0.409427	6.25867	6.05767	6.07937
I5		121.421	121.653	123.754	122.037	83.368											130.244	126.813	132.747	127.213	86.9042	2.53256	2.91877	4.96858	2.69673	1.63764	0.894925	1.28113	3.33095	1.0591	1.50991	2.63054	3.02558	1.7252	1.50991	2.63054	3.02558	1.7252
I6		122.521	124.194	123.138	123.267	83.32											131.424	129.462	132.086	128.496	86.8541	3.71249	5.56755	4.30782	3.9789	1.5876	2.12489	3.97995	2.72022	2.3913
I7		119.585	122.605	122.171	120.899	84.07											128.275	127.805	131.049	126.027	87.636	0.563149	3.91115	3.27055	1.51046	2.36941	-1.80626	1.54173	0.901142	-0.858951	-1.14282	0.617632	0.769209	-0.887096	0	0.617632	0.769209	0
I8		119.754	119.733	120.857	119.746	82.971											128.456	124.812	129.639	124.825	86.4903	0.744429	0.917327	1.86107	0.308555	1.2238	-0.479368	-0.30647	0.637276	-0.915242
I9		121.694	122.347	124.355	122.959	83.136											130.537	127.537	133.391	128.174	86.6623	2.8254	3.6422	5.61325	3.65784	1.3958	1.4296	2.24641	4.21746	2.26204	0.502401	2.30061	2.95129	2.71862	0.502401	2.30061	2.95129	2.71862
I10		120.593	123.097	122.622	124.481	83.782											129.356	128.318	131.532	129.761	87.3357	1.64439	4.42402	3.75433	5.2444	2.0692	-0.424802	2.35482	1.68513	3.1752
I11		122.198	124.541	124.26	125.705	83.769											131.077	129.824	133.289	131.037	87.3222	3.36602	5.92927	5.51135	6.52032	2.05565	1.31038	3.87362	3.45571	4.46467	1.83326	5.04321	3.69165	4.93532	1.83326	5.04321	3.69165	4.93532
I12		122.998	126.605	124.525	126.428	83.589											131.936	131.975	133.574	131.791	87.1346	4.22415	8.08081	5.79561	7.27398	1.86801	2.35614	6.2128	3.9276	5.40597
I13		123.837	127.322	128.023	125.649	83.933											132.836	132.723	137.326	130.979	87.4931	5.12412	8.82823	9.54779	6.46194	2.2266	2.89752	6.60162	7.32119	4.23534	3.40423	7.33601	7.0411	4.07898	3.40423	7.33601	7.0411	4.07898
I14		124.326	128.262	127.045	124.88	83.464											133.36	133.702	136.277	130.177	87.0043	5.64865	9.8081	8.49872	5.66032	1.73771	3.91094	8.07039	6.76101	3.92261
I15		121.562	125.048	122.829	122.996	84.607											130.395	130.352	131.754	128.213	88.1957	2.68381	6.45777	3.97637	3.69641	2.92919	-0.245383	3.52858	1.04718	0.767219	0.439228	2.53411	1.62399	-0.0432603	0.439228	2.53411	1.62399	0
I16		122.51	122.802	123.576	121.103	84.269											131.412	128.011	132.556	126.24	87.8434	3.70069	4.1165	4.77765	1.72311	2.57685	1.12384	1.53965	2.20079	-0.853739
I17		123.488	126.653	133.169	124.362	84.038											132.461	132.025	142.846	129.637	87.6026	4.74976	8.13085	15.0677	5.12035	2.33606	2.4137	5.79479	12.7317	2.78429	3.5535	6.90132	15.3657	3.61823	3.5535	6.90132	15.3657	3.61823
I18		125.791	128.959	138.258	126.145	84.221											134.932	134.429	148.304	131.496	87.7934	7.22011	10.5347	20.5265	6.97898	2.52682	4.69329	8.00784	17.9997	4.45216
I19		148.562	146.804	210.019	141.409	90.309											159.357	153.031	225.28	147.407	94.1396	31.6458	29.1366	97.502	22.8904	8.87305	22.7727	20.2635	88.629	14.0174	23.9135	21.4097	92.7651	15.7723	23.9135	21.4097	92.7651	15.7723
I20		149.413	147.69	216.455	143.463	88.996											160.27	153.954	232.184	149.548	92.7709	32.5586	30.0602	104.406	25.0315	7.50436	25.0542	22.5558	96.9013	17.5272
I21		120.7	120.033	123.469	119.977	84.047											129.471	125.124	132.441	125.066	87.612	1.75917	1.23005	4.66287	0.549353	2.34544	-0.586267	-1.11539	2.31744	-1.79608	-0.234937	0.174084	1.45773	-1.36974	0	0.174084	1.45773	0
I22		120.599	121.729	121.11	120.017	83.269											129.362	126.892	129.91	125.108	86.801	1.65083	2.99799	2.13246	0.59105	1.53444	0.116394	1.46355	0.59802	-0.943387
J1	Reference Spot	219.924	230.388	239.521	236.099	239.874	0.868735	0.936561	0.948318	0.92504	0.949644
J2	Reference Spot	218.777	242.564	239.368	231.035	239.685
J3		125.519	128.14	129.176	128.51	90.391											134.64	133.575	138.563	133.961	94.2251	6.92834	9.68092	10.7846	9.44429	8.95853	-2.03019	0.722395	1.82604	0.485766	-2.10313	-0.434688	0.370969	-0.653074	0	0	0.370969	0
J4		120.558	120.955	121.638	121.36	85.426											129.318	126.085	130.477	126.508	89.0495	1.60685	2.19116	2.69882	1.99102	3.78293	-2.17608	-1.59177	-1.08411	-1.79191
J5		120.599	120.814	122.421	121.744	84.564											129.362	125.939	131.317	126.908	88.1509	1.65083	2.04418	3.53872	2.3913	2.88437	-1.23354	-0.840188	0.654354	-0.493063	0.0236011	0.139163	2.0268	0.443027	0.0236011	0.139163	2.0268	0.443027
J6		121.804	121.521	123.841	122.368	83.392											130.655	126.675	132.84	127.558	86.9292	2.94339	2.78117	5.0619	3.04177	1.66265	1.28074	1.11851	3.39925	1.37912
J7		121.636	125.405	125.992	124.213	83.581											130.475	130.724	135.147	129.482	87.1262	2.76318	6.82991	7.36921	4.96503	1.85967	0.903513	4.97024	5.50954	3.10536	0.910836	5.43151	4.35087	4.12224	0.910836	5.43151	4.35087	4.12224
J8		121.81	126.455	123.992	126.329	83.746											130.661	131.819	133.002	131.687	87.2982	2.94983	7.92445	5.22388	7.17078	2.03167	0.918158	5.89278	3.19221	5.13911
J9		120.684	121.556	124.773	123.227	83.052											129.453	126.712	133.84	128.454	86.5748	1.74201	2.81765	6.06163	3.93721	1.30823	0.433775	1.50942	4.7534	2.62897	0.674075	2.23181	3.69255	3.16217	0.674075	2.23181	3.69255	3.16217
J10		121.616	123.44	123.279	124.748	83.55											130.453	128.676	132.237	130.039	87.0939	2.74173	4.78156	4.45907	5.52272	1.82736	0.914375	2.95421	2.63171	3.69537
J11		120.364	122.38	121.548	122.221	84.086											129.11	127.571	130.38	127.405	87.6526	1.39875	3.6766	2.60228	2.88854	2.38609	-0.987337	1.29051	0.216193	0.502445	-0.130104	3.00946	1.58509	1.69758	0	3.00946	1.58509	1.69758
J12		120.595	124.271	122.733	123.107	82.679											129.358	129.542	131.651	128.329	86.186	1.64654	5.64781	3.87339	3.81212	0.919411	0.727129	4.7284	2.95398	2.89271
J13		121.246	123.085	122.56	121.612	84.305											130.056	128.306	131.466	126.77	87.8809	2.34485	4.41151	3.68782	2.2537	2.61438	-0.269536	1.79713	1.07344	-0.360676	0.473635	2.64305	2.41409	0.622844	0.473635	2.64305	2.41409	0.622844
J14		121	123.029	123.428	121.82	82.626											129.792	128.247	132.397	126.987	86.1307	2.08097	4.35313	4.61889	2.47053	0.864163	1.21681	3.48897	3.75473	1.60636
J15		122.829	123.122	122.37	121.977	83.026											131.754	128.344	131.262	127.151	86.5477	4.04287	4.45008	3.48401	2.63419	1.28113	2.76174	3.16895	2.20289	1.35306	1.35003	2.70559	2.46668	0.732819	1.35003	2.70559	2.46668	0.732819
J16		121.432	123.504	124.097	122.058	84.297											130.256	128.743	133.114	127.235	87.8726	2.54436	4.84828	5.33651	2.71862	2.60604	-0.0616806	2.24224	2.73047	0.112581
J17		123.895	129.742	135.345	123.31	84.051											132.898	135.245	145.18	128.54	87.6161	5.18633	11.3509	17.4018	4.02373	2.34961	2.83673	9.00127	15.0522	1.67412	3.41469	10.2032	16.3854	3.63126	3.41469	10.2032	16.3854	3.63126
J18		124.167	131.219	137.025	126.236	83.222											133.19	136.785	146.982	131.59	86.752	5.4781	12.8905	19.2039	7.07384	1.48544	3.99266	11.4051	17.7185	5.58839
J19		122.738	127.374	133.279	124.114	83.347											131.657	132.777	142.964	129.378	86.8823	3.94526	8.88243	15.1857	4.86183	1.61575	2.32952	7.26669	13.57	3.24608	3.02046	8.44409	13.9187	3.79544	3.02046	8.44409	13.9187	3.79544
J20		122.554	128.118	132.457	123.653	81.832											131.459	133.552	142.082	128.898	85.303	3.74789	9.65799	14.304	4.38128	0.0364846	3.71141	9.6215	14.2675	4.34479
J21		121.351	123.194	122.893	120.686	84.249											130.169	128.419	131.823	125.805	87.8225	2.45747	4.52513	4.04502	1.28843	2.55601	-0.0985304	1.96912	1.48901	-1.26758	0.484013	2.3887	1.50733	-0.329925	0.484013	2.3887	1.50733	0
J22		122.167	123.721	122.657	122.207	83.971											131.044	128.969	131.57	127.391	87.5328	3.33277	5.07448	3.79187	2.87394	2.26621	1.06656	2.80827	1.52566	0.607729
J23	negative control	120.043	120.626	120.921	120.095	83.689
J24	negative control	120.178	118.749	119.771	119.68	84.161
"J25"	blank spot	119.06	118.853	119.122	119.45	81.797											127.711	123.894	127.778	124.517	85.2665
