# Supplementary material for: Pro-inflammatory secretome from intestinal epithelium recruits regulatory T cells for barrier defence
Source: Research Square preprint supplement (doi:10.21203/rs.3.rs-5431057/v1), 2025-05-12
Supplement: Supplementary file 3 [file 601048c358e614c424343b6d.xlsx]

## Sheet: Legend
Table 1: A. Single cell RNA sequencing differential expression analysis of NF-κB target genes in Cdh1+ cells (epithelial cells). B-D: GO terms from DAVID analysis BP FAT. B. Untreated only Cdh1+ cells. C. Colitis only Cdh1+ cells. D. Recovery only Cdh1+ cells. E. REVIGO (from DAVID GO terms). GO terms used for Fig. 1k. F. Differential expression analysis of EGFP+ Cdh1+ cells showing enrichment of…

## Sheet: A. NF-κB epithelial genes
Untreated				Colitis				Recovery						Epithelial NF-κB genes
Gene	Log2	p-value		Gene	Log2	p-value		Gene	Log2	p-value				Ccl2
Wnt10b	5.20786	0.0259154		Il6	4.59806	0.00513137		Sele	4.2494	0.0498391				Gstp1
Alox5	3.99729	0.00134123		Cd40lg	3.96801	0.00070279		Alox5	1.3396	0.022113				Ccl4
Aicda	3.7816	2.82516e-05		Ccr7	3.46682	0.000226747		Aicda	2.23772	4.39052e-12				Spi1
Ighg1	3.49637	0.0262392		Gzmb	3.28598	0.00130613		Ighg1	1.54896	0.00457908				Ccl5
Apoe	3.47668	6.36884e-08		Il1b	3.28172	0.00084		Ccr7	2.01236	0.000677013				Fth1
Ltb	3.29532	2.82516e-05		Ighg1	3.238	0.000120693		Ltb	1.68817	5.47528e-10				Mt3
Cd3g	3.2597	0.00182554		Tgm1	3.20902	0.0276177		Gzmb	1.87903	0.00216846				Fabp6
Spi1	3.21224	8.37061e-05		Vcam1	3.16788	5.33389e-08		Cd3g	2.20157	1.60358e-11				Lcn2
Ccr5	3.11836	0.000460331		Cd3g	3.02295	2.24784e-07		Spi1	2.60185	1.57761e-24				Irf7
Eng	3.05947	0.0167751		Cd48	3.00732	4.94623e-12		Ccr5	1.53092	3.00992e-07				C3
Ccl5	2.96297	0.0121877		Ptafr	2.93665	6.33595e-05		Ccl4	2.19051	0.00894223				Pglyrp1
Map4k1	2.86391	0.000729549		Spi1	2.89154	1.77511e-09		Cd40lg	2.2494	0.00453908				Upp1
Il16	2.77209	0.0103677		Tfec	2.8611	7.62302e-05		Ccl5	1.55123	1.37314e-05				S100a6
Irf4	2.71796	0.0249797		Gata3	2.77971	0.00150903		Map4k1	1.91288	1.89065e-14				Cxcl2
Cd48	2.61934	0.00378743		Map4k1	2.76156	2.99005e-09		Il16	1.67749	3.78739e-08				Irf4
Cd40	2.57559	0.0139248		Btk	2.68139	3.44354e-11		Klra1	3.2494	0.00336808				Vim
Btk	2.52428	0.00127042		Alox5	2.66845	0.00657409		Irf4	1.70947	1.07783e-07				Psme2
Pim1	2.13176	0.00878511		Ccl5	2.64387	4.12139e-05		Gata3	1.3396	0.0153337				Cd40
Ptpn1	1.68295	0.0438761		Cd86	2.63385	2.00976e-08		Cd48	2.80942	2.62262e-33				Pycard
				Cd40	2.62875	2.74786e-07		Cd40	2.88756	6.57258e-30				Cfb
				Cd80	2.61605	2.21918e-06		Btk	2.62425	9.98432e-38				Bmp4
				Il27	2.38305	0.00737499		Il1b	2.35374	1.08544e-05				Npy1r
				Nfkbie	2.24219	0.00183418		Vim	1.66886	2.23495e-08				Ctsl
				Ccr5	2.21277	0.000225796		Cd86	3.31353	1.42685e-47				Klf10
				Cd2	2.20307	0.0025183		Lef1	2.7519	2.56365e-28				Ccr5
				Cr2	2.14537	3.16277e-07		Lta	3.38326	1.50563e-19				Slfn2
				Lef1	2.07226	0.0003991		Eno2	1.47888	0.0354191				S100a10
				Ltb	2.06969	0.00039973		Nfkbie	1.83436	5.0333e-08				Pim1
				Abca1	2.06518	9.52167e-07		Igfbp3	-1.50549	0.0471001				Lamb2
				Apoe	2.04647	2.25053e-05		Slfn2	1.28562	2.46999e-05				Bax
				Oprm1	2.02314	8.52578e-05		Gstp1	-1.1594	0.00821804				Ltb
				Vim	1.96011	0.00379892		Cd274	1.10093	6.27927e-06				Lgals3
				Il16	1.87838	0.00965184		Cd80	2.44809	6.86634e-19				Cd274
				Traf1	1.79071	0.000452705		Tfec	2.86474	7.91239e-15				Ticam1
				Slfn2	1.68896	0.0188375		Ptpn1	0.904975	4.411e-06				Nfkbia
				Lyn	1.62607	4.88317e-05		Il2ra	3.0379	9.4562e-10				Map4k1
				Cd274	1.56843	0.00478494		Bmi1	0.903905	0.00499851				Gadd45b
				Ptpn1	1.36266	0.00214823		Cd2	3.33254	1.94042e-27				Ier2
				Rel	1.29852	0.00730428		Abca1	1.81815	3.91727e-20				Cxcl9
				Tap1	1.24932	0.0187519		Ltf	1.88683	0.001258				Cebpd
				Mylk	-2.39959	0.00738504		Cfb	-0.946996	0.00703173				Ctsb
								Tnfrsf9	1.66444	0.000989839				Sat1
								Pglyrp1	-1.32618	1.28546e-08				Psmb9
								Lyn	1.22662	3.36339e-12				Dnase1l2
								Cr2	2.49378	5.51621e-39				Junb
								Rel	1.0858	2.76783e-08				Tff3
								S100a6	-0.997171	7.68659e-06				Ucp2
								Tap1	0.731143	0.0016954				Btk
								Klf10	-0.737831	0.00852508				Psme1
								St8sia1	1.2658	1.84693e-06				Tapbp
								Irf7	-1.08599	0.000252806				Ass1
								Ticam1	-0.933463	0.0309127				Gnai2
								St6gal1	0.514896	0.0320974				Cldn2
								Oprm1	3.91365	2.44881e-70				Ier3
								Ptafr	2.04658	4.58052e-07				Nfkb2
								Traf1	1.34848	8.69625e-09				Plk3
								Ar	0.975039	0.0230664				Elf3
								Gcnt1	0.69466	0.00447576				Apoe
								Fas	0.654455	0.00831634				Hsp90aa1
								Pde7a	0.757188	0.000138942				Pgk1
								Hpse	0.55211	0.045842				Relb
								Tff3	-1.46162	7.77931e-08				Sox9
								Lbp	-1.61478	3.95823e-06				Ccnd2
								F11r	-0.566516	0.0359151				Ifi44l
								Hsd11b2	-0.67131	0.0144384				Nuak2
								Elf3	-0.67896	0.00909785				Bcl3
								Sh3bgrl	0.58939	0.0105189				Fos
								Cxcl2	1.45031	0.0406215				Pdgfb
														Hgf
														Lbp
														Adora1
														Brca2
														Muc2
														Lyn
														Saa1
														Nox1
														Tifa
														Cdk6
														Cxcl5
														Ccl22
														Nos1
														Bdnf
														Pax8
														Cr2
														Pde7a
														Il2ra
														Trpc1
														Gucy1a2
														Cd44
														Egr1
														Il15
														Egfr
														Vegfc
														Sh3bgrl
														Dpyd
														Tfpi2
														Tgm1
														Saa3
														Pgr

## Sheet: B. Untreated only
TermID	Name	LogSize	Frequency	Uniqueness	Dispensability	PC_0	PC_1	Representative
GO:0001701	in utero embryonic development	4.12094	0.0325592	0.929715	0.39517	-5.11592	-3.23615	null
GO:0001892	embryonic placenta development	3.44264	0.00682733	0.932818	0.772552	null	null	1701
GO:0001890	placenta development	3.68006	0.0117962	0.95516	0	-5.72034	-2.68731	null
GO:0002068	glandular epithelial cell development	3.09517	0.00306614	0.941151	0.397479	-5.75227	-2.14537	null
GO:0002244	hematopoietic progenitor cell differentiation	3.93404	0.0211721	0.939041	0.67125	null	null	2068
GO:0003309	type B pancreatic cell differentiation	3.31471	0.00508476	0.922403	0.914624	null	null	2068
GO:0003323	type B pancreatic cell development	2.8791	0.00186334	0.921902	0.942626	null	null	2068
GO:0014002	astrocyte development	3.26221	0.00450555	0.925356	0.829868	null	null	2068
GO:0021782	glial cell development	3.97626	0.0233337	0.918968	0.590773	null	null	2068
GO:0030097	hemopoiesis	4.86461	0.180458	0.937131	0.519021	null	null	2068
GO:0030851	granulocyte differentiation	3.12287	0.00326825	0.943543	0.521012	null	null	2068
GO:0042063	gliogenesis	4.38081	0.0592326	0.921465	0.537496	null	null	2068
GO:0097028	dendritic cell differentiation	3.32634	0.00522278	0.942253	0.809243	null	null	2068
GO:1903131	mononuclear cell differentiation	4.51224	0.0801681	0.93357	0.809033	null	null	2068
GO:0002886	regulation of myeloid leukocyte mediated immunity	3.8105	0.0159296	0.725531	0.111991	8.05446	1.78421	null
GO:0002220	innate immune response activating cell surface receptor signaling pathway	3.8704	0.0182859	0.511768	0.852383	null	null	2886
GO:0002429	immune response-activating cell surface receptor signaling pathway	4.60351	0.0989174	0.48203	0.950452	null	null	2886
GO:0002431	Fc receptor mediated stimulatory signaling pathway	2.97589	0.00232918	0.567123	0.625633	null	null	2886
GO:0002683	negative regulation of immune system process	4.69901	0.123247	0.669038	0.661011	null	null	2886
GO:0002753	cytoplasmic pattern recognition receptor signaling pathway	3.74233	0.0136152	0.530158	0.830797	null	null	2886
GO:0002762	negative regulation of myeloid leukocyte differentiation	3.59988	0.0098072	0.639994	0.854272	null	null	2886
GO:0002767	immune response-inhibiting cell surface receptor signaling pathway	2.3075	0.000497878	0.679054	0.487021	null	null	2886
GO:0002768	immune response-regulating cell surface receptor signaling pathway	4.63312	0.105898	0.585973	0.753223	null	null	2886
GO:0002861	regulation of inflammatory response to antigenic stimulus	2.98091	0.00235629	0.702083	0.529489	null	null	2886
GO:0002862	negative regulation of inflammatory response to antigenic stimulus	2.67486	0.00116336	0.686023	0.776102	null	null	2886
GO:0030195	negative regulation of blood coagulation	3.86368	0.0180049	0.640083	0.81298	null	null	2886
GO:0033006	regulation of mast cell activation involved in immune response	2.26951	0.000455977	0.636716	0.655254	null	null	2886
GO:0034135	regulation of toll-like receptor 2 signaling pathway	2.5955	0.000968643	0.704144	0.502996	null	null	2886
GO:0034136	negative regulation of toll-like receptor 2 signaling pathway	2.23553	0.000421471	0.692765	0.662438	null	null	2886
GO:0034143	regulation of toll-like receptor 4 signaling pathway	3.35984	0.00564179	0.679212	0.743015	null	null	2886
GO:0034144	negative regulation of toll-like receptor 4 signaling pathway	2.69197	0.00121019	0.678457	0.750853	null	null	2886
GO:0038093	Fc receptor signaling pathway	3.27045	0.00459181	0.645504	0.777171	null	null	2886
GO:0038094	Fc-gamma receptor signaling pathway	2.74115	0.00135561	0.661278	0.584414	null	null	2886
GO:0038095	Fc-epsilon receptor signaling pathway	2.93197	0.00210489	0.654571	0.908954	null	null	2886
GO:0038096	Fc-gamma receptor signaling pathway involved in phagocytosis	1.73239	0.000130631	0.61081	0.806899	null	null	2886
GO:0043300	regulation of leukocyte degranulation	3.71416	0.01276	0.669534	0.778512	null	null	2886
GO:0043304	regulation of mast cell degranulation	3.66727	0.0114536	0.670928	0.82886	null	null	2886
GO:0045637	regulation of myeloid cell differentiation	4.17044	0.0364905	0.646545	0.698312	null	null	2886
GO:0045638	negative regulation of myeloid cell differentiation	3.7195	0.0129177	0.644438	0.870317	null	null	2886
GO:0045646	regulation of erythrocyte differentiation	3.26221	0.00450555	0.680149	0.8172	null	null	2886
GO:0045655	regulation of monocyte differentiation	3.08314	0.00298234	0.685981	0.798811	null	null	2886
GO:0050728	negative regulation of inflammatory response	4.24306	0.043133	0.690906	0.765807	null	null	2886
GO:0050854	regulation of antigen receptor-mediated signaling pathway	3.81231	0.0159962	0.679008	0.583665	null	null	2886
GO:0050855	regulation of B cell receptor signaling pathway	3.37731	0.00587348	0.694593	0.606996	null	null	2886
GO:0006525	arginine metabolic process	5.23668	0.425057	0.970887	0.0797791	1.67557	-6.71989	null
GO:0006527	arginine catabolic process	4.48652	0.0755566	0.96962	0.749179	null	null	6525
GO:0009065	glutamine family amino acid catabolic process	4.92843	0.209025	0.967531	0.535555	null	null	6525
GO:0006801	superoxide metabolic process	4.79299	0.153021	0.98308	0.0318544	-6.21919	3.73573	null
GO:0042554	superoxide anion generation	4.17883	0.0372028	0.984171	0.790037	null	null	6801
GO:0006954	inflammatory response	4.78525	0.15032	0.934773	0.164536	-1.34125	6.40475	null
GO:0007169	transmembrane receptor protein tyrosine kinase signaling pathway	5.17832	0.371614	0.708326	0.280136	1.94412	4.25378	null
GO:0048008	platelet-derived growth factor receptor signaling pathway	3.74811	0.0137976	0.757576	0.721754	null	null	7169
GO:0048012	hepatocyte growth factor receptor signaling pathway	3.25042	0.00438477	0.771315	0.668817	null	null	7169
GO:0048013	ephrin receptor signaling pathway	4.29308	0.0483976	0.740521	0.790224	null	null	7169
GO:0060396	growth hormone receptor signaling pathway	3.78061	0.0148698	0.7119	0.984837	null	null	7169
GO:0060397	growth hormone receptor signaling pathway via JAK-STAT	3.66567	0.0114117	0.715783	0.712415	null	null	7169
GO:0007263	nitric oxide mediated signal transduction	3.17696	0.00370204	0.799245	0.298244	1.44912	6.2262	null
GO:0007249	canonical NF-kappaB signal transduction	4.17161	0.0365891	0.773555	0.529056	null	null	7263
GO:0010389	regulation of G2/M transition of mitotic cell cycle	4.72331	0.130338	0.795975	0.161684	4.10171	2.93407	null
GO:0070302	regulation of stress-activated protein kinase signaling cascade	4.25708	0.0445477	0.721407	0.713935	null	null	10389
GO:1901976	regulation of cell cycle checkpoint	3.8038	0.0156856	0.735971	0.696649	null	null	10389
GO:1902749	regulation of cell cycle G2/M phase transition	4.76872	0.144705	0.795079	0.814085	null	null	10389
GO:2000001	regulation of DNA damage checkpoint	3.54851	0.00871286	0.729063	0.671035	null	null	10389
GO:0014074	response to purine-containing compound	4.00728	0.0250615	0.904164	0.193835	-1.1315	7.33258	null
GO:0019221	cytokine-mediated signaling pathway	4.99308	0.242575	0.687293	0.859813	null	null	14074
GO:0031663	lipopolysaccharide-mediated signaling pathway	3.74958	0.0138444	0.717506	0.911681	null	null	14074
GO:0032496	response to lipopolysaccharide	4.40147	0.0621188	0.871332	0.975575	null	null	14074
GO:0038043	interleukin-5-mediated signaling pathway	2.38739	0.000598932	0.771539	0.595874	null	null	14074
GO:0071222	cellular response to lipopolysaccharide	4.31696	0.0511335	0.863723	0.848489	null	null	14074
GO:0071300	cellular response to retinoic acid	3.59934	0.00979488	0.889549	0.757401	null	null	14074
GO:0071396	cellular response to lipid	4.93178	0.210642	0.871169	0.638803	null	null	14074
GO:1990869	cellular response to chemokine	4.33672	0.0535144	0.884699	0.498336	null	null	14074
GO:0014902	myotube differentiation	4.04724	0.0274769	0.945149	0.371904	-5.37066	-2.36982	null
GO:0007520	myoblast fusion	3.77041	0.0145247	0.946893	0.804508	null	null	14902
GO:0014910	regulation of smooth muscle cell migration	3.33586	0.00533863	0.807655	0.107355	4.57517	6.55226	null
GO:0002688	regulation of leukocyte chemotaxis	4.04968	0.0276322	0.641267	0.917965	null	null	14910
GO:0014911	positive regulation of smooth muscle cell migration	3.15564	0.00352458	0.722898	0.917278	null	null	14910
GO:0030335	positive regulation of cell migration	4.81478	0.160896	0.665389	0.794418	null	null	14910
GO:0040017	positive regulation of locomotion	4.87827	0.186223	0.677218	0.845232	null	null	14910
GO:0050920	regulation of chemotaxis	4.52498	0.082554	0.694062	0.634676	null	null	14910
GO:0050921	positive regulation of chemotaxis	4.12024	0.0325075	0.627891	0.867593	null	null	14910
GO:0071675	regulation of mononuclear cell migration	3.98254	0.0236738	0.681444	0.695868	null	null	14910
GO:0090025	regulation of monocyte chemotaxis	3.34262	0.00542243	0.669147	0.835699	null	null	14910
GO:1904752	regulation of vascular associated smooth muscle cell migration	2.74663	0.00137286	0.81486	0.554192	null	null	14910
GO:1904754	positive regulation of vascular associated smooth muscle cell migration	2.52892	0.000830617	0.740892	0.859369	null	null	14910
GO:2000147	positive regulation of cell motility	4.86451	0.180414	0.664829	0.984212	null	null	14910
GO:0018108	peptidyl-tyrosine phosphorylation	2.25527	0.000441188	0.974018	0.340259	-0.819104	-6.30327	null
GO:0018212	peptidyl-tyrosine modification	2.27416	0.000460906	0.981056	0.356519	-1.41454	-6.33111	null
GO:0030155	regulation of cell adhesion	4.96322	0.226458	0.811129	0.13343	4.96202	1.73224	null
GO:0030277	maintenance of gastrointestinal epithelium	3.38202	0.00593756	0.948634	0	-3.9684	-4.78707	null
GO:0001782	B cell homeostasis	3.35411	0.00556785	0.895122	0.688824	null	null	30277
GO:0003093	regulation of glomerular filtration	2.90472	0.00197672	0.753567	0.736197	null	null	30277
GO:0010669	epithelial structure maintenance	3.47871	0.00741887	0.952693	0.789078	null	null	30277
GO:0042311	vasodilation	3.68233	0.0118579	0.810698	0.888132	null	null	30277
GO:0045776	negative regulation of blood pressure	3.73038	0.0132455	0.809704	0.473321	null	null	30277
GO:0097746	blood vessel diameter maintenance	4.46567	0.0720148	0.791283	0.79186	null	null	30277
GO:0031281	positive regulation of cyclase activity	1.86923	0.000179926	0.817677	0.0730449	-4.55136	2.84834	null
GO:0010950	positive regulation of endopeptidase activity	2.42651	0.000655621	0.69934	0.721191	null	null	31281
GO:0031282	regulation of guanylate cyclase activity	0.90309	1.72532e-05	0.78544	0.898853	null	null	31281
GO:0032148	activation of protein kinase B activity	1.81954	0.000160208	0.69628	0.812956	null	null	31281
GO:0043086	negative regulation of catalytic activity	2.95182	0.00220348	0.800748	0.683027	null	null	31281
GO:0043405	regulation of MAP kinase activity	2.4624	0.00071231	0.741395	0.862519	null	null	31281
GO:0045737	positive regulation of cyclin-dependent protein serine/threonine kinase activity	1.59106	9.36601e-05	0.690577	0.876548	null	null	31281
GO:0051349	positive regulation of lyase activity	1.88081	0.000184856	0.817492	0.626321	null	null	31281
GO:0060314	regulation of ryanodine-sensitive calcium-release channel activity	1.65321	0.000108449	0.743259	0.866026	null	null	31281
GO:0061097	regulation of protein tyrosine kinase activity	2.13033	0.000330275	0.748854	0.700008	null	null	31281
GO:0061098	positive regulation of protein tyrosine kinase activity	1.8451	0.000170067	0.694768	0.83128	null	null	31281
GO:0090218	positive regulation of lipid kinase activity	0.69897	9.85896e-06	0.731739	0.729361	null	null	31281
GO:1901019	regulation of calcium ion transmembrane transporter activity	2.22011	0.000406682	0.729521	0.695394	null	null	31281
GO:1902959	regulation of aspartic-type endopeptidase activity involved in amyloid precursor protein catabolic process	1	2.21827e-05	0.791134	0.968059	null	null	31281
GO:1902961	positive regulation of aspartic-type endopeptidase activity involved in amyloid precursor protein catabolic process	0.90309	1.72532e-05	0.733793	0.860726	null	null	31281
GO:1904031	positive regulation of cyclin-dependent protein kinase activity	1.64345	0.000105984	0.690598	0.912736	null	null	31281
GO:1905247	positive regulation of aspartic-type peptidase activity	1.07918	2.71121e-05	0.731895	0.982433	null	null	31281
GO:0031399	regulation of protein modification process	5.11305	0.319758	0.753039	0.23867	5.34123	-0.63052	null
GO:0001932	regulation of protein phosphorylation	4.87395	0.18438	0.716441	0.63264	null	null	31399
GO:0001934	positive regulation of protein phosphorylation	4.76634	0.143914	0.632073	0.965468	null	null	31399
GO:0010468	regulation of gene expression	6.75199	13.9239	0.707905	0.421362	null	null	31399
GO:0031401	positive regulation of protein modification process	4.93426	0.211847	0.645965	0.919777	null	null	31399
GO:0031952	regulation of protein autophosphorylation	3.61194	0.0100833	0.757444	0.799863	null	null	31399
GO:0031954	positive regulation of protein autophosphorylation	3.56324	0.00901355	0.682718	0.794117	null	null	31399
GO:0042327	positive regulation of phosphorylation	4.78478	0.150157	0.64432	0.981485	null	null	31399
GO:0050730	regulation of peptidyl-tyrosine phosphorylation	4.21171	0.0401284	0.739272	0.878124	null	null	31399
GO:0050731	positive regulation of peptidyl-tyrosine phosphorylation	4.1411	0.0341071	0.658476	0.868125	null	null	31399
GO:1902993	positive regulation of amyloid precursor protein catabolic process	3.16316	0.0035862	0.719701	0.476673	null	null	31399
GO:2000758	positive regulation of peptidyl-lysine acetylation	2.30103	0.000490483	0.738804	0.423902	null	null	31399
GO:0034110	regulation of homotypic cell-cell adhesion	3.40739	0.00629495	0.822226	0.108285	7.06297	4.36824	null
GO:0001954	positive regulation of cell-matrix adhesion	3.39428	0.00610763	0.732022	0.858995	null	null	34110
GO:0010544	negative regulation of platelet activation	2.75815	0.00140983	0.665656	0.877285	null	null	34110
GO:0010810	regulation of cell-substrate adhesion	4.26276	0.0451343	0.802808	0.726677	null	null	34110
GO:0010811	positive regulation of cell-substrate adhesion	4.03659	0.0268114	0.710654	0.763035	null	null	34110
GO:0033628	regulation of cell adhesion mediated by integrin	3.69055	0.0120846	0.816477	0.650104	null	null	34110
GO:0045785	positive regulation of cell adhesion	4.73398	0.133579	0.684399	0.848594	null	null	34110
GO:0090330	regulation of platelet aggregation	3.36305	0.00568369	0.742626	0.673327	null	null	34110
GO:0035729	cellular response to hepatocyte growth factor stimulus	2.69636	0.00122251	0.931075	0.128933	-2.88862	6.72799	null
GO:0035728	response to hepatocyte growth factor	2.70157	0.0012373	0.931316	0.544519	null	null	35729
GO:0036119	response to platelet-derived growth factor	3.21005	0.00399534	0.92737	0.606175	null	null	35729
GO:0036120	cellular response to platelet-derived growth factor stimulus	3.18554	0.00377598	0.927275	0.573699	null	null	35729
GO:0071363	cellular response to growth factor stimulus	4.92473	0.20725	0.909974	0.755064	null	null	35729
GO:0036211	protein modification process	6.18602	3.78261	0.970813	0.215919	0.0964535	-6.40999	null
GO:0006468	protein phosphorylation	5.61472	1.01505	0.959468	0.675153	null	null	36211
GO:0018198	peptidyl-cysteine modification	3.85896	0.0178102	0.977047	0.445928	null	null	36211
GO:0042127	regulation of cell population proliferation	5.2302	0.418764	0.80328	0.178001	3.64128	1.54807	null
GO:0042178	xenobiotic catabolic process	4.52231	0.0820487	0.881823	0.373841	-0.542851	7.08437	null
GO:1901701	cellular response to oxygen-containing compound	5.43468	0.670579	0.871073	0.580132	null	null	42178
GO:0044271	cellular nitrogen compound biosynthetic process	6.72073	12.957	0.974325	0.321445	2.57873	-6.47836	null
GO:0046209	nitric oxide metabolic process	4.04497	0.027334	0.985276	0	-6.87177	0.309838	null
GO:0006809	nitric oxide biosynthetic process	3.79546	0.0153874	0.979721	0.801189	null	null	46209
GO:0046496	nicotinamide nucleotide metabolic process	5.65906	1.12416	0.957947	0.310422	1.19685	-6.44033	null
GO:0006163	purine nucleotide metabolic process	6.11853	3.23821	0.955674	0.76477	null	null	46496
GO:0006739	NADP metabolic process	5.14728	0.345978	0.961434	0.871142	null	null	46496
GO:0016310	phosphorylation	6.32718	5.23538	0.970393	0.519465	null	null	46496
GO:0048522	positive regulation of cellular process	6.23254	4.21032	0.634518	0.380601	4.14484	0.712861	null
GO:0010557	positive regulation of macromolecule biosynthetic process	5.92904	2.09318	0.62107	0.942219	null	null	48522
GO:0031328	positive regulation of cellular biosynthetic process	5.93418	2.11814	0.621206	0.976356	null	null	48522
GO:0045893	positive regulation of DNA-templated transcription	5.80928	1.58872	0.625353	0.878405	null	null	48522
GO:0051173	positive regulation of nitrogen compound metabolic process	5.99677	2.44647	0.629332	0.843273	null	null	48522
GO:0051223	regulation of protein transport	4.64847	0.109706	0.752504	0.159525	6.19856	1.86646	null
GO:0002028	regulation of sodium ion transport	3.9567	0.0223059	0.758362	0.846571	null	null	51223
GO:0010765	positive regulation of sodium ion transport	2.93902	0.00213939	0.700232	0.792644	null	null	51223
GO:0010959	regulation of metal ion transport	4.64843	0.109696	0.740345	0.728121	null	null	51223
GO:0043266	regulation of potassium ion transport	4.34215	0.0541873	0.746569	0.898987	null	null	51223
GO:0043267	negative regulation of potassium ion transport	3.2418	0.00429851	0.743292	0.763941	null	null	51223
GO:0043271	negative regulation of monoatomic ion transport	4.00958	0.0251946	0.724763	0.853398	null	null	51223
GO:0051926	negative regulation of calcium ion transport	3.18412	0.00376366	0.74044	0.818509	null	null	51223
GO:0051928	positive regulation of calcium ion transport	3.56972	0.00914912	0.675383	0.872308	null	null	51223
GO:0090279	regulation of calcium ion import	3.31133	0.00504532	0.770608	0.771265	null	null	51223
GO:0090280	positive regulation of calcium ion import	3.13799	0.00338409	0.690545	0.79706	null	null	51223
GO:1902305	regulation of sodium ion transmembrane transport	3.0667	0.00287142	0.77052	0.746098	null	null	51223
GO:1902307	positive regulation of sodium ion transmembrane transport	2.30963	0.000500342	0.709931	0.521781	null	null	51223
GO:1902514	regulation of calcium ion transmembrane transport via high voltage-gated calcium channel	3.14239	0.00341859	0.765241	0.753709	null	null	51223
GO:1903169	regulation of calcium ion transmembrane transport	3.89938	0.0195479	0.745571	0.844144	null	null	51223
GO:1903170	negative regulation of calcium ion transmembrane transport	2.74429	0.00136547	0.743607	0.794819	null	null	51223
GO:1904064	positive regulation of cation transmembrane transport	3.80284	0.0156511	0.661488	0.92877	null	null	51223
GO:0051454	intracellular pH elevation	2.5977	0.000973572	0.853828	0.355842	-3.05726	-4.64394	null
GO:0051851	modulation by host of symbiont process	3.68931	0.0120501	0.981207	0	-5.38839	5.16719	null
GO:0048874	host-mediated regulation of intestinal microbiota composition	2.43136	0.000663015	0.940844	0.845471	null	null	51851
GO:0051896	regulation of phosphatidylinositol 3-kinase/protein kinase B signal transduction	4.3865	0.060014	0.732936	0.152402	5.5624	3.40197	null
GO:0043408	regulation of MAPK cascade	5.13261	0.334487	0.704174	0.692529	null	null	51896
GO:0043410	positive regulation of MAPK cascade	4.81973	0.162739	0.621606	0.845975	null	null	51896
GO:0051897	positive regulation of phosphatidylinositol 3-kinase/protein kinase B signal transduction	4.03846	0.0269273	0.658954	0.590761	null	null	51896
GO:0070304	positive regulation of stress-activated protein kinase signaling cascade	3.31218	0.00505518	0.674884	0.524818	null	null	51896
GO:0070372	regulation of ERK1 and ERK2 cascade	4.56362	0.0902366	0.724422	0.71475	null	null	51896
GO:0070374	positive regulation of ERK1 and ERK2 cascade	4.3966	0.0614263	0.642039	0.788758	null	null	51896
GO:1902533	positive regulation of intracellular signal transduction	5.27394	0.463135	0.599377	0.820304	null	null	51896
GO:0055117	regulation of cardiac muscle contraction	3.95742	0.0223429	0.766495	0.10824	1.50483	-0.0315597	null
GO:0001817	regulation of cytokine production	4.87554	0.185058	0.711069	0.617703	null	null	55117
GO:0001819	positive regulation of cytokine production	4.70184	0.124053	0.615926	0.816477	null	null	55117
GO:0002694	regulation of leukocyte activation	4.91009	0.200378	0.628742	0.903167	null	null	55117
GO:0006942	regulation of striated muscle contraction	4.07022	0.0289706	0.763203	0.902081	null	null	55117
GO:0010543	regulation of platelet activation	3.61794	0.0102237	0.760692	0.516033	null	null	55117
GO:0010574	regulation of vascular endothelial growth factor production	3.46494	0.00718718	0.754749	0.5059	null	null	55117
GO:0010575	positive regulation of vascular endothelial growth factor production	3.44731	0.00690127	0.67069	0.656905	null	null	55117
GO:0030888	regulation of B cell proliferation	3.94778	0.0218524	0.628668	0.881144	null	null	55117
GO:0032652	regulation of interleukin-1 production	3.83321	0.0167849	0.743771	0.688925	null	null	55117
GO:0033003	regulation of mast cell activation	3.18298	0.0037538	0.698207	0.636018	null	null	55117
GO:0050866	negative regulation of cell activation	4.37983	0.0590995	0.705545	0.741491	null	null	55117
GO:0050869	negative regulation of B cell activation	3.62242	0.0103297	0.653442	0.741951	null	null	55117
GO:0051240	positive regulation of multicellular organismal process	5.28237	0.47221	0.61823	0.779499	null	null	55117
GO:0070198	protein localization to chromosome, telomeric region	3.26482	0.00453266	0.984517	0	-6.74975	2.04494	null
GO:0070199	establishment of protein localization to chromosome	3.7558	0.0140441	0.983949	0.793929	null	null	70198
GO:0070200	establishment of protein localization to telomere	2.43457	0.000667945	0.985423	0.683604	null	null	70198
GO:0070528	protein kinase C signaling	3.1486	0.00346789	0.801245	0.170974	0.971556	5.81798	null
GO:0071468	cellular response to acidic pH	2.86392	0.00179926	0.94038	0.00503593	0.574952	7.80127	null
GO:0072676	lymphocyte migration	3.59923	0.00979241	0.908234	0.00547955	-4.8613	0.840716	null
GO:0002548	monocyte chemotaxis	3.23045	0.00418759	0.848144	0.911183	null	null	72676
GO:0030593	neutrophil chemotaxis	3.72795	0.0131716	0.840007	0.92588	null	null	72676
GO:0048245	eosinophil chemotaxis	3.7145	0.0127698	0.840264	0.861801	null	null	72676
GO:0048246	macrophage chemotaxis	3.44467	0.00685937	0.846046	0.790665	null	null	72676
GO:0048247	lymphocyte chemotaxis	3.07115	0.002901	0.852079	0.894187	null	null	72676
GO:0060326	cell chemotaxis	4.67998	0.117962	0.860655	0.662394	null	null	72676
GO:0071621	granulocyte chemotaxis	4.00839	0.0251256	0.834557	0.959475	null	null	72676
GO:0072677	eosinophil migration	3.71759	0.012861	0.905398	0.911298	null	null	72676
GO:1905517	macrophage migration	3.48883	0.00759386	0.908549	0.83372	null	null	72676
GO:1990266	neutrophil migration	3.81451	0.0160775	0.904332	0.923161	null	null	72676
GO:0090199	regulation of release of cytochrome c from mitochondria	3.55242	0.00879173	0.828249	0.102761	5.54768	5.44517	null
GO:0010823	negative regulation of mitochondrion organization	3.86764	0.0181701	0.783618	0.821893	null	null	90199
GO:0045840	positive regulation of mitotic nuclear division	4.16912	0.0363796	0.700062	0.82803	null	null	90199
GO:0051785	positive regulation of nuclear division	4.3328	0.0530338	0.710815	0.546153	null	null	90199
GO:0090201	negative regulation of release of cytochrome c from mitochondria	2.88081	0.00187074	0.727476	0.729509	null	null	90199
GO:1900125	regulation of hyaluronan biosynthetic process	2.53782	0.000847871	0.83715	0	5.51378	-4.34333	null
GO:0045913	positive regulation of carbohydrate metabolic process	3.48897	0.00759633	0.736599	0.618933	null	null	1900125
GO:1900373	positive regulation of purine nucleotide biosynthetic process	2.36736	0.00057182	0.72828	0.181769	4.68884	-3.35782	null
GO:1902894	negative regulation of miRNA transcription	2.97081	0.00230207	0.787478	0.319496	6.18915	-3.01059	null
GO:1902895	positive regulation of miRNA transcription	3.45301	0.00699247	0.719541	0.925153	null	null	1902894
GO:2000629	negative regulation of miRNA metabolic process	2.99957	0.00245981	0.787777	0.817825	null	null	1902894
GO:1904705	regulation of vascular associated smooth muscle cell proliferation	3.26174	0.00450062	0.799781	0.106408	-0.353299	1.68239	null
GO:0008284	positive regulation of cell population proliferation	4.99328	0.242688	0.652165	0.859215	null	null	1904705
GO:0008285	negative regulation of cell population proliferation	4.71101	0.1267	0.730094	0.693101	null	null	1904705
GO:0030889	negative regulation of B cell proliferation	3.40278	0.0062284	0.628351	0.911631	null	null	1904705
GO:0048145	regulation of fibroblast proliferation	3.57715	0.00930686	0.797457	0.565312	null	null	1904705
GO:0048146	positive regulation of fibroblast proliferation	3.42521	0.00655867	0.713982	0.576567	null	null	1904705
GO:0048660	regulation of smooth muscle cell proliferation	3.67228	0.0115867	0.795128	0.594453	null	null	1904705
GO:0048661	positive regulation of smooth muscle cell proliferation	3.32077	0.00515624	0.712978	0.911606	null	null	1904705
GO:0050672	negative regulation of lymphocyte proliferation	4.07788	0.0294857	0.599544	0.893428	null	null	1904705
GO:0050680	negative regulation of epithelial cell proliferation	3.87035	0.0182834	0.754776	0.713794	null	null	1904705
GO:0070664	negative regulation of leukocyte proliferation	4.08558	0.0300131	0.744239	0.797053	null	null	1904705
GO:0070665	positive regulation of leukocyte proliferation	4.2589	0.044735	0.677819	0.916965	null	null	1904705
GO:1904707	positive regulation of vascular associated smooth muscle cell proliferation	3.01368	0.00254115	0.722588	0.880276	null	null	1904705
GO:1905063	regulation of vascular associated smooth muscle cell differentiation	2.68664	0.0011954	0.822631	0.0934534	-1.72152	-0.516037	null
GO:0045667	regulation of osteoblast differentiation	3.88559	0.0189366	0.803216	0.545211	null	null	1905063
GO:0045668	negative regulation of osteoblast differentiation	3.28511	0.00474955	0.780035	0.58581	null	null	1905063
GO:0045669	positive regulation of osteoblast differentiation	3.64098	0.0107808	0.711915	0.897872	null	null	1905063
GO:0051151	negative regulation of smooth muscle cell differentiation	3.10823	0.0031598	0.781429	0.923314	null	null	1905063
GO:1905064	negative regulation of vascular associated smooth muscle cell differentiation	2.43616	0.000670409	0.796347	0.861738	null	null	1905063
GO:1990858	cellular response to lectin	3.01326	0.00253868	0.933925	0.167852	-2.47806	5.52834	null
GO:0002223	stimulatory C-type lectin receptor signaling pathway	3.01284	0.00253622	0.544813	0.999929	null	null	1990858
GO:2000278	regulation of DNA biosynthetic process	3.8811	0.0187419	0.805643	0.173656	5.65522	-1.50185	null
GO:0051054	positive regulation of DNA metabolic process	4.53237	0.0839712	0.68637	0.745563	null	null	2000278
GO:2000573	positive regulation of DNA biosynthetic process	3.21059	0.00400027	0.73232	0.624252	null	null	2000278
GO:2000668	regulation of dendritic cell apoptotic process	2.96379	0.0022651	0.834906	0.0920185	0.649554	-2.46049	null
GO:0002902	regulation of B cell apoptotic process	3.09342	0.00305381	0.832535	0.909707	null	null	2000668
GO:0070228	regulation of lymphocyte apoptotic process	3.58625	0.00950404	0.822878	0.896088	null	null	2000668
GO:2000108	positive regulation of leukocyte apoptotic process	3.40773	0.00629988	0.73337	0.9445	null	null	2000668
GO:2000772	regulation of cellular senescence	3.2014	0.00391647	0.830769	0.149024	7.22269	-1.47332	null
GO:2000773	negative regulation of cellular senescence	2.91328	0.00201616	0.800825	0.155183	6.73443	-2.95027	null

## Sheet: C. Colitis only
TermID	Name	LogSize	Frequency	Uniqueness	Dispensability	PC_0	PC_1	Representative
GO:0000041	transition metal ion transport	5.58755	0.95349	0.995845	0	-5.76427	1.42616	null
GO:0002320	lymphoid progenitor cell differentiation	2.62325	0.00103273	0.96678	0.00715107	1.48099	6.66863	null
GO:0002573	myeloid leukocyte differentiation	4.32094	0.0516043	0.959274	0.662048	null	null	2320
GO:1903131	mononuclear cell differentiation	4.51224	0.0801681	0.958368	0.935356	null	null	2320
GO:0003180	aortic valve morphogenesis	2.9952	0.00243516	0.960787	0.290151	0.952567	6.58219	null
GO:0003176	aortic valve development	3.07041	0.00289607	0.960505	0.974841	null	null	3180
GO:0006357	regulation of transcription by RNA polymerase II	6.23039	4.18945	0.707343	0.373088	5.41459	-0.696047	null
GO:0006355	regulation of DNA-templated transcription	6.65155	11.0489	0.680932	0.728916	null	null	6357
GO:0006468	protein phosphorylation	5.61472	1.01505	0.979939	0.260652	-2.63115	5.20387	null
GO:0016310	phosphorylation	6.32718	5.23538	0.984822	0.512431	null	null	6468
GO:0006915	apoptotic process	5.20733	0.397284	0.971127	0.0119965	-4.92415	3.49928	null
GO:0008625	extrinsic apoptotic signaling pathway via death domain receptors	3.71659	0.0128314	0.741465	0.737895	null	null	6915
GO:0008630	intrinsic apoptotic signaling pathway in response to DNA damage	4.1494	0.0347652	0.712683	0.792405	null	null	6915
GO:0006954	inflammatory response	4.78525	0.15032	0.875047	0.284917	-0.504959	-7.41939	null
GO:0000302	response to reactive oxygen species	5.03459	0.266907	0.8368	0.531733	null	null	6954
GO:0006974	DNA damage response	6.12098	3.25653	0.846348	0.500973	null	null	6954
GO:0019730	antimicrobial humoral response	3.99506	0.0243664	0.815173	0.594429	null	null	6954
GO:0042832	defense response to protozoan	3.22583	0.00414323	0.866658	0.530953	null	null	6954
GO:0061844	antimicrobial humoral immune response mediated by antimicrobial peptide	3.72387	0.0130483	0.821338	0.847834	null	null	6954
GO:0071456	cellular response to hypoxia	4.02995	0.0264048	0.845811	0.501473	null	null	6954
GO:0140546	defense response to symbiont	5.35691	0.56063	0.821224	0.753966	null	null	6954
GO:1901701	cellular response to oxygen-containing compound	5.43468	0.670579	0.819902	0.810873	null	null	6954
GO:0015908	fatty acid transport	4.73474	0.133813	0.994209	0.243742	-5.14602	1.23782	null
GO:0034504	protein localization to nucleus	5.05339	0.278715	0.990523	0.440591	null	null	15908
GO:0016052	carbohydrate catabolic process	5.84556	1.72716	0.987487	0.0711546	-6.16139	-0.732406	null
GO:0006096	glycolytic process	5.267	0.455795	0.97591	0.606628	null	null	16052
GO:0030163	protein catabolic process	5.8996	1.95602	0.981429	0.546543	null	null	16052
GO:0030003	intracellular monoatomic cation homeostasis	5.64132	1.07916	0.995507	0	-4.68847	-5.53434	null
GO:0030277	maintenance of gastrointestinal epithelium	3.38202	0.00593756	0.982507	0.530779	null	null	30003
GO:0030330	DNA damage response, signal transduction by p53 class mediator	3.66436	0.0113772	0.737791	0.354901	1.29712	-5.99835	null
GO:0042771	intrinsic apoptotic signaling pathway in response to DNA damage by p53 class mediator	3.68681	0.0119811	0.724758	0.916593	null	null	30330
GO:0072332	intrinsic apoptotic signaling pathway by p53 class mediator	3.83385	0.0168095	0.73229	0.913926	null	null	30330
GO:0031638	zymogen activation	4.1262	0.032956	0.988498	0.00934755	-2.0606	5.53694	null
GO:0032965	regulation of collagen biosynthetic process	2.92324	0.00206299	0.819522	0.103173	7.55292	2.58558	null
GO:0010714	positive regulation of collagen metabolic process	2.86273	0.00179433	0.716362	0.974801	null	null	32965
GO:0032967	positive regulation of collagen biosynthetic process	2.84323	0.00171546	0.712673	0.972787	null	null	32965
GO:0034097	response to cytokine	5.10335	0.312689	0.830937	0.215125	-1.28789	-7.05652	null
GO:0006986	response to unfolded protein	4.83379	0.168095	0.824893	0.648724	null	null	34097
GO:0019221	cytokine-mediated signaling pathway	4.99308	0.242575	0.635167	0.969122	null	null	34097
GO:0031663	lipopolysaccharide-mediated signaling pathway	3.74958	0.0138444	0.671535	0.896628	null	null	34097
GO:0032496	response to lipopolysaccharide	4.40147	0.0621188	0.802498	0.980136	null	null	34097
GO:0032870	cellular response to hormone stimulus	5.34175	0.541402	0.793115	0.768692	null	null	34097
GO:0033209	tumor necrosis factor-mediated signaling pathway	4.15667	0.0353518	0.673411	0.967525	null	null	34097
GO:0034341	response to type II interferon	3.77181	0.0145715	0.769933	0.653879	null	null	34097
GO:0034612	response to tumor necrosis factor	4.35199	0.0554295	0.83049	0.764555	null	null	34097
GO:0070098	chemokine-mediated signaling pathway	4.32919	0.0525951	0.665838	0.998317	null	null	34097
GO:0070555	response to interleukin-1	3.80713	0.0158064	0.842493	0.543102	null	null	34097
GO:0071219	cellular response to molecule of bacterial origin	4.34719	0.0548208	0.804434	0.593976	null	null	34097
GO:0071345	cellular response to cytokine stimulus	5.07016	0.289683	0.797899	0.861895	null	null	34097
GO:0071346	cellular response to type II interferon	3.49024	0.00761851	0.772417	0.630625	null	null	34097
GO:0071347	cellular response to interleukin-1	3.66172	0.0113082	0.833572	0.644586	null	null	34097
GO:0071356	cellular response to tumor necrosis factor	4.33246	0.0529919	0.816401	0.705686	null	null	34097
GO:0071396	cellular response to lipid	4.93178	0.210642	0.814751	0.660992	null	null	34097
GO:1990869	cellular response to chemokine	4.33672	0.0535144	0.816213	0.773057	null	null	34097
GO:0036336	dendritic cell migration	2.67302	0.00115843	0.902847	0.00720724	-4.09986	-1.77454	null
GO:0002407	dendritic cell chemotaxis	2.45637	0.000702451	0.811915	0.757443	null	null	36336
GO:0002548	monocyte chemotaxis	3.23045	0.00418759	0.793831	0.911183	null	null	36336
GO:0030593	neutrophil chemotaxis	3.72795	0.0131716	0.78393	0.92588	null	null	36336
GO:0048245	eosinophil chemotaxis	3.7145	0.0127698	0.784284	0.911298	null	null	36336
GO:0048246	macrophage chemotaxis	3.44467	0.00685937	0.791969	0.83372	null	null	36336
GO:0048247	lymphocyte chemotaxis	3.07115	0.002901	0.798835	0.894187	null	null	36336
GO:0071621	granulocyte chemotaxis	4.00839	0.0251256	0.776389	0.959475	null	null	36336
GO:0072676	lymphocyte migration	3.59923	0.00979241	0.892763	0.854335	null	null	36336
GO:0072677	eosinophil migration	3.71759	0.012861	0.891746	0.862133	null	null	36336
GO:1905517	macrophage migration	3.48883	0.00759386	0.895258	0.713583	null	null	36336
GO:1990266	neutrophil migration	3.81451	0.0160775	0.890544	0.923161	null	null	36336
GO:0042127	regulation of cell population proliferation	5.2302	0.418764	0.797759	0.154748	4.403	-2.81379	null
GO:0042981	regulation of apoptotic process	5.39241	0.608384	0.710484	0.20236	3.95432	-0.72813	null
GO:0043065	positive regulation of apoptotic process	4.9079	0.199373	0.597266	0.890435	null	null	42981
GO:0043066	negative regulation of apoptotic process	5.06879	0.288774	0.696643	0.920562	null	null	42981
GO:0043068	positive regulation of programmed cell death	4.92289	0.206373	0.601442	0.893157	null	null	42981
GO:0043069	negative regulation of programmed cell death	5.08012	0.296405	0.698879	0.92276	null	null	42981
GO:0043523	regulation of neuron apoptotic process	4.18825	0.0380186	0.757232	0.77673	null	null	42981
GO:0043524	negative regulation of neuron apoptotic process	4.02057	0.0258403	0.738086	0.754286	null	null	42981
GO:0070228	regulation of lymphocyte apoptotic process	3.58625	0.00950404	0.769625	0.70176	null	null	42981
GO:0070232	regulation of T cell apoptotic process	3.42012	0.00648227	0.774011	0.945926	null	null	42981
GO:0070234	positive regulation of T cell apoptotic process	2.94939	0.00219115	0.680418	0.8946	null	null	42981
GO:1904037	positive regulation of epithelial cell apoptotic process	3.32818	0.00524497	0.667592	0.922677	null	null	42981
GO:2000351	regulation of endothelial cell apoptotic process	3.69522	0.0122153	0.766766	0.71424	null	null	42981
GO:2000353	positive regulation of endothelial cell apoptotic process	3.20493	0.00394851	0.67231	0.908997	null	null	42981
GO:2001233	regulation of apoptotic signaling pathway	4.75085	0.138871	0.668154	0.862869	null	null	42981
GO:2001234	negative regulation of apoptotic signaling pathway	4.51721	0.08109	0.652739	0.888306	null	null	42981
GO:2001235	positive regulation of apoptotic signaling pathway	4.3449	0.0545324	0.573466	0.898709	null	null	42981
GO:2001236	regulation of extrinsic apoptotic signaling pathway	4.27487	0.0464111	0.684028	0.788855	null	null	42981
GO:2001237	negative regulation of extrinsic apoptotic signaling pathway	4.1293	0.0331927	0.669338	0.837722	null	null	42981
GO:2001238	positive regulation of extrinsic apoptotic signaling pathway	3.61763	0.0102163	0.60961	0.892097	null	null	42981
GO:0043067	regulation of programmed cell death	5.40566	0.62723	0.791694	0.195194	5.18356	-2.11501	null
GO:0043087	regulation of GTPase activity	2.74663	0.00137286	0.792415	0.0956282	-2.14898	1.38938	null
GO:0010950	positive regulation of endopeptidase activity	2.42651	0.000655621	0.656508	0.966843	null	null	43087
GO:0010952	positive regulation of peptidase activity	2.46835	0.000722169	0.655116	0.961597	null	null	43087
GO:0032088	negative regulation of NF-kappaB transcription factor activity	2.24055	0.0004264	0.770938	0.888515	null	null	43087
GO:0043405	regulation of MAP kinase activity	2.4624	0.00071231	0.7463	0.708981	null	null	43087
GO:0043407	negative regulation of MAP kinase activity	1.99123	0.00023908	0.668796	0.909675	null	null	43087
GO:0043433	negative regulation of DNA-binding transcription factor activity	2.48001	0.000741887	0.765319	0.699264	null	null	43087
GO:0043547	positive regulation of GTPase activity	2.55871	0.000889771	0.795507	0.897987	null	null	43087
GO:0051091	positive regulation of DNA-binding transcription factor activity	2.75664	0.0014049	0.760777	0.934607	null	null	43087
GO:0051092	positive regulation of NF-kappaB transcription factor activity	2.53148	0.000835547	0.766324	0.939467	null	null	43087
GO:0051345	positive regulation of hydrolase activity	2.93044	0.00209749	0.788181	0.93304	null	null	43087
GO:0052547	regulation of peptidase activity	2.72263	0.00129892	0.74488	0.913122	null	null	43087
GO:0052548	regulation of endopeptidase activity	2.67578	0.00116582	0.744233	0.981688	null	null	43087
GO:0071901	negative regulation of protein serine/threonine kinase activity	2.233	0.000419006	0.726701	0.930736	null	null	43087
GO:2000116	regulation of cysteine-type endopeptidase activity	2.58771	0.00095139	0.746502	0.900629	null	null	43087
GO:0043933	protein-containing complex organization	6.19389	3.8518	0.992657	0	-6.09094	-2.70251	null
GO:0044087	regulation of cellular component biogenesis	5.40722	0.629487	0.791638	0.20304	3.8521	-1.74011	null
GO:0045428	regulation of nitric oxide biosynthetic process	3.61868	0.010241	0.797012	0.184311	7.88971	-0.510133	null
GO:0045429	positive regulation of nitric oxide biosynthetic process	3.57334	0.00922552	0.679447	0.971135	null	null	45428
GO:1904407	positive regulation of nitric oxide metabolic process	3.57749	0.00931425	0.689736	0.971639	null	null	45428
GO:0045662	negative regulation of myoblast differentiation	3.00604	0.00249678	0.800895	0.11173	5.11197	4.39357	null
GO:0046890	regulation of lipid biosynthetic process	4.40446	0.0625477	0.794525	0.202802	6.45144	0.987513	null
GO:0048145	regulation of fibroblast proliferation	3.57715	0.00930686	0.802563	0.120321	5.49331	-6.41481	null
GO:0001937	negative regulation of endothelial cell proliferation	3.60271	0.00987128	0.775862	0.703747	null	null	48145
GO:0008284	positive regulation of cell population proliferation	4.99328	0.242688	0.619616	0.859215	null	null	48145
GO:0008285	negative regulation of cell population proliferation	4.71101	0.1267	0.742262	0.693101	null	null	48145
GO:0048147	negative regulation of fibroblast proliferation	3.04258	0.00271614	0.79038	0.550891	null	null	48145
GO:0048660	regulation of smooth muscle cell proliferation	3.67228	0.0115867	0.800193	0.594453	null	null	48145
GO:0048662	negative regulation of smooth muscle cell proliferation	3.39076	0.00605833	0.781584	0.658846	null	null	48145
GO:0051851	modulation by host of symbiont process	3.68931	0.0120501	0.945419	0	-4.99654	-4.02367	null
GO:0043922	negative regulation by host of viral transcription	2.69197	0.00121019	0.951	0.870475	null	null	51851
GO:0051607	defense response to virus	4.84597	0.172874	0.831387	0.834288	null	null	51851
GO:0098586	cellular response to virus	3.91508	0.0202676	0.865503	0.5004	null	null	51851
GO:0060429	epithelium development	5.12196	0.326381	0.958944	0.392309	1.84577	6.6871	null
GO:0002062	chondrocyte differentiation	3.88711	0.0190031	0.955618	0.692711	null	null	60429
GO:0003197	endocardial cushion development	3.23121	0.00419499	0.958223	0.703078	null	null	60429
GO:0003203	endocardial cushion morphogenesis	3.11826	0.00323374	0.95872	0.616344	null	null	60429
GO:0030855	epithelial cell differentiation	4.83065	0.166883	0.955531	0.816885	null	null	60429
GO:0061136	regulation of proteasomal protein catabolic process	5.00553	0.249631	0.727116	0.253045	6.22184	-0.0108359	null
GO:0001819	positive regulation of cytokine production	4.70184	0.124053	0.575682	0.780559	null	null	61136
GO:0001932	regulation of protein phosphorylation	4.87395	0.18438	0.723454	0.619894	null	null	61136
GO:0001934	positive regulation of protein phosphorylation	4.76634	0.143914	0.60178	0.965468	null	null	61136
GO:0031401	positive regulation of protein modification process	4.93426	0.211847	0.605182	0.919777	null	null	61136
GO:0032481	positive regulation of type I interferon production	4.32883	0.0525507	0.592239	0.8819	null	null	61136
GO:0042176	regulation of protein catabolic process	5.11439	0.320746	0.734241	0.794971	null	null	61136
GO:0042327	positive regulation of phosphorylation	4.78478	0.150157	0.622732	0.981485	null	null	61136
GO:0045727	positive regulation of translation	4.74077	0.135686	0.605274	0.604802	null	null	61136
GO:0045732	positive regulation of protein catabolic process	4.97912	0.2349	0.606324	0.950277	null	null	61136
GO:0051247	positive regulation of protein metabolic process	5.36783	0.574903	0.592022	0.683109	null	null	61136
GO:1903050	regulation of proteolysis involved in protein catabolic process	5.0203	0.258265	0.729866	0.960269	null	null	61136
GO:0070371	ERK1 and ERK2 cascade	3.2408	0.00428865	0.76397	0.162748	1.8519	-6.56982	null
GO:0000165	MAPK cascade	4.76195	0.142467	0.71177	0.677556	null	null	70371
GO:0007249	canonical NF-kappaB signal transduction	4.17161	0.0365891	0.734541	0.567198	null	null	70371
GO:0019935	cyclic-nucleotide-mediated signaling	4.3108	0.0504138	0.7295	0.618156	null	null	70371
GO:0038061	non-canonical NF-kappaB signal transduction	3.38417	0.00596714	0.759868	0.484493	null	null	70371
GO:0043491	phosphatidylinositol 3-kinase/protein kinase B signal transduction	3.70586	0.0125184	0.750127	0.512229	null	null	70371
GO:0071675	regulation of mononuclear cell migration	3.98254	0.0236738	0.740441	0.127265	7.11341	-4.47414	null
GO:0002819	regulation of adaptive immune response	4.25295	0.0441262	0.69006	0.634894	null	null	71675
GO:0002888	positive regulation of myeloid leukocyte mediated immunity	3.2014	0.00391647	0.685125	0.551763	null	null	71675
GO:0042102	positive regulation of T cell proliferation	4.10185	0.0311592	0.569387	0.978287	null	null	71675
GO:0042129	regulation of T cell proliferation	4.30384	0.0496128	0.652832	0.897685	null	null	71675
GO:0045621	positive regulation of lymphocyte differentiation	3.92059	0.0205264	0.593167	0.887843	null	null	71675
GO:0045622	regulation of T-helper cell differentiation	3.40192	0.00621607	0.648786	0.784226	null	null	71675
GO:0046006	regulation of activated T cell proliferation	3.30685	0.00499356	0.69201	0.773913	null	null	71675
GO:0050671	positive regulation of lymphocyte proliferation	4.24376	0.043202	0.565748	0.948612	null	null	71675
GO:0050863	regulation of T cell activation	4.67752	0.117297	0.665927	0.705092	null	null	71675
GO:0050871	positive regulation of B cell activation	4.05046	0.0276815	0.600356	0.862627	null	null	71675
GO:0051240	positive regulation of multicellular organismal process	5.28237	0.47221	0.594045	0.750134	null	null	71675
GO:0051251	positive regulation of lymphocyte activation	4.6645	0.113832	0.568424	0.9528	null	null	71675
GO:0071677	positive regulation of mononuclear cell migration	3.8355	0.0168736	0.640425	0.936727	null	null	71675
GO:0140131	positive regulation of lymphocyte chemotaxis	3.08386	0.00298727	0.625481	0.911367	null	null	71675
GO:2000403	positive regulation of lymphocyte migration	3.59262	0.00964453	0.649265	0.967417	null	null	71675
GO:2000404	regulation of T cell migration	3.64167	0.010798	0.746641	0.868627	null	null	71675
GO:2000406	positive regulation of T cell migration	3.51706	0.00810407	0.652132	0.958343	null	null	71675
GO:2000501	regulation of natural killer cell chemotaxis	2.34044	0.000537313	0.733147	0.74138	null	null	71675
GO:0071774	response to fibroblast growth factor	4.3249	0.0520775	0.893883	0.154892	-1.94395	-6.5799	null
GO:0071363	cellular response to growth factor stimulus	4.92473	0.20725	0.883931	0.900469	null	null	71774
GO:0071772	response to BMP	4.35338	0.055607	0.893464	0.817856	null	null	71774
GO:0097066	response to thyroid hormone	3.18893	0.00380556	0.860065	0.509953	null	null	71774
GO:0097067	cellular response to thyroid hormone stimulus	3.15927	0.00355416	0.847336	0.507995	null	null	71774
GO:0072331	signal transduction by p53 class mediator	4.08019	0.0296434	0.74542	0.335856	1.92654	-5.37538	null
GO:0090189	regulation of branching involved in ureteric bud morphogenesis	3.15045	0.00348268	0.770138	0.396063	5.22767	4.96749	null
GO:0030278	regulation of ossification	3.94758	0.0218425	0.761693	0.485681	null	null	90189
GO:0030858	positive regulation of epithelial cell differentiation	3.36624	0.00572559	0.664881	0.576995	null	null	90189
GO:0032480	negative regulation of type I interferon production	3.31681	0.00510941	0.710538	0.754805	null	null	90189
GO:0032648	regulation of interferon-beta production	3.32613	0.00522032	0.73593	0.63774	null	null	90189
GO:0032653	regulation of interleukin-10 production	3.33666	0.00534849	0.739101	0.497089	null	null	90189
GO:0032688	negative regulation of interferon-beta production	2.69197	0.00121019	0.728528	0.703482	null	null	90189
GO:0032728	positive regulation of interferon-beta production	3.18526	0.00377352	0.643329	0.916894	null	null	90189
GO:0032733	positive regulation of interleukin-10 production	3.23553	0.00423689	0.645754	0.631052	null	null	90189
GO:0032735	positive regulation of interleukin-12 production	3.33885	0.0053756	0.641531	0.671745	null	null	90189
GO:0051093	negative regulation of developmental process	4.94196	0.21564	0.755256	0.50371	null	null	90189
GO:0061035	regulation of cartilage development	3.76462	0.0143325	0.753585	0.55125	null	null	90189
GO:0061036	positive regulation of cartilage development	3.49164	0.00764316	0.661996	0.586089	null	null	90189
GO:0120162	positive regulation of cold-induced thermogenesis	3.48799	0.00757908	0.654839	0.50676	null	null	90189
GO:1905332	positive regulation of morphogenesis of an epithelium	3.2982	0.00489497	0.711722	0.890993	null	null	90189
GO:0090199	regulation of release of cytochrome c from mitochondria	3.55242	0.00879173	0.815127	0.119922	0.363412	-1.86805	null
GO:0030516	regulation of axon extension	4.34465	0.0545003	0.767731	0.611701	null	null	90199
GO:0031334	positive regulation of protein-containing complex assembly	4.49178	0.0764784	0.659971	0.780613	null	null	90199
GO:0043254	regulation of protein-containing complex assembly	5.121	0.325661	0.771846	0.537629	null	null	90199
GO:0051130	positive regulation of cellular component organization	5.25738	0.445805	0.625438	0.727104	null	null	90199
GO:0090200	positive regulation of release of cytochrome c from mitochondria	3.44311	0.00683472	0.701462	0.779441	null	null	90199
GO:0090279	regulation of calcium ion import	3.31133	0.00504532	0.815724	0.108379	1.97139	3.30415	null
GO:0010874	regulation of cholesterol efflux	3.30471	0.00496892	0.813103	0.501133	null	null	90279
GO:0010875	positive regulation of cholesterol efflux	2.94645	0.00217637	0.712716	0.982788	null	null	90279
GO:0010883	regulation of lipid storage	3.97653	0.0233485	0.806025	0.511667	null	null	90279
GO:0032376	positive regulation of cholesterol transport	3.1038	0.00312776	0.707597	0.901496	null	null	90279
GO:0033157	regulation of intracellular protein transport	4.17105	0.0365422	0.790501	0.573909	null	null	90279
GO:0043270	positive regulation of monoatomic ion transport	3.96478	0.0227249	0.680616	0.704859	null	null	90279
GO:0045807	positive regulation of endocytosis	4.00741	0.0250689	0.654865	0.744356	null	null	90279
GO:0050766	positive regulation of phagocytosis	3.57124	0.00918116	0.670744	0.832648	null	null	90279
GO:0051928	positive regulation of calcium ion transport	3.56972	0.00914912	0.694901	0.810754	null	null	90279
GO:2000425	regulation of apoptotic cell clearance	2.4609	0.000709845	0.808017	0.456298	null	null	90279
GO:2000427	positive regulation of apoptotic cell clearance	2.26007	0.000446118	0.715343	0.728485	null	null	90279
GO:0140467	integrated stress response signaling	2.85309	0.00175489	0.905289	0.00741795	0.138712	-7.90963	null
GO:1900744	regulation of p38MAPK cascade	3.6131	0.0101104	0.751707	0.120906	1.37719	0.332598	null
GO:0002224	toll-like receptor signaling pathway	4.15241	0.0350067	0.486802	0.918644	null	null	1900744
GO:0002756	MyD88-independent toll-like receptor signaling pathway	3.27231	0.00461153	0.535299	0.793888	null	null	1900744
GO:0009967	positive regulation of signal transduction	5.44457	0.686023	0.558674	0.820421	null	null	1900744
GO:0031349	positive regulation of defense response	4.68352	0.118926	0.612589	0.859773	null	null	1900744
GO:0032874	positive regulation of stress-activated MAPK cascade	3.31175	0.00505025	0.655052	0.651378	null	null	1900744
GO:0035666	TRIF-dependent toll-like receptor signaling pathway	3.24155	0.00429604	0.536842	0.687086	null	null	1900744
GO:0043122	regulation of canonical NF-kappaB signal transduction	4.78495	0.150214	0.716677	0.708059	null	null	1900744
GO:0043124	negative regulation of canonical NF-kappaB signal transduction	4.30788	0.0500761	0.709356	0.644244	null	null	1900744
GO:0043409	negative regulation of MAPK cascade	4.60403	0.0990357	0.690822	0.815808	null	null	1900744
GO:0043410	positive regulation of MAPK cascade	4.81973	0.162739	0.587028	0.851877	null	null	1900744
GO:0045089	positive regulation of innate immune response	4.5952	0.0970417	0.569347	0.840181	null	null	1900744
GO:0050727	regulation of inflammatory response	4.54506	0.0864606	0.731706	0.44375	null	null	1900744
GO:0070372	regulation of ERK1 and ERK2 cascade	4.56362	0.0902366	0.718301	0.700964	null	null	1900744
GO:0070374	positive regulation of ERK1 and ERK2 cascade	4.3966	0.0614263	0.609273	0.788758	null	null	1900744
GO:1900745	positive regulation of p38MAPK cascade	3.35717	0.00560728	0.656918	0.598398	null	null	1900744
GO:1901222	regulation of non-canonical NF-kappaB signal transduction	4.10065	0.031073	0.742616	0.619971	null	null	1900744
GO:1902531	regulation of intracellular signal transduction	5.61518	1.01614	0.685573	0.619468	null	null	1900744
GO:1902532	negative regulation of intracellular signal transduction	5.0857	0.30024	0.676728	0.755219	null	null	1900744
GO:1902533	positive regulation of intracellular signal transduction	5.27394	0.463135	0.564685	0.932925	null	null	1900744
GO:1901566	organonitrogen compound biosynthetic process	6.75726	14.0938	0.989356	0.287977	-3.00305	4.67478	null
GO:1902893	regulation of miRNA transcription	3.54045	0.00855265	0.802838	0.16666	7.66071	0.607603	null
GO:1902895	positive regulation of miRNA transcription	3.45301	0.00699247	0.686077	0.962675	null	null	1902893
GO:1903039	positive regulation of leukocyte cell-cell adhesion	4.55505	0.0884718	0.670499	0.164623	6.80539	-2.95646	null
GO:0009891	positive regulation of biosynthetic process	5.9357	2.12555	0.578221	0.783594	null	null	1903039
GO:0009893	positive regulation of metabolic process	6.06611	2.86999	0.586638	0.548162	null	null	1903039
GO:0010557	positive regulation of macromolecule biosynthetic process	5.92904	2.09318	0.563372	0.942219	null	null	1903039
GO:0010604	positive regulation of macromolecule metabolic process	6.04128	2.71053	0.570768	0.924756	null	null	1903039
GO:0010628	positive regulation of gene expression	5.34253	0.542369	0.603634	0.661527	null	null	1903039
GO:0031328	positive regulation of cellular biosynthetic process	5.93418	2.11814	0.563719	0.976356	null	null	1903039
GO:0045893	positive regulation of DNA-templated transcription	5.80928	1.58872	0.567603	0.862953	null	null	1903039
GO:0045944	positive regulation of transcription by RNA polymerase II	5.63454	1.06246	0.580078	0.938497	null	null	1903039
GO:0050870	positive regulation of T cell activation	4.54627	0.0867022	0.569807	0.977111	null	null	1903039
GO:2000045	regulation of G1/S transition of mitotic cell cycle	4.20847	0.0398302	0.820854	0	5.40541	-4.6751	null
GO:2000134	negative regulation of G1/S transition of mitotic cell cycle	3.91519	0.0202725	0.797214	0.923802	null	null	2000045

## Sheet: D. Recovery only
TermID	Name	LogSize	Frequency	Uniqueness	Dispensability	PC_0	PC_1	Representative
GO:0001655	urogenital system development	3.94493	0.0217094	0.901805	0.324406	4.12979	4.17629	null
GO:0007399	nervous system development	5.72789	1.31723	0.878097	0.582203	null	null	1655
GO:0002449	lymphocyte mediated immunity	4.43559	0.0671962	0.988911	0	-0.389313	-7.58196	null
GO:0036230	granulocyte activation	3.63448	0.0106206	0.916014	0.56154	null	null	2449
GO:0002664	regulation of T cell tolerance induction	2.49136	0.000761605	0.849404	0.0699501	0.815113	-4.42384	null
GO:0002924	negative regulation of humoral immune response mediated by circulating immunoglobulin	3.41414	0.00639354	0.751722	0.991956	null	null	2664
GO:0030450	regulation of complement activation, classical pathway	3.40175	0.00621361	0.766602	0.987281	null	null	2664
GO:0045916	negative regulation of complement activation	3.54283	0.00859948	0.750835	0.541333	null	null	2664
GO:0045959	negative regulation of complement activation, classical pathway	3.39846	0.00616678	0.752136	0.9759	null	null	2664
GO:0050927	positive regulation of positive chemotaxis	3.65312	0.0110864	0.702047	0.995145	null	null	2664
GO:0050930	induction of positive chemotaxis	3.6289	0.010485	0.702856	0.760529	null	null	2664
GO:0060753	regulation of mast cell chemotaxis	3.48629	0.0075495	0.768128	0.479659	null	null	2664
GO:0006144	purine nucleobase metabolic process	5.09088	0.303838	0.918777	0.20078	5.93999	-1.76898	null
GO:0006206	pyrimidine nucleobase metabolic process	5.17993	0.372994	0.914368	0.869881	null	null	6144
GO:0006208	pyrimidine nucleobase catabolic process	4.45684	0.0705655	0.914381	0.758919	null	null	6144
GO:0046113	nucleobase catabolic process	4.81297	0.160225	0.912178	0.809794	null	null	6144
GO:0006929	substrate-dependent cell migration	2.82543	0.00164645	0.996622	0	1.84451	-6.89138	null
GO:0007167	enzyme-linked receptor protein signaling pathway	5.32635	0.522545	0.721315	0.345937	-4.37337	-1.24776	null
GO:0007169	transmembrane receptor protein tyrosine kinase signaling pathway	5.17832	0.371614	0.718995	0.730517	null	null	7167
GO:0038128	ERBB2 signaling pathway	3.15625	0.00352951	0.776276	0.511131	null	null	7167
GO:0038134	ERBB2-EGFR signaling pathway	2.52375	0.000820758	0.790566	0.708391	null	null	7167
GO:0010566	regulation of ketone biosynthetic process	3.29181	0.0048235	0.847016	0.0884148	-7.42392	2.52283	null
GO:0010749	regulation of nitric oxide mediated signal transduction	2.49415	0.000766534	0.81197	0.0947939	-7.9971	-3.07053	null
GO:0043518	negative regulation of DNA damage response, signal transduction by p53 class mediator	3.05729	0.0028098	0.762221	0.408159	null	null	10749
GO:1902165	regulation of intrinsic apoptotic signaling pathway in response to DNA damage by p53 class mediator	3.03342	0.00265945	0.750198	0.954749	null	null	10749
GO:1902166	negative regulation of intrinsic apoptotic signaling pathway in response to DNA damage by p53 class mediator	2.98767	0.00239326	0.739412	0.951452	null	null	10749
GO:1902254	negative regulation of intrinsic apoptotic signaling pathway by p53 class mediator	3.11227	0.00318937	0.736006	0.967875	null	null	10749
GO:0010838	positive regulation of keratinocyte proliferation	2.64738	0.00109188	0.776477	0.0963636	-2.18321	6.67304	null
GO:0018108	peptidyl-tyrosine phosphorylation	2.25527	0.000441188	0.94675	0.0912611	3.74172	-5.62568	null
GO:0007260	tyrosine phosphorylation of STAT protein	1.07918	2.71121e-05	0.786077	0.895197	null	null	18108
GO:0038083	peptidyl-tyrosine autophosphorylation	1.50515	7.64069e-05	0.949196	0.930309	null	null	18108
GO:0019935	cyclic-nucleotide-mediated signaling	4.3108	0.0504138	0.790086	0.208193	-4.29755	-2.17463	null
GO:0030212	hyaluronan metabolic process	3.9878	0.0239622	0.977746	0	5.06904	-3.71697	null
GO:0030878	thyroid gland development	3.1038	0.00312776	0.901773	0.39514	4.32587	4.53225	null
GO:0001823	mesonephros development	3.54158	0.00857483	0.866206	0.725488	null	null	30878
GO:0003337	mesenchymal to epithelial transition involved in metanephros morphogenesis	2.38561	0.000596467	0.855741	0.819632	null	null	30878
GO:0035850	epithelial cell differentiation involved in kidney development	3.44028	0.00679036	0.846284	0.909013	null	null	30878
GO:0048793	pronephros development	3.12057	0.00325099	0.871858	0.425175	null	null	30878
GO:0072073	kidney epithelium development	3.82898	0.0166222	0.852614	0.791016	null	null	30878
GO:0072202	cell differentiation involved in metanephros development	2.71349	0.00127181	0.861501	0.66141	null	null	30878
GO:0072234	metanephric nephron tubule development	2.70586	0.00124962	0.860868	0.846499	null	null	30878
GO:0033135	regulation of peptidyl-serine phosphorylation	4.01849	0.0257171	0.76037	0.198497	-5.09888	3.00196	null
GO:0001934	positive regulation of protein phosphorylation	4.76634	0.143914	0.650124	0.901833	null	null	33135
GO:0031401	positive regulation of protein modification process	4.93426	0.211847	0.657535	0.819435	null	null	33135
GO:0033138	positive regulation of peptidyl-serine phosphorylation	3.90374	0.019745	0.685511	0.748321	null	null	33135
GO:0050730	regulation of peptidyl-tyrosine phosphorylation	4.21171	0.0401284	0.754739	0.781311	null	null	33135
GO:0050731	positive regulation of peptidyl-tyrosine phosphorylation	4.1411	0.0341071	0.676429	0.795269	null	null	33135
GO:0034105	positive regulation of tissue remodeling	2.13033	0.000330275	0.785423	0.376415	-0.687167	6.81376	null
GO:0034116	positive regulation of heterotypic cell-cell adhesion	3.37254	0.00580939	0.771314	0.286542	-2.06022	5.47971	null
GO:0008284	positive regulation of cell population proliferation	4.99328	0.242688	0.70717	0.631222	null	null	34116
GO:0010628	positive regulation of gene expression	5.34253	0.542369	0.678824	0.691763	null	null	34116
GO:0030307	positive regulation of cell growth	4.26295	0.045154	0.732604	0.53357	null	null	34116
GO:0045787	positive regulation of cell cycle	4.7665	0.143968	0.723945	0.59728	null	null	34116
GO:0045944	positive regulation of transcription by RNA polymerase II	5.63454	1.06246	0.660521	0.775604	null	null	34116
GO:0048522	positive regulation of cellular process	6.23254	4.21032	0.662939	0.448891	null	null	34116
GO:0048584	positive regulation of response to stimulus	5.60195	0.985635	0.637776	0.744826	null	null	34116
GO:0050679	positive regulation of epithelial cell proliferation	4.22742	0.0416073	0.732166	0.789913	null	null	34116
GO:0070374	positive regulation of ERK1 and ERK2 cascade	4.3966	0.0614263	0.673351	0.549116	null	null	34116
GO:0042981	regulation of apoptotic process	5.39241	0.608384	0.772815	0.151188	-3.44356	1.65892	null
GO:0043066	negative regulation of apoptotic process	5.06879	0.288774	0.758964	0.920562	null	null	42981
GO:0043523	regulation of neuron apoptotic process	4.18825	0.0380186	0.806506	0.77673	null	null	42981
GO:0045475	locomotor rhythm	2.87622	0.00185102	0.935516	0	5.06877	3.31968	null
GO:0046189	phenol-containing compound biosynthetic process	4.6372	0.106896	0.956379	0.0437537	6.16019	0.00730406	null
GO:0042438	melanin biosynthetic process	4.1411	0.0341071	0.958524	0.802565	null	null	46189
GO:0046885	regulation of hormone biosynthetic process	2.98767	0.00239326	0.838126	0.163783	-5.71936	4.88024	null
GO:0032352	positive regulation of hormone metabolic process	2.68574	0.00119293	0.765281	0.920918	null	null	46885
GO:0050810	regulation of steroid biosynthetic process	3.79595	0.0154046	0.840896	0.179462	-6.48474	3.75069	null
GO:0060231	mesenchymal to epithelial transition	2.68664	0.0011954	0.905659	0.0047156	3.45166	5.39339	null
GO:0090505	epiboly involved in wound healing	3.27967	0.0046904	0.849101	0.535745	null	null	60231
GO:0070141	response to UV-A	2.81558	0.00160948	0.944472	0	-5.59315	-5.31989	null
GO:0070486	leukocyte aggregation	2.9425	0.00215665	0.996576	0.00484348	1.47227	1.20369	null
GO:0071352	cellular response to interleukin-2	2.84696	0.00173025	0.871961	0.340424	-3.10041	-5.27545	null
GO:0019221	cytokine-mediated signaling pathway	4.99308	0.242575	0.683737	0.718799	null	null	71352
GO:0035723	interleukin-15-mediated signaling pathway	3.18213	0.00374641	0.737599	0.997476	null	null	71352
GO:0038110	interleukin-2-mediated signaling pathway	2.84572	0.00172532	0.745914	0.991776	null	null	71352
GO:0050847	progesterone receptor signaling pathway	3.01995	0.00257812	0.759353	0.718547	null	null	71352
GO:0071350	cellular response to interleukin-15	3.18213	0.00374641	0.868353	0.550859	null	null	71352
GO:0071407	cellular response to organic cyclic compound	4.83703	0.169355	0.859511	0.504387	null	null	71352
GO:0071363	cellular response to growth factor stimulus	4.92473	0.20725	0.882819	0.16654	-4.37201	-4.40787	null
GO:0034698	response to gonadotropin	2.81558	0.00160948	0.881165	0.525374	null	null	71363
GO:0038084	vascular endothelial growth factor signaling pathway	3.79239	0.0152789	0.733265	0.82274	null	null	71363
GO:0038179	neurotrophin signaling pathway	3.87349	0.0184165	0.739344	0.833138	null	null	71363
GO:0071371	cellular response to gonadotropin stimulus	2.71012	0.00126195	0.871617	0.538873	null	null	71363
GO:0071503	response to heparin	2.31175	0.000502807	0.907777	0.123385	-3.21014	-6.11439	null
GO:0072182	regulation of nephron tubule epithelial cell differentiation	2.6149	0.00101301	0.832147	0.0960266	0.425866	6.64515	null
GO:0090189	regulation of branching involved in ureteric bud morphogenesis	3.15045	0.00348268	0.83005	0.417154	null	null	72182
GO:0090190	positive regulation of branching involved in ureteric bud morphogenesis	3.11694	0.00322388	0.745177	0.977074	null	null	72182
GO:1905208	negative regulation of cardiocyte differentiation	2.70329	0.00124223	0.816531	0.476097	null	null	72182
GO:2000698	positive regulation of epithelial cell differentiation involved in kidney development	2.31387	0.000505272	0.758289	0.942732	null	null	72182
GO:0072529	pyrimidine-containing compound catabolic process	4.89417	0.193167	0.925523	0.174306	5.29042	-1.11291	null
GO:0072523	purine-containing compound catabolic process	5.50302	0.784847	0.925338	0.690518	null	null	72529
GO:1900120	regulation of receptor binding	1.44716	6.6548e-05	0.851685	0	1.82037	-1.88256	null
GO:0032768	regulation of monooxygenase activity	1.86332	0.000177461	0.850848	0.585782	null	null	1900120
GO:0045737	positive regulation of cyclin-dependent protein serine/threonine kinase activity	1.59106	9.36601e-05	0.714826	0.720888	null	null	1900120
GO:1900122	positive regulation of receptor binding	0.90309	1.72532e-05	0.858029	0.810601	null	null	1900120
GO:1902947	regulation of tau-protein kinase activity	0.90309	1.72532e-05	0.790936	0.539959	null	null	1900120
GO:1902949	positive regulation of tau-protein kinase activity	0.477121	4.92948e-06	0.746042	0.65153	null	null	1900120
GO:1902743	regulation of lamellipodium organization	3.91025	0.0200433	0.841393	0.111559	-7.48431	-0.414785	null
GO:2000392	regulation of lamellipodium morphogenesis	3.11361	0.00319923	0.826874	0.608696	null	null	1902743
GO:1902893	regulation of miRNA transcription	3.54045	0.00855265	0.812004	0.186454	-6.27073	2.15718	null
GO:1902895	positive regulation of miRNA transcription	3.45301	0.00699247	0.724943	0.962675	null	null	1902893
GO:2000630	positive regulation of miRNA metabolic process	3.76582	0.0143719	0.71684	0.95601	null	null	1902893

## Sheet: E. REVIGO GO terms in Fig. 1k
TermID	Name	for graphing	LogSize	Frequency	Uniqueness	Dispensability	PC_0	PC_1	Representative
GO:0048662	negative regulation of smooth muscle cell proliferation	0	3.39076	0.00605833	0.735831	0.274971	-8.34583	-0.198877	0
GO:2000045	regulation of G1/S transition of mitotic cell cycle	0	4.20847	0.0398302	0.76494	0.179061	-7.33786	0.648428	0
GO:0046890	regulation of lipid biosynthetic process	0	4.40446	0.0625477	0.753441	0.199067	-6.32764	-1.95187	0
GO:0071901	negative regulation of protein serine/threonine kinase activity	0	2.233	0.000419006	0.694348	0.138148	-6.02024	-4.74316	0
GO:2001233	regulation of apoptotic signaling pathway	0	4.75085	0.138871	0.650951	0.194888	-5.90207	0.882069	0
GO:0038061	non-canonical NF-kappaB signal transduction	0	3.38417	0.00596714	0.732429	0.28192	-5.37304	3.7637	0
GO:0045429	positive regulation of nitric oxide biosynthetic process	0	3.57334	0.00922552	0.684367	0.378184	-5.06277	-2.91116	0
GO:0032967	positive regulation of collagen biosynthetic process	0	2.84323	0.00171546	0.715995	0.380093	-4.94959	-4.47694	0
GO:0072331	signal transduction by p53 class mediator	0	4.08019	0.0296434	0.712602	0.356838	-4.87806	3.20694	0
GO:0044087	regulation of cellular component biogenesis	0	5.40722	0.629487	0.738137	0.236423	-4.85296	0.00525277	0
GO:0070098	chemokine-mediated signaling pathway	0	4.32919	0.0525951	0.647053	0	-4.82306	2.68675	0
GO:0120162	positive regulation of cold-induced thermogenesis	0	3.48799	0.00757908	0.651443	0.313721	-4.56323	-3.47847	0
GO:0043067	regulation of programmed cell death	0	5.40566	0.62723	0.738202	0.271579	-4.56108	-0.35048	0
GO:0140467	integrated stress response signaling	0	2.85309	0.00175489	0.912785	0.33107	-3.85186	7.00305	0
GO:1905332	positive regulation of morphogenesis of an epithelium	0	3.2982	0.00489497	0.699419	0.150335	-3.43506	-3.58996	0
GO:0140546	defense response to symbiont	0	5.35691	0.56063	0.862533	0.27314	-3.04133	6.71726	0
GO:0097067	cellular response to thyroid hormone stimulus	0	3.15927	0.00355416	0.865	0.49759	-2.77617	7.38369	70098
GO:2000501	regulation of natural killer cell chemotaxis	0	2.34044	0.000537313	0.686813	0.395189	-2.30256	2.5899	0
GO:2000425	regulation of apoptotic cell clearance	0	2.4609	0.000709845	0.770584	0.1419	-1.82732	0.0593931	0
GO:0071456	cellular response to hypoxia	0	4.02995	0.0264048	0.86783	0.457316	-1.78207	7.04503	70098
GO:0006915	apoptotic process	0	5.20733	0.397284	0.97069	0.0554744	1.10143	7.1033	0
GO:0030163	protein catabolic process	0	5.8996	1.95602	0.95726	0.321968	1.72188	-6.25155	0
GO:0043933	protein-containing complex organization	0	6.19389	3.8518	0.976618	0.0450948	1.76084	6.38235	0
GO:0031638	zymogen activation	0	4.1262	0.032956	0.964067	0.0313037	2.0766	-6.33597	0
GO:0000041	transition metal ion transport	0	5.58755	0.95349	0.994409	0.307836	2.94446	5.46976	0
GO:0034504	protein localization to nucleus	0	5.05339	0.278715	0.973072	0.0533228	3.24129	5.18988	0
GO:0070371	ERK1 and ERK2 cascade	0	3.2408	0.00428865	0.736825	0.48839	3.42716	-4.99808	38061
GO:0030003	intracellular monoatomic cation homeostasis	0	5.64132	1.07916	0.989794	0	3.79036	-1.4367	0
GO:0036336	dendritic cell migration	0	2.67302	0.00115843	0.926684	0.025763	4.9483	3.26862	0
GO:0060429	epithelium development	0	5.12196	0.326381	0.928698	0	5.46728	0.789429	0
GO:2000772	regulation of cellular senescence	1	3.2014	0.00391647	0.787876	0.197668	-7.68978	-2.31161	0
GO:2000773	negative regulation of cellular senescence	1	2.91328	0.00201616	0.765425	0.190968	-7.4597	-3.15704	0
GO:1900125	regulation of hyaluronan biosynthetic process	1	2.53782	0.000847871	0.799331	0.19229	-6.89729	-4.31864	0
GO:0030155	regulation of cell adhesion	1	4.96322	0.226458	0.755428	0.297441	-6.3901	0.0513616	0
GO:2000278	regulation of DNA biosynthetic process	1	3.8811	0.0187419	0.763108	0.22658	-5.87274	-2.16651	0
GO:0070528	protein kinase C signaling	1	3.1486	0.00346789	0.743078	0.350319	-5.09415	4.08445	0
GO:0046209	nitric oxide metabolic process	1	4.04497	0.027334	0.982647	0.088767	-1.69073	-7.96047	0
GO:0051454	intracellular pH elevation	1	2.5977	0.000973572	0.817301	0.363456	0.235371	-1.43727	0
GO:0044271	cellular nitrogen compound biosynthetic process	1	6.72073	12.957	0.946719	0.336545	0.796173	-6.86633	0
GO:0018212	peptidyl-tyrosine modification	1	2.27416	0.000460906	0.978643	0.388057	3.4224	-4.87099	0
GO:0070199	establishment of protein localization to chromosome	1	3.7558	0.0140441	0.974858	0.029036	3.43513	5.11523	0
GO:0006801	superoxide metabolic process	1	4.79299	0.153021	0.969601	0.0823114	4.70426	-3.54606	0
GO:0002068	glandular epithelial cell development	1	3.09517	0.00306614	0.923468	0.0266222	5.38486	0.963023	0
GO:0010749	regulation of nitric oxide mediated signal transduction	1.58496	2.49415	0.000766534	0.751545	0.139839	-7.89366	2.93816	0
GO:0010566	regulation of ketone biosynthetic process	1.58496	3.29181	0.0048235	0.782125	0.209017	-7.64366	-1.6948	0
GO:0050810	regulation of steroid biosynthetic process	1.58496	3.79595	0.0154046	0.772052	0.157393	-6.51518	-2.60779	0
GO:0046885	regulation of hormone biosynthetic process	1.58496	2.98767	0.00239326	0.783891	0.201474	-5.77935	-3.81366	0
GO:0042127	regulation of cell population proliferation	1.58496	5.2302	0.418764	0.745323	0.318597	-5.43545	-0.274592	0
GO:0070141	response to UV-A	1.58496	2.81558	0.00160948	0.929472	0.183545	-2.36057	6.96445	0
GO:0002664	regulation of T cell tolerance induction	1.58496	2.49136	0.000761605	0.746318	0.133367	-1.32525	2.57823	0
GO:0046189	phenol-containing compound biosynthetic process	1.58496	4.6372	0.106896	0.963614	0.225813	-0.23297	-7.54153	0
GO:0090505	epiboly involved in wound healing	1.58496	3.27967	0.0046904	0.863699	0.562366	1.06648	-6.12143	2068
GO:0072529	pyrimidine-containing compound catabolic process	1.58496	4.89417	0.193167	0.946441	0.139669	1.1084	-6.71081	0
GO:1900120	regulation of receptor binding	1.58496	1.44716	6.6548e-05	0.78986	0.114434	1.29717	1.12481	0
GO:0030212	hyaluronan metabolic process	1.58496	3.9878	0.0239622	0.979903	0.177922	1.97695	-5.28054	0
GO:0070486	leukocyte aggregation	1.58496	2.9425	0.00215665	0.98676	0.0261201	3.47524	3.02099	0
GO:0030878	thyroid gland development	1.58496	3.1038	0.00312776	0.93078	0.320364	5.40289	-0.0932798	0
GO:0045475	locomotor rhythm	1.58496	2.87622	0.00185102	0.963182	0.307699	5.54225	-1.28471	0
GO:0090199	regulation of release of cytochrome c from mitochondria	2	3.55242	0.00879173	0.776928	0.159614	-7.6293	1.53088	0
GO:0071675	regulation of mononuclear cell migration	2	3.98254	0.0236738	0.669026	0.509894	-6.40026	3.55266	2664
GO:0007249	canonical NF-kappaB signal transduction	2	4.17161	0.0365891	0.705384	0	-5.27027	3.10565	0
GO:0006954	inflammatory response	2	4.78525	0.15032	0.897407	0.274325	-3.5637	6.71508	0
GO:0090279	regulation of calcium ion import	2	3.31133	0.00504532	0.75812	0.147527	-2.1367	-0.612981	0
GO:0051851	modulation by host of symbiont process	2	3.68931	0.0120501	0.969605	0	-0.268309	7.45006	0
GO:0006468	protein phosphorylation	2	5.61472	1.01505	0.946567	0.387054	2.53189	-5.74519	0
GO:1903131	mononuclear cell differentiation	2	4.51224	0.0801681	0.91842	0.501197	3.80664	-5.04896	2068
GO:0030277	maintenance of gastrointestinal epithelium	2	3.38202	0.00593756	0.951207	0	4.55444	-1.2261	0
GO:1990266	neutrophil migration	2	3.81451	0.0160775	0.916715	0.0292718	4.99316	3.11173	0
GO:0042981	regulation of apoptotic process	2.32193	5.39241	0.608384	0.694642	0.332986	-5.62849	0.283418	0
GO:0019935	cyclic-nucleotide-mediated signaling	2.32193	4.3108	0.0504138	0.700021	0.623127	-3.53733	-4.17099	7249
GO:0090189	regulation of branching involved in ureteric bud morphogenesis	2.32193	3.15045	0.00348268	0.737108	0.144519	-2.99245	-3.76195	0
GO:0019221	cytokine-mediated signaling pathway	2.58496	4.99308	0.242575	0.615211	0.349537	-4.9037	2.28377	0
GO:0071363	cellular response to growth factor stimulus	2.58496	4.92473	0.20725	0.881699	0.246818	-4.42699	6.68377	0
GO:0048522	positive regulation of cellular process	2.80735	6.23254	4.21032	0.577516	0.248512	-4.93657	-1.02191	0
GO:0018108	peptidyl-tyrosine phosphorylation	2.80735	2.25527	0.000441188	0.961985	0.0240727	3.4147	-5.15193	0
GO:0045737	positive regulation of cyclin-dependent protein serine/threonine kinase activity	2.80735	1.59106	9.36601e-05	0.670441	0.598571	0	0	48522

## Sheet: F. EGFP+ Cells Diff. Gene Exp.
		EGFP+ in untreated			EGFP+ in colitis			EGFP+ in recovery
FeatureID	FeatureName	Average	Log2 fold change	p-value	Average	Log2 fold change	p-value	Average	Log2 fold change	p-value
feature_23069	mt-Cytb	2.02498	3.85167	5.0626e-74	0.38315	0.596901	0.0746089	0.0764949	-3.44984	4.89913e-86
feature_2325	Phgr1	1.50215	3.36236	1.47968e-54	0.0676147	-2.05928	2.99628e-12	0.165869	-1.49067	1.42817e-16
feature_23060	mt-Co2	2.21617	3.11002	1.64774e-46	0.643091	0.908178	9.65488e-05	0.155331	-2.79504	2.95352e-64
feature_21427	Cd74	0.511123	3.89946	3.01947e-45	0.0315535	-1.24775	0.0133264	0.0347349	-2.23937	4.5134e-20
feature_14696	Car4	0.799849	3.21186	7.54582e-45	0.030051	-2.38495	4.37346e-12	0.100692	-1.27721	4.39762e-10
feature_23085	Egfp	0.452597	2.92739	9.7713e-33	0.114194	0.483317	0.483313	0.0452725	-2.19593	1.09988e-27
feature_23059	mt-Co1	3.22671	2.76083	1.43649e-31	1.16297	1.04759	4.38231e-06	0.295832	-2.55154	7.84341e-51
feature_23057	mt-Nd1	0.57355	2.54605	1.11349e-27	0.228387	1.04809	7.25274e-06	0.0643962	-2.32762	1.34321e-39
feature_18571	Ly6a	0.253611	3.52395	1.68181e-27	0.0360612	-0.0956064	1	0.0183432	-2.38073	3.10849e-16
feature_23062	mt-Atp6	1.22123	2.37046	8.43449e-26	0.558948	1.16637	5.33307e-09	0.151819	-2.28857	2.23548e-46
feature_7580	Reg3b	0.667191	2.59193	7.29911e-25	0.21787	0.685578	0.0439286	0.0827394	-2.04747	3.47101e-27
feature_23063	mt-Co3	1.57239	2.17327	3.96964e-24	0.818889	1.23389	5.20236e-12	0.225582	-2.18668	1.05336e-49
feature_20575	Gm42418	1.70114	1.79161	4.1589e-23	0.92557	0.894516	5.33307e-09	0.377401	-1.59526	3.23688e-49
feature_8470	Pglyrp1	0.191183	3.46045	6.41687e-21	0.0480816	0.915657	0.215327	0.00936672	-3.18753	1.12666e-21
feature_7597	Hk2	0.710109	1.91015	4.57234e-20	0.22989	0.0255748	1	0.178358	-1.02695	1.379e-10
feature_16245	Crip1	0.386268	2.90102	6.44252e-20	0.0285484	-1.55155	0.00143018	0.0577615	-1.14949	0.000265584
feature_21882	Fth1	0.655486	2.01419	8.07735e-19	0.0420714	-2.43851	1.24999e-17	0.193579	-0.138787	1
feature_1045	Prdx6	0.483811	2.21439	2.26706e-18	0.0480816	-1.62308	4.7072e-07	0.119035	-0.511071	0.158279
feature_17837	Atp12a	0.15997	3.36937	3.71706e-17	0.00450765	-2.39502	0.00301639	0.0183432	-1.38073	0.00322362
feature_20416	H2-Aa	0.191183	3.12341	3.71706e-17	0.00901529	-1.95742	0.00447915	0.0253682	-1.2368	0.00288423
feature_14167	Lypd8	1.54117	1.63588	6.51929e-17	0.350094	-0.831098	7.10439e-05	0.532732	-0.355012	0.158016
feature_23066	mt-Nd4	0.417482	2.39875	6.55131e-17	0.162275	0.848901	0.0117477	0.0577615	-2.00956	6.3902e-21
feature_3619	S100a6	0.710109	1.87978	1.69337e-16	0.115696	-1.14366	1.423e-05	0.213093	-0.400808	0.228339
feature_23058	mt-Nd2	0.210692	2.78699	1.69337e-16	0.0751275	1.0527	0.0162091	0.0191237	-2.54423	1.99934e-20
feature_4205	Clca4b	0.312136	2.62301	3.20221e-15	0.112691	0.919253	0.0326246	0.0347349	-2.26739	4.08108e-19
feature_21755	Malat1	32.8367	1.25352	3.80176e-15	10.4773	-0.632808	1.6832e-05	14.568	-0.195573	0.533205
feature_14393	Cldn7	0.557943	1.76142	2.26316e-14	0.105178	-1.01271	0.000205639	0.180309	-0.360436	0.358205
feature_23064	mt-Nd3	0.144363	3.16949	2.59421e-14	0.0480816	1.26713	0.024815	0.0078056	-3.2108	7.02009e-19
feature_8706	2200002D01Rik	0.269217	2.24738	3.9903e-14	0.0195331	-2.02482	1.65835e-06	0.0667379	-0.422612	0.621128
feature_17015	Ftl1-ps1	0.175577	2.66525	4.54316e-13	0.0105178	-1.93051	0.002005	0.0323933	-0.809441	0.140872
feature_9827	Fgfr2	0.124854	-2.24203	1.0018e-12	0.552938	-0.0562539	1	0.620545	0.514422	0.00514554
feature_6480	Cox6a1	0.18338	2.66459	1.42928e-11	0.0180306	-1.24121	0.106702	0.032003	-1.00569	0.0279272
feature_6910	Actb	0.499418	1.94646	1.58139e-11	0.0585994	-1.58888	2.34232e-06	0.148306	-0.292508	0.806008
feature_20418	H2-Eb1	0.144363	3.14252	3.51592e-11	0.00751275	-1.76059	0.0726937	0.0187334	-1.28539	0.023735
feature_15593	Slc26a3	0.316038	1.83211	5.2704e-11	0.0405688	-1.53399	7.25274e-06	0.101863	-0.208599	0.932315
feature_17070	Cox7c	0.288726	2.24894	9.23366e-11	0.046579	-0.832173	0.207147	0.0647865	-0.818054	0.0325945
feature_22101	Ifit1bl1	0.226299	2.3622	1.6245e-10	0.0120204	-2.34927	1.58196e-05	0.0526878	-0.452464	0.700713
feature_15021	Pyy	0.0858374	4.71361	2.43402e-10	0.00450765	-0.826174	1	0.00273196	-3.17428	2.26488e-05
feature_21821	Cox8a	0.226299	2.03228	3.113e-10	0.0360612	-1.02362	0.0399577	0.0608837	-0.554256	0.278231
feature_18340	Cox6c	0.175577	2.2904	3.7539e-10	0.0315535	-0.609599	0.623241	0.0374669	-0.940014	0.0173761
feature_19072	Krt8	0.479909	1.66704	9.28323e-10	0.127717	-0.537413	0.283697	0.157673	-0.519419	0.101259
feature_23084	AC149090.1	0.464302	1.53678	9.8937e-10	0.228387	0.413292	0.355756	0.142843	-1.04166	4.92913e-09
feature_3627	Sprr2a3	0.167773	2.3145	1.22855e-09	0.0225382	-1.03822	0.164958	0.0370766	-0.771518	0.152432
feature_11110	Cox4i1	0.195085	2.23444	1.34716e-09	0.0285484	-0.98106	0.144881	0.0452725	-0.732756	0.148532
feature_16068	Calm1	0.191183	2.11343	1.55863e-09	0.0405688	-0.495633	0.768023	0.0456628	-0.857981	0.0250065
feature_8685	Lgals4	0.647682	1.30867	8.03435e-09	0.333566	0.255907	0.738839	0.243145	-0.792062	7.37807e-07
feature_13409	Btg1	0.218495	1.89741	8.70607e-09	0.0210357	-1.88276	1.10993e-05	0.0690796	-0.147851	1
feature_152	Cox5b	0.117051	3.21136	1.04759e-08	0.00751275	-1.40041	0.325019	0.0140501	-1.43431	0.0298169
feature_11934	Anxa2	0.2302	2.12174	1.42709e-08	0.0390663	-0.850897	0.242239	0.0569809	-0.70043	0.148532
feature_20576	AY036118	0.0507221	-2.59029	4.73647e-08	0.291495	-0.0883864	1	0.336812	0.58061	0.0468392
feature_579	Gm20528	0.0039017	-3.99798	7.188e-08	0.0871478	-0.462905	0.526166	0.133476	1.04134	0.000243981
feature_20603	Clic5	0.222397	1.766	8.36531e-08	0.0345586	-1.28852	0.00178712	0.0741532	-0.236259	0.935399
feature_4376	Ggh	0.078034	3.13491	1.01238e-07	0.0060102	-1.12092	0.67994	0.009757	-1.41725	0.0600616
feature_732	Dbi	0.132658	2.51198	1.58132e-07	0.0210357	-0.612306	0.85551	0.0241974	-1.11127	0.0372693
feature_14130	Hint1	0.113149	2.534	6.36101e-07	0.0135229	-1.00675	0.44186	0.0214654	-0.951885	0.183345
feature_18567	Ly6m	0.148265	2.30553	6.76185e-07	0.00901529	-2.14535	0.00178712	0.0359058	-0.426532	0.892817
feature_18575	Ly6g	0.0663289	3.35998	2.04128e-06	0.00751275	-0.421784	1	0.00624448	-1.90994	0.0106356
feature_7585	Reg3g	0.20679	1.84213	2.26733e-06	0.139737	1.41614	3.53348e-06	0.0370766	-2.08855	3.66209e-17
feature_513	Tm4sf20	0.156068	2.05284	2.45151e-06	0.0210357	-1.24121	0.0703076	0.0425405	-0.473838	0.732003
feature_18478	Ndufb9	0.0819357	2.68265	2.45632e-06	0.0105178	-0.752174	0.85551	0.0136598	-1.16189	0.118604
feature_23067	mt-Nd5	0.0897391	2.50652	3.24833e-06	0.0360612	1.02413	0.234557	0.0109278	-2.20082	9.57792e-08
feature_8661	Rps16	0.124854	2.17031	3.60625e-06	0.046579	0.541558	0.789408	0.0234168	-1.5431	2.61448e-05
feature_14943	Krt19	0.179478	1.75286	4.28489e-06	0.0751275	0.335289	0.911293	0.0483947	-1.10797	0.000234374
feature_6275	Plac8	0.405777	1.3166	6.27399e-06	0.114194	-0.774031	0.0207782	0.176407	-0.150316	1
feature_10811	Mt1	0.0429187	4.06452	6.33083e-06	0.0030051	-0.504246	1	0.00234168	-2.47384	0.0147243
feature_20415	H2-Ab1	0.0741323	2.68601	1.00031e-05	0.0060102	-1.35224	0.374648	0.0132695	-0.929517	0.412439
feature_4694	Ptprd	0.128756	-1.53685	1.6613e-05	0.357607	-0.0310414	1	0.38989	0.404484	0.130233
feature_2399	Serf2	0.152166	1.87338	2.42881e-05	0.0315535	-0.735976	0.486927	0.0448822	-0.546594	0.523112
feature_21770	Fau	0.171675	2.02239	2.71491e-05	0.016528	-1.76059	0.00540332	0.0495656	-0.281193	0.983189
feature_7573	Tmsb10	0.113149	2.32755	3.42303e-05	0.016528	-0.87348	0.629404	0.0245876	-0.83139	0.334004
feature_22232	Ndufb8	0.0702306	3.31245	3.55136e-05	0.00450765	-1.20469	0.789803	0.0078056	-1.54095	0.140871
feature_517	Ccl20	0.0468204	3.44303	3.7037e-05	0.00901529	0.495754	1	0.00312224	-2.55184	0.00132211
feature_6764	Ssc4d	0.0234102	6.45684	4.30447e-05	0	-0.726639	1	0	-4.28119	0.0260912
feature_12312	Gpx1	0.0507221	3.45684	4.65538e-05	0.00901529	0.364509	1	0.00351252	-2.47384	0.00210961
feature_11823	Gm20275	0.0624272	-1.79249	5.42876e-05	0.31854	0.730618	0.00071324	0.205287	-0.271382	0.63794
feature_16928	Uqcrb	0.0936408	2.5929	6.4072e-05	0.0120204	-0.836821	0.840474	0.016782	-1.0588	0.209434
feature_20059	Prss30	0.0858374	2.24231	6.45102e-05	0.0060102	-1.90114	0.034798	0.0218557	-0.395835	0.978228
feature_2393	Ckmt1	0.152166	1.85247	6.94771e-05	0.0676147	0.548996	0.675254	0.0362961	-1.32864	0.000102987
feature_6669	Ubc	0.0897391	2.16836	7.39408e-05	0.0105178	-1.29432	0.183221	0.0230265	-0.521143	0.81244
feature_731	Tmem37	0.039017	3.78699	8.79873e-05	0	-2.24121	0.494373	0.00351252	-1.61134	0.328109
feature_19928	Igf2r	0.0234102	-2.31135	9.41183e-05	0.0901529	-0.565975	0.257882	0.146355	1.01466	0.000168061
feature_10537	Jund	0.163871	1.74483	0.000106224	0.0315535	-0.967647	0.155191	0.0542489	-0.344555	0.92309
feature_16790	Cdhr2	0.0975425	2.02799	0.000106224	0.00751275	-1.97818	0.00922531	0.0288807	-0.199215	1
feature_351	Pard3bos1	0	-4.2147	0.000108525	0.0631071	-0.0704477	1	0.0741532	0.677326	0.243414
feature_13500	4930422I22Rik	0.0078034	-3.00873	0.00011038	0.0661122	-0.455337	0.661879	0.100692	0.988382	0.00332698
feature_3302	Maml3	0.0897391	-1.57773	0.00011125	0.31253	0.308295	0.562882	0.269293	0.100723	1
feature_21919	AW112010	0.113149	1.85593	0.000118883	0.0120204	-1.71514	0.00805134	0.0370766	-0.136803	1
feature_13669	Myl6	0.179478	1.64948	0.000121214	0.0450765	-0.637513	0.52243	0.061274	-0.436843	0.672194
feature_20410	Psmb8	0.039017	3.64948	0.000121214	0.00450765	-0.0892086	1	0.00273196	-2.28119	0.0270966
feature_11780	Cox5a	0.140461	1.91642	0.000135427	0.0240408	-0.991692	0.278122	0.0413697	-0.460291	0.793092
feature_20486	H2-D1	0.152166	1.63156	0.000154941	0.0405688	-0.554872	0.68172	0.0522975	-0.463111	0.621128
feature_686	Rnf152	0.0039017	-3.34487	0.000168472	0.00751275	-3.30586	6.20499e-12	0.0971798	3.68459	1.54046e-19
feature_18181	Slc15a1	0.0624272	2.56702	0.000177096	0.00751275	-0.88891	0.80324	0.0117084	-0.979073	0.418894
feature_11890	Slc51b	0.0312136	4.23444	0.000184324	0.0030051	0.0807164	1	0.00117084	-2.93327	0.0184366
feature_22146	Cyp2c55	0.0897391	-1.75708	0.00018516	0.0180306	-4.22587	4.27322e-37	0.392232	3.33065	9.16952e-42
feature_7154	Lrrc4	0.0078034	-3.02765	0.000203764	0.100671	0.249316	1	0.093277	0.30377	0.92309
feature_6737	Cldn3	0.120953	1.89459	0.000269743	0.0120204	-1.78278	0.00939329	0.0386377	-0.15191	1
feature_3639	S100a10	0.156068	1.64948	0.000281241	0.016528	-1.92678	0.000183705	0.0593226	0.0831105	1
feature_16248	Igha	0.105346	2.13491	0.000281241	0.0105178	-1.56314	0.0972429	0.0281002	-0.413296	0.92309
feature_14546	Ssh2	0.128756	-1.35581	0.000380796	0.314033	-0.0442419	1	0.344227	0.387619	0.185033
feature_8538	Ceacam20	0.113149	1.73619	0.000395691	0.0285484	-0.53987	0.85245	0.0362961	-0.533959	0.619001
feature_18352	Pabpc1	0.171675	1.42024	0.000438026	0.093158	0.465539	0.609406	0.0577615	-0.996136	0.000395989
feature_2742	Eif2s2	0.218495	1.27292	0.000523862	0.0976657	-0.0397964	1	0.0897644	-0.552826	0.141693
feature_10501	Ndufa13	0.0429187	3.06452	0.000562619	0.0030051	-1.08921	0.85551	0.0058542	-1.28119	0.445503
feature_18573	Ly6c1	0.0351153	3.51198	0.00064579	0.0030051	-0.504246	1	0.00312224	-1.88888	0.141693
feature_6791	Muc3	0.323841	1.0818	0.000668357	0.105178	-0.766716	0.015683	0.16665	0.000842801	1
feature_20394	H2-K1	0.277021	1.24198	0.000709217	0.0796351	-0.808252	0.0509627	0.128012	-0.0776782	1
feature_2884	Wfdc2	0.0468204	2.9576	0.000774676	0.0135229	0.817682	0.871905	0.00429308	-2.34831	0.00146387
feature_1594	Edf1	0.0507221	2.64948	0.000890637	0.00150255	-2.24121	0.153223	0.0101473	-0.625841	0.92309
feature_15696	Gm35188	0.0234102	-2.12436	0.000890637	0.0976657	-0.21474	1	0.123719	0.66912	0.0594745
feature_6946	Bri3	0.0585255	-1.62431	0.000929183	0.120204	-0.693176	0.0326246	0.209971	1.01534	4.79403e-06
feature_9723	Aldoa	0.0624272	2.31068	0.000931743	0.016528	0.0807164	1	0.0120987	-1.28119	0.0873604
feature_7460	Ccser1	0.105346	-1.37447	0.000947928	0.31253	0.276323	0.689007	0.273977	0.1009	1
feature_1861	Zeb2	0.0468204	3.26246	0.000950043	0.0030051	-1.08921	0.85551	0.00546392	-1.47384	0.313724
feature_1030	Gm36975	0.0117051	-2.52544	0.00098111	0.0811377	-0.0327417	1	0.0913256	0.544698	0.320023
feature_8280	Ndufa3	0.0351153	3.64948	0.00106642	0.00150255	-1.08921	0.936161	0.00312224	-1.76334	0.314704
feature_12468	Rpsa	0.0663289	2.49748	0.00106642	0.0405688	1.98118	0.00143018	0.00468336	-3.26525	1.83119e-10
feature_1500	Mrc1	0.039017	3.10891	0.00110502	0	-2.61972	0.234384	0.0058542	-0.933269	0.890853
feature_13093	Pttg1ip	0.0507221	2.59886	0.00110502	0.00901529	-0.281854	1	0.00858616	-1.2722	0.202858
feature_9567	Far1os	0.0039017	-3.15142	0.00113807	0.0375637	-0.855469	0.179917	0.0768852	1.40063	0.000301436
feature_15720	Nfkbia	0.0663289	2.17555	0.00126036	0.0270459	0.713934	0.843627	0.0120987	-1.64376	0.00203463
feature_6489	Rplp0	0.0741323	2.29898	0.00126272	0.0210357	0.180252	1	0.0140501	-1.35185	0.0417739
feature_12033	Cox7a2	0.113149	1.89816	0.00134548	0.0375637	0.0669106	1	0.029271	-1.00727	0.0767705
feature_16568	Gmds	1.20563	-0.888976	0.00148145	2.5934	0.336169	0.133253	2.13756	-0.0459259	1
feature_6569	Aldh2	0.0624272	2.31068	0.00162183	0.0180306	0.226567	1	0.0117084	-1.37762	0.0498854
feature_20984	Epcam	0.511123	1.05002	0.00162183	0.14725	-0.9921	0.000464125	0.273586	0.136	1
feature_20776	Crb3	0.0546238	2.38645	0.00184413	0.0060102	-1.12092	0.67994	0.0120987	-0.721765	0.782598
feature_3167	Naaladl2	0.0624272	-1.65322	0.00209357	0.21787	0.188392	1	0.204897	0.225231	0.92309
feature_4564	Sec61b	0.0546238	2.46891	0.00209357	0.0120204	-0.0712867	1	0.009757	-1.29696	0.141693
feature_20848	Myl12b	0.128756	1.55704	0.00220461	0.0255433	-1.08028	0.0996642	0.0495656	-0.146263	1
feature_389	Kansl1l	0.0156068	-2.25259	0.00229918	0.0631071	-0.520925	0.528405	0.0999117	0.977198	0.00383557
feature_14845	Cdk5rap3	0.0468204	2.89049	0.00257469	0.0180306	1.32172	0.488603	0.00351252	-2.79577	0.000105789
feature_21872	Ahnak	0.187282	1.24182	0.00257469	0.0616045	-0.587662	0.370356	0.0850811	-0.190904	0.988373
feature_2999	Atp5e	0.0585255	2.22322	0.00264873	0.016528	0.11109	1	0.0120987	-1.22873	0.114663
feature_9953	Cdhr5	0.148265	1.34992	0.00267526	0.0525892	-0.356689	0.85551	0.0608837	-0.38867	0.7322
feature_11822	Myo9a	0.039017	-1.73029	0.00271282	0.162275	0.357048	0.644339	0.136208	0.0825557	1
feature_16218	Atp5mpl	0.0546238	2.30845	0.00279732	0.0150255	0.147831	1	0.0105376	-1.31034	0.106775
feature_5987	Lcorl	0.039017	-1.75837	0.00286969	0.129219	-0.0873649	1	0.148306	0.499897	0.221062
feature_7361	Cycs	0.0585255	2.47956	0.00332233	0.0060102	-1.15194	0.676019	0.0120987	-0.795766	0.764076
feature_22520	Ndufa1	0.0429187	2.84213	0.00351267	0.0060102	-0.40471	1	0.00624448	-1.38637	0.323688
feature_1837	Strbp	0.0585255	-1.51291	0.00363725	0.15927	-0.090706	1	0.181871	0.462704	0.206766
feature_20053	Elob	0.0468204	2.49194	0.00367636	0.00751275	-0.504246	1	0.00897644	-1.0588	0.460764
feature_4944	Tspan1	0.198987	1.15516	0.00407115	0.0676147	-0.619723	0.25555	0.0963992	-0.119554	1
feature_3646	Rorc	0.0429187	2.59059	0.00461169	0.00751275	-0.288517	1	0.00741532	-1.23937	0.356126
feature_4615	Txn1	0.140461	1.35909	0.00461169	0.0495841	-0.355383	0.900809	0.0573712	-0.393667	0.76527
feature_2410	B2m	0.120953	1.43031	0.004643	0.0330561	-0.699502	0.484057	0.0491753	-0.24004	1
feature_20574	Gm26917	0.433089	0.92936	0.00485558	0.449262	1.20625	1.79613e-11	0.170943	-1.37876	9.78041e-19
feature_12159	Rbp2	0.0195085	4.64948	0.00503806	0	-0.919284	1	0.00078056	-2.47384	0.319723
feature_3187	Mecom	0.370662	-0.970127	0.00584772	0.83692	0.314573	0.325019	0.703285	-0.00859314	1
feature_10749	Phkb	0.0351153	-1.6868	0.00666051	0.118701	0.0189402	1	0.126451	0.394725	0.540289
feature_14273	Ubb	0.0819357	1.69952	0.00666051	0.0135229	-1.19727	0.182312	0.029271	-0.180106	1
feature_9697	Spns1	0.0312136	3.11897	0.00671657	0.00450765	-0.0892086	1	0.00351252	-1.73687	0.221062
feature_20056	Prss32	0.078034	1.73802	0.00702593	0.0315535	0.254746	1	0.022246	-1.00817	0.0859693
feature_13806	Upp1	0.0507221	2.87187	0.00790134	0	-3.12874	0.112195	0.00897644	-0.69623	0.92309
feature_8028	Gapdh	0.0585255	2.19005	0.007909	0.00901529	-0.839849	0.85551	0.0144404	-0.685342	0.793092
feature_8969	Nucb1	0.0585255	2.06452	0.007909	0.0270459	0.836791	0.623241	0.0113181	-1.65441	0.0024332
feature_13348	Slc25a3	0.20679	1.09603	0.007909	0.132224	0.416898	0.567389	0.0889839	-0.784381	0.00284585
feature_15345	Actg1	0.210692	1.15007	0.007909	0.0510867	-1.16069	0.0023398	0.107717	0.164171	1
feature_5597	Ccnl2	0.0468204	-1.61008	0.00800635	0.168285	0.264271	0.85551	0.150258	0.152835	1
feature_14701	Bcas3	0.0273119	-1.87408	0.00897435	0.0886504	-0.316174	0.870695	0.120206	0.731536	0.0566826
feature_7527	Igkc	0.078034	2.0418	0.0089995	0.0060102	-1.91928	0.0759871	0.0230265	-0.210803	1
feature_17390	Slc4a7	0.0663289	-1.42852	0.00928588	0.187819	0.092212	1	0.188115	0.28217	0.767369
feature_17663	Lgals3	0.226299	1.11427	0.0098394	0.0285484	-2.171	2.09788e-09	0.12567	0.57615	0.198896
feature_19000	Tmbim6	0.152166	1.32036	0.00996979	0.0480816	-0.575329	0.598685	0.0655671	-0.242883	0.966873
feature_9248	Tm6sf1	0.0195085	4.64948	0.0101721	0.00150255	0.273361	1	0.00039028	-3.28119	0.106268
feature_12672	Map7	0.0858374	-1.25741	0.0105189	0.222377	0.160334	1	0.211142	0.190459	0.92309
feature_3102	Hnf4g	0.0936408	-1.22826	0.0105569	0.234398	0.139323	1	0.225582	0.203736	0.92309
feature_13148	R3hdm4	0.0741323	1.72348	0.0105569	0.0270459	0.0618573	1	0.022246	-0.863784	0.221817
feature_21221	Hbegf	0.0468204	2.26246	0.0108547	0.0060102	-0.989673	0.738839	0.0113181	-0.65441	0.917219
feature_22963	Sat1	0.13656	1.26482	0.011666	0.0691173	0.1677	1	0.0550295	-0.681643	0.106775
feature_1262	Smyd3	0.0429187	-1.54034	0.0126779	0.154763	0.346528	0.73178	0.130354	0.0686896	1
feature_11677	Plet1	0.210692	1.03852	0.0127028	0.127717	0.254316	0.93345	0.09757	-0.631577	0.0354014
feature_22779	Xist	0.280922	-0.94451	0.0127028	0.393668	-0.499668	0.0482015	0.58542	0.689853	6.86427e-05
feature_4773	Nfia	0.148265	-1.06652	0.0131438	0.374135	0.377616	0.251052	0.302467	-0.0438498	1
feature_21801	Prdx5	0.0468204	2.22064	0.0131438	0.0030051	-1.82617	0.224112	0.012489	-0.336334	1
feature_5306	Id3	0.039017	2.7166	0.0131754	0.0030051	-1.1923	0.837683	0.00702504	-0.92635	0.782598
feature_10677	Ddx39	0.0273119	3.19005	0.0132811	0.0060102	0.59529	1	0.00234168	-2.25145	0.0596341
feature_14923	Top2a	0.0078034	-2.40941	0.013388	0.100671	1.09136	0.00176785	0.051517	-0.547838	0.362831
feature_350	Pard3b	0.195085	-1.01013	0.0137971	0.458277	0.324084	0.401282	0.383645	-0.00705657	1
feature_8116	Klra17	0.0156068	4.97141	0.0137971	0	-0.504246	1	0.00039028	-2.79577	0.339385
feature_18315	Snhg18	0.0546238	2.00178	0.0140902	0.0150255	-0.132277	1	0.0140501	-0.90824	0.442756
feature_16679	Edn1	0.0351153	2.64948	0.0142931	0.00450765	-0.619723	1	0.00624448	-1.08681	0.619001
feature_18940	Slc38a2	0.18338	1.08979	0.0142931	0.106681	0.233833	1	0.0823491	-0.640735	0.0566826
feature_19781	Gm10785	0	-3.38394	0.014533	0.0510867	0.610087	0.598846	0.0374669	-0.00320782	1
feature_20528	H2-T23	0.039017	2.46506	0.014533	0.0060102	-0.551552	1	0.0078056	-0.988411	0.680142
feature_10624	Nr3c2	0.460401	-0.824752	0.015072	0.752777	-0.0911233	1	0.83637	0.316127	0.191792
feature_14495	Smg6	0.039017	-1.5493	0.015072	0.0991682	-0.296138	0.85551	0.131524	0.660255	0.0566826
feature_1572	Tubb4b	0.0624272	1.8543	0.0157145	0.016528	-0.334321	1	0.0183432	-0.69623	0.656113
feature_22645	Slc6a8	0.0429187	2.47956	0.0159291	0.00901529	-0.111929	1	0.0078056	-1.25145	0.343602
feature_15454	Rhob	0.0507221	2.06452	0.01593	0.00450765	-1.61972	0.242239	0.0148306	-0.275898	1
feature_2287	Fmn1	0.0468204	-1.47026	0.0166913	0.15326	0.267371	0.85551	0.136208	0.131883	1
feature_13975	Gm12146	0.0078034	-2.37289	0.0166913	0.0405688	-0.52132	0.738839	0.0651768	1.01159	0.0270966
feature_4520	Zcchc7	0.148265	-1.04383	0.0168747	0.279474	-0.122259	1	0.32081	0.39713	0.18154
feature_8561	Plaur	0.0234102	3.45684	0.0170681	0	-1.72664	0.85551	0.00273196	-1.28119	0.782598
feature_20384	Tapbp	0.0624272	1.92959	0.0170681	0.0180306	-0.125735	1	0.016782	-0.872387	0.455814
feature_871	Csrp1	0.0273119	3.06452	0.0182958	0.00450765	0.0807164	1	0.00312224	-1.76334	0.27854
feature_6699	Chchd2	0.0858374	1.68119	0.0197374	0.0240408	-0.416783	1	0.0284905	-0.549786	0.767369
feature_9672	Gm20274	0.0195085	3.91252	0.0197906	0	-1.24121	0.91617	0.00156112	-1.73687	0.623951
feature_5618	Isg15	0.039017	2.52395	0.0206886	0.0105178	0.325829	1	0.00624448	-1.5563	0.13809
feature_4119	Arhgef38	0.179478	-1.04386	0.0215733	0.419211	0.268952	0.691843	0.365302	0.0493394	1
feature_9678	Aqp8	0.109248	1.33754	0.0215733	0.00450765	-3.32016	2.62098e-08	0.0546392	0.665714	0.333603
feature_3811	Atp1a1	0.140461	1.35114	0.0216769	0.0826402	0.539343	0.651814	0.0491753	-1.00871	0.00675842
feature_9378	Rps3	0.0507221	2.45684	0.0219494	0.0120204	0.041188	1	0.00897644	-1.34831	0.241136
feature_13708	Drg1	0.0039017	-2.6543	0.0221122	0.0450765	0.0236854	1	0.0495656	0.526162	0.653475
feature_6352	Atp5k	0.0507221	2.17143	0.0234618	0.00751275	-0.88891	0.85551	0.0128792	-0.634302	0.923031
feature_8707	Spint2	0.210692	1.04714	0.0240182	0.0946606	-0.26358	0.972502	0.105376	-0.274332	0.890853
feature_2763	Eif6	0.0429187	2.19005	0.0241932	0.00450765	-1.27684	0.58723	0.0113181	-0.473838	1
feature_14103	Uqcrq	0.0546238	2.00178	0.0241932	0.0150255	-0.132277	1	0.0140501	-0.90824	0.498492
feature_17246	Pde4d	0.331645	-0.853512	0.0241932	0.652106	0.20083	0.842634	0.591274	0.0698486	1
feature_20153	Mettl26	0.0273119	2.94904	0.0252083	0.0060102	0.402644	1	0.00312224	-1.88888	0.141693
feature_12437	Itga9	0.0234102	3.28691	0.0257825	0.0030051	-0.0347609	1	0.00234168	-1.83641	0.303956
feature_22362	Atrnl1	0.339448	-0.833601	0.0263324	0.70169	0.318086	0.288462	0.58542	-0.0384733	1
feature_11676	Plet1os	0	-3.29303	0.0266766	0.0495841	0.676326	0.488603	0.0347349	-0.0694474	1
feature_13182	Uqcr11	0.0468204	2.34992	0.027336	0.0150255	0.452685	1	0.00819588	-1.53797	0.100082
feature_6101	Fryl	0.167773	-0.973235	0.0279186	0.274966	-0.278365	0.721763	0.351252	0.514997	0.0248896
feature_1816	Gsn	0.0546238	1.85593	0.0279944	0.0150255	-0.267207	1	0.0160015	-0.725376	0.649832
feature_7114	Cftr	0.0663289	-1.46368	0.0279944	0.184814	0.0208922	1	0.19475	0.352395	0.669158
feature_13674	Rpl41	0.15997	1.23444	0.0279944	0.126214	0.990261	0.00953244	0.0542489	-1.32183	2.82417e-06
feature_21292	Pcdh1	0.0351153	2.44785	0.0280238	0.0060102	-0.40471	1	0.00702504	-1.03327	0.63681
feature_22770	Rps4x	0.0507221	2.06452	0.029221	0.0240408	0.882777	0.68172	0.009757	-1.68029	0.00948489
feature_1521	Armc3	0.0117051	5.64948	0.0315023	0	0.0807164	1	0	-3.47384	0.333603
feature_17379	Cadps	0.0156068	4.38645	0.0315023	0	-0.726639	1	0.00078056	-2.2108	0.545973
feature_7526	Gm30211	0.039017	2.25093	0.032187	0.00150255	-2.16721	0.197921	0.0105376	-0.251445	1
feature_21553	Smad7	0.101444	1.33828	0.0330625	0.0225382	-1.09919	0.0978585	0.0460531	0.0286627	1
feature_19161	Smim22	0.0468204	2.18	0.0331563	0.00751275	-0.760586	0.91617	0.0117084	-0.689566	0.890853
feature_18801	Cyp2d9	0.0273119	2.84213	0.033604	0.00150255	-1.24121	0.85551	0.00468336	-0.943323	0.92309
feature_8188	Pde3a	0.0819357	-1.16021	0.0336822	0.168285	-0.138024	1	0.196701	0.440213	0.221062
feature_13334	Arl1	0.0468204	1.99237	0.0338371	0.0255433	1.08072	0.401282	0.00897644	-1.79577	0.00218345
feature_21850	Tmem179b	0.0468204	1.99237	0.0338371	0.0060102	-1.21207	0.494373	0.0140501	-0.351847	1
feature_16974	Adcy2	0.0351153	2.38645	0.0345281	0.0150255	1.01659	0.803142	0.00507364	-1.98841	0.0145248
feature_9310	Picalm	0.039017	-1.45333	0.0346288	0.123209	0.198368	1	0.115133	0.196457	0.970277
feature_8517	Apoc2	0.0312136	2.57148	0.0355108	0	-2.67417	0.247439	0.00702504	-0.395835	1
feature_20448	Slc44a4	0.120953	1.24009	0.0362638	0.0510867	-0.173705	1	0.0526878	-0.430769	0.689414
feature_15883	Rad51b	0.0117051	-2.2085	0.0391116	0.0480816	-0.540225	0.73178	0.0776657	1.00009	0.0366511
feature_19566	Zbtb20	0.152166	-0.959327	0.0392728	0.238905	-0.338823	0.512315	0.318469	0.56373	0.0126906
feature_8007	Tpi1	0.0429187	2.06452	0.0396477	0.0105178	-0.241212	1	0.0109278	-0.863784	0.63681
feature_20098	Rps2	0.0507221	1.99741	0.0398403	0.0195331	0.42864	1	0.0117084	-1.27453	0.110158
feature_12666	Ifngr1	0.101444	1.35998	0.0409483	0.0270459	-0.800639	0.412308	0.0441017	-0.132801	1
feature_8761	Cox6b1	0.0741323	1.82166	0.0421305	0.0150255	-0.78178	0.85551	0.0234168	-0.449991	0.930334
feature_18316	Sema5a	0.0507221	-1.34729	0.0421305	0.130722	-0.00288384	1	0.140111	0.359804	0.619001
feature_21728	Drap1	0.0273119	2.94904	0.0431205	0.0060102	0.402644	1	0.00312224	-1.88888	0.224628
feature_18550	Ptp4a3	0.0273119	2.74259	0.0439026	0.00751275	0.578216	1	0.00351252	-1.85235	0.15508
feature_11475	St3gal4	0.0429187	-1.37289	0.0439795	0.156265	0.580643	0.129171	0.11123	-0.171947	1
feature_17410	Ube2e2	0.0351153	-1.51643	0.0439795	0.0916555	-0.227182	1	0.115913	0.595584	0.172741
feature_2045	Hoxd4	0.0312136	2.49748	0.0441433	0.00751275	0.142117	1	0.00546392	-1.3743	0.319723
feature_6779	Gm16599	0.0039017	-2.82625	0.0441433	0.0330561	-0.690342	0.650551	0.0604934	1.2266	0.0306125
feature_6987	Pan3	0.0702306	-1.19535	0.0441433	0.144245	-0.189736	1	0.175236	0.494453	0.159682
feature_3633	Sprr1a	0.0468204	1.92366	0.0446775	0.00751275	-0.978177	0.73178	0.0144404	-0.395835	1
feature_21968	Gnaq	0.0858374	-1.12158	0.0448528	0.193829	0.0779446	1	0.19436	0.241131	0.837801
feature_21977	Pcsk5	0.0234102	-1.67245	0.0448528	0.0390663	-1.18676	0.00375918	0.0987409	1.47045	3.82962e-06
feature_7209	Exoc4	0.105346	-1.04699	0.0449273	0.255433	0.311217	0.609212	0.216605	0.0157468	1
feature_10366	Sorbs2os	0	-3.1707	0.0453475	0.030051	-0.066125	1	0.0359058	0.673004	0.582468
feature_1959	Stk39	0.0468204	-1.33658	0.047503	0.154763	0.454727	0.396374	0.120206	-0.0603556	1
feature_11539	Hspa8	0.0546238	1.82845	0.047503	0.0180306	-0.000203637	1	0.0156112	-0.871173	0.477523
feature_8527	Bcl3	0.0507221	1.81298	0.0483673	0.0240408	0.61359	0.89561	0.0128792	-1.29327	0.0556563
feature_2567	Trmt6	0.0234102	2.99741	0.0494596	0.00751275	1.08072	0.900809	0.0019514	-2.47384	0.0350442
feature_12082	Nt5e	0.039017	2.10891	0.0531451	0.0030051	-1.65625	0.347711	0.0113181	-0.267387	1
feature_4228	Gng5	0.0663289	1.534	0.0534073	0.0120204	-1.1923	0.252605	0.0269293	-0.0449943	1
feature_8948	Aldh16a1	0.0312136	2.42709	0.054477	0.00751275	0.0807164	1	0.0058542	-1.28119	0.445503
feature_13060	Chchd10	0.0312136	2.42709	0.054477	0.00901529	0.364509	1	0.00546392	-1.47384	0.224628
feature_13450	Tmtc2	0.167773	-0.913454	0.054477	0.321546	0.0656968	1	0.321981	0.204933	0.855293
feature_14435	Rabep1	0.0195085	-1.70807	0.0549376	0.0796351	0.206247	1	0.0749338	0.235976	0.978228
feature_8040	Cd9	0.113149	1.16406	0.0558807	0.0570969	0.0532356	1	0.0503461	-0.538933	0.426178
feature_6256	Cfap299	0.0156068	3.97141	0.0580456	0	-0.919284	1	0.00117084	-1.79577	0.693651
feature_4020	Dpyd	0.0156068	-2.29068	0.0581676	0.0796351	-0.175623	1	0.0987409	0.656866	0.477539
feature_8526	Cblc	0.0663289	1.49748	0.0655848	0.0315535	0.29222	1	0.0226362	-0.876597	0.191377
feature_15432	Gm48678	0.0039017	-3.24534	0.0665122	0.0405688	-0.839849	0.65283	0.0819588	1.38928	0.0423001
feature_8537	Igsf23	0.0234102	2.87187	0.0672272	0.00150255	-1.00675	0.91617	0.0039028	-1.01441	0.892817
feature_14581	Unc119	0.0195085	3.42709	0.0672272	0.0030051	0.343751	1	0.00156112	-2.15191	0.272491
feature_14606	Rab11fip4	0.0234102	2.87187	0.0672272	0.0030051	-0.334321	1	0.00351252	-1.32183	0.726145
feature_14826	Hoxb13	0.0234102	2.87187	0.0672272	0.00751275	0.965239	1	0.00234168	-2.25145	0.0596341
feature_23037	Mid1	0.0936408	-1.04205	0.0672272	0.288489	0.772307	0.000495406	0.176797	-0.40884	0.197896
feature_3876	Rhoc	0.0585255	1.76684	0.0681261	0.00901529	-1.19939	0.458341	0.0202946	-0.205349	1
feature_6513	Wsb2	0.039017	2.10891	0.0700362	0.0060102	-0.845283	0.85551	0.0105376	-0.573373	0.957949
feature_20752	Safb	0.0663289	1.47956	0.0711529	0.0315535	0.273361	1	0.0230265	-0.852349	0.241136
feature_15623	Snx13	0.0273119	-1.61261	0.0713218	0.093158	0.0807164	1	0.0952284	0.333517	0.868303
feature_18328	Rpl30	0.0546238	1.82845	0.0723226	0.00751275	-1.28852	0.473842	0.0183432	-0.210803	1
feature_10662	Rnf150	0.0156068	-1.79677	0.0724704	0.07663	0.363304	0.85551	0.0647865	0.102512	1
feature_11684	Timm8b	0.0195085	3.23444	0.0724704	0.0030051	0.206247	1	0.0019514	-1.88888	0.343027
feature_22902	Mid2	0.0078034	-2.15787	0.0730889	0.046579	-0.0382247	1	0.0530781	0.536732	0.621128
feature_15189	Rpl38	0.078034	1.59886	0.0742237	0.0661122	1.59529	0.00176785	0.0163918	-2.06994	5.6064e-07
feature_21084	Aqp4	0	-3.00873	0.0776701	0.0706198	1.91079	8.45243e-07	0.0206848	-1.30391	0.00329561
feature_8988	Rpl18	0.0546238	1.80149	0.0779497	0.0210357	0.232719	1	0.0152209	-1.00989	0.314474
feature_11301	Endod1	0.0624272	1.50813	0.0792842	0.0150255	-0.799702	0.669383	0.0249779	-0.206357	1
feature_4899	Faf1	0.0507221	-1.24013	0.0808765	0.0976657	-0.378715	0.716322	0.136208	0.673593	0.0417739
feature_9947	Hras	0.0234102	3.13491	0.082702	0.00150255	-0.826174	1	0.00312224	-1.30391	0.747762
feature_1268	Cdc42bpa	0.0312136	-1.45206	0.0828243	0.0916555	0.0349127	1	0.0963992	0.351076	0.736295
feature_6857	Pdgfa	0.039017	1.97963	0.0841113	0.00450765	-1.3116	0.496894	0.0120987	-0.281193	1
feature_13843	Spred2	0.0195085	-1.6543	0.0841113	0.0676147	-0.0177735	1	0.0745435	0.4387	0.645617
feature_5307	E2f2	0.0351153	2.11343	0.0846833	0.0060102	-0.684818	1	0.00936672	-0.637336	0.925591
feature_11256	Casp4	0.0897391	1.24576	0.0878836	0.0420714	0.00796002	1	0.0382475	-0.544921	0.595031
feature_10669	Ndufb7	0.0273119	2.47956	0.0879353	0.0060102	0.010327	1	0.00507364	-1.25145	0.515369
feature_72	Gm28153	0.0117051	4.64948	0.0879366	0	-0.241212	1	0.00039028	-2.47384	0.619001
feature_3203	Kcnmb2	0.0117051	4.64948	0.0879366	0	-0.241212	1	0.00039028	-2.47384	0.619001
feature_6010	Sel1l3	0.0468204	-1.2537	0.0879366	0.154763	0.561988	0.16088	0.11123	-0.171947	1
feature_7346	Tmem176a	0.0117051	4.64948	0.0879366	0	-0.241212	1	0.00039028	-2.47384	0.619001
feature_9550	Mrvi1	0.0117051	4.64948	0.0879366	0	-0.241212	1	0.00039028	-2.47384	0.619001
feature_11623	Jaml	0.0117051	4.64948	0.0879366	0	-0.241212	1	0.00039028	-2.47384	0.619001
feature_15167	Abca9	0.0117051	4.64948	0.0879366	0	-0.241212	1	0.00039028	-2.47384	0.619001
feature_9317	Dlg2	0.0156068	-1.7633	0.0882332	0.111189	1.14966	0.000404969	0.0538587	-0.658677	0.148629
feature_2637	Ralgapa2	0.179478	-0.849855	0.0896296	0.401181	0.429129	0.122811	0.310273	-0.131834	0.978228
feature_8515	Relb	0.0663289	1.51563	0.0905105	0.0195331	-0.486968	0.99844	0.0253682	-0.38364	0.932584
feature_19929	Airn	0.249709	-0.788606	0.0912754	0.477811	0.224452	0.776805	0.425405	0.0363972	1
feature_14595	Nos2	0.0585255	1.6722	0.0920223	0.0360612	0.969685	0.401282	0.0148306	-1.51036	0.0052236
feature_186	Pdcl3	0.0156068	3.64948	0.0922672	0.00150255	0.0807164	1	0.00117084	-2.0588	0.477523
feature_1039	Gas5	0.0546238	1.60218	0.0922672	0.030051	0.665679	0.81451	0.0160015	-1.2108	0.0507558
feature_3465	Tlr2	0.0156068	3.64948	0.0922672	0	-1.08921	1	0.00156112	-1.47384	0.92309
feature_11774	Commd4	0.0156068	3.64948	0.0922672	0	-1.08921	1	0.00156112	-1.47384	0.92309
feature_15376	Dcxr	0.0156068	3.64948	0.0922672	0	-1.08921	1	0.00156112	-1.47384	0.92309
feature_18019	Itm2b	0.132658	1.03057	0.0922672	0.0330561	-1.22227	0.00668212	0.0749338	0.285729	0.92309
feature_22104	Ifit1	0.0273119	2.64948	0.0922672	0.0060102	0.154717	1	0.00429308	-1.47384	0.477523
feature_22172	Lcor	0.0429187	-1.3163	0.0922672	0.106681	-0.0485667	1	0.118255	0.39905	0.619001
feature_1962	Cers6	0.124854	-0.978549	0.0929605	0.219372	-0.174939	1	0.261097	0.430364	0.221912
feature_16371	Gpr137b	0.0312136	2.23444	0.0929605	0.0060102	-0.40471	1	0.00741532	-0.852349	0.875307
feature_22832	Diaph2	0.105346	-0.965228	0.0929605	0.210357	0.0578764	1	0.212703	0.226602	0.880314
feature_5813	Kcnk3	0.0117051	4.64948	0.0941705	0.00150255	1.08072	1	0	-3.79577	0.162656
feature_7878	Pparg	0.078034	-1.0536	0.0941705	0.109686	-0.658198	0.0663065	0.184603	0.860317	0.000520742
feature_1767	St6galnac6	0.18338	0.885716	0.0942798	0.105178	-0.0127105	1	0.0995214	-0.356481	0.619001
feature_2613	Dstn	0.257512	0.790759	0.0942798	0.157768	0.00450579	1	0.148306	-0.326455	0.545973
feature_4411	Pnrc1	0.0351153	2.06452	0.0942798	0.00901529	-0.156323	1	0.00897644	-0.888875	0.739328
feature_9500	Mrpl17	0.0195085	3.06452	0.0942798	0.00150255	-0.619723	1	0.00273196	-1.28119	0.782598
feature_9911	Fuom	0.0195085	3.42709	0.0942798	0	-1.50425	0.973605	0.00234168	-1.25145	0.92309
feature_12491	E530011L22Rik	0	-2.90511	0.0942798	0.0210357	-0.334321	1	0.0308321	0.9412	0.319723
feature_14678	Wfdc18	0.0195085	3.23444	0.0942798	0.0060102	1.23272	0.985593	0.00117084	-2.79577	0.0534204
feature_16155	Evl	0.0039017	-2.3392	0.0942798	0.0315535	-0.201319	1	0.0409794	0.730521	0.412564
feature_17438	Chchd1	0.0273119	2.47956	0.0942798	0.00751275	0.343751	1	0.00468336	-1.47384	0.34383
feature_22797	Atp7a	0.0039017	-2.3392	0.0942798	0.0495841	0.598324	0.658609	0.0362961	-0.0485318	1
feature_3468	Trim2	0.0624272	-1.12414	0.0952055	0.14725	0.128872	1	0.142843	0.200309	0.932315
feature_20799	Fbxl17	0.120953	-0.931719	0.0952055	0.2359	0.062569	1	0.23729	0.214218	0.890853
feature_3932	Eps8l3	0.101444	1.13758	0.0967754	0.0270459	-1.01121	0.104168	0.0526878	0.121772	1
feature_19451	Dlg1	0.0624272	-1.13342	0.0967754	0.136732	-0.0141072	1	0.146745	0.329696	0.651821
feature_19532	4930565N06Rik	0	-2.95043	0.0967754	0.0225382	-0.276836	1	0.0316127	0.883714	0.336372
feature_19595	Gm609	0	-2.95043	0.0967754	0.0105178	-1.41114	0.104444	0.0347349	2.01802	0.000971073
feature_19700	Nrip1	0.078034	-1.11807	0.0984521	0.156265	-0.135775	1	0.182261	0.430743	0.343027
feature_15305	Lgals3bp	0.0312136	2.35998	0.09884	0.00901529	0.303109	1	0.0058542	-1.38073	0.316718
feature_2858	Hnf4aos	0	-2.96523	0.0992319	0.0345586	0.43686	0.964986	0.0288807	0.170019	1
feature_12287	Rbm6	0.0702306	-1.08558	0.100801	0.171291	0.246726	0.864575	0.1526	0.0855898	1
feature_13920	Asb3	0.0117051	-2.00157	0.100801	0.0555943	-0.0550604	1	0.0636157	0.526162	0.644249
feature_21223	Ankhd1	0.0741323	-1.07298	0.101882	0.184814	0.306992	0.762742	0.157673	0.0280691	1
feature_1509	Plxdc2	0.0234102	2.64948	0.102112	0	-2.24121	0.488603	0.00507364	-0.473838	1
feature_18334	Stk3	0.0741323	-1.06476	0.102112	0.151757	-0.0380212	1	0.165089	0.33522	0.619001
feature_18432	Samd12	0.0546238	-1.16473	0.102112	0.195331	0.856752	0.000840547	0.113572	-0.463922	0.221062
feature_18655	Apol9a	0.0234102	2.64948	0.102112	0.0030051	-0.504246	1	0.00429308	-1.0588	0.794304
feature_14425	Pfn1	0.0819357	1.40847	0.103231	0.0270459	-0.412823	1	0.0331738	-0.369501	0.935399
feature_16094	Chga	0.0117051	4.64948	0.104323	0	-0.241212	1	0.00039028	-2.47384	0.629798
feature_10518	Cope	0.039017	2.06452	0.10464	0.016528	0.665679	0.986214	0.00819588	-1.47384	0.114663
feature_13273	Chst11	0.0312136	2.17555	0.10464	0.00150255	-1.91928	0.401282	0.00897644	-0.210803	1
feature_13201	Oaz1	0.0585255	1.47956	0.105858	0.0180306	-0.447663	1	0.0230265	-0.374302	0.983189
feature_3188	Mecomos	0	-2.99437	0.105874	0.0360612	0.476645	0.93345	0.029271	0.130234	1
feature_20407	H2-DMb1	0.0273119	2.47956	0.107255	0.00450765	-0.378715	1	0.00546392	-1.02638	0.782598
feature_1116	Mgst3	0.0936408	1.20588	0.107328	0.0270459	-0.821103	0.339972	0.0456628	-0.0174594	1
feature_13216	Eef2	0.0468204	1.6775	0.109101	0.0195331	0.244215	1	0.0144404	-0.92635	0.38237
feature_5377	Sdhb	0.0351153	2.21652	0.109723	0.00901529	-0.0188193	1	0.0078056	-1.08152	0.58081
feature_11439	Opcml	0.0156068	3.64948	0.110279	0.00150255	0.0807164	1	0.00117084	-2.0588	0.502932
feature_15659	Immp2l	0.128756	-0.910514	0.110404	0.262946	0.173826	1	0.244315	0.111125	1
feature_4064	Camk2d	0.117051	-0.917922	0.112278	0.184814	-0.291517	0.768023	0.238461	0.516764	0.0680158
feature_18208	Selenop	0.039017	1.86099	0.114147	0.0030051	-1.85788	0.183221	0.0136598	-0.00435236	1
feature_13160	Sbno2	0.0819357	1.25093	0.115738	0.0555943	0.684788	0.447149	0.0304419	-1.0527	0.0120527
feature_20099	Snhg9	0.0195085	3.06452	0.115745	0.0030051	0.0807164	1	0.00234168	-1.66648	0.619001
feature_16547	Cdkal1	0.0312136	-1.40941	0.116805	0.0901529	0.0572574	1	0.093277	0.324528	0.857281
feature_10434	Galnt7	0.277021	-0.730378	0.117293	0.513872	0.240686	0.689847	0.451164	0.00884855	1
feature_8523	Nectin2	0.0507221	1.62395	0.11776	0.00901529	-1.11193	0.508035	0.019514	-0.12334	1
feature_3666	Selenbp1	0.0663289	1.39314	0.118974	0.0225382	-0.378715	1	0.0273196	-0.368485	0.932315
feature_10702	Cacna1a	0.0351153	1.97141	0.118974	0.016528	0.758788	0.922385	0.0078056	-1.47384	0.0943529
feature_11322	Smco4	0.0351153	1.97141	0.118974	0.0105178	-0.00674648	1	0.00936672	-0.917444	0.656113
feature_22796	Cox7b	0.0663289	1.39314	0.118974	0.0255433	-0.175623	1	0.0265391	-0.494596	0.808782
feature_10645	Otud4	0.0039017	-2.30471	0.119782	0.0405688	0.273361	1	0.0374669	0.268094	1
feature_15174	Sox9	0.0546238	1.55637	0.119782	0.0285484	0.520001	0.980461	0.0171723	-1.06945	0.121622
feature_16255	Ighm	0.0312136	2.11897	0.120944	0.00450765	-0.87348	0.85551	0.00858616	-0.535238	1
feature_20753	Micos13	0.0195085	2.91252	0.121221	0.0030051	-0.0347609	1	0.00273196	-1.47384	0.63681
feature_16	St18	0.0039017	-2.3163	0.121417	0	-4.89656	1.40524e-08	0.0483947	4.49195	9.76224e-12
feature_20549	Ppp1r11	0.0312136	2.23444	0.121417	0.00751275	-0.0892086	1	0.00702504	-1.03327	0.672025
feature_13163	Atp5d	0.039017	1.97963	0.122562	0.0135229	0.232719	1	0.009757	-1.09533	0.395205
feature_15142	Prkca	0.397973	-0.673146	0.122562	0.700188	0.219224	0.73178	0.622107	0.0132182	1
feature_22081	Papss2	0.0468204	-1.18924	0.123209	0.0540918	-1.15277	0.000885054	0.130744	1.30377	2.00838e-06
feature_3258	Spata5	0.0078034	-1.97501	0.123362	0.0330561	-0.395722	0.93345	0.048785	0.859586	0.183345
feature_3517	Glmp	0.0234102	2.54995	0.12343	0.0060102	0.315182	1	0.0039028	-1.47384	0.385566
feature_8702	Psmd8	0.0234102	2.54995	0.12343	0.00751275	0.665679	1	0.00351252	-1.73687	0.221062
feature_14427	Eno3	0.0234102	2.54995	0.12343	0.00450765	-0.0892086	1	0.00429308	-1.2108	0.66251
feature_3746	Rbm8a	0.0273119	2.47956	0.123655	0.0060102	0.010327	1	0.00507364	-1.25145	0.572039
feature_12260	Cish	0.0156068	3.38645	0.127441	0	-1.24121	0.91617	0.0019514	-1.2108	0.92309
feature_12549	Gm39469	0.0156068	3.38645	0.127441	0.00150255	-0.0892086	1	0.00156112	-1.73687	0.623951
feature_3396	Rsrc1	0.0351153	-1.31399	0.129427	0.0976657	0.12511	1	0.0960089	0.245711	0.92309
feature_15078	Kansl1	0.109248	-0.990389	0.129427	0.190824	-0.204686	1	0.232217	0.459929	0.219449
feature_6122	Pdgfra	0.0195085	3.06452	0.130866	0	-1.72664	0.85551	0.00312224	-0.888875	1
feature_18795	Naga	0.0351153	1.92702	0.134585	0.0060102	-0.845283	0.85551	0.0109278	-0.423212	1
feature_1120	Pbx1	0.120953	-0.889677	0.134709	0.214865	-0.0531394	1	0.234168	0.306172	0.592577
feature_16296	Esyt2	0.101444	-0.953182	0.13723	0.207352	0.112195	1	0.201775	0.176648	0.955749
feature_2562	Gpcpd1	0.101444	1.10059	0.137789	0.0360612	-0.597356	0.58723	0.0519073	-0.0801738	1
feature_19921	Agpat4	0.0663289	1.34367	0.138164	0.0270459	-0.130788	1	0.0273196	-0.494016	0.823685
feature_9783	Orai3	0.0156068	3.64948	0.140382	0.00150255	0.0807164	1	0.00117084	-2.0588	0.535641
feature_22286	Atp5md	0.039017	2.02145	0.140385	0.016528	0.621285	1	0.00858616	-1.40971	0.151541
feature_3530	Lamtor2	0.0312136	2.11897	0.14073	0.00450765	-0.87348	0.87743	0.00858616	-0.535238	1
feature_3696	Ctss	0.0663289	1.51563	0.14073	0.00751275	-1.84212	0.0540888	0.0284905	0.212054	1
feature_4722	Mllt3	0.0819357	-1.24864	0.14073	0.22388	0.265141	0.910441	0.197482	0.0941518	1
feature_5625	Cdk6	0.0234102	-1.51471	0.14073	0.0841427	0.262555	1	0.0757143	0.156213	1
feature_6013	Rbpj	0.0507221	1.5261	0.14073	0.0105178	-0.985373	0.528405	0.0206848	-0.111268	1
feature_14101	Aff4	0.0312136	-1.33541	0.14073	0.0706198	-0.276836	0.958813	0.0924964	0.613625	0.193432
feature_11355	Mrpl4	0.0234102	2.64948	0.143232	0.0060102	0.402644	1	0.00351252	-1.61134	0.365684
feature_6191	Slc4a4	0.0312136	-1.3455	0.143401	0.0871478	0.0746162	1	0.0889839	0.299277	0.890853
feature_20291	Zfand3	0.13656	-0.851249	0.14591	0.231393	-0.0861027	1	0.257585	0.324813	0.477523
feature_3415	Sptssb	0.0039017	-2.2085	0.146316	0.00450765	-2.75217	9.64681e-05	0.0437114	3.02441	1.41263e-07
feature_2598	Tasp1	0.0039017	-2.23316	0.149299	0.046579	0.621285	0.680866	0.0335641	-0.0752883	1
feature_3376	Plch1	0.0351153	-1.346	0.150112	0.115696	0.394575	0.738839	0.0940575	0.0020821	1
feature_2081	Dnajc10	0.0234102	-1.46798	0.150296	0.0811377	0.254746	1	0.0733727	0.157667	1
feature_19233	Ntan1	0.0351153	-1.28598	0.150296	0.0616045	-0.624998	0.310593	0.103034	0.903586	0.00778455
feature_622	Gm28382	0.0117051	4.06452	0.150871	0	-0.504246	1	0.00078056	-1.88888	0.782598
feature_5573	Faap20	0.0117051	4.06452	0.150871	0.00150255	0.758788	1	0.00039028	-2.79577	0.339385
feature_13161	Stk11	0.0351153	1.88395	0.150871	0.00901529	-0.321382	1	0.0105376	-0.666483	0.92309
feature_13419	Gm48768	0.0117051	4.06452	0.150871	0	-0.504246	1	0.00078056	-1.88888	0.782598
feature_20208	AI413582	0.0117051	4.06452	0.150871	0	-0.504246	1	0.00078056	-1.88888	0.782598
feature_3109	Il7	0.0039017	-2.25741	0.152347	0.0240408	-0.546066	0.85551	0.0401989	1.05668	0.114663
feature_4142	Bank1	0.0117051	-1.76837	0.152347	0.00450765	-3.33714	1.92607e-08	0.0651768	3.11112	1.44888e-11
feature_3335	Dclk1	0	-2.75991	0.153647	0	-4.32867	2.50641e-05	0.0327835	4.93555	1.39874e-08
feature_16101	Gm47167	0.0078034	-1.93548	0.153647	0.0450765	0.176932	1	0.0441017	0.314658	0.932315
feature_1092	Dcaf6	0.0117051	-1.77678	0.153724	0.0661122	0.539146	0.609212	0.0495656	-0.0588001	1
feature_12734	Ptprk	0.210692	-0.839454	0.153724	0.384653	0.0737164	1	0.381694	0.180557	0.92309
feature_944	Ivns1abp	0.0858374	-0.994374	0.155141	0.190824	0.204199	0.982223	0.174455	0.104699	1
feature_12970	Ddx21	0.0468204	1.56856	0.155141	0.0240408	0.495754	1	0.0148306	-1.04642	0.18154
feature_20100	Ndufb10	0.0234102	2.45684	0.155141	0.0060102	0.232719	1	0.00429308	-1.34831	0.550978
feature_1372	Atf3	0.0312136	2.01205	0.155455	0.00150255	-2.04857	0.241511	0.0101473	-0.0408782	1
feature_18222	Rpl37	0.0624272	1.37939	0.155455	0.0420714	0.809414	0.413001	0.0206848	-1.2108	0.0126906
feature_21859	Ubxn1	0.0312136	2.01205	0.155455	0.00751275	-0.288517	1	0.00858616	-0.757631	0.916841
feature_1847	Nr6a1	0.0819357	-0.967902	0.15617	0.127717	-0.387837	0.571728	0.177187	0.614418	0.0366511
feature_4780	Dock7	0.0273119	-1.38394	0.15617	0.0706198	-0.128737	1	0.08352	0.492995	0.465779
feature_19046	Cela1	0.0273119	2.19005	0.15617	0.0150255	1.29222	0.57419	0.00429308	-2.0588	0.0145043
feature_21786	Atg2a	0.0273119	2.19005	0.15617	0.0060102	-0.241212	1	0.00663476	-0.888875	0.829447
feature_14132	Tnip1	0.0663289	1.29585	0.157213	0.0105178	-1.59171	0.0361071	0.0327835	0.291697	1
feature_6539	Tpcn1	0.0624272	1.37939	0.157638	0.0375637	0.591332	0.779204	0.0218557	-1.03327	0.0675042
feature_6054	Pds5a	0.0468204	-1.1539	0.160537	0.106681	0.00271385	1	0.113572	0.323669	0.782598
feature_21524	1700061H18Rik	0	-2.80995	0.160537	0.0105178	-1.25913	0.213089	0.0312224	1.86601	0.0052236
feature_1258	Hnrnpu	0.0312136	-1.30471	0.160588	0.0871478	0.124156	1	0.0858616	0.247976	0.932315
feature_2267	Lgr4	0.0468204	-1.15787	0.161128	0.148752	0.61083	0.111278	0.103034	-0.231344	0.92309
feature_7263	Mkrn1	0.0741323	1.25716	0.161128	0.0240408	-0.586708	0.843627	0.0343447	-0.168029	1
feature_15763	Pole2	0.0195085	2.91252	0.161818	0.00450765	0.495754	1	0.00234168	-1.83641	0.336203
feature_19785	Atp5o	0.039017	1.86099	0.161827	0.016528	0.456225	1	0.0101473	-1.17838	0.275463
feature_3045	Psma7	0.0273119	2.32755	0.163865	0.00901529	0.495754	1	0.00507364	-1.47384	0.331652
feature_5037	Gm12860	0.078034	1.18382	0.164468	0.0315535	-0.305342	1	0.0366863	-0.296299	0.986005
feature_13011	Arid5b	0.0273119	-1.38394	0.164468	0.093158	0.364509	0.85551	0.0776657	0.0407355	1
feature_16500	Hist1h2bc	0.0585255	1.5202	0.164468	0.00901529	-1.41571	0.231658	0.0245876	0.0667307	1
feature_17086	Zcchc9	0.0351153	1.84213	0.164468	0.00901529	-0.359856	1	0.0109278	-0.615857	0.92309
feature_17169	Tnpo1	0.0234102	-1.40735	0.165489	0.0886504	0.495754	0.571728	0.0675185	-0.0752883	1
feature_2821	Ralgapb	0.0234102	-1.41353	0.166447	0.0736249	0.147144	1	0.0718115	0.250189	0.932315
feature_17209	Srek1	0.0234102	-1.57107	0.167663	0.0961631	0.437748	0.768023	0.0764949	-0.00153294	1
feature_13440	Mgat4c	0.120953	0.991271	0.167821	0.0450765	-0.630423	0.457156	0.0667379	-0.0017692	1
feature_2962	Tshz2	0.0234102	-1.42581	0.168177	0.0646096	-0.0964766	1	0.0749338	0.474763	0.593569
feature_8150	Gprc5a	0.0429187	1.61973	0.168177	0.0060102	-1.40471	0.308144	0.0171723	0.0180155	1
feature_8476	Foxa3	0.0585255	1.42066	0.168177	0.0375637	0.758788	0.571565	0.0191237	-1.18753	0.0220841
feature_13132	Bsg	0.0585255	1.42066	0.168177	0.0270459	0.158719	1	0.0218557	-0.72841	0.483374
feature_21964	Tle4	0.0624272	-1.04441	0.168177	0.189321	0.703079	0.0141751	0.122158	-0.339088	0.587687
feature_4925	Pdzk1ip1	0.0156068	3.16406	0.168314	0.00751275	2.08072	0.434137	0.00039028	-3.79577	0.00561394
feature_13051	Ddt	0.0156068	3.16406	0.168314	0	-1.37872	0.91617	0.00234168	-0.988411	0.957949
feature_19323	Iglc1	0.0156068	3.16406	0.168314	0	-1.37872	0.91617	0.00234168	-0.988411	0.957949
feature_8244	Rep15	0.113149	1.01721	0.170855	0.0435739	-0.551552	0.68172	0.0608837	-0.0618599	1
feature_12909	Lims1	0.039017	-1.2085	0.172244	0.102173	0.161335	1	0.09757	0.193925	0.983189
feature_523	Trip12	0.0546238	-1.27335	0.173921	0.132224	-0.0171974	1	0.142843	0.359298	0.782598
feature_1911	Pkp4	0.0273119	-1.3278	0.173921	0.0841427	0.24827	1	0.0761046	0.140872	1
feature_8347	Epn1	0.0507221	1.45684	0.173921	0.0150255	-0.525941	0.958231	0.0206848	-0.303913	1
feature_10724	Junb	0.0585255	1.40155	0.173921	0.0150255	-0.799702	0.669383	0.0253682	-0.129883	1
feature_13639	Rdh16	0.0741323	1.21652	0.174268	0.0525892	0.727079	0.401282	0.0281002	-1.06537	0.0135586
feature_16687	Ranbp9	0.0117051	-1.69925	0.174268	0.0585994	0.41396	0.85551	0.0480045	0.0540939	1
feature_17287	Itga2	0.0429187	-1.16216	0.174268	0.102173	0.0599578	1	0.104595	0.275697	0.904186
feature_22374	Pdzd8	0	-2.85831	0.174662	0.0195331	-0.397331	1	0.0300516	1.00421	0.320023
feature_4598	Klf4	0.175577	0.873836	0.174931	0.0495841	-1.18497	0.00280442	0.109669	0.361933	0.767369
feature_9930	Sirt3	0.0273119	2.12592	0.176401	0.0060102	-0.297795	1	0.00702504	-0.810873	0.92309
feature_22823	Pof1b	0.0468204	-1.12175	0.176401	0.118701	0.232719	1	0.107327	0.111125	1
feature_9323	Pcf11	0.0117051	-1.71684	0.17647	0.0360612	-0.445352	0.85551	0.0546392	0.858359	0.13981
feature_9210	Cib1	0.0468204	1.51703	0.177604	0.0180306	-0.0517339	1	0.0171723	-0.625841	0.774809
feature_10342	B430010I23Rik	0.0039017	-2.1707	0.178392	0.0240408	-0.446531	0.946854	0.0374669	0.95615	0.198187
feature_20661	Trerf1	0.0273119	2.32755	0.178392	0.00150255	-1.61972	0.639087	0.00702504	-0.395835	1
feature_15998	Ttll5	0.0078034	-1.86359	0.179605	0.0405688	0.0807164	1	0.0425405	0.400631	0.92309
feature_3600	Slc39a1	0.0195085	2.64948	0.181314	0.00450765	0.273361	1	0.00312224	-1.47384	0.545973
feature_22162	Entpd1	0.0195085	2.64948	0.181314	0	-2.00675	0.5986	0.00429308	-0.473838	1
feature_22265	Nfkb2	0.0195085	2.64948	0.181314	0.0030051	-0.241212	1	0.00351252	-1.15191	0.869403
feature_18884	Plxnb2	0.039017	1.68265	0.182731	0.00901529	-0.666518	0.91617	0.0140501	-0.351847	1
feature_13917	Acyp2	0.0078034	-1.89484	0.184842	0.07663	1.27336	0.00140573	0.0343447	-0.752992	0.184738
feature_16588	Slc22a23	0.0585255	-1.04749	0.185873	0.102173	-0.310605	0.85551	0.135037	0.572637	0.132309
feature_17446	Adk	0.105346	-0.876318	0.185873	0.169788	-0.213098	0.952872	0.207239	0.441893	0.199734
feature_4014	4930455H04Rik	0.0078034	5.23444	0.186306	0	0.495754	1	0	-3.0588	0.63681
feature_5511	Rere	0.132658	-0.808075	0.186306	0.276469	0.338302	0.488603	0.227924	-0.0563319	1
feature_5639	Lrrd1	0.0078034	5.23444	0.186306	0	0.495754	1	0	-3.0588	0.63681
feature_5797	Gm5129	0.0078034	5.23444	0.186306	0	0.495754	1	0	-3.0588	0.63681
feature_7087	Ndufa4	0.0351153	2.06452	0.186306	0.00751275	-0.421784	1	0.00936672	-0.736872	0.92309
feature_7486	Igkv1-135	0.0078034	5.23444	0.186306	0	0.495754	1	0	-3.0588	0.63681
feature_8291	Pirb	0.0078034	5.23444	0.186306	0	0.495754	1	0	-3.0588	0.63681
feature_8744	Tyrobp	0.0078034	5.23444	0.186306	0	0.495754	1	0	-3.0588	0.63681
feature_10414	Neil3	0	-2.67245	0.186306	0.0255433	0.273361	1	0.0241974	0.333517	1
feature_11468	Gm27162	0.0078034	5.23444	0.186306	0	0.495754	1	0	-3.0588	0.63681
feature_12622	Aig1	0.0351153	-1.21347	0.186306	0.0991682	0.276441	0.93345	0.0874228	0.092016	1
feature_13451	Gm15663	0.0078034	5.23444	0.186306	0	0.495754	1	0	-3.0588	0.63681
feature_14938	Krtap3-1	0.0078034	5.23444	0.186306	0	0.495754	1	0	-3.0588	0.63681
feature_15867	Gphn	0.0858374	-0.976703	0.186306	0.199839	0.310755	0.738839	0.169382	0.00563173	1
feature_16828	Tifab	0.0078034	5.23444	0.186306	0	0.495754	1	0	-3.0588	0.63681
feature_16839	Spock1	0.0078034	5.23444	0.186306	0	0.495754	1	0	-3.0588	0.63681
feature_17299	B430218F22Rik	0.0078034	5.23444	0.186306	0	0.495754	1	0	-3.0588	0.63681
feature_19481	Fyttd1	0	-2.6543	0.186306	0.0120204	-0.899106	0.659425	0.0273196	1.50598	0.0566489
feature_20843	Gm41609	0.0117051	4.06452	0.186306	0	-0.504246	1	0.00078056	-1.88888	0.794304
feature_21451	Adrb2	0.0078034	5.23444	0.186306	0	0.495754	1	0	-3.0588	0.63681
feature_6212	Areg	0.0312136	1.91252	0.188005	0.00450765	-1.04857	0.763896	0.0101473	-0.303913	1
feature_19662	St3gal6	0.0897391	-0.937983	0.188962	0.15927	-0.126184	1	0.183432	0.383378	0.456646
feature_15241	H3f3b	0.113149	0.97141	0.192713	0.0435739	-0.597356	0.513785	0.0632254	-0.00775254	1
feature_3589	Gm19710	0	-2.70807	0.192734	0.0270459	0.328644	1	0.0245876	0.278235	1
feature_14601	Nf1	0.039017	-1.19029	0.194704	0.0751275	-0.350146	0.85551	0.103034	0.645274	0.132889
feature_16087	Ndufb1-ps	0.0429187	1.64948	0.196695	0.00751275	-1.08921	0.617957	0.0163918	-0.135036	1
feature_216	Fhl2	0.039017	1.64948	0.196786	0.0150255	0.0807164	1	0.0128792	-0.778692	0.711924
feature_18770	L3mbtl2	0.0156068	3.16406	0.196786	0.00150255	-0.241212	1	0.0019514	-1.47384	0.868303
feature_12026	Mto1	0.0273119	2.06452	0.196832	0.0120204	0.727079	1	0.0058542	-1.47384	0.186225
feature_20746	Plin3	0.0273119	2.06452	0.196832	0.0060102	-0.352243	1	0.00741532	-0.736872	0.92309
feature_16336	Klf6	0.0741323	1.28491	0.197023	0.0150255	-1.26721	0.145442	0.0359058	0.158431	1
feature_22974	Rps6ka3	0.0351153	-1.40797	0.197023	0.111189	0.243446	1	0.100692	0.150653	1
feature_2747	Map1lc3a	0.0156068	3.16406	0.19801	0	-1.37872	0.93345	0.00234168	-0.988411	0.96652
feature_3473	Gm37240	0.0468204	-1.10951	0.19801	0.0781326	-0.476765	0.519972	0.116694	0.732613	0.0361307
feature_11813	Arih1	0.0975425	-0.87649	0.19801	0.162275	-0.162327	1	0.191237	0.399652	0.333603
feature_16657	Gcnt2	0.0624272	1.43316	0.19801	0.0105178	-1.37872	0.190565	0.0277099	0.111125	1
feature_20924	Map4k3	0.0351153	-1.26699	0.19801	0.124712	0.640144	0.188779	0.0850811	-0.238209	0.932315
feature_3526	Lmna	0.0468204	1.59503	0.198327	0.0285484	0.848056	0.623241	0.0132695	-1.34455	0.0566489
feature_4222	Mcoln2	0	-2.80995	0.204865	0.0360612	0.724573	0.738839	0.0245876	-0.117694	1
feature_12335	Nckipsd	0.0156068	3.16406	0.205545	0.00450765	1.08072	1	0.00117084	-2.47384	0.185344
feature_21307	Nr3c1	0.0234102	-1.49736	0.205545	0.0721224	0.00892568	1	0.0776657	0.388659	0.830335
feature_22510	Slc25a5	0.0702306	1.21091	0.205545	0.030051	-0.185178	1	0.032003	-0.3842	0.92309
feature_7932	Wnk1	0.0585255	-1.03351	0.205942	0.0901529	-0.504246	0.401278	0.136598	0.733562	0.0205299
feature_5744	Tomm7	0.0273119	2.32755	0.206415	0.00751275	0.206247	1	0.00546392	-1.26739	0.63681
feature_20403	Brd2	0.0624272	1.45154	0.207104	0.0255433	-0.0161452	1	0.0234168	-0.630563	0.726145
feature_4775	Patj	0.0468204	-1.16183	0.207819	0.103676	-0.0567872	1	0.115133	0.378064	0.647521
feature_11158	Rpl13	0.0429187	1.534	0.209756	0.0360612	1.43917	0.0290944	0.0105376	-1.83641	0.000300733
feature_748	Gpr39	0.0195085	-1.44504	0.209951	0.0585994	-0.0152081	1	0.0643962	0.409349	0.782598
feature_16299	Ptprn2	0.187282	-0.737216	0.209951	0.390663	0.441511	0.123371	0.298174	-0.165985	0.92309
feature_18482	Sqle	0.0312136	1.86521	0.209951	0.00751275	-0.421784	1	0.009757	-0.580753	0.932315
feature_19417	Ccdc50	0.0195085	-1.45206	0.212488	0.0646096	0.147831	1	0.0632254	0.260181	0.96178
feature_19902	Rnaset2a	0.0156068	2.97141	0.212488	0.00150255	-0.378715	1	0.00234168	-1.25145	0.890853
feature_943	Gm10138	0.0195085	2.534	0.212998	0.0060102	0.59529	1	0.00312224	-1.62584	0.392329
feature_1020	Pappa2	0.0195085	2.534	0.212998	0	-2.08921	0.609212	0.00468336	-0.35836	1
feature_1657	Rxra	0.0195085	2.534	0.212998	0.0030051	-0.334321	1	0.0039028	-1.01441	0.892817
feature_2192	Cd82	0.039017	1.61706	0.212998	0.00751275	-0.978177	0.73178	0.0152209	-0.15191	1
feature_7774	Magi1	0.277021	-0.655313	0.212998	0.555943	0.481565	0.026456	0.410575	-0.22145	0.656113
feature_21970	Gna14	0.167773	-0.742835	0.212998	0.519882	1.24106	6.06014e-15	0.225192	-0.906242	4.86754e-09
feature_7102	Gm4876	0.0039017	-2.09198	0.214473	0.0105178	-1.5775	0.0359371	0.0386377	2.00009	0.000473821
feature_288	Gm10561	0.0078034	5.23444	0.214597	0	0.495754	1	0	-3.0588	0.649832
feature_5199	Epb41	0.039017	-1.14847	0.215203	0.0976657	0.153567	1	0.0936672	0.191124	1
feature_13762	Emid1	0.0117051	3.64948	0.216308	0	-0.726639	1	0.00117084	-1.47384	0.92309
feature_21469	Atp8b1	0.210692	-0.7023	0.216308	0.417709	0.39266	0.195216	0.329396	-0.130408	0.978228
feature_15204	Slc9a3r1	0.0468204	1.44303	0.216372	0.0030051	-2.4636	0.00953244	0.022246	0.477253	0.92309
feature_12574	Ipcef1	0.0156068	2.97141	0.216378	0	-1.50425	0.85551	0.00273196	-0.795766	1
feature_5776	Kmt2c	0.0897391	-0.876691	0.217594	0.172793	0.0900744	1	0.170552	0.182008	0.944353
feature_1848	Nr6a1os	0.0039017	-2.1187	0.219011	0.0180306	-0.833554	0.552499	0.0374669	1.31872	0.0349403
feature_12362	Smarcc1	0.0039017	-2.1187	0.219011	0.0390663	0.443286	0.93345	0.032003	0.0938469	1
feature_15232	Myo15b	0.0897391	1.06452	0.219803	0.0195331	-1.37872	0.015683	0.0507364	0.350132	0.92309
feature_60	Ube2w	0.0039017	-2.13188	0.222159	0.0285484	-0.120918	1	0.0351252	0.64164	0.626273
feature_9796	Fus	0.0624272	-1.00789	0.222159	0.150255	0.308475	0.85551	0.128012	0.0177414	1
feature_12191	Anapc13	0.0195085	2.534	0.222159	0.00450765	0.173826	1	0.00351252	-1.32183	0.726864
feature_13549	Grip1	0.0039017	-2.13188	0.222159	0.0420714	0.563658	0.768023	0.0316127	-0.0231762	1
feature_13826	Egfros	0	-2.72556	0.222159	0.0105178	-1.16721	0.330193	0.029271	1.77409	0.015431
feature_19021	Larp4	0.0039017	-2.13188	0.222159	0.030051	-0.0347609	1	0.0347349	0.558584	0.728037
feature_4527	Fbxo10	0.0156068	3.16406	0.223476	0.00150255	-0.241212	1	0.0019514	-1.47384	0.890853
feature_22604	Atp11c	0.0234102	-1.36971	0.223476	0.0781326	0.308791	0.976089	0.0679087	0.0947304	1
feature_14003	Adam19	0.0234102	2.20891	0.223633	0.00150255	-1.50425	0.678229	0.00663476	-0.303913	1
feature_18099	Dach1	0.0078034	-2.05096	0.223664	0.0540918	0.359432	1	0.0464433	0.147651	1
feature_3173	Fndc3b	0.0585255	-1.00515	0.224232	0.127717	0.127603	1	0.123719	0.180834	0.982825
feature_8156	Emp1	0.0273119	-1.26938	0.226941	0	-5.87929	1.61926e-17	0.0940575	3.44503	7.19582e-18
feature_14052	Sqstm1	0.0585255	1.27444	0.227509	0.0120204	-1.24121	0.183221	0.0288807	0.170019	1
feature_19905	Mpc1	0.039017	1.75136	0.227509	0.0060102	-1.15194	0.678229	0.0140501	-0.171275	1
feature_7571	Kcmf1	0.0273119	-1.27533	0.227605	0.07663	0.144531	1	0.0745435	0.228482	0.978228
feature_2472	Mal	0.0312136	2.01205	0.227885	0.00150255	-2.04857	0.327647	0.0101473	-0.0408782	1
feature_4708	Psip1	0	-2.55997	0.232742	0.0180306	-0.17304	1	0.0238071	0.779919	0.63681
feature_11809	Gm47271	0	-2.55997	0.232742	0.0180306	-0.17304	1	0.0238071	0.779919	0.63681
feature_19305	Dgcr8	0	-2.55997	0.232742	0.0210357	0.0807164	1	0.0230265	0.526162	0.92309
feature_19645	Adgrg7	0.0429187	-1.14059	0.232742	0.111189	0.238073	1	0.100302	0.111125	1
feature_1105	Gpa33	0.0897391	1.03477	0.2332	0.0330561	-0.605175	0.651016	0.0483947	-0.0316153	1
feature_5028	Guca2a	0.0819357	1.10891	0.233666	0.0240408	-0.887103	0.319169	0.0433211	0.0855898	1
feature_10206	1700041G16Rik	0.0078034	5.23444	0.233666	0	0.495754	1	0	-3.0588	0.663847
feature_14808	Slc35b1	0.0312136	2.01205	0.233666	0.00901529	-0.0188193	1	0.00819588	-0.921297	0.782598
feature_483	Gm28410	0	-2.57934	0.233843	0.0225382	0.173826	1	0.0230265	0.433053	0.957949
feature_4299	Chchd7	0.0195085	2.91252	0.234197	0.0030051	-0.0347609	1	0.00273196	-1.47384	0.726145
feature_7448	Herc3	0	-2.59845	0.238008	0.0195331	-0.0892086	1	0.0241974	0.696087	0.726864
feature_15862	9530018F02Rik	0.0117051	3.64948	0.238061	0.0030051	1.34375	1	0.00039028	-3.0588	0.190041
feature_22384	Fam45a	0	-2.57934	0.238061	0.0240408	0.285536	1	0.0226362	0.321343	1
feature_8575	Arhgef1	0.0546238	1.32755	0.239429	0.016528	-0.619723	0.85551	0.0245876	-0.174277	1
feature_11614	Atp5l	0.0546238	1.32755	0.239429	0.0285484	0.273361	1	0.0214654	-0.753946	0.412143
feature_16827	H2afy	0.0546238	1.32755	0.239429	0.0240408	-0.0216454	1	0.0226362	-0.545391	0.799801
feature_15457	Pum2	0.0195085	-1.39491	0.24158	0.0646096	0.21822	1	0.0601031	0.187577	1
feature_22297	Gm16068	0	-2.6173	0.241927	0.0135229	-0.684818	0.85551	0.0261488	1.2917	0.130233
feature_3539	Syt11	0.0117051	4.06452	0.242929	0.0030051	1.66568	0.946979	0	-4.0588	0.117014
feature_13646	Naca	0.039017	1.61706	0.242929	0.0180306	0.354891	1	0.012489	-0.953005	0.414724
feature_22785	Abcb7	0.0117051	-1.59845	0.242929	0.0661122	0.778154	0.196932	0.04176	-0.303913	0.957949
feature_6100	Gm10135	0	-2.63592	0.248911	0.0195331	-0.134297	1	0.0249779	0.741175	0.672047
feature_7068	Sem1	0.0546238	1.30845	0.252931	0.0180306	-0.504246	0.93345	0.0245876	-0.228725	1
feature_19540	Ndufb4	0.0273119	2.00563	0.252931	0.00751275	-0.0892086	1	0.00741532	-0.852349	0.890853
feature_17634	Styx	0.0117051	-1.63592	0.25353	0.0345586	-0.421784	0.85551	0.051517	0.826557	0.184357
feature_19885	Ezr	0.148265	0.821142	0.25353	0.0555943	-0.790297	0.0938647	0.093277	0.185125	1
feature_10783	Fto	0.0546238	-1.00968	0.254215	0.144245	0.46631	0.396374	0.110059	-0.123595	1
feature_1561	Mrpl41	0.0117051	3.64948	0.255442	0	-0.726639	1	0.00117084	-1.47384	0.92309
feature_13437	Cep290	0.0312136	1.77501	0.255442	0.0105178	-0.00674648	1	0.009757	-0.773398	0.872929
feature_18797	Smdt1	0.0351153	1.64948	0.255442	0.00901529	-0.538193	1	0.0128792	-0.386375	1
feature_22651	Ssr4	0.0351153	1.64948	0.255442	0.00901529	-0.538193	1	0.0128792	-0.386375	1
feature_7639	Tex261	0.0234102	2.13491	0.257303	0.0030051	-0.919284	0.900809	0.00663476	-0.473838	1
feature_4567	Erp44	0.0078034	-1.80995	0.259721	0.030051	-0.359856	1	0.0433211	0.809955	0.305489
feature_13760	Ewsr1	0.0429187	-1.08297	0.260229	0.0946606	0.0200204	1	0.0995214	0.297344	0.890853
feature_10552	Rpl18a	0.0429187	1.45308	0.261072	0.0255433	0.635932	0.85551	0.0144404	-1.08389	0.168051
feature_8328	Rpl28	0.039017	1.61706	0.261605	0.0315535	1.45269	0.0747428	0.00897644	-1.88888	0.00164862
feature_14881	Rpl23	0.0663289	1.17555	0.261605	0.046579	0.654452	0.589236	0.0265391	-0.980023	0.0498854
feature_3051	Rps21	0.0741323	1.15123	0.261953	0.0781326	1.48671	0.000291321	0.0234168	-1.71303	1.00239e-06
feature_4327	Trp53inp1	0.0039017	-2.00873	0.261953	0.00901529	-1.69689	0.034798	0.0366863	2.09602	0.000395989
feature_7461	Grid2	0.0039017	-2.00873	0.261953	0.0270459	-0.0636736	1	0.032003	0.579274	0.7506
feature_11913	Gm15563	0.0039017	-2.00873	0.261953	0.016528	-0.842116	0.571728	0.0347349	1.31758	0.0440623
feature_13507	5330438D12Rik	0.0273119	-1.23316	0.261953	0.0616045	-0.185178	1	0.0757143	0.518783	0.465779
feature_16147	Setd3	0.0078034	-1.76556	0.261953	0.0435739	0.329395	1	0.0382475	0.155519	1
feature_20616	Hsp90ab1	0.0546238	1.28959	0.261953	0.0495841	1.3102	0.0176258	0.016782	-1.59937	0.0001631
feature_18088	Diaph3	0.0039017	-2.19601	0.264174	0.0510867	0.852447	0.314642	0.0312224	-0.303913	1
feature_14948	Eif1	0.0858374	1.16182	0.26516	0.0285484	-0.64175	0.738839	0.0425405	-0.0847954	1
feature_20884	Birc6	0.0897391	-0.858313	0.265401	0.156265	-0.066125	1	0.172114	0.314065	0.644918
feature_4216	Ddah1	0.0156068	-1.45485	0.266252	0.0721224	0.695426	0.267009	0.0480045	-0.247562	1
feature_862	Elf3	0.078034	1.06452	0.267202	0.0450765	0.176932	1	0.0370766	-0.5613	0.52549
feature_12072	Dop1a	0.0156068	-1.46322	0.267202	0.0570969	0.247178	1	0.0522975	0.176713	1
feature_21208	Ube2d2a	0.0156068	-1.46322	0.267202	0.0510867	0.050128	1	0.0538587	0.359701	0.92309
feature_295	Satb2	0.292628	-0.640779	0.269285	0.489831	0.1624	0.939813	0.452725	0.0562629	1
feature_6588	Arpc3	0.039017	1.52395	0.269285	0.0060102	-1.35224	0.374648	0.016782	0.0787034	1
feature_12426	Rbms3	0.0078034	-1.79898	0.270189	0.0195331	-1.01882	0.215914	0.0456628	1.40881	0.0069324
feature_16036	Cep128	0.0078034	-1.79898	0.270189	0.0661122	1.09684	0.0218284	0.0335641	-0.585483	0.565855
feature_6194	Ankrd17	0.105346	-0.802906	0.273853	0.183311	0.00642258	1	0.191237	0.236923	0.880482
feature_6512	Vsig10	0.039017	1.61706	0.274184	0.0195331	0.495754	1	0.0120987	-1.0588	0.344855
feature_3559	Krtcap2	0.0273119	1.89459	0.274342	0.0105178	0.325829	1	0.00741532	-1.0588	0.575718
feature_9952	Irf7	0.0273119	1.89459	0.274342	0.00901529	0.0807164	1	0.0078056	-0.888875	0.782598
feature_18143	Gm10076	0.0273119	1.89459	0.274342	0.0030051	-1.33432	0.690049	0.00936672	-0.15191	1
feature_19630	Alcam	0.078034	-0.894838	0.274342	0.139737	-0.0685984	1	0.154551	0.326268	0.638147
feature_4417	Orc3	0.0039017	-2.06476	0.275143	0.0195331	-0.651088	0.741077	0.0355155	1.14283	0.111358
feature_1515	Dnajc1	0.0663289	-0.925427	0.27518	0.15326	0.340952	0.733282	0.127231	-0.0275814	1
feature_4100	Ostc	0.0468204	1.49194	0.27518	0.016528	-0.216964	1	0.0179529	-0.504211	0.925591
feature_4698	Mpdz	0.0351153	1.61386	0.27518	0.0105178	-0.345548	1	0.0128792	-0.473838	0.983189
feature_18306	Dap	0.0351153	1.61386	0.27518	0.0105178	-0.345548	1	0.0128792	-0.473838	0.983189
feature_20960	Camkmt	0.0585255	-0.954144	0.277036	0.123209	0.124839	1	0.119426	0.173547	1
feature_11957	Tcf12	0.124854	-0.765555	0.277378	0.205849	-0.0371714	1	0.220899	0.263976	0.736252
feature_482	Sgpp2	0.0624272	-0.94605	0.27812	0.175798	0.687235	0.0263168	0.114352	-0.340254	0.619001
feature_18629	Slc39a4	0.0312136	1.73194	0.27812	0.00450765	-1.20469	0.683225	0.0117084	-0.104604	1
feature_9225	Iqgap1	0.0429187	-1.19601	0.278316	0.132224	0.490361	0.508228	0.0999117	-0.112069	1
feature_19177	Abat	0.0624272	1.22915	0.279473	0.0525892	1.08072	0.0626317	0.0214654	-1.36692	0.00100828
feature_5964	Cd38	0.0936408	-0.825603	0.282137	0.162275	-0.0337424	1	0.174455	0.278235	0.753694
feature_10006	Kcnq1ot1	0.0507221	-1.01077	0.282137	0.120204	0.255659	0.93345	0.106546	0.0696056	1
feature_3707	Mrps21	0.0312136	1.91252	0.282463	0.0030051	-1.50425	0.591153	0.0105376	-0.125914	1
feature_7198	Mkln1	0.0507221	-1.01484	0.283004	0.0856453	-0.342073	0.85551	0.115913	0.595584	0.148532
feature_18938	Scaf11	0.0195085	-1.35801	0.283004	0.0585994	0.0897615	1	0.0597129	0.301096	0.92309
feature_4049	1810037I17Rik	0.0546238	1.25259	0.286212	0.00901529	-1.55487	0.0848142	0.0281002	0.323669	1
feature_7559	Vamp8	0.0312136	1.86521	0.289029	0.00901529	-0.156323	1	0.00936672	-0.736872	0.892817
feature_3083	Arfrp1	0.0234102	2.06452	0.289692	0.0030051	-0.978177	0.906686	0.00702504	-0.395835	1
feature_490	Utp14b	0.0468204	1.49194	0.2898	0.00751275	-1.35669	0.374648	0.0202946	0.0841578	1
feature_533	Sp110	0.0195085	2.534	0.2898	0.00450765	0.173826	1	0.00351252	-1.32183	0.782598
feature_1029	Rabgap1l	0.148265	-0.716167	0.2898	0.297505	0.386424	0.307537	0.236119	-0.119407	1
feature_1288	Ephx1	0.0117051	3.32755	0.2898	0.00450765	1.75879	0.85551	0.00039028	-3.28119	0.0875673
feature_1598	Rabl6	0	-2.45904	0.2898	0.0210357	0.206247	1	0.0210751	0.400631	0.983189
feature_5426	Vps13d	0.0663289	-0.93548	0.2898	0.121706	-0.0852936	1	0.136598	0.352133	0.634534
feature_5898	Sh3bp2	0.0195085	2.32755	0.2898	0.00450765	-0.00674648	1	0.00429308	-1.0588	0.794304
feature_6240	Cnot6l	0.0117051	-1.6634	0.2898	0.046579	0.0472934	1	0.0495656	0.396879	0.92309
feature_6890	Lfng	0.0117051	3.32755	0.2898	0.00450765	1.75879	0.85551	0.00039028	-3.28119	0.0875673
feature_7370	Hnrnpa2b1	0.101444	-0.853018	0.2898	0.192326	0.0975902	1	0.188505	0.168901	0.983189
feature_9538	1600010M07Rik	0.0117051	-1.55997	0.2898	0.0450765	0.116049	1	0.0456628	0.321343	0.92309
feature_9876	Insyn2a	0	-2.45904	0.2898	0.0120204	-0.680096	0.85551	0.0234168	1.28697	0.18737
feature_11949	Lipc	0.0117051	3.32755	0.2898	0	-0.919284	1	0.00156112	-1.15191	1
feature_14055	Gm26542	0	-2.70807	0.2898	0.0105178	-1.1481	0.476566	0.0288807	1.75498	0.0298169
feature_14172	2210407C18Rik	0.0117051	3.32755	0.2898	0.00450765	1.75879	0.85551	0.00039028	-3.28119	0.0875673
feature_16182	Hsp90aa1	0.0429187	1.50652	0.2898	0.0195331	0.215646	1	0.0152209	-0.795766	0.635178
feature_16230	Pld4	0.0117051	3.32755	0.2898	0	-0.919284	1	0.00156112	-1.15191	1
feature_17226	Rnf180	0	-2.43798	0.2898	0.030051	0.888071	0.488603	0.0183432	-0.281193	1
feature_17276	Gzma	0.0117051	3.32755	0.2898	0.00150255	0.273361	1	0.00117084	-1.79577	0.693651
feature_18486	Trib1	0.0351153	1.61386	0.2898	0.0030051	-1.91928	0.198207	0.0148306	0.226602	1
feature_18781	Pmm1	0.0117051	3.32755	0.2898	0.00150255	0.273361	1	0.00117084	-1.79577	0.693651
feature_20277	Pim1	0.0195085	2.32755	0.2898	0	-2.24121	0.488603	0.00546392	-0.15191	1
feature_20738	Lrg1	0.0117051	3.32755	0.2898	0.00450765	1.75879	0.85551	0.00039028	-3.28119	0.0875673
feature_20823	Themis3	0.0741323	1.08877	0.2898	0.016528	-1.3116	0.0494719	0.0413697	0.313433	0.958957
feature_7270	Braf	0.0117051	-1.58892	0.298565	0.0315535	-0.515134	0.82581	0.0503461	0.904674	0.12467
feature_12004	Tinag	0	-2.95043	0.298886	0.0345586	0.456225	1	0.0284905	0.150653	1
feature_755	Ccnt2	0.0234102	-1.34406	0.301237	0.0631071	-0.0399133	1	0.0702504	0.411298	0.791836
feature_3338	Nbea	0.0273119	-1.2085	0.301237	0.0706198	0.0807164	1	0.0718115	0.276184	0.92309
feature_5496	Ctnnbip1	0.0312136	1.69012	0.301237	0.00901529	-0.321382	1	0.0109278	-0.522747	0.957949
feature_10818	Herpud1	0.0819357	1.04282	0.301237	0.0525892	0.343751	1	0.0382475	-0.677371	0.268616
feature_13577	Srgap1	0.0702306	-0.897006	0.301237	0.171291	0.483263	0.268184	0.128402	-0.162798	1
feature_14390	Eif5a	0.0234102	2.13491	0.301237	0.00751275	0.273361	1	0.00546392	-1.15191	0.672194
feature_14625	Myo1d	0.339448	-0.588923	0.301237	0.455272	-0.16821	0.934478	0.52961	0.322405	0.260998
feature_18445	Deptor	0.0351153	-1.16814	0.301237	0.0976657	0.304932	0.91617	0.0843005	0.0588949	1
feature_9341	Ndufc2	0.0273119	2.06452	0.301307	0.0060102	-0.352243	1	0.00741532	-0.736872	0.92309
feature_15942	Gm46367	0	-2.52044	0.301307	0.00901529	-1.15632	0.4255	0.0253682	1.7632	0.0248896
feature_16010	Cipc	0	-2.52044	0.301307	0.0225382	0.247826	1	0.0218557	0.359052	0.999867
feature_17118	Wdr41	0	-2.52044	0.301307	0.0345586	1.05097	0.263506	0.0187334	-0.44409	0.944966
feature_10657	Inpp4b	0.0663289	-0.911912	0.30242	0.0871478	-0.621603	0.164958	0.142843	0.797871	0.00684214
feature_8693	Map4k1	0.0156068	2.80149	0.303399	0.00150255	-0.504246	1	0.00273196	-1.0588	0.983189
feature_2452	Usp50	0.0039017	-2.2085	0.305778	0.0360612	0.185414	1	0.0355155	0.349285	1
feature_5739	Srpk2	0.0078034	-1.68442	0.305778	0.0330561	-0.0539332	1	0.0382475	0.511663	0.782598
feature_10364	Sorbs2	0.0585255	-0.939233	0.305778	0.130722	0.250129	0.91617	0.115913	0.0588303	1
feature_10949	Dus2	0.0195085	2.32755	0.305778	0.0030051	-0.504246	1	0.00468336	-0.773398	0.963224
feature_13280	Appl2	0.0663289	-0.918685	0.305778	0.126214	-0.0017458	1	0.133476	0.275802	0.833554
feature_15599	Cog5	0.0585255	-0.942975	0.305778	0.117199	0.0491068	1	0.119816	0.23836	0.92309
feature_21038	Wac	0.0507221	-0.973616	0.306241	0.0706198	-0.615092	0.255663	0.115913	0.814594	0.0145248
feature_4169	Tspan5	0.0078034	-1.69629	0.306325	0.046579	0.541558	0.765354	0.0351252	-0.0535058	1
feature_10173	Mcph1	0.0078034	-1.69629	0.306325	0.0525892	0.774908	0.323228	0.0335641	-0.278822	1
feature_20312	Slc37a1	0.13656	-0.733262	0.307097	0.280977	0.408893	0.261687	0.219728	-0.135186	1
feature_3700	Mcl1	0.0819357	1.02145	0.307538	0.030051	-0.624998	0.660867	0.0448822	-0.00817407	1
feature_5855	Babam2	0.0429187	-1.03234	0.307538	0.0646096	-0.568376	0.3991	0.103034	0.794651	0.0298169
feature_6960	Atp5j2	0.0507221	1.28691	0.307538	0.0240408	0.0596547	1	0.0214654	-0.573373	0.782598
feature_7756	Chchd4	0.0195085	2.42709	0.307538	0.00450765	0.0807164	1	0.0039028	-1.18433	0.791836
feature_10697	Gm26532	0.0273119	2.12592	0.307538	0	-2.82617	0.242451	0.00858616	0.0497243	1
feature_16862	Golm1	0.0468204	-1.00763	0.307538	0.109686	0.229474	1	0.0991312	0.094251	1
feature_1630	Agpat2	0.0156068	2.64948	0.307741	0.00150255	-0.619723	1	0.00312224	-0.888875	0.983189
feature_20543	Trim15	0.0156068	2.64948	0.307741	0.00150255	-0.619723	1	0.00312224	-0.888875	0.983189
feature_13649	Atp5b	0.0663289	1.13291	0.308667	0.0360612	0.13961	1	0.0304419	-0.562374	0.674894
feature_4605	Tmem245	0.0156068	-1.42947	0.309444	0.0585994	0.336555	0.989036	0.0503461	0.0890985	1
feature_2566	Chgb	0.0117051	3.32755	0.310036	0	-0.919284	1	0.00156112	-1.15191	1
feature_4621	Ecpas	0.0507221	-0.994374	0.310036	0.129219	0.409918	0.580064	0.102644	-0.0732997	1
feature_13169	Ndufs7	0.0195085	2.42709	0.310036	0.0030051	-0.421784	1	0.00429308	-0.888875	0.957949
feature_17090	Msh3	0.0039017	-1.92037	0.311815	0.0270459	0.0432417	1	0.0296613	0.471021	0.904186
feature_1279	Gm37768	0.0078034	-1.73134	0.312327	0.0495841	0.61359	0.648773	0.0355155	-0.120201	1
feature_11390	Tmem205	0.0156068	2.80149	0.312327	0.0060102	1.23272	1	0.00156112	-2.32183	0.180397
feature_11450	Aplp2	0.0741323	1.05255	0.312327	0.0375637	-0.064334	1	0.0370766	-0.380728	0.92309
feature_14075	Phykpl	0.0039017	-2.07844	0.312327	0.0330561	0.194887	1	0.0323933	0.333517	1
feature_18339	Vps13b	0.191183	-0.665214	0.312327	0.326053	0.157157	1	0.303248	0.0690928	1
feature_19720	Atp5j	0.0351153	1.54515	0.312327	0.00901529	-0.635491	0.91617	0.0140501	-0.264384	1
feature_1169	Tstd1	0.0234102	1.99741	0.312674	0.0030051	-1.03476	0.85551	0.00741532	-0.321835	1
feature_4972	Plk3	0.0234102	1.99741	0.312674	0	-2.72664	0.183221	0.00819588	0.178239	1
feature_8286	Tmc4	0.0741323	1.04067	0.312674	0.0360612	-0.145792	1	0.0378572	-0.318559	0.932315
feature_13221	Zfr2	0.0234102	1.99741	0.312674	0.00450765	-0.56314	1	0.00702504	-0.547838	1
feature_21590	Atp9b	0.0195085	-1.54034	0.315206	0.0796351	0.417751	0.85551	0.0643962	0.0185587	1
feature_22808	2610002M06Rik	0.0234102	1.99741	0.31979	0.00901529	0.42864	1	0.0058542	-1.17428	0.575718
feature_4311	Tox	0.241905	-0.684986	0.320839	0.366622	-0.0714339	1	0.400427	0.268288	0.643844
feature_922	Glrx2	0.0234102	2.06452	0.321102	0.00901529	0.495754	1	0.00546392	-1.26739	0.579374
feature_14275	2410006H16Rik	0.0234102	2.20891	0.321119	0.0060102	0.010327	1	0.00546392	-1.02638	0.823153
feature_18361	Zfp706	0.0312136	1.64948	0.321729	0.0105178	-0.128737	1	0.0109278	-0.615857	0.92309
feature_16992	Mrpl36	0.0156068	2.80149	0.322566	0.00150255	-0.504246	1	0.00273196	-1.0588	0.983189
feature_8452	Calm3	0.039017	1.58535	0.322826	0.00901529	-0.755785	0.910441	0.0152209	-0.239372	1
feature_12830	Sec63	0.039017	-1.14375	0.322826	0.100671	0.213983	1	0.0924964	0.135578	1
feature_13373	Fgd6	0.0039017	-1.97987	0.322826	0.0225382	-0.328675	1	0.0323933	0.831017	0.417778
feature_9758	Zfp768	0.0117051	3.32755	0.323078	0	-0.919284	1	0.00156112	-1.15191	1
feature_12977	Dna2	0.0195085	2.23444	0.323078	0.0030051	-0.582249	1	0.00507364	-0.666483	1
feature_22279	As3mt	0.0195085	2.23444	0.323078	0	-2.3116	0.401278	0.0058542	-0.0588001	1
feature_9413	Fchsd2	0.132658	-0.721081	0.324443	0.15326	-0.590335	0.0722246	0.242364	0.708901	0.00217117
feature_20187	Cuta	0.0156068	2.64948	0.327574	0.00150255	-0.619723	1	0.00312224	-0.888875	0.988373
feature_8668	Gmfg	0.0117051	3.32755	0.333443	0	-0.919284	1	0.00156112	-1.15191	1
feature_22778	Tsix	0.0468204	-1.12986	0.33566	0.0811377	-0.437132	0.769784	0.117865	0.703247	0.141693
feature_7353	Tra2a	0.0429187	-1.1187	0.34282	0.0796351	-0.319214	0.91617	0.106546	0.601827	0.260998
feature_5796	Ube3c	0.0195085	-1.4798	0.343769	0.0555943	-0.14709	1	0.0671282	0.534526	0.647521
feature_13698	Mettl7b	0.0312136	1.73194	0.346245	0.00751275	-0.543775	1	0.0109278	-0.423212	1
feature_1708	Phyhd1	0.0078034	4.23444	0.346489	0	0.0807164	1	0.00039028	-2.0588	0.890853
feature_1806	Psmd5	0.0234102	1.93328	0.346489	0.0030051	-1.08921	0.85551	0.0078056	-0.251445	1
feature_1817	Stom	0.0234102	1.93328	0.346489	0.0120204	0.858324	0.921708	0.00546392	-1.47384	0.224628
feature_2426	Bloc1s6os	0.0078034	4.23444	0.346489	0	0.0807164	1	0.00039028	-2.0588	0.890853
feature_3605	Slc27a3	0.0078034	4.23444	0.346489	0	0.0807164	1	0.00039028	-2.0588	0.890853
feature_4110	Papss1	0.0624272	1.10759	0.346489	0.0360612	0.216778	1	0.0288807	-0.602571	0.594722
feature_5318	C1qc	0.0078034	4.23444	0.346489	0.00150255	1.49575	1	0	-3.47384	0.333603
feature_5407	Efhd2	0.039017	1.40847	0.346489	0.0150255	-0.160292	1	0.0160015	-0.473838	0.92309
feature_6185	Jchain	0.0273119	1.94904	0.346489	0.00450765	-0.826174	1	0.00858616	-0.409707	1
feature_6202	Rassf6	0.0273119	-1.30471	0.346489	0.0826402	0.244215	1	0.0749338	0.141339	1
feature_9013	Tph1	0.0078034	4.23444	0.346489	0	0.0807164	1	0.00039028	-2.0588	0.890853
feature_11137	Cyba	0.0195085	2.32755	0.346489	0.00150255	-1.16721	0.964369	0.00507364	-0.473838	1
feature_11175	Def8	0.0078034	4.23444	0.346489	0	0.0807164	1	0.00039028	-2.0588	0.890853
feature_12092	Bcl2a1d	0.0078034	4.23444	0.346489	0	0.0807164	1	0.00039028	-2.0588	0.890853
feature_12555	Iyd	0.0078034	4.23444	0.346489	0	0.0807164	1	0.00039028	-2.0588	0.890853
feature_13047	Ggt1	0.0078034	4.23444	0.346489	0	0.0807164	1	0.00039028	-2.0588	0.890853
feature_13792	Myo1g	0.0078034	4.23444	0.346489	0	0.0807164	1	0.00039028	-2.0588	0.890853
feature_14110	Il4	0.0078034	4.23444	0.346489	0	0.0807164	1	0.00039028	-2.0588	0.890853
feature_14134	Ccdc69	0.0078034	4.23444	0.346489	0	0.0807164	1	0.00039028	-2.0588	0.890853
feature_14542	Slc6a4	0.0078034	4.23444	0.346489	0.00150255	1.49575	1	0	-3.47384	0.333603
feature_15196	Cd300lb	0.0078034	4.23444	0.346489	0	0.0807164	1	0.00039028	-2.0588	0.890853
feature_15610	Sypl	0.0078034	-1.76556	0.346489	0.0510867	0.625037	0.68172	0.0362961	-0.128702	1
feature_16483	Hist1h4h	0.0078034	4.23444	0.346489	0	0.0807164	1	0.00039028	-2.0588	0.890853
feature_16661	Tmem14c	0.0234102	1.93328	0.346489	0.0060102	-0.241212	1	0.00702504	-0.685342	0.935399
feature_17851	Cryl1	0.0078034	-2.20018	0.346489	0.0585994	0.315182	1	0.0519073	0.199934	1
feature_18074	Mtrf1	0.0078034	4.23444	0.346489	0	0.0807164	1	0.00039028	-2.0588	0.890853
feature_18604	Eppk1	0.0234102	1.93328	0.346489	0.00450765	-0.619723	1	0.00741532	-0.473838	1
feature_18824	Tspo	0.0234102	1.93328	0.346489	0.0120204	0.858324	0.921708	0.00546392	-1.47384	0.224628
feature_18909	Slc2a13	0.0741323	-0.867794	0.346489	0.193829	0.660141	0.0306022	0.128012	-0.331062	0.627168
feature_18947	Rapgef3	0.0468204	1.32755	0.346489	0.0270459	0.446001	1	0.0179529	-0.873445	0.315897
feature_20409	Tap1	0.0312136	1.60995	0.346489	0.0150255	0.410865	1	0.0101473	-0.966878	0.534538
feature_21359	Gm49974	0.0078034	4.23444	0.346489	0	0.0807164	1	0.00039028	-2.0588	0.890853
feature_21687	2010003K11Rik	0.0078034	4.23444	0.346489	0	0.0807164	1	0.00039028	-2.0588	0.890853
feature_21757	Frmd8os	0.0078034	4.23444	0.346489	0	0.0807164	1	0.00039028	-2.0588	0.890853
feature_8949	Pih1d1	0.0156068	2.64948	0.354639	0.00150255	-0.619723	1	0.00312224	-0.888875	1
feature_10143	Grtp1	0.0468204	1.30553	0.354639	0.0120204	-0.878642	0.651814	0.022246	-0.00817407	1
feature_14396	Gabarap	0.0468204	1.30553	0.354639	0.0060102	-1.80681	0.0559262	0.0238071	0.392896	0.970277
feature_4939	Uqcrh	0.0546238	1.27097	0.357809	0.0180306	-0.540772	0.922385	0.0253682	-0.184331	1
feature_1137	Atf6	0.0156068	-1.36844	0.358871	0.046579	0.00390076	1	0.0507364	0.38966	0.885967
feature_465	Dnpep	0.0156068	2.51198	0.359077	0.0060102	0.943213	1	0.00234168	-1.83641	0.303956
feature_921	B3galt2	0	-2.37289	0.359077	0.00751275	-1.24121	0.374648	0.0230265	1.84809	0.0298169
feature_2653	Cst3	0.0195085	2.534	0.359077	0.0030051	-0.334321	1	0.0039028	-1.01441	0.92309
feature_4813	Insl5	0.0156068	2.51198	0.359077	0.00150255	-0.726639	1	0.00351252	-0.736872	1
feature_6025	0610040J01Rik	0.0663289	-0.870591	0.359077	0.150255	0.372606	0.644339	0.121767	-0.0664618	1
feature_6653	Tmed2	0.0585255	1.15763	0.359077	0.0330561	0.229239	1	0.0261488	-0.634302	0.600074
feature_7189	Copg2	0.0156068	-1.37732	0.359077	0.046579	-0.00674648	1	0.0511267	0.400631	0.887631
feature_8030	Mrpl51	0.0156068	2.80149	0.359077	0.0060102	1.23272	1	0.00156112	-2.32183	0.206274
feature_15753	Mis18bp1	0	-2.35052	0.359077	0.0180306	0.0807164	1	0.0199043	0.526162	0.92309
feature_16110	Ifi27l2b	0.0702306	1.03943	0.359077	0.0375637	0.0129718	1	0.0351252	-0.425475	0.890052
feature_16412	Tcrg-C4	0.0078034	4.23444	0.359077	0	0.0807164	1	0.00039028	-2.0588	0.890853
feature_16704	Gmpr	0.0156068	2.51198	0.359077	0	-1.82617	0.73178	0.0039028	-0.336334	1
feature_17814	Tinf2	0.0156068	2.51198	0.359077	0.0030051	-0.0347609	1	0.00312224	-1.11127	0.92309
feature_18450	Sntb1	0.0156068	2.51198	0.359077	0.0060102	0.943213	1	0.00234168	-1.83641	0.303956
feature_19211	2610020C07Rik	0.0078034	-1.61105	0.359077	0.0255433	-0.393215	1	0.0378572	0.818944	0.343602
feature_19485	Rpl35a	0.0507221	1.41244	0.359077	0.0330561	0.771388	0.68172	0.016782	-1.18433	0.0875673
feature_19488	Snx4	0	-2.37289	0.359077	0.0330561	1.17801	0.156161	0.0163918	-0.571135	0.890853
feature_20852	Lpin2	0.0624272	-0.87408	0.361178	0.0360612	-1.85663	1.12194e-08	0.142843	1.68825	1.41099e-10
feature_2965	Bcas1os2	0	-2.39491	0.361837	0.0255433	0.635932	0.85551	0.0187334	-0.0290528	1
feature_3703	Tars2	0.0195085	2.14698	0.361837	0.0105178	1.17383	0.7665	0.00351252	-1.85235	0.15508
feature_4670	Tnfsf15	0.0117051	3.06452	0.361837	0	-1.08921	1	0.0019514	-0.888875	1
feature_5272	Mtfr1l	0.0117051	3.06452	0.361837	0.00150255	0.0807164	1	0.00156112	-1.47384	0.92309
feature_6106	Cwh43	0.0117051	3.06452	0.361837	0.00450765	1.49575	0.85551	0.00078056	-2.69623	0.175609
feature_12687	4930455C13Rik	0	-2.39491	0.361837	0.00901529	-1.01882	0.551819	0.0230265	1.6257	0.0688382
feature_13124	Plpp2	0.0195085	2.14698	0.361837	0.00751275	0.578216	1	0.00429308	-1.34831	0.545973
feature_13769	Mrps24	0.0156068	2.64948	0.361837	0.0030051	0.0807164	1	0.00273196	-1.28119	0.814359
feature_18246	Lmbrd2	0.0039017	-1.93548	0.361837	0.0195331	-0.504246	0.921742	0.032003	0.994311	0.286822
feature_20451	Hspa1b	0.0117051	3.06452	0.361837	0	-1.08921	1	0.0019514	-0.888875	1
feature_21171	Pkd2l2	0	-2.39491	0.361837	0.0120204	-0.60734	0.91617	0.022246	1.21422	0.221062
feature_22014	Apba1	0.0117051	3.06452	0.361837	0.00150255	0.0807164	1	0.00156112	-1.47384	0.92309
feature_22048	Plpp6	0.0117051	3.06452	0.361837	0.00150255	0.0807164	1	0.00156112	-1.47384	0.92309
feature_4316	Chd7	0.0585255	-0.89355	0.364381	0.114194	0.0621007	1	0.115523	0.21692	0.9292
feature_15143	Gm11655	0	-2.74284	0.367122	0.0315535	0.562868	0.916976	0.0241974	0.0440107	1
feature_4371	Gm12353	0.0078034	-1.66037	0.367196	0.0255433	-0.449798	0.91617	0.0394183	0.87666	0.23819
feature_2996	Gm20721	0	-2.41661	0.36912	0.00751275	-1.28852	0.381452	0.0238071	1.8954	0.0236242
feature_12132	Atr	0	-2.41661	0.36912	0.0315535	1.01659	0.308144	0.0175626	-0.409707	0.983189
feature_14685	Tada2a	0	-2.41661	0.36912	0.0315535	1.01659	0.308144	0.0175626	-0.409707	0.983189
feature_11927	C2cd4b	0.0312136	1.57148	0.369407	0.0135229	0.193191	1	0.0109278	-0.785782	0.726864
feature_13873	Usp34	0.101444	-0.763049	0.369407	0.171291	-0.00157155	1	0.179529	0.235234	0.890853
feature_17156	Arhgef28	0.117051	-0.727239	0.369407	0.186316	-0.0567872	1	0.202555	0.272406	0.721958
feature_21370	Dmxl1	0.039017	-1.21752	0.369407	0.0721224	-0.449232	0.85551	0.106156	0.736276	0.162848
feature_1761	Naif1	0.0078034	4.23444	0.370085	0	0.0807164	1	0.00039028	-2.0588	0.892817
feature_8125	Styk1	0.0741323	-0.917333	0.373769	0.129219	-0.145225	1	0.151038	0.398155	0.594196
feature_11622	Mpzl3	0.0312136	1.73194	0.376017	0.0120204	0.163179	1	0.009757	-0.860861	0.771496
feature_16738	Ninj1	0.0078034	4.23444	0.376017	0.00150255	1.49575	1	0	-3.47384	0.354841
feature_339	Nbeal1	0.0468204	-0.949286	0.377167	0.0916555	-0.0203698	1	0.0987409	0.305394	0.855274
feature_5283	Clic4	0.0468204	1.26246	0.378667	0.0195331	-0.178018	1	0.0210751	-0.392918	0.978228
feature_17721	Hnrnpc	0.0507221	-0.944042	0.379743	0.0991682	-0.00801256	1	0.105766	0.291697	0.890853
feature_7287	Trbc2	0.0078034	4.23444	0.380061	0	0.0807164	1	0.00039028	-2.0588	0.893841
feature_21103	Rnf138	0.039017	1.46506	0.380126	0.0105178	-0.647204	0.91617	0.0163918	-0.217498	1
feature_9400	Ucp2	0.0273119	1.69529	0.380187	0.0060102	-0.684818	1	0.0101473	-0.303913	1
feature_16900	Ptch1	0.0273119	1.69529	0.380187	0.0105178	0.12652	1	0.00897644	-0.795766	0.830685
feature_883	Mroh3	0.0039017	-1.87408	0.380585	0.0360612	0.616048	0.836502	0.0261488	-0.0868145	1
feature_6115	Scfd2	0.0234102	-1.2085	0.380585	0.0525892	-0.192302	1	0.0651768	0.526162	0.533205
feature_7335	Gimap9	0.0156068	2.51198	0.381267	0	-1.82617	0.738839	0.0039028	-0.336334	1
feature_18067	Dgkh	0.039017	-1.00483	0.381267	0.0646096	-0.390589	0.823334	0.0909353	0.64164	0.166954
feature_21736	Cfl1	0.0312136	1.69012	0.381267	0.0060102	-0.882758	0.892661	0.0117084	-0.220081	1
feature_2146	Celf1	0.0468204	-0.967491	0.382064	0.100671	0.123785	1	0.0979603	0.181514	1
feature_1979	Ubr3	0.0351153	-1.03982	0.382425	0.0676147	-0.190138	1	0.0827394	0.479512	0.501152
feature_2032	Lnpk	0.0039017	-1.88968	0.382701	0.0360612	0.59529	0.845045	0.0265391	-0.0657529	1
feature_4973	Rps8	0.0702306	1.22498	0.382701	0.0315535	-0.0892086	1	0.0312224	-0.455916	0.92309
feature_7057	Ppp1r9a	0.039017	-1.01521	0.382701	0.0841427	0.0494202	1	0.0866422	0.260973	0.92309
feature_13376	Tmcc3	0.0936408	0.901021	0.382701	0.0360612	-0.667745	0.481991	0.0558101	0.0813775	1
feature_13788	Ppia	0.039017	1.46506	0.382701	0.0150255	-0.103708	1	0.0152209	-0.544227	0.92309
feature_15362	Alyref	0.0156068	2.97141	0.382701	0.00150255	-0.378715	1	0.00234168	-1.25145	0.92309
feature_6048	Rpl9	0.0468204	1.41918	0.383481	0.0180306	-0.149581	1	0.0187334	-0.502984	0.92309
feature_16192	Rcor1	0.0312136	-1.09348	0.383481	0.103676	0.718146	0.104168	0.0667379	-0.332975	0.857286
feature_18472	Fer1l6	0.0429187	-0.994374	0.383481	0.0856453	-0.0499873	1	0.0944478	0.34245	0.782598
feature_21920	Ms4a8a	0.241905	0.593339	0.383481	0.208854	0.405868	0.399056	0.149868	-0.543334	0.0386368
feature_12972	Ddx50	0.0936408	0.927016	0.385983	0.060102	0.2191	1	0.0483947	-0.530421	0.538159
feature_1860	Gtdc1	0.0117051	-1.42733	0.38651	0.0345586	-0.179811	1	0.0433211	0.57863	0.63681
feature_8044	Ano2	0.0078034	4.23444	0.38651	0.00150255	1.49575	1	0	-3.47384	0.367494
feature_12138	Tfdp2	0.0117051	-1.42733	0.38651	0.0555943	0.670432	0.459217	0.0378572	-0.21668	1
feature_15654	Ifrd1	0.078034	0.954337	0.38651	0.0240408	-0.961104	0.197921	0.0464433	0.2236	1
feature_3877	Mov10	0.039017	1.46506	0.386546	0.00901529	-0.866816	0.85551	0.016782	-0.101869	1
feature_1428	Fam107b	0.0117051	-1.43798	0.386913	0.0330561	-0.266086	1	0.0441017	0.658613	0.477539
feature_1447	Gm13199	0.0078034	4.23444	0.386913	0	0.0807164	1	0.00039028	-2.0588	0.899526
feature_4891	Eps15	0.0078034	-1.68442	0.386913	0.0375637	0.166446	1	0.0370766	0.30377	1
feature_13750	Uqcr10	0.0351153	1.54515	0.387893	0.0120204	-0.20879	1	0.0132695	-0.51448	0.957949
feature_1076	Nme7	0.0156068	-1.6868	0.389379	0.0555943	-0.0722356	1	0.0640059	0.500167	0.837801
feature_1836	Rabgap1	0.0312136	-1.26274	0.389379	0.0871478	0.175457	1	0.0827394	0.194783	1
feature_4697	Lurap1l	0.0663289	-0.849478	0.389379	0.115696	-0.0726733	1	0.128402	0.322629	0.726206
feature_9414	Atg16l2	0.0117051	-1.44855	0.389379	0.0195331	-1.10061	0.140938	0.0480045	1.3929	0.0055944
feature_3698	Golph3l	0.132658	-0.68884	0.390927	0.22989	0.145379	1	0.216215	0.0879175	1
feature_4072	Tifa	0.0195085	-1.33541	0.390927	0.0946606	1.03632	0.0119261	0.0491753	-0.593677	0.359912
feature_20981	Calm2	0.0936408	0.883947	0.390927	0.0676147	0.38511	0.85551	0.0483947	-0.637336	0.203402
feature_3296	Ndufc1	0.0273119	1.7915	0.391196	0.0180306	1.19619	0.528477	0.00624448	-1.7083	0.080725
feature_5061	Pabpc4	0.0429187	1.3518	0.393449	0.0285484	0.730219	0.757548	0.0152209	-1.10611	0.121622
feature_8570	Ceacam10	0.0429187	1.37646	0.395034	0.0315535	0.955185	0.403245	0.0140501	-1.30878	0.0310849
feature_17769	Psmb5	0.0195085	2.23444	0.401136	0.00450765	-0.0892086	1	0.00468336	-0.943323	0.92309
feature_3575	Shc1	0.0195085	2.06452	0.404429	0.00751275	0.495754	1	0.00468336	-1.23283	0.607685
feature_9272	Mesd	0.0195085	2.06452	0.404429	0.00751275	0.495754	1	0.00468336	-1.23283	0.607685
feature_10094	Tnfsf13b	0.0195085	2.06452	0.404429	0.0060102	0.154717	1	0.00507364	-0.988411	0.857281
feature_13210	Sgta	0.0195085	2.06452	0.404429	0.0060102	0.154717	1	0.00507364	-0.988411	0.857281
feature_20622	Mrpl14	0.0195085	2.06452	0.404429	0.00450765	-0.241212	1	0.00546392	-0.736872	0.979168
feature_22390	Csf2ra	0.0195085	2.06452	0.404429	0.0030051	-0.726639	1	0.0058542	-0.473838	1
feature_6583	Pptc7	0.0624272	1.15198	0.409772	0.0420714	0.54638	0.85551	0.0261488	-0.878228	0.193432
feature_12175	A4gnt	0.0273119	1.64948	0.411927	0.0180306	1.02627	0.648593	0.00741532	-1.47384	0.116485
feature_15697	Arhgap5	0.078034	-0.803691	0.411927	0.118701	-0.244814	0.93345	0.148306	0.455953	0.291701
feature_15857	Gpx2	0.0273119	1.64948	0.411927	0.0285484	2.08072	0.00301639	0.00468336	-2.52829	3.67143e-05
feature_541	Itm2c	0.0156068	2.38645	0.413212	0	-1.91928	0.738839	0.00429308	-0.210803	1
feature_2181	Slc35c1	0.0156068	2.38645	0.413212	0.0060102	0.817682	1	0.00273196	-1.64376	0.477539
feature_3637	Tchh	0.0156068	2.38645	0.413212	0.00751275	1.20625	0.85551	0.00234168	-1.98841	0.185033
feature_11580	Nlrx1	0.0156068	2.38645	0.413212	0	-1.91928	0.738839	0.00429308	-0.210803	1
feature_20176	Dusp1	0.0156068	2.38645	0.413212	0	-1.91928	0.738839	0.00429308	-0.210803	1
feature_22019	Pip5k1b	0.261414	-0.571394	0.413212	0.417709	0.159078	0.964986	0.385987	0.0428188	1
feature_19403	Lpp	0.179478	-0.625652	0.417701	0.291495	0.114399	1	0.27905	0.0970888	1
feature_22171	Pik3ap1	0.0273119	1.74259	0.417701	0.0030051	-1.4636	0.56295	0.0105376	0.0115892	1
feature_22980	Pdha1	0.0234102	1.81298	0.417701	0.0060102	-0.352243	1	0.0078056	-0.540952	1
feature_10699	D8Ertd738e	0.0156068	2.51198	0.418971	0.00450765	0.495754	1	0.00273196	-1.47384	0.664566
feature_10463	Klhl2	0.0039017	-1.88968	0.419978	0.030051	0.26358	1	0.0281002	0.256555	1
feature_5120	Zmym4	0.0156068	-1.34147	0.420827	0.0450765	-0.0203698	1	0.0499559	0.408107	0.870879
feature_17149	Hexb	0.0273119	1.7915	0.420827	0.0225382	1.6884	0.144869	0.00507364	-2.19004	0.00511087
feature_18426	Rad21	0.0039017	-2.00873	0.42114	0.0360612	0.43917	1	0.0296613	0.0925092	1
feature_2334	Knl1	0.0039017	-1.84237	0.421477	0.0420714	0.961417	0.263296	0.0238071	-0.426532	0.92309
feature_15414	Asxl2	0.0624272	-0.859245	0.421477	0.0901529	-0.410611	0.68172	0.127231	0.612523	0.113043
feature_17358	Flnb	0.0429187	-0.984724	0.421477	0.0901529	0.0514518	1	0.0924964	0.251055	0.92309
feature_19975	Rgmb	0.0585255	1.17375	0.421499	0.0360612	0.402644	1	0.0249779	-0.773398	0.394165
feature_20773	Khsrp	0.0273119	1.69529	0.422517	0.0060102	-0.684818	1	0.0101473	-0.303913	1
feature_15035	Grn	0.0195085	2.06452	0.422615	0.0105178	1.08072	0.85551	0.0039028	-1.71485	0.190041
feature_17876	Atp8a2	0.0468204	-0.93548	0.423355	0.139737	0.783556	0.0163514	0.0850811	-0.426971	0.465779
feature_6475	Dynll1	0.0351153	1.47956	0.424878	0.00450765	-1.59171	0.308144	0.0160015	0.21804	1
feature_16234	Gpr132	0.0117051	3.06452	0.424878	0	-1.08921	1	0.0019514	-0.888875	1
feature_15839	Syne2	0.0195085	-1.23316	0.427279	0.0781326	0.786269	0.129171	0.0483947	-0.366034	0.87797
feature_16351	Dip2c	0.0546238	-0.907152	0.427279	0.112691	0.138819	1	0.108108	0.15325	1
feature_18038	Zc3h13	0.0078034	-1.54692	0.427567	0.0360612	0.265141	1	0.0331738	0.19754	1
feature_4718	Dennd4c	0.0429187	-0.960312	0.428454	0.0961631	0.196194	1	0.0889839	0.117439	1
feature_11737	Wdr61	0.0195085	2.14698	0.428454	0.0060102	0.232719	1	0.00468336	-1.09533	0.874855
feature_12837	Pdss2	0.0663289	-0.87408	0.428454	0.150255	0.36824	0.702215	0.122158	-0.0618599	1
feature_17500	Arhgef3	0.0663289	-0.820838	0.428454	0.0676147	-0.930997	0.00953244	0.137769	1.01649	0.000253579
feature_21036	Mpp7	0.039017	-0.978549	0.429234	0.0961631	0.3349	0.85551	0.080788	-0.00221662	1
feature_9100	Fam189a1	0.0078034	-1.57291	0.432039	0.0360612	0.232719	1	0.0339544	0.230706	1
feature_11716	Ddx10	0.0078034	-1.57291	0.432039	0.0360612	0.232719	1	0.0339544	0.230706	1
feature_13585	Mon2	0.0312136	-1.03857	0.432262	0.0946606	0.613111	0.286216	0.0655671	-0.242883	0.966873
feature_2030	Atp5g3	0.0468204	1.2414	0.433286	0.0210357	-0.0784822	1	0.0210751	-0.447365	0.932315
feature_4763	Hook1	0.0312136	-1.04478	0.433286	0.0706198	0.065766	1	0.0722018	0.257966	0.932315
feature_10462	Msmo1	0.0468204	1.34992	0.43351	0.0180306	-0.218844	1	0.0199043	-0.417254	0.983189
feature_14866	Socs7	0.0273119	1.64948	0.43351	0.016528	0.858324	0.85551	0.0078056	-1.32945	0.190445
feature_9346	Rsf1	0.0234102	-1.16521	0.434976	0.0540918	-0.0935346	1	0.0624448	0.430814	0.751706
feature_21530	Mbd2	0.039017	-0.994374	0.435097	0.0495841	-0.809101	0.10984	0.0940575	0.985594	0.00517363
feature_3248	4932438A13Rik	0.0351153	-1.02294	0.436933	0.0706198	-0.0958724	1	0.080788	0.393712	0.700713
feature_13849	Sertad2	0.0663289	1.06452	0.439508	0.0360612	0.0663611	1	0.0323933	-0.473838	0.814359
feature_15863	Fut8	0.36676	-0.525496	0.439508	0.658117	0.436729	0.0508978	0.498388	-0.212157	0.664566
feature_1717	Ptpa	0	-2.2085	0.44002	0.0240408	0.775862	0.757264	0.0160015	-0.168983	1
feature_3719	Sf3b4	0.0117051	2.84213	0.44002	0.00150255	-0.0892086	1	0.0019514	-1.2108	0.92309
feature_3833	Trim33	0.0156068	-1.70102	0.44002	0.0631071	0.131942	1	0.0628351	0.311424	1
feature_5166	Tmem234	0.0507221	1.19005	0.44002	0.0270459	0.158719	1	0.0226362	-0.591195	0.78566
feature_6477	Srsf9	0.0117051	2.84213	0.44002	0.00150255	-0.0892086	1	0.0019514	-1.2108	0.92309
feature_6704	Asl	0.0117051	2.84213	0.44002	0	-1.24121	0.91617	0.00234168	-0.666483	1
feature_7648	Exoc6b	0.0819357	-0.794968	0.44002	0.219372	0.812783	0.00158878	0.129573	-0.486777	0.153597
feature_8164	H2afj	0.0429187	1.40155	0.44002	0.0105178	-0.850021	0.779977	0.0191237	-0.077909	1
feature_8484	Qpctl	0.0117051	2.84213	0.44002	0.00150255	-0.0892086	1	0.0019514	-1.2108	0.92309
feature_8520	Apoe	0.0195085	2.32755	0.44002	0	-2.24121	0.648593	0.00546392	-0.15191	1
feature_8588	Pafah1b3	0.0117051	2.84213	0.44002	0.00450765	1.27336	1	0.00117084	-2.28119	0.286822
feature_9022	Ldha	0.0546238	1.11343	0.44002	0.0120204	-1.28852	0.153223	0.0304419	0.306381	1
feature_10309	Tnks	0.0273119	-1.1187	0.44002	0.0495841	-0.416783	0.85551	0.0718115	0.699992	0.185033
feature_10550	Ccdc124	0.0117051	2.84213	0.44002	0.00150255	-0.0892086	1	0.0019514	-1.2108	0.92309
feature_11274	Yap1	0.0078034	-1.67245	0.44002	0.0495841	0.692446	0.550878	0.0335641	-0.200819	1
feature_12931	Vsir	0.0117051	2.84213	0.44002	0	-1.24121	0.91617	0.00234168	-0.666483	1
feature_14025	Gm12185	0.0117051	2.84213	0.44002	0	-1.24121	0.91617	0.00234168	-0.666483	1
feature_17964	Cdca2	0	-2.2085	0.44002	0.0180306	0.257594	1	0.0175626	0.349285	1
feature_18068	Vwa8	0.0624272	-0.848018	0.44002	0.103676	-0.160688	1	0.122548	0.399106	0.545973
feature_18817	A4galt	0.0117051	2.84213	0.44002	0.00150255	-0.0892086	1	0.0019514	-1.2108	0.92309
feature_22745	Kif4	0	-2.23316	0.44002	0.030051	1.18763	0.21035	0.0148306	-0.580753	0.92309
feature_22768	Pin4	0.0117051	2.84213	0.44002	0	-1.24121	0.91617	0.00234168	-0.666483	1
feature_12999	Gm31763	0	-2.25741	0.443757	0.0105178	-0.647204	0.872998	0.0202946	1.25408	0.2833
feature_12420	Stt3b	0.0117051	-1.74284	0.445562	0.0360612	-0.4751	0.93345	0.0558101	0.888732	0.312306
feature_6836	Cops6	0.0117051	3.06452	0.445666	0	-1.08921	1	0.0019514	-0.888875	1
feature_6989	Pomp	0.0195085	1.98652	0.445666	0.00450765	-0.311601	1	0.0058542	-0.643763	0.986005
feature_8017	Mlf2	0.0195085	1.98652	0.445666	0.00450765	-0.311601	1	0.0058542	-0.643763	0.986005
feature_11193	Galnt2	0.0195085	1.98652	0.445666	0.00450765	-0.311601	1	0.0058542	-0.643763	0.986005
feature_13578	Rxylt1	0.0195085	1.98652	0.445666	0.0060102	0.0807164	1	0.00546392	-0.888875	0.890853
feature_21229	Cd14	0.0195085	1.98652	0.445666	0.0120204	1.25064	0.651814	0.0039028	-1.82176	0.126502
feature_9943	Sigirr	0.0195085	2.06452	0.44567	0.0120204	1.34375	0.635864	0.00351252	-1.95926	0.0892422
feature_15674	Pnpla8	0.0039017	-1.87408	0.446689	0.0345586	0.536396	0.85551	0.0265391	-0.00916938	1
feature_11986	Myo5a	0.0273119	1.69529	0.446819	0.00450765	-1.04857	0.85551	0.0105376	-0.125914	1
feature_16551	Mboat1	0.0429187	-0.970127	0.446819	0.07663	-0.213197	1	0.0948381	0.47962	0.47426
feature_18606	Plec	0.0429187	1.25716	0.446819	0.0150255	-0.459852	1	0.0202946	-0.205349	1
feature_7127	Fam3c	0.0234102	1.7564	0.447007	0.0060102	-0.40471	1	0.00819588	-0.473838	1
feature_8090	Clec2g	0	-2.28126	0.447007	0.0360612	1.51512	0.0211565	0.0140501	-0.90824	0.442756
feature_9588	Rps13	0	-2.28126	0.447007	0.0195331	0.303109	1	0.0183432	0.30377	1
feature_17364	Pdhb	0.0234102	1.7564	0.447007	0.0120204	0.665679	1	0.00663476	-1.2108	0.409371
feature_19032	Slc11a2	0.0234102	1.7564	0.447007	0.0105178	0.43686	1	0.00702504	-1.03327	0.63681
feature_20885	Gm26749	0.0039017	-1.74284	0.447007	0.0150255	-0.688671	0.85551	0.0284905	1.15065	0.170719
feature_1802	Hspa5	0.0663289	0.973917	0.450551	0.0450765	0.362487	1	0.0327835	-0.649409	0.384497
feature_4141	Gm31243	0.0039017	-1.77678	0.453689	0	-4.36223	1.73079e-05	0.0331738	3.95243	1.89609e-07
feature_8209	C2cd5	0.0117051	-1.38394	0.456324	0.0405688	0.146604	1	0.0401989	0.272406	1
feature_20832	L3mbtl4	0	-2.30471	0.457665	0.0105178	-0.700643	0.85551	0.0210751	1.30752	0.189605
feature_21608	Zfp407	0.0702306	-0.796077	0.459526	0.108184	-0.221312	1	0.133086	0.43622	0.394165
feature_4988	Atp6v0b	0.105346	0.791501	0.4614	0.0240408	-1.57329	0.000425076	0.0725921	0.613625	0.314704
feature_4381	Pnisr	0.0507221	-0.891891	0.461659	0.105178	0.159001	1	0.0995214	0.133845	1
feature_834	Lax1	0.0156068	2.38645	0.461848	0	-1.91928	0.768023	0.00429308	-0.210803	1
feature_10660	Il15	0.0078034	-1.71975	0.461848	0.0225382	-0.7137	0.758682	0.0421503	1.12442	0.14727
feature_11155	Ankrd11	0.120953	-0.68814	0.461848	0.190824	-0.0251922	1	0.202555	0.235647	0.879774
feature_12251	Tex264	0.0156068	2.38645	0.461848	0.0030051	-0.141676	1	0.00351252	-0.959264	0.92309
feature_21224	Eif4ebp3	0.0234102	1.87187	0.462118	0.00751275	0.0218227	1	0.00702504	-0.810873	0.92309
feature_11496	Stt3a	0.0039017	-1.80995	0.464465	0.0390663	0.858324	0.40943	0.0238071	-0.326996	1
feature_20921	Sos1	0.0039017	-1.80995	0.464465	0.0330561	0.538189	0.85551	0.0253682	-0.014406	1
feature_3484	Lrba	0.124854	-0.668068	0.464731	0.24191	0.373442	0.434137	0.193579	-0.116648	1
feature_12893	Man1a	0.0351153	-1.17325	0.464731	0.0676147	-0.344089	0.964369	0.0924964	0.63962	0.334004
feature_2011	Gm11084	0.0156068	2.27097	0.466622	0.0030051	-0.241212	1	0.0039028	-0.821761	1
feature_2707	Pdrg1	0.0156068	2.27097	0.466622	0.00150255	-0.919284	1	0.00429308	-0.473838	1
feature_7988	Pex5	0.0156068	2.38645	0.466622	0.00150255	-0.826174	1	0.0039028	-0.599369	1
feature_20449	Neu1	0.0468204	1.44303	0.466622	0.0120204	-0.749359	0.93345	0.0199043	-0.165715	1
feature_8915	Myh14	0.113149	0.755473	0.466821	0.0420714	-0.868658	0.107058	0.0757143	0.275512	0.92309
feature_4046	4930447N08Rik	0.0039017	-1.82625	0.471625	0.0225382	-0.148102	1	0.0284905	0.648153	0.686046
feature_16189	Tecpr2	0.0039017	-1.82625	0.471625	0.0345586	0.59959	0.816431	0.0253682	-0.0732997	1
feature_964	Lamc2	0.0273119	1.56202	0.473041	0.00751275	-0.504246	1	0.0109278	-0.316296	1
feature_1840	Dennd1a	0.039017	-0.999611	0.473041	0.0751275	-0.129501	1	0.087813	0.415604	0.666798
feature_20015	Zfp983	0.0273119	1.56202	0.473041	0.0060102	-0.806809	0.85551	0.0113181	-0.15191	1
feature_4712	Sh3gl2	0.0429187	-0.930462	0.473852	0.0886504	0.0867401	1	0.0885936	0.209305	0.983189
feature_5792	Lmbr1	0.0156068	-1.25741	0.473852	0.046579	0.138202	1	0.0460531	0.251055	1
feature_21634	Ppp6r3	0.0429187	-0.994374	0.473852	0.105178	0.317574	0.85551	0.0893742	0.0141004	1
feature_4588	Slc44a1	0.0936408	-0.71509	0.476063	0.093158	-0.839849	0.00858832	0.176407	0.906586	0.000309426
feature_20492	H2-Q7	0.0234102	1.87187	0.476391	0.00450765	-0.674171	1	0.0078056	-0.403448	1
feature_9834	Plekha1	0.0078034	-1.71975	0.476753	0.0135229	-1.46772	0.0897443	0.0444919	1.78669	0.00377668
feature_9439	Nup98	0.0156068	-1.27652	0.479819	0.0570969	0.483476	0.835741	0.0441017	-0.0672124	1
feature_13634	Myo1a	0.039017	1.35403	0.479819	0.0195331	0.215646	1	0.0156112	-0.701248	0.720985
feature_2189	Trp53i11	0.0312136	1.42709	0.481578	0.030051	1.56614	0.0343989	0.00819588	-1.87239	0.00146387
feature_11119	Map1lc3b	0.0312136	1.42709	0.481578	0.0060102	-1.12092	0.67994	0.0144404	0.0736502	1
feature_20730	Stap2	0.0312136	1.42709	0.481578	0.0120204	-0.141676	1	0.0128792	-0.473838	0.983189
feature_253	Myo1b	0.0234102	-1.09775	0.482221	0.0676147	0.38511	0.85551	0.0554198	-0.014406	1
feature_1636	Rpl7a	0.0273119	1.64948	0.482221	0.0120204	0.296445	1	0.00897644	-0.888875	0.782886
feature_2231	Caprin1	0.0351153	-0.994374	0.482221	0.0976657	0.525198	0.465769	0.0718115	-0.171275	1
feature_2415	Duoxa2	0.039017	1.32755	0.482221	0.0060102	-1.52809	0.207147	0.019514	0.291697	1
feature_2750	Ncoa6	0.0234102	-1.12059	0.482221	0.0555943	0.00671578	1	0.0597129	0.333517	0.92309
feature_2971	Fam210b	0.0078034	3.64948	0.482221	0	-0.241212	1	0.00078056	-1.47384	0.932315
feature_3228	Gm38509	0.0078034	3.64948	0.482221	0.00150255	1.08072	1	0.00039028	-2.47384	0.619001
feature_3307	Foxo1	0.0156068	-1.28598	0.482221	0.0450765	0.046228	1	0.0476142	0.339394	0.92309
feature_3361	P2ry12	0.0078034	3.64948	0.482221	0	-0.241212	1	0.00078056	-1.47384	0.932315
feature_3585	Il6ra	0.0195085	1.91252	0.482221	0.00150255	-1.50425	0.678229	0.00702504	-0.0332651	1
feature_3587	Atp8b2	0.0078034	3.64948	0.482221	0	-0.241212	1	0.00078056	-1.47384	0.932315
feature_3599	Creb3l4	0.0195085	1.91252	0.482221	0.0105178	0.910791	0.888118	0.00468336	-1.47384	0.333603
feature_3974	Prpf38b	0.0156068	-1.28598	0.482221	0.0480816	0.159326	1	0.0468336	0.235572	1
feature_4465	Dctn3	0.0195085	1.91252	0.482221	0.0060102	0.010327	1	0.0058542	-0.795766	0.92309
feature_5182	Tinagl1	0.0195085	1.91252	0.482221	0.00450765	-0.378715	1	0.00624448	-0.5563	1
feature_5533	Tnfrsf25	0.0078034	3.64948	0.482221	0	-0.241212	1	0.00078056	-1.47384	0.932315
feature_5667	Adam22	0.0078034	3.64948	0.482221	0	-0.241212	1	0.00078056	-1.47384	0.932315
feature_6107	Dcun1d4	0.0195085	1.91252	0.482221	0.00901529	0.640144	1	0.00507364	-1.25145	0.515369
feature_6508	Taok3	0.202888	0.579741	0.482221	0.112691	-0.392455	0.623553	0.144013	0.0575438	1
feature_6559	Hectd4	0.0195085	-1.18341	0.482221	0.0525892	0.11109	1	0.0526878	0.256073	0.979621
feature_7340	Gimap1	0.0078034	3.64948	0.482221	0	-0.241212	1	0.00078056	-1.47384	0.932315
feature_7397	Hibadh	0.0156068	-1.28598	0.482221	0.0585994	0.520001	0.73178	0.0441017	-0.100379	1
feature_7482	Il23r	0.0078034	3.64948	0.482221	0	-0.241212	1	0.00078056	-1.47384	0.932315
feature_10230	5830408C22Rik	0.0078034	3.64948	0.482221	0	-0.241212	1	0.00078056	-1.47384	0.932315
feature_10511	Mef2b	0.0078034	3.64948	0.482221	0.00150255	1.08072	1	0.00039028	-2.47384	0.619001
feature_10810	Mt2	0.0078034	3.64948	0.482221	0	-0.241212	1	0.00078056	-1.47384	0.932315
feature_11013	Sf3b3	0.0663289	1.06452	0.482221	0.0345586	-0.00674648	1	0.0327835	-0.421999	0.92309
feature_12933	Slc29a3	0.0078034	3.64948	0.482221	0.00150255	1.08072	1	0.00039028	-2.47384	0.619001
feature_14119	P4ha2	0.0078034	3.64948	0.482221	0.00150255	1.08072	1	0.00039028	-2.47384	0.619001
feature_15101	Limd2	0.0078034	3.64948	0.482221	0	-0.241212	1	0.00078056	-1.47384	0.932315
feature_15769	Gm9887	0.0078034	3.64948	0.482221	0	-0.241212	1	0.00078056	-1.47384	0.932315
feature_15997	Erg28	0.0195085	1.91252	0.482221	0.0060102	0.010327	1	0.0058542	-0.795766	0.92309
feature_16064	Kcnk13	0.0078034	3.64948	0.482221	0	-0.241212	1	0.00078056	-1.47384	0.932315
feature_16583	Tubb2a	0.0078034	3.64948	0.482221	0	-0.241212	1	0.00078056	-1.47384	0.932315
feature_17333	Gm3252	0.0078034	3.64948	0.482221	0	-0.241212	1	0.00078056	-1.47384	0.932315
feature_17483	Anxa11	0.0195085	-1.18341	0.482221	0.0616045	0.396218	0.85551	0.0503461	-0.00605868	1
feature_18364	Grhl2	0.0312136	-1.02608	0.482221	0.0841427	0.405812	0.790277	0.0675185	-0.053262	1
feature_18803	Cyp2d34	0.0546238	1.04858	0.482221	0.0315535	0.147831	1	0.0269293	-0.51448	0.779568
feature_18857	Gramd4	0.0351153	1.41682	0.482221	0.016528	0.173826	1	0.0136598	-0.69623	0.793367
feature_19598	Gcsam	0.0078034	3.64948	0.482221	0	-0.241212	1	0.00078056	-1.47384	0.932315
feature_19706	Mir99ahg	0	-2.80995	0.482221	0.0150255	-0.745254	0.931491	0.0300516	1.35213	0.318464
feature_19750	Sod1	0.0195085	1.91252	0.482221	0.00751275	0.343751	1	0.00546392	-1.02638	0.767369
feature_20180	Crebrf	0.0156068	-1.29538	0.482221	0.0315535	-0.557884	0.766963	0.051517	0.881005	0.135943
feature_22043	Glis3	0.0312136	-1.00077	0.482221	0.0721224	0.156267	1	0.0690796	0.169006	1
feature_22954	Shroom2	0.0156068	-1.31399	0.482221	0.0691173	0.802415	0.224112	0.0425405	-0.364903	0.92309
feature_23042	Gm21887	0.0078034	3.64948	0.482221	0	-0.241212	1	0.00078056	-1.47384	0.932315
feature_12618	Phactr2	0.0741323	-0.776783	0.485106	0.160773	0.417751	0.470497	0.12567	-0.127132	1
feature_15086	Tlk2	0.0156068	-1.43798	0.48516	0.0525892	0.1317	1	0.0522975	0.28105	1
feature_20318	Ndufv3	0.0273119	1.64948	0.48516	0.0105178	0.0807164	1	0.00936672	-0.736872	0.893417
feature_751	Mgat5	0.202888	-0.594141	0.486211	0.324551	0.128022	1	0.30715	0.0767518	1
feature_13001	Jmjd1c	0.0858374	-0.724801	0.486211	0.133727	-0.106911	1	0.151038	0.31872	0.673523
feature_567	Gigyf2	0.0312136	-1.11723	0.488643	0.0706198	-0.0208217	1	0.0768852	0.348164	0.92309
feature_825	Plekha6	0.15997	-0.63592	0.491992	0.31854	0.475576	0.126504	0.23651	-0.21697	0.855561
feature_1821	Dab2ip	0.0429187	1.19005	0.491992	0.0315535	0.732793	0.73178	0.0171723	-1.02638	0.158892
feature_12185	Ppp2r3a	0.0195085	-1.3278	0.492455	0.0345586	-0.752174	0.488603	0.0643962	1.04322	0.0666257
feature_7021	Fry	0.0858374	-0.736849	0.492896	0.220875	0.814436	0.000900695	0.129963	-0.499524	0.115511
feature_14113	Irf1	0.0624272	0.982057	0.492896	0.0255433	-0.490826	0.85551	0.0351252	-0.0535058	1
feature_22657	Naa10	0.0156068	2.38645	0.493489	0.00751275	1.20625	0.900809	0.00234168	-1.98841	0.245891
feature_3175	Pld1	0.144363	-0.62026	0.493593	0.270459	0.375991	0.374648	0.215435	-0.130886	1
feature_3545	Ash1l	0.0975425	-0.699927	0.493593	0.154763	-0.0390229	1	0.166259	0.253027	0.86585
feature_18502	Gsdmc2	0.0078034	-1.466	0.493593	0.0285484	-0.040299	1	0.0327835	0.476122	0.890853
feature_876	Pkp1	0.0117051	2.84213	0.494081	0	-1.24121	1	0.00234168	-0.666483	1
feature_3613	S100a13	0.0273119	1.5202	0.494081	0.00901529	-0.281854	1	0.0109278	-0.423212	1
feature_9544	Sbf2	0.0507221	-0.856046	0.494081	0.0961631	0.0423882	1	0.0987409	0.229445	0.925722
feature_10821	Cpne2	0.039017	1.30156	0.494081	0.0225382	0.408291	1	0.0156112	-0.816725	0.513775
feature_13071	Pcnt	0.039017	1.30156	0.494081	0.0195331	0.160151	1	0.0163918	-0.632535	0.8025
feature_18073	Naa16	0.0078034	-1.4798	0.494081	0.0435739	0.702205	0.532731	0.029271	-0.22591	1
feature_19787	Mrps6	0.0273119	1.5202	0.494081	0.00901529	-0.281854	1	0.0109278	-0.423212	1
feature_9693	Xpo6	0.0039017	-1.90511	0.501753	0.0195331	-0.469481	1	0.0312224	0.959122	0.370231
feature_19783	Itsn1	0.0078034	-1.50702	0.501753	0.060102	1.32974	0.00357883	0.0257585	-0.834013	0.184738
feature_12322	Qars	0.0156068	2.38645	0.504821	0.00150255	-0.826174	1	0.0039028	-0.599369	1
feature_10390	Stox2	0.0819357	-0.742835	0.505809	0.130722	-0.0892086	1	0.145965	0.308725	0.701108
feature_17873	Cab39l	0.0117051	-1.59845	0.505809	0.0420714	-0.0499873	1	0.0480045	0.480359	0.890853
feature_21190	Ctnna1	0.0936408	-0.703841	0.507468	0.132224	-0.247681	0.91617	0.164698	0.430497	0.315265
feature_9696	Lat	0.0078034	3.64948	0.510544	0	-0.241212	1	0.00078056	-1.47384	0.935399
feature_4297	Rps20	0.0624272	1.06452	0.511167	0.0540918	0.932618	0.197921	0.0253682	-1.15736	0.013726
feature_22128	Kif11	0.0039017	-1.82625	0.512054	0.0345586	0.59959	0.85551	0.0253682	-0.0732997	1
feature_1626	0610009E02Rik	0.0156068	2.16406	0.513573	0.00150255	-1.00675	0.91617	0.00468336	-0.35836	1
feature_3271	Plk4	0.0156068	2.16406	0.513573	0.00450765	0.173826	1	0.0039028	-1.01441	0.892817
feature_3573	Flad1	0.0156068	2.16406	0.513573	0.0030051	-0.334321	1	0.00429308	-0.69623	1
feature_5015	Svbp	0.0156068	2.16406	0.513573	0.00150255	-1.00675	0.91617	0.00468336	-0.35836	1
feature_5163	Lck	0.0078034	3.64948	0.513573	0	-0.241212	1	0.00078056	-1.47384	0.935399
feature_6798	Ufsp1	0.0078034	3.64948	0.513573	0	-0.241212	1	0.00078056	-1.47384	0.935399
feature_8429	Dhx34	0.0117051	2.64948	0.513573	0	-1.37872	0.91617	0.00273196	-0.473838	1
feature_8573	Rps19	0.0351153	1.47956	0.513573	0.0210357	0.665679	0.921129	0.0117084	-1.1046	0.367494
feature_10603	Slc35e1	0.0156068	2.16406	0.513573	0.0030051	-0.334321	1	0.00429308	-0.69623	1
feature_11145	Aprt	0.0156068	2.16406	0.513573	0.0030051	-0.334321	1	0.00429308	-0.69623	1
feature_11375	Qtrt1	0.0156068	2.16406	0.513573	0.0060102	0.59529	1	0.00351252	-1.32183	0.726145
feature_12327	Dalrd3	0.039017	1.27602	0.513573	0.0225382	0.380277	1	0.0160015	-0.78196	0.612644
feature_13166	1600002K03Rik	0.0117051	2.64948	0.513573	0.0030051	0.495754	1	0.0019514	-1.47384	0.838969
feature_14342	Borcs6	0.0117051	2.64948	0.513573	0.00150255	-0.241212	1	0.00234168	-0.988411	0.957949
feature_14894	Cdk12	0.0468204	-0.888483	0.513573	0.0901529	0.022769	1	0.0940575	0.255201	0.92309
feature_16819	B230219D22Rik	0.0429187	1.28025	0.513573	0.0060102	-1.70588	0.135843	0.022246	0.384143	1
feature_17266	Il31ra	0.0117051	2.64948	0.513573	0.00450765	1.08072	1	0.00156112	-1.95926	0.411229
feature_18800	Cyp2d10	0.0117051	2.64948	0.513573	0.0030051	0.495754	1	0.0019514	-1.47384	0.838969
feature_19744	Cldn8	0.0117051	2.64948	0.513573	0.00450765	1.08072	1	0.00156112	-1.95926	0.411229
feature_19899	Tagap	0.0078034	3.64948	0.513573	0	-0.241212	1	0.00078056	-1.47384	0.935399
feature_21769	Mrpl49	0.0117051	2.64948	0.513573	0.00450765	1.08072	1	0.00156112	-1.95926	0.411229
feature_22417	Pim2	0.0117051	2.64948	0.513573	0.00150255	-0.241212	1	0.00234168	-0.988411	0.957949
feature_5465	Mad2l2	0.0078034	3.64948	0.514389	0	-0.241212	1	0.00078056	-1.47384	0.935399
feature_1557	Ehmt1	0.0429187	-0.899982	0.514575	0.093158	0.212506	1	0.0850811	0.091496	1
feature_3614	S100a14	0.0234102	1.64948	0.514575	0.00901529	0.0807164	1	0.00819588	-0.714846	0.92309
feature_4755	Jun	0.0585255	1.04957	0.514575	0.00901529	-1.83985	0.0099505	0.0351252	0.574525	0.730977
feature_15702	Egln3	0.0234102	1.64948	0.514575	0.00751275	-0.192302	1	0.00858616	-0.535238	1
feature_20052	Srrm2	0.113149	-0.653081	0.514578	0.184814	0.0749107	1	0.182651	0.142219	1
feature_14799	Pdk2	0.0156068	2.16406	0.514961	0.00450765	0.173826	1	0.0039028	-1.01441	0.895478
feature_19074	Krt18	0.0507221	1.13491	0.514961	0.0210357	-0.316174	1	0.0253682	-0.236798	1
feature_9882	Mki67	0.0039017	-2.03702	0.517379	0.0240408	-0.291252	1	0.0335641	0.799181	0.672194
feature_22141	Plce1	0.0546238	-0.963264	0.520386	0.151757	0.623859	0.227884	0.103424	-0.276536	0.92309
feature_7463	Smarcad1	0.0117051	-1.3163	0.523415	0.0495841	0.598324	0.658609	0.0355155	-0.159729	1
feature_13850	Aftph	0.039017	-0.918992	0.523415	0.0706198	-0.141676	1	0.0831297	0.409648	0.676074
feature_8961	Snrnp70	0.249709	0.552909	0.525697	0.238905	0.554022	0.0827523	0.154551	-0.648197	0.00570862
feature_20680	Foxp4	0.0663289	0.999228	0.525697	0.0450765	0.391056	0.991185	0.032003	-0.683761	0.412564
feature_7228	Cnot4	0.0468204	-0.949286	0.526647	0.0856453	-0.138118	1	0.100302	0.408107	0.672194
feature_34	Cspp1	0.0351153	-0.93548	0.527217	0.060102	-0.269091	1	0.0776657	0.526162	0.439983
feature_3079	Helz2	0.0273119	1.47956	0.527217	0.0060102	-0.882758	0.85551	0.0120987	-0.0588001	1
feature_3276	Larp1b	0.0351153	-0.93548	0.527217	0.0736249	0.0807164	1	0.0741532	0.220948	0.993436
feature_4048	Fabp2	0.0117051	-1.72556	0.527217	0	-5.32016	8.2909e-08	0.0643962	3.9012	9.41213e-09
feature_4555	Tbc1d2	0.0195085	1.84213	0.527217	0.0060102	-0.0567872	1	0.00624448	-0.708303	0.925591
feature_4774	Tm2d1	0.0312136	1.35998	0.527217	0.00450765	-1.53399	0.302097	0.0156112	0.298752	1
feature_8037	Scnn1a	0.0312136	1.35998	0.527217	0.0105178	-0.411137	1	0.0140501	-0.264384	1
feature_8684	Ech1	0.0195085	1.84213	0.527217	0.00450765	-0.442846	1	0.00663476	-0.473838	1
feature_10736	Man2b1	0.0273119	1.47956	0.527217	0.016528	0.665679	0.937322	0.00936672	-1.07791	0.390928
feature_10920	Zdhhc1	0.0195085	1.84213	0.527217	0.00150255	-1.56314	0.68172	0.00741532	0.0407355	1
feature_15213	Atp5h	0.0351153	1.51198	0.527217	0.0060102	-1.21207	0.767997	0.0152209	0.0407355	1
feature_18768	Rbx1	0.0312136	1.35998	0.527217	0.00901529	-0.635491	0.91617	0.0144404	-0.132801	1
feature_6290	Arhgap24	0.0312136	-1.00714	0.530264	0.0390663	-0.871755	0.144869	0.078056	1.04793	0.0121937
feature_13225	Tjp3	0.0585255	1.02013	0.530264	0.0360612	0.232719	1	0.0288807	-0.566947	0.63681
feature_7879	Gm44079	0	-2.07844	0.530301	0.00901529	-0.666518	0.91617	0.0179529	1.2734	0.286822
feature_10939	Edc4	0	-2.07844	0.530301	0.0180306	0.423604	1	0.0156112	0.183275	1
feature_13296	Cry1	0	-2.07844	0.530301	0.0060102	-1.21207	0.494373	0.0187334	1.81894	0.0810275
feature_14299	Arhgap44	0	-2.07844	0.530301	0.0375637	1.9738	0.000725078	0.0105376	-1.36692	0.0569469
feature_15929	Pcnx	0.0117051	-1.35052	0.530301	0.0315535	-0.241212	1	0.0413697	0.623773	0.619001
feature_20879	Spast	0.0039017	-1.6543	0.531404	0.0270459	0.374448	1	0.0234168	0.134972	1
feature_8443	Ap2s1	0.0156068	2.27097	0.531641	0.0060102	0.702205	1	0.00312224	-1.47384	0.619001
feature_1855	Ppp6c	0.0039017	-1.67245	0.532329	0.016528	-0.463604	0.982223	0.0265391	0.934247	0.411229
feature_1866	Acvr2a	0.0195085	-1.2085	0.532329	0.0435739	-0.241212	1	0.0562003	0.576788	0.545973
feature_2351	Oip5os1	0.0585255	1.00563	0.532329	0.0255433	-0.364068	1	0.032003	-0.143192	1
feature_2353	Nusap1	0	-2.13188	0.532329	0.0240408	0.882777	0.629395	0.0148306	-0.275898	1
feature_2390	Trp53bp1	0.0039017	-1.69037	0.532329	0.0255433	0.228274	1	0.0245876	0.278235	1
feature_2437	Cep152	0	-2.13188	0.532329	0.0195331	0.495754	1	0.0160015	0.111125	1
feature_3152	Gm16093	0	-2.10541	0.532329	0.00901529	-0.696891	0.917124	0.0183432	1.30377	0.286822
feature_4789	Itgb3bp	0.0039017	-1.67245	0.532329	0.0315535	0.633257	0.85551	0.0226362	-0.114757	1
feature_5311	Hnrnpr	0.0273119	-1.00157	0.532329	0.0676147	0.25555	1	0.0604934	0.0836441	1
feature_6276	Coq2	0	-2.13188	0.532329	0.0120204	-0.303947	1	0.0179529	0.910826	0.63681
feature_6778	Cux1	0.0546238	-0.823006	0.532329	0.103676	0.0910583	1	0.102644	0.178239	1
feature_7359	Gsdme	0.0312136	-0.981493	0.532329	0.0480816	-0.511514	0.690049	0.0741532	0.746039	0.140377
feature_7669	Tgfa	0	-2.13188	0.532329	0.0150255	0.0482949	1	0.0171723	0.558584	0.92309
feature_7688	Anxa4	0.0312136	-0.975009	0.532329	0.0435739	-0.663445	0.381452	0.0749338	0.870692	0.0450429
feature_8796	Uba2	0.0039017	-1.67245	0.532329	0.0315535	0.633257	0.85551	0.0226362	-0.114757	1
feature_12115	Plscr2	0.0117051	2.84213	0.532329	0.00150255	-0.0892086	1	0.0019514	-1.2108	0.935399
feature_12752	Tpd52l1	0	-2.10541	0.532329	0.016528	0.239414	1	0.0163918	0.367465	1
feature_14090	Ppp2ca	0.0273119	-1.00157	0.532329	0.0570969	-0.0432724	1	0.0632254	0.351329	0.890853
feature_14290	Pmp22	0.0702306	1.40556	0.532329	0.0060102	-2.2978	0.106139	0.0331738	0.428865	1
feature_14479	Shpk	0.0117051	2.64948	0.532329	0.0060102	1.59529	0.782266	0.00117084	-2.47384	0.179408
feature_14893	Med1	0.0039017	-1.69037	0.532329	0.0270459	0.328644	1	0.0241974	0.181514	1
feature_14936	Krt20	0.144363	0.687956	0.532329	0.0150255	-2.79524	2.21166e-11	0.11123	1.10107	0.00131091
feature_15615	Atxn7l1os1	0	-2.13188	0.532329	0.0120204	-0.303947	1	0.0179529	0.910826	0.63681
feature_15640	Agmo	0.0039017	-1.97987	0.532329	0.0375637	0.552337	0.900809	0.0284905	-0.0192718	1
feature_16326	Akr1c19	0.0156068	-1.21841	0.532329	0.0180306	-1.32737	0.0339435	0.0519073	1.50479	0.00146387
feature_16524	Ripor2	0	-2.13188	0.532329	0.00150255	-2.67417	0.0212681	0.0206848	3.28105	0.000505058
feature_4372	Wwp1	0.0195085	-1.11428	0.533905	0.0480816	0.0376476	1	0.0507364	0.311658	0.92309
feature_19419	Fgf12	0	-2.72556	0.534927	0.0120204	-0.978177	0.85551	0.0288807	1.58506	0.195227
feature_7358	Mpp6	0.0156068	-1.22826	0.535014	0.0435739	0.0568696	1	0.0456628	0.321343	0.92309
feature_8267	Resf1	0.0234102	-1.05886	0.535014	0.0450765	-0.27797	1	0.0593226	0.574097	0.498492
feature_15256	Ubald2	0.039017	1.22627	0.535014	0.00901529	-1.08921	0.488603	0.0202946	0.16662	1
feature_15770	Arf6	0.0273119	1.74259	0.535014	0.0030051	-1.4636	0.768023	0.0105376	0.0115892	1
feature_21661	Cdk2ap2	0.0234102	1.64948	0.535014	0.0060102	-0.504246	1	0.00897644	-0.348307	1
feature_21864	Ganab	0.0039017	-1.70807	0.535014	0.030051	0.495754	0.91617	0.0238071	0.020927	1
feature_12879	Dcbld1	0.0195085	-1.13188	0.536234	0.0585994	0.369221	0.926682	0.048785	0.0115892	1
feature_16649	Slc35b3	0.0234102	-1.06672	0.536234	0.0525892	-0.025483	1	0.0577615	0.353013	0.92309
feature_17531	Spcs1	0.0234102	1.70195	0.537382	0.016528	1.20625	0.585864	0.0058542	-1.64376	0.132992
feature_2291	4930533B01Rik	0	-2.15787	0.538576	0.0150255	0.016586	1	0.0175626	0.590293	0.92309
feature_8021	4930557K07Rik	0	-2.15787	0.538576	0.00450765	-1.6472	0.198207	0.0202946	2.25408	0.0121213
feature_16193	4930595D18Rik	0	-2.15787	0.538576	0.0135229	-0.151944	1	0.0179529	0.758823	0.741223
feature_22333	Gm31356	0.0078034	3.64948	0.538576	0	-0.241212	1	0.00078056	-1.47384	0.936241
feature_1173	Itln1	0.0195085	1.91252	0.539643	0.0060102	0.010327	1	0.0058542	-0.795766	0.932315
feature_1541	Pdss1	0.0156068	-1.37732	0.539643	0.0751275	0.882777	0.183221	0.0437114	-0.435018	0.86707
feature_2165	Arhgap1	0.039017	1.38099	0.539643	0.0195331	0.244215	1	0.0152209	-0.736872	0.698445
feature_3151	Pde7a	0.0273119	-1.15787	0.539643	0.0691173	0.103924	1	0.0690796	0.247008	1
feature_4881	Zfyve9	0.0078034	-1.68442	0.539643	0.0255433	-0.477279	1	0.0401989	0.904674	0.340231
feature_9590	Pik3c2a	0.105346	0.756397	0.539643	0.0450765	-0.644567	0.400515	0.0690796	0.143915	1
feature_11447	Zbtb44	0.0039017	-1.72556	0.539643	0.0285484	0.380277	1	0.0245876	0.133845	1
feature_7447	Abcg2	0.0663289	0.999228	0.539954	0.0120204	-1.6801	0.0271105	0.0405891	0.539968	0.782598
feature_9631	Anks4b	0.0312136	1.534	0.541511	0.0105178	-0.241212	1	0.0120987	-0.473838	1
feature_1455	Usp6nl	0.0234102	-1.09006	0.5424	0.0706198	0.475854	0.73178	0.0542489	-0.0994421	1
feature_3598	Jtb	0.0234102	1.59886	0.5424	0.00450765	-0.919284	0.862446	0.009757	-0.095326	1
feature_11924	Tln2	0.0078034	-1.63592	0.5424	0.0450765	0.559179	0.85551	0.0335641	-0.0752883	1
feature_16801	Prelid1	0.0234102	1.59886	0.5424	0.0060102	-0.551552	1	0.00936672	-0.289413	1
feature_18894	Chkb	0.0234102	1.59886	0.5424	0.0225382	1.75879	0.0502716	0.00507364	-2.12591	0.00288423
feature_20469	Csnk2b	0.0117051	2.64948	0.5424	0.00150255	-0.241212	1	0.00234168	-0.988411	0.969967
feature_21492	Gm9926	0.0234102	1.59886	0.5424	0.0030051	-1.37872	0.577219	0.0101473	0.111125	1
feature_14712	Rps6kb1	0.0195085	-1.15787	0.544094	0.0661122	0.561342	0.552499	0.0480045	-0.163498	1
feature_2101	Zdhhc5	0	-2.18341	0.546071	0.0195331	0.42864	1	0.016782	0.178239	1
feature_4761	Fggy	0	-2.18341	0.546071	0.0180306	0.289303	1	0.0171723	0.317576	1
feature_17535	Smim4	0	-2.18341	0.546071	0.0120204	-0.364068	1	0.0187334	0.970947	0.590241
feature_799	Slc41a1	0.0117051	2.64948	0.54707	0	-1.37872	0.933597	0.00273196	-0.473838	1
feature_1798	Pbx3	0.0351153	-0.976957	0.54707	0.0661122	-0.155351	1	0.0788366	0.436611	0.700713
feature_15555	Id2	0.0156068	2.38645	0.54707	0	-1.91928	0.85551	0.00429308	-0.210803	1
feature_15930	Sipa1l1	0.0897391	-0.696293	0.54707	0.198336	0.569945	0.0835424	0.138549	-0.283506	0.718748
feature_22337	Vti1a	0.132658	-0.609252	0.54707	0.265951	0.514791	0.0824962	0.192018	-0.256314	0.704636
feature_13746	Mtmr3	0.0468204	-0.849751	0.547547	0.121706	0.624487	0.162974	0.0827394	-0.293717	0.890853
feature_11919	Rps27l	0.0195085	1.91252	0.548338	0.00751275	0.343751	1	0.00546392	-1.02638	0.801632
feature_19822	Vps26c	0.0195085	1.91252	0.549281	0.0030051	-0.857883	1	0.00663476	-0.303913	1
feature_6104	Ociad1	0.039017	1.20202	0.549509	0.0270459	0.628204	0.85551	0.0160015	-0.939501	0.314474
feature_8406	Ube2m	0.0234102	1.70195	0.549509	0.00901529	0.133184	1	0.0078056	-0.78196	0.92309
feature_9972	Ap2a2	0.0468204	1.1601	0.549509	0.016528	-0.543775	0.97376	0.0238071	-0.104604	1
feature_10560	Nr2f6	0.0195085	1.91252	0.549509	0.00901529	0.640144	1	0.00507364	-1.25145	0.588108
feature_11659	Cadm1	0.0117051	2.64948	0.549509	0	-1.37872	0.936797	0.00273196	-0.473838	1
feature_13515	Cct2	0.0273119	1.56202	0.549509	0.0105178	-0.00674648	1	0.0101473	-0.625841	0.92309
feature_15380	Gps1	0.0117051	2.64948	0.549509	0.00450765	1.08072	1	0.00156112	-1.95926	0.455814
feature_22454	Atp6ap2	0.0507221	1.03057	0.549633	0.0390663	0.645779	0.724633	0.0230265	-0.888875	0.170719
feature_1851	Rpl35	0.0234102	1.70195	0.550051	0.016528	1.20625	0.60297	0.0058542	-1.64376	0.144143
feature_9880	Ptpre	0.0468204	1.14047	0.554379	0.0195331	-0.301753	1	0.0234168	-0.24354	1
feature_13466	Nav3	0.0078034	3.64948	0.554379	0	-0.241212	1	0.00078056	-1.47384	0.939384
feature_10774	Tox3	0.0741323	-0.72903	0.555989	0.117199	-0.0952832	1	0.131524	0.312332	0.745876
feature_452	Cnppd1	0.0195085	1.77501	0.558708	0.0060102	-0.120918	1	0.00663476	-0.625841	1
feature_950	Edem3	0.0273119	-1.05788	0.558708	0.0796351	0.486876	0.728405	0.0604934	-0.119173	1
feature_2111	Ssrp1	0.0156068	2.06452	0.558708	0.00150255	-1.08921	0.921708	0.00507364	-0.251445	1
feature_3127	Slc10a5	0.0195085	1.77501	0.558708	0.00901529	0.495754	1	0.0058542	-1.0588	0.672194
feature_4490	Ccdc107	0.0195085	1.77501	0.558708	0.00751275	0.206247	1	0.00624448	-0.845806	0.922058
feature_6258	Bmp3	0.0156068	2.06452	0.558708	0.00150255	-1.08921	0.921708	0.00507364	-0.251445	1
feature_9574	4933406I18Rik	0.0195085	1.77501	0.558708	0.00150255	-1.61972	0.567125	0.0078056	0.111125	1
feature_9718	Gdpd3	0.0156068	2.06452	0.558708	0.0030051	-0.421784	1	0.00468336	-0.580753	1
feature_10888	Ciao2b	0.0156068	2.06452	0.558708	0	-2.16721	0.488603	0.00546392	0.111125	1
feature_13205	Timm13	0.0156068	2.06452	0.558708	0.00901529	1.18763	0.85551	0.00312224	-1.76334	0.27854
feature_17858	Sap18	0.0156068	2.06452	0.558708	0.0030051	-0.421784	1	0.00468336	-0.580753	1
feature_20849	Myl12a	0.0195085	1.77501	0.558708	0.00150255	-1.61972	0.567125	0.0078056	0.111125	1
feature_4406	4933421O10Rik	0.0156068	2.51198	0.559177	0.00450765	0.495754	1	0.00273196	-1.47384	0.782598
feature_10448	Sh3rf1	0.0702306	-0.753642	0.559177	0.15927	0.527563	0.228478	0.115133	-0.230169	0.92309
feature_15285	Tnrc6c	0.0351153	-0.982786	0.561024	0.07663	0.0946555	1	0.0764949	0.217477	1
feature_7216	Akr1b10	0.0156068	2.06452	0.561598	0.00150255	-1.08921	0.925132	0.00507364	-0.251445	1
feature_22054	Jak2	0.0741323	0.862886	0.565325	0.0375637	-0.263238	1	0.0437114	-0.145512	1
feature_6795	Muc3a	0.0702306	0.92013	0.566244	0.0345586	-0.253184	1	0.0398086	-0.179655	1
feature_5358	Akr7a5	0.0156068	2.06452	0.570942	0.00150255	-1.08921	0.932413	0.00507364	-0.251445	1
feature_22759	Nono	0.039017	1.22627	0.574159	0.0195331	0.0807164	1	0.0175626	-0.535238	0.92309
feature_1115	Aldh9a1	0.0195085	1.84213	0.57573	0.0030051	-0.919284	0.924853	0.00702504	-0.22591	1
feature_750	Nckap5	0.0351153	-0.911233	0.576133	0.0841427	0.351364	0.85551	0.0698601	-0.0263787	1
feature_874	Lad1	0.0195085	1.98652	0.576133	0.00751275	0.417751	1	0.00507364	-1.12591	0.836181
feature_1065	Kifap3	0	-2.23316	0.576133	0.0180306	0.226567	1	0.0179529	0.380311	1
feature_1514	Mllt10	0.0936408	-0.675329	0.576133	0.14725	-0.0280193	1	0.156893	0.238284	0.922058
feature_2344	Vps18	0.0117051	2.47956	0.576133	0	-1.50425	0.85551	0.00312224	-0.303913	1
feature_3285	D3Ertd751e	0.0117051	2.47956	0.576133	0.0060102	1.40264	0.93345	0.00156112	-2.15191	0.245891
feature_3692	Cers2	0.0117051	2.47956	0.576133	0.0060102	1.40264	0.93345	0.00156112	-2.15191	0.245891
feature_3711	Aph1a	0.0234102	1.54995	0.576133	0.00450765	-0.963678	0.85551	0.0101473	-0.0408782	1
feature_6561	Gm42917	0.0117051	2.47956	0.576133	0.00150255	-0.378715	1	0.00273196	-0.795766	1
feature_7060	Pon2	0.0078034	-1.43798	0.576133	0.0240408	-0.291252	1	0.0331738	0.7045	0.592577
feature_8475	Irf2bp1	0.0117051	2.47956	0.576133	0.00150255	-0.378715	1	0.00273196	-0.795766	1
feature_9964	Rplp2	0.0546238	1.14698	0.576133	0.0435739	0.858324	0.488603	0.0214654	-1.12591	0.0796621
feature_10832	Dok4	0.0117051	2.47956	0.576133	0.00150255	-0.378715	1	0.00273196	-0.795766	1
feature_11288	Jrkl	0.0117051	2.47956	0.576133	0.00450765	0.910791	1	0.0019514	-1.69623	0.545973
feature_13019	Ccdc6	0.0078034	-1.42377	0.576133	0.0315535	0.182596	1	0.0308321	0.263128	1
feature_13379	Cep83os	0.0117051	2.47956	0.576133	0.00150255	-0.378715	1	0.00273196	-0.795766	1
feature_13638	Rdh9	0.0117051	2.47956	0.576133	0	-1.50425	0.85551	0.00312224	-0.303913	1
feature_14162	Irgm2	0.0234102	1.54995	0.576133	0.0120204	0.443286	1	0.00819588	-0.921297	0.700713
feature_14266	Ttc19	0.0078034	-1.43798	0.576133	0.0285484	-0.00674648	1	0.032003	0.44177	0.92309
feature_14813	Zfp652	0.0234102	-1.10541	0.576133	0.0525892	-0.0712867	1	0.0597129	0.400631	0.887631
feature_15129	Pitpnc1	0.0546238	1.14698	0.576133	0.0105178	-1.44285	0.182489	0.0300516	0.352133	1
feature_15649	Arl4a	0.0468204	1.10199	0.576133	0.0120204	-1.07129	0.401282	0.0261488	0.221308	1
feature_17387	Psmd6	0.0156068	2.16406	0.576133	0.00450765	0.173826	1	0.0039028	-1.01441	0.92309
feature_17712	Ndrg2	0.0117051	2.47956	0.576133	0.0030051	0.343751	1	0.00234168	-1.25145	0.890853
feature_18147	Gm36107	0.0156068	2.16406	0.576133	0.0030051	-0.334321	1	0.00429308	-0.69623	1
feature_18588	Naprt	0.0117051	2.47956	0.576133	0.00450765	0.910791	1	0.0019514	-1.69623	0.545973
feature_18695	Gga1	0.0234102	1.54995	0.576133	0.0150255	0.839708	0.877213	0.00741532	-1.23937	0.356126
feature_19861	Tiam2	0.0078034	-1.42377	0.576133	0.0375637	0.495754	0.85551	0.029271	-0.0332651	1
feature_20041	Hcfc1r1	0.0117051	2.47956	0.576133	0.00150255	-0.378715	1	0.00273196	-0.795766	1
feature_20379	Ndufa7	0.0312136	1.42709	0.576133	0.016528	0.380277	1	0.0117084	-0.841569	0.693651
feature_20666	AI661453	0.0234102	1.54995	0.576133	0.00901529	-0.0188193	1	0.00897644	-0.589315	0.983189
feature_23024	Tmsb4x	0.105346	0.856924	0.576133	0.016528	-2.04857	0.000250724	0.071031	0.75646	0.299957
feature_23061	mt-Atp8	0.0117051	2.47956	0.576133	0.0060102	1.40264	0.93345	0.00156112	-2.15191	0.245891
feature_552	B3gnt7	0.0273119	1.40155	0.579413	0.0135229	0.232719	1	0.0109278	-0.703319	0.892817
feature_5246	Sfn	0.0273119	1.40155	0.579413	0.00901529	-0.397331	1	0.0120987	-0.281193	1
feature_22251	Oga	0.0351153	-0.923408	0.582985	0.0631071	-0.172499	1	0.0761046	0.440432	0.63681
feature_5572	Ski	0.0078034	-1.45206	0.583097	0.030051	0.0636428	1	0.032003	0.37764	0.932315
feature_1537	Myo3a	0.120953	-0.607906	0.584065	0.157768	-0.262826	0.85551	0.197482	0.413972	0.29122
feature_9676	Arhgap17	0.0897391	0.758711	0.58463	0.046579	-0.328675	0.997032	0.0569809	-0.055525	1
feature_21104	Mep1b	0.0468204	1.08314	0.585722	0.0060102	-2.00675	0.0159973	0.0281002	0.628524	0.741928
feature_15314	Cbx4	0.0117051	2.64948	0.586314	0.00150255	-0.241212	1	0.00234168	-0.988411	0.978228
feature_16159	Yy1	0.0117051	-1.42733	0.588414	0.0495841	0.453934	0.85551	0.0394183	-0.0108657	1
feature_21526	Rab27b	0.0507221	-0.805258	0.588731	0.0946606	0.0750918	1	0.0948381	0.190113	1
feature_3182	Rpl22l1	0.0273119	1.60509	0.589525	0.0135229	0.448448	1	0.00897644	-0.976338	0.693651
feature_8327	Tmem238	0.0156068	2.16406	0.589525	0.00150255	-1.00675	1	0.00468336	-0.35836	1
feature_10050	Pet100	0.0273119	1.5202	0.592396	0.0105178	-0.0485667	1	0.0105376	-0.573373	0.980262
feature_11995	Tmod3	0.0117051	-1.24534	0.594835	0.0405688	0.318216	1	0.0355155	0.095528	1
feature_13349	Tmpo	0.0117051	-1.24534	0.594835	0.0525892	0.807698	0.308144	0.0323933	-0.366922	0.92309
feature_17398	Ngly1	0.0117051	-1.24534	0.594835	0.0315535	-0.118064	1	0.0378572	0.497016	0.83043
feature_18239	Nipbl	0.109248	-0.632088	0.594835	0.177301	0.0867909	1	0.173675	0.12739	1
feature_22116	Pcgf5	0.0117051	-1.24534	0.594835	0.0345586	0.0363222	1	0.0370766	0.356237	0.932315
feature_13506	Cnot2	0.0312136	-0.95538	0.595599	0.0856453	0.529306	0.488603	0.0628351	-0.178382	1
feature_11028	Znrf1	0.0117051	-1.25741	0.597497	0.0420714	0.368842	1	0.0355155	0.0497243	1
feature_16427	Zkscan3	0.0117051	-1.25741	0.597497	0.0285484	-0.297795	1	0.039028	0.660812	0.57439
feature_7	Mrpl15	0.0195085	1.71088	0.599194	0.0060102	-0.182318	1	0.00702504	-0.547838	1
feature_1755	Dnm1	0.0078034	3.23444	0.599194	0.00150255	0.758788	1	0.00078056	-1.88888	0.782598
feature_1768	Ak1	0.0078034	3.23444	0.599194	0.00150255	0.758788	1	0.00078056	-1.88888	0.782598
feature_1924	Itgb6	0.0663289	0.865211	0.599194	0.0285484	-0.528093	0.848716	0.0405891	0.0309545	1
feature_3554	Gba	0.0078034	3.23444	0.599194	0.00150255	0.758788	1	0.00078056	-1.88888	0.782598
feature_3679	Lysmd1	0.0078034	3.23444	0.599194	0.00150255	0.758788	1	0.00078056	-1.88888	0.782598
feature_5013	Zfp691	0.0078034	3.23444	0.599194	0	-0.504246	1	0.00117084	-1.0588	1
feature_5641	Akap9	0.105346	-0.627971	0.599194	0.169788	0.077556	1	0.16743	0.134804	1
feature_5905	Htt	0.0156068	-1.14753	0.599194	0.0480816	0.330695	1	0.0413697	0.058176	1
feature_6099	Slain2	0.0156068	-1.13711	0.599194	0.0450765	0.227558	1	0.04176	0.151767	1
feature_6817	Lrch4	0.0078034	3.23444	0.599194	0	-0.504246	1	0.00117084	-1.0588	1
feature_7174	Ahcyl2	0.0624272	-0.754908	0.599194	0.111189	0.0711303	1	0.11123	0.178239	1
feature_7496	Igkv1-110	0.0078034	3.23444	0.599194	0	-0.504246	1	0.00117084	-1.0588	1
feature_7914	Fxyd4	0.0078034	3.23444	0.599194	0	-0.504246	1	0.00117084	-1.0588	1
feature_7964	Gm16556	0.0078034	3.23444	0.599194	0	-0.504246	1	0.00117084	-1.0588	1
feature_8754	Lin37	0.0078034	3.23444	0.599194	0.00150255	0.758788	1	0.00078056	-1.88888	0.782598
feature_8784	Fxyd5	0.0078034	3.23444	0.599194	0	-0.504246	1	0.00117084	-1.0588	1
feature_8930	Cpt1c	0.0078034	3.23444	0.599194	0.00150255	0.758788	1	0.00078056	-1.88888	0.782598
feature_10097	Gm32540	0.0078034	3.23444	0.599194	0	-0.504246	1	0.00117084	-1.0588	1
feature_10534	Gdf15	0.0078034	3.23444	0.599194	0.0030051	1.66568	0.93345	0.00039028	-2.79577	0.339385
feature_10611	Large1	0.0312136	-0.961953	0.599194	0.0661122	0.0490075	1	0.068299	0.257674	0.957949
feature_11630	Il10ra	0.0078034	3.23444	0.599194	0	-0.504246	1	0.00117084	-1.0588	1
feature_11673	Ncam1	0.0078034	3.23444	0.599194	0	-0.504246	1	0.00117084	-1.0588	1
feature_12063	Bckdhb	0.039017	1.27602	0.599194	0.0225382	0.380277	1	0.0160015	-0.78196	0.662742
feature_12814	Smpd2	0.0078034	3.23444	0.599194	0.00150255	0.758788	1	0.00078056	-1.88888	0.782598
feature_13807	Abca13	0.0078034	3.23444	0.599194	0	-0.504246	1	0.00117084	-1.0588	1
feature_14775	Spag9	0.0702306	-0.728299	0.599194	0.130722	0.19142	1	0.119816	0.0650284	1
feature_14886	Plxdc1	0.0078034	3.23444	0.599194	0.00150255	0.758788	1	0.00078056	-1.88888	0.782598
feature_16956	Zfp87	0.0078034	3.23444	0.599194	0	-0.504246	1	0.00117084	-1.0588	1
feature_17069	Rasa1	0.0234102	-1.01077	0.599194	0.0706198	0.578216	0.488603	0.0503461	-0.206357	1
feature_18289	Basp1	0.0078034	3.23444	0.599194	0	-0.504246	1	0.00117084	-1.0588	1
feature_18581	Top1mt	0.0078034	3.23444	0.599194	0	-0.504246	1	0.00117084	-1.0588	1
feature_19101	Calcoco1	0.0078034	3.23444	0.599194	0.00150255	0.758788	1	0.00078056	-1.88888	0.782598
feature_19321	Hira	0.0117051	-1.28126	0.599194	0.0525892	0.758788	0.392521	0.0335641	-0.316296	0.978228
feature_20559	Ubd	0.0078034	3.23444	0.599194	0	-0.504246	1	0.00117084	-1.0588	1
feature_20846	Gm26510	0.0078034	3.23444	0.599194	0	-0.504246	1	0.00117084	-1.0588	1
feature_21665	Cabp4	0.0078034	3.23444	0.599194	0	-0.504246	1	0.00117084	-1.0588	1
feature_21843	Slc3a2	0.0312136	1.35998	0.599194	0.016528	0.308127	1	0.012489	-0.751372	0.78096
feature_21908	Cd6	0.0078034	3.23444	0.599194	0	-0.504246	1	0.00117084	-1.0588	1
feature_22052	Gm9895	0.0078034	3.23444	0.599194	0	-0.504246	1	0.00117084	-1.0588	1
feature_22388	Zfp950	0.0312136	-0.93548	0.599194	0.0691173	0.159572	1	0.0659573	0.154194	1
feature_22617	Mtm1	0.0195085	-1.19182	0.599194	0.0585994	0.29412	1	0.051517	0.0895917	1
feature_2007	Map3k20	0.0117051	-1.29303	0.599595	0.0405688	0.258715	1	0.0370766	0.156929	1
feature_12747	Hint3	0.039017	1.13163	0.600171	0.0120204	-0.771726	0.775837	0.0210751	0.0595946	1
feature_4516	Rnf38	0.0195085	-1.08748	0.60225	0.0450765	-0.0419029	1	0.0503461	0.378605	0.916362
feature_11910	Gm28379	0	-2.13188	0.60225	0.0135229	-0.120918	1	0.0175626	0.727796	0.868303
feature_16553	Uqcrfs1	0.0273119	1.56202	0.60225	0.00901529	-0.241212	1	0.0105376	-0.473838	1
feature_17430	Ppp3cb	0.0156068	-1.16814	0.60225	0.0450765	0.189423	1	0.0429308	0.191295	1
feature_16527	BC005537	0.0156068	-1.24776	0.602765	0.0360612	-0.286655	1	0.0483947	0.633966	0.553798
feature_15016	Mpp3	0.0156068	2.16406	0.605281	0.00450765	0.173826	1	0.0039028	-1.01441	0.92309
feature_18782	Xrcc6	0	-2.41661	0.605281	0.0195331	0.133184	1	0.0206848	0.473695	1
feature_7131	Cadps2	0.152166	-0.563865	0.60612	0.291495	0.49083	0.0983894	0.213483	-0.24617	0.726145
feature_2692	Rbck1	0.0273119	1.36408	0.606226	0.0105178	-0.204686	1	0.0120987	-0.380728	1
feature_4709	Ccdc171	0.0351153	1.24349	0.606226	0.0105178	-0.700643	0.85551	0.0175626	-0.0377385	1
feature_14914	Thra	0.0273119	1.36408	0.606226	0.0225382	1.12652	0.401282	0.00897644	-1.41244	0.0984808
feature_15505	Rock2	0.132658	-0.583179	0.606226	0.171291	-0.248719	0.85551	0.211922	0.394457	0.317265
feature_17112	Lhfpl2	0.0351153	1.24349	0.606226	0.0030051	-2.24121	0.0399577	0.019514	0.613625	0.880705
feature_20957	Ppm1b	0.0429187	-0.826251	0.606226	0.0721224	-0.150064	1	0.0850811	0.394059	0.693651
feature_5510	Eno1	0.0273119	1.5202	0.606377	0.00901529	-0.281854	1	0.0109278	-0.423212	1
feature_9611	Knop1	0.0234102	1.50264	0.60804	0.0105178	0.173826	1	0.00897644	-0.69623	0.92309
feature_19674	Nsun3	0.0234102	1.50264	0.60804	0.00901529	-0.066125	1	0.00936672	-0.530421	0.986005
feature_21170	Reep5	0.0234102	1.50264	0.60804	0.0105178	0.173826	1	0.00897644	-0.69623	0.92309
feature_3217	Pex5l	0.0156068	-1.18846	0.610818	0.0435739	0.104964	1	0.0441017	0.27159	1
feature_11232	Pard3	0.113149	-0.621047	0.613068	0.21787	0.415673	0.355756	0.168991	-0.163498	0.961505
feature_10477	Psd3	0.0702306	-0.746447	0.616111	0.123209	0.0634384	1	0.123719	0.180834	0.986005
feature_21441	Csnk1a1	0.101444	-0.631804	0.617088	0.15326	-0.0433547	1	0.164698	0.239449	0.890853
feature_14903	Mien1	0.0156068	2.06452	0.618071	0.00450765	0.0807164	1	0.00429308	-0.888875	0.959983
feature_8315	Ptprh	0.0702306	0.875042	0.618314	0.0330561	-0.373002	0.988243	0.04176	-0.0765021	1
feature_21556	Zbtb7c	0.0039017	-1.54034	0.618372	0.0285484	0.621285	0.85551	0.0206848	-0.111268	1
feature_2263	Kif18a	0.0039017	-1.55997	0.619922	0.0180306	-0.196124	1	0.0238071	0.673004	0.726145
feature_13311	Hsp90b1	0.0858374	0.780727	0.619922	0.060102	0.20945	1	0.0495656	-0.451118	0.666964
feature_19339	Yeats2	0.0039017	-1.55997	0.619922	0.0345586	0.965239	0.308144	0.019514	-0.445268	0.92309
feature_6837	Mcm7	0.0117051	2.47956	0.621631	0.00150255	-0.378715	1	0.00273196	-0.795766	1
feature_10004	Kcnq1	0.039017	-0.839454	0.622747	0.0901529	0.389402	0.789737	0.0725921	-0.0766903	1
feature_3198	Prkci	0.0039017	-1.57934	0.62338	0.0315535	0.758788	0.638172	0.0206848	-0.242512	1
feature_16518	Slc17a4	0.0039017	-1.57934	0.62338	0.0060102	-1.76728	0.0726937	0.0273196	2.09095	0.00394245
feature_20633	Yipf3	0.0117051	2.47956	0.62338	0.00150255	-0.378715	1	0.00273196	-0.795766	1
feature_998	Tor1aip2	0.0741323	0.821663	0.623904	0.0270459	-0.831227	0.376211	0.0480045	0.232431	1
feature_22690	Tbl1x	0.039017	-0.851088	0.625265	0.0721224	-0.025673	1	0.078056	0.294571	0.92309
feature_17007	Slc9a3	0.078034	0.812981	0.629145	0.0225382	-1.19541	0.0496197	0.0522975	0.433053	0.782598
feature_1876	Rnd3	0.0975425	0.957604	0.62946	0.0225382	-1.39502	0.106702	0.0593226	0.425998	0.92309
feature_14231	Flii	0.0351153	1.21652	0.62946	0.0195331	0.244215	1	0.0156112	-0.639848	0.788626
feature_22838	Nox1	0.0039017	-1.59845	0.62946	0.0405688	1.24422	0.0541497	0.0187334	-0.717109	0.619001
feature_889	Ddx59	0.0078034	3.23444	0.629555	0.00150255	0.758788	1	0.00078056	-1.88888	0.791836
feature_1655	Wdr5	0.0156068	2.06452	0.629555	0.00901529	1.18763	0.85551	0.00312224	-1.76334	0.339468
feature_10631	Tmem184c	0.0078034	3.23444	0.629555	0.00150255	0.758788	1	0.00078056	-1.88888	0.791836
feature_14205	Mprip	0.039017	-0.86263	0.629555	0.0706198	-0.0757881	1	0.0792269	0.340607	0.838969
feature_3972	Stxbp3	0.0507221	1.15306	0.629926	0.0240408	-0.0797483	1	0.0241974	-0.403448	0.957949
feature_3503	Mrpl24	0.039017	1.13163	0.630289	0.0240408	0.335289	1	0.0179529	-0.674136	0.726145
feature_19283	Thap7	0.0078034	3.23444	0.630767	0	-0.504246	1	0.00117084	-1.0588	1
feature_12114	Plscr1	0.0858374	0.763653	0.631731	0.0525892	-0.0439794	1	0.0522975	-0.255003	0.978228
feature_1310	Brox	0	-1.93548	0.633337	0.016528	0.456225	1	0.0140501	0.150653	1
feature_3842	Gm15886	0	-1.93548	0.633337	0.00751275	-0.760586	0.879332	0.0163918	1.36746	0.291188
feature_4546	Xpa	0	-1.93548	0.633337	0.0150255	0.29222	1	0.0144404	0.314658	1
feature_4748	Ift74	0	-1.90511	0.633337	0.0180306	0.651873	0.973064	0.0132695	-0.0449943	1
feature_5906	Msantd1	0.0078034	3.23444	0.633337	0	-0.504246	1	0.00117084	-1.0588	1
feature_7150	Arf5	0.0351153	1.29898	0.633337	0.0105178	-0.647204	0.910441	0.016782	-0.101869	1
feature_7408	9130019P16Rik	0	-1.90511	0.633337	0.0120204	-0.0347609	1	0.0148306	0.64164	0.92309
feature_8029	Ncapd2	0	-1.90511	0.633337	0.0180306	0.651873	0.973064	0.0132695	-0.0449943	1
feature_9709	Nupr1	0.280922	0.459928	0.633337	0.157768	-0.497425	0.199591	0.218557	0.182286	0.92309
feature_9712	Sult1a1	0	-1.93548	0.633337	0.0105178	-0.276836	1	0.0156112	0.883714	0.745876
feature_10641	Mmaa	0	-1.93548	0.633337	0.0210357	0.900144	0.749006	0.0128792	-0.293265	1
feature_11359	Fdx2	0.0078034	3.23444	0.633337	0.00150255	0.758788	1	0.00078056	-1.88888	0.793367
feature_11424	Herpud2	0	-1.90511	0.633337	0.0060102	-1.02362	0.738839	0.0163918	1.6305	0.156999
feature_12195	Ryk	0	-1.93548	0.633337	0.016528	0.456225	1	0.0140501	0.150653	1
feature_12880	Gopc	0.0117051	-1.41661	0.633337	0.0390663	0.041188	1	0.04176	0.374159	0.943766
feature_16897	Fancc	0	-1.93548	0.633337	0.016528	0.456225	1	0.0140501	0.150653	1
feature_18251	Prlr	0	-1.93548	0.633337	0.0105178	-0.276836	1	0.0156112	0.883714	0.745876
feature_18474	Tmem65	0	-1.93548	0.633337	0.0180306	0.611231	0.985593	0.0136598	-0.00435236	1
feature_22977	Bclaf3	0	-1.93548	0.633337	0.0210357	0.900144	0.749006	0.0128792	-0.293265	1
feature_4920	Foxd2	0.0078034	3.23444	0.633755	0	-0.504246	1	0.00117084	-1.0588	1
feature_7176	Nrf1	0.0351153	-0.867794	0.633755	0.0856453	0.438851	0.722232	0.0667379	-0.113662	1
feature_7248	Ubn2	0.0702306	-0.789091	0.633755	0.124712	0.0342419	1	0.128012	0.215681	0.959028
feature_266	Hibch	0	-1.96523	0.634628	0.00901529	-0.538193	1	0.0163918	1.14507	0.477539
feature_301	Spats2l	0.078034	0.784412	0.634628	0.0420714	-0.241212	1	0.0483947	-0.122763	1
feature_571	Neu2	0	-1.99437	0.634628	0.0180306	0.533229	1	0.0144404	0.0736502	1
feature_1544	Mastl	0	-1.96523	0.634628	0.0135229	0.0807164	1	0.0152209	0.526162	0.923179
feature_2990	Vapb	0	-1.96523	0.634628	0.016528	0.417751	1	0.0144404	0.189127	1
feature_4905	Slc5a9	0	-1.99437	0.634628	0.0405688	2.36451	1.6832e-05	0.00858616	-1.75763	0.00441529
feature_4934	Mob3c	0.0117051	2.32755	0.634628	0.00450765	0.758788	1	0.00234168	-1.47384	0.726145
feature_5566	Pank4	0.0117051	2.32755	0.634628	0.0060102	1.23272	0.964369	0.0019514	-1.88888	0.343027
feature_5581	Nadk	0.0351153	1.19005	0.634628	0.0150255	-0.21474	1	0.0171723	-0.303913	1
feature_7043	Rfc3	0.0117051	2.32755	0.634628	0.0030051	0.206247	1	0.00273196	-1.0588	0.978228
feature_7072	Tac1	0.0195085	1.64948	0.634628	0.030051	3.30311	2.23416e-06	0.00117084	-4.17428	4.86754e-09
feature_7253	Hipk2	0.0156068	-1.29538	0.634628	0.0195331	-1.29184	0.0970097	0.0546392	1.49579	0.00594375
feature_7553	Usp39	0.0117051	2.32755	0.634628	0.00450765	0.758788	1	0.00234168	-1.47384	0.726145
feature_7631	Dguok	0	-1.96523	0.634628	0.0120204	-0.106911	1	0.0156112	0.713789	0.858877
feature_8033	Cd27	0.0156068	1.97141	0.634628	0.00751275	0.758788	1	0.0039028	-1.33633	0.647521
feature_8584	Gsk3a	0.0195085	1.64948	0.634628	0.0060102	-0.241212	1	0.00741532	-0.473838	1
feature_12656	Arfgef3	0.0507221	-0.791091	0.634628	0.115696	0.459228	0.52289	0.0882033	-0.155084	1
feature_12992	Ctnna3	0.0078034	3.23444	0.634628	0	-0.504246	1	0.00117084	-1.0588	1
feature_13069	Dip2a	0	-1.96523	0.634628	0.0180306	0.571703	1	0.0140501	0.035176	1
feature_14381	Tmem256	0.0117051	2.32755	0.634628	0.00450765	0.758788	1	0.00234168	-1.47384	0.726145
feature_14428	Spag7	0.0117051	2.32755	0.634628	0.00450765	0.758788	1	0.00234168	-1.47384	0.726145
feature_14649	Nle1	0.0117051	2.32755	0.634628	0.00450765	0.758788	1	0.00234168	-1.47384	0.726145
feature_14699	Appbp2os	0.0117051	2.32755	0.634628	0.00450765	0.758788	1	0.00234168	-1.47384	0.726145
feature_15397	Foxk2	0.0039017	-1.63592	0.634628	0.030051	0.590391	0.85551	0.022246	-0.0752883	1
feature_15587	Sh3yl1	0.0351153	1.3567	0.634628	0.0150255	-0.0448145	1	0.0148306	-0.510364	0.932315
feature_15621	Hdac9	0	-1.96523	0.634628	0.0030051	-1.88891	0.183221	0.0179529	2.49579	0.0126906
feature_15690	Hectd1	0.0351153	-0.892776	0.634628	0.0796351	0.273361	1	0.0698601	0.0407355	1
feature_16149	Ccdc85c	0.0273119	1.40155	0.634628	0.0150255	0.410865	1	0.0105376	-0.836408	0.779989
feature_16587	Psmg4	0.0117051	2.32755	0.634628	0.00450765	0.758788	1	0.00234168	-1.47384	0.726145
feature_17061	Mef2c	0.0624272	0.968761	0.634628	0.00150255	-3.87348	5.86624e-06	0.04176	1.11112	0.144104
feature_17404	Thrb	0.101444	-0.645479	0.634628	0.172793	0.154063	1	0.161576	0.0733828	1
feature_17972	Adamdec1	0.0117051	2.32755	0.634628	0	-1.61972	0.85551	0.00351252	-0.15191	1
feature_18669	Eif3d	0.0117051	2.32755	0.634628	0.00450765	0.758788	1	0.00234168	-1.47384	0.726145
feature_18799	Cyp2d22	0.0117051	2.32755	0.634628	0.00450765	0.758788	1	0.00234168	-1.47384	0.726145
feature_19017	Gm17057	0	-1.96523	0.634628	0.00901529	-0.538193	1	0.0163918	1.14507	0.477539
feature_20450	1110038B12Rik	0.0195085	1.64948	0.634628	0.0060102	-0.241212	1	0.00741532	-0.473838	1
feature_21713	Yif1a	0.0117051	2.32755	0.634628	0.00150255	-0.504246	1	0.00312224	-0.625841	1
feature_21810	Fkbp2	0.0117051	2.32755	0.634628	0.00150255	-0.504246	1	0.00312224	-0.625841	1
feature_21987	Anxa1	0.0195085	1.64948	0.634628	0.0105178	0.621285	1	0.00624448	-1.08681	0.619001
feature_22099	Ifit2	0.0117051	2.47956	0.634628	0	-1.50425	0.973988	0.00312224	-0.303913	1
feature_4113	Aimp1	0.0312136	1.534	0.636436	0.0105178	-0.241212	1	0.0120987	-0.473838	1
feature_6838	Ap4m1	0.0234102	1.45684	0.636436	0.016528	0.910791	0.85551	0.0078056	-1.25145	0.303956
feature_21725	D330050I16Rik	0.0078034	3.23444	0.636436	0.00150255	0.758788	1	0.00078056	-1.88888	0.8025
feature_14543	Nsrp1	0.0429187	1.12592	0.636877	0.0195331	-0.178018	1	0.0214654	-0.310339	1
feature_12915	Sowahc	0.0117051	2.47956	0.636884	0.00150255	-0.378715	1	0.00273196	-0.795766	1
feature_19950	Dact2	0.0117051	2.47956	0.636884	0.00150255	-0.378715	1	0.00273196	-0.795766	1
feature_20759	Ndufa11	0.0195085	1.71088	0.63701	0.00901529	0.42864	1	0.00624448	-0.971337	0.842256
feature_22041	Rfx3	0.0156068	-1.26699	0.637795	0.030051	-0.603782	0.85551	0.0507364	0.915729	0.241136
feature_2069	Zfp385b	0.0234102	1.50264	0.642448	0.0030051	-1.4636	0.536203	0.0109278	0.214218	1
feature_8782	Lsr	0	-1.96523	0.642448	0.0225382	0.993254	0.566658	0.0128792	-0.386375	1
feature_2738	Chmp4b	0.078034	0.775013	0.64257	0.0540918	0.181645	1	0.0456628	-0.424085	0.765744
feature_7557	Rnf181	0.0195085	1.71088	0.64257	0.0060102	-0.182318	1	0.00702504	-0.547838	1
feature_19644	Tfg	0	-2.45904	0.64257	0.016528	-0.192302	1	0.022246	0.799181	0.880314
feature_7918	Bms1	0	-2.02294	0.64257	0.0060102	-1.15194	0.571728	0.0179529	1.75882	0.101259
feature_17121	Pde8b	0.0195085	-1.07844	0.64257	0.0751275	0.920252	0.0723182	0.0421503	-0.513008	0.633898
feature_18026	Gm49171	0	-2.02294	0.64257	0.00751275	-0.857883	0.85551	0.0175626	1.46476	0.190518
feature_21972	Prune2	0	-2.02294	0.64257	0.0060102	-1.15194	0.571728	0.0179529	1.75882	0.101259
feature_5962	Fbxl5	0.0195085	-1.14926	0.643148	0.0285484	-0.854743	0.356567	0.0573712	1.09176	0.0529169
feature_17957	Bnip3l	0.0234102	1.54995	0.646659	0.00901529	-0.0188193	1	0.00897644	-0.589315	1
feature_10542	Mpv17l2	0.0117051	2.47956	0.647301	0.00450765	0.910791	1	0.0019514	-1.69623	0.619001
feature_14777	Tob1	0.0429187	1.10516	0.647332	0.0120204	-0.939183	0.575778	0.0238071	0.158431	1
feature_14950	Jup	0.0429187	1.10516	0.647332	0.0180306	-0.327368	1	0.022246	-0.200819	1
feature_3612	S100a1	0.0195085	1.77501	0.647466	0.0060102	-0.120918	1	0.00663476	-0.625841	1
feature_1728	Tor1a	0.0156068	1.88395	0.648835	0.0030051	-0.582249	1	0.00546392	-0.374302	1
feature_5077	Sf3a3	0.0156068	1.88395	0.648835	0.0060102	0.315182	1	0.00468336	-0.943323	0.92309
feature_7065	Slc25a13	0.0078034	-1.30471	0.648835	0.0240408	-0.135602	1	0.0296613	0.545021	0.838969
feature_8126	Ybx3	0.039017	1.17818	0.648835	0.0255433	0.495754	1	0.016782	-0.821761	0.571613
feature_12790	Traf3ip2	0.0078034	-1.30471	0.648835	0.0360612	0.574825	0.85551	0.0265391	-0.120201	1
feature_13336	Slc5a8	0.078034	0.765675	0.648835	0.0435739	-0.202218	1	0.048785	-0.140414	1
feature_15170	Map2k6	0.0117051	-1.3278	0.648835	0.0540918	0.751011	0.484935	0.0347349	-0.303913	1
feature_15767	Klhdc2	0.0156068	1.88395	0.648835	0.00450765	-0.0892086	1	0.00507364	-0.666483	1
feature_19254	Pkp2	0.0078034	-1.30471	0.648835	0.030051	0.244215	1	0.0281002	0.192425	1
feature_19369	1300002E11Rik	0.0156068	2.06452	0.648835	0.0030051	-0.421784	1	0.00468336	-0.580753	1
feature_21413	Chsy3	0.0156068	1.88395	0.648835	0	-2.3116	0.401278	0.00624448	0.291697	1
feature_4122	Tet2	0.0156068	-1.14753	0.648884	0.0420714	0.0932073	1	0.0429308	0.276184	1
feature_6525	Med13l	0.0468204	-0.804896	0.648884	0.0676147	-0.373002	0.85551	0.093277	0.575072	0.249294
feature_12052	Hmgn3	0.0078034	3.23444	0.648884	0	-0.504246	1	0.00117084	-1.0588	1
feature_15329	Rptor	0.0273119	-0.927947	0.648884	0.0570969	0.0441905	1	0.0593226	0.259988	0.978228
feature_8094	Clec2e	0	-2.05096	0.652961	0.0030051	-1.97818	0.148284	0.0191237	2.58506	0.00651683
feature_18917	Gxylt1	0.0078034	-1.33541	0.653425	0.016528	-0.760586	0.700571	0.0323933	1.11112	0.158751
feature_22732	Ophn1	0.0078034	-1.33541	0.653425	0.0375637	0.611231	0.766963	0.0269293	-0.15191	1
feature_2633	Naa20	0.0429187	1.0847	0.65916	0.0195331	-0.220453	1	0.022246	-0.259713	1
feature_17158	Ankra2	0.0234102	1.45684	0.660479	0.0060102	-0.684818	1	0.0105376	-0.125914	1
feature_2874	Slpi	0.0195085	1.71088	0.667938	0.0030051	-1.03476	0.946791	0.0078056	-0.0815202	1
feature_5334	Hp1bp3	0.0078034	-1.36547	0.668424	0.0330561	0.337492	1	0.0288807	0.111125	1
feature_3914	Cept1	0.0702306	-0.687553	0.668463	0.0976657	-0.271494	0.922331	0.124109	0.451258	0.404818
feature_22516	Rpl39	0.0351153	1.27097	0.668463	0.0270459	0.902379	0.657404	0.0128792	-1.19373	0.148532
feature_23046	Gm28588	0.0117051	2.47956	0.668463	0	-1.50425	1	0.00312224	-0.303913	1
feature_173	Mrpl30	0.0117051	2.32755	0.668613	0.00450765	0.758788	1	0.00234168	-1.47384	0.753272
feature_11384	Ldlr	0.0195085	-1.12311	0.671971	0.0736249	0.817682	0.206171	0.0444919	-0.409707	0.885967
feature_19223	Mrtfb	0.0546238	-0.733646	0.671971	0.124712	0.542296	0.278323	0.0893742	-0.243057	0.92309
feature_1	Xkr4	0.0624272	-0.710138	0.672474	0.139737	0.547842	0.221268	0.0995214	-0.255197	0.92309
feature_29	Mcmdc2	0.0039017	4.64948	0.672474	0	1.08072	1	0	-2.47384	0.92309
feature_35	Arfgef1	0.0663289	-0.700229	0.672474	0.120204	0.172639	1	0.11162	0.0763594	1
feature_55	Rpl7	0.0351153	1.21652	0.672474	0.0255433	0.727079	0.85551	0.0140501	-1.01927	0.305489
feature_146	Gm38033	0.0039017	4.64948	0.672474	0	1.08072	1	0	-2.47384	0.92309
feature_227	Tex30	0.0117051	2.19005	0.672474	0.0060102	1.08072	1	0.00234168	-1.66648	0.588108
feature_259	Gls	0.0351153	-0.842371	0.672474	0.0540918	-0.339187	0.91617	0.0733727	0.564843	0.394165
feature_409	Mreg	0.0039017	4.64948	0.672474	0	1.08072	1	0	-2.47384	0.92309
feature_520	4933436I20Rik	0.0039017	4.64948	0.672474	0	1.08072	1	0	-2.47384	0.92309
feature_574	Sag	0.0039017	4.64948	0.672474	0	1.08072	1	0	-2.47384	0.92309
feature_616	Espnl	0.0039017	4.64948	0.672474	0	1.08072	1	0	-2.47384	0.92309
feature_675	Pam	0.0273119	-0.950431	0.672474	0.0646096	0.236367	1	0.058542	0.0921418	1
feature_680	Gm7967	0.0039017	4.64948	0.672474	0	1.08072	1	0	-2.47384	0.92309
feature_738	Insig2	0.0312136	1.29585	0.672474	0.0105178	-0.473872	1	0.0148306	-0.188435	1
feature_781	Pigr	0.319939	0.417191	0.672474	0.289992	0.294767	0.64221	0.228704	-0.385145	0.186225
feature_794	Avpr1b	0.0039017	4.64948	0.672474	0	1.08072	1	0	-2.47384	0.92309
feature_804	Mfsd4a	0.0156068	-1.11605	0.672474	0.0616045	0.843677	0.173917	0.0366863	-0.427544	0.842289
feature_847	Platr1	0.0039017	4.64948	0.672474	0	1.08072	1	0	-2.47384	0.92309
feature_909	Dennd1b	0.140461	-0.552576	0.672474	0.138235	-0.667837	0.0309162	0.229485	0.717059	0.00239692
feature_969	Npl	0.0039017	4.64948	0.672474	0	1.08072	1	0	-2.47384	0.92309
feature_1078	Gm32391	0.0039017	4.64948	0.672474	0	1.08072	1	0	-2.47384	0.92309
feature_1106	Ildr2	0.0039017	4.64948	0.672474	0	1.08072	1	0	-2.47384	0.92309
feature_1111	Fam78b	0.0039017	4.64948	0.672474	0	1.08072	1	0	-2.47384	0.92309
feature_1159	Usp21	0.0117051	2.32755	0.672474	0.0030051	0.206247	1	0.00273196	-1.0588	0.983189
feature_1218	Ifi207	0.0039017	4.64948	0.672474	0	1.08072	1	0	-2.47384	0.92309
feature_1274	Stum	0.0039017	4.64948	0.672474	0	1.08072	1	0	-2.47384	0.92309
feature_1281	H3f3a	0.0507221	1.04745	0.672474	0.0180306	-0.645109	0.879332	0.0281002	0.0155472	1
feature_1628	Notch1	0.0195085	1.64948	0.672474	0.0060102	-0.241212	1	0.00741532	-0.473838	1
feature_1686	Gm13420	0.0039017	4.64948	0.672474	0	1.08072	1	0	-2.47384	0.92309
feature_1696	Sptan1	0.0195085	-1.03234	0.672474	0.0360612	-0.352243	1	0.0503461	0.64164	0.468337
feature_1784	Slc2a8	0.0078034	2.91252	0.672474	0.00150255	0.495754	1	0.00117084	-1.47384	0.92309
feature_1862	Zeb2os	0.0039017	4.64948	0.672474	0	1.08072	1	0	-2.47384	0.92309
feature_1922	Pla2r1	0.0039017	4.64948	0.672474	0	1.08072	1	0	-2.47384	0.92309
feature_1967	Lrp2	0.0039017	4.64948	0.672474	0	1.08072	1	0	-2.47384	0.92309
feature_1995	Hat1	0.0234102	1.36937	0.672474	0.00751275	-0.463604	1	0.0109278	-0.200819	1
feature_2116	Lrrc55	0.0039017	4.64948	0.672474	0	1.08072	1	0	-2.47384	0.92309
feature_2134	Olfr1247	0.0039017	4.64948	0.672474	0	1.08072	1	0	-2.47384	0.92309
feature_2140	Agbl2	0.0039017	4.64948	0.672474	0	1.08072	1	0	-2.47384	0.92309
feature_2158	Pacsin3	0.0078034	2.91252	0.672474	0.00150255	0.495754	1	0.00117084	-1.47384	0.92309
feature_2187	Prdm11	0.0078034	2.91252	0.672474	0.00150255	0.495754	1	0.00117084	-1.47384	0.92309
feature_2424	Slc30a4	0.0117051	-1.22088	0.672474	0.016528	-1.10251	0.200323	0.0409794	1.34719	0.0176489
feature_2550	5330413P13Rik	0.0039017	4.64948	0.672474	0	1.08072	1	0	-2.47384	0.92309
feature_2647	Cd93	0.0039017	4.64948	0.672474	0	1.08072	1	0	-2.47384	0.92309
feature_2740	Raly	0.0156068	1.80149	0.672474	0.0030051	-0.656249	1	0.0058542	-0.281193	1
feature_2778	Cnbd2	0.0117051	2.19005	0.672474	0	-1.72664	0.85551	0.0039028	-0.014406	1
feature_2804	Manbal	0.0195085	1.77501	0.672474	0	-2.67417	0.412308	0.00819588	0.400631	1
feature_2881	Dbndd2	0.0117051	2.19005	0.672474	0.0030051	0.0807164	1	0.00312224	-0.888875	0.983189
feature_2943	Gm14320	0.0039017	4.64948	0.672474	0	1.08072	1	0	-2.47384	0.92309
feature_2957	Atp9a	0.0663289	0.775013	0.672474	0.0751275	1.12379	0.00706426	0.0316127	-1.20375	0.000679969
feature_2976	Rtf2	0.0156068	1.80149	0.672474	0.0030051	-0.656249	1	0.0058542	-0.281193	1
feature_3006	Gm14391	0.0039017	4.64948	0.672474	0	1.08072	1	0	-2.47384	0.92309
feature_3021	Gm14296	0.0078034	2.91252	0.672474	0	-0.726639	1	0.00156112	-0.736872	1
feature_3049	Adrm1	0.0117051	2.19005	0.672474	0.0060102	1.08072	1	0.00234168	-1.66648	0.588108
feature_3081	Stmn3	0.0039017	4.64948	0.672474	0	1.08072	1	0	-2.47384	0.92309
feature_3096	Tcea2	0.0039017	4.64948	0.672474	0	1.08072	1	0	-2.47384	0.92309
feature_3110	Gm16685	0.0663289	0.936764	0.672474	0.0270459	-0.541721	0.87242	0.0386377	9.35436e-05	1
feature_3142	Sirpb1b	0.0039017	4.64948	0.672474	0	1.08072	1	0	-2.47384	0.92309
feature_3540	1500004A13Rik	0.0039017	-1.45904	0.672474	0.0255433	0.522721	0.93345	0.0199043	-0.0213254	1
feature_3625	Sprr2a1	0.0039017	4.64948	0.672474	0	1.08072	1	0	-2.47384	0.92309
feature_3630	Sprr2h	0.0117051	2.19005	0.672474	0	-1.72664	0.85551	0.0039028	-0.014406	1
feature_3640	Gm9117	0.0039017	4.64948	0.672474	0	1.08072	1	0	-2.47384	0.92309
feature_3729	Hist2h2aa1	0.0039017	4.64948	0.672474	0	1.08072	1	0	-2.47384	0.92309
feature_3809	Gm42938	0.0039017	4.64948	0.672474	0	1.08072	1	0	-2.47384	0.92309
feature_4091	Rrh	0.0039017	4.64948	0.672474	0	1.08072	1	0	-2.47384	0.92309
feature_4114	Tbck	0.0117051	-1.35052	0.672474	0.0315535	-0.241212	1	0.0413697	0.623773	0.705055
feature_4143	Ppp3ca	0.144363	-0.526757	0.672474	0.238905	0.260537	0.809448	0.205678	-0.0514953	1
feature_4150	H2afz	0.0351153	1.16406	0.672474	0.0195331	0.187632	1	0.0163918	-0.571135	0.904186
feature_4157	Gm43691	0.0039017	4.64948	0.672474	0	1.08072	1	0	-2.47384	0.92309
feature_4161	Adh7	0.0039017	4.64948	0.672474	0	1.08072	1	0	-2.47384	0.92309
feature_4302	Sdr16c6	0.0039017	4.64948	0.672474	0	1.08072	1	0	-2.47384	0.92309
feature_4303	Penk	0.0039017	4.64948	0.672474	0	1.08072	1	0	-2.47384	0.92309
feature_4425	Mob3b	0.0624272	-0.663935	0.672474	0.132224	0.501167	0.337923	0.0971798	-0.222299	0.923326
feature_4512	Glipr2	0.0078034	2.91252	0.672474	0.00150255	0.495754	1	0.00117084	-1.47384	0.92309
feature_4617	Musk	0.0039017	4.64948	0.672474	0	1.08072	1	0	-2.47384	0.92309
feature_4857	1700047F07Rik	0.0039017	4.64948	0.672474	0	1.08072	1	0	-2.47384	0.92309
feature_4954	Nasp	0.0039017	-1.50027	0.672474	0.0225382	0.247826	1	0.0214654	0.246054	1
feature_5076	Fhl3	0.0039017	4.64948	0.672474	0	1.08072	1	0	-2.47384	0.92309
feature_5151	Gm12976	0.0039017	4.64948	0.672474	0	1.08072	1	0	-2.47384	0.92309
feature_5232	Cd164l2	0.0039017	4.64948	0.672474	0	1.08072	1	0	-2.47384	0.92309
feature_5233	Map3k6	0.0039017	4.64948	0.672474	0	1.08072	1	0	-2.47384	0.92309
feature_5245	Gpn2	0.0078034	2.91252	0.672474	0	-0.726639	1	0.00156112	-0.736872	1
feature_5262	Cnksr1	0.0195085	1.59059	0.672474	0.00450765	-0.674171	1	0.00819588	-0.184331	1
feature_5287	Gm15979	0.0039017	4.64948	0.672474	0	1.08072	1	0	-2.47384	0.92309
feature_5297	Fuca1	0.0663289	0.819407	0.672474	0.0330561	-0.338236	1	0.0409794	-0.0678453	1
feature_5300	Lypla2	0.0312136	1.26482	0.672474	0.0195331	0.495754	1	0.0128792	-0.845806	0.612644
feature_5394	Zbtb17	0.0156068	1.80149	0.672474	0.00150255	-1.3116	0.85551	0.00624448	0.0286627	1
feature_5580	Gnb1	0.0546238	-0.747408	0.672474	0.0916555	-0.0365497	1	0.0991312	0.272588	0.92309
feature_5647	Gm43112	0.0039017	4.64948	0.672474	0	1.08072	1	0	-2.47384	0.92309
feature_5704	Cacna2d1	0.0195085	1.64948	0.672474	0.00150255	-1.72664	0.68172	0.00858616	0.242369	1
feature_5787	Cnpy1	0.0039017	4.64948	0.672474	0	1.08072	1	0	-2.47384	0.92309
feature_5840	Gm9970	0.0039017	4.64948	0.672474	0	1.08072	1	0	-2.47384	0.92309
feature_5963	Bst1	0.0039017	4.64948	0.672474	0	1.08072	1	0	-2.47384	0.92309
feature_5993	Gm36814	0.0039017	4.64948	0.672474	0	1.08072	1	0	-2.47384	0.92309
feature_6029	Pgm2	0.0078034	-1.38027	0.672474	0.0225382	-0.328675	1	0.032003	0.731277	0.561242
feature_6033	Gm31363	0.0078034	2.91252	0.672474	0	-0.726639	1	0.00156112	-0.736872	1
feature_6123	Gm42800	0.0039017	4.64948	0.672474	0	1.08072	1	0	-2.47384	0.92309
feature_6147	Hopx	0.0234102	1.41244	0.672474	0.0240408	1.64462	0.0734406	0.00624448	-1.90994	0.00684214
feature_6173	Ugt2b36	0.0039017	4.64948	0.672474	0	1.08072	1	0	-2.47384	0.92309
feature_6239	Cxcl13	0.0039017	4.64948	0.672474	0	1.08072	1	0	-2.47384	0.92309
feature_6452	Gltp	0.0117051	2.19005	0.672474	0	-1.72664	0.85551	0.0039028	-0.014406	1
feature_6521	Gm9754	0.0039017	4.64948	0.672474	0	1.08072	1	0	-2.47384	0.92309
feature_6538	Slc8b1	0.0156068	1.88395	0.672474	0.0120204	1.5502	0.580276	0.00312224	-2.00435	0.120105
feature_6605	Rhof	0.0117051	2.32755	0.672474	0.0030051	0.206247	1	0.00273196	-1.0588	0.92309
feature_6758	Tmem120a	0.0117051	2.19005	0.672474	0.0060102	1.08072	1	0.00234168	-1.66648	0.588108
feature_6762	Hspb1	0.0039017	4.64948	0.672474	0	1.08072	1	0	-2.47384	0.92309
feature_6800	Trip6	0.0039017	4.64948	0.672474	0	1.08072	1	0	-2.47384	0.92309
feature_6927	Kdelr2	0.0117051	-1.26938	0.672474	0.0330561	-0.068147	1	0.0382475	0.455079	0.92309
feature_6965	Cyp3a44	0.0039017	4.64948	0.672474	0	1.08072	1	0	-2.47384	0.92309
feature_7010	Alox5ap	0.0039017	4.64948	0.672474	0	1.08072	1	0	-2.47384	0.92309
feature_7104	D830026I12Rik	0.0039017	4.64948	0.672474	0	1.08072	1	0	-2.47384	0.92309
feature_7107	Cav1	0.0039017	4.64948	0.672474	0	1.08072	1	0	-2.47384	0.92309
feature_7136	Ndufa5	0.0156068	1.97141	0.672474	0.0135229	1.94321	0.281169	0.00234168	-2.47384	0.0515622
feature_7285	Trbc1	0.0039017	4.64948	0.672474	0	1.08072	1	0	-2.47384	0.92309
feature_7301	Tas2r143	0.0039017	4.64948	0.672474	0	1.08072	1	0	-2.47384	0.92309
feature_7391	Hoxa11	0.0039017	4.64948	0.672474	0	1.08072	1	0	-2.47384	0.92309
feature_7409	Prr15	0.0078034	2.91252	0.672474	0	-0.726639	1	0.00156112	-0.736872	1
feature_7450	Fam13a	0.0663289	-0.660373	0.672474	0.103676	-0.0426661	1	0.11201	0.253144	0.92309
feature_7497	Igkv2-109	0.0039017	4.64948	0.672474	0	1.08072	1	0	-2.47384	0.92309
feature_7522	Igkv3-12	0.0039017	4.64948	0.672474	0	1.08072	1	0	-2.47384	0.92309
feature_7558	Vamp5	0.0039017	4.64948	0.672474	0	1.08072	1	0	-2.47384	0.92309
feature_7671	Snrpg	0.0156068	1.88395	0.672474	0.00751275	0.665679	1	0.00429308	-1.2108	0.728037
feature_7720	Kbtbd12	0.0039017	4.64948	0.672474	0	1.08072	1	0	-2.47384	0.92309
feature_7835	Lhfpl4	0.0039017	4.64948	0.672474	0	1.08072	1	0	-2.47384	0.92309
feature_7978	Clec4a2	0.0039017	4.64948	0.672474	0	1.08072	1	0	-2.47384	0.92309
feature_8011	P3h3	0.0039017	4.64948	0.672474	0	1.08072	1	0	-2.47384	0.92309
feature_8026	Nop2	0.0117051	2.19005	0.672474	0.00150255	-0.619723	1	0.00351252	-0.473838	1
feature_8117	Klra5	0.0039017	4.64948	0.672474	0	1.08072	1	0	-2.47384	0.92309
feature_8225	Gm15706	0.0078034	2.91252	0.672474	0.00150255	0.495754	1	0.00117084	-1.47384	0.92309
feature_8242	Ppfibp1	0.0078034	-1.42377	0.672474	0.0255433	-0.175623	1	0.0323933	0.596552	0.817055
feature_8254	Ergic2	0.0039017	-1.45904	0.672474	0.0210357	0.180252	1	0.0210751	0.307522	1
feature_8296	Lair1	0.0078034	2.91252	0.672474	0	-0.726639	1	0.00156112	-0.736872	1
feature_8303	Lilra5	0.0039017	4.64948	0.672474	0	1.08072	1	0	-2.47384	0.92309
feature_8354	Gm36371	0.0078034	2.91252	0.672474	0	-0.726639	1	0.00156112	-0.736872	1
feature_8398	1810019N24Rik	0.0039017	4.64948	0.672474	0	1.08072	1	0	-2.47384	0.92309
feature_8485	Snrpd2	0.0078034	2.91252	0.672474	0.00150255	0.495754	1	0.00117084	-1.47384	0.92309
feature_8497	Gm44698	0.0039017	4.64948	0.672474	0	1.08072	1	0	-2.47384	0.92309
feature_8541	Nlrp4e	0.0039017	4.64948	0.672474	0	1.08072	1	0	-2.47384	0.92309
feature_8596	Erich4	0.0039017	4.64948	0.672474	0	1.08072	1	0	-2.47384	0.92309
feature_8610	Cyp2b13	0.0039017	4.64948	0.672474	0	1.08072	1	0	-2.47384	0.92309
feature_8627	Shkbp1	0.0156068	1.80149	0.672474	0.0030051	-0.656249	1	0.0058542	-0.281193	1
feature_8746	Nfkbid	0.0078034	2.91252	0.672474	0	-0.726639	1	0.00156112	-0.736872	1
feature_8866	Zfp936	0.0039017	4.64948	0.672474	0	1.08072	1	0	-2.47384	0.92309
feature_8895	Acp4	0.0039017	4.64948	0.672474	0	1.08072	1	0	-2.47384	0.92309
feature_8908	Spib	0.0039017	4.64948	0.672474	0	1.08072	1	0	-2.47384	0.92309
feature_8941	Rcn3	0.0039017	4.64948	0.672474	0	1.08072	1	0	-2.47384	0.92309
feature_8945	Rps11	0.0312136	1.29585	0.672474	0.0195331	0.530519	1	0.012489	-0.888875	0.545973
feature_8971	Plekha4	0.0039017	4.64948	0.672474	0	1.08072	1	0	-2.47384	0.92309
feature_9020	Gm45309	0.0039017	4.64948	0.672474	0	1.08072	1	0	-2.47384	0.92309
feature_9046	Prmt3	0	-2.28126	0.672474	0.0375637	1.61123	0.0848142	0.0136598	-1.00435	0.545973
feature_9081	Ndn	0.0039017	4.64948	0.672474	0	1.08072	1	0	-2.47384	0.92309
feature_9238	Ap3b2	0.0039017	4.64948	0.672474	0	1.08072	1	0	-2.47384	0.92309
feature_9260	Mex3b	0.0039017	4.64948	0.672474	0	1.08072	1	0	-2.47384	0.92309
feature_9291	Tyr	0.0039017	4.64948	0.672474	0	1.08072	1	0	-2.47384	0.92309
feature_9375	Serpinh1	0.0039017	4.64948	0.672474	0	1.08072	1	0	-2.47384	0.92309
feature_9385	Spcs2	0.0312136	1.26482	0.672474	0.00901529	-0.726639	0.85551	0.0156112	-0.0231762	1
feature_9442	Stim1	0.0741323	-0.646975	0.672474	0.126214	0.132555	1	0.120206	0.0971857	1
feature_9477	Olfr655	0.0039017	4.64948	0.672474	0	1.08072	1	0	-2.47384	0.92309
feature_9485	Gm45885	0.0039017	4.64948	0.672474	0	1.08072	1	0	-2.47384	0.92309
feature_9516	Olfr482	0.0039017	4.64948	0.672474	0	1.08072	1	0	-2.47384	0.92309
feature_9556	Dkk3	0.0039017	4.64948	0.672474	0	1.08072	1	0	-2.47384	0.92309
feature_9689	Il21r	0.0078034	2.91252	0.672474	0	-0.726639	1	0.00156112	-0.736872	1
feature_9725	Aldoa.1	0.0039017	4.64948	0.672474	0	1.08072	1	0	-2.47384	0.92309
feature_9791	Vkorc1	0.0039017	4.64948	0.672474	0	1.08072	1	0	-2.47384	0.92309
feature_9832	Btbd16	0.0039017	4.64948	0.672474	0	1.08072	1	0	-2.47384	0.92309
feature_9855	Fam53b	0.0078034	2.91252	0.672474	0.0030051	1.34375	1	0.00078056	-2.2108	0.545973
feature_9942	Pkp3	0.0234102	1.36937	0.672474	0.0060102	-0.767281	0.91617	0.0113181	-0.0263787	1
feature_10034	LTO1	0.0156068	1.80149	0.672474	0.0105178	1.17383	0.7665	0.0039028	-1.59937	0.270626
feature_10188	Nek5	0.0039017	4.64948	0.672474	0	1.08072	1	0	-2.47384	0.92309
feature_10421	Gpm6a	0.0039017	4.64948	0.672474	0	1.08072	1	0	-2.47384	0.92309
feature_10533	Lrrc25	0.0039017	4.64948	0.672474	0	1.08072	1	0	-2.47384	0.92309
feature_10543	Ifi30	0.0195085	1.64948	0.672474	0.00450765	-0.619723	1	0.0078056	-0.251445	1
feature_10639	Zfp827	0.0156068	-1.25741	0.672474	0.0435739	0.0218227	1	0.0468336	0.357563	0.932315
feature_10775	Chd9	0.0585255	-0.797601	0.672474	0.0781326	-0.476765	0.651814	0.115523	0.653019	0.151541
feature_10944	Psmb10	0.0156068	1.80149	0.672474	0.00751275	0.578216	1	0.00468336	-1.09533	0.845291
feature_10967	Chtf8	0.0039017	4.64948	0.672474	0	1.08072	1	0	-2.47384	0.92309
feature_10979	Nfat5	0.0468204	-0.953859	0.672474	0.0751275	-0.365799	0.914834	0.103424	0.604165	0.359912
feature_10997	Ap1g1	0.0312136	-0.87408	0.672474	0.093158	0.800608	0.0665506	0.0562003	-0.443676	0.628277
feature_11152	A530010L16Rik	0.0039017	4.64948	0.672474	0	1.08072	1	0	-2.47384	0.92309
feature_11246	4930433N12Rik	0.0039017	4.64948	0.672474	0	1.08072	1	0	-2.47384	0.92309
feature_11354	S1pr2	0.0039017	4.64948	0.672474	0	1.08072	1	0	-2.47384	0.92309
feature_11369	Cdkn2d	0.0078034	2.91252	0.672474	0	-0.726639	1	0.00156112	-0.736872	1
feature_11441	Ntm	0.0039017	4.64948	0.672474	0	1.08072	1	0	-2.47384	0.92309
feature_11512	Siae	0.0117051	2.19005	0.672474	0.0030051	0.0807164	1	0.00312224	-0.888875	0.983189
feature_11545	Gm48742	0.0039017	4.64948	0.672474	0	1.08072	1	0	-2.47384	0.92309
feature_11682	Tex12	0.0117051	2.32755	0.672474	0.0060102	1.23272	1	0.0019514	-1.88888	0.397371
feature_11705	Gm47854	0.0039017	4.64948	0.672474	0	1.08072	1	0	-2.47384	0.92309
feature_11735	Acsbg1	0.0039017	4.64948	0.672474	0	1.08072	1	0	-2.47384	0.92309
feature_11961	BC065403	0.0039017	4.64948	0.672474	0	1.08072	1	0	-2.47384	0.92309
feature_12003	Fam83b	0.0234102	-0.918202	0.672474	0.0315535	-0.698257	0.488603	0.0562003	0.898717	0.106305
feature_12019	Gsta1	0.0078034	2.91252	0.672474	0	-0.726639	1	0.00156112	-0.736872	1
feature_12110	Tbc1d2b	0.0195085	1.534	0.672474	0.00751275	-0.0347609	1	0.0078056	-0.540952	1
feature_12122	Slc9a9	0.0312136	1.26482	0.672474	0.0060102	-1.26978	0.434137	0.0163918	0.251987	1
feature_12134	Xrn1	0.0468204	-0.76382	0.672474	0.093158	0.231448	1	0.08352	0.0455365	1
feature_12255	Gm37612	0.0039017	4.64948	0.672474	0	1.08072	1	0	-2.47384	0.92309
feature_12336	Celsr3	0.0039017	4.64948	0.672474	0	1.08072	1	0	-2.47384	0.92309
feature_12472	Eif1b	0.0156068	2.06452	0.672474	0.00751275	0.858324	1	0.00351252	-1.47384	0.626273
feature_12496	Gm47112	0.0039017	4.64948	0.672474	0	1.08072	1	0	-2.47384	0.92309
feature_12503	Gm47117	0.0039017	4.64948	0.672474	0	1.08072	1	0	-2.47384	0.92309
feature_12537	Slc6a20a	0.0039017	4.64948	0.672474	0	1.08072	1	0	-2.47384	0.92309
feature_12611	Utrn	0.144363	-0.555861	0.672474	0.198336	-0.107175	1	0.221679	0.269056	0.726145
feature_12624	Gm32105	0.0039017	4.64948	0.672474	0	1.08072	1	0	-2.47384	0.92309
feature_12625	Hivep2	0.0624272	-0.701847	0.672474	0.07663	-0.504246	0.492138	0.115133	0.648153	0.101259
feature_12644	Gm47771	0.0039017	4.64948	0.672474	0	1.08072	1	0	-2.47384	0.92309
feature_12650	Reps1	0.0078034	-1.49348	0.672474	0.0405688	0.548221	0.85551	0.0304419	-0.0769475	1
feature_12759	Clvs2	0.0039017	4.64948	0.672474	0	1.08072	1	0	-2.47384	0.92309
feature_12773	Tspyl4	0.0039017	4.64948	0.672474	0	1.08072	1	0	-2.47384	0.92309
feature_12792	Rev3l	0.039017	-0.773729	0.672474	0.0631071	-0.165444	1	0.0753241	0.398155	0.730977
feature_12825	Afg1l	0.0156068	-1.27652	0.672474	0.0525892	0.331778	1	0.0452725	0.074599	1
feature_12858	4930431F10Rik	0.0039017	4.64948	0.672474	0	1.08072	1	0	-2.47384	0.92309
feature_12907	Smpdl3a	0.0312136	1.23444	0.672474	0.0120204	-0.334321	1	0.0152209	-0.239372	1
feature_13042	Adora2a	0.0039017	4.64948	0.672474	0	1.08072	1	0	-2.47384	0.92309
feature_13082	Col6a1	0.0039017	4.64948	0.672474	0	1.08072	1	0	-2.47384	0.92309
feature_13165	Cirbp	0.0195085	1.59059	0.672474	0.0120204	0.79121	0.93345	0.00624448	-1.19373	0.480813
feature_13202	Lsm7	0.0195085	1.59059	0.672474	0.0060102	-0.297795	1	0.0078056	-0.403448	1
feature_13208	Gng7	0.0039017	4.64948	0.672474	0	1.08072	1	0	-2.47384	0.92309
feature_13243	S1pr4	0.0039017	4.64948	0.672474	0	1.08072	1	0	-2.47384	0.92309
feature_13303	A230060F14Rik	0.0039017	4.64948	0.672474	0	1.08072	1	0	-2.47384	0.92309
feature_13320	Igf1os	0.0039017	4.64948	0.672474	0	1.08072	1	0	-2.47384	0.92309
feature_13489	Trhde	0.0039017	4.64948	0.672474	0	1.08072	1	0	-2.47384	0.92309
feature_13511	Rab3ip	0.0195085	-1.05096	0.672474	0.0631071	0.612163	0.488603	0.0441017	-0.22591	1
feature_13568	Gm48435	0.0039017	4.64948	0.672474	0	1.08072	1	0	-2.47384	0.92309
feature_13630	Stat6	0.0195085	1.534	0.672474	0.0030051	-1.1923	0.77692	0.00897644	0.111125	1
feature_13654	Spryd4	0.0039017	4.64948	0.672474	0	1.08072	1	0	-2.47384	0.92309
feature_13678	Rps26	0.0507221	0.981104	0.672474	0.0450765	0.864988	0.308144	0.0226362	-1.05063	0.0560096
feature_13691	Sarnp	0.0117051	-1.22088	0.672474	0.0435739	0.479812	0.85551	0.0339544	-0.0588001	1
feature_13800	Igfbp3	0.0039017	4.64948	0.672474	0	1.08072	1	0	-2.47384	0.92309
feature_13872	Xpo1	0.0195085	-1.08748	0.672474	0.07663	0.948266	0.0775102	0.0421503	-0.538543	0.597577
feature_13911	Eml6	0.0312136	1.26482	0.672474	0.0150255	0.0482949	1	0.0140501	-0.512312	0.935399
feature_13969	A230004M16Rik	0.0039017	4.64948	0.672474	0	1.08072	1	0	-2.47384	0.92309
feature_14054	Ltc4s	0.0039017	4.64948	0.672474	0	1.08072	1	0	-2.47384	0.92309
feature_14131	Gpx3	0.0039017	4.64948	0.672474	0	1.08072	1	0	-2.47384	0.92309
feature_14365	Sat2	0.0039017	4.64948	0.672474	0	1.08072	1	0	-2.47384	0.92309
feature_14408	Rnasek	0.0117051	2.19005	0.672474	0.0030051	0.0807164	1	0.00312224	-0.888875	0.983189
feature_14424	Rnf167	0.0312136	1.2047	0.672474	0.0105178	-0.56314	0.939813	0.0160015	-0.0815202	1
feature_14508	Mir22hg	0	-2.2085	0.672474	0.00751275	-1.06224	0.744397	0.0202946	1.66912	0.151508
feature_14640	Ccl8	0.0039017	4.64948	0.672474	0	1.08072	1	0	-2.47384	0.92309
feature_14658	Slfn1	0.0039017	4.64948	0.672474	0	1.08072	1	0	-2.47384	0.92309
feature_14695	Znhit3	0.0078034	2.91252	0.672474	0.00150255	0.495754	1	0.00117084	-1.47384	0.92309
feature_14749	C030037D09Rik	0.0078034	2.91252	0.672474	0	-0.726639	1	0.00156112	-0.736872	1
feature_14940	Krt36	0.0039017	4.64948	0.672474	0	1.08072	1	0	-2.47384	0.92309
feature_15053	Acbd4	0.0117051	2.19005	0.672474	0.00450765	0.621285	1	0.00273196	-1.28119	0.782598
feature_15056	Fmnl1	0.0078034	2.91252	0.672474	0	-0.726639	1	0.00156112	-0.736872	1
feature_15150	Rgs9	0.0039017	4.64948	0.672474	0	1.08072	1	0	-2.47384	0.92309
feature_15217	Slc16a5	0.0078034	2.91252	0.672474	0.0030051	1.34375	1	0.00078056	-2.2108	0.545973
feature_15269	St6galnac2.1	0.0039017	4.64948	0.672474	0	1.08072	1	0	-2.47384	0.92309
feature_15327	Nptx1	0.0039017	4.64948	0.672474	0	1.08072	1	0	-2.47384	0.92309
feature_15441	Atad2b	0.039017	-0.815899	0.672474	0.060102	-0.296441	0.985593	0.0788366	0.519073	0.455814
feature_15481	Gm47833	0.0039017	4.64948	0.672474	0	1.08072	1	0	-2.47384	0.92309
feature_15556	Gm17746	0.0039017	4.64948	0.672474	0	1.08072	1	0	-2.47384	0.92309
feature_15686	Scfd1	0.0273119	-0.897412	0.672474	0.0570969	0.0807164	1	0.0577615	0.221769	1
feature_15703	Gm47552	0.0039017	4.64948	0.672474	0	1.08072	1	0	-2.47384	0.92309
feature_15733	BC042761	0.0078034	2.91252	0.672474	0.00150255	0.495754	1	0.00117084	-1.47384	0.92309
feature_16104	Asb2	0.0078034	2.91252	0.672474	0	-0.726639	1	0.00156112	-0.736872	1
feature_16203	Eif5	0.0507221	0.949042	0.672474	0.0240408	-0.291252	1	0.0288807	-0.15191	1
feature_16227	Akt1	0.0195085	1.64948	0.672474	0.0120204	0.858324	0.964369	0.0058542	-1.28119	0.544059
feature_16231	Ahnak2	0.0078034	2.91252	0.672474	0	-0.726639	1	0.00156112	-0.736872	1
feature_16279	Ighv10-1	0.0039017	4.64948	0.672474	0	1.08072	1	0	-2.47384	0.92309
feature_16318	Gm47695	0.0039017	4.64948	0.672474	0	1.08072	1	0	-2.47384	0.92309
feature_16391	Gm48503	0.0039017	4.64948	0.672474	0	1.08072	1	0	-2.47384	0.92309
feature_16457	Gm11290	0.0039017	4.64948	0.672474	0	1.08072	1	0	-2.47384	0.92309
feature_16521	Carmil1	0.0468204	-0.76382	0.672474	0.103676	0.42864	0.666891	0.080788	-0.13095	1
feature_16590	Pxdc1	0.0078034	2.91252	0.672474	0.00150255	0.495754	1	0.00117084	-1.47384	0.92309
feature_16615	F13a1	0.0039017	4.64948	0.672474	0	1.08072	1	0	-2.47384	0.92309
feature_16689	Rnf182	0.0039017	4.64948	0.672474	0	1.08072	1	0	-2.47384	0.92309
feature_16736	Fam120a	0.120953	0.583393	0.672474	0.0856453	0.0198341	1	0.0819588	-0.228472	0.935399
feature_16739	Card19	0.0117051	2.19005	0.672474	0.0030051	0.0807164	1	0.00312224	-0.888875	0.983189
feature_16844	Gm48357	0.0039017	4.64948	0.672474	0	1.08072	1	0	-2.47384	0.92309
feature_16896	Gm30409	0.0039017	4.64948	0.672474	0	1.08072	1	0	-2.47384	0.92309
feature_17107	Dmgdh	0.0039017	4.64948	0.672474	0	1.08072	1	0	-2.47384	0.92309
feature_17185	Naip6	0.0351153	-0.848769	0.672474	0.0796351	0.327809	0.91617	0.0671282	-0.0164893	1
feature_17210	Erbin	0.175577	-0.495841	0.672474	0.156265	-0.765371	0.00301639	0.276709	0.769019	0.000300733
feature_17399	5430414B19Rik	0.0039017	4.64948	0.672474	0	1.08072	1	0	-2.47384	0.92309
feature_17405	Gm48321	0.0039017	-1.4798	0.672474	0.0195331	0.0300903	1	0.0218557	0.452162	0.93675
feature_17448	Kat6b	0.0312136	-0.853018	0.672474	0.0555943	-0.122567	1	0.0647865	0.386305	0.8025
feature_17468	Gm17105	0.0039017	4.64948	0.672474	0	1.08072	1	0	-2.47384	0.92309
feature_17589	Bmpr1a	0.0351153	-0.917333	0.672474	0.0856453	0.376455	0.85551	0.0698601	-0.0480737	1
feature_17596	A930038B10Rik	0.0039017	4.64948	0.672474	0	1.08072	1	0	-2.47384	0.92309
feature_17604	Nrg3	0.0039017	4.64948	0.672474	0	1.08072	1	0	-2.47384	0.92309
feature_17752	Traj4	0.0039017	4.64948	0.672474	0	1.08072	1	0	-2.47384	0.92309
feature_17763	Lrp10	0.0273119	1.36408	0.672474	0.0105178	-0.204686	1	0.0120987	-0.380728	1
feature_17783	Efs	0.0039017	4.64948	0.672474	0	1.08072	1	0	-2.47384	0.92309
feature_17887	Sacs	0.0078034	2.91252	0.672474	0	-0.726639	1	0.00156112	-0.736872	1
feature_18055	Gm48969	0.0039017	4.64948	0.672474	0	1.08072	1	0	-2.47384	0.92309
feature_18110	4930517O19Rik	0.0039017	-1.52044	0.672474	0.0120204	-0.771726	0.775837	0.0245876	1.20423	0.217884
feature_18198	Ggact	0.0078034	-1.38027	0.672474	0.0360612	0.476645	0.91617	0.0284905	-0.0192718	1
feature_18240	Gm31282	0.0039017	4.64948	0.672474	0	1.08072	1	0	-2.47384	0.92309
feature_18278	4921515E04Rik	0.0039017	4.64948	0.672474	0	1.08072	1	0	-2.47384	0.92309
feature_18304	Ctnnd2	0.0078034	2.91252	0.672474	0	-0.726639	1	0.00156112	-0.736872	1
feature_18438	Ccn3	0.0039017	4.64948	0.672474	0	1.08072	1	0	-2.47384	0.92309
feature_18479	Mtss1	0.0624272	-0.68932	0.672474	0.120204	0.291283	0.85551	0.102644	-0.0293564	1
feature_18542	Chrac1	0.0078034	2.91252	0.672474	0.00150255	0.495754	1	0.00117084	-1.47384	0.92309
feature_18563	Ly6k	0.0039017	4.64948	0.672474	0	1.08072	1	0	-2.47384	0.92309
feature_18579	Zfp41	0.0039017	4.64948	0.672474	0	1.08072	1	0	-2.47384	0.92309
feature_18627	Adck5	0.0195085	1.534	0.672474	0.00450765	-0.726639	0.958813	0.00858616	-0.120201	1
feature_18630	Vps28	0.0156068	1.80149	0.672474	0.00751275	0.578216	1	0.00468336	-1.09533	0.820929
feature_18687	Cyth4	0.0078034	2.91252	0.672474	0	-0.726639	1	0.00156112	-0.736872	1
feature_18713	Gm10863	0.0039017	4.64948	0.672474	0	1.08072	1	0	-2.47384	0.92309
feature_18903	Alg10b	0.0039017	4.64948	0.672474	0	1.08072	1	0	-2.47384	0.92309
feature_18914	Pdzrn4	0.0039017	4.64948	0.672474	0	1.08072	1	0	-2.47384	0.92309
feature_19100	Atp5g2	0.039017	1.10891	0.672474	0.0270459	0.521289	0.982544	0.0175626	-0.808257	0.502932
feature_19205	Litaf	0.0741323	0.781586	0.672474	0.0390663	-0.283337	1	0.0464433	-0.090509	1
feature_19253	Spidr	0.0156068	-1.16814	0.672474	0.0585994	0.674724	0.491523	0.0394183	-0.260844	1
feature_19284	Gm49785	0.0039017	4.64948	0.672474	0	1.08072	1	0	-2.47384	0.92309
feature_19298	Dgcr6	0.0039017	4.64948	0.672474	0	1.08072	1	0	-2.47384	0.92309
feature_19324	Iglc3	0.0117051	2.32755	0.672474	0.00150255	-0.504246	1	0.00312224	-0.625841	1
feature_19424	Gm26569	0.0039017	4.64948	0.672474	0	1.08072	1	0	-2.47384	0.92309
feature_19483	Gm17106	0.0039017	-1.74284	0.672474	0.0240408	0.0596547	1	0.0261488	0.4437	0.983189
feature_19501	Mylk	0.0195085	1.534	0.672474	0.00751275	-0.0347609	1	0.0078056	-0.540952	1
feature_19538	Rabl3	0.0195085	1.71088	0.672474	0.0030051	-1.03476	0.964369	0.0078056	-0.0815202	1
feature_19636	Rpl24	0.0312136	1.32755	0.672474	0.0225382	0.832789	0.757596	0.0113181	-1.15191	0.257328
feature_19710	Btg3	0.0117051	-1.18341	0.672474	0.0150255	-1.20132	0.15144	0.0401989	1.41925	0.0143128
feature_19726	Cyyr1	0.0078034	2.91252	0.672474	0	-0.726639	1	0.00156112	-0.736872	1
feature_19777	Dnajc28	0.0039017	4.64948	0.672474	0	1.08072	1	0	-2.47384	0.92309
feature_19844	Pcp4	0.0039017	4.64948	0.672474	0	1.08072	1	0	-2.47384	0.92309
feature_19919	Prkn	0.0663289	-0.668433	0.672474	0.133727	0.407663	0.571728	0.104985	-0.138489	1
feature_19923	4732491K20Rik	0.0039017	4.64948	0.672474	0	1.08072	1	0	-2.47384	0.92309
feature_19942	Tcp10b	0.0039017	4.64948	0.672474	0	1.08072	1	0	-2.47384	0.92309
feature_20016	Gm10226	0.0039017	4.64948	0.672474	0	1.08072	1	0	-2.47384	0.92309
feature_20275	Gm36199	0.0039017	4.64948	0.672474	0	1.08072	1	0	-2.47384	0.92309
feature_20311	Rsph1	0.0039017	4.64948	0.672474	0	1.08072	1	0	-2.47384	0.92309
feature_20378	Rps28	0.0585255	1.02013	0.672474	0.0826402	2.00543	6.00607e-06	0.016782	-2.16415	6.02278e-08
feature_20393	AA388235	0.0039017	4.64948	0.672474	0	1.08072	1	0	-2.47384	0.92309
feature_20405	Gm50335	0.0039017	4.64948	0.672474	0	1.08072	1	0	-2.47384	0.92309
feature_20452	Hspa1a	0.0039017	4.64948	0.672474	0	1.08072	1	0	-2.47384	0.92309
feature_20552	H2-M5	0.0039017	4.64948	0.672474	0	1.08072	1	0	-2.47384	0.92309
feature_20835	Gm36487	0.0039017	4.64948	0.672474	0	1.08072	1	0	-2.47384	0.92309
feature_20853	Emilin2	0.0039017	4.64948	0.672474	0	1.08072	1	0	-2.47384	0.92309
feature_20861	Gm30091	0.0039017	4.64948	0.672474	0	1.08072	1	0	-2.47384	0.92309
feature_20910	Atl2	0.0117051	-1.1707	0.672474	0.0255433	-0.378715	1	0.0370766	0.718807	0.471608
feature_21123	Elp2	0.0156068	1.80149	0.672474	0.0060102	0.232719	1	0.00507364	-0.836408	0.92309
feature_21240	Gm10544	0.0039017	4.64948	0.672474	0	1.08072	1	0	-2.47384	0.92309
feature_21315	Prelid2	0.0039017	-1.70807	0.672474	0.0270459	0.306276	1	0.0245876	0.204234	1
feature_21331	Spink1	0.0585255	-0.997976	0.672474	0.0255433	-2.3896	7.88508e-07	0.149477	2.06673	7.54966e-08
feature_21436	Slc26a2	0.0975425	0.742591	0.672474	0.0570969	-0.141676	1	0.0608837	-0.179217	1
feature_21453	Htr4	0.0624272	-0.672446	0.672474	0.135229	0.533229	0.252605	0.0971798	-0.24952	0.92309
feature_21488	Ccbe1	0.0039017	4.64948	0.672474	0	1.08072	1	0	-2.47384	0.92309
feature_21512	Seh1l	0.0195085	1.71088	0.672474	0.00751275	0.142117	1	0.00663476	-0.763344	0.923326
feature_21610	Cndp1	0.0039017	4.64948	0.672474	0	1.08072	1	0	-2.47384	0.92309
feature_21733	Ctsw	0.0039017	4.64948	0.672474	0	1.08072	1	0	-2.47384	0.92309
feature_21737	Snx32	0.0078034	2.91252	0.672474	0	-0.726639	1	0.00156112	-0.736872	1
feature_21829	2700081O15Rik	0.0078034	2.91252	0.672474	0.0030051	1.34375	1	0.00078056	-2.2108	0.545973
feature_21890	Tmem258	0.0156068	1.80149	0.672474	0.00901529	0.888071	0.980461	0.00429308	-1.34831	0.545973
feature_21921	1700017D01Rik	0.0039017	4.64948	0.672474	0	1.08072	1	0	-2.47384	0.92309
feature_22022	Gm50341	0.0039017	4.64948	0.672474	0	1.08072	1	0	-2.47384	0.92309
feature_22112	Htr7	0.0039017	4.64948	0.672474	0	1.08072	1	0	-2.47384	0.92309
feature_22201	Hpse2	0.0039017	4.64948	0.672474	0	1.08072	1	0	-2.47384	0.92309
feature_22210	BC037704	0.0039017	4.64948	0.672474	0	1.08072	1	0	-2.47384	0.92309
feature_22325	Gm16299	0.0039017	4.64948	0.672474	0	1.08072	1	0	-2.47384	0.92309
feature_22404	Syp	0.0039017	4.64948	0.672474	0	1.08072	1	0	-2.47384	0.92309
feature_22456	Med14	0.0117051	-1.22088	0.672474	0.0345586	0.065766	1	0.0362961	0.325864	0.977532
feature_22460	2010308F09Rik	0.0039017	4.64948	0.672474	0	1.08072	1	0	-2.47384	0.92309
feature_22463	Cask	0.039017	-0.913454	0.672474	0.0781326	0.0404525	1	0.080788	0.249322	0.980262
feature_22561	Firre	0.0117051	-1.4798	0.672474	0.0405688	0.0300903	1	0.0437114	0.392145	0.978228
feature_22601	Fgf13	0.0117051	2.47956	0.672474	0.0030051	0.343751	1	0.00234168	-1.25145	0.92309
feature_22610	Gm14698	0.0039017	4.64948	0.672474	0	1.08072	1	0	-2.47384	0.92309
feature_22611	Aff2	0.0039017	4.64948	0.672474	0	1.08072	1	0	-2.47384	0.92309
feature_22658	Renbp	0.0039017	4.64948	0.672474	0	1.08072	1	0	-2.47384	0.92309
feature_22704	Arx	0.0039017	4.64948	0.672474	0	1.08072	1	0	-2.47384	0.92309
feature_22733	Yipf6	0	-2.15787	0.672474	0.016528	0.173826	1	0.0171723	0.433053	1
feature_22748	Dlg3	0.0039017	-1.52044	0.672474	0.0195331	-0.0188193	1	0.0226362	0.501915	0.92309
feature_22775	Chic1	0.0039017	-1.4798	0.672474	0.0255433	0.495754	1	0.0202946	0.0061553	1
feature_22830	Nap1l3	0.0039017	4.64948	0.672474	0	1.08072	1	0	-2.47384	0.92309
feature_22945	Hsd17b10	0.0078034	2.91252	0.672474	0	-0.726639	1	0.00156112	-0.736872	1
feature_23075	AC168977.1	0.0039017	4.64948	0.672474	0	1.08072	1	0	-2.47384	0.92309
feature_17820	Cideb	0.0117051	2.19005	0.673104	0.00150255	-0.619723	1	0.00351252	-0.473838	1
feature_19194	Ciita	0.0234102	1.32755	0.673104	0.0030051	-1.61972	0.428918	0.012489	0.400631	1
feature_19252	Cebpd	0.0234102	1.32755	0.673104	0.0120204	0.206247	1	0.0101473	-0.625841	0.92309
feature_20973	Cript	0.0234102	1.32755	0.673104	0.0120204	0.206247	1	0.0101473	-0.625841	0.92309
feature_21688	Pcx	0.0234102	1.32755	0.673104	0.0150255	0.585952	1	0.00936672	-0.917444	0.656113
feature_9124	Mef2a	0.0429187	-0.765555	0.673778	0.0555943	-0.516846	0.618552	0.0850811	0.68624	0.159717
feature_14986	Ezh1	0.0507221	0.886981	0.675988	0.0285484	-0.073089	1	0.029271	-0.270304	1
feature_11904	Ppib	0.0312136	1.32755	0.678222	0.0135229	-0.0567872	1	0.0136598	-0.473838	1
feature_2022	Wipf1	0.039017	-0.791953	0.67833	0.07663	0.151799	1	0.0729824	0.126555	1
feature_5135	Phc2	0.039017	1.10891	0.67833	0.0240408	0.310198	1	0.0183432	-0.643763	0.721482
feature_2514	Tgm3	0.0312136	1.17555	0.679254	0.0435739	2.12963	4.91833e-05	0.0078056	-2.32945	1.2157e-06
feature_21575	Setbp1	0.163871	-0.507336	0.679254	0.219372	-0.0924764	1	0.241974	0.242369	0.791836
feature_263	Mfsd6	0.0702306	-0.633972	0.680943	0.103676	-0.107413	1	0.117084	0.30035	0.812252
feature_10444	Clcn3	0.0507221	-0.728038	0.681445	0.0841427	-0.0405899	1	0.0913256	0.273396	0.92309
feature_22400	Ppp1r3f	0.0078034	2.91252	0.681575	0	-0.726639	1	0.00156112	-0.736872	1
feature_12182	Stag1	0.078034	-0.648198	0.682811	0.0976657	-0.398451	0.68172	0.135427	0.542841	0.190518
feature_1391	Gm10516	0.0156068	1.72348	0.683537	0.00450765	-0.241212	1	0.0058542	-0.473838	1
feature_3685	Cdc42se1	0.0156068	1.72348	0.683537	0.0060102	0.154717	1	0.00546392	-0.736872	0.979168
feature_7453	Tigd2	0.0156068	1.72348	0.683537	0.0030051	-0.726639	1	0.00624448	-0.19373	1
feature_7998	Phb2	0.0156068	1.72348	0.683537	0.0120204	1.34375	0.597917	0.0039028	-1.71485	0.183345
feature_12698	Tbpl1	0.0156068	1.72348	0.683537	0.00751275	0.495754	1	0.00507364	-0.988411	0.857281
feature_5555	Tprgl	0.0117051	2.19005	0.683705	0.00450765	0.621285	1	0.00273196	-1.28119	0.824471
feature_5632	2510017J16Rik	0.0078034	2.91252	0.683705	0.00450765	2.08072	0.757596	0.00039028	-3.0588	0.22259
feature_16393	Cdk13	0.0702306	-0.645622	0.683705	0.115696	0.0714978	1	0.115133	0.150653	1
feature_75	Pkhd1	0.0195085	-0.965228	0.683968	0.0435739	0.0450924	1	0.0456628	0.279522	0.981602
feature_572	Inpp5d	0.039017	1.13163	0.683968	0.00150255	-3.08921	0.00805134	0.0238071	0.895396	0.63681
feature_2904	Ncoa5	0.0078034	-1.2085	0.683968	0.0270459	0.178897	1	0.0265391	0.242369	1
feature_3615	S100a16	0.0195085	1.47956	0.683968	0.00751275	-0.0892086	1	0.00819588	-0.473838	1
feature_3954	Psma5	0.0195085	1.47956	0.683968	0.00901529	0.187632	1	0.0078056	-0.666483	0.962076
feature_9573	Psma1	0.0195085	1.47956	0.683968	0.0030051	-1.24121	0.777234	0.00936672	0.170019	1
feature_11670	Zw10	0.0195085	1.47956	0.683968	0.00450765	-0.777265	0.960588	0.00897644	-0.0588001	1
feature_11873	Rab11a	0.0507221	0.902248	0.683968	0.0210357	-0.551552	0.85551	0.0308321	0.0407355	1
feature_12631	Vta1	0.0078034	-1.22499	0.683968	0.0240408	-0.0412742	1	0.0277099	0.44816	0.92309
feature_13462	Pawr	0.105346	-0.579337	0.683968	0.174296	0.182897	1	0.159234	0.0321944	1
feature_15219	Nt5c	0.0195085	1.47956	0.683968	0	-2.91928	0.104444	0.0101473	0.696087	0.92309
feature_17987	Ccar2	0.0195085	1.47956	0.683968	0.0060102	-0.40471	1	0.00858616	-0.272204	1
feature_18755	Tnrc6b	0.0975425	-0.583769	0.683968	0.15326	0.0807164	1	0.150648	0.122352	1
feature_20440	Stk19	0.0429187	1.00563	0.683968	0.0360612	0.770376	0.579803	0.019514	-0.971337	0.173043
feature_22015	Fam189a2	0.0195085	1.47956	0.683968	0.00150255	-1.87348	0.396374	0.009757	0.419247	1
feature_11903	Csnk1g1	0.0429187	-0.798978	0.684439	0.0841427	0.152055	1	0.0800074	0.1252	1
feature_17221	Cwc27	0.0195085	-0.975009	0.684439	0.0570969	0.520629	0.746886	0.0425405	-0.15191	1
feature_17418	Gng2	0.0195085	1.59059	0.684439	0	-2.82617	0.208095	0.00936672	0.585056	1
feature_20668	Ccnd3	0.0195085	-0.975009	0.684439	0.0405688	-0.0892086	1	0.0468336	0.400631	0.890853
feature_1328	Rab3gap2	0.0078034	-1.24129	0.684461	0.0360612	0.658483	0.738839	0.0249779	-0.206357	1
feature_1413	Gm32250	0	-1.74284	0.684461	0.0135229	0.35825	1	0.012489	0.248628	1
feature_3816	Slc22a15	0.0117051	-1.30471	0.684461	0.0435739	0.372897	1	0.0366863	0.0516238	1
feature_8197	Recql	0	-1.74284	0.684461	0.0120204	0.163179	1	0.0128792	0.4437	1
feature_9348	Rsf1os2	0	-1.74284	0.684461	0.0060102	-0.845283	0.85551	0.0144404	1.45216	0.29122
feature_9656	Scnn1b	0	-1.74284	0.684461	0.0180306	0.874265	0.804226	0.0113181	-0.267387	1
feature_10661	Zfp330	0	-1.74284	0.684461	0.0150255	0.540148	1	0.0120987	0.0667307	1
feature_11791	Gm17231	0	-1.74284	0.684461	0.0060102	-0.845283	0.85551	0.0144404	1.45216	0.29122
feature_19694	Robo2	0	-1.74284	0.684461	0.0135229	0.35825	1	0.012489	0.248628	1
feature_22132	Myof	0	-1.74284	0.684461	0.016528	0.711483	0.93345	0.0117084	-0.104604	1
feature_848	Klhl12	0	-1.77678	0.685679	0.00751275	-0.582249	1	0.0144404	1.18913	0.49882
feature_1075	Blzf1	0	-1.77678	0.685679	0.0135229	0.315182	1	0.0128792	0.291697	1
feature_2091	Gm13684	0	-1.77678	0.685679	0.0060102	-0.882758	0.85551	0.0148306	1.48964	0.297001
feature_4479	Stoml2	0.0078034	2.91252	0.685679	0.00150255	0.495754	1	0.00117084	-1.47384	0.92309
feature_5758	Agap3	0	-1.77678	0.685679	0.0150255	0.495754	1	0.012489	0.111125	1
feature_6022	Arap2	0.078034	-0.616412	0.685679	0.157768	0.491224	0.279537	0.116303	-0.227116	0.92309
feature_9322	Gm26944	0	-1.77678	0.685679	0.00751275	-0.582249	1	0.0144404	1.18913	0.49882
feature_14824	Ttll6	0	-1.77678	0.685679	0.0135229	0.315182	1	0.0128792	0.291697	1
feature_17305	Paip1	0.0039017	-1.45904	0.685679	0.0210357	0.180252	1	0.0210751	0.307522	1
feature_19280	Crkl	0	-1.77678	0.685679	0.016528	0.665679	0.937322	0.0120987	-0.0588001	1
feature_5849	Supt7l	0.0156068	1.80149	0.685793	0.00751275	0.578216	1	0.00468336	-1.09533	0.890853
feature_21096	Dsg3	0.0078034	2.91252	0.686815	0.00150255	0.495754	1	0.00117084	-1.47384	0.92309
feature_21151	Iws1	0.0156068	-1.01727	0.686815	0.0375637	0.0532356	1	0.0394183	0.291697	0.983189
feature_22847	Rpl36a	0.0234102	1.41244	0.686815	0.0195331	1.18763	0.512993	0.00741532	-1.47384	0.185033
feature_689	Pign	0.0195085	-0.994374	0.687495	0.0525892	0.343751	1	0.0444919	0.0141004	1
feature_2454	Sppl2a	0.078034	-0.627086	0.689302	0.0976657	-0.374735	0.738501	0.133086	0.51775	0.207225
feature_14293	Cox10	0.0156068	-1.02859	0.689317	0.0495841	0.538823	0.789737	0.0366863	-0.15191	1
feature_562	Gm28375	0	-1.80995	0.68975	0.0120204	0.0807164	1	0.0136598	0.526162	0.957949
feature_701	Serpinb5	0	-1.80995	0.68975	0.0240408	1.36082	0.189058	0.0105376	-0.753946	0.793367
feature_1583	Man1b1	0	-1.80995	0.68975	0.0255433	1.49575	0.0890477	0.0101473	-0.888875	0.624463
feature_2309	Spred1	0.0078034	-1.27335	0.68975	0.0195331	-0.433857	1	0.0300516	0.811565	0.513775
feature_2373	Snap23	0.0117051	-1.10541	0.68975	0.0345586	0.206247	1	0.0327835	0.180666	1
feature_10048	Camsap3	0.0234102	1.36937	0.68975	0.00901529	-0.199392	1	0.0105376	-0.366922	1
feature_14673	E230016K23Rik	0.0117051	-1.10541	0.68975	0.0270459	-0.210515	1	0.0347349	0.558584	0.728037
feature_20293	Gm50250	0	-1.80995	0.68975	0.00901529	-0.359856	1	0.0144404	0.966735	0.700713
feature_20332	Brd4	0.0468204	-0.721541	0.689942	0.0691173	-0.241212	1	0.0866422	0.444419	0.580532
feature_382	Idh1	0.0351153	1.16406	0.690987	0.0195331	0.187632	1	0.0163918	-0.571135	0.92309
feature_760	R3hdm1	0.0468204	-0.732227	0.690987	0.0736249	-0.145792	1	0.0862519	0.366382	0.739522
feature_1097	Rcsd1	0.0117051	2.19005	0.690987	0	-1.72664	0.85551	0.0039028	-0.014406	1
feature_1416	Cr1l	0.0117051	-1.13188	0.690987	0.0330561	0.0964837	1	0.0339544	0.285154	1
feature_2800	Rbl1	0.0078034	-1.28912	0.690987	0.030051	0.26358	1	0.0277099	0.172525	1
feature_3541	Gon4l	0.0117051	-1.13188	0.690987	0.0435739	0.59529	0.73178	0.0312224	-0.178382	1
feature_4024	Rwdd3	0.0117051	2.06452	0.690987	0.00150255	-0.726639	1	0.0039028	-0.336334	1
feature_6432	Iscu	0.0117051	2.06452	0.690987	0.0030051	-0.0347609	1	0.00351252	-0.736872	1
feature_6711	Sbds	0.0312136	1.14698	0.690987	0.0105178	-0.619723	0.94642	0.016782	-0.014406	1
feature_6912	Rnf216	0.0273119	-0.881899	0.690987	0.0570969	0.099332	1	0.0569809	0.202273	1
feature_8181	Pik3c2g	0.0078034	-1.28912	0.690987	0.0480816	1.17091	0.0464253	0.0230265	-0.69623	0.523112
feature_8591	4732471J01Rik	0.0975425	-0.601363	0.690987	0.133727	-0.178975	1	0.158063	0.346008	0.63681
feature_9792	Bckdk	0.0117051	2.06452	0.690987	0.0030051	-0.0347609	1	0.00351252	-0.736872	1
feature_12303	Apeh	0.0117051	2.06452	0.690987	0.00901529	1.71815	0.488603	0.0019514	-2.2108	0.130233
feature_14345	Per1	0.0117051	2.06452	0.690987	0.0060102	0.943213	1	0.00273196	-1.47384	0.63681
feature_14478	Ctns	0.0117051	2.06452	0.690987	0.00450765	0.495754	1	0.00312224	-1.11127	0.92309
feature_15757	Rps29	0.0663289	0.88867	0.690987	0.07663	1.32172	0.0105737	0.0273196	-1.43261	0.000858666
feature_17848	Zmym2	0.0351153	-0.816492	0.690987	0.0841427	0.470663	0.642082	0.0640059	-0.15191	1
feature_17980	Chmp7	0.0117051	2.06452	0.690987	0.0030051	-0.0347609	1	0.00351252	-0.736872	1
feature_19389	Eif4a2	0.0312136	-0.860073	0.690987	0.060102	0.00364014	1	0.0640059	0.277775	0.957949
feature_20023	Zfp947	0.0117051	2.06452	0.690987	0.0060102	0.943213	1	0.00273196	-1.47384	0.63681
feature_20095	Noxo1	0.0429187	1.0847	0.690987	0.0360612	0.866592	0.650062	0.0179529	-1.08917	0.240681
feature_21739	Ovol1	0.0117051	2.06452	0.690987	0.00450765	0.495754	1	0.00312224	-1.11127	0.92309
feature_21839	Gm41804	0.0117051	-1.13188	0.690987	0.0435739	0.59529	0.73178	0.0312224	-0.178382	1
feature_22292	Sh3pxd2a	0.0117051	-1.1187	0.690987	0.0330561	0.112425	1	0.0335641	0.268666	1
feature_14143	G3bp1	0.0546238	0.986517	0.692039	0.0360612	0.315182	1	0.0273196	-0.609493	0.726145
feature_3928	Strip1	0	-1.84237	0.69258	0.00901529	-0.397331	1	0.0148306	1.00421	0.634068
feature_7018	B3glct	0	-1.84237	0.69258	0.0240408	1.3102	0.205359	0.0109278	-0.703319	0.892817
feature_13558	Hmga2	0.0078034	-1.54692	0.69258	0.0435739	0.612568	0.85551	0.0312224	-0.133988	1
feature_19778	Gart	0	-1.84237	0.69258	0.0150255	0.410865	1	0.0132695	0.196014	1
feature_15235	Smim6	0.0234102	1.32755	0.692888	0.0120204	0.206247	1	0.0101473	-0.625841	0.92309
feature_12049	Phip	0.0468204	-0.742835	0.69309	0.0841427	0.0744026	1	0.0843005	0.179189	1
feature_22346	Nhlrc2	0.0546238	-0.738248	0.693136	0.0991682	0.113383	1	0.0963992	0.140509	1
feature_8268	Bicd1	0.0156068	-1.06201	0.693286	0.060102	0.868413	0.153223	0.0351252	-0.457896	0.782598
feature_16887	Gm49359	0.0195085	1.59059	0.694471	0.00150255	-1.77726	0.594364	0.00897644	0.30377	1
feature_11906	Snx1	0.0117051	-1.14493	0.695008	0.0405688	0.445128	0.900809	0.0323933	-0.0357165	1
feature_144	Cnnm4	0.078034	0.803395	0.695593	0.0435739	-0.16214	1	0.0472239	-0.186956	1
feature_12919	Mcu	0.214594	-0.465004	0.697376	0.270459	-0.142245	1	0.307931	0.269228	0.634068
feature_23032	Gm15261	0	-2.18341	0.700666	0.00751275	-1.03476	0.845045	0.0199043	1.64164	0.263937
feature_4209	Clca1	0.167773	-0.584573	0.70075	0.289992	0.275488	0.85551	0.247438	-0.0519681	1
feature_13339	Nr1h4	0.148265	0.542567	0.701232	0.0826402	-0.429341	0.648593	0.109278	0.106	1
feature_6846	Map11	0.0156068	1.72348	0.704611	0.00450765	-0.241212	1	0.0058542	-0.473838	1
feature_2890	Gm11457	0	-1.87408	0.705285	0.0120204	0.00271385	1	0.0144404	0.604165	0.92309
feature_11032	Bcar1	0	-1.87408	0.705285	0.0150255	0.370223	1	0.0136598	0.236656	1
feature_12061	Ttk	0	-1.87408	0.705285	0.0195331	0.843677	0.85551	0.012489	-0.236798	1
feature_7567	Gm20536	0.0039017	-1.87408	0.707519	0.0180306	-0.558694	1	0.0308321	1.04074	0.498492
feature_17089	Rasgrf2	0.0078034	-1.36547	0.708705	0.0180306	-0.661787	0.85551	0.0327835	1.02866	0.301048
feature_13960	Rars	0	-2.50027	0.71014	0.0285484	0.702205	0.856018	0.0199043	-0.095326	1
feature_667	St8sia4	0.0156068	1.80149	0.711833	0.00150255	-1.3116	0.888118	0.00624448	0.0286627	1
feature_994	Qsox1	0.0078034	-1.25741	0.711833	0.0390663	0.79121	0.528405	0.0245876	-0.331819	1
feature_7088	Phf14	0.0429187	-0.725557	0.711833	0.0661122	-0.182318	1	0.0796172	0.398288	0.693651
feature_7642	Zfp638	0.0429187	-0.725557	0.711833	0.0826402	0.208591	1	0.0753241	0.059986	1
feature_12269	Rassf1	0.0312136	1.11897	0.711833	0.0180306	0.196194	1	0.0152209	-0.544227	0.92309
feature_20373	2002-03-01	0.0312136	1.11897	0.711833	0.0135229	-0.269781	1	0.0163918	-0.217498	1
feature_10451	Palld	0.0429187	-0.73134	0.713315	0.117199	0.868797	0.0122379	0.0667379	-0.539426	0.276116
feature_13854	Ugp2	0.0429187	-0.73134	0.713315	0.0946606	0.45136	0.632906	0.0725921	-0.155762	1
feature_2055	Agps	0.0351153	-0.816492	0.714472	0.0856453	0.504069	0.567125	0.0636157	-0.182375	1
feature_20234	Rpl10a	0.0312136	1.2047	0.715546	0.0225382	0.688399	0.888118	0.0128792	-0.971337	0.463014
feature_13346	Apaf1	0.0663289	0.842127	0.716306	0.046579	0.273361	1	0.0366863	-0.518692	0.718556
feature_22664	Emd	0.0156068	1.72348	0.71811	0.0120204	1.34375	0.650062	0.0039028	-1.71485	0.221062
feature_8396	Rps5	0.0234102	1.36937	0.719509	0.0150255	0.633257	1	0.00897644	-0.976338	0.644077
feature_1639	Surf4	0.0273119	1.32755	0.721293	0.0210357	0.943213	0.642371	0.009757	-1.23283	0.197581
feature_3146	Ythdf3	0.0312136	-0.93548	0.721293	0.07663	0.346528	0.919952	0.0640059	-0.014406	1
[truncated: 21,087 more rows]
