# Supplementary material for: Pro-inflammatory secretome from intestinal epithelium recruits regulatory T cells for barrier defence
Source: Research Square preprint supplement (doi:10.21203/rs.3.rs-5431057/v1), 2025-05-12
Supplement: Supplementary file 4 [file aaee2c5ea496cb40c0a2dd54.xlsx]

## Sheet: Legend
Table 5: A. Secreted targets coded by NF-κB genes from Fig. 4g. B-D: Pathway analysis of NF-κB target genes identified from secretome analysis in A. using gene set library MSigDB Hallmark 2020. B. Wildtype (Wt) colitis. C. IκBα IEC KO untreated (Ut). D. IκBα IEC KO colitis.

## Sheet: A. Genes for MSigDB analysis
Secreted targets coded by NF-κB genes from the four conditions
Wt		IκBα IEC KO
Untreated	Colitis	Untreated	Colitis
col18a1	ccl5	ccl5	ccl5
ahsg	ccl2	ccl2	ccl22
reg3g	ccl22	ccl22	csf3
il28a	ccl21	CHI3L1	il1b
egf	cd160	cfd	il12
ldlr	CHI3L1	cxcl2	mmp9
pdgfbb	cfd	cxcl11	ager
ptx	cxcl2	fgf21	ccn4
	cxcl11	igfbp6	TNFRSF11B
	csf3	il12	infg
	fgf21	il22	Flt3l
	igfbp6	mmp9	areg
	igfbp5	ager	il1a
	il1b	POSTN	tnf
	il12	TNFRSF11B	il23
	il22	ccn4	reg3g
	lep	infg	csf1
	MMP9	csf1	selp
	ager	Flt3l	lcn2
	retn	lcn2	ccl2
	CCN4	areg	chn1
	POSTN	il1a	LIF
	TNFRSF11B	LIF	ccl20
	infg	cxcl11	gas6
	csf1	havcr1	gdf15
	Flt3l	tnf	dpp4
	lcn2	gas6	cd93
	il15	gdf15	igfbp3
	selp	dpp4	hgf
	RARRES2	cxcl13	il11
	ccl2	cxcl16	thpo
	chn1	CX3CL1	dkk1
	il1a	ccl3	ccl19
	lif	mpo	angpt1
	ccl20	pdecgf	cxcl10
	gdf15	thpo	angpt2
	dpp4	ccl19	il5
	cxcl13	ccl6	dlk1
	cd93	il7	il7
	cxcl16	AHSG	SERPINF1
	CX3CL1	reg3g	igfbp1
	igfbp3	ldlr	igfbp2
	lix	vcam1	ptx2
	il11	igfbp1	col18a1
	thpo	vegf
	il13	igfbp2
	tymp	cst3
	ANGPTL3
	dkk1
	il1ra
	ccl19
	cxcl10
	angpt1
	ccl17
	angpt2
	ccl6
	icam1
	il7
	opn
	cst3
	igfbp2
	rbp4
	vcam1
	vegf
	igfbp1
	F3
	ldlr
	pdgfbb
	ptx

## Sheet: B. MSigDB Wt - Colitis
Term	P-value	Adjusted P-value	Odds Ratio	Combined Score	Genes
Inflammatory Response	1.44217e-19	4.18228e-18	35.9727	1560.6	CSF3;CCL22;CSF1;IL15;CCL20;LIF;F3;CX3CL1;ICAM1;IL1A;CXCL10;CXCL11;IL1B;CCL5;CCL2;CCL17;LDLR
Allograft Rejection	4.84888e-15	7.03088e-14	27.5233	907.169	IL11;CCL22;CSF1;IL15;IL13;LIF;CXCL13;MMP9;ICAM1;IL7;IL1B;CCL5;CCL2;CCL19
TNF-alpha Signaling via NF-kB	1.30785e-13	1.26426e-12	24.9572	740.361	CSF1;CCL20;LIF;CXCL2;F3;ICAM1;IL1A;CXCL10;CXCL11;IL1B;CCL5;CCL2;LDLR
Interferon Gamma Response	2.47222e-08	1.79236e-07	15.7662	276.153	SELP;CXCL10;CXCL11;VCAM1;IL15;IL7;CCL5;CCL2;ICAM1
KRAS Signaling Up	3.84399e-07	2.22951e-06	13.7083	202.494	CXCL10;RBP4;CCL20;IGFBP3;IL1B;LIF;RETN;MMP9
IL-6/JAK/STAT3 Signaling	5.01604e-07	2.42442e-06	23.7168	344.024	CXCL10;CXCL11;CSF1;IL7;IL1B;CXCL13
Epithelial Mesenchymal Transition	5.20917e-06	2.15809e-05	11.7364	142.775	POSTN;VCAM1;IL15;IGFBP3;IGFBP2;TNFRSF11B;DKK1
Interferon Alpha Response	1.97959e-05	7.17601e-05	17.1153	185.359	CXCL10;CXCL11;CSF1;IL15;IL7
IL-2/STAT5 Signaling	5.89729e-05	0.000190024	9.89754	96.3865	SELP;CXCL10;CSF1;IL13;LIF;AGER
Apical Junction	0.000594961	0.00172539	8.03297	59.661	VCAM1;TNFRSF11B;MMP9;CX3CL1;ICAM1
Coagulation	0.00125541	0.00330971	9.23414	61.6868	CFD;DPP4;MMP9;F3
Apical Surface	0.00982772	0.0237503	14.3506	66.3366	CD160;CX3CL1
UV Response Dn	0.0130261	0.0290581	6.47823	28.1207	IGFBP5;F3;LDLR
UV Response Up	0.0166708	0.0338696	5.88893	24.1099	IGFBP2;CXCL2;ICAM1
Apoptosis	0.0175188	0.0338696	5.77624	23.3619	IL1A;IL1B;IGFBP6
Cholesterol Homeostasis	0.0262896	0.0445363	8.35859	30.4134	LDLR;CXCL16
Hypoxia	0.0307147	0.0445363	4.62358	16.104	IGFBP1;IGFBP3;F3
Adipogenesis	0.0307147	0.0445363	4.62358	16.104	ANGPT1;LEP;RETN
Complement	0.0307147	0.0445363	4.62358	16.104	DPP4;CCL5;F3
Xenobiotic Metabolism	0.0307147	0.0445363	4.62358	16.104	IGFBP1;RBP4;ANGPTL3
Unfolded Protein Response	0.0566311	0.0782049	5.41114	15.5364	IGFBP1;CCL2
Angiogenesis	0.115485	0.15223	8.48486	18.3155	POSTN
Pancreas Beta Cells	0.127476	0.159101	7.61309	15.6817	DPP4
Wnt-beta Catenin Signaling	0.133411	0.159101	7.24099	14.5857	DKK1
Myogenesis	0.148129	0.159101	3.0202	5.7676	CFD;IGFBP3
mTORC1 Signaling	0.148129	0.159101	3.0202	5.7676	IGFBP5;LDLR
p53 Pathway	0.148129	0.159101	3.0202	5.7676	IL1A;LIF
Glycolysis	0.495695	0.495695	1.48001	1.03866	IGFBP3
KRAS Signaling Dn	0.495695	0.495695	1.48001	1.03866	IGFBP2

## Sheet: C. MSigDB IκBα KO - Ut
Term	P-value	Adjusted P-value	Odds Ratio	Combined Score	Genes
TNF-alpha Signaling via NF-kB	2.37798e-11	3.44807e-10	28.8947	706.828	IL1A;CXCL11;CSF1;CCL5;LIF;CCL2;CXCL2;AREG;TNF;LDLR
Allograft Rejection	2.37798e-11	3.44807e-10	28.8947	706.828	CCL22;CSF1;IL7;CCL5;LIF;CCL2;CCL19;CXCL13;TNF;MMP9
Inflammatory Response	6.68022e-10	6.45755e-09	25.1687	531.731	IL1A;CXCL11;CCL22;CSF1;CCL5;LIF;CCL2;LDLR;CX3CL1
IL-6/JAK/STAT3 Signaling	1.65156e-06	1.19738e-05	29.5538	393.474	CXCL11;CSF1;IL7;CXCL13;TNF
Interferon Gamma Response	9.3444e-05	0.000451646	12.3571	114.651	CXCL11;VCAM1;IL7;CCL5;CCL2
Epithelial Mesenchymal Transition	9.3444e-05	0.000451646	12.3571	114.651	POSTN;VCAM1;IGFBP2;TNFRSF11B;AREG
Apical Junction	0.00114018	0.0047236	9.60058	65.059	VCAM1;TNFRSF11B;MMP9;CX3CL1
Interferon Alpha Response	0.0014432	0.00523159	14.7402	96.4143	CXCL11;CSF1;IL7
Coagulation	0.0039282	0.0126575	10.2424	56.7384	CFD;DPP4;MMP9
Apoptosis	0.00603178	0.0174922	8.74124	44.674	IL1A;IGFBP6;TNF
IL-2/STAT5 Signaling	0.0107595	0.0283661	7.03299	31.8732	CSF1;LIF;AGER
Cholesterol Homeostasis	0.0125833	0.0304096	12.5518	54.9188	LDLR;CXCL16
Unfolded Protein Response	0.0278621	0.062154	8.12572	29.094	IGFBP1;CCL2
UV Response Up	0.0511879	0.106032	5.76865	17.1459	IGFBP2;CXCL2
Complement	0.0773472	0.128275	4.53535	11.608	DPP4;CCL5
p53 Pathway	0.0773472	0.128275	4.53535	11.608	IL1A;LIF
KRAS Signaling Up	0.0773472	0.128275	4.53535	11.608	LIF;MMP9
Angiogenesis	0.0796192	0.128275	12.647	32.0032	POSTN
Pancreas Beta Cells	0.0880733	0.134428	11.3476	27.5699	DPP4
Apical Surface	0.0964514	0.139855	10.2899	24.0652	CX3CL1
Reactive Oxygen Species Pathway	0.106818	0.147511	9.21574	20.6122	MPO
UV Response Dn	0.283067	0.370505	3.07863	3.88545	LDLR
Hypoxia	0.370505	0.370505	2.20603	2.19034	IGFBP1
Estrogen Response Early	0.370505	0.370505	2.20603	2.19034	AREG
Estrogen Response Late	0.370505	0.370505	2.20603	2.19034	AREG
Myogenesis	0.370505	0.370505	2.20603	2.19034	CFD
mTORC1 Signaling	0.370505	0.370505	2.20603	2.19034	LDLR
Xenobiotic Metabolism	0.370505	0.370505	2.20603	2.19034	IGFBP1
KRAS Signaling Dn	0.370505	0.370505	2.20603	2.19034	IGFBP2

## Sheet: D. MSigDB IκBα KO - Colitis
Term	P-value	Adjusted P-value	Odds Ratio	Combined Score	Genes
TNF-alpha Signaling via NF-kB	3.79865e-07	1.89932e-06	46.1282	681.934	IL1A;CCL5;IL1B;AREG;TNF
Allograft Rejection	3.79865e-07	1.89932e-06	46.1282	681.934	CCL22;CCL5;IL1B;MMP9;TNF
Inflammatory Response	3.79865e-07	1.89932e-06	46.1282	681.934	IL1A;CSF3;CCL22;CCL5;IL1B
Apoptosis	0.000265466	0.000995496	28.9572	238.434	IL1A;IL1B;TNF
IL-6/JAK/STAT3 Signaling	0.00215742	0.00647227	33.4437	205.306	IL1B;TNF
KRAS Signaling Up	0.0108884	0.0204158	14.2756	64.5266	IL1B;MMP9
Apical Junction	0.0108884	0.0204158	14.2756	64.5266	TNFRSF11B;MMP9
Epithelial Mesenchymal Transition	0.0108884	0.0204158	14.2756	64.5266	TNFRSF11B;AREG
Coagulation	0.104904	0.148593	9.65791	21.7758	MMP9
IL-2/STAT5 Signaling	0.147905	0.148593	6.66195	12.7322	AGER
p53 Pathway	0.148593	0.148593	6.62814	12.6368	IL1A
Estrogen Response Early	0.148593	0.148593	6.62814	12.6368	AREG
Estrogen Response Late	0.148593	0.148593	6.62814	12.6368	AREG
Interferon Gamma Response	0.148593	0.148593	6.62814	12.6368	CCL5
Complement	0.148593	0.148593	6.62814	12.6368	CCL5
