# Supplementary material for: Pro-inflammatory secretome from intestinal epithelium recruits regulatory T cells for barrier defence
Source: Research Square preprint supplement (doi:10.21203/rs.3.rs-5431057/v1), 2025-05-12
Supplement: Supplementary file 5 [file c17b5339b5f5120aab488603.xlsx]

## Sheet: Legend
Table 2: A. NF-κB target genes showing significant increase in expression in intestinal epithelial cells (Cdh1+), immune (Ptprc+) or stromal (Acta2+) cells. All three tissues compared. Right column: overlapping genes across three tissues.

## Sheet: A. NF-κB_IEC Immune Stromal
Epithelial cells	Immune cells	Stromal cells			Overlapping genes
Ccl2	Cr2	Col1a2			C3
Gstp1	Btk	Bmp4			Ccl2
Ccl4	Aicda	Prkd1			Cebpd
Spi1	Cd40	Tnc			Cr2
Ccl5	Map4k1	Cyp7b1			Elf3
Fth1	march1	Hgf			Hgf
Mt3	Lta	Bgn			Muc2
Fabp6	Cd86	Igfbp3			Pglyrp1
Lcn2	Irf4	Csf1			Saa1
Irf7	Ltb	Vegfc			Vim
C3	Cd48	Ar
Pglyrp1	Cd2	Cxcl12
Upp1	Ighg1	Nrg1
S100a6	Abca1	C3
Cxcl2	Lyn	Angpt1
Irf4	Rel	Gucy1a2
Vim	Cd80	Fn1
Psme2	Spi1	Cav1
Cd40	Pim1	Cr2
Pycard	Nfkbie	Ptgs2
Cfb	Ptpn1	Vcam1
Bmp4	St6gal1	Wt1
Npy1r	Il16	Tnfaip2
Ctsl	Traf1	Upk1b
Klf10	Apoe	Ptgis
Ccr5	Oprm1	Vim
Slfn2	Tap1	Inhba
S100a10	Saa1	Eno2
Pim1	Slfn2	Serpine2
Lamb2	Ltf	Snai1
Bax	Blnk	Abca1
Ltb	Cd274	Eng
Lgals3	Mylk	Il11
Cd274	Gcnt1	Saa3
Ticam1	S100a6	Pthlh
Nfkbia	Pde7a	Plau
Map4k1	Pglyrp1	Ptges
Gadd45b	Col1a2	Madcam1
Ier2	Hmgn1	Tnfsf13b
Cxcl9	Psmb9	Thbs2
Cebpd	Vim	Lef1
Ctsb	Cyp7b1	Tacr1
Sat1	Abcb4	Bmp2
Psmb9	Tlr9	Trpc1
Dnase1l2	Igfbp3	Mmp3
Junb	F11r	Adora1
Tff3	Elf3	Cxcl1
Ucp2	Dio1	Nos1
Btk	Fas	Il16
Psme1	Gadd45b	Agt
Tapbp	Muc2	Serpine1
Ass1	Fos	Hpse
Gnai2	Xdh	Xdh
Cldn2	Cd40lg	Fas
Ier3	Ccr7	Mthfr
Nfkb2	Tnfaip2	Cyp2e1
Plk3	Irf7	Spp1
Elf3	Lgals3	Cebpd
Apoe	Fth1	Mylk
Hsp90aa1	Lef1	Elf3
Pgk1	Il18	ccl2
Relb	Il6	Hsd11b2
Sox9	Hgf	Saa1
Ccnd2	Hoxa9	Pglyrp1
Ifi44l	Aqp4	Kcnn2
Nuak2	Ccl28	Ptafr
Bcl3	Ccnd2	Muc2
Fos	Erbb2	Cd86
Pdgfb	Il10	Egr1
Hgf	Vcam1	Ccl28
Lbp	Hpse	Tnip3
Adora1	Ier3	Nox1
Brca2	Ifi44l	Ccl19
Muc2	Il2ra	Penk
Lyn	Cebpd	Grin2a
Saa1	Skp2	Bnip3
Nox1	Cd3g	Lamb2
Tifa	Slc16a1	Igfbp2
Cdk6	Pdgfb	Twist1
Cxcl5	Ctsb
Ccl22	Gjb1
Nos1	F3
Bdnf	Ptafr
Pax8	Ccl4
Cr2	Pik3ca
Pde7a	Sat1
Il2ra	Ccr5
Trpc1	Ar
Gucy1a2	Gata3
Cd44	Ptges
Egr1	Il1a
Il15	Bnip3
Egfr	Sod1
Vegfc	Tnfsf13b
Sh3bgrl	Serpine1
Dpyd	C3
Tfpi2	Il1b
Tgm1	Ccl2
Saa3	Plau
Pgr	Alox5
	Il27
	Hmox1
	St8sia1
	Ccl3
	Ccl5
	Tfec
	Tgm1
	Eng
