# Supplementary material for: Pro-inflammatory secretome from intestinal epithelium recruits regulatory T cells for barrier defence
Source: Research Square preprint supplement (doi:10.21203/rs.3.rs-5431057/v1), 2025-05-12
Supplement: Supplementary file 6 [file c35696e4210257220f41d161.xlsx]

## Sheet: Legend
Table 6: A-B. Gene Ontology (GO) terms from DAVID analysis BP_DIRECT from Fig. 6h. A. GO terms enriched in medium of healthy colonoids treated with TNF. B. GO terms enriched in medium of UC colonoids treated with TNF. C. REVIGO (from DAVID GO terms). GO terms used for Fig. 6i.

## Sheet: A. UP in TNF healthy
Category	Term	Count	%	P-value	Genes	List Total	Pop Hits	Pop Total	Fold Enrichment	Bonferroni	Benjamini	FDR
GOTERM_BP_DIRECT GO 6955	immune response	8	44.4444	1.07366e-07	CXCL12, CXCL8, CSF2, IL15, CCL20, PECAM1, TNF, IL2	18	505	19734	17.3677	5.293e-05	5.29314e-05	5.08915e-05
GOTERM_BP_DIRECT GO 71222	cellular response to lipopolysaccharide	6	33.3333	4.53815e-07	CXCL11, CXCL8, CSF2, CD14, TNF, HAVCR2	18	191	19734	34.4398	0.000223706	0.000111865	0.000107554
GOTERM_BP_DIRECT GO 6954	inflammatory response	7	38.8889	9.35417e-07	CXCL11, CXCL8, CCL20, CD14, MIF, TNF, HAVCR2	18	422	19734	18.1856	0.000461055	0.00015372	0.000147796
GOTERM_BP_DIRECT GO 6935	chemotaxis	5	27.7778	3.009e-06	CXCL11, CXCL12, CXCL8, CCL20, PLAUR	18	121	19734	45.303	0.00148234	0.000370859	0.000356566
GOTERM_BP_DIRECT GO 42531	positive regulation of tyrosine phosphorylation of STAT protein	4	22.2222	2.45847e-05	CSF2, IL15, TNF, IL2	18	67	19734	65.4527	0.0120472	0.00197535	0.00189922
GOTERM_BP_DIRECT GO 1819	positive regulation of cytokine production	4	22.2222	2.57056e-05	IL15, CD14, MIF, TNF	18	68	19734	64.4902	0.0125931	0.00197535	0.00189922
GOTERM_BP_DIRECT GO 70098	chemokine-mediated signaling pathway	4	22.2222	2.80475e-05	CXCL11, CXCL12, CXCL8, CCL20	18	70	19734	62.6476	0.0137325	0.00197535	0.00189922
GOTERM_BP_DIRECT GO 32729	positive regulation of type II interferon production	4	22.2222	3.88139e-05	CD14, TNF, IL2, HAVCR2	18	78	19734	56.2222	0.0189537	0.00208458	0.00200424
GOTERM_BP_DIRECT GO 7267	cell-cell signaling	5	27.7778	4.06194e-05	CXCL11, IL15, CCL20, GDF15, IL2	18	234	19734	23.4259	0.0198266	0.00208458	0.00200424
GOTERM_BP_DIRECT GO 7165	signal transduction	8	44.4444	4.22836e-05	CXCL11, CXCL12, CXCL8, IL15, CCL20, GDF15, PLAUR, PECAM1	18	1240	19734	7.07312	0.0206305	0.00208458	0.00200424
GOTERM_BP_DIRECT GO 61844	antimicrobial humoral immune response mediated by antimicrobial peptide	4	22.2222	0.000105354	CXCL11, CXCL8, CCL20, ANG	18	109	19734	40.2324	0.0506165	0.0047218	0.00453982
GOTERM_BP_DIRECT GO 70374	positive regulation of ERK1 and ERK2 cascade	4	22.2222	0.000918245	CCL20, MIF, TNF, HAVCR2	18	228	19734	19.2339	0.36422	0.036651	0.0352385
GOTERM_BP_DIRECT GO 45087	innate immune response	5	27.7778	0.000966457	LCN2, ANG, CD14, MIF, HAVCR2	18	536	19734	10.227	0.379167	0.036651	0.0352385
GOTERM_BP_DIRECT GO 30335	positive regulation of cell migration	4	22.2222	0.00177963	CXCL12, CSF2, CCL20, PECAM1	18	287	19734	15.2799	0.584444	0.0626683	0.0602531
GOTERM_BP_DIRECT GO 10629	negative regulation of gene expression	4	22.2222	0.00221709	CXCL8, MIF, TNF, HAVCR2	18	310	19734	14.1462	0.665206	0.0677411	0.0651304
GOTERM_BP_DIRECT GO 30593	neutrophil chemotaxis	3	16.6667	0.00228144	CXCL11, CXCL8, CCL20	18	83	19734	39.6265	0.675683	0.0677411	0.0651304
GOTERM_BP_DIRECT GO 50731	positive regulation of peptidyl-tyrosine phosphorylation	3	16.6667	0.0023359	IL15, PECAM1, MIF	18	84	19734	39.1548	0.684295	0.0677411	0.0651304
GOTERM_BP_DIRECT GO 45471	response to ethanol	3	16.6667	0.00382502	CD14, TNF, IL2	18	108	19734	30.4537	0.84883	0.101229	0.0973279
GOTERM_BP_DIRECT GO 50729	positive regulation of inflammatory response	3	16.6667	0.00396466	IL15, TNF, IL2	18	110	19734	29.9	0.858925	0.101229	0.0973279
GOTERM_BP_DIRECT GO 32760	positive regulation of tumor necrosis factor production	3	16.6667	0.00410666	CD14, MIF, HAVCR2	18	112	19734	29.3661	0.868501	0.101229	0.0973279
GOTERM_BP_DIRECT GO 19722	calcium-mediated signaling	3	16.6667	0.00485175	CXCL8, CCL20, TNF	18	122	19734	26.959	0.909076	0.113901	0.109511
GOTERM_BP_DIRECT GO 34105	positive regulation of tissue remodeling	2	11.1111	0.00515828	IL15, IL2	18	6	19734	365.444	0.921888	0.115592	0.111137
GOTERM_BP_DIRECT GO 50830	defense response to Gram-positive bacterium	3	16.6667	0.00557177	ANG, TNF, HAVCR2	18	131	19734	25.1069	0.936363	0.11943	0.114827
GOTERM_BP_DIRECT GO 2719	negative regulation of cytokine production involved in immune response	2	11.1111	0.00601555	APOA1, TNF	18	7	19734	313.238	0.948933	0.123569	0.118807
GOTERM_BP_DIRECT GO 71803	positive regulation of podosome assembly	2	11.1111	0.00858321	CSF2, TNF	18	10	19734	219.267	0.985733	0.15433	0.148382
GOTERM_BP_DIRECT GO 31666	positive regulation of lipopolysaccharide-mediated signaling pathway	2	11.1111	0.00858321	CD14, MIF	18	10	19734	219.267	0.985733	0.15433	0.148382
GOTERM_BP_DIRECT GO 8284	positive regulation of cell population proliferation	4	22.2222	0.00871795	CSF2, IL15, MIF, IL2	18	506	19734	8.66667	0.986657	0.15433	0.148382
GOTERM_BP_DIRECT GO 43066	negative regulation of apoptotic process	4	22.2222	0.00876517	PLAUR, MIF, TNF, IL2	18	507	19734	8.64957	0.986967	0.15433	0.148382
GOTERM_BP_DIRECT GO 2000343	positive regulation of chemokine (C-X-C motif) ligand	2	11.1111	0.0094377	MIF, TNF	18	11	19734	199.333	0.990673	0.160441	0.154258
GOTERM_BP_DIRECT GO 1666	response to hypoxia	3	16.6667	0.00995813	CXCL12, ANG, TNF	18	177	19734	18.5819	0.992802	0.163645	0.157339
GOTERM_BP_DIRECT GO 34138	toll-like receptor	2	11.1111	0.0111446	TNF, HAVCR2	18	13	19734	168.667	0.996015	0.177235	0.170405
GOTERM_BP_DIRECT GO 60354	negative regulation of cell adhesion molecule production	2	11.1111	0.011997	CXCL8, APOA1	18	14	19734	156.619	0.997395	0.180984	0.174009
GOTERM_BP_DIRECT GO 50930	induction of positive chemotaxis	2	11.1111	0.0128488	CXCL12, CXCL8	18	15	19734	146.178	0.998297	0.180984	0.174009
GOTERM_BP_DIRECT GO 50966	detection of mechanical stimulus involved in sensory perception of pain	2	11.1111	0.0128488	CXCL12, TNF	18	15	19734	146.178	0.998297	0.180984	0.174009
GOTERM_BP_DIRECT GO 2281	macrophage activation involved in immune response	2	11.1111	0.0128488	TNF, HAVCR2	18	15	19734	146.178	0.998297	0.180984	0.174009
GOTERM_BP_DIRECT GO 1934	positive regulation of protein phosphorylation	3	16.6667	0.0133033	PLAUR, PECAM1, TNF	18	206	19734	15.966	0.998643	0.182182	0.175161
GOTERM_BP_DIRECT GO 48566	embryonic digestive tract development	2	11.1111	0.0136998	CXCL8, TNF	18	16	19734	137.042	0.998887	0.182541	0.175505
GOTERM_BP_DIRECT GO 42119	neutrophil activation	2	11.1111	0.0153998	CXCL8, IL15	18	18	19734	121.815	0.999525	0.199792	0.192092
GOTERM_BP_DIRECT GO 2000406	positive regulation of T cell migration	2	11.1111	0.017097	CXCL12, CCL20	18	20	19734	109.633	0.999797	0.216124	0.207795
GOTERM_BP_DIRECT GO 42327	positive regulation of phosphorylation	2	11.1111	0.0213281	ANG, MIF	18	25	19734	87.7067	0.999976	0.262869	0.252738
GOTERM_BP_DIRECT GO 32740	positive regulation of interleukin-17 production	2	11.1111	0.0230157	IL15, IL2	18	27	19734	81.2099	0.99999	0.27675	0.266084
GOTERM_BP_DIRECT GO 30225	macrophage differentiation	2	11.1111	0.0280622	CSF2, IL15	18	33	19734	66.4444	0.999999	0.329396	0.316702
GOTERM_BP_DIRECT GO 7166	cell surface receptor signaling pathway	3	16.6667	0.0305392	PECAM1, CD14, MIF	18	321	19734	10.2461	1	0.350136	0.336642
GOTERM_BP_DIRECT GO 2001240	negative regulation of extrinsic apoptotic signaling pathway in absence of ligand	2	11.1111	0.0314128	CSF2, TNF	18	37	19734	59.2613	1	0.351966	0.338402
GOTERM_BP_DIRECT GO 32722	positive regulation of chemokine production	2	11.1111	0.0364184	TNF, HAVCR2	18	43	19734	50.9922	1	0.398984	0.383608
GOTERM_BP_DIRECT GO 30890	positive regulation of B cell proliferation	2	11.1111	0.0389121	MIF, IL2	18	46	19734	47.6667	1	0.417036	0.400964
GOTERM_BP_DIRECT GO 7186	G protein-coupled receptor signaling pathway	4	22.2222	0.0448266	CXCL12, CXCL8, CCL20, APOA1	18	943	19734	4.65041	1	0.470203	0.452081
GOTERM_BP_DIRECT GO 50766	positive regulation of phagocytosis	2	11.1111	0.0463567	IL15, APOA1	18	55	19734	39.8667	1	0.476122	0.457772
GOTERM_BP_DIRECT GO 30155	regulation of cell adhesion	2	11.1111	0.049648	CXCL8, PLAUR	18	59	19734	37.1638	1	0.495799	0.476691
GOTERM_BP_DIRECT GO 45785	positive regulation of cell adhesion	2	11.1111	0.0504691	CXCL12, TNF	18	60	19734	36.5444	1	0.495799	0.476691
GOTERM_BP_DIRECT GO 42102	positive regulation of T cell proliferation	2	11.1111	0.0512896	IL15, HAVCR2	18	61	19734	35.9454	1	0.495799	0.476691
GOTERM_BP_DIRECT GO 32757	positive regulation of interleukin-8 production	2	11.1111	0.053747	CD14, TNF	18	64	19734	34.2604	1	0.509563	0.489925
GOTERM_BP_DIRECT GO 1901224	positive regulation of non-canonical NF-kappaB signal transduction	2	11.1111	0.0561984	TNF, HAVCR2	18	67	19734	32.7264	1	0.520519	0.500458
GOTERM_BP_DIRECT GO 32715	negative regulation of interleukin-6 production	2	11.1111	0.0570142	TNF, HAVCR2	18	68	19734	32.2451	1	0.520519	0.500458
GOTERM_BP_DIRECT GO 6909	phagocytosis	2	11.1111	0.0594577	PECAM1, CD14	18	71	19734	30.8826	1	0.528318	0.507956
GOTERM_BP_DIRECT GO 1938	positive regulation of endothelial cell proliferation	2	11.1111	0.0602709	CXCL12, ANG	18	72	19734	30.4537	1	0.528318	0.507956
GOTERM_BP_DIRECT GO 33138	positive regulation of peptidyl-serine phosphorylation	2	11.1111	0.0610834	MIF, TNF	18	73	19734	30.0365	1	0.528318	0.507956
GOTERM_BP_DIRECT GO 71347	cellular response to interleukin-1	2	11.1111	0.0667524	CXCL8, CCL20	18	80	19734	27.4083	1	0.567395	0.545528
GOTERM_BP_DIRECT GO 10628	positive regulation of gene expression	3	16.6667	0.0699655	CXCL8, CSF2, TNF	18	509	19734	6.46169	1	0.584627	0.562096
GOTERM_BP_DIRECT GO 60326	cell chemotaxis	2	11.1111	0.0747951	CXCL12, CCL20	18	90	19734	24.363	1	0.614567	0.590882
GOTERM_BP_DIRECT GO 71346	cellular response to type II interferon	2	11.1111	0.0851532	CCL20, TNF	18	103	19734	21.288	1	0.688205	0.661682
GOTERM_BP_DIRECT GO 9615	response to virus	2	11.1111	0.0906853	CXCL12, TNF	18	110	19734	19.9333	1	0.721094	0.693304

## Sheet:  B. UP in TNF UC
Category	Term	Count	%	P-value	Genes	List Total	Pop Hits	Pop Total	Fold Enrichment	Bonferroni	Benjamini	FDR
GOTERM_BP_DIRECT GO 150076	neuroinflammatory response	2	66.6667	0.000709328	IL4, IFNG	3	7	19734	1879.43	0.0848776	0.0569967	0.0569967
GOTERM_BP_DIRECT GO 1901857	positive regulation of cellular respiration	2	66.6667	0.000911946	IL4, IFNG	3	9	19734	1461.78	0.107782	0.0569967	0.0569967
GOTERM_BP_DIRECT GO 45348	positive regulation of MHC class II biosynthetic process	2	66.6667	0.0014184	IL4, IFNG	3	14	19734	939.714	0.162577	0.0591002	0.0591002
GOTERM_BP_DIRECT GO 1774	microglial cell activation	2	66.6667	0.002937	IL4, IFNG	3	29	19734	453.655	0.307651	0.0917814	0.0917814
GOTERM_BP_DIRECT GO 2001237	negative regulation of extrinsic apoptotic signaling pathway	2	66.6667	0.00394876	IL4, IL19	3	39	19734	337.333	0.390168	0.0987191	0.0987191
GOTERM_BP_DIRECT GO 42531	positive regulation of tyrosine phosphorylation of STAT protein	2	66.6667	0.00677896	IL4, IFNG	3	67	19734	196.358	0.572694	0.141228	0.141228
GOTERM_BP_DIRECT GO 6955	immune response	2	66.6667	0.0505271	IL4, IL19	3	505	19734	26.0515	0.998468	0.672702	0.672702
GOTERM_BP_DIRECT GO 8284	positive regulation of cell population proliferation	2	66.6667	0.0506259	IL4, IFNG	3	506	19734	26	0.998488	0.672702	0.672702
GOTERM_BP_DIRECT GO 10628	positive regulation of gene expression	2	66.6667	0.0509221	IL4, IFNG	3	509	19734	25.8468	0.998545	0.672702	0.672702
GOTERM_BP_DIRECT GO 45892	negative regulation of DNA-templated transcription	2	66.6667	0.0572307	IL4, IFNG	3	573	19734	22.9599	0.999368	0.672702	0.672702
GOTERM_BP_DIRECT GO 6915	apoptotic process	2	66.6667	0.0591978	IFNG, IL19	3	593	19734	22.1855	0.999513	0.672702	0.672702
GOTERM_BP_DIRECT GO 122	negative regulation of transcription by RNA polymerase II	2	66.6667	0.0952191	IL4, IFNG	3	963	19734	13.6615	0.999996	0.991865	0.991865

## Sheet: C. REVIGO results
TermID	Name	Value	LogSize	Frequency	Uniqueness	Dispensability	PC_0	PC_1	Representative
GO:0001666	response to hypoxia	1	4.32338	0.0580068	0.833655	0.508365	-5.21944	-2.24081	null
GO:0001934	positive regulation of protein phosphorylation	1	4.59025	0.107242	0.53619	0.640633	4.5832	-3.11742	null
GO:0006909	phagocytosis	1	4.36842	0.0643461	0.994695	0.0135	-2.87178	5.05351	null
GO:0006954	inflammatory response	1	4.7289	0.147575	0.795954	0.534467	-5.24033	-3.19698	null
GO:0006955	immune response	1	5.3233	0.579991	0.746434	0.251519	-4.36586	-4.08219	null
GO:0007165	signal transduction	1	6.5063	8.83948	0.57757	0.66173	-0.574131	-3.12069	null
GO:0007166	cell surface receptor signaling pathway	1	5.74053	1.51584	0.630834	0.529708	-0.999686	-3.35403	null
GO:0007186	G protein-coupled receptor signaling pathway	1	5.75292	1.5597	0.630056	0.459593	-0.950885	-2.97147	null
GO:0007267	cell-cell signaling	1	5.2482	0.487886	0.7703	0.358787	1.46803	0.292026	null
GO:0008284	positive regulation of cell population proliferation	1	4.79575	0.172133	0.566194	0.588552	4.03895	-3.85269	null
GO:0009615	response to virus	1	4.78326	0.167254	0.765486	0.63844	-4.83661	-4.95578	null
GO:0010628	positive regulation of gene expression	1	5.19549	0.432124	0.530742	0.548622	4.25931	-3.05646	null
GO:0019722	calcium-mediated signaling	1	4.59574	0.108605	0.689221	0.187174	-1.54415	-2.44055	null
GO:0030155	regulation of cell adhesion	1	4.71647	0.143412	0.810825	0.143852	2.48762	1.90269	null
GO:0030225	macrophage differentiation	1	3.18498	0.00421517	0.985614	0.343516	0.257535	5.67626	null
GO:0031666	positive regulation of LPS pathway	1	2.98945	0.00268614	0.616825	0.6622	4.59886	-4.94551	null
GO:0032715	negative regulation of interleukin-6 production	1	3.22866	0.00466148	0.635685	0.648118	5.31597	1.39537	null
GO:0032740	positive regulation of interleukin-17 production	1	2.89927	0.00218197	0.563607	0.504095	5.5468	-3.07176	null
GO:0034105	positive regulation of tissue remodeling	1	2.10721	0.000349887	0.642273	0.275358	5.60217	-5.63651	null
GO:0034138	toll-like receptor 3 signaling pathway	1	2.73799	0.00150424	0.471405	0.643797	1.10078	-4.34801	null
GO:0045471	response to ethanol	1	3.30535	0.00556237	0.847084	0.544216	-3.81197	-7.25424	null
GO:0045785	positive regulation of cell adhesion	1	4.42249	0.0728784	0.596358	0.388345	3.97246	-4.47419	null
GO:0048566	embryonic digestive tract development	1	3.12254	0.00365039	0.952839	0	-4.27165	3.60295	null
GO:0050766	positive regulation of phagocytosis	1	3.49693	0.00864799	0.641308	0.555896	4.0301	-5.84565	null
GO:0050930	induction of positive chemotaxis	1	3.32181	0.00577727	0.604763	0.517714	4.47213	-5.22106	null
GO:2000406	positive regulation of T cell migration	1	3.34537	0.0060996	0.606656	0.820807	0	0	50930
GO:0050966	detection of mechanical stimulus involved in sensory perception of pain	1	2.58771	0.00106344	0.795366	0.419584	-5.27299	-0.786679	null
GO:0060354	negative regulation of cell adhesion molecule production	1	2.27416	0.000515188	0.814668	0.311861	3.99861	3.93338	null
GO:0061844	antimicrobial humoral immune response	1	3.5731	0.0103065	0.723378	0.672474	-5.06978	-3.65496	null
GO:0070374	positive regulation of ERK1 and ERK2 cascade	1	4.15152	0.0390496	0.577219	0.668225	4.47819	-3.74538	null
GO:0071222	cellular response to lipopolysaccharide	1	4.03671	0.0299773	0.758066	0.355547	-4.44443	-5.67123	null
GO:0071346	cellular response to type II interferon	1	3.43457	0.00749088	0.698866	0.657826	-4.913	-4.43219	null
GO:0071347	cellular response to interleukin-1	1	3.53555	0.00945246	0.830184	0.155614	-4.1651	-6.81085	null
GO:0071803	positive regulation of podosome assembly	1	2.56467	0.00100834	0.67511	0.305772	4.17187	-6.52808	null
GO:1901224	positive regulation of non-canonical NF-kB	1	3.40295	0.00696468	0.611407	0.471988	4.67238	-4.36288	null
GO:0001774	microglial cell activation	2	2.94399	0.0024189	0.747236	0.628329	-5.14495	-1.63774	null
GO:0006915	apoptotic process	2	5.11098	0.355714	0.994002	0	-1.04467	5.60816	null
GO:0045348	positive regulation of MHC class II biosyn.	2	2.92531	0.00231697	0.642579	0.359318	5.5575	-3.75774	null
GO:0045892	negative regulation of DNA-templated transcription	2	5.63688	1.19401	0.664711	0.497506	4.21066	0.185718	null
GO:0150076	neuroinflammatory response	2	3.17869	0.00415456	0.827733	0	-5.86496	-2.74401	null
GO:1901857	positive regulation of cellular respiration	2	2.68574	0.00133343	0.653367	0.109889	5.60662	-4.42422	null
GO:2001237	negative regulation of extrinsic apoptotic signaling pathway	2	3.83008	0.0186267	0.70329	0	4.45487	0.815302	null
