# Supplementary material for: Pro-inflammatory secretome from intestinal epithelium recruits regulatory T cells for barrier defence
Source: Research Square preprint supplement (doi:10.21203/rs.3.rs-5431057/v1), 2025-05-12
Supplement: Supplementary file 7 [file d8800d6b9fd818424fc4fb3a.xlsx]

## Sheet: Legend
Table 8: A. Primer sequences for genotyping murine DNA. B. Primer sequences used for Real-Time quantitative PCR (RT-qPCR). C. Antibodies used for immunofluorescence staining. D. Antibodies and dyes used for flow cytometry.

## Sheet: A. Primers for genotyping
Primer	Sequence
LoxP	forward 5'-3'	CGAGTCCCCGTCCTCGGTG
	reverse 5'-3'	AGAATCACGGTGACCAGGGTTAAA
GFP	forward 5'-3'	ACGTAAACGGCCACAAGTTC
	reverse 5'-3'	TGCTCAGGTAGTGGTTGTCG
IκBα fl/fl	forward 5'-3'	GTGGAGTCAGATGTAGCACG
	reverse 5'-3'	AGAAAGGGATAAGCCATGGAG
VillinCre	forward 5'-3'	CAAGCCTGGCTCGACGGCC
	reverse 5'-3'	CGCGAACATCTTCAGGTTCT

## Sheet: B. Primers for RT-qPCR
Primer	Sequence
EGFP	forward 5'-3'	AGCTGACCCTGAAGTTCATCTG
	reverse 5'-3'	AAGTCGTGCTGCTTCATGTG
Lgr5	forward 5'-3'	CCTACTCGAAGACTTACCCAGT
	reverse 5'-3'	GCATTGGGGTGAATGATAGCA
Chga	forward 5'-3'	TCCCCACTGCAGCATCCAGTTC
	reverse 5'-3'	CCTTCAGACGGCAGAGCTTCGG
Muc2	forward 5'-3'	TGTGATGCCAATGACAAGGTGTCC
	reverse 5'-3'	ACCACAATGTTGATGCCAGACTCG
Dclk1	forward 5'-3'	CAGATCTTGATGGGCCAAGT
	reverse 5'-3'	CATCATTAACCCAGGGATGC
Tnf	forward 5'-3'	TCCCAAATGGCCTCCCTCTCC
	reverse 5'-3'	CCACTTGGTGGTTTGCTACGA
Tnfaip3	forward 5'-3'	GTCAGGAAGCTCGTGGCTCT
	reverse 5'-3'	TTAAGGGTGCTGCAGAGGGC
Noxa	forward 5'-3'	AGATGCCTGGGAAGTCGCAA
	reverse 5'-3'	TCCTCCGGAGTTGAGCACAC
Bax	forward 5'-3'	GATGGCAACTTCAACTGGGGC
	reverse 5'-3'	GCGTCACGGAGGAAGTCCAG
Bcl2l1	forward 5'-3'	CACTGTGCGTGGAAAGCGTA
	reverse 5'-3'	GCTGCTGCATTGTTCCCGTA
Bcl2	forward 5'-3'	GGACTTGAAGTGCCATTGGTA
	reverse 5'-3'	GTTATCATACCCTGTTCTCCCG
Gapdh	forward 5'-3'	AGCAAGGACACTGAGCAAGAG
	reverse 5'-3'	GCAGCGAACTTTATTGATGGT
Hprt1	forward 5'-3'	GGATATGCCCTTGACTATAATGAG
	reverse 5'-3'	GGCAACATCAACAGGACTC
Tbp	forward 5'-3'	ACCAATGACTCCTATGACCC
	reverse 5'-3'	AGTTTACAGCCAAGATTCACG

## Sheet: C. Antibodies for IF
Antibody	Company	Catalogue number	Lot	Dilution
B220	BD Biosciences	553085	9176943	1:200
Cleaved Caspase 3	Cell Signaling	9661S	47	1:200
CD3	Dako	M7254	41497640, 41688518	1:200
CD3 Alexa Fluor® 488	R&D Systems	FAB4841G	ABUS0322041	1:200
CD4	Thermo Fisher	14-9766-82	2526300	1:200
CD8a	Thermo Fisher	14-0808-82	2720194	1:200
ChgA	Proteintech	10529-1-AP	46684	1:200
Dcamkl1	Abcam	ab31704	1015784-2	1:200
Donkey anti-rabbit (488)	Thermo Fisher	A21206	2541645	1:1000
Donkey anti-rabbit (546)	Thermo Fisher	A10040	2541645	1:1000
Donkey anti-rabbit (647)	Thermo Fisher	A31573	2541645	1:1000
Donkey anti-mouse (488)	Thermo Fisher	A21202	2428531	1:1000
Donkey anti-mouse (546)	Thermo Fisher	A10036	1078784	1:1000
Donkey anti-mouse (647)	Thermo Fisher	A31571	2720365	1:1000
Donkey anti-rat (488)	Thermo Fisher	A21208	2310102	1:1000
Donkey anti-rat (647)	Thermo Fisher	A78947	2668651	1:1000
Donkey anti-goat (488)	Thermo Fisher	A11055	2301114	1:1000
Donkey anti-goat (546)	Thermo Fisher	A11056	2432051	1:1000
Donkey anti-goat (647)	Thermo Fisher	A21447	2544596	1:1000
Goat anti-rabbit (750)	Thermo Fisher	A21039	2544596	1:1000
E-Cadherin	BD Biosciences	610181	3138351, 3101384	1:200
F4/80	Cell Signaling	70076S	8	1:200
FoxP3	Cell Signaling	12653S	9	1:400
GFP	Abcam	ab6673	1033180-6, 1033180-1	1:200
GFP	Abcam	ab13970	1018753-1	1:200
HepPar1	Novus Biologicals	NBP2-45272	MSM4-966P230102	1:200
HLA-DR	BioLegend	307605	B388556	1:100
Ki67	Thermo Fisher	14-5698-80	2488559, 2747806, 2747806	1:200
Lipocalin-2	Abcam	AB125075	1000336-5	1:200
Ly6G	Cell Signaling	87048T	6	1:100
Lysozyme	Dako	A0099	20040597	1:200
MHC class II	Thermo Fisher	14-5321-82	2676910	1:200
Mucin-2	Santa Cruz Biotechnology	sc-15334	K2912	1:200
Mucin-2	Thermo Fisher	MA5-12345	ZB3821337	1:200
P65 (D14E12)	Cell Signaling	8242S	13	1:200
P65 (L8F6)	Cell Signaling	6956S	10	1:200
P65 (K310)	Cell Signaling	3045S	2	1:200
P65 (S468)	Cell Signaling	3039S	7	1:200
P65 (S536)	Cell Signaling	3033S	19	1:200
Perilipin-1	Novus Biologicals	NB110-40760	116882-3	1:200
Steap4	Proteintech	11944-1-AP	80127	1:50
ZO-1	Proteintech	21773-1-AP	106141	1:200

## Sheet: D. Antibodies - flow cytometry
Antibody	Fluorochrome	Company	Cat. no.	Lot	Dilution
CD4	BV480	BD Biosciences	565634	3170159	1:400
CD25	BV785	BioLegend	102051	B396255	1:400
CD45	Alexa532	ThermoFisher	58-0451-82	2470848	1:400
TCRbeta	PE-Cy7	ThermoFisher	25-5961-82	2856297	1:400
Fixable Viability Dye	Zombie NIR	BioLegend	423105	B354830	1:5000
