# Supplementary material for: Pro-inflammatory secretome from intestinal epithelium recruits regulatory T cells for barrier defence
Source: Research Square preprint supplement (doi:10.21203/rs.3.rs-5431057/v1), 2025-05-12
Supplement: Supplementary file 8 [file f67b6c2c2247e36a1fabc939.xlsx]

## Sheet: Legend
Table 3: A. List of NF-κB target genes from the Gilmore database, Boston University. B-P. RNAseq analysis of crypts from Wiltype (Wt) mice or deltaN IEC (dN) mice. n = 4 mice per group, pooled. Each sheet shows log2 fold comparison between two groups with p-value and log fold change standard error (lfcSE). Column on the right shows list of NF-κB target genes (in red if they appear in gene name li…

## Sheet: A. NF-κB target genes
NF-κB target genes
A4
ABCA1
ABCB1
ABCB4
ABCB9
ABCC6
ABCG5
ABCG8
ADH1A
ADORA1
AFP
AGER
AGT
AHCTF1
AICDA
AKR1C1
ALOX12
ALOX5
AMACR
AMF
ANGPT1
APHA1
APOBEC2
APOC3
APOD
APOE
AQP4
AR
ARFRP1
ARODA2A
ART1
ASPH
ASS1
BACE1
BAX
BCL2A1
BCL2BCL2C11
BCL2L1
BCL3
BDKRB1
BDKRB1
BDNF
BGN
BLIMP1
BLNK
BLR1
BMI1
BMP2
BMP4
BNIP3
BRCA2
BTK
C3
C4BPA
C69
CALCB
CASP4
CAV1
CCL1
CCL15
CCL17
CCL19
CCL2
CCL20
CCL22
CCL23
CCL28
CCL3
CCL4
CCL5
CXCL12
CCND1
CCND2
CCR5
CCR7
CD2
CD209
CD23
CD274
CD38
CD3G
CD3G
CD40
CD40LG
CD44
CD48
CD54
CD80
CD86
CDK6
CDKNIA
CDX1
CEBPD
CFB
CFB
CFLAR
CGM2
CHI3L1
CIDEA
CLDN2
COL1A2
CR2
CREB3
CRPHAMP
CSF1
CSF2
CSF5
CTSB
CTSL
CXCL1
CXCL2
CXCL8
CXCL10
CXCL11
CXCL3
CXCL3
CXCL5
CXCL6
CXCL8
CXCL9
CYP19A1
CYP2C11
CYP2E1
CYP7B1
DCTN4
DEFB2
DIO1
DMP1
DNASE1L2
DPYD
DUSP1
E2F3
EGFR
EGR1
ELF3
END1
ENG
ENO2
EPI3
EPO
ERBB2
F11R
F3
F8
FABP6
FAM148A
FAS
FASLG
FCER2
FDGRT
FGF8
FN1
FOS
FSTL3
FTH1
FTH1
G6PC
G6PQ
GAD1
GADD45B
GATA3
GBP1
GCLC
GCLC
GCLM
GCLM
GCNT1
GJB1
GNAI2
GNB2L1
GNRH2
GRIN2A
GRM2
GSTP1
GUCY1A2
GZMB
HBE1
HBZ
HGF
HIF1A
HLAB
HLAG
HMGN1
HMOX1
HOXA9
HPSE
HSD11B2
HSD17B8
HSP90AA1
ICOS5
IER2
IER3
IFI44L
IFNB1
IFNG
IGFBP1
IGFBP3
IGFBP2
IGHC
IGHE
IGHG1
IGHG2
IGHG4
IL10
IL11
IL12B
IL13
IL15
IL16
IL17
IL18
IL1A
IL1B
IL1RN
IL2
IL23A
IL27
IL2RA
IL6
IL8RA
IL8RB
IL9
INHBA
IRF1
IRF2
IRF4
IRF7
JMJD3
JUNB
KC
KCNK5
KCNN2
KISS1
KITLG
KLF10
KLK3
KLRA1
KRT15
KRT3
KRT5
KRT6B
LAMB2
LBP
LCN2
LEF1
LGALS3
LIGP1
LPIG
LTA
LTB
LYN
LTF
LYZ
MADCAM1
MAP4K1
MBP
MCP1
MDK
MMP1
MMP3
MMP9
MT3
MTHFR
MUC2
MX1
MYB
MYC
MYLK
MYOZ1
NCAM
NFKB1
NFKB1
NFKB2
NFKBIA
NFKBIE
NFKIZ
NGFB
NK4
NLRP2
NOD2
NOS1
NOS2A
NOS2A
NOX1
NPY1R
NQO1
NR4A2
NRG1
NUAK2
OLR1
OPN1SW
OPRD1
OPRM1
ORM1
OXTR
PAFAH2
PAX8
PDE7A
PDGFB
PDYN
PENK
PGK1
PGLYRP1
PGR
PI3
PI3AP1
PIGF
PIK3CA
PIM1
PLA2
PLAU
PLGR
PLK3
PNPN13
POMC
PPARGC1B
PPP5C
PRF1
PRKACA
PRKCD
PRKD1
PRL
PSMB9
PSME1
PSME2
PTAFR
PTEN
PTGDS
PTGES
PTGIS
PTGS2
PTHLH
PTPN1
PTS
PYCARD
RAG1
RAG2
RBBP4
RDH1
RDH7
REL
RELB
REV3L
RIPK2
S100A10
S100A4
S100A6
SAA1
SAA1
SAA3
SAT1
SCD4
SCL11A2
SELE
SELP
SELS
SENP2
SERPINA1
SERPINA2
SERPINA3
SERPINB1
SERPINE1
SERPINE2
SH3BGRL
SKP2
SLC16A1
SLC3A2
SLC6A6
SLFN2
SNAI1
SOD1
SOD2
SOX9
SPATA19
SPI1
SPP1
ST6GAL1
ST8SIA1
SUPV3L1
SZAT5A
TACR1
TAP1
TAPBP
TCRB
TERT
TFEC
TFF3
TFPI2
TGM1
THBS1
THBS2
TICAM1
TIFA
TLR9
TNC
TNF
TNFAIP2
TNFAIP3
TNFRSF4
TNFRSF9
TNFSF10
TNFSF13B
TNFSF13B
TNFSF15
TNFSFRF1B
TNIP1
TNIP3
TRAF1
TRAF2
TREM1
TRP53
TRPC1
TWIST1
UCP2
UGCGL1
UPK1B
UPP1
VCAM1
VEGFC
VIM
VPS53
WERVWE1
WNT10B
WT1
XDH
XIAP
YY1
ZNF366

## Sheet: B. dN ut vs Wt ut
Reference Number	baseMean	log2FoldChange	lfcSE	stat	p-value	p adj	gene name		NF-κB target genes (overlap)
ENSMUSG00000059014	0.979116	59.8221	5.22092	11.4581	2.14049e-30	6.03576e-26	Gm5409		A4
ENSMUSG00000100140	0.669781	57.2995	5.21867	10.9797	4.78406e-28	6.74504e-24	Gm28789		ABCA1
ENSMUSG00000110556	0.93887	54.0978	5.23158	10.3406	4.61572e-25	4.33847e-21	Gm45762		ABCB1
ENSMUSG00000082648	1.00101	52.1784	5.22201	9.99201	1.65202e-23	9.31676e-20	Gm11366		ABCB4
ENSMUSG00000113479	0.978435	49.4127	5.2463	9.41858	4.57219e-21	1.62931e-17	AC068459.1		ABCB9
ENSMUSG00000040197	0.524931	45.7074	5.22594	8.74625	2.20553e-18	5.18263e-15	Cd209e		ABCC6
ENSMUSG00000106897	0.56742	43.969	5.21238	8.43548	3.29839e-17	6.20053e-14	Gm43027		ABCG5
ENSMUSG00000111865	0.493761	43.7762	5.24594	8.34478	7.13442e-17	1.25735e-13	AC153729.4		ABCG8
ENSMUSG00000107486	0.836185	42.2129	5.20758	8.10605	5.22909e-16	7.76052e-13	Trbv4		ADH1A
ENSMUSG00000000411	0.450501	41.8576	5.23728	7.99225	1.32503e-15	1.86816e-12	Tssk3		ADORA1
ENSMUSG00000097263	0.731744	39.5373	5.23758	7.54876	4.39406e-14	4.76553e-11	Gm26804		AFP
ENSMUSG00000000215	0.598958	39.0007	5.2202	7.47111	7.95213e-14	8.00836e-11	Ins2		AGER
ENSMUSG00000035932	0.636946	38.3502	5.20857	7.36291	1.79949e-13	1.63684e-10	Olfr750		AGT
ENSMUSG00000097469	0.732891	38.1076	5.22857	7.28834	3.1379e-13	2.76508e-10	Gm26733		AHCTF1
ENSMUSG00000030976	0.875344	36.3864	5.23323	6.95296	3.57708e-12	2.72612e-09	Tex36		AICDA
ENSMUSG00000081189	0.622591	35.4182	5.22589	6.77745	1.22318e-11	8.8439e-09	Hspd1-ps4		AKR1C1
ENSMUSG00000099532	0.511734	33.6746	5.20398	6.47093	9.73991e-11	5.84353e-08	Gm29098		ALOX12
ENSMUSG00000058250	0.404192	33.4087	5.22665	6.392	1.6373e-10	9.42213e-08	Tas2r138		ALOX5
ENSMUSG00000097235	0.896351	32.2316	5.23756	6.15394	7.55825e-10	3.80585e-07	Gm17250		AMACR
ENSMUSG00000076571	7.0291	30.3895	4.32951	7.01916	2.23208e-12	1.79829e-09	Igkv5-37		AMF
ENSMUSG00000113817	0.724225	30.1258	5.22099	5.77014	7.92058e-09	3.66138e-06	Gm21056		ANGPT1
ENSMUSG00000110146	0.710761	28.9605	5.22587	5.54175	2.99461e-08	1.20631e-05	Gm45487		APHA1
ENSMUSG00000082720	0.660401	27.8992	5.20622	5.35882	8.37693e-08	3.1495e-05	Gm12489		APOBEC2
ENSMUSG00000073938	0.75812	25.7971	3.37932	7.63383	2.27889e-14	2.79392e-11	Olfr632		APOC3
ENSMUSG00000108308	0.670283	25.769	5.2182	4.93829	7.88086e-07	0.000233921	Gm45218		APOD
ENSMUSG00000100277	0.798621	25.5599	4.07291	6.27557	3.48361e-10	1.85341e-07	1810053B23Rik		APOE
ENSMUSG00000036095	1.6587	25.1336	5.22828	4.80725	1.53024e-06	0.000440302	Dgkb		AQP4
ENSMUSG00000105629	1.47536	24.8833	4.31777	5.76299	8.26376e-09	3.75841e-06	Trav7n-5		AR
ENSMUSG00000102139	0.725545	24.1693	5.21876	4.63123	3.63499e-06	0.000995141	Gm37109		ARFRP1
ENSMUSG00000105876	0.554851	22.7403	5.21221	4.3629	1.28352e-05	0.0031472	Gm43572		ARODA2A
ENSMUSG00000078531	0.547823	21.9149	4.24281	5.1652	2.4018e-07	8.06261e-05	Gm831		ART1
ENSMUSG00000106596	0.64979	21.2392	5.03056	4.22203	2.42107e-05	0.00555035	Gm42822		ASPH
ENSMUSG00000082129	1.28235	20.9199	2.87577	7.27452	3.47645e-13	2.97057e-10	Gm14502		ASS1
ENSMUSG00000101603	0.730048	20.5882	4.09258	5.03062	4.88903e-07	0.0001549	Gm28730		BACE1
ENSMUSG00000082962	0.917908	20.3676	3.98699	5.10853	3.24674e-07	0.000104036	Gm10601		BAX
ENSMUSG00000089185	0.729393	20.286	5.22813	3.88017	0.000104382	0.0187475	Gm22940		BCL2A1
ENSMUSG00000102556	0.68786	19.9883	5.22428	3.82604	0.000130222	0.0230943	Gm37569		BCL2BCL2C11
ENSMUSG00000091722	3.23126	19.3502	5.21271	3.71211	0.000205539	0.0335016	Siah3		BCL2L1
ENSMUSG00000104961	0.936984	19.1951	3.37321	5.69046	1.267e-08	5.58232e-06	Gm43835		BCL3
ENSMUSG00000024223	0.789618	18.9879	3.96413	4.78993	1.66836e-06	0.00047516	Armc12		BDKRB1
ENSMUSG00000020524	0.830253	18.8526	5.23237	3.60308	0.000314473	0.0452424	Gria1		BDKRB1
ENSMUSG00000112877	0.967551	18.8114	4.46812	4.21013	2.55222e-05	0.00575739	AC174742.1		BDNF
ENSMUSG00000066072	1.5693	18.564	4.30713	4.31006	1.63208e-05	0.00396735	Cyp4a10		BGN
ENSMUSG00000076518	62.1772	18.4944	2.42494	7.62673	2.40777e-14	2.82892e-11	Igkv2-112		BLIMP1
ENSMUSG00000081731	0.936321	18.2657	3.42148	5.33854	9.36991e-08	3.43133e-05	Calr-ps		BLNK
ENSMUSG00000104272	3.28235	18.1209	1.92419	9.41743	4.62247e-21	1.62931e-17	Gm38297		BLR1
ENSMUSG00000036557	0.494895	17.4735	5.22101	3.34676	0.000817613	0.0948767	Stpg4		BMI1
ENSMUSG00000107574	0.432879	17.4111	5.23215	3.32771	0.000875627	0.0994034	Gm17834		BMP2
ENSMUSG00000112112	1.85863	17.2876	4.68333	3.69131	0.000223106	0.0349972	AC154300.1		BMP4
ENSMUSG00000113334	1.19204	16.993	3.78839	4.48554	7.27282e-06	0.00189888	D030007L05Rik		BNIP3
ENSMUSG00000037942	1.10226	16.8086	5.18986	3.23874	0.00120061	0.121997	Crp		BRCA2
ENSMUSG00000094066	0.665771	16.5726	4.14101	4.00206	6.27929e-05	0.0123821	Fam205a2		BTK
ENSMUSG00000038602	1.95639	16.1729	3.10565	5.20758	1.91317e-07	6.57897e-05	Slc35f1		C3
ENSMUSG00000107593	0.870802	15.8265	5.22825	3.02711	0.00246908	0.190227	Gm44097		C4BPA
ENSMUSG00000026805	0.548682	15.7681	5.18664	3.04014	0.0023647	0.185738	Barhl1		C69
ENSMUSG00000092374	0.751043	15.7186	2.95007	5.32821	9.91852e-08	3.58567e-05	Gm6623		CALCB
ENSMUSG00000103589	0.834974	15.0554	3.42003	4.40212	1.07199e-05	0.00265156	Gm37840		CASP4
ENSMUSG00000106630	5.44121	14.7896	2.82701	5.23153	1.6811e-07	5.85231e-05	Igkv2-116		CAV1
ENSMUSG00000041358	1.00347	14.5097	3.27518	4.43021	9.4141e-06	0.00239152	Nutm1		CCL1
ENSMUSG00000103358	1.42091	14.4929	3.87592	3.73921	0.000184598	0.0308006	Gm37593		CCL15
ENSMUSG00000090574	1.57962	14.4103	2.59552	5.552	2.82427e-08	1.15418e-05	Traj61		CCL17
ENSMUSG00000094131	0.618935	14.1482	5.23403	2.70311	0.00686933	0.33107	Gm22265		CCL19
ENSMUSG00000083956	0.446291	13.7796	5.23255	2.63343	0.0084527	0.362784	Gm12361		CCL2
ENSMUSG00000102786	4.9825	13.7499	1.96634	6.99266	2.69729e-12	2.11273e-09	Gm38252		CCL20
ENSMUSG00000094293	0.708254	13.3457	5.2322	2.55069	0.010751	0.401968	Gm3893		CCL22
ENSMUSG00000092323	0.870418	13.274	5.23175	2.5372	0.0111744	0.406093	BB365896		CCL23
ENSMUSG00000108750	0.922378	12.805	2.74615	4.6629	3.11792e-06	0.000870485	Gm44750		CCL28
ENSMUSG00000099075	1.306	12.7585	2.4244	5.26252	1.42095e-07	5.00849e-05	Mir7674		CCL3
ENSMUSG00000086000	0.982942	12.6937	5.24213	2.42148	0.0154576	0.46271	Gm12493		CCL4
ENSMUSG00000106039	0.65825	12.2542	5.24567	2.33606	0.0194882	0.496711	Iglc4		CCL5
ENSMUSG00000111389	1.2166	12.0756	3.39157	3.56046	0.000370207	0.0516788	Gm39465		CXCL12
ENSMUSG00000095387	4.27712	11.7636	2.29165	5.13325	2.84785e-07	9.33764e-05	Trav6d-4		CCND1
ENSMUSG00000076800	0.95734	11.2904	5.23457	2.15689	0.0310141	0.589192	Trav6n-5		CCND2
ENSMUSG00000115480	1.84173	11.2081	3.38866	3.30753	0.000941234	0.104905	AC132833.1		CCR5
ENSMUSG00000071490	0.881859	10.42	5.21736	1.99718	0.0458055	0.664716	Vmn1r212		CCR7
ENSMUSG00000078683	2.57301	10.4146	5.23448	1.98961	0.0466334	0.665894	Mup1		CD2
ENSMUSG00000113029	0.75428	10.0331	4.16717	2.40764	0.0160559	0.469653	Gm40578		CD209
ENSMUSG00000112887	0.566611	9.95175	5.22651	1.90409	0.0568984	0.711811	AC155258.1		CD23
ENSMUSG00000059908	5.48954	9.88438	5.2467	1.88392	0.0595753	0.719572	Mug1		CD274
ENSMUSG00000098121	0.72599	9.68432	5.20802	1.8595	0.062956	0.732962	Gm27038		CD38
ENSMUSG00000093687	0.5639	7.74771	5.20073	1.48974	0.136294	0.888251	Gm20637		CD3G
ENSMUSG00000089949	0.961934	7.49428	2.91682	2.56933	0.0101895	0.394216	Gm16137		CD3G
ENSMUSG00000104121	0.847559	7.09979	3.07589	2.3082	0.0209879	0.509746	Gm37485		CD40
ENSMUSG00000099842	0.775949	6.86118	5.20335	1.31861	0.1873	0.942211	Gm4034		CD40LG
ENSMUSG00000107642	0.667401	6.76915	5.146	1.31542	0.188369	0.942211	Tas2r141-ps4		CD44
ENSMUSG00000102520	0.593984	6.67767	4.26389	1.5661	0.117326	0.860135	Gm36941		CD48
ENSMUSG00000109290	1.25019	6.54866	3.80701	1.72016	0.0854034	0.804882	Phgdh-ps1		CD54
ENSMUSG00000037996	0.623668	6.34296	5.237	1.21118	0.225826	0.968369	Slc24a2		CD80
ENSMUSG00000097580	0.441887	6.31339	5.21653	1.21027	0.226177	0.968563	Gm5432		CD86
ENSMUSG00000112991	0.674026	6.05645	5.17066	1.17131	0.241474	0.979345	Gm36635		CDK6
ENSMUSG00000100723	0.443487	5.5079	5.18819	1.06162	0.288406	1	Gm28160		CDKNIA
ENSMUSG00000114313	0.790027	5.43478	4.0791	1.33235	0.182747	0.938109	CT009527.1		CDX1
ENSMUSG00000104118	0.722697	5.25087	4.22942	1.24151	0.214417	0.964035	Gm37298		CEBPD
ENSMUSG00000097421	4.46162	5.16958	2.63453	1.96224	0.0497344	0.680101	D630011A20Rik		CFB
ENSMUSG00000107576	1.69362	4.95157	2.13497	2.31927	0.0203806	0.506803	Gm44093		CFB
ENSMUSG00000085087	0.759607	4.75515	4.8067	0.989274	0.322529	1	Gm13528		CFLAR
ENSMUSG00000112544	0.871821	4.75027	3.94715	1.20347	0.228795	0.970206	AC153821.1		CGM2
ENSMUSG00000083457	1.32886	4.7121	5.03231	0.936368	0.349084	1	Cyp4b1-ps2		CHI3L1
ENSMUSG00000096551	0.771059	4.68142	5.20595	0.899244	0.368523	1	Trav10		CIDEA
ENSMUSG00000029409	5.58275	4.65286	2.26012	2.05868	0.0395248	0.640897	U90926		CLDN2
ENSMUSG00000105818	2.29643	4.62937	2.68021	1.72724	0.0841238	0.802206	Gm43256		COL1A2
ENSMUSG00000073063	1.32266	4.61871	2.82603	1.63434	0.102187	0.839801	Hbq1b		CR2
ENSMUSG00000109656	5.07451	4.57684	2.22755	2.05465	0.0399128	0.642422	Gm45548		CREB3
ENSMUSG00000088591	1.88196	4.52564	2.44853	1.84831	0.0645579	0.73798	Gm23964		CRPHAMP
ENSMUSG00000108979	0.74999	4.48681	5.15569	0.870265	0.384156	1	1700016B15Rik		CSF1
ENSMUSG00000076471	10.4357	4.42232	1.51756	2.9141	0.00356713	0.238355	Trbv14		CSF2
ENSMUSG00000095497	15.1256	4.37887	1.61219	2.71611	0.00660548	0.32614	Igkv1-122		CSF5
ENSMUSG00000089943	5.01488	4.37511	1.66982	2.6201	0.0087903	0.368853	Ugt1a5		CTSB
ENSMUSG00000102293	0.657316	4.36539	5.1946	0.840372	0.4007	1	Gm37541		CTSL
ENSMUSG00000025229	0.727217	4.3573	5.19872	0.838148	0.401948	1	Pitx3		CXCL1
ENSMUSG00000079371	1.87989	4.32275	2.18279	1.98038	0.0476605	0.669288	Gm3476		CXCL2
ENSMUSG00000085097	1.31057	4.32202	3.2824	1.31673	0.18793	0.942211	Gm13049		CXCL8
ENSMUSG00000085331	2.47	4.28935	1.78245	2.40644	0.0161088	0.470102	Gm11274		CXCL10
ENSMUSG00000020067	0.62456	4.26586	4.97335	0.857743	0.391034	1	Mypn		CXCL11
ENSMUSG00000076764	1.83864	4.26281	2.23068	1.911	0.0560052	0.704072	Trav6-2		CXCL3
ENSMUSG00000110153	1.25017	4.25264	3.56251	1.19372	0.232587	0.97374	Gm17766		CXCL3
ENSMUSG00000105128	7.1193	4.20162	1.78197	2.35785	0.018381	0.489567	Gm42870		CXCL5
ENSMUSG00000097147	2.38753	4.11484	1.74299	2.3608	0.0182358	0.488796	Gm26780		CXCL6
ENSMUSG00000104621	1.46457	4.06297	2.82877	1.4363	0.150917	0.906962	Gm43185		CXCL8
ENSMUSG00000092748	1.29516	4.02897	3.5788	1.12579	0.260256	0.986332	Gm22175		CXCL9
ENSMUSG00000070388	1.43563	3.97204	2.40461	1.65185	0.0985659	0.833483	Fbxo39		CYP19A1
ENSMUSG00000109311	1.32572	3.96809	2.17177	1.82712	0.0676815	0.75226	AI314278		CYP2C11
ENSMUSG00000045915	1.46657	3.94728	1.84692	2.13723	0.0325796	0.599827	Ccdc42		CYP2E1
ENSMUSG00000114719	1.19364	3.94116	1.99423	1.97628	0.0481226	0.673096	AC129085.5		CYP7B1
ENSMUSG00000095607	1.21106	3.9298	3.62711	1.08345	0.278608	0.998762	Trav5-4		DCTN4
ENSMUSG00000097027	1.34245	3.87045	2.03495	1.90199	0.0571722	0.711894	Gm26559		DEFB2
ENSMUSG00000096168	4.81052	3.83922	1.76389	2.17656	0.0295134	0.580348	Trav5n-4		DIO1
ENSMUSG00000112637	0.694061	3.8209	4.05816	0.941535	0.346431	1	AC124346.2		DMP1
ENSMUSG00000064646	0.553592	3.81994	4.23087	0.902873	0.366593	1	Gm23300		DNASE1L2
ENSMUSG00000053961	2.63137	3.81987	1.84195	2.07382	0.0380959	0.630786	Ang5		DPYD
ENSMUSG00000095056	5.08598	3.815	1.35458	2.81637	0.00485693	0.27282	Gm3159		DUSP1
ENSMUSG00000070563	6.19225	3.8129	1.85254	2.05821	0.0395705	0.641269	Spaca4		E2F3
ENSMUSG00000095416	32.5213	3.79175	1.20293	3.15208	0.0016211	0.146512	Ighv1-12		EGFR
ENSMUSG00000081041	0.514331	3.77848	5.03306	0.750732	0.452814	1	Nlk-ps1		EGR1
ENSMUSG00000103291	1.13616	3.77683	4.28155	0.882119	0.377713	1	Gm38235		ELF3
ENSMUSG00000111758	3.80767	3.76581	1.44481	2.60644	0.00914894	0.376651	Gm30373		END1
ENSMUSG00000108060	2.52857	3.73865	1.79417	2.08377	0.0371808	0.627005	4921529L05Rik		ENG
ENSMUSG00000114206	1.63842	3.71575	2.82378	1.31588	0.188215	0.942211	AC159301.1		ENO2
ENSMUSG00000096096	1.40026	3.71141	2.38375	1.55696	0.119479	0.86405	Trav4-4-dv10		EPI3
ENSMUSG00000090939	0.59017	3.71137	4.85573	0.764327	0.444672	1	Gm17147		EPO
ENSMUSG00000110361	2.15185	3.70627	1.48693	2.49257	0.0126823	0.425734	Gm8291		ERBB2
ENSMUSG00000094792	1.26969	3.68036	3.59412	1.02399	0.305838	1	Trav10d		F11R
ENSMUSG00000107491	2.74965	3.67846	1.39315	2.64038	0.00828125	0.360775	Gm17893		F3
ENSMUSG00000074782	3.63023	3.67709	1.55515	2.36446	0.0180562	0.488012	4833422C13Rik		F8
ENSMUSG00000073652	1.84564	3.67583	3.00564	1.22298	0.221339	0.968127	Apol7d		FABP6
ENSMUSG00000093075	0.869141	3.66603	4.57187	0.801867	0.42263	1	Gm25948		FAM148A
ENSMUSG00000099276	0.812767	3.66442	4.55616	0.804277	0.421237	1	Gm27228		FAS
ENSMUSG00000092591	2.82885	3.65892	1.93441	1.89149	0.0585589	0.717497	Gm20429		FASLG
ENSMUSG00000105083	1.01798	3.65603	4.50952	0.810736	0.417517	1	Gm42699		FCER2
ENSMUSG00000083341	1.00426	3.64994	3.26614	1.11751	0.263777	0.989754	Gm14238		FDGRT
ENSMUSG00000114380	1.92947	3.62617	1.68438	2.15283	0.0313324	0.590977	AC154454.1		FGF8
ENSMUSG00000084854	0.876536	3.62577	5.16152	0.702462	0.482391	1	Gm12678		FN1
ENSMUSG00000082593	0.565514	3.61874	5.19366	0.696762	0.485952	1	Gm11331		FOS
ENSMUSG00000098945	0.978556	3.61315	3.66239	0.986553	0.323862	1	Gm27150		FSTL3
ENSMUSG00000096106	4.54667	3.60368	1.98953	1.81132	0.0700908	0.759617	Trav5d-4		FTH1
ENSMUSG00000102844	0.497146	3.59143	5.17665	0.693775	0.487824	1	Gm38034		FTH1
ENSMUSG00000077611	1.38127	3.58272	3.1072	1.15304	0.248895	0.982589	Gm23946		G6PC
ENSMUSG00000088542	3.22095	3.58172	1.62044	2.21034	0.0270817	0.564829	Gm24962		G6PQ
ENSMUSG00000113680	0.449329	3.57984	5.17105	0.692285	0.488758	1	AC158115.2		GAD1
ENSMUSG00000089959	0.668614	3.5765	4.93264	0.725068	0.46841	1	Gm16268		GADD45B
ENSMUSG00000105395	2.33601	3.54986	1.87545	1.8928	0.0583847	0.717388	Gm42672		GATA3
ENSMUSG00000093156	0.567592	3.54659	4.29854	0.825067	0.409333	1	Mir3076		GBP1
ENSMUSG00000081516	1.08107	3.54576	2.20372	1.60899	0.107619	0.847056	Gm12470		GCLC
ENSMUSG00000079639	1.73572	3.53678	3.69237	0.957861	0.338133	1	Rhox4a		GCLC
ENSMUSG00000106818	1.3437	3.53469	2.11814	1.66877	0.0951621	0.828515	Gm43790		GCLM
ENSMUSG00000111833	1.37108	3.51877	3.06181	1.14925	0.250455	0.983117	AC156795.1		GCLM
ENSMUSG00000102157	1.71094	3.51857	2.50248	1.40603	0.159715	0.915032	Gm37470		GCNT1
ENSMUSG00000096356	1.9351	3.51736	2.27251	1.54778	0.121674	0.868284	Olfr889		GJB1
ENSMUSG00000087794	2.86059	3.50144	2.17408	1.61054	0.10728	0.847056	Gm25966		GNAI2
ENSMUSG00000086391	0.57504	3.49353	5.0789	0.687852	0.491546	1	1700042O10Rik		GNB2L1
ENSMUSG00000046192	1.03841	3.48965	3.19135	1.09347	0.274187	0.995367	Iqub		GNRH2
ENSMUSG00000099408	0.460163	3.48744	5.17479	0.673929	0.500356	1	Gm28311		GRIN2A
ENSMUSG00000107385	1.11752	3.4624	2.42894	1.42548	0.154019	0.90932	C330024D21Rik		GRM2
ENSMUSG00000095495	3.15037	3.45888	1.66576	2.07646	0.0378517	0.629805	Trav9d-3		GSTP1
ENSMUSG00000104620	2.04575	3.45826	2.09237	1.6528	0.0983722	0.833483	Trav7-1		GUCY1A2
ENSMUSG00000098871	3.17909	3.45459	1.70477	2.02643	0.0427207	0.650101	Mir6381		GZMB
ENSMUSG00000108476	0.459634	3.45314	5.18187	0.666389	0.505162	1	Gm44974		HBE1
ENSMUSG00000103586	0.810509	3.44394	3.32187	1.03675	0.299853	1	5830405F06Rik		HBZ
ENSMUSG00000112822	5.27706	3.43986	1.31476	2.61633	0.00888809	0.369655	A130012E19Rik		HGF
ENSMUSG00000084890	5.93804	3.42898	1.61774	2.11961	0.0340392	0.612652	A830036E02Rik		HIF1A
ENSMUSG00000097315	2.72746	3.42668	1.78002	1.92508	0.0542197	0.696873	Gm26568		HLAB
ENSMUSG00000076531	4.01465	3.42236	2.15129	1.59084	0.111645	0.852625	Igkv4-92		HLAG
ENSMUSG00000111596	2.17906	3.41983	1.74098	1.96432	0.0494934	0.680101	Gm8058		HMGN1
ENSMUSG00000104525	2.20795	3.4141	2.1152	1.61408	0.10651	0.847056	Gm37334		HMOX1
ENSMUSG00000114166	0.951829	3.41216	3.05207	1.11798	0.263574	0.989754	Gm18246		HOXA9
ENSMUSG00000076541	77.6474	3.41213	1.19114	2.86458	0.0041756	0.260485	Igkv4-79		HPSE
ENSMUSG00000065686	0.859195	3.39476	3.70188	0.917038	0.359123	1	Snora5c		HSD11B2
ENSMUSG00000032649	3.76823	3.39255	1.64511	2.0622	0.0391887	0.637647	Colgalt2		HSD17B8
ENSMUSG00000020286	1.65487	3.38828	2.29121	1.47882	0.139189	0.890375	1700093K21Rik		HSP90AA1
ENSMUSG00000104503	4.27764	3.3837	1.51966	2.22662	0.0259725	0.556092	Gm37738		ICOS5
ENSMUSG00000094808	4.15346	3.38267	2.3778	1.4226	0.154852	0.90932	1810009J06Rik		IER2
ENSMUSG00000035557	34.7204	3.38232	2.93195	1.15361	0.248662	0.982589	Krt17		IER3
ENSMUSG00000080370	1.64172	3.38111	2.01106	1.68126	0.0927131	0.821339	Gm22952		IFI44L
ENSMUSG00000103378	1.58035	3.37698	3.07321	1.09885	0.271835	0.992376	Gm37176		IFNB1
ENSMUSG00000105846	1.39977	3.37206	2.85172	1.18246	0.237022	0.976608	Gm43258		IFNG
ENSMUSG00000070695	2.04943	3.37144	1.68639	1.9992	0.0455865	0.663971	Cntnap5a		IGFBP1
ENSMUSG00000111131	1.59633	3.36018	1.92899	1.74194	0.081519	0.794119	9930024M15Rik		IGFBP3
ENSMUSG00000113557	0.479844	3.35621	5.17911	0.648029	0.516966	1	AC153143.2		IGFBP2
ENSMUSG00000084816	1.07352	3.35434	2.76413	1.21352	0.224929	0.968316	Platr29		IGHC
ENSMUSG00000053626	4.36698	3.35241	1.94961	1.71953	0.0855177	0.805185	Tll1		IGHE
ENSMUSG00000038760	0.456889	3.35051	5.21527	0.642444	0.520585	1	Trhr		IGHG1
ENSMUSG00000089673	0.878496	3.34866	2.30108	1.45526	0.145598	0.900655	Gm16546		IGHG2
ENSMUSG00000106567	7.25761	3.34663	1.63981	2.04087	0.0412641	0.648238	2010309G21Rik		IGHG4
ENSMUSG00000106040	2.19776	3.34586	2.38879	1.40065	0.161318	0.917241	Cyp3a63-ps		IL10
ENSMUSG00000103147	1.89497	3.34498	1.91234	1.74915	0.0802643	0.789511	Gm7341		IL11
ENSMUSG00000112161	0.46382	3.34411	5.17355	0.646386	0.51803	1	Gm34045		IL12B
ENSMUSG00000073179	1.12831	3.33802	2.31252	1.44345	0.148894	0.904936	Gm10478		IL13
ENSMUSG00000103159	0.88081	3.33396	3.8307	0.870326	0.384122	1	F830112A20Rik		IL15
ENSMUSG00000083893	0.588579	3.32926	4.31759	0.771091	0.440653	1	Gm13347		IL16
ENSMUSG00000106620	0.75139	3.32676	4.02371	0.826791	0.408356	1	Trav7-5		IL17
ENSMUSG00000076840	5.03761	3.32173	1.54357	2.15198	0.0313992	0.591841	Trav14-1		IL18
ENSMUSG00000095620	14.3731	3.3204	1.56485	2.12187	0.0338483	0.611173	2010005H15Rik		IL1A
ENSMUSG00000102423	1.97362	3.31632	2.09322	1.58431	0.113122	0.853849	Gm37465		IL1B
ENSMUSG00000106115	1.48078	3.3124	2.55613	1.29587	0.195021	0.948093	Gm43420		IL1RN
ENSMUSG00000111924	2.39388	3.31014	1.71047	1.93522	0.0529634	0.69256	4930556N09Rik		IL2
ENSMUSG00000083332	5.30414	3.30792	1.25668	2.63227	0.00848172	0.362925	Gm7599		IL23A
ENSMUSG00000111528	0.57031	3.30755	5.18516	0.637887	0.523547	1	Gm39460		IL27
ENSMUSG00000038916	3.96395	3.29928	1.18266	2.78971	0.00527554	0.286077	Soga3		IL2RA
ENSMUSG00000110141	2.27293	3.29093	2.03784	1.61491	0.106329	0.847056	Gm45684		IL6
ENSMUSG00000106751	8.01186	3.28866	1.11386	2.9525	0.0031521	0.220553	Gm42467		IL8RA
ENSMUSG00000077506	2.15039	3.27565	1.55881	2.10138	0.035608	0.617824	Scarna9		IL8RB
ENSMUSG00000103701	0.696894	3.26925	5.17433	0.631821	0.527504	1	Gm10728		IL9
ENSMUSG00000081949	0.599858	3.26842	5.17639	0.63141	0.527773	1	Gm14392		INHBA
ENSMUSG00000115681	0.547201	3.26187	5.16461	0.631581	0.527661	1	AC140209.1		IRF1
ENSMUSG00000089214	0.633353	3.26136	4.99896	0.652407	0.514139	1	Mir1931		IRF2
ENSMUSG00000027716	2.45602	3.26009	1.75891	1.85348	0.0638142	0.736608	Trpc3		IRF4
ENSMUSG00000094703	1.49198	3.25665	1.62618	2.00264	0.0452156	0.662387	Gm24486		IRF7
ENSMUSG00000070868	2.7909	3.25174	2.69	1.20883	0.22673	0.969126	Skint3		JMJD3
ENSMUSG00000084146	2.09505	3.23765	1.87213	1.7294	0.0837376	0.801683	Gm12104		JUNB
ENSMUSG00000051591	0.54837	3.23725	5.18231	0.624673	0.532186	1	Olfr697		KC
ENSMUSG00000076494	2.69844	3.22249	1.63283	1.97356	0.0484321	0.674951	Trbj2-3		KCNK5
ENSMUSG00000024266	0.916348	3.22214	4.50767	0.714812	0.474725	1	Adad2		KCNN2
ENSMUSG00000103970	1.10161	3.22134	3.73978	0.861371	0.389034	1	Gm37678		KISS1
ENSMUSG00000076269	0.629359	3.21054	4.82476	0.665431	0.505775	1	Mir374b		KITLG
ENSMUSG00000090223	2.73315	3.2071	1.66812	1.92259	0.0545317	0.696873	Pcp4		KLF10
ENSMUSG00000109776	0.474644	3.1973	5.18329	0.616848	0.537335	1	Gm30400		KLK3
ENSMUSG00000096014	0.928557	3.19343	3.68039	0.86769	0.385564	1	Sox1		KLRA1
ENSMUSG00000094966	1.19726	3.19153	3.52202	0.906163	0.36485	1	Trav9-2		KRT15
ENSMUSG00000086937	0.532694	3.19132	5.15052	0.619612	0.535513	1	Gm15063		KRT3
ENSMUSG00000089313	0.682432	3.18603	4.77632	0.667047	0.504742	1	Gm23182		KRT5
ENSMUSG00000098328	0.845529	3.18429	2.87691	1.10684	0.268361	0.991292	Gm27271		KRT6B
ENSMUSG00000086822	0.970379	3.18357	2.80773	1.13386	0.256853	0.985242	5330413P13Rik		LAMB2
ENSMUSG00000076605	4.04609	3.1816	1.77416	1.7933	0.0729247	0.770142	Igkj2		LBP
ENSMUSG00000055159	1.79056	3.18084	1.80701	1.76028	0.0783604	0.783865	4930583K01Rik		LCN2
ENSMUSG00000102058	1.14163	3.16868	2.51812	1.25835	0.208265	0.958021	Gm28470		LEF1
ENSMUSG00000112354	1.16058	3.16397	2.73695	1.15602	0.247673	0.982589	Gm33843		LGALS3
ENSMUSG00000031512	1.52966	3.16366	2.99051	1.0579	0.290102	1	Tex29		LIGP1
ENSMUSG00000112149	1.0483	3.15816	2.03083	1.55511	0.119921	0.864409	AC153948.1		LPIG
ENSMUSG00000038537	0.613672	3.15765	5.18762	0.608689	0.542731	1	Mc3r		LTA
ENSMUSG00000110251	1.52192	3.15171	2.30821	1.36543	0.172117	0.924932	Gm2996		LTB
ENSMUSG00000110882	2.44164	3.14687	1.43658	2.19053	0.0284859	0.57426	Gm7642		LYN
ENSMUSG00000105022	0.588023	3.146	4.23162	0.743451	0.457209	1	Gm43537		LTF
ENSMUSG00000107094	6.85196	3.14254	1.67118	1.88043	0.0600491	0.719572	Gm43294		LYZ
ENSMUSG00000115570	1.23559	3.14168	3.57614	0.878512	0.379666	1	AC123665.3		MADCAM1
ENSMUSG00000102930	1.22897	3.11928	3.62601	0.860252	0.38965	1	Gm38115		MAP4K1
ENSMUSG00000085411	1.37699	3.11724	2.42653	1.28465	0.198915	0.951105	Gm14319		MBP
ENSMUSG00000112879	0.913005	3.11159	4.60655	0.67547	0.499377	1	AC158802.1		MCP1
ENSMUSG00000109697	2.01553	3.10188	2.79354	1.11038	0.266837	0.990627	Gm34030		MDK
ENSMUSG00000112317	3.78172	3.08391	1.50117	2.05434	0.0399428	0.642422	AC153526.2		MMP1
ENSMUSG00000094940	21.924	3.08309	1.4899	2.06932	0.0385159	0.634758	Ighv1-84		MMP3
ENSMUSG00000046916	14.7814	3.08045	1.5192	2.02768	0.0425928	0.649558	Myct1		MMP9
ENSMUSG00000076761	5.56556	3.07402	1.50211	2.04647	0.0407103	0.646088	Trav5-1		MT3
ENSMUSG00000113910	0.582385	3.0698	5.01241	0.61244	0.540247	1	AC160972.1		MTHFR
ENSMUSG00000064637	2.55988	3.06691	1.49882	2.04621	0.040736	0.646088	Snora20		MUC2
ENSMUSG00000060615	32414.4	3.06242	1.13225	2.70473	0.00683606	0.33107	Ang4		MX1
ENSMUSG00000110009	0.619197	3.05446	4.14452	0.736986	0.461131	1	4930543E12Rik		MYB
ENSMUSG00000092412	1.33634	3.04836	3.52378	0.865082	0.386994	1	Gm20507		MYC
ENSMUSG00000107116	0.506988	3.04328	4.28501	0.710216	0.47757	1	Gm43274		MYLK
ENSMUSG00000060268	2.29961	3.03767	1.66699	1.82224	0.0684181	0.753934	Gm1661		MYOZ1
ENSMUSG00000105501	2.4747	3.02923	1.41354	2.14301	0.0321124	0.596631	5330426L24Rik		NCAM
ENSMUSG00000036162	0.763544	3.02892	4.67102	0.648449	0.516694	1	Fam219aos		NFKB1
ENSMUSG00000107222	0.862774	3.0283	3.27748	0.923973	0.3555	1	Gm43198		NFKB1
ENSMUSG00000107115	0.586739	3.02794	5.19203	0.583189	0.559766	1	Gm43052		NFKB2
ENSMUSG00000112599	7.35694	3.01855	1.17848	2.56139	0.0104253	0.398878	AC160863.3		NFKBIA
ENSMUSG00000076606	6.34024	3.00694	1.72915	1.73897	0.08204	0.794119	Igkj3		NFKBIE
ENSMUSG00000103075	1.24415	3.00082	2.63346	1.1395	0.254495	0.983453	Gm38109		NFKIZ
ENSMUSG00000113041	1.08141	3.00038	3.71879	0.806817	0.419772	1	CT025556.1		NGFB
ENSMUSG00000103569	5.05987	2.99837	1.32089	2.26996	0.0232102	0.530373	Gm38067		NK4
ENSMUSG00000045952	0.839879	2.99536	3.44702	0.86897	0.384864	1	Gm5548		NLRP2
ENSMUSG00000089260	1.19221	2.9935	2.29452	1.30463	0.19202	0.945062	Mir1929		NOD2
ENSMUSG00000105109	1.86688	2.98448	1.84496	1.61764	0.10574	0.846342	Gm44297		NOS1
ENSMUSG00000104887	1.33395	2.9808	3.11415	0.957181	0.338476	1	Gm43158		NOS2A
ENSMUSG00000097052	0.647291	2.97181	3.40961	0.871596	0.383429	1	Snhg7		NOS2A
ENSMUSG00000072753	1.1821	2.96939	2.18745	1.35747	0.174633	0.928196	9230020A06Rik		NOX1
ENSMUSG00000112391	0.573414	2.96929	5.00999	0.592674	0.553399	1	AC124572.2		NPY1R
ENSMUSG00000108319	0.829281	2.96815	4.69824	0.631759	0.527544	1	Gm44552		NQO1
ENSMUSG00000104509	0.94211	2.96666	5.18493	0.57217	0.567207	1	Gm33994		NR4A2
ENSMUSG00000113702	1.57001	2.95597	2.77762	1.06421	0.287234	1	Gm35558		NRG1
ENSMUSG00000029656	1.40677	2.95542	2.91438	1.01408	0.310544	1	C8b		NUAK2
ENSMUSG00000103336	0.563543	2.95376	5.17107	0.571209	0.567858	1	Gm37993		OLR1
ENSMUSG00000000003	5.24546	2.95311	5.20129	0.567764	0.570195	1	Pbsn		OPN1SW
ENSMUSG00000109051	1.38687	2.94525	1.70451	1.72792	0.0840025	0.801971	Gm44913		OPRD1
ENSMUSG00000102945	1.58234	2.94239	1.94851	1.51007	0.131025	0.878488	Gm37884		OPRM1
ENSMUSG00000038218	91.3527	2.94108	0.877846	3.35034	0.000807117	0.0948296	Gm9765		ORM1
ENSMUSG00000102323	2.5966	2.93752	1.35193	2.17283	0.029793	0.581267	Gm37790		OXTR
ENSMUSG00000111434	1.41435	2.93618	2.55762	1.14801	0.250964	0.983117	AC120394.2		PAFAH2
ENSMUSG00000109781	1.03414	2.92693	4.10168	0.713593	0.475479	1	Gm45509		PAX8
ENSMUSG00000027525	3.61592	2.92667	1.22996	2.37949	0.0173367	0.481162	Phactr3		PDE7A
ENSMUSG00000048480	6.10362	2.92666	1.66387	1.75895	0.0785862	0.783865	Cxcr1		PDGFB
ENSMUSG00000092415	6.72785	2.92301	1.24093	2.35551	0.0184973	0.489567	Gm20513		PDYN
ENSMUSG00000017007	2.94877	2.92282	1.97223	1.48199	0.138344	0.889078	Rbpjl		PENK
ENSMUSG00000102960	2.08933	2.92168	1.91765	1.52357	0.127615	0.874882	Gm37943		PGK1
ENSMUSG00000098516	1.31831	2.92111	2.6523	1.10135	0.270745	0.991909	Mir7651		PGLYRP1
ENSMUSG00000092371	2.36293	2.91911	2.02361	1.44253	0.149154	0.904936	Gm20511		PGR
ENSMUSG00000114617	1.46643	2.91833	2.91098	1.00252	0.31609	1	AC140397.1		PI3
ENSMUSG00000077549	5.50141	2.91519	1.34829	2.16214	0.0306073	0.588587	Snord71		PI3AP1
ENSMUSG00000096633	3.69524	2.91499	1.31121	2.22313	0.0262071	0.556886	Gm22170		PIGF
ENSMUSG00000065505	0.425994	2.91412	5.18675	0.561839	0.574226	1	Mir148a		PIK3CA
ENSMUSG00000100620	0.778323	2.91248	3.88936	0.748832	0.453958	1	Gm28277		PIM1
ENSMUSG00000115686	0.741471	2.90844	4.05199	0.717781	0.472893	1	AC154528.2		PLA2
ENSMUSG00000105992	1.13976	2.90548	2.80691	1.03512	0.300614	1	Gm43651		PLAU
ENSMUSG00000102371	1.11833	2.90338	2.67212	1.08655	0.277238	0.998762	Olfr258-ps1		PLGR
ENSMUSG00000050623	1.45006	2.90087	4.95988	0.584867	0.558637	1	Catsperz		PLK3
ENSMUSG00000090005	2.87177	2.88589	1.68952	1.70811	0.0876157	0.808438	Gm16540		PNPN13
ENSMUSG00000106156	0.512328	2.88386	5.132	0.561936	0.574159	1	Gm21040		POMC
ENSMUSG00000114853	0.824171	2.8814	2.87219	1.00321	0.31576	1	AC156025.3		PPARGC1B
ENSMUSG00000104479	1.19488	2.87348	3.63851	0.789739	0.42968	1	Gm10305		PPP5C
ENSMUSG00000104834	0.503315	2.86961	5.1953	0.552347	0.58071	1	Gm8861		PRF1
ENSMUSG00000089296	4.44586	2.86919	1.32876	2.15929	0.0308277	0.589192	Gm23205		PRKACA
ENSMUSG00000076709	3.12025	2.86259	2.06948	1.38324	0.166592	0.919214	Ighv1-47		PRKCD
ENSMUSG00000102538	0.457189	2.85884	5.18454	0.551416	0.581348	1	Gm37230		PRKD1
ENSMUSG00000097300	0.482646	2.85764	5.19151	0.550445	0.582014	1	Gm26835		PRL
ENSMUSG00000085351	3.31701	2.84878	1.71043	1.66554	0.0958055	0.828923	Gm12472		PSMB9
ENSMUSG00000110515	2.87528	2.84272	1.55052	1.8334	0.0667432	0.7483	Gm9644		PSME1
ENSMUSG00000051198	0.942706	2.83468	3.10076	0.91419	0.360617	1	4930548G14Rik		PSME2
ENSMUSG00000101029	1.05613	2.82527	4.21369	0.670497	0.502541	1	Gm29439		PTAFR
ENSMUSG00000088552	11.2426	2.82344	0.958222	2.94654	0.00321348	0.223187	Mir1957a		PTEN
ENSMUSG00000114539	1.22024	2.82097	2.81636	1.00164	0.31652	1	AC157650.2		PTGDS
ENSMUSG00000099380	0.807249	2.81387	3.39651	0.828459	0.407411	1	Gm28130		PTGES
ENSMUSG00000103747	0.748845	2.81177	5.17622	0.543209	0.586986	1	Gm38236		PTGIS
ENSMUSG00000039059	1.86323	2.80726	1.56675	1.79177	0.0731698	0.770939	Hrh3		PTGS2
ENSMUSG00000113363	1.5527	2.80586	1.72717	1.62454	0.104261	0.841594	AC127270.1		PTHLH
ENSMUSG00000096715	110.457	2.80528	1.17248	2.39262	0.0167287	0.475258	Igkv3-4		PTPN1
ENSMUSG00000095857	0.769916	2.80324	2.68614	1.04359	0.296673	1	Gm22618		PTS
ENSMUSG00000042501	2.25149	2.80138	4.60303	0.608594	0.542794	1	Cpa6		PYCARD
ENSMUSG00000034968	2.47663	2.79527	1.71061	1.63408	0.102243	0.839801	Lbx2		RAG1
ENSMUSG00000095943	0.58755	2.79334	4.18786	0.667009	0.504766	1	Gm25197		RAG2
ENSMUSG00000021010	1.94667	2.79235	2.93937	0.949982	0.342121	1	Npas3		RBBP4
ENSMUSG00000095068	0.778889	2.78881	4.00559	0.69623	0.486285	1	Gm26189		RDH1
ENSMUSG00000064390	0.483614	2.77819	5.16327	0.538068	0.59053	1	Rnu73b		RDH7
ENSMUSG00000076534	9.95037	2.77452	1.74924	1.58613	0.11271	0.853005	Igkv12-89		REL
ENSMUSG00000106680	2.18392	2.77448	1.61637	1.71649	0.0860721	0.805979	Gm43852		RELB
ENSMUSG00000100315	1.32369	2.76933	3.46002	0.800379	0.423491	1	1700031P21Rik		REV3L
ENSMUSG00000111417	0.879228	2.76642	4.62542	0.598091	0.549779	1	AC158987.1		RIPK2
ENSMUSG00000085141	0.578594	2.76641	4.1085	0.673338	0.500732	1	Gm13429		S100A10
ENSMUSG00000087455	3.53739	2.76461	1.57664	1.75349	0.0795187	0.787578	5330411J11Rik		S100A4
ENSMUSG00000101920	0.707176	2.76299	2.60108	1.06224	0.288125	1	Gm28454		S100A6
ENSMUSG00000107456	1.95497	2.76273	2.24174	1.23241	0.217798	0.965334	Gm10400		SAA1
ENSMUSG00000107586	0.479258	2.75448	5.18393	0.53135	0.595176	1	Gm44283		SAA1
ENSMUSG00000110119	0.636344	2.75427	3.60035	0.765001	0.444271	1	Gm45593		SAA3
ENSMUSG00000100790	0.48305	2.74968	5.19376	0.52942	0.596514	1	Gm28518		SAT1
ENSMUSG00000089093	0.901643	2.74757	2.96681	0.926105	0.354392	1	Snord11		SCD4
ENSMUSG00000110068	0.885098	2.74531	3.79155	0.72406	0.469029	1	Gm45294		SCL11A2
ENSMUSG00000086907	1.2231	2.74448	3.15063	0.871089	0.383706	1	Gm15298		SELE
ENSMUSG00000064558	2.30524	2.7442	1.3274	2.06735	0.0387012	0.635477	Gm24620		SELP
ENSMUSG00000094541	5.9208	2.73717	1.49255	1.83389	0.0666699	0.748228	Gm24089		SELS
ENSMUSG00000111422	1.73392	2.73702	2.7462	0.996657	0.318931	1	1700027J07Rik		SENP2
ENSMUSG00000049929	2.59351	2.73699	2.10634	1.29941	0.193804	0.946422	Lpar4		SERPINA1
ENSMUSG00000035860	0.949802	2.72115	3.29056	0.826956	0.408262	1	Cdhr3		SERPINA2
ENSMUSG00000094632	0.522375	2.72025	5.16936	0.526226	0.598731	1	Gm10310		SERPINA3
ENSMUSG00000050157	8.44636	2.71797	1.91463	1.41958	0.155729	0.911049	Gm867		SERPINB1
ENSMUSG00000063447	0.698607	2.71577	4.86614	0.558096	0.576779	1	Ube2d2b		SERPINE1
ENSMUSG00000104245	0.915604	2.71086	3.91961	0.691616	0.489178	1	Gm38155		SERPINE2
ENSMUSG00000110110	1.21509	2.70772	4.05376	0.667953	0.504164	1	Gm30978		SH3BGRL
ENSMUSG00000014198	4.47756	2.70372	1.10304	2.45116	0.0142398	0.444137	Zfp385c		SKP2
ENSMUSG00000102895	2.11714	2.70128	2.22764	1.21262	0.225275	0.968316	5830415G21Rik		SLC16A1
ENSMUSG00000038209	35853.6	2.69895	1.2788	2.11053	0.0348125	0.615329	Itln1		SLC3A2
ENSMUSG00000101234	1.13469	2.69536	2.75653	0.977809	0.328169	1	1700007E05Rik		SLC6A6
ENSMUSG00000097751	1.85688	2.69484	3.43635	0.784216	0.432914	1	Gm26690		SLFN2
ENSMUSG00000109857	2.21616	2.69389	1.35586	1.98685	0.0469393	0.665894	Gm32817		SNAI1
ENSMUSG00000094124	13.813	2.69315	1.55864	1.72789	0.0840088	0.801971	Ighv1-74		SOD1
ENSMUSG00000104576	4.24582	2.69131	1.34987	1.99375	0.0461794	0.665785	F830115B05Rik		SOD2
ENSMUSG00000070421	7.82989	2.68956	1.18624	2.26731	0.0233715	0.531784	Olfr658		SOX9
ENSMUSG00000110366	2.15805	2.6893	1.88191	1.42903	0.152996	0.909195	Gm45885		SPATA19
ENSMUSG00000106178	1.79624	2.68636	2.70485	0.993162	0.320631	1	Gm42987		SPI1
ENSMUSG00000111003	2.43408	2.68593	1.6685	1.60979	0.107444	0.847056	AC120394.1		SPP1
ENSMUSG00000082398	0.674594	2.68516	5.19074	0.517299	0.604948	1	Gm11927		ST6GAL1
ENSMUSG00000097391	26.5197	2.68461	0.802804	3.34405	0.000825659	0.0954177	Mirg		ST8SIA1
ENSMUSG00000110325	0.765644	2.68357	3.97297	0.675457	0.499385	1	Gm45293		SUPV3L1
ENSMUSG00000081578	0.454297	2.67551	5.19185	0.51533	0.606322	1	Gm12611		SZAT5A
ENSMUSG00000070366	1.23996	2.67434	2.72253	0.982299	0.325952	1	Plpp4		TACR1
ENSMUSG00000074473	0.596079	2.67299	5.05798	0.52847	0.597173	1	A230072I06Rik		TAP1
ENSMUSG00000104486	1.41043	2.67266	2.48805	1.0742	0.282735	0.999801	Gm38066		TAPBP
ENSMUSG00000100415	0.523467	2.67108	5.18814	0.514843	0.606663	1	Gm28089		TCRB
ENSMUSG00000104810	2.94422	2.6706	1.9877	1.34357	0.179089	0.933241	Gm5684		TERT
ENSMUSG00000105148	0.837734	2.66341	3.9126	0.680726	0.496045	1	Gm42700		TFEC
ENSMUSG00000105705	0.518387	2.66234	4.23297	0.628953	0.52938	1	AC174780.1		TFF3
ENSMUSG00000026840	15.6967	2.66092	1.40736	1.89072	0.0586611	0.717497	Lamc3		TFPI2
ENSMUSG00000108545	0.516643	2.65956	5.19356	0.512088	0.60859	1	Gm44613		TGM1
ENSMUSG00000065544	0.811878	2.6539	4.62381	0.573965	0.565992	1	Mir32		THBS1
ENSMUSG00000101621	1.59906	2.65387	2.69021	0.986494	0.323891	1	Gm28905		THBS2
ENSMUSG00000064833	2.71224	2.65093	1.62658	1.62976	0.103152	0.840434	Gm25926		TICAM1
ENSMUSG00000107658	0.762604	2.64777	3.94625	0.670959	0.502247	1	Gm44958		TIFA
ENSMUSG00000087515	1.62274	2.64499	2.08571	1.26815	0.204744	0.956385	Gm13554		TLR9
ENSMUSG00000106534	0.472496	2.64355	4.40512	0.600109	0.548434	1	Gm6366		TNC
ENSMUSG00000104554	6.21037	2.64108	1.70112	1.55255	0.120531	0.866049	Gm4610		TNF
ENSMUSG00000085183	1.01165	2.64066	3.8452	0.686741	0.492246	1	Gm12603		TNFAIP2
ENSMUSG00000020000	4.42272	2.63829	1.59929	1.64967	0.0990104	0.834303	Moxd1		TNFAIP3
ENSMUSG00000111729	1.8733	2.63688	2.02108	1.30469	0.192	0.945062	AC131777.1		TNFRSF4
ENSMUSG00000100776	1.0962	2.63256	2.5231	1.04339	0.29677	1	Gm18254		TNFRSF9
ENSMUSG00000099462	0.49573	2.63204	5.19773	0.506383	0.612588	1	Gm28549		TNFSF10
ENSMUSG00000106149	5.21417	2.62846	1.21536	2.1627	0.0305643	0.588295	Gm43430		TNFSF13B
ENSMUSG00000112412	0.68933	2.62684	4.2173	0.622872	0.533369	1	Gm35239		TNFSF13B
ENSMUSG00000106940	0.918646	2.62662	3.1818	0.825515	0.409079	1	Gm42930		TNFSF15
ENSMUSG00000034645	4.4195	2.62305	0.935015	2.80536	0.00502611	0.27844	Zyg11a		TNFSFRF1B
ENSMUSG00000040732	21.3077	2.62119	1.21018	2.16596	0.0303142	0.587088	Erg		TNIP1
ENSMUSG00000086392	1.84194	2.61771	1.56592	1.67167	0.0945885	0.826983	Mccc1os		TNIP3
ENSMUSG00000109642	0.800536	2.61573	3.47155	0.753477	0.451163	1	Gm45289		TRAF1
ENSMUSG00000040919	0.945262	2.6156	3.00202	0.871282	0.3836	1	4930505A04Rik		TRAF2
ENSMUSG00000104200	0.840843	2.61409	3.36667	0.776463	0.437476	1	Gm37399		TREM1
ENSMUSG00000076923	0.514074	2.61238	5.19358	0.503002	0.614963	1	Traj5		TRP53
ENSMUSG00000084919	0.433557	2.61171	5.19958	0.502293	0.615462	1	Ptprtos		TRPC1
ENSMUSG00000065315	0.769691	2.61142	3.94139	0.662562	0.507611	1	Gm26064		TWIST1
ENSMUSG00000089026	0.922101	2.60977	3.16522	0.824515	0.409647	1	Gm25014		UCP2
ENSMUSG00000094993	1.31665	2.60885	3.62782	0.719124	0.472065	1	Igkv4-51		UGCGL1
ENSMUSG00000088456	0.414574	2.60631	5.17839	0.503305	0.61475	1	Gm26372		UPK1B
ENSMUSG00000001027	16.3448	2.6006	1.69432	1.5349	0.124809	0.870715	Scn4a		UPP1
ENSMUSG00000115283	0.814252	2.59974	2.63772	0.985603	0.324328	1	AC154616.2		VCAM1
ENSMUSG00000065549	0.888127	2.59882	2.83803	0.915714	0.359817	1	Mir200b		VEGFC
ENSMUSG00000039628	1.12497	2.59765	2.98927	0.868991	0.384852	1	Hs3st6		VIM
ENSMUSG00000106073	3.58769	2.59525	1.6086	1.61336	0.106667	0.847056	Gm42892		VPS53
ENSMUSG00000109958	1.8251	2.59384	1.76948	1.46587	0.142682	0.895567	Gm32786		WERVWE1
ENSMUSG00000108378	0.491245	2.59225	5.17735	0.500691	0.616589	1	Gm44641		WNT10B
ENSMUSG00000065347	1.15146	2.59068	1.97418	1.31229	0.189424	0.943031	Gm25583		WT1
ENSMUSG00000108493	4.62147	2.59015	1.46385	1.76941	0.0768253	0.778031	Gm45715		XDH
ENSMUSG00000055555	2.1733	2.58944	1.92977	1.34184	0.179649	0.93355	4930502E18Rik		XIAP
ENSMUSG00000094877	0.898173	2.58797	3.94231	0.65646	0.511528	1	Trav3n-3		YY1
ENSMUSG00000099841	0.431903	2.58369	5.20037	0.496827	0.619311	1	Gm28855		ZNF366
ENSMUSG00000090709	5.02103	2.58226	1.34638	1.91792	0.0551207	0.698372	Gm17173
ENSMUSG00000076912	0.472931	2.5822	5.19034	0.497501	0.618836	1	Traj17
ENSMUSG00000099267	3.63691	2.57919	1.61221	1.59978	0.109647	0.850339	Mir6955
ENSMUSG00000035594	2.26943	2.56905	1.7841	1.43997	0.149876	0.905749	Chrna5
ENSMUSG00000102917	4.8721	2.56875	1.18501	2.1677	0.0301813	0.586435	Gm37724
ENSMUSG00000087475	1.82041	2.56617	2.59093	0.990445	0.321957	1	4933406I18Rik
ENSMUSG00000098515	2.0923	2.56612	3.30573	0.776263	0.437594	1	Gm27195
ENSMUSG00000027676	2.50523	2.56587	1.81738	1.41185	0.157995	0.913194	Ccdc39
ENSMUSG00000083242	1.54356	2.56094	2.05752	1.24467	0.213252	0.962496	Gm15659
ENSMUSG00000093739	0.795052	2.56083	3.31438	0.772641	0.439735	1	Gm20692
ENSMUSG00000110936	0.499347	2.56063	5.1902	0.493357	0.62176	1	Gm19212
ENSMUSG00000088705	1.10692	2.56048	3.62974	0.705417	0.48055	1	Gm25549
ENSMUSG00000104413	0.902812	2.55788	2.68864	0.951367	0.341418	1	Gm37065
ENSMUSG00000100302	1.47428	2.55671	2.41124	1.06033	0.288996	1	Gm29670
ENSMUSG00000103301	0.564091	2.55671	5.2018	0.491503	0.62307	1	Gm37804
ENSMUSG00000113951	1.75059	2.55373	2.09738	1.21758	0.223383	0.968127	Gm2001
ENSMUSG00000110416	0.579566	2.5536	4.13938	0.616905	0.537297	1	Gm19248
ENSMUSG00000086272	2.01135	2.54989	1.95172	1.30648	0.191389	0.944963	BC039966
ENSMUSG00000097206	3.75165	2.54987	1.39947	1.82202	0.0684513	0.753934	Gm26699
ENSMUSG00000112423	0.726447	2.54733	3.55728	0.71609	0.473936	1	Gm6333
ENSMUSG00000115044	1.04216	2.54596	2.44779	1.04011	0.298289	1	CT573086.2
ENSMUSG00000046272	1.22672	2.54546	4.3748	0.581846	0.56067	1	Olfr1444
ENSMUSG00000064489	1.89911	2.54529	1.77475	1.43417	0.151525	0.906962	Gm23296
ENSMUSG00000064542	3.96784	2.54495	1.07587	2.36548	0.0180069	0.488012	Gm22980
ENSMUSG00000044377	7.27026	2.5439	0.923088	2.75586	0.00585383	0.304043	Gm13080
ENSMUSG00000110205	1.072	2.54378	3.06597	0.829683	0.406718	1	Gm33594
ENSMUSG00000093969	0.560931	2.54112	4.15364	0.611782	0.540682	1	Trav4n-4
ENSMUSG00000101880	1.01877	2.53441	2.60007	0.974747	0.329686	1	Gm29282
ENSMUSG00000079008	0.428752	2.5334	5.17669	0.489387	0.624568	1	Gm14124
ENSMUSG00000115537	2.81592	2.52979	1.38375	1.82821	0.0675188	0.751984	AC137871.3
ENSMUSG00000113011	1.57861	2.52912	2.96652	0.852555	0.393906	1	Gm1995
ENSMUSG00000114141	2.45133	2.52911	1.87799	1.34671	0.178074	0.931461	Gm34215
ENSMUSG00000111436	1.18455	2.52904	1.89934	1.33153	0.183014	0.938151	AC158598.1
ENSMUSG00000114355	2.99698	2.52859	1.63413	1.54736	0.121776	0.868284	CT009713.2
ENSMUSG00000108169	2.28886	2.52681	1.63456	1.54587	0.122137	0.868284	Gm43958
ENSMUSG00000034990	0.891565	2.52625	2.48728	1.01567	0.309787	1	Otoa
ENSMUSG00000108563	0.732114	2.51723	3.36692	0.747635	0.454681	1	Gm44686
ENSMUSG00000020734	0.913768	2.51329	3.38625	0.742203	0.457964	1	Grin2c
ENSMUSG00000065431	2.922	2.51157	1.26393	1.98711	0.04691	0.665894	Mir186
ENSMUSG00000082357	1.74091	2.51155	1.86124	1.3494	0.177209	0.930324	Gm13542
ENSMUSG00000023918	4.58463	2.50642	1.85466	1.35142	0.176561	0.929827	Adgrf4
ENSMUSG00000109863	0.702363	2.50594	5.15802	0.485835	0.627084	1	Gm45643
ENSMUSG00000107216	1.46909	2.50427	2.57315	0.973228	0.33044	1	2210412B16Rik
ENSMUSG00000084422	6.87897	2.50337	1.03704	2.41397	0.0157799	0.464955	Gm25108
ENSMUSG00000105412	1.03964	2.50194	2.68397	0.93218	0.351244	1	Gm43768
ENSMUSG00000095723	5.48937	2.50031	1.49404	1.67352	0.0942242	0.826331	Gm23647
ENSMUSG00000076576	172.297	2.50014	1.26084	1.98291	0.0473776	0.666643	Igkv6-32
ENSMUSG00000102654	8.54815	2.49636	1.59209	1.56798	0.116886	0.858925	Ighv1-21
ENSMUSG00000093467	1.89441	2.49531	2.95635	0.84405	0.398642	1	Gm20659
ENSMUSG00000108266	2.20976	2.49513	1.47983	1.68609	0.0917777	0.819232	Gm5305
ENSMUSG00000083157	0.934349	2.49358	2.80693	0.888366	0.374344	1	Gm13511
ENSMUSG00000078144	9.30936	2.49285	0.924429	2.69664	0.00700439	0.333631	Capns2
ENSMUSG00000087915	1.08654	2.4928	3.24976	0.767071	0.443039	1	Gm24909
ENSMUSG00000113771	1.14096	2.49245	4.61889	0.53962	0.589459	1	Gm36529
ENSMUSG00000080530	2.74871	2.49222	1.657	1.50406	0.132567	0.882351	Gm25540
ENSMUSG00000035355	0.841971	2.49053	3.91555	0.636061	0.524737	1	Kcnh4
ENSMUSG00000102147	0.685552	2.48939	4.01084	0.620667	0.534819	1	Gm38055
ENSMUSG00000112977	1.7231	2.48906	2.19449	1.13423	0.256697	0.985242	Gm34081
ENSMUSG00000111950	0.441045	2.48877	5.18326	0.480155	0.631117	1	AC101677.2
ENSMUSG00000084885	1.12151	2.48857	3.07041	0.810502	0.417652	1	3010001F23Rik
ENSMUSG00000102732	1.65321	2.48821	4.12644	0.602992	0.546514	1	Gm37342
ENSMUSG00000110499	1.23189	2.48593	2.65281	0.937095	0.34871	1	Gm45873
ENSMUSG00000097308	0.439405	2.48498	3.78365	0.656768	0.51133	1	Gm6410
ENSMUSG00000003436	10.9565	2.4837	0.855915	2.90181	0.00371018	0.241616	Dll3
ENSMUSG00000096825	2.88995	2.48267	1.39171	1.78391	0.074439	0.774963	Trav12-1
ENSMUSG00000023140	131.829	2.482	1.55145	1.5998	0.109644	0.850339	Reg2
ENSMUSG00000041771	1.19078	2.48181	3.58722	0.691847	0.489033	1	Slc24a4
ENSMUSG00000020566	0.976036	2.47999	3.8682	0.641123	0.521443	1	Atp6v1c2
ENSMUSG00000102504	3.55068	2.4799	2.28983	1.08301	0.278804	0.998762	Gm21955
ENSMUSG00000097546	1.65124	2.47753	2.57386	0.962575	0.335761	1	Gm26749
ENSMUSG00000052613	1.27602	2.47721	2.65198	0.934096	0.350254	1	Pcdh15
ENSMUSG00000110167	1.18611	2.47638	3.31004	0.748141	0.454375	1	Gm45532
ENSMUSG00000052316	1.81431	2.47598	3.90657	0.633799	0.526212	1	Lrrc15
ENSMUSG00000103200	1.63958	2.47003	1.47019	1.68008	0.0929426	0.821598	Gm37328
ENSMUSG00000097111	2.26469	2.46951	1.7215	1.43451	0.151427	0.906962	Peak1os
ENSMUSG00000110315	3.64883	2.46911	1.53199	1.61171	0.107026	0.847056	Gm8423
ENSMUSG00000079011	1.59087	2.46748	1.57974	1.56196	0.118299	0.861646	Gm11033
ENSMUSG00000104315	2.80699	2.46426	1.44669	1.70337	0.0884983	0.811537	Gm37906
ENSMUSG00000105908	0.658464	2.46056	4.95839	0.496241	0.619725	1	Mir6920
ENSMUSG00000084711	0.713231	2.46026	3.9509	0.622708	0.533476	1	Gm24629
ENSMUSG00000103911	0.49173	2.45871	5.19701	0.473101	0.636141	1	Gm38074
ENSMUSG00000109383	0.866949	2.45866	3.99867	0.614868	0.538642	1	Gm36584
ENSMUSG00000079180	25749.5	2.45744	0.776405	3.16516	0.00154998	0.143654	Mptx2
ENSMUSG00000080478	1.52007	2.45537	1.82761	1.34349	0.179114	0.933241	Snord23
ENSMUSG00000097719	1.25862	2.45361	1.59335	1.53991	0.123582	0.868284	Rpl31-ps18
ENSMUSG00000108129	4.3854	2.45287	1.47876	1.65873	0.0971705	0.831315	4930417O13Rik
ENSMUSG00000077394	2.86576	2.44783	1.43507	1.70572	0.0880595	0.809905	Gm24339
ENSMUSG00000090968	0.911386	2.44782	2.24702	1.08936	0.275995	0.997116	Gm3978
ENSMUSG00000026531	23710.5	2.44488	0.799162	3.05931	0.0022185	0.18028	Mptx1
ENSMUSG00000093953	0.813581	2.44473	4.04248	0.60476	0.545339	1	Trav3d-3
ENSMUSG00000086862	7.92915	2.43812	1.41835	1.71899	0.0856167	0.805276	Gm13546
ENSMUSG00000073377	0.754481	2.4365	5.1625	0.471961	0.636955	1	AU016765
ENSMUSG00000085298	1.12453	2.43649	4.34858	0.560296	0.575277	1	F730035M05Rik
ENSMUSG00000085768	0.798483	2.43618	3.91621	0.622075	0.533892	1	Gm13707
ENSMUSG00000105217	1.70638	2.43334	2.2047	1.1037	0.269722	0.991686	Gm42873
ENSMUSG00000104706	1.75772	2.42538	1.55957	1.55516	0.119907	0.864409	Gm43421
ENSMUSG00000103087	1.33059	2.42432	2.08206	1.16438	0.244269	0.981548	Gm38122
ENSMUSG00000039154	3.19205	2.42411	2.46726	0.98251	0.325849	1	Shd
ENSMUSG00000107745	0.946478	2.42353	2.69492	0.899297	0.368494	1	Gm43917
ENSMUSG00000033475	0.899411	2.42271	2.92747	0.827578	0.40791	1	Tomm6
ENSMUSG00000053117	1.86472	2.42034	3.07678	0.786648	0.431488	1	E330013P04Rik
ENSMUSG00000100914	1.77671	2.4203	1.85054	1.30789	0.190911	0.944441	Gm28679
ENSMUSG00000092683	1.37756	2.4188	5.04807	0.479154	0.631829	1	Gm25747
ENSMUSG00000055312	0.778534	2.41752	4.85155	0.498299	0.618273	1	Them7
ENSMUSG00000113495	0.98481	2.4166	2.32333	1.04015	0.298272	1	Gm19792
ENSMUSG00000081602	1.11736	2.41569	3.42453	0.705407	0.480557	1	Gm15369
ENSMUSG00000061080	1.11022	2.41389	4.32059	0.558695	0.57637	1	Lsamp
ENSMUSG00000081745	0.617989	2.40991	5.12698	0.470044	0.638324	1	Gm15549
ENSMUSG00000109902	0.690153	2.40915	4.95572	0.486134	0.626872	1	Gm45693
ENSMUSG00000107305	0.591678	2.40651	4.16712	0.577499	0.563603	1	Gm43262
ENSMUSG00000095798	0.748444	2.40374	4.86793	0.493791	0.621454	1	Gm26298
ENSMUSG00000109154	1.69805	2.40354	2.15218	1.11679	0.264083	0.989801	Gm44822
ENSMUSG00000041449	6.5214	2.3956	1.521	1.57502	0.115252	0.857343	Serpina3h
ENSMUSG00000093695	0.791036	2.39448	3.88196	0.616821	0.537353	1	Gm20717
ENSMUSG00000101628	0.811946	2.39384	4.72537	0.506593	0.61244	1	Gm28177
ENSMUSG00000113603	3.09728	2.39221	1.52094	1.57285	0.115753	0.857343	CT030159.1
ENSMUSG00000017344	12.3699	2.3921	1.36599	1.75118	0.0799152	0.78847	Vtn
ENSMUSG00000099836	0.618279	2.39129	4.12653	0.57949	0.562258	1	Gm29204
ENSMUSG00000065551	1.93169	2.39081	1.57424	1.51871	0.128835	0.874936	Mir210
ENSMUSG00000075025	3.64457	2.39038	1.70524	1.40179	0.160979	0.917241	Gm10804
ENSMUSG00000074595	2.23633	2.38888	1.65821	1.44063	0.149688	0.905633	Wfdc6a
ENSMUSG00000089759	0.69014	2.38797	3.96908	0.601642	0.547412	1	3632454L22Rik
ENSMUSG00000109127	1.19655	2.38741	3.57352	0.668083	0.50408	1	Gm31135
ENSMUSG00000082313	3.02904	2.38697	1.17687	2.02824	0.042536	0.649394	Gm11701
ENSMUSG00000048528	0.468835	2.38411	5.17113	0.461043	0.644768	1	Nkx1-2
ENSMUSG00000111355	0.435869	2.3835	5.20381	0.45803	0.646931	1	Gm8911
ENSMUSG00000058119	4.09069	2.38347	5.11135	0.46631	0.640994	1	Gm5771
ENSMUSG00000103462	0.956897	2.3827	2.07408	1.1488	0.25064	0.983117	Gm32181
ENSMUSG00000097215	1.00998	2.38084	3.83509	0.620805	0.534728	1	Gm26550
ENSMUSG00000026919	7.87902	2.38048	1.3824	1.72199	0.0850713	0.803632	Lcn4
ENSMUSG00000048752	0.498537	2.38043	5.18456	0.459138	0.646135	1	Prss50
ENSMUSG00000076512	34.3841	2.38016	1.59712	1.49028	0.136151	0.888083	Igkv9-123
ENSMUSG00000086442	2.25925	2.37688	1.72208	1.38024	0.167514	0.919983	Gm11722
ENSMUSG00000084154	2.89552	2.37432	1.55158	1.53025	0.125954	0.873129	Gm15644
ENSMUSG00000101447	2.49829	2.36925	1.38557	1.70995	0.0872754	0.807967	Gm28826
ENSMUSG00000078757	2.9004	2.36864	1.74024	1.3611	0.173483	0.927243	Scgb1b29
ENSMUSG00000076831	0.831943	2.3685	4.62674	0.511916	0.608709	1	Trav8-1
ENSMUSG00000083215	2.25845	2.36816	1.98662	1.19206	0.23324	0.974498	Rbmx2-ps
ENSMUSG00000106478	10.4877	2.36779	1.26786	1.86755	0.0618244	0.729119	Gm36551
ENSMUSG00000109216	2.2193	2.36627	2.07349	1.1412	0.253786	0.983199	Gm44907
ENSMUSG00000102286	3.9956	2.36327	1.16198	2.03383	0.0419684	0.648582	Gm37004
ENSMUSG00000112264	3.17381	2.36307	1.25956	1.87611	0.06064	0.721024	AC153365.1
ENSMUSG00000064495	2.33331	2.36147	1.70481	1.38518	0.165999	0.919214	Gm24313
ENSMUSG00000097862	1.41842	2.35956	1.8273	1.29128	0.196605	0.94906	Gm26859
ENSMUSG00000113135	1.32785	2.35792	5.09319	0.462955	0.643397	1	AC116589.2
ENSMUSG00000110060	6.5394	2.35516	1.22473	1.92301	0.0544787	0.696873	Gm9860
ENSMUSG00000101166	0.492822	2.35302	5.20625	0.451961	0.651297	1	Gm28496
ENSMUSG00000082103	0.554466	2.35273	5.18544	0.453719	0.650031	1	Gm15320
ENSMUSG00000102830	0.772101	2.35065	5.19231	0.452717	0.650753	1	Gm37012
ENSMUSG00000066158	2.7651	2.35017	1.27834	1.83846	0.0659949	0.744966	AY512931
ENSMUSG00000063911	0.809722	2.34931	3.86984	0.607082	0.543797	1	Tdgf1-ps2
ENSMUSG00000024682	1.33585	2.34908	2.32885	1.00869	0.313125	1	Gif
ENSMUSG00000085657	0.819724	2.34709	2.60112	0.902336	0.366878	1	Gm15984
ENSMUSG00000104114	0.950868	2.34279	3.19294	0.733742	0.463106	1	Gm37297
ENSMUSG00000112033	4.83172	2.34216	1.6319	1.43524	0.15122	0.906962	AC125020.2
ENSMUSG00000074676	4.38541	2.34103	1.9822	1.18102	0.237593	0.976608	Foxs1
ENSMUSG00000070225	0.989467	2.34068	3.70247	0.632194	0.52726	1	n-R5s33
ENSMUSG00000094914	1.24187	2.34057	2.25087	1.03985	0.298409	1	Trav9d-2
ENSMUSG00000078759	3.1243	2.33961	1.80806	1.29399	0.19567	0.9484	Scgb1b7
ENSMUSG00000090607	3.12042	2.3396	1.84987	1.26473	0.205967	0.956385	Gm17052
ENSMUSG00000039661	2.73633	2.33932	1.81323	1.29014	0.197002	0.949364	Dusp26
ENSMUSG00000044306	2.77294	2.339	1.21146	1.93073	0.0535162	0.694774	4930500M09Rik
ENSMUSG00000110599	0.792312	2.33833	2.86299	0.816743	0.414075	1	6030466F02Rik
ENSMUSG00000107604	3.89697	2.33831	1.01879	2.29518	0.0217227	0.513872	Gm44041
ENSMUSG00000017300	1.09845	2.33791	2.48712	0.940007	0.347214	1	Tnnc2
ENSMUSG00000094779	3.24455	2.33766	2.08612	1.12058	0.262467	0.989311	Trav13n-2
ENSMUSG00000052403	7.76652	2.33668	1.02225	2.28582	0.022265	0.518257	Fcnaos
ENSMUSG00000113483	1.49	2.3354	2.05238	1.1379	0.255162	0.984277	AC154816.2
ENSMUSG00000038491	1.08175	2.33483	2.44487	0.954992	0.339582	1	Cdk19os
ENSMUSG00000105160	7.32273	2.33294	1.71229	1.36247	0.17305	0.927243	A530030E21Rik
ENSMUSG00000102856	6.58033	2.33248	1.44943	1.60924	0.107564	0.847056	Gm37084
ENSMUSG00000051804	1.13646	2.33059	3.08497	0.755464	0.449971	1	Adam6b
ENSMUSG00000037362	1778.99	2.33028	0.919282	2.53489	0.0112483	0.407162	Nov
ENSMUSG00000095445	0.609994	2.33016	4.05519	0.574611	0.565554	1	H2al1i
ENSMUSG00000045010	20.9958	2.32635	2.61652	0.8891	0.373949	1	Gm4779
ENSMUSG00000085326	1.18548	2.32594	5.19593	0.447647	0.654408	1	Gm15642
ENSMUSG00000092509	1.79341	2.32492	2.00084	1.16197	0.245247	0.981548	Gm20394
ENSMUSG00000028222	4.96867	2.32482	1.29076	1.80113	0.0716826	0.767099	Calb1
ENSMUSG00000106169	3.43818	2.3231	1.49112	1.55796	0.119244	0.863492	Mir6948
ENSMUSG00000104852	8.29471	2.32248	0.920036	2.52434	0.0115917	0.412103	Gm43201
ENSMUSG00000106837	1.32556	2.31616	2.92692	0.79133	0.428751	1	D630030B08Rik
ENSMUSG00000083906	3.96274	2.31504	1.55241	1.49126	0.135894	0.887432	Gm15186
ENSMUSG00000079852	4.27439	2.31483	1.6028	1.44425	0.14867	0.904936	Klra4
ENSMUSG00000086527	0.745665	2.31407	4.10866	0.563219	0.573286	1	Gm15856
ENSMUSG00000115617	0.827787	2.31351	2.65615	0.871001	0.383753	1	AC123665.5
ENSMUSG00000112365	1.1031	2.31206	2.20269	1.04966	0.293876	1	AC117232.3
ENSMUSG00000094452	0.898421	2.312	2.88636	0.801008	0.423127	1	Gm22623
ENSMUSG00000067220	3.07133	2.31126	1.63254	1.41575	0.15685	0.913056	Cnga1
ENSMUSG00000113792	4.13888	2.31072	1.279	1.80666	0.0708147	0.76215	Gm10933
ENSMUSG00000043670	2.63638	2.30967	1.47916	1.56148	0.118411	0.862111	Diras1
ENSMUSG00000031125	31.4613	2.30865	1.31622	1.754	0.07943	0.787264	3830403N18Rik
ENSMUSG00000100425	0.843767	2.30857	2.81042	0.821434	0.411399	1	Gm29131
ENSMUSG00000096074	4.08863	2.30809	1.68002	1.37385	0.16949	0.921927	Ighv1-72
ENSMUSG00000030209	5.27807	2.30735	2.25649	1.02254	0.306526	1	Grin2b
ENSMUSG00000097619	0.743743	2.30566	4.83119	0.477245	0.633187	1	4833422M21Rik
ENSMUSG00000086594	1.44516	2.30501	2.46142	0.936455	0.349039	1	Nudt12os
ENSMUSG00000099663	4.22194	2.30479	1.37801	1.67255	0.0944158	0.826832	Gm29201
ENSMUSG00000109482	1.26401	2.30324	2.71334	0.848857	0.395961	1	Gm4756
ENSMUSG00000085304	0.857391	2.30035	2.88079	0.798516	0.424571	1	Gm12802
ENSMUSG00000087037	1.1233	2.29866	3.23817	0.709865	0.477788	1	4930432L08Rik
ENSMUSG00000085872	1.09201	2.29424	2.24905	1.02009	0.307686	1	Gm11505
ENSMUSG00000079053	3.70155	2.29382	1.10184	2.08182	0.0373593	0.628555	Gm14010
ENSMUSG00000054477	1.12042	2.29197	4.37834	0.523479	0.600641	1	Kcnn2
ENSMUSG00000094270	5.03439	2.28906	1.83294	1.24885	0.211721	0.962134	Gm22291
ENSMUSG00000020354	7.24412	2.28836	1.55555	1.4711	0.141265	0.89414	Sgcd
ENSMUSG00000100775	1.44945	2.28736	2.81436	0.812746	0.416364	1	Gm29107
ENSMUSG00000042474	186.917	2.28674	1.43209	1.59679	0.110312	0.851255	Fcmr
ENSMUSG00000096175	2.47506	2.28526	1.90098	1.20215	0.229305	0.970272	Gm21761
ENSMUSG00000103251	5.4632	2.28254	1.39711	1.63376	0.102308	0.839808	Gm37519
ENSMUSG00000087801	1.89985	2.28222	1.97536	1.15535	0.247949	0.982589	Gm25980
ENSMUSG00000100392	1.71405	2.28221	2.66015	0.857926	0.390933	1	Gm28935
ENSMUSG00000096879	0.59624	2.28112	3.07918	0.74082	0.458802	1	Gm4858
ENSMUSG00000082902	3.66826	2.2776	2.52967	0.900353	0.367932	1	Ccl19-ps1
ENSMUSG00000025013	0.996149	2.27742	3.61872	0.629346	0.529123	1	Tll2
ENSMUSG00000104830	5.32978	2.2767	1.36573	1.66702	0.0955099	0.828908	5830487J09Rik
ENSMUSG00000105496	1.35428	2.27441	2.40722	0.944826	0.344748	1	Mir7004
ENSMUSG00000105774	4.03774	2.27302	1.29971	1.74887	0.0803127	0.78963	Gm43006
ENSMUSG00000108693	0.84382	2.27271	4.58544	0.495637	0.62015	1	Gm45153
ENSMUSG00000095272	3.95213	2.27217	1.21869	1.86443	0.062261	0.73182	Gm24242
ENSMUSG00000104039	1.49307	2.26759	2.41706	0.93816	0.348162	1	Gm37772
ENSMUSG00000107263	1.73428	2.26744	2.44655	0.926792	0.354034	1	Gm42471
ENSMUSG00000099930	5.02226	2.26732	2.2236	1.01966	0.307889	1	Gm2396
ENSMUSG00000077497	0.805963	2.26533	3.91445	0.578709	0.562786	1	Gm23593
ENSMUSG00000089475	2.0598	2.26481	1.61606	1.40144	0.161084	0.917241	Gm25363
ENSMUSG00000091091	0.875445	2.26102	2.87046	0.787686	0.43088	1	Kcnmb3
ENSMUSG00000101745	0.465713	2.25592	5.20582	0.433346	0.664764	1	Gm28764
ENSMUSG00000099773	2.93605	2.25287	1.84519	1.22094	0.222109	0.968127	Hmgb1-rs16
ENSMUSG00000103811	2.71963	2.25004	1.75508	1.28202	0.199837	0.951105	Gm38004
ENSMUSG00000106379	1.15954	2.24784	2.74804	0.817977	0.41337	1	Lhfpl3
ENSMUSG00000086241	1.74851	2.24632	3.0562	0.735005	0.462336	1	4930483K19Rik
ENSMUSG00000083505	3.31248	2.24257	1.19124	1.88255	0.0597609	0.719572	Gm7541
ENSMUSG00000102335	0.480607	2.24186	5.2088	0.4304	0.666905	1	Gm37231
ENSMUSG00000085967	2.67468	2.24172	1.39556	1.60633	0.108201	0.847845	Gm12530
ENSMUSG00000047220	8.57779	2.24101	1.1675	1.91949	0.0549223	0.697927	Ccdc36
ENSMUSG00000097076	2.23854	2.24088	3.33084	0.672769	0.501094	1	Platr7
ENSMUSG00000106698	2.56644	2.23801	1.55243	1.44162	0.14941	0.905058	Gm43599
ENSMUSG00000111052	6.87164	2.23737	1.23238	1.81549	0.0694487	0.756983	Gm20139
ENSMUSG00000065421	0.638589	2.23638	5.09288	0.439118	0.660576	1	Mirlet7a-1
ENSMUSG00000055523	1.93776	2.2343	2.04049	1.09499	0.273523	0.994454	Gucy2g
ENSMUSG00000097136	1.67308	2.23364	4.00603	0.557569	0.577139	1	Gm26772
ENSMUSG00000051497	34.299	2.23228	0.939325	2.37648	0.0174788	0.482929	Kcnj16
ENSMUSG00000088171	3.13773	2.2322	1.53199	1.45705	0.145101	0.900655	Gm25220
ENSMUSG00000089965	0.700549	2.23198	5.20246	0.429024	0.667906	1	Gm16236
ENSMUSG00000062329	14.8715	2.23104	1.70697	1.30702	0.191207	0.944804	Cytl1
ENSMUSG00000109253	0.474963	2.23091	5.17505	0.431089	0.666404	1	Gm4536
ENSMUSG00000113385	2.36522	2.22849	1.34973	1.65107	0.0987244	0.833483	AC101875.1
ENSMUSG00000108092	0.542379	2.22552	5.21307	0.426912	0.669444	1	Gm44189
ENSMUSG00000115072	1.9168	2.22375	3.71702	0.598261	0.549666	1	Vmn1r2
ENSMUSG00000048655	0.561049	2.22261	4.13359	0.537694	0.590788	1	Ccdc169
ENSMUSG00000079550	1.19239	2.22097	1.96823	1.12841	0.259147	0.985888	Mpp4
ENSMUSG00000113489	1.65227	2.2197	2.12616	1.04399	0.296488	1	Gm16381
ENSMUSG00000091114	1.67241	2.21927	1.52319	1.45699	0.145118	0.900655	Gm3138
ENSMUSG00000054641	82.4264	2.21916	0.73123	3.03483	0.00240672	0.187846	Mmrn1
ENSMUSG00000069441	0.528479	2.21395	4.34192	0.5099	0.610122	1	Dsg1a
ENSMUSG00000031302	1.61112	2.21352	2.32333	0.952733	0.340725	1	Nlgn3
ENSMUSG00000093838	15.1388	2.21295	1.40701	1.57281	0.115763	0.857343	Ighv3-1
ENSMUSG00000113183	1.04966	2.21288	2.40236	0.921129	0.356983	1	AC153143.1
ENSMUSG00000082743	1.46604	2.21198	1.87869	1.17741	0.239033	0.978458	Gm12988
ENSMUSG00000114382	1.62331	2.2118	1.98259	1.11561	0.264588	0.99036	AC130217.1
ENSMUSG00000076533	25.7559	2.20934	1.54628	1.42881	0.153059	0.909195	Igkv4-90
ENSMUSG00000068506	30.933	2.20926	0.800105	2.76121	0.00575873	0.302392	Gm5800
ENSMUSG00000103907	1.66207	2.20838	2.39276	0.922942	0.356038	1	Gm37498
ENSMUSG00000094189	1.05446	2.20642	2.8157	0.783611	0.433268	1	Gm6134
ENSMUSG00000049336	0.574594	2.20608	5.18264	0.425667	0.67035	1	Tenm2
ENSMUSG00000109002	1.50272	2.20549	2.31027	0.954645	0.339757	1	Gm38405
ENSMUSG00000062028	16.2975	2.20194	1.16279	1.89366	0.0582702	0.71721	Irgc1
ENSMUSG00000103723	2.01786	2.20133	1.79858	1.22393	0.220979	0.968127	Gm37095
ENSMUSG00000087395	1.78451	2.20076	1.95122	1.12789	0.259368	0.985888	Gm12705
ENSMUSG00000064565	1.29276	2.20024	1.87488	1.17354	0.240581	0.979345	Gm24145
ENSMUSG00000063632	0.567206	2.19964	5.20709	0.422432	0.67271	1	Sox11
ENSMUSG00000071005	5.54984	2.19936	1.78273	1.2337	0.217313	0.9644	Ccl19
ENSMUSG00000070166	1.35285	2.19912	2.5588	0.859435	0.3901	1	Gm25821
ENSMUSG00000083518	0.491739	2.19519	5.21811	0.420687	0.673983	1	Gm9429
ENSMUSG00000102331	16.2674	2.19444	0.787298	2.7873	0.00531486	0.287655	Gm19938
ENSMUSG00000080711	4.53878	2.19415	1.13835	1.92749	0.0539186	0.695621	Gm11686
ENSMUSG00000108737	3.09197	2.19321	1.47765	1.48426	0.13774	0.888895	BC060293
ENSMUSG00000071519	15.9179	2.19302	4.50472	0.486826	0.626382	1	Prss3
ENSMUSG00000095584	0.958755	2.19231	3.43628	0.63799	0.52348	1	Gm22628
ENSMUSG00000103252	0.492432	2.19219	4.28423	0.511689	0.608868	1	Gm37521
ENSMUSG00000099707	0.444125	2.19133	5.19165	0.422088	0.672961	1	Gm8883
ENSMUSG00000114113	5.19221	2.19051	1.02314	2.14095	0.0322777	0.597222	AC131759.1
ENSMUSG00000056821	2.45811	2.19008	1.7347	1.26252	0.206763	0.957064	1700028I16Rik
ENSMUSG00000092267	4.38628	2.18953	1.2048	1.81735	0.069164	0.756897	Gm20417
ENSMUSG00000071294	2.7182	2.18923	1.40539	1.55774	0.119295	0.863644	Cbx3-ps4
ENSMUSG00000103720	3.72655	2.18824	1.50793	1.45116	0.146736	0.901973	Gm37094
ENSMUSG00000050671	0.798688	2.18518	3.52101	0.620611	0.534856	1	Ism2
ENSMUSG00000103869	2.99951	2.18496	1.38803	1.57415	0.115453	0.857343	Gm37420
ENSMUSG00000082076	0.997791	2.18491	2.34858	0.930311	0.35221	1	Gm8659
ENSMUSG00000048775	0.42568	2.18471	5.20765	0.419519	0.674837	1	Serpinb13
ENSMUSG00000097007	1.90265	2.18401	1.74099	1.25446	0.209673	0.9598	4930432B10Rik
ENSMUSG00000025091	1517.92	2.1834	0.92038	2.37228	0.0176788	0.484796	Pnliprp2
ENSMUSG00000082658	2.08193	2.17979	1.84904	1.17888	0.238448	0.977296	Fau-ps2
ENSMUSG00000079076	0.730878	2.17812	4.91561	0.443102	0.657692	1	Gm3086
ENSMUSG00000066009	1.4977	2.17776	2.34167	0.930001	0.35237	1	Zfp987
ENSMUSG00000076535	48.072	2.17775	1.67078	1.30343	0.192427	0.945365	Igkv1-88
ENSMUSG00000047363	2.73307	2.17538	1.48423	1.46566	0.14274	0.895567	Cstad
ENSMUSG00000113359	0.979131	2.17503	2.80741	0.774749	0.438488	1	AC159263.1
ENSMUSG00000105146	0.609834	2.17317	4.07811	0.532886	0.594113	1	Gm35409
ENSMUSG00000020020	2.21094	2.17209	2.14086	1.01459	0.310301	1	Usp44
ENSMUSG00000108126	0.73971	2.16908	4.83467	0.448651	0.653684	1	Gm43909
ENSMUSG00000102415	3.22533	2.16651	1.48076	1.46311	0.143437	0.897016	A430110C17Rik
ENSMUSG00000090128	0.821945	2.16531	4.80265	0.450857	0.652093	1	Gm16038
ENSMUSG00000106432	1.44623	2.16527	3.00396	0.720804	0.47103	1	Gm43259
ENSMUSG00000082342	0.554122	2.16484	5.07628	0.426461	0.669772	1	Gm5395
ENSMUSG00000112323	0.948966	2.16042	2.17091	0.995171	0.319653	1	Gm32828
ENSMUSG00000111632	1.48826	2.15877	3.60654	0.59857	0.54946	1	AC148328.2
ENSMUSG00000076499	8.2694	2.15842	1.01957	2.11699	0.0342605	0.612993	Trbv31
ENSMUSG00000078504	0.683935	2.1575	3.36785	0.640618	0.521771	1	Gm438
ENSMUSG00000098922	0.529189	2.15678	5.15058	0.418746	0.675402	1	Mir8106
ENSMUSG00000036964	3.21064	2.1559	1.30858	1.6475	0.0994544	0.834303	Trim17
ENSMUSG00000087035	0.458037	2.15569	5.21993	0.412974	0.679626	1	Tmem74bos
ENSMUSG00000030324	2.23836	2.15486	1.62481	1.32622	0.184766	0.940268	Rho
ENSMUSG00000031494	3.24405	2.15206	1.24656	1.7264	0.084275	0.802442	Cd209a
ENSMUSG00000005540	90.5215	2.15103	1.48125	1.45217	0.146453	0.901973	Fcer2a
ENSMUSG00000085428	1.41578	2.15093	1.95178	1.10204	0.270446	0.991909	Gm14344
ENSMUSG00000109998	1.30198	2.15074	1.90867	1.12682	0.259817	0.986111	Gm45437
ENSMUSG00000085206	1.50684	2.15066	1.89664	1.13393	0.256824	0.985242	Gm13380
ENSMUSG00000108640	0.420027	2.14811	5.21741	0.41172	0.680545	1	Gm44508
ENSMUSG00000113349	1.85504	2.14715	1.92081	1.11784	0.263636	0.989754	AC132336.1
ENSMUSG00000083016	2.44863	2.14638	1.29194	1.66136	0.0966406	0.83036	Gm12618
ENSMUSG00000103162	0.827981	2.14468	4.71887	0.454491	0.649475	1	Gm38147
ENSMUSG00000085223	2.48618	2.14222	1.56806	1.36616	0.171887	0.924443	Gm11210
ENSMUSG00000086501	6.74393	2.1407	1.46069	1.46554	0.142773	0.895567	4930597A21Rik
ENSMUSG00000106518	2.25792	2.13939	2.14652	0.99668	0.31892	1	Gm42759
ENSMUSG00000100823	0.409589	2.137	5.18852	0.411871	0.680434	1	Gm28704
ENSMUSG00000030638	11.3182	2.13686	1.34383	1.59012	0.111807	0.852782	Sh3gl3
ENSMUSG00000088332	0.798566	2.13468	3.29536	0.647785	0.517124	1	Gm22847
ENSMUSG00000065304	1.17199	2.13418	2.17051	0.983264	0.325478	1	Gm23245
ENSMUSG00000091933	1.0944	2.13402	2.37699	0.897785	0.3693	1	Gm8857
ENSMUSG00000096846	1.98286	2.13369	1.9012	1.12229	0.261741	0.988522	Gm8890
ENSMUSG00000041245	1.12066	2.13229	3.18322	0.669854	0.502951	1	Wnk3
ENSMUSG00000085417	1.3312	2.13039	2.77556	0.767554	0.442752	1	Gm13919
ENSMUSG00000030359	6.83082	2.12996	3.7191	0.572711	0.566841	1	Pzp
ENSMUSG00000026058	2.09691	2.12642	2.12418	1.00106	0.316799	1	Khdrbs2
ENSMUSG00000062252	2.26137	2.12538	1.55054	1.37074	0.170457	0.92345	Lhfpl5
ENSMUSG00000024530	1.13252	2.12508	2.86272	0.742329	0.457888	1	Prelid3a
ENSMUSG00000022491	0.955752	2.12317	4.4803	0.473891	0.635578	1	Glycam1
ENSMUSG00000046196	0.499559	2.12303	5.22277	0.406494	0.684379	1	Ttc39d
ENSMUSG00000098672	1.05332	2.11967	4.79203	0.442334	0.658248	1	Mir6911
ENSMUSG00000112442	6.01574	2.11939	0.979809	2.16307	0.0305362	0.588295	AC160405.2
ENSMUSG00000111605	4.461	2.11931	1.19902	1.76754	0.0771382	0.779341	4632418H02Rik
ENSMUSG00000108268	8.74013	2.11887	1.10347	1.92018	0.0548348	0.697817	Gm44187
ENSMUSG00000104910	1.43497	2.11872	2.17327	0.974897	0.329611	1	Gm43331
ENSMUSG00000082464	0.904988	2.1178	2.17805	0.972337	0.330883	1	Rab9b-ps1
ENSMUSG00000112063	24.9468	2.11597	1.10819	1.90938	0.0562125	0.706363	Gm32220
ENSMUSG00000111837	0.634838	2.11476	5.05149	0.418641	0.675479	1	AC164612.2
ENSMUSG00000044667	1.44359	2.1143	2.63993	0.800891	0.423195	1	Plppr4
ENSMUSG00000108614	8.51142	2.1129	0.972647	2.17232	0.0298316	0.581335	2610306O10Rik
ENSMUSG00000097183	7.05655	2.11091	1.13615	1.85795	0.0631756	0.734608	Gm17501
ENSMUSG00000081339	1.32036	2.11023	3.31766	0.636061	0.524736	1	Gm16044
ENSMUSG00000029151	0.555573	2.10708	5.03523	0.418466	0.675606	1	Slc30a3
ENSMUSG00000086997	1.94543	2.10593	1.59902	1.31701	0.187835	0.942211	Gm12981
ENSMUSG00000062170	3.01206	2.10589	2.07499	1.01489	0.310157	1	Fmr1nb
ENSMUSG00000111617	3.70245	2.10385	1.25536	1.67589	0.0937593	0.824391	AC133650.1
ENSMUSG00000029205	0.907457	2.10308	3.82296	0.550119	0.582238	1	Chrna9
ENSMUSG00000112968	0.574046	2.10103	4.17736	0.502957	0.614994	1	AC122379.1
ENSMUSG00000097590	4.60695	2.10021	1.40226	1.49773	0.134204	0.8837	Gm26675
ENSMUSG00000058244	1.36089	2.09916	2.53389	0.828432	0.407426	1	Olfr506
ENSMUSG00000115013	0.72359	2.09724	3.42316	0.61266	0.540101	1	AC149294.3
ENSMUSG00000068696	6.05729	2.09601	1.63884	1.27895	0.200913	0.951109	Gpr88
ENSMUSG00000099254	3.22125	2.09527	1.34601	1.55665	0.119553	0.86405	Mir7030
ENSMUSG00000080610	0.720016	2.09503	3.45443	0.606476	0.544199	1	Snord110
ENSMUSG00000108657	1.41157	2.08946	2.04967	1.01941	0.308007	1	Gm35611
ENSMUSG00000030373	4.23955	2.08852	1.60462	1.30157	0.193064	0.945472	Psg28
ENSMUSG00000094041	0.618238	2.08799	5.0953	0.409788	0.681961	1	Gm28019
ENSMUSG00000111365	1.62836	2.08745	1.84844	1.1293	0.258769	0.985586	AC102554.1
ENSMUSG00000098206	4.2023	2.0859	1.30278	1.60111	0.109352	0.850339	A430106G13Rik
ENSMUSG00000094127	2.20574	2.08573	2.05089	1.01699	0.30916	1	G530012D18Rik
ENSMUSG00000086459	3.19647	2.08242	1.24823	1.6683	0.095256	0.828515	1700030C12Rik
ENSMUSG00000005883	3.76809	2.08153	1.64982	1.26167	0.207067	0.957064	Spo11
ENSMUSG00000107390	5.45507	2.08073	1.00235	2.07585	0.0379081	0.629805	Gm43323
ENSMUSG00000042078	2.91289	2.08056	1.35957	1.5303	0.125942	0.873129	Svop
ENSMUSG00000108812	1.29183	2.07858	2.22148	0.935673	0.349442	1	C130083A15Rik
ENSMUSG00000059654	129.653	2.07849	0.948232	2.19196	0.0283825	0.574124	Reg1
ENSMUSG00000115709	0.884824	2.07797	2.53845	0.818598	0.413016	1	AC134577.2
ENSMUSG00000100658	24.1664	2.07788	1.12681	1.84403	0.0651781	0.74019	F730311O21Rik
ENSMUSG00000102123	0.435793	2.07743	5.21737	0.398176	0.690501	1	Gm4319
ENSMUSG00000075599	0.683095	2.07649	5.18769	0.400274	0.688955	1	Smok3a
ENSMUSG00000038630	1.56472	2.07624	2.18193	0.951559	0.341321	1	Zkscan16
ENSMUSG00000086884	0.760892	2.07604	2.30902	0.899098	0.3686	1	Gm16225
ENSMUSG00000104108	1.0617	2.07528	3.74619	0.55397	0.579599	1	Gm37876
ENSMUSG00000107771	0.391276	2.07456	5.2234	0.397167	0.691244	1	Gm8956
ENSMUSG00000069867	1.1539	2.07433	1.96649	1.05483	0.291501	1	Pabpn1l
ENSMUSG00000041445	49.008	2.07368	0.831238	2.49468	0.0126069	0.425027	Mmrn2
ENSMUSG00000094249	1.44015	2.07361	2.42532	0.854986	0.392559	1	Gm20091
ENSMUSG00000050035	2.90225	2.07051	1.32897	1.55798	0.119238	0.863492	Fhl4
ENSMUSG00000108780	2.92914	2.07019	1.7616	1.17518	0.239922	0.978996	5430434F05Rik
ENSMUSG00000107254	1.81505	2.06989	1.84572	1.12145	0.262095	0.988671	Gm43769
ENSMUSG00000076525	15.462	2.06919	1.69731	1.2191	0.222806	0.968127	Igkv1-99
ENSMUSG00000060459	13.0441	2.06843	1.73569	1.1917	0.233378	0.974787	Kng2
ENSMUSG00000088532	2.67513	2.06786	1.27218	1.62545	0.104067	0.841594	Gm22706
ENSMUSG00000095249	5.72938	2.06667	1.59235	1.29788	0.19433	0.947262	n-R5s103
ENSMUSG00000076493	2.72175	2.06611	1.7312	1.19345	0.232692	0.97374	Trbj2-2
ENSMUSG00000110543	1.86749	2.06611	1.65811	1.24606	0.212742	0.962134	Umpk-ps
ENSMUSG00000064982	2.84773	2.06137	1.74249	1.183	0.236808	0.976608	Gm25259
ENSMUSG00000019848	0.939329	2.06057	2.1064	0.978244	0.327953	1	Popdc3
ENSMUSG00000115340	1.79142	2.06042	1.55474	1.32525	0.185089	0.941357	AC144772.1
ENSMUSG00000103916	1.57444	2.05855	1.87297	1.09908	0.271731	0.992265	Gm38071
ENSMUSG00000025380	3.74316	2.05721	1.06027	1.94028	0.0523459	0.691935	Fscn2
ENSMUSG00000092918	0.697723	2.04877	4.78031	0.428584	0.668226	1	Gm24081
ENSMUSG00000087698	2.12739	2.0481	1.9259	1.06345	0.287578	1	Gm13031
ENSMUSG00000080609	1.21324	2.0478	1.77464	1.15393	0.248529	0.982589	Gm23844
ENSMUSG00000113264	3.84539	2.04723	1.4306	1.43103	0.152421	0.908432	Gm19095
ENSMUSG00000092795	0.592945	2.04486	3.54713	0.576482	0.56429	1	Gm22690
ENSMUSG00000093401	0.698172	2.0447	4.75271	0.430217	0.667038	1	Vmn2r-ps126
ENSMUSG00000094084	3.90113	2.04421	1.20874	1.69119	0.0907998	0.819057	Tdpoz1
ENSMUSG00000099703	4.88535	2.04386	1.3932	1.46702	0.142371	0.895567	Gm28285
ENSMUSG00000096470	0.944547	2.04347	3.0809	0.663272	0.507157	1	Gm9603
ENSMUSG00000043410	10.3559	2.04147	1.20353	1.69623	0.0898418	0.814444	Hfm1
ENSMUSG00000104369	6.99132	2.0399	0.816603	2.49803	0.0124886	0.423772	Gm38082
ENSMUSG00000096292	8.27816	2.03825	1.20622	1.68978	0.0910698	0.819213	Gm2666
ENSMUSG00000080718	3.01743	2.03752	1.27429	1.59895	0.109833	0.850812	Gm8019
ENSMUSG00000113533	0.445546	2.03669	5.20931	0.390971	0.695819	1	Gm46992
ENSMUSG00000084788	2.56892	2.03658	2.00298	1.01677	0.309261	1	Gm11342
ENSMUSG00000084648	1.54786	2.03602	3.67964	0.55332	0.580044	1	Gm24378
ENSMUSG00000103943	0.783461	2.03541	4.79864	0.424164	0.671446	1	Gm37344
ENSMUSG00000097219	1.52057	2.03473	2.50847	0.811142	0.417284	1	Gm26551
ENSMUSG00000069733	1.21338	2.03148	1.92761	1.05388	0.291936	1	Ube2u
ENSMUSG00000101246	0.960427	2.02939	5.15888	0.393378	0.69404	1	Gm29026
ENSMUSG00000095420	1.58725	2.02887	1.94821	1.0414	0.29769	1	Astx1a
ENSMUSG00000110120	1.8208	2.02874	2.02477	1.00196	0.316363	1	Gm45251
ENSMUSG00000104155	1.19017	2.02765	5.20687	0.389419	0.696966	1	Gm38103
ENSMUSG00000108524	2.03904	2.02655	2.71624	0.746087	0.455615	1	Gm44876
ENSMUSG00000108244	0.450462	2.02622	5.22345	0.387909	0.698083	1	Gm44077
ENSMUSG00000101768	0.879762	2.02612	5.18081	0.391082	0.695736	1	Gm28694
ENSMUSG00000095232	0.479893	2.02255	5.20778	0.388372	0.697741	1	Scgb1b19
ENSMUSG00000100167	1.71676	2.02209	1.90019	1.06415	0.287261	1	Gm28207
ENSMUSG00000044629	35.2699	2.02197	0.681604	2.96648	0.00301226	0.213416	Cnrip1
ENSMUSG00000041735	1.66205	2.02144	2.29903	0.879257	0.379262	1	Gm13178
ENSMUSG00000095298	2.7821	2.01671	3.19238	0.631728	0.527565	1	Gm12407
ENSMUSG00000093085	0.698004	2.01378	4.80615	0.419001	0.675215	1	Gm24325
ENSMUSG00000086367	0.734966	2.01321	5.17354	0.389136	0.697175	1	Gm6182
ENSMUSG00000073125	422.812	2.01274	0.920115	2.18749	0.0287067	0.575318	Xlr3b
ENSMUSG00000077493	7.56303	2.01254	1.20673	1.66776	0.0953638	0.828668	Snord91a
ENSMUSG00000076479	4.14663	2.01071	1.65139	1.21759	0.22338	0.968127	Trbv26
ENSMUSG00000051747	5.61517	2.00972	1.22318	1.64303	0.100377	0.836661	Ttn
ENSMUSG00000112000	8.38804	2.00687	0.749464	2.67773	0.00741223	0.339854	AC153501.1
ENSMUSG00000094502	21.0319	2.0047	1.34426	1.49131	0.13588	0.887432	Ighv1-69
ENSMUSG00000111637	1.61178	2.00431	1.53181	1.30845	0.19072	0.94399	Gm10688
ENSMUSG00000074874	1.25208	2.00382	2.57195	0.779105	0.435918	1	Ctla2b
ENSMUSG00000105472	3.14005	2.0035	1.45582	1.3762	0.168759	0.92136	Gm43024
ENSMUSG00000111212	3.80412	2.00307	1.23161	1.62639	0.103868	0.841142	CAAA01194877.1
ENSMUSG00000058147	88.4523	2.00258	0.847053	2.36418	0.0180702	0.488012	Xlr3c
ENSMUSG00000098421	0.99647	2.00146	5.16194	0.387733	0.698214	1	Gm27190
ENSMUSG00000078252	1.31088	2.00016	2.85285	0.701109	0.483235	1	Krtap17-1
ENSMUSG00000101708	0.518446	2.0001	5.21951	0.383197	0.701574	1	Gm28453
ENSMUSG00000094212	0.443706	1.99835	5.21056	0.383519	0.701335	1	Trav14-3
ENSMUSG00000101854	2.83848	1.99832	1.75389	1.13936	0.254552	0.983475	1700026F02Rik
ENSMUSG00000100407	0.440987	1.9978	5.22807	0.38213	0.702365	1	Gm28472
ENSMUSG00000113605	0.685116	1.99639	3.53699	0.564431	0.572461	1	4930425K24Rik
ENSMUSG00000098068	1.09967	1.99357	2.3938	0.832804	0.404955	1	Gm7909
ENSMUSG00000096183	0.850186	1.99347	2.92652	0.681175	0.495761	1	Gm3727
ENSMUSG00000081853	0.544585	1.99178	5.111	0.389704	0.696755	1	Gm13735
ENSMUSG00000090827	4.38592	1.99173	0.882919	2.25584	0.0240805	0.53666	Gm8297
ENSMUSG00000108991	1.4149	1.99136	3.51885	0.565913	0.571453	1	Gm45807
ENSMUSG00000095258	0.839039	1.99097	4.54333	0.438217	0.661229	1	Gm10593
ENSMUSG00000025478	0.816875	1.98851	5.21027	0.381653	0.702719	1	Dpysl4
ENSMUSG00000076596	64.3654	1.9885	0.960848	2.06953	0.0384963	0.634758	Igkv3-10
ENSMUSG00000086109	0.796828	1.9873	3.97144	0.500397	0.616795	1	Gm13391
ENSMUSG00000097266	3.00413	1.98672	5.21121	0.381241	0.703025	1	Gm26802
ENSMUSG00000097612	1.44018	1.98633	1.75244	1.13347	0.257019	0.985403	Gm26509
ENSMUSG00000003354	2.96927	1.98485	1.22015	1.62672	0.103797	0.841142	Ccdc65
ENSMUSG00000101365	5.85898	1.98454	1.11402	1.78141	0.0748453	0.775482	Gm19325
ENSMUSG00000095863	48.8625	1.98444	1.08688	1.82581	0.0678784	0.753064	Ighv1-67
ENSMUSG00000096541	2.91877	1.98392	1.62124	1.2237	0.221064	0.968127	Trav9n-3
ENSMUSG00000083922	0.488169	1.98329	3.17576	0.62451	0.532293	1	Gm3835
ENSMUSG00000101995	0.425334	1.98304	5.19251	0.381904	0.702533	1	Gm29480
ENSMUSG00000082532	4.16971	1.98188	1.86565	1.0623	0.288099	1	Rpl31-ps6
ENSMUSG00000111055	4.11617	1.98153	1.16445	1.70169	0.0888143	0.811894	D030034A15Rik
ENSMUSG00000113383	0.465669	1.98103	5.22462	0.379172	0.70456	1	AC154347.2
ENSMUSG00000095720	5.97223	1.9801	1.40123	1.41312	0.157621	0.913056	Gm1604b
ENSMUSG00000107013	1.80383	1.97945	1.64576	1.20276	0.229069	0.970272	Gm43635
ENSMUSG00000111491	1.8379	1.97791	2.78104	0.711214	0.476952	1	AC135669.2
ENSMUSG00000107836	0.907108	1.97666	2.11846	0.933065	0.350786	1	Gm5315
ENSMUSG00000002459	6.37557	1.97619	1.41745	1.39419	0.163261	0.917241	Rgs20
ENSMUSG00000104166	2.95948	1.97503	1.72193	1.14699	0.251386	0.983117	Gm38247
ENSMUSG00000096596	92.0282	1.97351	0.859121	2.29712	0.0216118	0.513639	Gm10591
ENSMUSG00000094251	1.49331	1.97311	1.62444	1.21464	0.224505	0.968316	Gm25632
ENSMUSG00000086012	0.926501	1.97237	2.46919	0.798794	0.42441	1	Gm15902
ENSMUSG00000104213	747.882	1.97214	1.35509	1.45536	0.145569	0.900655	Ighd
ENSMUSG00000100257	3.666	1.97192	1.10976	1.77688	0.0755879	0.777691	C4bp-ps1
ENSMUSG00000106536	0.764358	1.97051	3.88498	0.507212	0.612006	1	Gm42508
ENSMUSG00000037159	11.6969	1.96976	0.987386	1.99492	0.0460513	0.665785	Wee2
ENSMUSG00000094087	18.8815	1.9663	1.42468	1.38016	0.167537	0.919983	Ighv1-61
ENSMUSG00000115426	9.11713	1.96584	1.08926	1.80474	0.0711151	0.763634	AC129931.1
ENSMUSG00000043800	0.486603	1.96519	5.22791	0.375904	0.706988	1	Kifc5c-ps
ENSMUSG00000097742	1.0223	1.96509	3.34443	0.58757	0.556821	1	Gm26535
ENSMUSG00000098896	5.19065	1.96493	1.14401	1.71758	0.0858734	0.805734	Mir3473g
ENSMUSG00000085397	2.30154	1.96444	1.47417	1.33257	0.182673	0.938109	Gm13524
ENSMUSG00000106092	2.01916	1.96419	1.8881	1.0403	0.298201	1	Gm43072
ENSMUSG00000047894	1.14448	1.96319	4.45514	0.440657	0.659461	1	Ang2
ENSMUSG00000106364	1.11565	1.96107	3.16199	0.620203	0.535124	1	Gm42994
ENSMUSG00000101214	0.449885	1.96094	5.2281	0.375077	0.707603	1	Gm28403
ENSMUSG00000027702	2.59345	1.96093	2.21386	0.88575	0.375752	1	Lrrc34
ENSMUSG00000103899	2.01958	1.96045	2.02743	0.966964	0.333562	1	Gm37940
ENSMUSG00000087677	5.52986	1.96002	0.90577	2.16393	0.0304695	0.587673	Gm15226
ENSMUSG00000099849	0.595373	1.95883	5.21929	0.375307	0.707432	1	Gm29274
ENSMUSG00000102494	0.912235	1.95842	3.31489	0.590794	0.554658	1	Gm36988
ENSMUSG00000004791	15.845	1.95794	1.14616	1.70827	0.0875861	0.80843	Pgf
ENSMUSG00000081778	2.82025	1.95771	4.20333	0.465753	0.641392	1	Gm6325
ENSMUSG00000113278	1.6063	1.95762	3.14831	0.6218	0.534074	1	Gm33016
ENSMUSG00000095730	0.502521	1.95667	5.19446	0.376685	0.706408	1	Vmn2r29
ENSMUSG00000098879	0.577836	1.95462	5.21786	0.374602	0.707957	1	Mir7675
ENSMUSG00000111163	2.17035	1.95457	1.4489	1.34901	0.177335	0.930324	Gm46136
ENSMUSG00000022878	15.3536	1.95351	1.54065	1.26798	0.204807	0.956385	Adipoq
ENSMUSG00000083156	0.904053	1.95217	3.54859	0.550125	0.582234	1	Gm12201
ENSMUSG00000104154	0.589696	1.95078	5.20106	0.375073	0.707606	1	Gm38104
ENSMUSG00000083489	4.6054	1.94676	1.17892	1.65132	0.0986737	0.833483	Gm11784
ENSMUSG00000111943	0.757233	1.94653	4.10951	0.473665	0.635739	1	AC153890.1
ENSMUSG00000025020	10.8741	1.94624	0.77637	2.50684	0.0121815	0.420432	Slit1
ENSMUSG00000082570	0.880128	1.94618	2.91334	0.668024	0.504118	1	Gm15711
ENSMUSG00000081718	0.623002	1.94604	4.96774	0.391735	0.695254	1	Gm8261
ENSMUSG00000106371	0.414327	1.94448	5.21507	0.372858	0.709254	1	9530097N15Rik
ENSMUSG00000107465	2.65453	1.94401	1.47759	1.31566	0.188288	0.942211	Gm5990
ENSMUSG00000085327	4.14772	1.94398	1.38702	1.40155	0.161049	0.917241	Gm16104
ENSMUSG00000096635	2.29546	1.94265	1.29202	1.50358	0.13269	0.882351	Gm22174
ENSMUSG00000012187	2.7155	1.94179	1.53416	1.2657	0.205619	0.956385	Mogat1
ENSMUSG00000103734	0.714842	1.93919	3.50261	0.553642	0.579824	1	Gm37651
ENSMUSG00000085885	2.03015	1.93904	2.06658	0.938281	0.3481	1	Gm11906
ENSMUSG00000065851	0.659566	1.93883	5.23532	0.370337	0.711131	1	Gm22352
ENSMUSG00000093168	0.479528	1.93834	5.21693	0.371547	0.71023	1	Gm22990
ENSMUSG00000095111	3.01544	1.93756	1.48026	1.30893	0.190558	0.943738	Gm23713
ENSMUSG00000037161	8.7144	1.93669	1.54226	1.25575	0.209207	0.959449	Mgarp
ENSMUSG00000057945	2.26312	1.93521	1.59415	1.21395	0.224767	0.968316	Gm17136
ENSMUSG00000097861	2.42085	1.93463	1.35793	1.42469	0.154246	0.90932	Gm26858
ENSMUSG00000025646	14.903	1.93398	0.697286	2.77359	0.00554423	0.295824	Atrip
ENSMUSG00000096678	2.69663	1.93317	1.95807	0.987283	0.323504	1	Trav9-4
ENSMUSG00000099695	0.493529	1.93316	5.16695	0.37414	0.7083	1	Gm28488
ENSMUSG00000051295	0.903508	1.93264	4.59698	0.420415	0.674182	1	9630028B13Rik
ENSMUSG00000092366	3.52929	1.93052	1.25829	1.53425	0.124969	0.870715	Gm17782
ENSMUSG00000085823	20.5085	1.93046	0.871346	2.2155	0.0267259	0.561709	Gm13012
ENSMUSG00000107054	0.507909	1.93014	5.09436	0.378877	0.704779	1	C730045M19Rik
ENSMUSG00000083897	0.612056	1.92945	3.53081	0.546461	0.584749	1	Gm14843
ENSMUSG00000103420	0.944607	1.9255	4.69667	0.409971	0.681828	1	Gm37537
ENSMUSG00000100767	0.503295	1.92402	5.17959	0.371461	0.710294	1	Gm3508
ENSMUSG00000039037	15.9012	1.92289	1.63125	1.17878	0.238484	0.977296	St6galnac5
ENSMUSG00000104999	1.11309	1.92286	2.45305	0.783864	0.43312	1	4930477O15Rik
ENSMUSG00000101476	0.605471	1.92249	5.17124	0.371765	0.710068	1	Gm29570
ENSMUSG00000107561	1.42519	1.92139	2.09082	0.918964	0.358114	1	Gm44264
ENSMUSG00000096900	2.68188	1.91882	2.23174	0.859785	0.389907	1	Trav9-1
ENSMUSG00000095024	0.712503	1.91875	5.23162	0.366761	0.713797	1	Gm5458
ENSMUSG00000104417	0.446545	1.91684	5.21375	0.367651	0.713134	1	Gm37068
ENSMUSG00000102662	12.7834	1.91472	0.567509	3.37391	0.00074109	0.0905271	Gm38377
ENSMUSG00000084744	4.61106	1.91458	1.14421	1.67328	0.0942729	0.826331	Gm25291
ENSMUSG00000023439	1.12485	1.91425	3.174	0.603102	0.546441	1	Gnb3
ENSMUSG00000115071	0.867006	1.91418	3.03552	0.630594	0.528306	1	AC154843.1
ENSMUSG00000051251	1.62353	1.91417	2.55695	0.748617	0.454088	1	Nhlh1
ENSMUSG00000064778	4.25046	1.91265	1.50452	1.27127	0.203634	0.956215	Snord59a
ENSMUSG00000097429	0.937875	1.90935	2.56233	0.745162	0.456174	1	Gm26520
ENSMUSG00000105453	1.47026	1.90847	1.81158	1.05349	0.292119	1	Gm43702
ENSMUSG00000094751	7.06283	1.90554	1.70601	1.11696	0.264013	0.989801	Gm25018
ENSMUSG00000110524	6.70069	1.90392	1.0707	1.7782	0.0753714	0.777691	Gm39228
ENSMUSG00000081574	2.86191	1.90372	1.25861	1.51255	0.130394	0.877798	Gm14429
ENSMUSG00000026736	1.89494	1.90363	2.22843	0.854247	0.392968	1	4930426L09Rik
ENSMUSG00000030158	1.64226	1.90259	2.45735	0.774246	0.438786	1	Clec12b
ENSMUSG00000060461	2.90918	1.90087	1.6013	1.18708	0.235195	0.975437	Dppa5a
ENSMUSG00000111992	1.36283	1.90058	2.57655	0.737645	0.46073	1	AC160863.1
ENSMUSG00000076821	4.61264	1.90044	1.68003	1.13119	0.257974	0.985552	Trav8n-2
ENSMUSG00000113474	1.1592	1.90023	2.74422	0.692448	0.488656	1	AC126554.2
ENSMUSG00000095132	7.96401	1.8986	0.996971	1.90437	0.0568621	0.711672	Rnu6
ENSMUSG00000107556	3.63235	1.89564	1.10497	1.71557	0.0862414	0.805979	Gm44237
ENSMUSG00000108752	0.488943	1.89428	5.21762	0.363054	0.716565	1	Gm45191
ENSMUSG00000104571	3.27818	1.89373	1.53961	1.23001	0.218693	0.965599	Gm43010
ENSMUSG00000088873	0.522037	1.89287	5.12397	0.369415	0.711819	1	Gm25864
ENSMUSG00000103843	1.27564	1.89003	1.95954	0.964526	0.334782	1	Gm31266
ENSMUSG00000089643	0.627624	1.88866	3.96251	0.476633	0.633623	1	Gm16301
ENSMUSG00000114605	5.62053	1.88839	1.42853	1.32191	0.186198	0.942211	AC154548.1
ENSMUSG00000028589	0.614693	1.88727	5.21953	0.361578	0.717667	1	1700012P22Rik
ENSMUSG00000055069	6.99807	1.88489	1.30669	1.44249	0.149163	0.904936	Rab39
ENSMUSG00000076674	59.5878	1.88483	0.923546	2.04086	0.0412649	0.648238	Ighv3-8
ENSMUSG00000093966	1.33235	1.88448	2.18985	0.860549	0.389486	1	Trav4-3
ENSMUSG00000052273	0.500882	1.88055	5.21229	0.360793	0.718254	1	Dnah3
ENSMUSG00000054966	2.40767	1.87978	2.25049	0.835276	0.403562	1	Lmntd1
ENSMUSG00000039194	1.30629	1.87907	1.58496	1.18556	0.235794	0.975918	Rlbp1
ENSMUSG00000111165	0.53775	1.87897	5.22036	0.359932	0.718898	1	4930553I21Rik
ENSMUSG00000057899	1.05419	1.87512	3.0522	0.614351	0.538984	1	Adgrf2
ENSMUSG00000104506	0.703087	1.87339	4.90556	0.381892	0.702542	1	Gm37740
ENSMUSG00000065513	0.636815	1.87337	4.06543	0.460804	0.644939	1	Mir26a-1
ENSMUSG00000076548	12.9743	1.87185	1.6869	1.10964	0.267154	0.990627	Igkv4-69
ENSMUSG00000098773	1.89787	1.8718	1.65073	1.13393	0.256826	0.985242	Gm27179
ENSMUSG00000106192	0.917841	1.87008	2.34053	0.798998	0.424292	1	Gm42818
ENSMUSG00000084024	2.36767	1.86995	1.291	1.44846	0.147489	0.902262	Gm15937
ENSMUSG00000091494	0.466292	1.86966	5.21961	0.3582	0.720194	1	Gm3269
ENSMUSG00000054116	0.443471	1.86966	5.23484	0.357158	0.720974	1	E130116L18Rik
ENSMUSG00000049357	17.1294	1.86726	0.925423	2.01774	0.0436188	0.654366	4933408B17Rik
ENSMUSG00000028475	7.29749	1.8669	1.34685	1.38613	0.165707	0.919081	Spaar
ENSMUSG00000021268	363.06	1.86257	0.728873	2.55541	0.0106062	0.400219	Meg3
ENSMUSG00000096055	1.56218	1.86032	2.68913	0.691794	0.489067	1	Trav12n-1
ENSMUSG00000058567	4.70237	1.86022	1.14084	1.63057	0.10298	0.840434	Gm2531
ENSMUSG00000112900	0.786484	1.86019	4.74923	0.391682	0.695293	1	AC140299.2
ENSMUSG00000054106	201.427	1.85988	2.98179	0.623746	0.532794	1	Try4
ENSMUSG00000093626	7.20716	1.85976	0.967307	1.92262	0.0545279	0.696873	Ly6l
ENSMUSG00000102935	0.95248	1.85902	2.5449	0.730488	0.465092	1	Gm38355
ENSMUSG00000113656	2.02934	1.85828	1.78399	1.04164	0.297577	1	AC124516.2
ENSMUSG00000036938	259.821	1.85156	2.5527	0.725334	0.468247	1	Try5
ENSMUSG00000024225	1382.58	1.84983	0.43841	4.2194	2.44951e-05	0.00557026	Clps
ENSMUSG00000112764	2.26221	1.84952	1.52624	1.21182	0.225581	0.968316	AC144461.2
ENSMUSG00000103292	1.79185	1.84853	1.49139	1.23946	0.215175	0.964112	Gm35048
ENSMUSG00000103693	26.0691	1.84785	0.86903	2.12633	0.0334754	0.608007	Gm37529
ENSMUSG00000095704	5.40473	1.84757	0.89459	2.06527	0.0388975	0.635477	Gm8221
ENSMUSG00000078746	0.660006	1.84647	5.24189	0.352252	0.724649	1	Fam205a4
ENSMUSG00000101662	6.10407	1.84463	1.62482	1.13528	0.256257	0.984995	Gm28499
ENSMUSG00000034732	0.466869	1.8438	5.22428	0.35293	0.724141	1	Pabpc5
ENSMUSG00000109764	0.635473	1.84336	4.83726	0.381076	0.703147	1	Klkb1
ENSMUSG00000087143	3.25526	1.84094	2.09319	0.87949	0.379136	1	A830082K12Rik
ENSMUSG00000086556	1.81994	1.8402	2.03217	0.905534	0.365182	1	Gm15444
ENSMUSG00000086291	6.59413	1.83962	1.13106	1.62647	0.103851	0.841142	Gm15513
ENSMUSG00000104277	2.10733	1.83935	1.68756	1.08995	0.275737	0.996712	Gm38299
ENSMUSG00000022818	5.69324	1.83882	1.31301	1.40047	0.161374	0.917241	Cyp2ab1
ENSMUSG00000080957	1.36955	1.83835	2.78449	0.66021	0.509119	1	Gm15739
ENSMUSG00000103042	2.81723	1.8374	1.35446	1.35656	0.174921	0.928609	Gm2719
ENSMUSG00000027827	10.7613	1.83478	1.20485	1.52283	0.127801	0.874882	Kcnab1
ENSMUSG00000079988	3.10657	1.83465	1.66299	1.10322	0.269932	0.991686	Gm11970
ENSMUSG00000100672	0.559856	1.83458	5.20539	0.352438	0.72451	1	Gm28404
ENSMUSG00000057337	143.757	1.83406	1.23156	1.48922	0.13643	0.88826	Chst3
ENSMUSG00000094162	5.51257	1.83383	1.73386	1.05766	0.290211	1	Ccl19-ps3
ENSMUSG00000034391	2.12716	1.83331	1.23338	1.48641	0.137171	0.888796	Fbxo15
ENSMUSG00000103783	1.14054	1.83305	2.72483	0.672722	0.501124	1	Gm37522
ENSMUSG00000083537	1.35759	1.83234	2.61838	0.699797	0.484054	1	Gm14942
ENSMUSG00000104707	0.912481	1.82932	2.15129	0.850334	0.39514	1	Gm43649
ENSMUSG00000108801	0.576935	1.82899	2.98837	0.612037	0.540514	1	Gm39090
ENSMUSG00000061186	15.0987	1.82892	0.934423	1.95727	0.0503156	0.682443	Sfmbt2
ENSMUSG00000095370	0.988289	1.8287	2.68631	0.680747	0.496031	1	Trav6n-7
ENSMUSG00000084625	1.49605	1.82826	2.02219	0.9041	0.365942	1	Gm25544
ENSMUSG00000059150	2.64898	1.82662	1.45841	1.25247	0.210397	0.959954	Rpl26-ps4
ENSMUSG00000044243	4.40113	1.82452	0.929159	1.96363	0.0495733	0.680101	Bhlha9
ENSMUSG00000075395	3.37072	1.8241	1.42213	1.28266	0.199613	0.951105	A630010A05Rik
ENSMUSG00000106689	1.04987	1.82363	3.77577	0.482983	0.629108	1	Gm18345
ENSMUSG00000102466	2.69346	1.82287	1.52604	1.19451	0.232278	0.973734	Gm38200
ENSMUSG00000084153	0.660936	1.82253	4.25547	0.428281	0.668447	1	Gm12186
ENSMUSG00000024168	20.2562	1.82164	1.33937	1.36007	0.173808	0.927243	Tmem204
ENSMUSG00000051748	514.901	1.81792	1.41054	1.28881	0.197463	0.949607	Wfdc21
ENSMUSG00000088412	0.405057	1.81672	5.21933	0.348076	0.727783	1	Gm24241
ENSMUSG00000029522	11.3963	1.815	2.07954	0.872791	0.382777	1	Pla2g1b
ENSMUSG00000114152	1.73026	1.81321	2.0553	0.88221	0.377663	1	Gm5374
ENSMUSG00000095027	0.626166	1.81312	5.22446	0.347045	0.728557	1	Gm24017
ENSMUSG00000095380	0.626166	1.81312	5.22446	0.347045	0.728557	1	Gm23952
ENSMUSG00000087373	3.20756	1.81244	1.26408	1.4338	0.151631	0.906962	Gm15892
ENSMUSG00000027261	3.57729	1.81127	2.18937	0.827305	0.408064	1	Hao1
ENSMUSG00000090188	7.16814	1.81113	1.05767	1.71238	0.086827	0.807898	Gm7418
ENSMUSG00000091400	1.21232	1.8108	2.24069	0.808144	0.419008	1	Gm6356
ENSMUSG00000097705	5.84566	1.8105	1.19982	1.50897	0.131307	0.879297	Gm26740
ENSMUSG00000106283	1.83381	1.80995	1.67463	1.08081	0.279784	0.998762	Rpl7a-ps2
ENSMUSG00000086683	3.7074	1.80931	1.48038	1.22219	0.221636	0.968127	Gm12867
ENSMUSG00000067215	1.37564	1.80922	2.08403	0.868138	0.385319	1	Usp51
ENSMUSG00000082315	0.508098	1.80889	4.28764	0.421886	0.673109	1	Gm16523
ENSMUSG00000081002	0.905425	1.8074	4.30824	0.419521	0.674835	1	Gm14240
ENSMUSG00000115127	2.61285	1.8051	1.57437	1.14655	0.251568	0.983117	AC137871.2
ENSMUSG00000090675	2.16318	1.8039	2.10239	0.858023	0.39088	1	Olfr111
ENSMUSG00000113505	0.438524	1.80369	5.22004	0.345533	0.729694	1	AC154482.1
ENSMUSG00000086327	2.40612	1.80316	1.69419	1.06432	0.287184	1	Slfn5os
ENSMUSG00000064540	2.02106	1.80316	2.0392	0.884251	0.376561	1	Snord42a
ENSMUSG00000081540	5.1183	1.80082	0.977621	1.84204	0.0654693	0.741408	Gm12538
ENSMUSG00000115577	1.32038	1.80057	2.21346	0.813467	0.41595	1	AC132833.2
ENSMUSG00000113882	1.24318	1.80034	1.7321	1.0394	0.298621	1	AC165273.1
ENSMUSG00000026023	2.65589	1.80024	1.88899	0.953018	0.340581	1	Cdk15
ENSMUSG00000109331	1.79038	1.79956	1.6794	1.07155	0.283923	1	Gm42402
ENSMUSG00000112573	1.65044	1.79839	2.68135	0.670702	0.50241	1	AC153567.1
ENSMUSG00000033910	18.383	1.7961	1.10036	1.63228	0.10262	0.840434	Gucy1a3
ENSMUSG00000073610	0.490396	1.79398	5.19827	0.345111	0.730011	1	Gm10549
ENSMUSG00000025902	3.69078	1.79379	5.21091	0.344237	0.730668	1	Sox17
ENSMUSG00000108929	1.04945	1.79265	2.6462	0.677443	0.498125	1	Cc2d2b
ENSMUSG00000051528	2.44879	1.79233	1.87991	0.953413	0.340381	1	Olfr424
ENSMUSG00000021566	1.02348	1.79163	3.29888	0.543102	0.58706	1	Slc6a19os
ENSMUSG00000044681	21.6625	1.79159	0.837215	2.13994	0.0323595	0.598261	Cnpy1
ENSMUSG00000074232	3.65383	1.79122	1.19278	1.50172	0.13317	0.882351	Gm10647
ENSMUSG00000088490	9.54614	1.79019	0.878805	2.03707	0.0416432	0.648582	Gm24400
ENSMUSG00000110195	5.71853	1.79018	1.11864	1.60032	0.109528	0.850339	Pde2a
ENSMUSG00000064427	19.1744	1.78971	1.01927	1.75587	0.0791101	0.787086	Gm22748
ENSMUSG00000099210	2.27409	1.78953	2.23787	0.799659	0.423909	1	Mir7051
ENSMUSG00000102459	2.02829	1.78875	1.82142	0.982062	0.326069	1	Gm38352
ENSMUSG00000087739	5.13399	1.78851	1.21568	1.4712	0.141236	0.89414	Gm24644
ENSMUSG00000102731	0.862803	1.78782	2.93031	0.610113	0.541787	1	Gm38261
ENSMUSG00000082108	2.16297	1.78574	1.57811	1.13156	0.257818	0.985552	Gm13777
ENSMUSG00000089337	0.909232	1.78538	3.73082	0.478548	0.63226	1	Gm24346
ENSMUSG00000093537	1.16433	1.78524	2.05062	0.870585	0.383981	1	Gm7584
ENSMUSG00000037196	2.93571	1.78513	1.15873	1.54059	0.123416	0.868284	Pacrg
ENSMUSG00000062074	1.80332	1.7848	1.97502	0.903683	0.366163	1	Wisp3
ENSMUSG00000082001	1.00562	1.78456	2.23644	0.797944	0.424903	1	Gm15607
ENSMUSG00000071893	5.05088	1.78443	1.38243	1.29079	0.196775	0.94906	Vmn1r4
ENSMUSG00000068957	1.02983	1.78428	1.94164	0.918953	0.35812	1	4930589L23Rik
ENSMUSG00000065208	14.8011	1.78244	0.698085	2.55332	0.01067	0.401164	Gm24616
ENSMUSG00000095376	4.93676	1.78186	1.36308	1.30723	0.191135	0.944804	Gm22109
ENSMUSG00000097279	1.16583	1.77989	3.25032	0.547605	0.583963	1	Gm5106
ENSMUSG00000071042	143.472	1.77655	0.930976	1.90826	0.0563571	0.707235	Rasgrp3
ENSMUSG00000004654	4.19559	1.77617	1.04889	1.69338	0.0903832	0.817133	Ghrhr
ENSMUSG00000104606	2.35349	1.77401	3.16129	0.561166	0.574684	1	Gm43409
ENSMUSG00000107502	0.740012	1.77279	2.64451	0.670367	0.502624	1	Gm44065
ENSMUSG00000085941	3.59594	1.77211	1.545	1.147	0.251383	0.983117	Gm11201
ENSMUSG00000052013	175.361	1.77206	0.98672	1.79591	0.072509	0.768224	Btla
ENSMUSG00000113392	1.76733	1.77197	2.2915	0.773281	0.439356	1	Gm36262
ENSMUSG00000050211	9.34755	1.77102	0.765762	2.31275	0.0207364	0.509341	Pla2g4e
ENSMUSG00000073753	3.59043	1.76945	1.38288	1.27954	0.200707	0.951109	Gm10571
ENSMUSG00000098376	0.685984	1.76916	3.91235	0.452199	0.651125	1	Mir6907
ENSMUSG00000110520	2.33884	1.76912	1.29143	1.3699	0.17072	0.923667	Gm45776
ENSMUSG00000103966	4.78152	1.76739	1.0384	1.70203	0.0887499	0.811894	Gm37120
ENSMUSG00000103368	1.85591	1.76717	1.30508	1.35407	0.175714	0.929061	Gm36927
ENSMUSG00000114872	1.04859	1.76524	2.56476	0.68827	0.491283	1	CT009494.1
ENSMUSG00000103230	1.2681	1.76462	2.40995	0.732223	0.464033	1	Gm17970
ENSMUSG00000032268	4.58189	1.76425	1.43455	1.22983	0.218761	0.965599	Tmprss5
ENSMUSG00000108042	6.55612	1.76422	1.02361	1.72352	0.0847938	0.803433	B130021K23Rik
ENSMUSG00000075029	2.9615	1.76352	1.4187	1.24305	0.213848	0.963118	4930558J22Rik
ENSMUSG00000087963	1.53984	1.76188	2.55511	0.689553	0.490476	1	Gm25394
ENSMUSG00000006221	6.7394	1.76178	1.62554	1.08381	0.278448	0.998762	Hspb7
ENSMUSG00000085049	1.11437	1.76142	5.22282	0.337254	0.735925	1	Parvaos
ENSMUSG00000031933	57.9673	1.76129	0.994391	1.77123	0.0765226	0.777691	Izumo1r
ENSMUSG00000108976	2.17848	1.75957	1.32659	1.32639	0.184712	0.940268	Gm29797
ENSMUSG00000100629	2.73073	1.75945	2.26358	0.777286	0.43699	1	Gm28192
ENSMUSG00000099809	2.25271	1.75731	1.22489	1.43467	0.151382	0.906962	Gm18665
ENSMUSG00000101722	1.18704	1.75704	2.29422	0.765856	0.443762	1	Gm29125
ENSMUSG00000086395	4.31029	1.75646	1.54118	1.13969	0.254416	0.983453	A630014C17Rik
ENSMUSG00000101086	2.88745	1.75643	1.44334	1.21693	0.223632	0.968127	Gm28651
ENSMUSG00000115206	0.491672	1.7563	5.18924	0.33845	0.735024	1	AC137902.1
ENSMUSG00000114688	8.94059	1.75622	1.11081	1.58103	0.113871	0.855795	AC160980.2
ENSMUSG00000061809	0.511226	1.75555	5.19973	0.337623	0.735647	1	Tbpl2
ENSMUSG00000045225	0.468149	1.75542	5.23901	0.335066	0.737575	1	Olfr1152
ENSMUSG00000115387	2.03635	1.75484	1.44757	1.21227	0.22541	0.968316	AC154563.1
ENSMUSG00000113917	0.975666	1.75385	1.98651	0.88288	0.377301	1	AC160340.2
ENSMUSG00000078486	11.7852	1.75375	0.748611	2.34267	0.0191462	0.493647	Perm1
ENSMUSG00000079045	0.395262	1.75328	5.20023	0.337154	0.736001	1	Prox1os
ENSMUSG00000052293	1.75834	1.7527	1.53558	1.14139	0.253706	0.983199	Taf9
ENSMUSG00000043999	1.94412	1.75185	2.0927	0.837122	0.402524	1	Gpr75
ENSMUSG00000115318	1.4889	1.75182	2.45392	0.713887	0.475297	1	AC129208.1
ENSMUSG00000112937	0.437763	1.7505	5.21975	0.33536	0.737353	1	Gm17746
ENSMUSG00000114033	0.621287	1.74974	3.4889	0.501515	0.616009	1	AC116680.1
ENSMUSG00000099991	0.443107	1.74629	5.19689	0.336025	0.736852	1	Gm29660
ENSMUSG00000092222	5.1943	1.74606	1.87496	0.931253	0.351723	1	Gm20506
ENSMUSG00000106657	1.46867	1.74556	1.51419	1.1528	0.248993	0.982589	AC137678.1
ENSMUSG00000059213	0.784402	1.74372	4.85919	0.35885	0.719708	1	Ddn
ENSMUSG00000076863	1.94716	1.74359	2.412	0.722881	0.469753	1	Trav21-dv12
ENSMUSG00000087633	0.807632	1.74322	2.94245	0.592437	0.553558	1	Gm14455
ENSMUSG00000063594	1.29407	1.74303	3.25218	0.535959	0.591987	1	Gng8
ENSMUSG00000088835	0.586774	1.74226	3.60337	0.483507	0.628736	1	Gm23547
ENSMUSG00000102929	15.6512	1.74171	0.788611	2.20858	0.0272038	0.566121	Gm37154
ENSMUSG00000103952	0.817215	1.74006	4.00853	0.434089	0.664224	1	Gm37268
ENSMUSG00000097459	1.22447	1.73825	2.41039	0.721149	0.470818	1	Gm26895
ENSMUSG00000109473	1.18061	1.73688	2.3227	0.747784	0.45459	1	B930025P03Rik
ENSMUSG00000085728	1.34406	1.73599	1.94639	0.891899	0.372447	1	Gm14339
ENSMUSG00000103513	0.413852	1.73588	4.47604	0.387815	0.698153	1	Gm34780
ENSMUSG00000048503	2.93915	1.73559	2.30408	0.753268	0.451289	1	Tmem136
ENSMUSG00000115842	1.31908	1.73432	1.95466	0.887275	0.374931	1	AC154766.1
ENSMUSG00000105601	5.60285	1.73414	1.21591	1.42621	0.153809	0.90932	Gm42725
ENSMUSG00000107389	0.883012	1.73393	2.18193	0.794677	0.426801	1	Gm43124
ENSMUSG00000084459	7.54974	1.73368	0.952959	1.81926	0.0688711	0.755653	Gm24598
ENSMUSG00000028441	1.63687	1.72925	1.7946	0.963585	0.335254	1	1110017D15Rik
ENSMUSG00000104406	1.41609	1.72911	1.87174	0.9238	0.355591	1	Gm38014
ENSMUSG00000109637	0.607836	1.72836	5.23352	0.330248	0.741213	1	Gm31941
ENSMUSG00000104351	1.55174	1.72833	3.00934	0.574324	0.565749	1	Gm37125
ENSMUSG00000113600	24.3124	1.72771	0.564991	3.05795	0.0022286	0.18058	Gm7868
ENSMUSG00000106962	4.31062	1.7276	1.33642	1.29271	0.196112	0.948775	Gm43633
ENSMUSG00000082189	1.81347	1.72738	1.73553	0.995303	0.319589	1	Gm4784
ENSMUSG00000113559	0.753741	1.72662	3.41269	0.50594	0.612898	1	Gm40987
ENSMUSG00000113781	1.21396	1.72508	1.7975	0.959715	0.337199	1	Gm35558
ENSMUSG00000024064	1.53231	1.72315	2.16936	0.79431	0.427015	1	Galnt14
ENSMUSG00000083847	6.29043	1.72302	1.36337	1.26379	0.206305	0.956385	Xlr3d-ps
ENSMUSG00000021797	1.01392	1.7228	2.21041	0.779402	0.435743	1	9230112D13Rik
ENSMUSG00000097701	0.886398	1.72241	3.85054	0.447316	0.654647	1	Gm17508
ENSMUSG00000096170	4.99197	1.72188	1.93307	0.890749	0.373064	1	n-R5s146
ENSMUSG00000102398	1.56772	1.7211	2.45247	0.701783	0.482814	1	Gm37580
ENSMUSG00000027560	1.28302	1.72108	3.48238	0.494225	0.621147	1	Dok5
ENSMUSG00000075014	0.462976	1.71915	5.22253	0.32918	0.74202	1	Gm10800
ENSMUSG00000104651	20.4154	1.71904	0.610962	2.81366	0.00489816	0.274302	Gm21168
ENSMUSG00000104350	2.41468	1.71781	1.80753	0.95036	0.341929	1	Gm38244
ENSMUSG00000108441	0.889199	1.71669	5.18309	0.331209	0.740487	1	Gm32846
ENSMUSG00000096672	15.6736	1.71571	1.56702	1.09489	0.273565	0.994454	Ighv1-63
ENSMUSG00000091682	10.9894	1.71501	1.09804	1.56188	0.118317	0.861646	Tcrg-C3
ENSMUSG00000009670	28.5442	1.71313	1.05109	1.62987	0.103129	0.840434	Tex11
ENSMUSG00000082350	2.11578	1.71285	1.51205	1.1328	0.257298	0.985463	Gm14008
ENSMUSG00000022237	55.0245	1.7128	0.847738	2.02044	0.0433379	0.653689	Ankrd33b
ENSMUSG00000109399	1.92938	1.71248	1.47078	1.16433	0.24429	0.981548	Gm44982
ENSMUSG00000059857	2.00614	1.7119	1.44705	1.18303	0.236797	0.976608	Ntng1
ENSMUSG00000098489	7.0126	1.71184	1.41095	1.21326	0.225031	0.968316	Mir7678
ENSMUSG00000113984	5.61456	1.71179	1.33416	1.28304	0.199477	0.951105	AC131743.5
ENSMUSG00000065236	2.83568	1.71155	1.48574	1.15198	0.249328	0.982589	n-R5s197
ENSMUSG00000110998	1.49837	1.71117	2.41557	0.708389	0.478704	1	I730028E13Rik
ENSMUSG00000071342	1.29999	1.71006	2.72586	0.627345	0.530433	1	Lsmem1
ENSMUSG00000087693	1.02589	1.70994	2.11225	0.809538	0.418205	1	Gm16191
ENSMUSG00000077787	1.1861	1.70989	2.34805	0.728215	0.466482	1	Gm23908
ENSMUSG00000102549	0.913029	1.70755	4.54637	0.375586	0.707225	1	Gm38137
ENSMUSG00000113078	4.48533	1.70745	1.22834	1.39005	0.164513	0.918265	CT030185.1
ENSMUSG00000105936	2.9926	1.7074	1.43218	1.19217	0.233195	0.974456	Gm43544
ENSMUSG00000104026	1.62285	1.70687	2.22012	0.76882	0.442	1	Gm37212
ENSMUSG00000102452	0.783045	1.70547	2.61665	0.651775	0.514546	1	Gm38344
ENSMUSG00000096969	2.71207	1.70349	1.45781	1.16852	0.242595	0.980464	4930535I16Rik
ENSMUSG00000084088	3.46191	1.70292	1.19164	1.42905	0.152989	0.909195	Gm12941
ENSMUSG00000113871	4.83494	1.70248	1.27487	1.33541	0.181743	0.936888	AC134439.2
ENSMUSG00000112759	0.979481	1.70185	3.30972	0.514198	0.607113	1	AC153516.1
ENSMUSG00000098021	8.64631	1.70116	1.70038	1.00046	0.317088	1	Gm9522
ENSMUSG00000023906	2.62768	1.70007	1.31946	1.28846	0.197588	0.949635	Cldn6
ENSMUSG00000086935	0.823833	1.69997	3.94046	0.431415	0.666167	1	Gm15956
ENSMUSG00000100579	0.448926	1.69964	5.21685	0.325798	0.744577	1	Gm28692
ENSMUSG00000094758	3.37825	1.69812	1.91187	0.8882	0.374433	1	Trav13d-2
ENSMUSG00000021313	3.19828	1.698	1.54435	1.09949	0.271555	0.992265	Ryr2
ENSMUSG00000108120	15.6497	1.69675	0.841569	2.01618	0.0437812	0.655625	9930120I10Rik
ENSMUSG00000095283	2.60161	1.69622	2.20359	0.769753	0.441446	1	Astx1b
ENSMUSG00000095025	1.68137	1.695	2.698	0.628244	0.529844	1	Gm24018
ENSMUSG00000087159	5.40801	1.69462	0.929305	1.82354	0.0682223	0.753934	Gm15246
ENSMUSG00000046961	0.886104	1.69451	4.68923	0.361361	0.717829	1	Gpr156
ENSMUSG00000071347	10.741	1.69403	0.717119	2.36226	0.0181637	0.488796	C1qtnf9
ENSMUSG00000103624	1.31102	1.69224	2.7501	0.615339	0.538331	1	Gm3081
ENSMUSG00000054910	3.89039	1.69162	1.21242	1.39524	0.162944	0.917241	4931415C17Rik
ENSMUSG00000072844	2.34653	1.69152	1.8888	0.895552	0.370492	1	G530011O06Rik
ENSMUSG00000086010	0.885309	1.69139	3.29312	0.513613	0.607523	1	Gm15318
ENSMUSG00000101422	0.738659	1.69103	3.34672	0.50528	0.613362	1	Gm29301
ENSMUSG00000110311	2.25858	1.68936	1.33581	1.26467	0.205991	0.956385	Gm45410
ENSMUSG00000087108	3.62762	1.68844	1.50492	1.12194	0.261887	0.988522	Gm16093
ENSMUSG00000111243	3.96368	1.68691	1.35309	1.24671	0.212503	0.962134	Gm4668
ENSMUSG00000046958	4.70126	1.68587	1.35445	1.24469	0.213247	0.962496	4930432E11Rik
ENSMUSG00000078616	79.3446	1.6858	0.743579	2.26714	0.0233815	0.531784	Trim30c
ENSMUSG00000093262	2.32859	1.68469	1.49824	1.12445	0.260822	0.987334	Gm23413
ENSMUSG00000042353	0.793551	1.68402	4.84462	0.347606	0.728136	1	Frem3
ENSMUSG00000102554	4.24481	1.68251	0.947327	1.77606	0.0757225	0.777691	Gm37568
ENSMUSG00000081681	0.964646	1.68237	3.32345	0.506212	0.612708	1	Gm14868
ENSMUSG00000111551	4.17834	1.68167	0.954776	1.76132	0.0781837	0.782892	AC115034.1
ENSMUSG00000098656	0.670368	1.68105	4.97283	0.338047	0.735328	1	Mir7028
ENSMUSG00000057400	109.132	1.68071	0.595843	2.82073	0.00479149	0.272123	Ces1c
ENSMUSG00000103547	0.801831	1.68062	2.983	0.563399	0.573163	1	Gm37665
ENSMUSG00000105762	3.00228	1.68028	1.68286	0.998467	0.318053	1	Gm43605
ENSMUSG00000096525	6.47804	1.67926	2.46647	0.680835	0.495976	1	Gm2663
ENSMUSG00000052951	1.51135	1.67908	3.05355	0.549878	0.582403	1	C130021I20Rik
ENSMUSG00000043398	7.01091	1.67741	0.872491	1.92255	0.0545369	0.696873	Gpr135
ENSMUSG00000106492	2.67994	1.6769	1.92437	0.871402	0.383535	1	Gm29707
ENSMUSG00000024028	35.9313	1.67624	0.657384	2.54987	0.0107764	0.401968	Tff2
ENSMUSG00000103065	3.65775	1.67593	1.60688	1.04297	0.296962	1	Gm20236
ENSMUSG00000032355	5.87611	1.67577	0.795141	2.10751	0.035073	0.615329	Mlip
ENSMUSG00000101682	0.50704	1.67551	5.20964	0.321617	0.747743	1	Gm29228
ENSMUSG00000113767	4.60887	1.67544	1.44051	1.16308	0.244795	0.981548	AC120540.2
ENSMUSG00000097702	2.00271	1.6754	1.8242	0.91843	0.358394	1	Gm26739
ENSMUSG00000099033	2.73682	1.67462	1.4762	1.13442	0.25662	0.985242	Mir7013
ENSMUSG00000076547	91.4961	1.67452	1.05169	1.59222	0.111335	0.852305	Igkv4-70
ENSMUSG00000099337	1.5649	1.6737	2.33945	0.715425	0.474347	1	Gm29486
ENSMUSG00000104150	1.09418	1.67248	4.44988	0.375848	0.70703	1	Gm44573
ENSMUSG00000082740	6.28883	1.66985	0.972704	1.71671	0.0860329	0.805979	Gm14127
ENSMUSG00000086455	2.16861	1.66942	1.25304	1.3323	0.182761	0.938109	Gm11815
ENSMUSG00000110234	5.63508	1.66912	1.05073	1.58853	0.112167	0.852986	Gm45799
ENSMUSG00000095651	0.540401	1.66907	5.23406	0.318887	0.749812	1	Gm21817
ENSMUSG00000081467	2.07246	1.6669	1.23372	1.35111	0.17666	0.929827	Gm13337
ENSMUSG00000063730	318.224	1.66686	0.421517	3.95442	7.67191e-05	0.014519	Hsd3b2
ENSMUSG00000107701	0.778814	1.66671	3.95404	0.42152	0.673376	1	Gm19287
ENSMUSG00000102110	0.74405	1.66604	3.3325	0.499937	0.61712	1	Gm28440
ENSMUSG00000084477	1.09651	1.66515	2.86298	0.581613	0.560828	1	Gm25780
ENSMUSG00000103234	2.45908	1.66419	1.3528	1.23018	0.218631	0.965599	Gm37158
ENSMUSG00000112265	1.61332	1.66368	1.9937	0.834466	0.404018	1	Gm34983
ENSMUSG00000052281	1.6131	1.66275	2.23761	0.743093	0.457426	1	Tspan32os
ENSMUSG00000104925	0.554374	1.66191	3.57644	0.464684	0.642158	1	Gm43061
ENSMUSG00000094665	0.987915	1.6619	2.44565	0.679534	0.4968	1	Gm24873
ENSMUSG00000110129	1.5638	1.66135	1.70697	0.973272	0.330418	1	Gm45453
ENSMUSG00000110038	0.544409	1.66088	5.18382	0.320397	0.748667	1	Gm45570
ENSMUSG00000100788	2.02645	1.65946	1.42526	1.16432	0.244296	0.981548	Gm21122
ENSMUSG00000083149	0.821731	1.65729	2.52637	0.655999	0.511825	1	Gm11380
ENSMUSG00000078507	1.10012	1.65691	2.84818	0.581745	0.560738	1	Aadacl3
ENSMUSG00000098540	0.865909	1.65658	2.51677	0.658218	0.510398	1	Mir7059
ENSMUSG00000091908	0.757344	1.65634	5.23553	0.316365	0.751725	1	Gm17231
ENSMUSG00000083846	0.59889	1.65607	5.24226	0.315908	0.752073	1	Gm13797
ENSMUSG00000065728	3.94403	1.6557	1.32472	1.24984	0.211356	0.961883	Gm26175
ENSMUSG00000082322	2.16487	1.65541	1.48067	1.11801	0.263562	0.989754	Gm9164
ENSMUSG00000083104	6.53579	1.65535	0.785865	2.10641	0.0351691	0.615579	Gm12917
ENSMUSG00000089678	1.20036	1.65533	2.45606	0.673979	0.500325	1	Agxt2
ENSMUSG00000092483	1.95341	1.65323	1.65971	0.996093	0.319205	1	Gm20421
ENSMUSG00000110176	0.561315	1.65201	5.18412	0.318668	0.749978	1	Gm35520
ENSMUSG00000107012	2.90296	1.65168	2.27357	0.72647	0.467551	1	4930528J11Rik
ENSMUSG00000046922	0.509543	1.65116	4.28832	0.385036	0.70021	1	Gpr6
ENSMUSG00000105057	0.412843	1.65014	5.21521	0.316409	0.751692	1	Gm40190
ENSMUSG00000115543	0.963965	1.64968	3.0849	0.534759	0.592816	1	AC130671.2
ENSMUSG00000074472	1.1923	1.64943	2.18829	0.753754	0.450997	1	Zfp872
ENSMUSG00000051176	3.53181	1.64923	1.37526	1.19921	0.230445	0.97117	Zfp42
ENSMUSG00000064441	3.07366	1.64904	1.11166	1.4834	0.137968	0.888895	Snord37
ENSMUSG00000021414	8.22424	1.64832	0.652207	2.5273	0.0114943	0.41068	Fam217a
ENSMUSG00000027718	4.51122	1.64786	2.03544	0.809581	0.418181	1	Il21
ENSMUSG00000108922	0.64837	1.64669	4.94179	0.333218	0.73897	1	Gm44825
ENSMUSG00000097451	467.857	1.64531	0.583853	2.81802	0.00483201	0.272123	Rian
ENSMUSG00000089976	1.03913	1.64526	3.84101	0.42834	0.668404	1	Gm2389
ENSMUSG00000053469	17.0906	1.64508	1.20898	1.36072	0.173603	0.927243	Tg
ENSMUSG00000094945	1.67744	1.64499	3.69772	0.444868	0.656415	1	Rhox4a2
ENSMUSG00000112960	0.49299	1.64477	5.19395	0.31667	0.751494	1	AC154552.1
ENSMUSG00000112196	1.95052	1.64472	1.62509	1.01208	0.3115	1	Gm8274
ENSMUSG00000102424	0.605628	1.64452	3.63784	0.45206	0.651226	1	Paupar
ENSMUSG00000106651	1.34322	1.64424	1.78622	0.920516	0.357303	1	Gm42608
ENSMUSG00000090397	5.97271	1.64423	1.28734	1.27724	0.201519	0.952114	Gm17096
ENSMUSG00000086820	2.14731	1.64391	1.14944	1.43019	0.152664	0.908718	Gm11465
ENSMUSG00000095127	11.7484	1.64331	1.47406	1.11482	0.264928	0.99036	Ighv1-82
ENSMUSG00000101402	0.924339	1.64319	4.70652	0.34913	0.726991	1	Gm28673
ENSMUSG00000112670	2.78088	1.64221	1.44482	1.13662	0.255696	0.98445	Gm18042
ENSMUSG00000065509	0.844401	1.64129	3.96794	0.413639	0.679139	1	Mir421
ENSMUSG00000094880	2.47111	1.64072	2.10033	0.781174	0.4347	1	Gm11109
ENSMUSG00000040592	597.942	1.63946	1.10353	1.48565	0.137372	0.888849	Cd79b
ENSMUSG00000064380	9.84547	1.63809	0.831759	1.96943	0.0489037	0.677268	Gm26448
ENSMUSG00000037578	2.80765	1.63658	1.36218	1.20144	0.229581	0.970272	Pkd2l1
ENSMUSG00000033882	4.4364	1.63566	2.03495	0.803782	0.421523	1	Rbm46
ENSMUSG00000090485	0.617367	1.63535	4.12443	0.396503	0.691734	1	Gm17416
ENSMUSG00000099068	1.31645	1.63503	2.77545	0.589106	0.55579	1	Gm27861
ENSMUSG00000083508	0.870851	1.6338	2.82777	0.577769	0.56342	1	Gm6027
ENSMUSG00000100130	3.92692	1.63155	1.67515	0.973969	0.330072	1	Gm28379
ENSMUSG00000039798	3.26087	1.63014	1.55573	1.04783	0.294716	1	2600006K01Rik
ENSMUSG00000030577	336.308	1.63006	1.04506	1.55977	0.118815	0.863039	Cd22
ENSMUSG00000100671	0.534631	1.6286	3.53373	0.460873	0.644889	1	Gm28322
ENSMUSG00000109728	1.83401	1.62792	1.31607	1.23696	0.216102	0.964112	Gm45359
ENSMUSG00000083932	0.581056	1.62784	3.59478	0.452836	0.650667	1	Gm11438
ENSMUSG00000105755	2.1855	1.62723	1.62891	0.998967	0.317811	1	Gm43514
ENSMUSG00000098483	1.63381	1.62644	2.09544	0.776181	0.437642	1	Mir7078
ENSMUSG00000035296	0.752648	1.62622	5.22747	0.311091	0.755732	1	Sgcg
ENSMUSG00000115580	0.989535	1.62619	2.23804	0.726613	0.467463	1	AC154838.3
ENSMUSG00000086620	1.04128	1.62582	2.54147	0.639716	0.522357	1	Rspo4os
ENSMUSG00000092597	0.457751	1.62544	5.22165	0.311288	0.755582	1	Gm20486
ENSMUSG00000107651	1.12433	1.62483	2.79341	0.581668	0.56079	1	Gm44166
ENSMUSG00000043295	0.911868	1.62469	2.49404	0.651429	0.514769	1	Gm16373
ENSMUSG00000111017	1.87532	1.62394	2.52843	0.64227	0.520698	1	AC061963.2
ENSMUSG00000045506	2.85176	1.62352	1.14924	1.4127	0.157745	0.913056	A930002H24Rik
ENSMUSG00000105970	19.3661	1.62267	0.897177	1.80864	0.0705075	0.760229	Gm43360
ENSMUSG00000084185	0.567513	1.62198	3.63894	0.44573	0.655792	1	Rplp1-ps1
ENSMUSG00000026989	8.66823	1.62162	1.82168	0.89018	0.373369	1	Dapl1
ENSMUSG00000112433	9.63745	1.61935	0.763211	2.12176	0.0338582	0.611173	Gm30122
ENSMUSG00000097961	20.9921	1.61778	1.0455	1.54738	0.121773	0.868284	Gm27000
ENSMUSG00000107955	0.801158	1.61767	4.74974	0.34058	0.73342	1	Gm44027
ENSMUSG00000089015	2.87139	1.61609	1.33376	1.21168	0.225635	0.968316	Gm24996
ENSMUSG00000056296	0.516872	1.61589	5.1709	0.312498	0.754662	1	Synpr
ENSMUSG00000103925	0.791557	1.61518	3.45436	0.467576	0.640088	1	B230112G18Rik
ENSMUSG00000082280	1.97945	1.61475	1.81138	0.891448	0.372689	1	Gm5847
ENSMUSG00000026616	216.213	1.61413	1.3907	1.16066	0.245779	0.981548	Cr2
ENSMUSG00000051965	1.03635	1.61384	2.83424	0.569409	0.569079	1	Nanos2
ENSMUSG00000101483	0.684716	1.60978	3.48385	0.462069	0.644032	1	1700016L21Rik
ENSMUSG00000103753	0.913246	1.60914	5.2158	0.308513	0.757692	1	Gm6934
ENSMUSG00000076514	87.2556	1.60882	1.24583	1.29137	0.196576	0.94906	Igkv17-121
ENSMUSG00000102919	3.59117	1.60787	1.85327	0.867589	0.385619	1	Gm37726
ENSMUSG00000110443	5.19505	1.60765	0.97557	1.64791	0.0993709	0.834303	Gm39197
ENSMUSG00000049565	4.68061	1.60727	1.03046	1.55975	0.118818	0.863039	Aknad1
ENSMUSG00000102882	0.855653	1.60718	5.22726	0.307461	0.758493	1	Gm2065
ENSMUSG00000086943	0.985397	1.6055	4.66425	0.344213	0.730686	1	4732414G09Rik
ENSMUSG00000081733	2.2734	1.60277	1.47937	1.08341	0.278626	0.998762	Gm12852
ENSMUSG00000086665	0.727176	1.60274	2.57654	0.62205	0.533909	1	Gm13067
ENSMUSG00000108915	0.881361	1.60129	3.43995	0.465498	0.641575	1	Gm44966
ENSMUSG00000112425	0.548019	1.60023	3.61576	0.44257	0.658077	1	AC153512.3
ENSMUSG00000085924	0.517333	1.60009	5.23067	0.305906	0.759677	1	Gm8980
ENSMUSG00000098484	2.95098	1.59995	1.20874	1.32365	0.185619	0.942211	Gm27280
ENSMUSG00000097133	0.994953	1.59891	2.40282	0.665429	0.505776	1	Gm26628
ENSMUSG00000086136	1.10361	1.5985	2.91149	0.549032	0.582983	1	Gm12718
ENSMUSG00000103257	5.71444	1.59823	1.05619	1.5132	0.130228	0.877258	Gm7977
ENSMUSG00000102114	1.55672	1.59723	1.30784	1.22127	0.221983	0.968127	BC048559
ENSMUSG00000025355	460.348	1.59701	0.796384	2.00532	0.0449284	0.660872	Mmp19
ENSMUSG00000082283	1.60057	1.59674	1.75111	0.911841	0.361852	1	Gm14472
ENSMUSG00000059994	259.57	1.5962	1.01423	1.57381	0.115532	0.857343	Fcrl1
ENSMUSG00000104662	2.44683	1.59604	1.79653	0.888404	0.374324	1	Gm43267
ENSMUSG00000092595	0.931646	1.59381	2.52476	0.631274	0.527862	1	Gm20427
ENSMUSG00000102172	0.416974	1.59363	5.20358	0.306256	0.759409	1	Gm37873
ENSMUSG00000027301	0.720107	1.59343	2.91646	0.546356	0.584821	1	Oxt
ENSMUSG00000111692	1.55468	1.59326	2.79893	0.569239	0.569194	1	AC163637.2
ENSMUSG00000039956	2.80699	1.59294	5.21561	0.305419	0.760047	1	Mrap
ENSMUSG00000080918	0.978	1.5916	3.53485	0.450261	0.652522	1	Gm12202
ENSMUSG00000113245	1.40497	1.59058	2.00252	0.79429	0.427026	1	AC124732.1
ENSMUSG00000090782	0.659329	1.58897	5.22374	0.304182	0.760989	1	Traj60
ENSMUSG00000084231	2.41788	1.58803	1.96158	0.809567	0.418189	1	Gm11975
ENSMUSG00000055048	1.09264	1.58796	3.35304	0.473589	0.635793	1	Gm9962
ENSMUSG00000080367	1.51514	1.58783	1.63899	0.968784	0.332653	1	Gm25774
ENSMUSG00000026247	1.263	1.58762	3.28048	0.483959	0.628415	1	Ecel1
ENSMUSG00000088475	0.836617	1.58701	2.96001	0.536149	0.591855	1	Gm23084
ENSMUSG00000002266	1.43518	1.58686	3.62746	0.437458	0.661779	1	Zim1
ENSMUSG00000079330	4.28121	1.58534	2.23694	0.708712	0.478503	1	Lemd1
ENSMUSG00000064923	2.42312	1.58521	2.30629	0.687341	0.491868	1	Gm22042
ENSMUSG00000054196	18.981	1.58508	1.57634	1.00554	0.314635	1	Cthrc1
ENSMUSG00000113780	12.2455	1.58409	0.682497	2.32102	0.0202856	0.506642	Gm33195
ENSMUSG00000105986	2.10266	1.58374	1.62857	0.972476	0.330814	1	Gm43065
ENSMUSG00000109427	1.69944	1.58355	1.41439	1.1196	0.262884	0.989563	Gm45845
ENSMUSG00000079156	0.525444	1.58306	5.19507	0.304724	0.760576	1	Smok3b
ENSMUSG00000100543	7.99197	1.57985	0.966741	1.63421	0.102215	0.839801	Gm29127
ENSMUSG00000105200	2.68278	1.57884	1.54438	1.02231	0.306633	1	Mir378a
ENSMUSG00000084748	0.692137	1.57746	4.89496	0.322261	0.747255	1	Gm25289
ENSMUSG00000115278	1.29554	1.57725	2.93256	0.537841	0.590687	1	AC115304.2
ENSMUSG00000095429	17.9636	1.57694	1.39525	1.13022	0.258385	0.985586	Ighv5-12
ENSMUSG00000052549	12.1911	1.57597	0.82976	1.89931	0.057524	0.713921	Arl13a
ENSMUSG00000108293	0.706889	1.57586	3.36355	0.468512	0.639419	1	Pla2g4c-ps
ENSMUSG00000074841	2.42	1.57338	1.39308	1.12943	0.258718	0.985586	Cbx3-ps1
ENSMUSG00000095489	0.83401	1.57277	3.29815	0.476863	0.63346	1	Gm25737
ENSMUSG00000082622	0.620446	1.5726	3.54886	0.443129	0.657672	1	Gm12632
ENSMUSG00000002791	2.1737	1.57193	1.97179	0.797208	0.42533	1	Pdxk-ps
ENSMUSG00000080626	1.2753	1.57155	2.17968	0.721002	0.470908	1	Mir1192
ENSMUSG00000091163	2.16529	1.57148	2.53389	0.620183	0.535137	1	Gm3962
ENSMUSG00000086879	3.82431	1.57132	1.12465	1.39717	0.162364	0.917241	Gm14012
ENSMUSG00000052551	1.29345	1.57083	1.83262	0.857154	0.39136	1	Adarb2
ENSMUSG00000108713	2.75882	1.57018	1.06564	1.47347	0.140625	0.893472	Gm33027
ENSMUSG00000093996	0.618663	1.5695	4.17167	0.376227	0.706748	1	Fam205a3
ENSMUSG00000030724	400.725	1.56906	1.09555	1.43221	0.152083	0.907414	Cd19
ENSMUSG00000079465	0.874091	1.56879	2.58998	0.605713	0.544705	1	Col4a3
ENSMUSG00000044071	0.685666	1.56766	4.89587	0.3202	0.748817	1	Fam19a2
ENSMUSG00000091238	0.720114	1.56747	5.23883	0.299202	0.764786	1	Gm17103
ENSMUSG00000083887	0.599841	1.56728	5.24031	0.299082	0.764878	1	Gm11930
ENSMUSG00000110517	0.65238	1.56664	5.23593	0.299209	0.764781	1	Gm31224
ENSMUSG00000091938	8.50283	1.56545	1.79905	0.870158	0.384214	1	Gm2564
ENSMUSG00000098904	0.789083	1.56466	3.98678	0.392463	0.694716	1	Mir6998
ENSMUSG00000091661	0.549375	1.56417	4.21409	0.371176	0.710506	1	Gm17021
ENSMUSG00000034911	13.4534	1.56363	0.854383	1.83013	0.0672311	0.751341	Ushbp1
ENSMUSG00000104639	1.35457	1.56309	2.41621	0.646918	0.517685	1	Gm42939
ENSMUSG00000093673	3.3116	1.563	1.32314	1.18128	0.23749	0.976608	Gm20644
ENSMUSG00000052759	2.83697	1.56285	1.51642	1.03062	0.302721	1	Gpr25
ENSMUSG00000087150	1274.42	1.56219	1.28576	1.21499	0.22437	0.968316	BC064078
ENSMUSG00000022487	5.23286	1.56123	0.959913	1.62643	0.103858	0.841142	Gtsf1
ENSMUSG00000093849	0.913743	1.56046	4.52719	0.344686	0.730331	1	Gm7083
ENSMUSG00000093858	0.99018	1.56022	2.65199	0.588319	0.556318	1	Gm19967
ENSMUSG00000088113	1.0234	1.56008	3.91468	0.39852	0.690247	1	Mir1960
ENSMUSG00000103854	2.12684	1.55978	1.62133	0.962035	0.336032	1	Gm37250
ENSMUSG00000106166	7.18322	1.55971	1.15886	1.3459	0.178334	0.931534	Gm43484
ENSMUSG00000102863	6.29218	1.55928	0.776528	2.00802	0.0446411	0.660355	Gm37639
ENSMUSG00000038522	7.3273	1.55893	1.18559	1.3149	0.188543	0.942211	Mfsd4b1
ENSMUSG00000049122	111.499	1.55846	0.579319	2.69016	0.00714177	0.336762	Frmd3
ENSMUSG00000096802	18.7583	1.5581	0.611531	2.54787	0.0108383	0.402831	Gm15433
ENSMUSG00000029419	5.87481	1.55797	0.810723	1.9217	0.0546429	0.697204	Gm996
ENSMUSG00000085316	1.34007	1.55787	5.22212	0.298321	0.765458	1	D330050G23Rik
ENSMUSG00000011632	1.10828	1.55643	2.55329	0.609577	0.542142	1	Pinlyp
ENSMUSG00000112523	2.08253	1.55557	2.14129	0.726462	0.467555	1	AC122024.2
ENSMUSG00000083086	6.18562	1.55432	1.11237	1.3973	0.162323	0.917241	Gm15531
ENSMUSG00000096887	1.56874	1.55412	1.97183	0.78816	0.430603	1	Gm20594
ENSMUSG00000087113	20.5949	1.55369	1.33625	1.16272	0.244945	0.981548	Gm11714
ENSMUSG00000102900	0.998972	1.55323	2.49604	0.622277	0.53376	1	Gm37811
ENSMUSG00000103759	0.486224	1.55314	3.75877	0.413204	0.679457	1	Gm37288
ENSMUSG00000108473	1.89617	1.55311	1.33729	1.16139	0.245484	0.981548	Gm44739
ENSMUSG00000079644	0.49566	1.55168	5.24264	0.295973	0.767251	1	Gm1110
ENSMUSG00000037307	0.547029	1.55002	5.18378	0.299014	0.76493	1	Banf2
ENSMUSG00000022490	34.9573	1.54932	0.569007	2.72285	0.00647211	0.323329	Ppp1r1a
ENSMUSG00000060747	0.520572	1.54927	5.1716	0.299572	0.764504	1	Ifnl3
ENSMUSG00000091185	0.81351	1.54881	2.97978	0.519773	0.603221	1	Gm3278
ENSMUSG00000097026	0.789026	1.54862	3.4202	0.452787	0.650702	1	Gm26786
ENSMUSG00000044387	1.57856	1.54833	1.33212	1.1623	0.245113	0.981548	2410080I02Rik
ENSMUSG00000067702	1.24898	1.54827	1.95081	0.793652	0.427398	1	Tuba3a
ENSMUSG00000106281	2.27079	1.54821	1.62223	0.954374	0.339894	1	Gm44346
ENSMUSG00000039057	4.80011	1.54734	0.903584	1.71245	0.0868134	0.807898	Myo16
ENSMUSG00000094112	2.49952	1.54727	3.56713	0.433758	0.664464	1	9330182O14Rik
ENSMUSG00000084674	1.30573	1.5468	1.91991	0.805659	0.42044	1	Gm26027
ENSMUSG00000092695	2.69226	1.54617	1.95043	0.792732	0.427934	1	Mir3092
ENSMUSG00000084081	7.00547	1.54594	0.753192	2.05252	0.0401192	0.643871	Gm12057
ENSMUSG00000110636	2.38217	1.54591	1.47647	1.04703	0.295087	1	Gm39397
ENSMUSG00000089719	0.882319	1.54562	2.17074	0.712024	0.47645	1	Gm15758
ENSMUSG00000096023	1.22293	1.5456	1.55305	0.995208	0.319635	1	Gm3542
ENSMUSG00000110774	8.42543	1.54499	0.802713	1.92472	0.054265	0.696873	Gm39318
ENSMUSG00000021098	0.883193	1.54442	2.6235	0.588687	0.556071	1	4930447C04Rik
ENSMUSG00000092224	7.90909	1.5434	1.22364	1.26132	0.207193	0.95714	Gm8815
ENSMUSG00000102523	15.248	1.54191	0.719243	2.1438	0.0320488	0.59651	Gm37783
ENSMUSG00000065368	4.60702	1.54185	0.982583	1.56919	0.116605	0.858266	Gm24414
ENSMUSG00000103505	0.817466	1.54171	5.17645	0.297831	0.765832	1	Gm38374
ENSMUSG00000058897	2.56758	1.54169	1.67031	0.922997	0.356009	1	Col25a1
ENSMUSG00000111342	0.963173	1.54032	4.69509	0.328069	0.742859	1	4933404K13Rik
ENSMUSG00000065270	1.5172	1.53777	1.68857	0.910697	0.362455	1	Gm25127
ENSMUSG00000018907	1.12295	1.53759	2.13429	0.720423	0.471265	1	Alox12e
ENSMUSG00000097176	3.41636	1.53544	1.44882	1.05979	0.289242	1	Gm26830
ENSMUSG00000000617	6.61986	1.53531	1.80098	0.852491	0.393942	1	Grm6
ENSMUSG00000037922	178.404	1.53504	1.2212	1.25699	0.208756	0.958606	Bank1
ENSMUSG00000106032	1.92224	1.53481	1.83947	0.834376	0.404069	1	Gm42463
ENSMUSG00000094347	1.23769	1.53365	1.53573	0.99864	0.317969	1	Olfr784
ENSMUSG00000092349	4.63279	1.53321	1.48414	1.03306	0.301577	1	Platr17
ENSMUSG00000096839	1.81534	1.5325	1.64561	0.931267	0.351716	1	Gm3460
ENSMUSG00000081946	2.28872	1.53195	1.47353	1.03964	0.298506	1	Gm11472
ENSMUSG00000027867	15.0469	1.5316	0.805475	1.90149	0.0572376	0.711948	Spag17
ENSMUSG00000082455	1.22249	1.53145	4.24067	0.361133	0.718	1	Gm13665
ENSMUSG00000050963	1.97118	1.52898	1.73503	0.881239	0.378189	1	Kcns2
ENSMUSG00000115087	2.89053	1.52848	1.89179	0.807956	0.419116	1	AC126251.1
ENSMUSG00000108542	2.32051	1.52809	1.42371	1.07331	0.283132	1	Gm44834
ENSMUSG00000094065	173.681	1.52666	1.00889	1.5132	0.130229	0.877258	Gm21541
ENSMUSG00000089308	1.51333	1.52654	1.87465	0.81431	0.415468	1	Gm24837
ENSMUSG00000042631	5.08321	1.52652	0.71991	2.12042	0.0339702	0.612072	Xkr7
ENSMUSG00000091329	0.434584	1.5263	5.20434	0.293274	0.769313	1	1700112D23Rik
ENSMUSG00000106663	1.87489	1.52546	1.63525	0.932857	0.350894	1	Gm42839
ENSMUSG00000034739	0.558524	1.5243	4.26475	0.357418	0.720779	1	Mfrp
ENSMUSG00000085418	3.23851	1.52392	1.07742	1.41441	0.157241	0.913056	Grip1os1
ENSMUSG00000091577	1.9203	1.52284	1.8292	0.832514	0.405119	1	Gm6211
ENSMUSG00000104927	4.72711	1.5227	1.70794	0.89154	0.37264	1	Gm43388
ENSMUSG00000097465	0.854865	1.52269	5.23202	0.291033	0.771026	1	Gm16619
ENSMUSG00000091676	0.638828	1.52216	5.06035	0.3008	0.763567	1	Gm8374
ENSMUSG00000112530	1.29407	1.51986	2.03711	0.746089	0.455614	1	AC155941.2
ENSMUSG00000078593	1.17224	1.51967	2.87098	0.529321	0.596583	1	1700042G07Rik
ENSMUSG00000072589	1.10968	1.51937	2.6574	0.571752	0.56749	1	Gm10371
ENSMUSG00000115249	6.78185	1.51761	1.04695	1.44955	0.147184	0.902042	AC122291.1
ENSMUSG00000081811	0.434574	1.5173	5.1912	0.292284	0.77007	1	Gm12713
ENSMUSG00000032942	3.73859	1.51698	1.35108	1.12279	0.261527	0.988522	Ucp3
ENSMUSG00000083558	0.651075	1.51689	4.91606	0.308558	0.757658	1	Gm12896
ENSMUSG00000104693	31.0867	1.5156	0.877247	1.72768	0.0840455	0.801971	Gm42941
ENSMUSG00000104500	1.07942	1.51539	2.49164	0.608189	0.543062	1	Gm36345
ENSMUSG00000115144	0.627004	1.51526	4.99746	0.303205	0.761733	1	AC121598.2
ENSMUSG00000102080	0.654292	1.51419	5.17029	0.292863	0.769627	1	Gm5092
ENSMUSG00000078868	2.55522	1.51268	1.45521	1.03949	0.298577	1	Gm14412
ENSMUSG00000097122	1.93064	1.5125	1.95809	0.772437	0.439856	1	Gm26624
ENSMUSG00000084195	1.73987	1.51199	1.63177	0.926596	0.354136	1	Gm15372
ENSMUSG00000013353	0.449095	1.51067	5.22474	0.289138	0.772476	1	4931406B18Rik
ENSMUSG00000082116	1.12923	1.51064	2.4649	0.61286	0.539969	1	Gm12188
ENSMUSG00000102715	5.68838	1.51043	1.33891	1.1281	0.259276	0.985888	Gm6209
ENSMUSG00000103094	3.16611	1.50957	1.86444	0.809665	0.418132	1	Gm37558
ENSMUSG00000111454	0.587455	1.50913	5.19911	0.290267	0.771612	1	Olfr998
ENSMUSG00000096149	1.10404	1.50885	4.39837	0.343046	0.731564	1	Trav6-5
ENSMUSG00000048424	0.471258	1.50778	5.21712	0.289006	0.772577	1	Ranbp3l
ENSMUSG00000082561	1.5212	1.50656	1.59486	0.944636	0.344845	1	Gm15580
ENSMUSG00000025318	3.26436	1.50543	1.27051	1.1849	0.236058	0.976608	Jph3
ENSMUSG00000044957	2.11878	1.50542	1.75405	0.858251	0.390754	1	Pp2d1
ENSMUSG00000108214	3.7875	1.50518	1.13293	1.32857	0.183988	0.939874	Gm43982
ENSMUSG00000088354	0.438011	1.50505	5.20162	0.289342	0.77232	1	Gm27592
ENSMUSG00000073650	9.16645	1.50484	0.899919	1.6722	0.0944855	0.826892	Catip
ENSMUSG00000101061	2.54256	1.50384	1.09246	1.37657	0.168646	0.92136	Platr1
ENSMUSG00000076614	187.536	1.50367	0.889808	1.68988	0.0910516	0.819213	Ighg1
ENSMUSG00000109731	1.09042	1.50365	2.0089	0.748495	0.454162	1	Gm45425
ENSMUSG00000031519	5.50575	1.50302	0.997072	1.50743	0.1317	0.880157	Asb5
ENSMUSG00000077148	8.62979	1.50235	1.05377	1.42568	0.153961	0.90932	Gm22935
ENSMUSG00000086147	4.73686	1.5022	1.15044	1.30577	0.191632	0.945025	Zfp989
ENSMUSG00000094546	51.9029	1.50123	0.980193	1.53157	0.125629	0.873091	Ighv1-26
ENSMUSG00000094787	102.368	1.50045	1.33963	1.12005	0.262692	0.989332	Ighv1-54
ENSMUSG00000115481	0.792557	1.50013	2.2545	0.665391	0.5058	1	AC130673.2
ENSMUSG00000104091	0.596628	1.49927	5.18969	0.288894	0.772663	1	Gm37317
ENSMUSG00000113744	1.04586	1.49883	2.34865	0.638166	0.523365	1	AC122840.3
ENSMUSG00000103238	7.75883	1.49841	1.1057	1.35516	0.175366	0.929061	Gm36527
ENSMUSG00000085116	5.14381	1.49741	0.78182	1.91528	0.0554567	0.699673	Gm2735
ENSMUSG00000094164	47.9383	1.49566	1.4327	1.04394	0.296513	1	Ighv2-3
ENSMUSG00000076921	0.553395	1.49509	5.22284	0.286259	0.774679	1	Traj7
ENSMUSG00000085860	0.737615	1.49416	4.06062	0.367964	0.7129	1	2410003L11Rik
ENSMUSG00000089404	0.991379	1.49391	3.88671	0.384362	0.70071	1	Gm24877
ENSMUSG00000027824	0.70169	1.49368	4.95536	0.301428	0.763088	1	Vmn2r1
ENSMUSG00000097639	15.56	1.49251	0.709044	2.10496	0.0352947	0.616221	Platr4
ENSMUSG00000076676	0.590425	1.49251	5.23893	0.284888	0.77573	1	Ighv12-3
ENSMUSG00000106341	0.447098	1.49242	5.20654	0.286644	0.774385	1	Gm43330
ENSMUSG00000102364	39.9851	1.49194	1.12376	1.32764	0.184298	0.940031	Ighv8-5
ENSMUSG00000103883	3.97007	1.49171	1.27788	1.16733	0.243077	0.980884	Gm37010
ENSMUSG00000076604	2.52363	1.49108	3.45077	0.432102	0.665667	1	Igkj1
ENSMUSG00000021335	0.52377	1.49053	5.23815	0.284552	0.775988	1	Slc17a1
ENSMUSG00000111324	2.22575	1.4903	1.59856	0.932273	0.351196	1	Gm31410
ENSMUSG00000003379	838.75	1.49024	1.10628	1.34707	0.177956	0.931461	Cd79a
ENSMUSG00000084632	3.20579	1.49001	1.80232	0.826714	0.408399	1	Gm23887
ENSMUSG00000061082	0.907905	1.48965	3.30255	0.451061	0.651946	1	Plac1
ENSMUSG00000003545	3863.59	1.48867	0.939234	1.58499	0.11297	0.853441	Fosb
ENSMUSG00000108844	1.42665	1.48816	1.81923	0.818016	0.413348	1	Gm6702
ENSMUSG00000114804	1.99849	1.48768	1.43472	1.03691	0.299777	1	AC147044.1
ENSMUSG00000108362	1.40677	1.48605	2.63028	0.564978	0.572089	1	Gm18561
ENSMUSG00000109861	2.05429	1.48544	1.87423	0.792563	0.428032	1	4930458B22Rik
ENSMUSG00000091996	2.42195	1.48527	2.27495	0.652882	0.513833	1	BC049352
ENSMUSG00000107985	3.63625	1.48481	1.26629	1.17257	0.240969	0.979345	Gm35037
ENSMUSG00000048001	8.33235	1.48462	0.801816	1.85157	0.0640872	0.737665	Hes5
ENSMUSG00000046178	1.51428	1.48356	2.16307	0.685858	0.492803	1	Nxph1
ENSMUSG00000095580	2.29098	1.48343	2.23594	0.663449	0.507043	1	Rnu1b1
ENSMUSG00000102650	0.587848	1.48274	5.17665	0.286428	0.77455	1	Gm19863
ENSMUSG00000078772	7.1679	1.48165	0.738481	2.00635	0.0448187	0.660355	Gm12353
ENSMUSG00000026984	17.1148	1.48116	0.865158	1.71201	0.0868941	0.807898	Il1f6
ENSMUSG00000102697	1.07841	1.47987	2.76734	0.534762	0.592815	1	Pcdhac2
ENSMUSG00000055003	5.62603	1.47955	1.09579	1.35022	0.176946	0.929842	Lrtm2
ENSMUSG00000107991	0.680513	1.47807	2.72667	0.542078	0.587765	1	Gm43919
ENSMUSG00000031957	553.739	1.47595	2.36308	0.624587	0.532242	1	Ctrb1
ENSMUSG00000107750	1.57394	1.47564	1.91051	0.772382	0.439888	1	Gm44013
ENSMUSG00000101353	0.71679	1.47455	3.45954	0.426226	0.669943	1	Gm29203
ENSMUSG00000108696	0.749613	1.47381	3.39162	0.434546	0.663892	1	Gm5738
ENSMUSG00000027070	8.59269	1.47369	1.6424	0.897274	0.369573	1	Lrp2
ENSMUSG00000073879	0.61565	1.47279	5.12231	0.287526	0.77371	1	Gm5859
ENSMUSG00000110440	13.4434	1.47206	0.724002	2.03323	0.0420295	0.648582	Gm45894
ENSMUSG00000102740	3.73158	1.47093	1.09982	1.33744	0.18108	0.935623	Gm37599
ENSMUSG00000018479	0.536116	1.46989	4.26054	0.345	0.730094	1	1700125H20Rik
ENSMUSG00000109770	1.26123	1.46916	5.24018	0.280364	0.779198	1	Gm30085
ENSMUSG00000096108	2.54582	1.46882	3.78391	0.388176	0.697885	1	Ighv11-2
ENSMUSG00000101746	1.47007	1.46848	3.40029	0.431869	0.665837	1	2310043L19Rik
ENSMUSG00000029361	9.00579	1.46838	1.47081	0.998346	0.318111	1	Nos1
ENSMUSG00000030068	2.32463	1.46804	2.09559	0.700541	0.48359	1	Gm20696
ENSMUSG00000095862	4.84641	1.46636	1.48317	0.988662	0.322829	1	Trav6-6
ENSMUSG00000040258	2.20886	1.46633	1.93108	0.759334	0.447653	1	Nxph4
ENSMUSG00000065599	0.908024	1.46599	2.57121	0.570157	0.568571	1	Mir23b
ENSMUSG00000097002	1.02082	1.46529	5.24113	0.279574	0.779804	1	Gm2670
ENSMUSG00000056366	1.74925	1.4646	1.45406	1.00725	0.313812	1	Fabp3-ps1
ENSMUSG00000000386	1916.99	1.46436	0.394929	3.70791	0.000208973	0.0335759	Mx1
ENSMUSG00000108137	8.82644	1.46401	0.99647	1.4692	0.141778	0.89513	Gm44053
ENSMUSG00000103126	8.04391	1.46275	1.09078	1.34101	0.179916	0.93355	Gm37387
ENSMUSG00000026532	4.5958	1.46128	1.15373	1.26657	0.205311	0.956385	Spta1
ENSMUSG00000099631	1.48944	1.46085	1.95196	0.748405	0.454216	1	Gm8641
ENSMUSG00000102973	1.98024	1.46074	3.98257	0.366785	0.71378	1	E430014B02Rik
ENSMUSG00000101325	1.83011	1.45975	2.91759	0.500327	0.616845	1	Scgb2b4-ps
ENSMUSG00000091523	4.14106	1.45931	1.6664	0.875727	0.381178	1	AU040972
ENSMUSG00000087044	4.37823	1.4587	1.22021	1.19545	0.231911	0.97342	1700042G15Rik
ENSMUSG00000023052	18.4463	1.45863	0.593292	2.45854	0.0139504	0.441672	Npff
ENSMUSG00000093672	0.713792	1.45851	4.76448	0.306121	0.759513	1	Gm20655
ENSMUSG00000099746	3.92014	1.45817	0.84725	1.72106	0.0852396	0.804413	Ppnr
ENSMUSG00000005124	24.3771	1.45813	1.33497	1.09226	0.274721	0.996025	Wisp1
ENSMUSG00000104449	6.65721	1.45813	0.89017	1.63803	0.101415	0.838531	Gm37255
ENSMUSG00000110282	2.28179	1.45797	1.71574	0.849761	0.395458	1	B930086L07Rik
ENSMUSG00000047880	189.219	1.45777	0.90362	1.61325	0.106689	0.847056	Cxcr5
ENSMUSG00000070530	6.67266	1.45758	0.940789	1.54931	0.121306	0.867951	Wfdc16
ENSMUSG00000113094	6.20796	1.45721	1.10735	1.31594	0.188193	0.942211	AC159649.1
ENSMUSG00000113119	10.2676	1.45644	0.770071	1.8913	0.0585839	0.717497	AL645783.1
ENSMUSG00000113752	10.0024	1.45593	0.826395	1.76179	0.0781051	0.782892	AC159244.3
ENSMUSG00000047977	2.57193	1.45549	1.38899	1.04788	0.294696	1	Synb
ENSMUSG00000113209	1.33159	1.4549	2.05376	0.708407	0.478693	1	1700081N11Rik
ENSMUSG00000079033	26.6846	1.45479	1.04499	1.39216	0.163874	0.918265	Mef2b
ENSMUSG00000095419	2.28254	1.45471	1.68563	0.863008	0.388133	1	Gm14328
ENSMUSG00000025573	3.78255	1.45442	1.44424	1.00705	0.313912	1	6030468B19Rik
ENSMUSG00000108783	6.16547	1.45384	0.925184	1.5714	0.116089	0.857605	Gm36546
ENSMUSG00000054417	149.631	1.45331	1.07817	1.34794	0.177677	0.931268	Cyp3a44
ENSMUSG00000092523	2.08036	1.45315	1.72941	0.840257	0.400764	1	Gm18191
ENSMUSG00000041538	437.39	1.45286	0.982596	1.47859	0.139249	0.890375	H2-Ob
ENSMUSG00000088226	8.16376	1.45279	1.02546	1.41672	0.156563	0.912925	Gm22596
ENSMUSG00000067879	0.635549	1.45159	4.14112	0.350531	0.72594	1	3110035E14Rik
ENSMUSG00000065750	7.6507	1.44854	1.19431	1.21287	0.22518	0.968316	Gm23346
ENSMUSG00000077138	3.71739	1.44832	1.46367	0.989512	0.322413	1	Gm23577
ENSMUSG00000021795	1.33921	1.44722	2.31549	0.625018	0.531959	1	Sftpd
ENSMUSG00000113579	2.34153	1.44576	1.79059	0.80742	0.419425	1	AC122327.2
ENSMUSG00000089542	22.6931	1.4456	0.708107	2.04149	0.0412017	0.648041	Gm25835
ENSMUSG00000092294	2.824	1.44481	1.2378	1.16724	0.243113	0.980884	Gm18200
ENSMUSG00000101674	1.00854	1.4448	3.2159	0.449269	0.653238	1	4930444A19Rik
ENSMUSG00000086360	2.95854	1.44316	1.56563	0.921773	0.356647	1	Gm16214
ENSMUSG00000106549	0.858577	1.44267	2.50094	0.576849	0.564042	1	Gm42653
ENSMUSG00000108956	0.751831	1.44255	5.23168	0.275733	0.782753	1	Gm45179
ENSMUSG00000016763	51.4069	1.44253	0.990168	1.45686	0.145156	0.900655	Scube1
ENSMUSG00000099170	2.25823	1.44249	1.36505	1.05673	0.290635	1	5730403I07Rik
ENSMUSG00000113705	2.93347	1.44245	2.26381	0.637179	0.524008	1	AC238676.3
ENSMUSG00000100120	2.08422	1.44209	1.49708	0.963268	0.335413	1	Gm553
ENSMUSG00000103135	6.82229	1.44205	0.742092	1.94322	0.0519897	0.689904	Gm37979
ENSMUSG00000094686	437.222	1.44197	0.717144	2.01071	0.0443563	0.660031	Ccl21a
ENSMUSG00000082765	1.13376	1.44178	3.62579	0.397646	0.690891	1	Gm14411
ENSMUSG00000108650	0.872332	1.44085	3.19214	0.451375	0.65172	1	Gm44867
ENSMUSG00000097925	1.51829	1.44084	1.83422	0.78553	0.432143	1	Gm26574
ENSMUSG00000033730	49.1848	1.4405	0.592704	2.43039	0.0150827	0.456715	Egr3
ENSMUSG00000111913	3.8014	1.4401	1.56803	0.918414	0.358402	1	AC153498.1
ENSMUSG00000102776	3.5237	1.4391	1.4562	0.988254	0.323028	1	Gm38162
ENSMUSG00000089898	1.02344	1.43887	2.63561	0.545932	0.585113	1	Gm14199
ENSMUSG00000106087	40.938	1.43809	0.63948	2.24885	0.024522	0.541906	Gm43609
ENSMUSG00000040164	1.60402	1.43801	2.15612	0.666943	0.504808	1	Kcns1
ENSMUSG00000102943	0.676498	1.43757	4.08947	0.351529	0.725192	1	Gm37550
ENSMUSG00000024673	403.876	1.4372	1.07172	1.34103	0.179912	0.93355	Ms4a1
ENSMUSG00000103343	1.52411	1.43713	2.2722	0.632484	0.52707	1	Gm37052
ENSMUSG00000062778	0.512172	1.43708	5.18306	0.277265	0.781577	1	Chia1
ENSMUSG00000036139	0.775028	1.43523	4.74978	0.302168	0.762524	1	Hoxc9
ENSMUSG00000112009	3.55376	1.43443	1.21174	1.18377	0.236503	0.976608	AC140264.1
ENSMUSG00000104585	1.28288	1.43409	3.46097	0.414361	0.67861	1	4921511C10Rik
ENSMUSG00000074766	23.5265	1.43374	0.839111	1.70864	0.0875172	0.808323	Ism1
ENSMUSG00000106251	27.0089	1.43316	0.619794	2.31232	0.0207601	0.509481	Gm42658
ENSMUSG00000056035	8.94727	1.43269	0.94845	1.51056	0.130901	0.878488	Cyp3a11
ENSMUSG00000021750	8.83247	1.43097	1.82074	0.785924	0.431912	1	Fam107a
ENSMUSG00000017309	10.9814	1.43033	1.33862	1.06851	0.285292	1	Cd300lg
ENSMUSG00000080847	0.587837	1.42939	5.07925	0.281417	0.778391	1	Gm4773
ENSMUSG00000067578	1.26711	1.42891	2.65592	0.53801	0.59057	1	Cbln4
ENSMUSG00000112762	8.03921	1.4288	0.61392	2.32734	0.0199473	0.503077	4930459C07Rik
ENSMUSG00000106858	2.02315	1.4285	2.38945	0.597836	0.549949	1	Gm43844
ENSMUSG00000112789	4.28563	1.42822	1.02991	1.38674	0.16552	0.918452	Gm19326
ENSMUSG00000082515	7.17601	1.4277	0.832236	1.7155	0.0862529	0.805979	Gm12902
ENSMUSG00000109679	5.76552	1.42735	1.08812	1.31176	0.189603	0.943031	Gm45342
ENSMUSG00000101743	0.926913	1.42727	2.33528	0.611176	0.541083	1	Gm28249
ENSMUSG00000064925	3.03769	1.42722	1.25859	1.13399	0.256801	0.985242	Snora62
ENSMUSG00000036800	1.38977	1.42583	1.77717	0.802302	0.422379	1	Fam135b
ENSMUSG00000100465	11.3528	1.42579	1.6408	0.868958	0.38487	1	Gm29264
ENSMUSG00000031224	4.57321	1.42539	0.849099	1.6787	0.0932099	0.822125	Magee2
ENSMUSG00000046634	4.11929	1.42478	1.17476	1.21282	0.225197	0.968316	Pkd1l1
ENSMUSG00000014030	314.013	1.42469	1.15234	1.23635	0.21633	0.964112	Pax5
ENSMUSG00000023192	3.09344	1.42315	1.54206	0.922888	0.356066	1	Grm2
ENSMUSG00000099385	3.43482	1.423	1.2985	1.09588	0.273131	0.994093	Gm9540
ENSMUSG00000112120	0.817421	1.42295	4.70575	0.302385	0.762358	1	Gm32255
ENSMUSG00000106476	2.71191	1.42196	1.56378	0.909309	0.363187	1	Rpl36-ps9
ENSMUSG00000109638	6.06991	1.42166	1.07682	1.32024	0.186754	0.942211	Gm45630
ENSMUSG00000104379	5.81174	1.42111	0.921979	1.54137	0.123226	0.868284	Gm37509
ENSMUSG00000107015	0.433616	1.42097	5.18702	0.273948	0.784125	1	2900076G11Rik
ENSMUSG00000111497	5.90053	1.42075	1.27885	1.11096	0.266586	0.990627	Raver1
ENSMUSG00000110114	1.82632	1.42032	1.95852	0.7252	0.468329	1	Gm45471
ENSMUSG00000074224	0.912504	1.42028	2.18131	0.651111	0.514975	1	4932431P20Rik
ENSMUSG00000112920	2.66902	1.41969	1.10549	1.28422	0.199065	0.951105	Spata22
ENSMUSG00000032271	29.0338	1.41968	1.74827	0.812047	0.416765	1	Nnmt
ENSMUSG00000080743	0.850303	1.41918	3.89922	0.363966	0.715883	1	Gm7150
ENSMUSG00000071770	0.586791	1.41898	5.22118	0.271773	0.785797	1	Rhox4e
ENSMUSG00000022821	4.53315	1.41823	1.16376	1.21867	0.222971	0.968127	Hgd
ENSMUSG00000085886	8.58077	1.4181	0.875525	1.61971	0.105295	0.845068	D030047H15Rik
ENSMUSG00000035984	8.37511	1.41466	0.882566	1.60289	0.108958	0.849887	Nme5
ENSMUSG00000077990	13.1332	1.41463	0.96442	1.46681	0.142427	0.895567	Gm23134
ENSMUSG00000106717	29.6024	1.41456	0.528017	2.679	0.00738417	0.339854	Gm42798
ENSMUSG00000089664	2.77957	1.41404	1.30334	1.08494	0.277947	0.998762	Gm12494
ENSMUSG00000057596	644.856	1.41388	0.508456	2.78073	0.0054237	0.291866	Trim30d
ENSMUSG00000027596	1.43027	1.41368	2.19008	0.64549	0.51861	1	a
ENSMUSG00000067878	6.89214	1.4122	1.395	1.01233	0.311378	1	Map7d3
ENSMUSG00000083599	1.93466	1.41217	1.46497	0.963959	0.335066	1	Gm12821
ENSMUSG00000095689	1.55318	1.41145	2.65682	0.531256	0.595241	1	Trav12d-1
ENSMUSG00000106262	16.5037	1.41137	0.729392	1.935	0.0529909	0.69256	Gm43375
ENSMUSG00000096710	3.40145	1.41002	1.91762	0.7353	0.462157	1	n-R5s117
ENSMUSG00000089716	20.9112	1.40991	0.785014	1.79603	0.0724897	0.768224	Gm6264
ENSMUSG00000106946	5.07315	1.40951	1.11508	1.26404	0.206215	0.956385	Gm42856
ENSMUSG00000076476	7.89462	1.40921	1.54119	0.914363	0.360526	1	Trbv20
ENSMUSG00000105590	0.722312	1.40812	4.09837	0.34358	0.731162	1	Gm43364
ENSMUSG00000110680	1.08983	1.40794	4.34377	0.324127	0.745842	1	Gm6796
ENSMUSG00000082418	2.63813	1.4077	1.22142	1.15251	0.249111	0.982589	Gm13126
ENSMUSG00000107999	2.3355	1.40603	1.85387	0.758429	0.448194	1	Gm44123
ENSMUSG00000105456	220.886	1.40534	0.472696	2.97303	0.00294873	0.211573	Gm43745
ENSMUSG00000090565	3.03976	1.40436	1.34773	1.04202	0.297404	1	4930405O22Rik
ENSMUSG00000084328	14.1241	1.40356	0.609384	2.30325	0.021265	0.511985	Gm14046
ENSMUSG00000041703	12.7634	1.40071	0.757039	1.85025	0.0642774	0.737665	Zic5
ENSMUSG00000104388	11.8365	1.39973	1.08427	1.29095	0.196722	0.94906	Gm37033
ENSMUSG00000085900	3.01995	1.39943	1.0242	1.36636	0.171825	0.924443	A930041C12Rik
ENSMUSG00000108738	22.2712	1.39874	0.493207	2.83602	0.004568	0.266133	Gm44777
ENSMUSG00000087193	3.56655	1.39847	1.12088	1.24766	0.212157	0.962134	Gm14820
ENSMUSG00000065204	6.69853	1.39844	1.09966	1.2717	0.20348	0.955769	Gm24610
ENSMUSG00000102854	0.707165	1.39836	5.16777	0.270592	0.786704	1	C130023A14Rik
ENSMUSG00000021259	1.56515	1.39776	1.93361	0.722877	0.469755	1	Cyp46a1
ENSMUSG00000043753	12.8074	1.39762	0.874551	1.5981	0.110022	0.850903	Dmrta1
ENSMUSG00000073980	2.37491	1.39676	1.39959	0.997976	0.318291	1	Gm9574
ENSMUSG00000065444	6.69486	1.39644	1.60483	0.870149	0.384219	1	Mir27a
ENSMUSG00000090001	2.59721	1.39627	1.45707	0.958272	0.337925	1	Gm9719
ENSMUSG00000044288	1.9241	1.39587	2.62656	0.531443	0.595112	1	Cnr1
ENSMUSG00000033847	9330.87	1.3949	0.794669	1.75532	0.0792039	0.787086	Pla2g4c
ENSMUSG00000112779	0.786322	1.39429	4.68775	0.297433	0.766136	1	Gm18029
ENSMUSG00000103310	0.558826	1.39396	3.53433	0.394404	0.693283	1	Pcdha12
ENSMUSG00000087819	2.94593	1.39336	1.24142	1.12239	0.261696	0.988522	Gm25117
ENSMUSG00000110259	0.50221	1.39323	3.1438	0.443166	0.657646	1	Olfr65
ENSMUSG00000110928	7.72037	1.39053	0.764588	1.81867	0.0689621	0.755769	AC132474.1
ENSMUSG00000089048	1.80977	1.38905	1.36882	1.01478	0.31021	1	Gm26167
ENSMUSG00000019865	1.56731	1.38825	1.48811	0.932894	0.350875	1	Nmbr
ENSMUSG00000113200	5.58385	1.38759	1.16897	1.18702	0.235219	0.975437	AC153152.1
ENSMUSG00000032572	47.2593	1.38567	1.06214	1.3046	0.192031	0.945062	Col6a4
ENSMUSG00000107320	39.6633	1.38519	0.465027	2.97873	0.00289446	0.209815	Gm42549
ENSMUSG00000030732	21.9236	1.38468	1.65419	0.837074	0.402551	1	Chrdl2
ENSMUSG00000059901	16.6796	1.38432	1.09957	1.25897	0.208041	0.957647	Adamts14
ENSMUSG00000088439	3.26324	1.38396	1.37315	1.00787	0.313515	1	Gm25386
ENSMUSG00000104897	30.5542	1.38358	0.586026	2.36095	0.0182283	0.488796	Gm43203
ENSMUSG00000105199	10.034	1.38301	0.865144	1.59859	0.109912	0.850853	Gm43581
ENSMUSG00000113032	1.49715	1.3823	1.98596	0.696036	0.486406	1	AC158633.2
ENSMUSG00000108778	0.716417	1.38227	5.20998	0.265311	0.79077	1	Gm20083
ENSMUSG00000100023	0.522558	1.38215	5.08416	0.271854	0.785734	1	Gm28753
ENSMUSG00000064844	10.8869	1.38015	0.928606	1.48626	0.13721	0.888796	Gm26202
ENSMUSG00000040797	2.05609	1.3801	2.22495	0.620286	0.535069	1	Iqsec3
ENSMUSG00000030160	2.97561	1.37939	1.35982	1.01439	0.310398	1	Tmem52b
ENSMUSG00000078528	2.07387	1.37935	1.70452	0.809232	0.418382	1	Gm17068
ENSMUSG00000104325	0.810516	1.37722	3.8698	0.355891	0.721923	1	Gm37321
ENSMUSG00000087444	1.41922	1.37667	1.91765	0.71789	0.472825	1	Gm5475
ENSMUSG00000108942	5.74749	1.37665	0.739885	1.86063	0.0627971	0.732892	Gm44660
ENSMUSG00000093598	3.12808	1.37656	1.67866	0.820036	0.412196	1	A730085K08Rik
ENSMUSG00000109428	11.5868	1.37592	1.0061	1.36758	0.171444	0.924443	Gm45698
ENSMUSG00000113918	1.54702	1.37549	2.59746	0.52955	0.596424	1	Gm6566
ENSMUSG00000065643	1.60177	1.37487	2.11589	0.649782	0.515833	1	Gm25897
ENSMUSG00000109245	2.49554	1.37443	1.92264	0.714867	0.474691	1	Gm44860
ENSMUSG00000085253	0.582818	1.37434	5.04871	0.272216	0.785456	1	Gm16833
ENSMUSG00000066363	260.204	1.3737	0.62144	2.21052	0.0270693	0.564829	Serpina3f
ENSMUSG00000105929	10.1025	1.37343	0.940844	1.45978	0.14435	0.898952	Gm43693
ENSMUSG00000090818	3.35496	1.37341	1.17446	1.1694	0.242241	0.979876	Trbj2-6
ENSMUSG00000111108	3.79213	1.37327	1.08439	1.26639	0.205373	0.956385	Gm17795
ENSMUSG00000066756	0.711937	1.37319	4.0196	0.341623	0.732635	1	Igfl3
ENSMUSG00000065490	0.921714	1.37127	3.29058	0.416727	0.676878	1	Mir30c-1
ENSMUSG00000095360	0.659177	1.37068	3.38695	0.404695	0.685702	1	Gm3594
ENSMUSG00000020963	0.912949	1.37068	5.24229	0.261466	0.793733	1	Tshr
ENSMUSG00000066258	13.1479	1.36941	0.840601	1.62908	0.103296	0.840434	Trim12a
ENSMUSG00000103422	0.60972	1.3689	4.06189	0.337011	0.736109	1	Gm37536
ENSMUSG00000105694	12.3364	1.3689	0.912863	1.49956	0.133728	0.8837	Gm43237
ENSMUSG00000094185	29.0874	1.36769	0.448587	3.04889	0.00229691	0.183046	Gm5445
ENSMUSG00000096732	1.88413	1.36757	2.21308	0.617949	0.536609	1	Gm8897
ENSMUSG00000102324	11.2366	1.36737	0.904184	1.51227	0.130465	0.877798	Gm19721
ENSMUSG00000083390	4.50194	1.36553	1.02105	1.33738	0.181099	0.935623	Gm13121
ENSMUSG00000115596	1.77326	1.36548	1.8187	0.750802	0.452772	1	AC122251.2
ENSMUSG00000096343	4.80569	1.36501	1.81967	0.75014	0.453171	1	n-R5s133
ENSMUSG00000080895	3.3017	1.36491	1.46292	0.933005	0.350817	1	Gm11645
ENSMUSG00000038984	3.74133	1.36461	1.06146	1.28559	0.198585	0.950153	Tspyl5
ENSMUSG00000025777	6.99583	1.36448	0.943514	1.44617	0.14813	0.903495	Gdap1
ENSMUSG00000081086	1.203	1.36389	2.57228	0.530226	0.595955	1	Gm9506
ENSMUSG00000077575	5.25698	1.36354	1.21537	1.12191	0.261899	0.988522	Gm24888
ENSMUSG00000071112	17.9597	1.36151	0.574928	2.36814	0.0178779	0.486603	Spx
ENSMUSG00000040554	3.63319	1.36098	0.851601	1.59814	0.110011	0.850903	Aipl1
ENSMUSG00000025433	105.799	1.36098	0.610973	2.22756	0.0259098	0.555593	Crisp3
ENSMUSG00000114855	1.20504	1.36062	2.22304	0.612056	0.540501	1	AC154461.4
ENSMUSG00000025983	4.6809	1.36051	0.846471	1.60727	0.107996	0.847789	Ccdc150
ENSMUSG00000102909	2.86609	1.36012	1.16212	1.17038	0.241846	0.979345	Gm2453
ENSMUSG00000080440	0.485819	1.35969	5.19712	0.261624	0.793611	1	Gm25848
ENSMUSG00000110411	11.5582	1.35956	0.861257	1.57857	0.114434	0.857343	Gm45457
ENSMUSG00000104266	1.38042	1.35915	2.35586	0.576924	0.563991	1	Gm37748
ENSMUSG00000112026	3.48053	1.35901	1.06827	1.27216	0.203316	0.955518	Gm6653
ENSMUSG00000087167	0.457862	1.35854	5.21382	0.260566	0.794427	1	Gm15891
ENSMUSG00000110486	6.94539	1.3573	0.796947	1.70312	0.0885449	0.8117	Gm45877
ENSMUSG00000107971	11.4683	1.35574	0.98224	1.38026	0.167508	0.919983	Gm44260
ENSMUSG00000109782	6.21763	1.35526	1.14965	1.17885	0.238458	0.977296	Gm45728
ENSMUSG00000002688	11.0175	1.35483	1.34556	1.00689	0.313987	1	Prkd1
ENSMUSG00000095737	10.2051	1.35345	1.81746	0.744694	0.456457	1	Igkv11-125
ENSMUSG00000098322	8.76514	1.35335	1.08497	1.24736	0.212265	0.962134	5830468F06Rik
ENSMUSG00000104402	2.45676	1.35325	1.55785	0.868664	0.385031	1	Gm38012
ENSMUSG00000105457	7.03576	1.3518	0.945977	1.429	0.153005	0.909195	Gm43200
ENSMUSG00000030468	130.218	1.35133	0.831109	1.62594	0.103963	0.841594	Siglecg
ENSMUSG00000107688	2.50956	1.35108	1.58044	0.854874	0.392621	1	Gm44091
ENSMUSG00000106785	0.938777	1.35102	1.75159	0.771309	0.440524	1	Gm42713
ENSMUSG00000051920	2.45333	1.34995	5.22107	0.258559	0.795976	1	Rspo2
ENSMUSG00000096854	0.417916	1.3498	5.23184	0.257998	0.796409	1	Ifnz
ENSMUSG00000000204	16093.1	1.34948	0.534688	2.52387	0.0116071	0.412103	Slfn4
ENSMUSG00000111424	4.05337	1.34924	1.41099	0.956235	0.338954	1	AC159308.2
ENSMUSG00000086151	0.601853	1.34907	3.54395	0.380669	0.703449	1	Gm5698
ENSMUSG00000108238	9.80185	1.3476	1.40919	0.956296	0.338923	1	Gm43984
ENSMUSG00000113423	0.439049	1.34733	4.44208	0.303311	0.761653	1	Gm3791
ENSMUSG00000076472	18.0371	1.34724	0.830556	1.62209	0.104784	0.843392	Trbv15
ENSMUSG00000074643	3.95219	1.34723	1.32082	1.02	0.307729	1	Cpne1
ENSMUSG00000090027	0.784427	1.34685	4.04924	0.332617	0.739423	1	Gm15740
ENSMUSG00000094491	29.7828	1.34616	1.5922	0.845469	0.397849	1	Igkv1-133
ENSMUSG00000028255	564635	1.34531	1.07401	1.25261	0.210348	0.959954	Clca1
ENSMUSG00000095015	2.39167	1.3451	1.16755	1.15207	0.249292	0.982589	Gm16434
ENSMUSG00000085653	1.52434	1.34441	1.90834	0.704495	0.481125	1	Gm15179
ENSMUSG00000103579	3.1328	1.34422	1.31197	1.02458	0.305562	1	Gm37113
ENSMUSG00000115224	1.48524	1.344	2.06775	0.649984	0.515702	1	AC115735.1
ENSMUSG00000113643	3.08871	1.34368	1.31004	1.02568	0.305044	1	Gm40598
ENSMUSG00000084587	1.04672	1.34367	5.22788	0.257021	0.797163	1	n-R5s174
ENSMUSG00000113259	1.73399	1.34344	1.60898	0.834964	0.403738	1	Gm35190
ENSMUSG00000019913	0.570765	1.34339	5.11382	0.262698	0.792783	1	Sim1
ENSMUSG00000097178	1.81839	1.34238	1.66727	0.805135	0.420742	1	2310002F09Rik
ENSMUSG00000113379	1.16398	1.3421	2.45018	0.547757	0.583859	1	Gm46436
ENSMUSG00000083252	0.689943	1.34175	2.28888	0.586206	0.557737	1	Gm13210
ENSMUSG00000105801	1.31743	1.34173	3.4196	0.392364	0.694789	1	C430019N01Rik
ENSMUSG00000093409	2.53613	1.34052	1.44729	0.926227	0.354328	1	Gm25193
ENSMUSG00000086504	1.37238	1.34039	1.81984	0.736541	0.461402	1	Kif16bos
ENSMUSG00000087938	4.82623	1.33998	1.07661	1.24463	0.213268	0.962496	Gm26049
ENSMUSG00000031297	5.90083	1.33889	1.38726	0.965129	0.33448	1	Slc7a3
ENSMUSG00000042678	3.31833	1.33724	0.981733	1.36212	0.173159	0.927243	Myo15
ENSMUSG00000038421	143.073	1.33658	1.01767	1.31336	0.18906	0.942394	Fcrla
ENSMUSG00000114612	1.60871	1.33546	1.63419	0.817199	0.413815	1	AC129085.3
ENSMUSG00000031896	125.136	1.3349	0.652985	2.04431	0.0409232	0.646763	Ctrl
ENSMUSG00000113149	4.81376	1.33486	1.96233	0.680242	0.496351	1	AC099934.3
ENSMUSG00000101614	1.99073	1.33337	1.58927	0.838978	0.401481	1	Gm29547
ENSMUSG00000083362	2.79433	1.33328	1.83086	0.728225	0.466476	1	Gm8606
ENSMUSG00000025586	14.4274	1.33206	0.536924	2.48091	0.0131046	0.430307	Cpeb1
ENSMUSG00000069998	0.923789	1.3315	4.52823	0.294045	0.768724	1	Olfr372
ENSMUSG00000107083	6.39948	1.33142	1.22021	1.09113	0.275214	0.996712	Gm43313
ENSMUSG00000103522	0.959145	1.33113	5.21175	0.255409	0.798407	1	9430087J23Rik
ENSMUSG00000032595	2.70387	1.33054	2.10149	0.63314	0.526642	1	Cdhr4
ENSMUSG00000034209	2.6412	1.33046	1.70105	0.782145	0.434129	1	Rasl10a
ENSMUSG00000106443	2.69246	1.33012	1.7333	0.767391	0.442849	1	Gm42702
ENSMUSG00000076581	1.05618	1.32995	3.32947	0.399447	0.689564	1	Igkv8-26
ENSMUSG00000022416	31.4121	1.32949	1.31631	1.01001	0.312489	1	Cacna1i
ENSMUSG00000076438	30.1754	1.32949	0.67827	1.96012	0.0499819	0.680864	Oxct2b
ENSMUSG00000019933	3.55149	1.32923	1.18605	1.12072	0.262408	0.989287	Mrln
ENSMUSG00000082855	3.86783	1.32893	1.29071	1.02961	0.303194	1	Gm14537
ENSMUSG00000109729	36.1823	1.32858	0.555799	2.39041	0.0168297	0.475589	Gm45418
ENSMUSG00000079143	1.53328	1.32803	1.93343	0.68688	0.492158	1	Atxn7l1os1
ENSMUSG00000089317	13.6395	1.32786	0.69561	1.90891	0.0562739	0.70682	Snord123
ENSMUSG00000084899	52.0484	1.32773	0.598038	2.22015	0.0264087	0.558859	Gm15344
ENSMUSG00000103369	1.31911	1.32709	1.87778	0.706736	0.479731	1	Gm6546
ENSMUSG00000020295	1.38242	1.32707	3.34483	0.396753	0.69155	1	Hbq1a
ENSMUSG00000059434	7.26833	1.32705	0.897497	1.47861	0.139245	0.890375	Gckr
ENSMUSG00000113841	17.461	1.32649	0.618246	2.14557	0.0319075	0.59624	AC122357.3
ENSMUSG00000114557	0.789518	1.32636	4.89096	0.271186	0.786248	1	AC154220.1
ENSMUSG00000105362	2.92776	1.32553	1.34768	0.983562	0.325331	1	Gm43474
ENSMUSG00000109268	1.34596	1.32523	1.67829	0.789634	0.429742	1	9530078K11Rik
ENSMUSG00000041700	3.1575	1.32355	1.16699	1.13415	0.25673	0.985242	Lhfpl1
ENSMUSG00000084789	0.583283	1.32292	5.01783	0.263645	0.792054	1	Gm12974
ENSMUSG00000040270	296.863	1.32196	0.489247	2.70202	0.00689191	0.33107	Bach2
ENSMUSG00000025479	32.1518	1.32134	1.0842	1.21873	0.222947	0.968127	Cyp2e1
ENSMUSG00000103493	4.96494	1.3209	0.951134	1.38876	0.164906	0.918265	Gm37411
ENSMUSG00000100536	1.8375	1.32089	2.68194	0.492511	0.622358	1	Gm28873
ENSMUSG00000089525	3.36374	1.32075	1.12711	1.1718	0.241278	0.979345	Gm23833
ENSMUSG00000083551	1.6862	1.32066	1.28972	1.02399	0.305842	1	Gm14516
ENSMUSG00000104997	1.70853	1.3194	1.4049	0.939146	0.347656	1	Gm44350
ENSMUSG00000084433	11.8905	1.31919	0.803699	1.6414	0.100715	0.836661	Gm25945
ENSMUSG00000020884	6.13048	1.31863	1.02304	1.28894	0.19742	0.949607	Asgr1
ENSMUSG00000032346	2.72458	1.31857	1.98744	0.663452	0.507041	1	Ooep
ENSMUSG00000104780	7.18609	1.31848	0.793733	1.66112	0.0966898	0.83036	Gm19843
ENSMUSG00000071553	146.582	1.31828	0.517622	2.5468	0.0108715	0.402831	Cpa2
ENSMUSG00000085103	1.1118	1.31775	2.43099	0.542061	0.587776	1	Gm16357
ENSMUSG00000110844	1.04583	1.31575	2.52143	0.521827	0.60179	1	AC127581.1
ENSMUSG00000108897	2.32027	1.31552	2.07253	0.634739	0.525598	1	Gm44861
ENSMUSG00000051590	5.4343	1.3155	1.77699	0.740297	0.45912	1	Map3k19
ENSMUSG00000096410	6.22782	1.31547	1.88319	0.698531	0.484845	1	Ighv1-19
ENSMUSG00000094657	4.922	1.3153	1.50968	0.871247	0.38362	1	n-R5s142
ENSMUSG00000105230	0.45123	1.31501	5.23855	0.251026	0.801794	1	Gm42433
ENSMUSG00000093176	3.83147	1.31487	1.04599	1.25706	0.208733	0.958606	Mir5119
ENSMUSG00000098004	0.904716	1.31322	2.53782	0.517461	0.604835	1	Gm27027
ENSMUSG00000107379	3.96835	1.31155	1.20564	1.08784	0.276664	0.998	Gm43126
ENSMUSG00000031772	1.1792	1.31112	5.22059	0.251145	0.801702	1	Cntnap4
ENSMUSG00000112271	1.52015	1.31107	1.91952	0.683022	0.494593	1	Gm9088
ENSMUSG00000098052	0.726088	1.31044	5.24258	0.249962	0.802617	1	Gm5300
ENSMUSG00000061852	82.3654	1.31001	0.545602	2.40103	0.0163491	0.472347	Gm7582
ENSMUSG00000050010	3.95487	1.30996	1.74099	0.752425	0.451796	1	Shisa3
ENSMUSG00000092495	5.93311	1.30977	1.64269	0.797333	0.425258	1	Gm20405
ENSMUSG00000108236	0.657217	1.30967	5.02497	0.260633	0.794376	1	0610033M10Rik
ENSMUSG00000101678	11.2438	1.30958	0.763697	1.71479	0.0863832	0.806301	Gm29609
ENSMUSG00000082122	0.646658	1.30899	4.88517	0.267951	0.788737	1	Gm11809
ENSMUSG00000064225	2.52908	1.30876	2.01441	0.649701	0.515885	1	Paqr9
ENSMUSG00000031898	0.97657	1.30825	4.36599	0.299645	0.764448	1	Dpep3
ENSMUSG00000094382	1.65472	1.30687	1.67596	0.779777	0.435522	1	Gm22192
ENSMUSG00000081985	0.536651	1.30623	5.14129	0.254067	0.799444	1	Gng2-ps1
ENSMUSG00000061561	1.24989	1.30548	2.69409	0.48457	0.627982	1	Olfr373
ENSMUSG00000102570	16.4186	1.30521	0.73341	1.77964	0.0751348	0.777201	Gm37968
ENSMUSG00000092465	1.74142	1.30457	1.36811	0.953557	0.340308	1	Gm20472
ENSMUSG00000105662	0.523822	1.30284	5.18482	0.251279	0.801598	1	Gm6639
ENSMUSG00000113762	4.04032	1.30281	1.63979	0.794501	0.426904	1	AC122327.3
ENSMUSG00000098217	0.838683	1.30261	2.13105	0.611256	0.54103	1	Gm27046
ENSMUSG00000081492	2.49425	1.3026	1.36492	0.954341	0.339911	1	Gm9311
ENSMUSG00000082178	1.2813	1.30257	2.2552	0.577583	0.563546	1	Gm11307
ENSMUSG00000102571	6.31584	1.3024	1.23268	1.05656	0.290711	1	Gm37967
ENSMUSG00000039419	4.35367	1.30086	1.62679	0.799652	0.423913	1	Cntnap2
ENSMUSG00000113206	0.461923	1.30044	5.20923	0.249641	0.802865	1	Gm3742
ENSMUSG00000039146	2216.58	1.29991	0.427002	3.04428	0.00233236	0.184224	Ifi44l
ENSMUSG00000109038	11.5807	1.29924	1.03102	1.26015	0.207617	0.957536	Gm45120
ENSMUSG00000109119	0.838386	1.29854	4.94102	0.262808	0.792699	1	Gm44752
ENSMUSG00000021207	10.858	1.29805	1.16695	1.11234	0.265992	0.990627	Akr1c21
ENSMUSG00000022935	1.60496	1.29709	2.53647	0.511376	0.609087	1	Grik1
ENSMUSG00000105434	9.79269	1.29643	1.07895	1.20157	0.229531	0.970272	Gm43359
ENSMUSG00000109719	14.7372	1.29608	0.534454	2.42506	0.0153059	0.460124	Gm45266
ENSMUSG00000109620	5.98799	1.29546	0.883101	1.46694	0.142392	0.895567	AC102287.1
ENSMUSG00000106681	0.953364	1.29528	3.04777	0.424991	0.670843	1	Gm43004
ENSMUSG00000081848	2.22752	1.29478	1.40377	0.922364	0.356339	1	Gm14925
ENSMUSG00000031312	13.0615	1.29448	0.698093	1.85431	0.0636947	0.736608	Itgb1bp2
ENSMUSG00000096111	2.98442	1.29413	1.1751	1.1013	0.270767	0.991909	Gm21917
ENSMUSG00000028226	1.76435	1.29364	2.92098	0.44288	0.657853	1	Mmp16
ENSMUSG00000094760	6.45763	1.29309	1.50676	0.858195	0.390785	1	n-R5s139
ENSMUSG00000068105	137.036	1.29306	0.809217	1.59792	0.110061	0.850971	Tnfrsf13c
ENSMUSG00000095749	2.67335	1.29301	1.98563	0.651187	0.514926	1	n-R5s141
ENSMUSG00000113476	1.06968	1.29281	1.63976	0.788414	0.430454	1	AC154517.2
ENSMUSG00000053825	2.15997	1.29281	1.35501	0.954092	0.340037	1	Ppfia2
ENSMUSG00000048915	10.9261	1.29206	1.28572	1.00493	0.314928	1	Efna5
ENSMUSG00000074934	437.869	1.2911	1.47474	0.875474	0.381316	1	Grem1
ENSMUSG00000086194	0.686306	1.29101	5.23014	0.246839	0.805032	1	Gm16329
ENSMUSG00000104346	10.5203	1.28999	0.709288	1.8187	0.0689566	0.755769	Pcdhga3
ENSMUSG00000080645	3.56139	1.28905	0.981301	1.31361	0.188977	0.942211	Mir1198
ENSMUSG00000115771	2.41169	1.28868	1.04875	1.22878	0.219156	0.966342	AC122035.2
ENSMUSG00000113411	6.83281	1.28699	0.738234	1.74334	0.0812748	0.793184	AC134254.4
ENSMUSG00000103366	2.28724	1.28674	1.3208	0.974209	0.329953	1	C630004L07Rik
ENSMUSG00000058976	0.440544	1.28659	5.18404	0.248183	0.803993	1	Usp17lc
ENSMUSG00000053930	1.33011	1.28551	1.75081	0.734235	0.462806	1	Shisa6
ENSMUSG00000081551	1.07795	1.28454	2.29079	0.56074	0.574975	1	Gm14654
ENSMUSG00000111358	0.821741	1.28347	4.58693	0.279811	0.779623	1	2900078I11Rik
ENSMUSG00000113532	1.4149	1.28333	2.25966	0.567929	0.570083	1	AC156037.1
ENSMUSG00000075307	8.90769	1.28293	0.652165	1.96719	0.0491616	0.678469	Klhl41
ENSMUSG00000005583	161.086	1.28286	1.02098	1.2565	0.208936	0.958606	Mef2c
ENSMUSG00000076608	9.23626	1.28174	1.54902	0.827451	0.407982	1	Igkj5
ENSMUSG00000095675	114.034	1.28031	1.0049	1.27407	0.202637	0.954395	Ccl21b
ENSMUSG00000114018	3.28678	1.2802	1.43886	0.889738	0.373607	1	Gm36495
ENSMUSG00000087314	6.43166	1.27925	0.933119	1.37094	0.170394	0.923283	Prkag2os2
ENSMUSG00000107835	2.84549	1.27793	1.7989	0.710398	0.477457	1	Gm43999
ENSMUSG00000092035	13.7497	1.27789	0.886239	1.44192	0.149324	0.905058	Peg10
ENSMUSG00000105646	31.4311	1.27738	1.11247	1.14823	0.250873	0.983117	Gm30211
ENSMUSG00000108723	0.854032	1.27647	3.03803	0.420163	0.674366	1	Gm44837
ENSMUSG00000047591	1.34053	1.27647	3.14206	0.406252	0.684558	1	Mafa
ENSMUSG00000088151	2.16855	1.27635	1.46392	0.871874	0.383277	1	Gm26347
ENSMUSG00000114598	2.63342	1.27526	1.44672	0.881478	0.378059	1	AC129085.2
ENSMUSG00000098588	5.50118	1.27516	1.40726	0.906132	0.364866	1	Mir6340
ENSMUSG00000027886	0.910843	1.27468	2.1754	0.585953	0.557907	1	1700013F07Rik
ENSMUSG00000103760	19.1474	1.27397	0.515631	2.4707	0.0134847	0.43706	Gm8009
ENSMUSG00000085604	6.84301	1.27279	1.1868	1.07245	0.283518	1	Dhx58os
ENSMUSG00000085936	1.35787	1.27205	3.3837	0.375935	0.706965	1	2610307P16Rik
ENSMUSG00000104900	8.75264	1.27192	0.782711	1.62501	0.10416	0.841594	4930596I21Rik
ENSMUSG00000115210	1.47397	1.27148	1.83677	0.692233	0.488791	1	AC120375.1
ENSMUSG00000109821	2.50077	1.27133	1.53627	0.827545	0.407928	1	Gm6593
ENSMUSG00000029193	6.47976	1.27041	1.03699	1.22509	0.220541	0.968059	Cckar
ENSMUSG00000048031	25.4485	1.26968	0.90205	1.40755	0.159264	0.915032	Fcrl5
ENSMUSG00000041556	9.68606	1.2694	0.617569	2.05549	0.0398319	0.642422	Fbxo2
ENSMUSG00000089657	8.25869	1.26925	1.21035	1.04866	0.294335	1	Gm16585
ENSMUSG00000110779	6.12083	1.26835	0.739591	1.71493	0.0863581	0.806301	AC116726.1
ENSMUSG00000105392	7.32778	1.26833	0.938185	1.3519	0.176408	0.929697	Gm42684
ENSMUSG00000113883	0.620132	1.26773	5.07189	0.249952	0.802625	1	Gm36500
ENSMUSG00000103062	7.22812	1.26646	1.05244	1.20335	0.22884	0.970206	Gm37200
ENSMUSG00000114193	34.8115	1.26597	0.694886	1.82184	0.0684792	0.753934	AC122828.3
ENSMUSG00000006574	3.35231	1.26492	2.00328	0.631426	0.527762	1	Slc4a1
ENSMUSG00000087785	5.65763	1.26378	1.00418	1.25852	0.208203	0.958021	Gm23172
ENSMUSG00000108618	5.99506	1.26378	0.866496	1.4585	0.144704	0.900094	Gm44816
ENSMUSG00000103114	1.23592	1.26328	2.59207	0.487363	0.626001	1	Gm32200
ENSMUSG00000055323	11.1196	1.26223	1.19516	1.05612	0.290913	1	Gm9967
ENSMUSG00000114409	5.68132	1.26123	0.825188	1.52842	0.126408	0.87423	AC117769.3
ENSMUSG00000037737	0.838381	1.26058	3.2703	0.385463	0.699895	1	Actrt3
ENSMUSG00000090881	56.4776	1.26057	0.584066	2.15827	0.0309071	0.589192	Gm6904
ENSMUSG00000027246	7.45039	1.26036	0.872072	1.44525	0.148388	0.903723	Ell3
ENSMUSG00000095088	1.13404	1.26029	4.46931	0.281988	0.777953	1	Trav11d
ENSMUSG00000102243	19.2361	1.26029	0.506687	2.48731	0.0128712	0.428544	Gm37718
ENSMUSG00000106754	1.01032	1.25978	5.24203	0.240322	0.81008	1	Gm43101
ENSMUSG00000087121	4.01833	1.25938	1.04209	1.20852	0.226848	0.969139	Gm7847
ENSMUSG00000108858	7.41528	1.25874	0.781681	1.6103	0.107332	0.847056	Gm4587
ENSMUSG00000064412	1.81003	1.2587	1.86383	0.675331	0.499465	1	Gm22246
ENSMUSG00000110558	5.64245	1.25861	1.45134	0.867209	0.385828	1	Gm45779
ENSMUSG00000104723	1.1738	1.25859	2.7723	0.453988	0.649837	1	Gm43106
ENSMUSG00000082072	11.6116	1.25823	0.598645	2.10179	0.0355714	0.617824	Gm15785
ENSMUSG00000078673	1.0956	1.25717	5.23458	0.240166	0.810202	1	Mup19
ENSMUSG00000101171	0.682752	1.25694	5.24093	0.239832	0.810461	1	Gm7593
ENSMUSG00000029510	11.881	1.25665	0.871723	1.44157	0.149425	0.905058	Gpc2
ENSMUSG00000095756	2.26897	1.25578	1.70159	0.738004	0.460512	1	Trav6d-7
ENSMUSG00000107531	17.2465	1.25527	0.685858	1.83021	0.067218	0.751341	E330037G11Rik
ENSMUSG00000106288	2.32137	1.25342	2.02108	0.620173	0.535144	1	Gm43593
ENSMUSG00000085875	6.16117	1.25253	0.886272	1.41326	0.15758	0.913056	Gm12905
ENSMUSG00000114114	1.60431	1.25248	1.42117	0.881298	0.378156	1	AC154368.2
ENSMUSG00000081951	1.12268	1.25212	2.58504	0.484374	0.628121	1	Gm15352
ENSMUSG00000104546	53.3439	1.25206	0.531197	2.35705	0.0184206	0.489567	Gm43858
ENSMUSG00000108356	43.981	1.25172	1.80211	0.694588	0.487314	1	9130221F21Rik
ENSMUSG00000084693	7.54907	1.25134	0.854365	1.46464	0.143019	0.89616	Gm24894
ENSMUSG00000113335	1.43869	1.25077	2.17942	0.573899	0.566036	1	AC166349.1
ENSMUSG00000094231	3.1525	1.25049	1.63992	0.762535	0.445741	1	Trav9n-4
ENSMUSG00000034842	13.3693	1.24971	0.918322	1.36086	0.173557	0.927243	Art3
ENSMUSG00000062073	10.7241	1.24965	0.748491	1.66956	0.0950059	0.828515	Gm10109
ENSMUSG00000086140	16.708	1.24963	0.638299	1.95776	0.0502586	0.682443	Hnf1aos2
ENSMUSG00000098832	1.87666	1.2492	1.89868	0.657932	0.510582	1	Kdm4dl
ENSMUSG00000073494	7.87287	1.24881	0.974476	1.28152	0.20001	0.951105	Sh2d1b2
ENSMUSG00000099954	0.544392	1.24843	5.22939	0.238734	0.811312	1	Gm28112
ENSMUSG00000065685	0.552896	1.24822	5.24388	0.238034	0.811855	1	Gm23732
ENSMUSG00000112043	0.492666	1.24822	2.82451	0.441924	0.658544	1	AC110816.1
[truncated: 26,199 more rows]

## Sheet: C. Wt colitis vs Wt ut
Reference Number	baseMean	log2FoldChange	lfcSE	stat	p-value	p adj	gene name		NF-κB target genes (overlap)
ENSMUSG00000110556	0.93887	59.793	5.30323	11.2748	1.74719e-29		Gm45762		A4
ENSMUSG00000059014	0.979116	58.5337	5.3485	10.9439	7.10372e-28		Gm5409		ABCA1
ENSMUSG00000113479	0.978435	54.5375	5.33679	10.2192	1.62755e-24		AC068459.1		ABCB1
ENSMUSG00000082648	1.00101	51.837	5.34484	9.69852	3.05894e-22		Gm11366		ABCB4
ENSMUSG00000101778	0.501476	50.6168	5.34646	9.46736	2.87013e-21		Gm29488		ABCB9
ENSMUSG00000083153	1.40312	46.8171	5.25947	8.90149	5.51013e-19		Gm12459		ABCC6
ENSMUSG00000030976	0.875344	45.3606	5.32992	8.51056	1.73098e-17		Tex36		ABCG5
ENSMUSG00000107486	0.836185	39.0973	5.35689	7.29852	2.90951e-13		Trbv4		ABCG8
ENSMUSG00000085573	0.571618	39.0343	5.35813	7.28506	3.21522e-13		Gm15418		ADH1A
ENSMUSG00000106897	0.56742	38.5858	5.35496	7.20563	5.77776e-13		Gm43027		ADORA1
ENSMUSG00000000411	0.450501	38.2014	5.36124	7.12547	1.03725e-12		Tssk3		AFP
ENSMUSG00000058250	0.404192	38.1993	5.33669	7.15785	8.19519e-13		Tas2r138		AGER
ENSMUSG00000097263	0.731744	37.3329	5.35257	6.97475	3.06417e-12		Gm26804		AGT
ENSMUSG00000097235	0.896351	36.9958	5.32371	6.94926	3.67214e-12		Gm17250		AHCTF1
ENSMUSG00000036095	1.6587	36.5098	5.31867	6.86447	6.67407e-12		Dgkb		AICDA
ENSMUSG00000032523	0.929766	36.3414	5.36219	6.77733	1.22414e-11		Hhatl		AKR1C1
ENSMUSG00000110146	0.710761	34.6875	5.30134	6.54315	6.02349e-11		Gm45487		ALOX12
ENSMUSG00000094484	0.447183	33.478	5.35656	6.24991	4.10683e-10		Gm21244		ALOX5
ENSMUSG00000097928	1.94713	32.6677	5.35757	6.09748	1.07752e-09		Gm26578		AMACR
ENSMUSG00000108308	0.670283	31.8486	5.33845	5.96588	2.43317e-09		Gm45218		AMF
ENSMUSG00000033860	7.2129	29.7219	5.35425	5.55108	2.83906e-08		Fgg		ANGPT1
ENSMUSG00000000889	1.65041	29.7136	5.35357	5.55024	2.8527e-08		Dbh		APHA1
ENSMUSG00000020524	0.830253	28.2722	5.35434	5.28024	1.29017e-07		Gria1		APOBEC2
ENSMUSG00000076571	7.0291	27.7635	4.48698	6.18756	6.11011e-10		Igkv5-37		APOC3
ENSMUSG00000096355	0.881891	25.5803	5.35414	4.77767	1.77336e-06		Ighv8-4		APOD
ENSMUSG00000029755	0.871091	25.3319	4.80246	5.27478	1.32915e-07		Dlx5		APOE
ENSMUSG00000057715	0.743081	24.6391	5.34064	4.6135	3.95941e-06		A830018L16Rik		AQP4
ENSMUSG00000073805	0.52456	24.4906	5.30232	4.61884	3.85899e-06		Fam196a		AR
ENSMUSG00000036557	0.494895	24.3246	5.36546	4.53356	5.79989e-06		Stpg4		ARFRP1
ENSMUSG00000038583	2.92289	24.2229	3.86564	6.26621	3.69942e-10		Pln		ARODA2A
ENSMUSG00000107593	0.870802	23.8781	5.33215	4.47814	7.52973e-06		Gm44097		ART1
ENSMUSG00000101603	0.730048	23.4411	4.11728	5.69336	1.24567e-08		Gm28730		ASPH
ENSMUSG00000100277	0.798621	22.864	4.18488	5.46346	4.66938e-08		1810053B23Rik		ASS1
ENSMUSG00000105629	1.47536	22.5922	4.44799	5.0792	3.79031e-07		Trav7n-5		BACE1
ENSMUSG00000086842	0.48564	22.4126	5.35015	4.18915	2.79999e-05		Gm15681		BAX
ENSMUSG00000073938	0.75812	22.2651	3.51351	6.337	2.34278e-10		Olfr632		BCL2A1
ENSMUSG00000094293	0.708254	22.2545	5.33715	4.16973	3.04957e-05		Gm3893		BCL2BCL2C11
ENSMUSG00000113334	1.19204	22.2327	3.79262	5.86209	4.57068e-09		D030007L05Rik		BCL2L1
ENSMUSG00000112112	1.85863	21.593	4.83364	4.46725	7.92325e-06		AC154300.1		BCL3
ENSMUSG00000066072	1.5693	21.11	4.42811	4.76727	1.86736e-06		Cyp4a10		BDKRB1
ENSMUSG00000078531	0.547823	20.96	4.35026	4.81811	1.44926e-06		Gm831		BDKRB1
ENSMUSG00000083720	0.54849	20.443	5.32578	3.8385	0.000123789		Gm12901		BDNF
ENSMUSG00000105876	0.554851	19.9928	5.36903	3.72373	0.000196303		Gm43572		BGN
ENSMUSG00000083956	0.446291	19.6096	5.32469	3.68276	0.000230721		Gm12361		BLIMP1
ENSMUSG00000082129	1.28235	19.3354	2.99179	6.46281	1.02773e-10		Gm14502		BLNK
ENSMUSG00000087600	0.866305	19.3278	4.65287	4.15396	3.26773e-05		Pmepa1os		BLR1
ENSMUSG00000089185	0.729393	19.2782	5.35472	3.60022	0.000317947		Gm22940		BMI1
ENSMUSG00000106596	0.64979	19.1601	5.14685	3.72269	0.00019711		Gm42822		BMP2
ENSMUSG00000107574	0.432879	18.6396	5.32721	3.49894	0.00046712		Gm17834		BMP4
ENSMUSG00000081731	0.936321	18.4804	3.46628	5.33147	9.74207e-08		Calr-ps		BNIP3
ENSMUSG00000094066	0.665771	18.2329	4.19012	4.3514	1.35271e-05		Fam205a2		BRCA2
ENSMUSG00000104272	3.28235	18.1694	1.96403	9.25105	2.22295e-20		Gm38297		BTK
ENSMUSG00000027443	0.704428	18.0658	5.34771	3.37824	0.000729521		Cst12		C3
ENSMUSG00000082962	0.917908	17.7876	4.15278	4.28331	1.84137e-05		Gm10601		C4BPA
ENSMUSG00000076518	62.1772	17.7304	2.48995	7.12078	1.07316e-12	4.99069e-10	Igkv2-112		C69
ENSMUSG00000069044	2.72472	17.5389	5.33678	3.28641	0.00101472		Usp9y		CALCB
ENSMUSG00000104961	0.936984	17.416	3.45249	5.04446	4.54806e-07		Gm43835		CASP4
ENSMUSG00000102139	0.725545	17.257	5.36425	3.21703	0.00129523		Gm37109		CAV1
ENSMUSG00000112877	0.967551	16.5686	4.64184	3.5694	0.0003578		AC174742.1		CCL1
ENSMUSG00000106630	5.44121	16.5657	2.89994	5.71241	1.11387e-08		Igkv2-116		CCL15
ENSMUSG00000074115	46212.1	16.4855	1.61109	10.2325	1.41766e-24	1.41745e-20	Saa1		CCL17
ENSMUSG00000090574	1.57962	16.381	2.64268	6.19863	5.6958e-10		Traj61		CCL19
ENSMUSG00000106607	0.872971	15.9561	4.02819	3.9611	7.4604e-05		Gm43178		CCL2
ENSMUSG00000092323	0.870418	15.7873	5.3059	2.97542	0.00292583		BB365896		CCL20
ENSMUSG00000070908	0.574205	15.571	5.34861	2.91123	0.0036001		Gm13288		CCL22
ENSMUSG00000041358	1.00347	15.5638	3.3294	4.67466	2.94439e-06		Nutm1		CCL23
ENSMUSG00000026805	0.548682	14.9481	5.2958	2.82264	0.00476306		Barhl1		CCL28
ENSMUSG00000103358	1.42091	14.9105	3.96897	3.75677	0.000172118		Gm37593		CCL3
ENSMUSG00000102786	4.9825	14.8855	1.90109	7.83003	4.87768e-15		Gm38252		CCL4
ENSMUSG00000102515	1.63567	14.8549	3.56787	4.16354	3.13355e-05		Ighv12-2		CCL5
ENSMUSG00000081907	0.550798	14.5689	5.30337	2.7471	0.00601255		Gm13731		CXCL12
ENSMUSG00000108750	0.922378	12.6982	2.79538	4.54255	5.55777e-06		Gm44750		CCND1
ENSMUSG00000099075	1.306	12.6622	2.49946	5.06598	4.06306e-07		Mir7674		CCND2
ENSMUSG00000112887	0.566611	12.3248	5.34389	2.30633	0.0210922		AC155258.1		CCR5
ENSMUSG00000115480	1.84173	12.0658	3.44101	3.50646	0.000454115		AC132833.1		CCR7
ENSMUSG00000092374	0.751043	12.0512	3.15778	3.81636	0.000135437		Gm6623		CD2
ENSMUSG00000095387	4.27712	12.0176	2.3491	5.11582	3.12382e-07		Trav6d-4		CD209
ENSMUSG00000035456	1.11066	11.3247	4.01546	2.82029	0.00479809		Prdm8		CD23
ENSMUSG00000061524	0.644726	11.0955	5.29732	2.09456	0.0362102		Zic2		CD274
ENSMUSG00000113909	0.55996	10.9015	5.29526	2.05872	0.039521		Gm36377		CD38
ENSMUSG00000093687	0.5639	10.8626	5.30779	2.04653	0.0407042		Gm20637		CD3G
ENSMUSG00000038760	0.456889	10.2991	5.30742	1.94052	0.0523167		Trhr		CD3G
ENSMUSG00000097580	0.441887	10.0119	5.32308	1.88084	0.0599931		Gm5432		CD40
ENSMUSG00000038541	97.9942	9.93983	1.53067	6.49376	8.37224e-11	1.94674e-08	Srd5a2		CD40LG
ENSMUSG00000085202	0.886659	9.93106	4.55805	2.1788	0.0293467		Gm15620		CD44
ENSMUSG00000066383	0.526055	9.78212	5.28871	1.84962	0.0643678		Iqcf1		CD48
ENSMUSG00000017733	0.725567	9.53988	5.29711	1.80096	0.0717092		Eppin		CD54
ENSMUSG00000104118	0.722697	9.50054	4.31355	2.20249	0.0276308		Gm37298		CD80
ENSMUSG00000113029	0.75428	9.32055	4.26811	2.18377	0.0289795		Gm40578		CD86
ENSMUSG00000060177	339.99	8.75393	1.22174	7.16511	7.77267e-13	3.79098e-10	Klk1b22		CDK6
ENSMUSG00000057465	261.857	8.59471	0.926354	9.27799	1.72704e-20	4.31695e-17	Saa2		CDKNIA
ENSMUSG00000115686	0.741471	8.4154	4.11481	2.04515	0.0408401		AC154528.2		CDX1
ENSMUSG00000105235	1.17781	8.294	3.25982	2.54431	0.0109494		Hcfc1r1-ps1		CEBPD
ENSMUSG00000115779	2.23134	7.90328	2.04355	3.86743	0.000109986		AC158954.1		CFB
ENSMUSG00000080709	0.514468	7.88928	5.31134	1.48536	0.137447		Gm14324		CFB
ENSMUSG00000099796	0.578152	7.70601	5.34922	1.44059	0.149702		Gm7893		CFLAR
ENSMUSG00000093156	0.567592	7.38341	4.38709	1.68298	0.092378		Mir3076		CGM2
ENSMUSG00000113910	0.582385	7.2435	5.11651	1.41571	0.15686		AC160972.1		CHI3L1
ENSMUSG00000005681	4.11811	6.88624	5.32027	1.29434	0.195548		Apoa2		CIDEA
ENSMUSG00000110283	0.543812	6.85579	5.28729	1.29666	0.19475		Gm45249		CLDN2
ENSMUSG00000089943	5.01488	6.81267	1.72571	3.94776	7.88862e-05		Ugt1a5		COL1A2
ENSMUSG00000073652	1.84564	6.54271	3.06522	2.1345	0.0328021		Apol7d		CR2
ENSMUSG00000078302	0.823358	6.47973	5.29035	1.22482	0.220642		Foxd1		CREB3
ENSMUSG00000035861	3.00262	6.44021	5.25113	1.22644	0.220032		Tmprss11b		CRPHAMP
ENSMUSG00000045010	20.9958	6.19203	2.67876	2.31153	0.0208035	0.0774401	Gm4779		CSF1
ENSMUSG00000063446	1.62465	6.18558	4.42499	1.39788	0.162151		Plppr1		CSF2
ENSMUSG00000020051	1.60547	6.13442	5.30055	1.15732	0.247143		Pah		CSF5
ENSMUSG00000111528	0.57031	5.7954	5.30573	1.09229	0.274706		Gm39460		CTSB
ENSMUSG00000076031	143.925	5.78464	0.814801	7.09945	1.25256e-12	5.56608e-10	Gm22751		CTSL
ENSMUSG00000040017	11.2788	5.66276	1.11139	5.09523	3.48322e-07	1.55345e-05	Saa4		CXCL1
ENSMUSG00000077505	0.565342	5.63021	5.20532	1.08163	0.279419		Gm24233		CXCL2
ENSMUSG00000041248	0.773517	5.61862	5.2844	1.06325	0.28767		Kcnj1		CXCL8
ENSMUSG00000087475	1.82041	5.58693	2.5394	2.2001	0.0277995		4933406I18Rik		CXCL10
ENSMUSG00000111454	0.587455	5.39837	5.30866	1.0169	0.309202		Olfr998		CXCL11
ENSMUSG00000098904	0.789083	5.33676	4.02613	1.32553	0.184995		Mir6998		CXCL3
ENSMUSG00000112544	0.871821	5.28979	4.04917	1.30639	0.191421		AC153821.1		CXCL3
ENSMUSG00000102293	0.657316	5.22725	5.31154	0.98413	0.325051		Gm37541		CXCL5
ENSMUSG00000025808	8.92171	5.20795	3.54999	1.46703	0.142367	0.30961	Ccdc7a		CXCL6
ENSMUSG00000027824	0.70169	5.08197	5.05521	1.00529	0.314756		Vmn2r1		CXCL8
ENSMUSG00000109781	1.03414	5.04452	4.13912	1.21874	0.222943		Gm45509		CXCL9
ENSMUSG00000064213	1.52168	5.01946	2.80037	1.79243	0.0730638		Defa24		CYP19A1
ENSMUSG00000111434	1.41435	4.87649	2.50119	1.94966	0.0512163		AC120394.2		CYP2C11
ENSMUSG00000111833	1.37108	4.85373	3.18262	1.52507	0.127241		AC156795.1		CYP2E1
ENSMUSG00000109913	1.52869	4.84391	2.85069	1.69921	0.0892796		Gm30694		CYP7B1
ENSMUSG00000080918	0.978	4.82575	3.58204	1.34721	0.177914		Gm12202		DCTN4
ENSMUSG00000046774	15.2373	4.74548	2.80932	1.68919	0.0911823	0.227297	8030474K03Rik		DEFB2
ENSMUSG00000102221	0.638151	4.74187	5.28327	0.897526	0.369438		Gm37301		DIO1
ENSMUSG00000095943	0.58755	4.71506	4.32581	1.08998	0.275721		Gm25197		DMP1
ENSMUSG00000038408	2.25636	4.65812	4.14936	1.12261	0.261602		1700018A04Rik		DNASE1L2
ENSMUSG00000065444	6.69486	4.63086	1.53455	3.01772	0.00254681		Mir27a		DPYD
ENSMUSG00000003545	3863.59	4.59335	0.961132	4.7791	1.7608e-06	5.53626e-05	Fosb		DUSP1
ENSMUSG00000096423	1.4702	4.52837	2.03815	2.2218	0.0262966		Gm24978		E2F3
ENSMUSG00000094478	0.941018	4.52427	4.76072	0.950332	0.341944		Igkv3-3		EGFR
ENSMUSG00000113771	1.14096	4.5042	4.75195	0.947865	0.343198		Gm36529		EGR1
ENSMUSG00000094164	47.9383	4.48976	1.37094	3.27495	0.00105679	0.00792972	Ighv2-3		ELF3
ENSMUSG00000006200	0.698755	4.47528	5.28368	0.847	0.396995		Rhox6		END1
ENSMUSG00000082532	4.16971	4.44584	1.79123	2.482	0.0130646		Rpl31-ps6		ENG
ENSMUSG00000110110	1.21509	4.44134	4.17816	1.06299	0.287787		Gm30978		ENO2
ENSMUSG00000071490	0.881859	4.42947	5.32983	0.831071	0.405933		Vmn1r212		EPI3
ENSMUSG00000096895	0.829401	4.4266	4.22649	1.04735	0.294939		Gm25245		EPO
ENSMUSG00000085154	7.26248	4.42127	5.28326	0.836845	0.402679		C130046K22Rik		ERBB2
ENSMUSG00000045551	412.298	4.41196	0.927748	4.75556	1.97897e-06	6.02337e-05	Fpr1		F11R
ENSMUSG00000096719	256.608	4.40094	1.28835	3.41594	0.000635628	0.00537448	Mrgpra2b		F3
ENSMUSG00000101571	1.13507	4.39678	4.47563	0.982383	0.325911		Gm6187		F8
ENSMUSG00000081002	0.905425	4.37392	4.33071	1.00998	0.312506		Gm14240		FABP6
ENSMUSG00000030142	1565.64	4.34204	1.01328	4.28512	1.82637e-05	0.000354238	Clec4e		FAM148A
ENSMUSG00000043613	841.249	4.33642	1.18004	3.67482	0.000238016	0.00251698	Mmp3		FAS
ENSMUSG00000090607	3.12042	4.29842	1.76667	2.43307	0.0149714		Gm17052		FASLG
ENSMUSG00000076653	3.82675	4.28132	1.72327	2.48441	0.0129765		Ighv7-2		FCER2
ENSMUSG00000113474	1.1592	4.26222	2.72579	1.56367	0.117896		AC126554.2		FDGRT
ENSMUSG00000105818	2.29643	4.25692	2.83387	1.50216	0.133056		Gm43256		FGF8
ENSMUSG00000089949	0.961934	4.23477	3.05728	1.38514	0.166008		Gm16137		FN1
ENSMUSG00000046916	14.7814	4.22279	1.5081	2.80007	0.0051092	0.0265166	Myct1		FOS
ENSMUSG00000105745	0.92745	4.22251	2.99824	1.40833	0.159034		Gm42521		FSTL3
ENSMUSG00000085641	0.748553	4.21097	5.30812	0.793308	0.427599		4930465M20Rik		FTH1
ENSMUSG00000114711	0.476987	4.20479	5.28441	0.795697	0.426208		AC117656.2		FTH1
ENSMUSG00000050157	8.44636	4.20076	1.87521	2.24016	0.0250808	0.0889573	Gm867		G6PC
ENSMUSG00000094509	12.2536	4.18978	1.57227	2.6648	0.00770334	0.0365812	Ighv14-1		G6PQ
ENSMUSG00000092591	2.82885	4.1886	1.94612	2.15228	0.0313754		Gm20429		GAD1
ENSMUSG00000103230	1.2681	4.16783	2.32181	1.79507	0.072642		Gm17970		GADD45B
ENSMUSG00000105842	0.683201	4.14355	5.30563	0.780972	0.434819		Gm43329		GATA3
ENSMUSG00000105992	1.13976	4.14311	2.84121	1.45822	0.14478		Gm43651		GBP1
ENSMUSG00000047894	1.14448	4.13371	4.52645	0.913235	0.361119		Ang2		GCLC
ENSMUSG00000032271	29.0338	4.13341	1.5121	2.73356	0.00626534	0.0312493	Nnmt		GCLC
ENSMUSG00000080530	2.74871	4.11786	1.5643	2.63239	0.00847856		Gm25540		GCLM
ENSMUSG00000099930	5.02226	4.10042	2.21658	1.84989	0.0643295		Gm2396		GCLM
ENSMUSG00000106567	7.25761	4.06819	1.59649	2.5482	0.0108279		2010309G21Rik		GCNT1
ENSMUSG00000090570	2.38209	4.05318	2.26496	1.78951	0.0735321		Gm17041		GJB1
ENSMUSG00000083700	1.52963	4.05317	2.34705	1.72693	0.0841811		Gm2986		GNAI2
ENSMUSG00000076534	9.95037	4.04555	1.74533	2.31793	0.020453	0.07652	Igkv12-89		GNB2L1
ENSMUSG00000109290	1.25019	4.03954	3.91726	1.03121	0.30244		Phgdh-ps1		GNRH2
ENSMUSG00000029656	1.40677	4.02317	2.94481	1.36619	0.17188		C8b		GRIN2A
ENSMUSG00000076547	91.4961	3.9928	1.03249	3.86715	0.000110113	0.00140003	Igkv4-70		GRM2
ENSMUSG00000076535	48.072	3.98463	1.6653	2.39273	0.0167234	0.0656235	Igkv1-88		GSTP1
ENSMUSG00000108786	0.704729	3.96664	2.98388	1.32936	0.18373		Gm8309		GUCY1A2
ENSMUSG00000076460	0.9724	3.96392	2.82502	1.40315	0.160572		Mir744		GZMB
ENSMUSG00000095056	5.08598	3.95377	1.37767	2.86988	0.00410623		Gm3159		HBE1
ENSMUSG00000106339	4.5036	3.94538	1.63278	2.41636	0.0156766		Gm43489		HBZ
ENSMUSG00000079342	0.494393	3.92916	5.28996	0.742759	0.457628		Lipo1		HGF
ENSMUSG00000085310	2.41503	3.90673	2.15841	1.81	0.0702952		Gm11491		HIF1A
ENSMUSG00000095829	1.89248	3.8995	2.80763	1.38889	0.164865		Speer1		HLAB
ENSMUSG00000114537	1.7884	3.89463	1.88806	2.06277	0.0391341		CT025639.1		HLAG
ENSMUSG00000084892	1.77353	3.88972	2.59117	1.50114	0.133319		Gm14471		HMGN1
ENSMUSG00000041735	1.66205	3.88796	2.37098	1.63981	0.101044		Gm13178		HMOX1
ENSMUSG00000065549	0.888127	3.88747	2.85515	1.36157	0.173335		Mir200b		HOXA9
ENSMUSG00000082912	1.39482	3.86645	3.15521	1.22542	0.220418		Gm8770		HPSE
ENSMUSG00000076764	1.83864	3.85866	2.27486	1.69622	0.0898444		Trav6-2		HSD11B2
ENSMUSG00000093973	191.681	3.85272	1.40946	2.73347	0.00626701	0.0312493	Mrgpra2a		HSD17B8
ENSMUSG00000093807	1.23344	3.85262	2.78437	1.38366	0.166462		Gm23620		HSP90AA1
ENSMUSG00000115224	1.48524	3.83933	2.01113	1.90904	0.0562564		AC115735.1		ICOS5
ENSMUSG00000106227	2.29958	3.83766	1.7548	2.18694	0.0287466		Gm43464		IER2
ENSMUSG00000109706	2.1445	3.79874	1.85328	2.04974	0.0403901		Fth-ps3		IER3
ENSMUSG00000109311	1.32572	3.79761	2.21649	1.71334	0.0866498		AI314278		IFI44L
ENSMUSG00000106884	0.903905	3.79394	2.7976	1.35614	0.175055		Gm20156		IFNB1
ENSMUSG00000099337	1.5649	3.78224	2.28207	1.65738	0.0974437		Gm29486		IFNG
ENSMUSG00000068606	66.3314	3.77309	0.958147	3.9379	8.21978e-05	0.00109947	Gm4841		IGFBP1
ENSMUSG00000081319	0.515155	3.77011	5.29306	0.712275	0.476294		Gm12936		IGFBP3
ENSMUSG00000037161	8.7144	3.76731	1.50447	2.50408	0.012277	0.0522236	Mgarp		IGFBP2
ENSMUSG00000070563	6.19225	3.76569	1.8721	2.01148	0.0442753		Spaca4		IGHC
ENSMUSG00000107094	6.85196	3.75942	1.6733	2.24672	0.024658		Gm43294		IGHE
ENSMUSG00000111913	3.8014	3.74671	1.47132	2.54649	0.0108813		AC153498.1		IGHG1
ENSMUSG00000100094	68.3464	3.74626	1.51242	2.477	0.0132492	0.0552314	1810008I18Rik		IGHG2
ENSMUSG00000086272	2.01135	3.74115	1.96947	1.89958	0.0574889		BC039966		IGHG4
ENSMUSG00000016982	0.951386	3.73649	3.14009	1.18993	0.234073		Pom121l2		IL10
ENSMUSG00000076541	77.6474	3.72582	1.19559	3.11629	0.00183141	0.0121147	Igkv4-79		IL11
ENSMUSG00000030178	1.86897	3.71321	2.55691	1.45223	0.146438		Klra13-ps		IL12B
ENSMUSG00000094403	145.583	3.69561	1.04314	3.54279	0.000395919	0.0037469	Mir692-2		IL13
ENSMUSG00000087681	0.88911	3.69269	3.96942	0.930286	0.352223		Gm13565		IL15
ENSMUSG00000102498	1.26073	3.68386	3.35279	1.09875	0.271879		Gm19445		IL16
ENSMUSG00000113702	1.57001	3.68014	2.82779	1.30142	0.193115		Gm35558		IL17
ENSMUSG00000107835	2.84549	3.66218	1.64301	2.22894	0.0258179		Gm43999		IL18
ENSMUSG00000076709	3.12025	3.65756	2.08716	1.75241	0.0797036		Ighv1-47		IL1A
ENSMUSG00000098672	1.05332	3.64787	4.86423	0.749939	0.453292		Mir6911		IL1B
ENSMUSG00000085297	2.97937	3.62956	2.42498	1.49674	0.134461		Gm11651		IL1RN
ENSMUSG00000070366	1.23996	3.62823	2.76028	1.31444	0.188697		Plpp4		IL2
ENSMUSG00000082357	1.74091	3.61435	1.85161	1.952	0.050938		Gm13542		IL23A
ENSMUSG00000097424	0.897873	3.61218	4.57425	0.789678	0.429716		1700030M09Rik		IL27
ENSMUSG00000076840	5.03761	3.60781	1.59184	2.26644	0.0234246		Trav14-1		IL2RA
ENSMUSG00000038932	2.41094	3.60081	2.28168	1.57814	0.114534		Tcfl5		IL6
ENSMUSG00000024798	45.6154	3.59684	1.14105	3.15223	0.00162027	0.0110431	Htr7		IL8RA
ENSMUSG00000094249	1.44015	3.59443	2.43167	1.47817	0.139363		Gm20091		IL8RB
ENSMUSG00000104166	2.95948	3.58777	1.63326	2.1967	0.0280422		Gm38247		IL9
ENSMUSG00000040026	18809.8	3.58541	0.748509	4.79007	1.66724e-06	5.27528e-05	Saa3		INHBA
ENSMUSG00000100775	1.44945	3.58129	2.86103	1.25175	0.210662		Gm29107		IRF1
ENSMUSG00000091735	2.95218	3.58025	1.67417	2.13853	0.0324736		Gpr62		IRF2
ENSMUSG00000032649	3.76823	3.57889	1.65633	2.16074	0.0307158		Colgalt2		IRF4
ENSMUSG00000114980	2.50385	3.57167	2.26274	1.57847	0.114457		AC102815.1		IRF7
ENSMUSG00000031125	31.4613	3.56158	1.34685	2.64437	0.00818427	0.0382688	3830403N18Rik		JMJD3
ENSMUSG00000091272	1.16511	3.55977	3.06595	1.16107	0.245614		Gm17641		JUNB
ENSMUSG00000095497	15.1256	3.55911	1.6929	2.10237	0.0355206	0.114764	Igkv1-122		KC
ENSMUSG00000030147	4.7533	3.5487	1.45821	2.4336	0.0149497		Clec4b1		KCNK5
ENSMUSG00000092415	6.72785	3.54737	1.21917	2.90966	0.00361817		Gm20513		KCNN2
ENSMUSG00000080703	1.00405	3.54103	3.39849	1.04194	0.297438		Gm13183		KISS1
ENSMUSG00000087037	1.1233	3.53745	3.29017	1.07516	0.282304		4930432L08Rik		KITLG
ENSMUSG00000039745	1322.87	3.5324	0.39402	8.96502	3.10218e-19	6.8927e-16	Htatip2		KLF10
ENSMUSG00000065611	7.3723	3.52981	2.03946	1.73076	0.0834954		Mir23a		KLK3
ENSMUSG00000035860	0.949802	3.52765	3.33891	1.05653	0.290728		Cdhr3		KLRA1
ENSMUSG00000044667	1.44359	3.50298	2.61215	1.34103	0.179909		Plppr4		KRT15
ENSMUSG00000028589	0.614693	3.50203	5.29618	0.661237	0.50846		1700012P22Rik		KRT3
ENSMUSG00000099614	0.639256	3.49777	4.19914	0.832974	0.40486		Uba1y-ps2		KRT5
ENSMUSG00000084146	2.09505	3.4942	1.90073	1.83835	0.0660109		Gm12104		KRT6B
ENSMUSG00000080895	3.3017	3.48567	1.37686	2.53161	0.011354		Gm11645		LAMB2
ENSMUSG00000100815	1.10768	3.47893	4.46182	0.779711	0.435561		Gm29112		LBP
ENSMUSG00000085097	1.31057	3.47682	3.32415	1.04593	0.295594		Gm13049		LCN2
ENSMUSG00000076514	87.2556	3.47553	1.24906	2.78251	0.00539405	0.0277074	Igkv17-121		LEF1
ENSMUSG00000103147	1.89497	3.46557	1.96629	1.76249	0.0779865		Gm7341		LGALS3
ENSMUSG00000115580	0.989535	3.46482	2.19921	1.57548	0.115145		AC154838.3		LIGP1
ENSMUSG00000076038	143.18	3.46465	0.611969	5.66148	1.50077e-08	1.32792e-06	Gm22774		LPIG
ENSMUSG00000110647	1.38851	3.46167	2.4773	1.39735	0.162307		Gm17745		LTA
ENSMUSG00000030359	6.83082	3.45093	3.80348	0.907308	0.364244		Pzp		LTB
ENSMUSG00000100068	1.07774	3.43844	3.92464	0.876117	0.380967		Gm18558		LYN
ENSMUSG00000095477	1.36113	3.43515	2.55074	1.34673	0.178068		Gm25076		LTF
ENSMUSG00000070524	19.4038	3.43215	1.38223	2.48306	0.0130261	0.0546177	Fcrlb		LYZ
ENSMUSG00000083332	5.30414	3.42541	1.26259	2.713	0.00666767		Gm7599		MADCAM1
ENSMUSG00000038916	3.96395	3.42494	1.2123	2.82516	0.00472574		Soga3		MAP4K1
ENSMUSG00000108801	0.576935	3.42467	2.97415	1.15148	0.249535		Gm39090		MBP
ENSMUSG00000084231	2.41788	3.42042	1.80709	1.89278	0.0583869		Gm11975		MCP1
ENSMUSG00000074704	1.595	3.41758	1.56595	2.18243	0.0290781		Rad21l		MDK
ENSMUSG00000108950	7.6157	3.4126	1.19907	2.84603	0.00442674		9130015G15Rik		MMP1
ENSMUSG00000021086	0.639785	3.41254	5.2942	0.644582	0.519198		Ccdc175		MMP3
ENSMUSG00000096678	2.69663	3.40263	1.9569	1.73878	0.082073		Trav9-4		MMP9
ENSMUSG00000040919	0.945262	3.40151	3.04751	1.11616	0.264354		4930505A04Rik		MT3
ENSMUSG00000115100	0.996883	3.38862	2.88001	1.1766	0.239354		AC131586.2		MTHFR
ENSMUSG00000110595	0.851706	3.38441	3.29616	1.02677	0.304527		Gm7990		MUC2
ENSMUSG00000096785	1.5556	3.38067	4.11905	0.820741	0.411794		n-R5s130		MX1
ENSMUSG00000036216	1.18076	3.36833	4.11569	0.818413	0.413121		Leap2		MYB
ENSMUSG00000098320	1.55219	3.36788	3.12022	1.07937	0.280422		Vis1		MYC
ENSMUSG00000087150	1274.42	3.36648	1.3163	2.55753	0.0105417	0.0464324	BC064078		MYLK
ENSMUSG00000114719	1.19364	3.36052	2.05813	1.6328	0.10251		AC129085.5		MYOZ1
ENSMUSG00000086763	5.61242	3.35976	1.28815	2.60821	0.00910178		Plxna4os1		NCAM
ENSMUSG00000070900	1.9805	3.35847	1.45722	2.30471	0.0211826		Gm10306		NFKB1
ENSMUSG00000110517	0.65238	3.35166	5.29383	0.633125	0.526652		Gm31224		NFKB1
ENSMUSG00000094041	0.618238	3.34389	5.17522	0.646136	0.518192		Gm28019		NFKB2
ENSMUSG00000082178	1.2813	3.34161	2.18001	1.53284	0.125315		Gm11307		NFKBIA
ENSMUSG00000031512	1.52966	3.33332	3.0612	1.08889	0.276201		Tex29		NFKBIE
ENSMUSG00000070868	2.7909	3.33293	2.74616	1.21367	0.224875		Skint3		NFKIZ
ENSMUSG00000092286	1.27208	3.32959	1.72373	1.93161	0.0534071		Dtnbos		NGFB
ENSMUSG00000099947	2.35476	3.32225	1.75153	1.89677	0.0578577		Gm28660		NK4
ENSMUSG00000084788	2.56892	3.31904	2.02186	1.64158	0.100677		Gm11342		NLRP2
ENSMUSG00000087129	0.968915	3.31337	3.36828	0.983699	0.325263		Gm16316		NOD2
ENSMUSG00000095680	1.29794	3.31241	2.35329	1.40757	0.15926		Gm12627		NOS1
ENSMUSG00000030144	626	3.30789	0.655319	5.04776	4.47023e-07	1.85844e-05	Clec4d		NOS2A
ENSMUSG00000086563	10.7771	3.30615	1.76183	1.87654	0.0605809	0.169883	Platr15		NOS2A
ENSMUSG00000111165	0.53775	3.30499	5.30051	0.623524	0.53294		4930553I21Rik		NOX1
ENSMUSG00000045967	0.927261	3.30493	3.32114	0.995119	0.319678		Gpr158		NPY1R
ENSMUSG00000006462	2.88592	3.30466	1.61422	2.04721	0.0406372		A530013C23Rik		NQO1
ENSMUSG00000106073	3.58769	3.30429	1.60995	2.05241	0.0401294		Gm42892		NR4A2
ENSMUSG00000102975	15.3853	3.29087	1.43685	2.29033	0.0220023	0.0808043	Gm37347		NRG1
ENSMUSG00000059150	2.64898	3.28841	1.39237	2.36174	0.0181895		Rpl26-ps4		NUAK2
ENSMUSG00000088549	4.83217	3.28731	2.08206	1.57887	0.114365		Gm24959		OLR1
ENSMUSG00000026919	7.87902	3.28523	1.34707	2.43879	0.0147365	0.0595446	Lcn4		OPN1SW
ENSMUSG00000043687	2.28122	3.28443	1.5056	2.18147	0.0291483		1190005I06Rik		OPRD1
ENSMUSG00000084920	0.519529	3.27901	5.19038	0.631747	0.527552		Gm15230		OPRM1
ENSMUSG00000045381	3.38023	3.27802	1.71268	1.91397	0.055624		Olfr433		ORM1
ENSMUSG00000047216	7.37984	3.27468	4.24705	0.771047	0.440679		Cdh19		OXTR
ENSMUSG00000012187	2.7155	3.27357	1.52782	2.14264	0.0321421		Mogat1		PAFAH2
ENSMUSG00000110361	2.15185	3.27344	1.54581	2.11762	0.0342071		Gm8291		PAX8
ENSMUSG00000045350	0.505247	3.26863	5.29224	0.617628	0.536821		Fam186a		PDE7A
ENSMUSG00000109684	2.62835	3.26376	2.49608	1.30755	0.191026		Gm45745		PDGFB
ENSMUSG00000062329	14.8715	3.25471	1.72174	1.89036	0.0587103	0.166279	Cytl1		PDYN
ENSMUSG00000083159	1.13653	3.25173	3.76796	0.862995	0.38814		Gm12180		PENK
ENSMUSG00000028001	12.3263	3.24899	4.6048	0.705565	0.480459	0.674085	Fga		PGK1
ENSMUSG00000076578	52.5914	3.24778	1.07336	3.02581	0.00247972	0.0153188	Igkv6-29		PGLYRP1
ENSMUSG00000106681	0.953364	3.24153	3.01622	1.0747	0.28251		Gm43004		PGR
ENSMUSG00000085649	0.454392	3.23457	5.29871	0.610445	0.541567		A730032A03Rik		PI3
ENSMUSG00000096184	1.15286	3.23417	2.47125	1.30872	0.19063		Gm23304		PI3AP1
ENSMUSG00000054958	250.34	3.22723	0.966824	3.33797	0.000843921	0.00665978	Nt5c1a		PIGF
ENSMUSG00000094703	1.49198	3.2233	1.62265	1.98643	0.0469851		Gm24486		PIK3CA
ENSMUSG00000108293	0.706889	3.22037	3.40816	0.9449	0.34471		Pla2g4c-ps		PIM1
ENSMUSG00000081619	0.954967	3.21788	2.51368	1.28015	0.200494		Gm13351		PLA2
ENSMUSG00000108778	0.716417	3.2176	5.29517	0.607648	0.543421		Gm20083		PLAU
ENSMUSG00000010311	4.80758	3.21506	2.21087	1.45421	0.145888		Optc		PLGR
ENSMUSG00000040569	6.20521	3.21391	1.41447	2.27217	0.0230763		Slc26a7		PLK3
ENSMUSG00000097147	2.38753	3.21077	1.78512	1.79863	0.072078		Gm26780		PNPN13
ENSMUSG00000111596	2.17906	3.20715	1.75651	1.82587	0.0678705		Gm8058		POMC
ENSMUSG00000081745	0.617989	3.20369	5.22541	0.613098	0.539811		Gm15549		PPARGC1B
ENSMUSG00000114539	1.22024	3.20136	2.89577	1.10553	0.26893		AC157650.2		PPP5C
ENSMUSG00000047678	5.70247	3.19952	1.22019	2.62215	0.00873776		Gpr82		PRF1
ENSMUSG00000104927	4.72711	3.19181	1.69978	1.87778	0.0604116		Gm43388		PRKACA
ENSMUSG00000030117	4.6789	3.18558	1.23892	2.57126	0.010133		Gdf3		PRKCD
ENSMUSG00000093816	4.4182	3.18388	1.8812	1.69247	0.0905563		Gm26445		PRKD1
ENSMUSG00000090027	0.784427	3.17068	4.09924	0.77348	0.439238		Gm15740		PRL
ENSMUSG00000085857	0.91523	3.17022	5.29538	0.598677	0.549388		Gm15392		PSMB9
ENSMUSG00000076531	4.01465	3.16601	2.22121	1.42535	0.154055		Igkv4-92		PSME1
ENSMUSG00000082390	1.27508	3.16448	2.44558	1.29396	0.195679		Gm12136		PSME2
ENSMUSG00000114380	1.92947	3.15785	1.72112	1.83477	0.06654		AC154454.1		PTAFR
ENSMUSG00000067702	1.24898	3.15381	1.92745	1.63626	0.101786		Tuba3a		PTEN
ENSMUSG00000089657	8.25869	3.14962	1.2201	2.58145	0.00983868	0.0441823	Gm16585		PTGDS
ENSMUSG00000103105	1.10286	3.1495	3.41591	0.922009	0.356524		Gm18752		PTGES
ENSMUSG00000053961	2.63137	3.14539	1.91595	1.64168	0.100655		Ang5		PTGIS
ENSMUSG00000110315	3.64883	3.13813	1.52994	2.05115	0.0402527		Gm8423		PTGS2
ENSMUSG00000076594	53.9223	3.13385	1.57704	1.98718	0.0469026	0.14106	Igkv6-13		PTHLH
ENSMUSG00000112195	1.1393	3.12416	2.82059	1.10763	0.268023		Gm35405		PTPN1
ENSMUSG00000072423	0.536078	3.12207	5.33346	0.585374	0.558296		Psmb11		PTS
ENSMUSG00000076917	0.487463	3.1125	5.30261	0.586976	0.55722		Traj12		PYCARD
ENSMUSG00000050578	803.26	3.10456	0.998776	3.10836	0.00188126	0.0123871	Mmp13		RAG1
ENSMUSG00000104114	0.950868	3.10403	3.2052	0.968435	0.332827		Gm37297		RAG2
ENSMUSG00000069867	1.1539	3.10326	1.99091	1.55872	0.119064		Pabpn1l		RBBP4
ENSMUSG00000095127	11.7484	3.10291	1.43984	2.15504	0.0311586	0.104544	Ighv1-82		RDH1
ENSMUSG00000084361	1.40281	3.0916	2.34242	1.31983	0.186891		Gm8202		RDH7
ENSMUSG00000110515	2.87528	3.08922	1.54374	2.00114	0.0453778		Gm9644		REL
ENSMUSG00000084875	0.662389	3.08411	2.99557	1.02955	0.303219		4930570D08Rik		RELB
ENSMUSG00000029915	187.832	3.08381	0.645968	4.77393	1.80662e-06	5.62727e-05	Clec5a		REV3L
ENSMUSG00000113135	1.32785	3.08108	5.23336	0.588739	0.556036		AC116589.2		RIPK2
ENSMUSG00000090675	2.16318	3.07852	2.05097	1.50101	0.133353		Olfr111		S100A10
ENSMUSG00000100120	2.08422	3.07697	1.39597	2.20417	0.0275122		Gm553		S100A4
ENSMUSG00000029553	40.8341	3.07614	1.0952	2.80875	0.0049735	0.0260013	Tfec		S100A6
ENSMUSG00000066513	36.1566	3.07536	0.728979	4.21872	2.45698e-05	0.000440648	Klk1b4		SAA1
ENSMUSG00000111632	1.48826	3.07477	3.63228	0.846512	0.397267		AC148328.2		SAA1
ENSMUSG00000087113	20.5949	3.07066	1.19133	2.5775	0.00995174	0.044549	Gm11714		SAA3
ENSMUSG00000076471	10.4357	3.06967	1.56535	1.96102	0.0498771	0.147608	Trbv14		SAT1
ENSMUSG00000096020	2.60575	3.06877	2.64794	1.15893	0.246487		Ighv1-75		SCD4
ENSMUSG00000083242	1.54356	3.05577	2.09398	1.45931	0.14448		Gm15659		SCL11A2
ENSMUSG00000096887	1.56874	3.04492	1.84233	1.65276	0.0983802		Gm20594		SELE
ENSMUSG00000083772	3.69012	3.03992	1.16097	2.61843	0.00883364		Gm15566		SELP
ENSMUSG00000100685	0.518775	3.03975	5.29641	0.573926	0.566018		Gm28610		SELS
ENSMUSG00000072573	3.24153	3.03785	1.42122	2.1375	0.0325576		Gm10369		SENP2
ENSMUSG00000026180	1238.74	3.03668	0.849775	3.57351	0.000352224	0.00341086	Cxcr2		SERPINA1
ENSMUSG00000108915	0.881361	3.03317	3.44094	0.881494	0.37805		Gm44966		SERPINA2
ENSMUSG00000108239	2.60623	3.03042	2.31522	1.30891	0.190565		Gm19434		SERPINA3
ENSMUSG00000090307	2.2877	3.02936	3.06863	0.987201	0.323544		1700071M16Rik		SERPINB1
ENSMUSG00000114166	0.951829	3.0178	3.13514	0.962575	0.335761		Gm18246		SERPINE1
ENSMUSG00000109881	3.70585	3.01575	1.79965	1.67574	0.0937888		Gm45507		SERPINE2
ENSMUSG00000102935	0.95248	3.01403	2.56312	1.17592	0.239626		Gm38355		SH3BGRL
ENSMUSG00000039661	2.73633	3.01338	1.84386	1.63428	0.1022		Dusp26		SKP2
ENSMUSG00000050671	0.798688	3.00913	3.57883	0.840814	0.400452		Ism2		SLC16A1
ENSMUSG00000076538	98.842	3.00743	0.697011	4.31476	1.59778e-05	0.00031887	Igkv13-84		SLC3A2
ENSMUSG00000113495	0.98481	3.00572	2.37848	1.26372	0.206332		Gm19792		SLC6A6
ENSMUSG00000101880	1.01877	3.00415	2.66845	1.1258	0.260249		Gm29282		SLFN2
ENSMUSG00000100629	2.73073	2.99907	2.25524	1.32982	0.183576		Gm28192		SNAI1
ENSMUSG00000047562	1041.01	2.99787	1.02422	2.92699	0.0034226	0.0195772	Mmp10		SOD1
ENSMUSG00000115071	0.867006	2.99529	3.10061	0.966033	0.334028		AC154843.1		SOD2
ENSMUSG00000094075	17.0167	2.98972	1.18773	2.51718	0.0118297	0.0508074	Ighv1-80		SOX9
ENSMUSG00000038805	6.10976	2.98941	1.22597	2.43841	0.0147522		Six3		SPATA19
ENSMUSG00000112264	3.17381	2.98898	1.22443	2.44111	0.0146421		AC153365.1		SPI1
ENSMUSG00000115263	0.591141	2.98709	5.30239	0.563348	0.573198		AC154683.1		SPP1
ENSMUSG00000081768	1.76833	2.987	1.70653	1.75033	0.0800607		Gm12755		ST6GAL1
ENSMUSG00000110882	2.44164	2.98063	1.46312	2.03717	0.041633		Gm7642		ST8SIA1
ENSMUSG00000085183	1.01165	2.97533	3.94308	0.754569	0.450508		Gm12603		SUPV3L1
ENSMUSG00000059657	384.566	2.97317	0.840379	3.53789	0.000403333	0.00380625	Stfa2l1		SZAT5A
ENSMUSG00000076550	127.14	2.97101	1.21276	2.44979	0.014294	0.0582867	Igkv4-63		TACR1
ENSMUSG00000072849	2.46509	2.96919	2.9559	1.0045	0.31514		Serpina1e		TAP1
ENSMUSG00000082622	0.620446	2.96832	3.59078	0.826652	0.408435		Gm12632		TAPBP
ENSMUSG00000076533	25.7559	2.96357	1.5325	1.93382	0.0531358	0.154486	Igkv4-90		TCRB
ENSMUSG00000094787	102.368	2.96278	1.33647	2.21688	0.0266316	0.0930223	Ighv1-54		TERT
ENSMUSG00000110141	2.27293	2.96084	2.10526	1.4064	0.159604		Gm45684		TFEC
ENSMUSG00000097651	2.30541	2.95261	2.80625	1.05215	0.292729		4930461G14Rik		TFF3
ENSMUSG00000079639	1.73572	2.95256	3.82258	0.7724	0.439877		Rhox4a		TFPI2
ENSMUSG00000086124	0.732292	2.95123	4.82898	0.611151	0.541099		A530076I17Rik		TGM1
ENSMUSG00000108092	0.542379	2.94982	5.29743	0.55684	0.577637		Gm44189		THBS1
ENSMUSG00000074625	14.8155	2.94585	1.14282	2.5777	0.00994608	0.0445347	Arhgap40		THBS2
ENSMUSG00000005800	2041.93	2.94029	1.36051	2.16117	0.0306826	0.103328	Mmp8		TICAM1
ENSMUSG00000102654	8.54815	2.93448	1.56221	1.87842	0.0603241	0.169377	Ighv1-21		TIFA
ENSMUSG00000079371	1.87989	2.93447	2.25105	1.3036	0.19237		Gm3476		TLR9
ENSMUSG00000038591	3.16184	2.93428	5.31544	0.552029	0.580929		Colec10		TNC
ENSMUSG00000112846	1.02135	2.93255	3.90635	0.750714	0.452825		4930432O09Rik		TNF
ENSMUSG00000107392	0.880719	2.93248	2.8106	1.04337	0.296779		Gm7792		TNFAIP2
ENSMUSG00000091292	0.506179	2.93148	5.30331	0.552764	0.580425		Gm3104		TNFAIP3
ENSMUSG00000108935	0.851986	2.9312	3.8409	0.763155	0.445371		4930588G17Rik		TNFRSF4
ENSMUSG00000096410	6.22782	2.93046	1.856	1.57891	0.114357		Ighv1-19		TNFRSF9
ENSMUSG00000086822	0.970379	2.92338	2.90176	1.00745	0.313717		5330413P13Rik		TNFSF10
ENSMUSG00000076596	64.3654	2.91849	0.946177	3.08451	0.00203887	0.0131989	Igkv3-10		TNFSF13B
ENSMUSG00000088913	1.50162	2.91351	2.44719	1.19055	0.23383		Gm22611		TNFSF13B
ENSMUSG00000005883	3.76809	2.90363	1.64828	1.76161	0.0781357		Spo11		TNFSF15
ENSMUSG00000092920	47.5295	2.90136	1.04092	2.78731	0.00531472	0.0273843	Mirt2		TNFSFRF1B
ENSMUSG00000113579	2.34153	2.89996	1.64625	1.76156	0.0781436		AC122327.2		TNIP1
ENSMUSG00000021750	8.83247	2.89771	1.76643	1.64043	0.100916	0.244043	Fam107a		TNIP3
ENSMUSG00000024064	1.53231	2.89654	2.2091	1.31119	0.189794		Galnt14		TRAF1
ENSMUSG00000109331	1.79038	2.88994	1.6225	1.78117	0.0748855		Gm42402		TRAF2
ENSMUSG00000108897	2.32027	2.88742	1.97313	1.46337	0.143366		Gm44861		TREM1
ENSMUSG00000106459	3.96005	2.88463	1.23074	2.34381	0.0190879		Gm43245		TRP53
ENSMUSG00000038491	1.08175	2.88154	2.42697	1.1873	0.23511		Cdk19os		TRPC1
ENSMUSG00000110443	5.19505	2.88145	0.963479	2.99068	0.0027836		Gm39197		TWIST1
ENSMUSG00000024406	1.03412	2.87807	3.20167	0.898928	0.368691		Pou5f1		UCP2
ENSMUSG00000109228	2.02334	2.87697	1.47549	1.94984	0.0511949		Fam81b		UGCGL1
ENSMUSG00000108196	0.763752	2.87552	3.0263	0.950175	0.342023		Gm36328		UPK1B
ENSMUSG00000026609	1.6816	2.87394	1.57255	1.82756	0.067615		Ush2a		UPP1
ENSMUSG00000096168	4.81052	2.87383	1.82125	1.57794	0.114578		Trav5n-4		VCAM1
ENSMUSG00000057899	1.05419	2.87139	3.06609	0.9365	0.349016		Adgrf2		VEGFC
ENSMUSG00000087505	0.678732	2.87016	3.085	0.930359	0.352185		Gm15241		VIM
ENSMUSG00000076581	1.05618	2.86982	3.34184	0.858755	0.390476		Igkv8-26		VPS53
ENSMUSG00000096580	1.30989	2.86798	5.30746	0.540367	0.588944		Igkv1-132		WERVWE1
ENSMUSG00000076576	172.297	2.86057	1.27621	2.24146	0.0249962	0.0887357	Igkv6-32		WNT10B
ENSMUSG00000095752	1.4413	2.86019	1.90792	1.49911	0.133845		Gm24182		WT1
ENSMUSG00000096461	17.3186	2.85851	1.63943	1.74359	0.08123	0.209459	Igkv14-130		XDH
ENSMUSG00000092251	1.17734	2.85699	3.14153	0.909427	0.363125		Trav9n-1		XIAP
ENSMUSG00000049902	1.13093	2.85216	3.34839	0.851802	0.394324		4921517D22Rik		YY1
ENSMUSG00000107634	0.420825	2.84569	5.29578	0.537352	0.591025		Gm36816		ZNF366
ENSMUSG00000052281	1.6131	2.84296	2.19762	1.29365	0.195785		Tspan32os
ENSMUSG00000111163	2.17035	2.8427	1.42572	1.99387	0.0461663		Gm46136
ENSMUSG00000028031	3.49327	2.8376	2.4282	1.1686	0.242563		Dkk2
ENSMUSG00000112149	1.0483	2.83316	2.04372	1.38628	0.165663		AC153948.1
ENSMUSG00000102423	1.97362	2.82937	2.15931	1.31032	0.190089		Gm37465
ENSMUSG00000089877	0.705829	2.82711	5.32028	0.531384	0.595153		Gm16102
ENSMUSG00000111361	1.55503	2.82706	3.06246	0.923133	0.355938		AC153959.1
ENSMUSG00000096175	2.47506	2.82631	1.84455	1.53225	0.12546		Gm21761
ENSMUSG00000064115	1.96863	2.82477	1.91678	1.47371	0.140561		Cadm2
ENSMUSG00000110491	0.396381	2.82381	5.32277	0.530515	0.595755		Gm31138
ENSMUSG00000105846	1.39977	2.82363	2.92725	0.964601	0.334745		Gm43258
ENSMUSG00000032595	2.70387	2.82178	2.097	1.34563	0.178423		Cdhr4
ENSMUSG00000114982	8.29875	2.82172	4.22848	0.667313	0.504572	0.693609	Vmn1r14
ENSMUSG00000106032	1.92224	2.81863	1.77005	1.5924	0.111295		Gm42463
ENSMUSG00000105109	1.86688	2.81597	1.86351	1.51111	0.13076		Gm44297
ENSMUSG00000080955	1.45403	2.81368	1.92149	1.46432	0.143106		Gm14263
ENSMUSG00000109383	0.866949	2.81	4.08881	0.687242	0.49193		Gm36584
ENSMUSG00000076526	89.2765	2.80805	1.2906	2.17577	0.0295721	0.100502	Igkv12-98
ENSMUSG00000094372	1.18079	2.80771	5.26869	0.532905	0.5941		Gm21839
ENSMUSG00000091017	4.64846	2.8034	5.31823	0.52713	0.598104		Fam71a
ENSMUSG00000101268	0.935136	2.80061	2.5928	1.08015	0.280076		2010310C07Rik
ENSMUSG00000086442	2.25925	2.79905	1.71157	1.63537	0.101971		Gm11722
ENSMUSG00000055159	1.79056	2.799	1.83597	1.52454	0.127374		4930583K01Rik
ENSMUSG00000111758	3.80767	2.79726	1.49951	1.86545	0.0621181		Gm30373
ENSMUSG00000090188	7.16814	2.79692	1.03451	2.70362	0.00685888		Gm7418
ENSMUSG00000021078	1.16871	2.79646	4.49498	0.62213	0.533856		Tomm20l
ENSMUSG00000091163	2.16529	2.79359	2.60293	1.07325	0.283159		Gm3962
ENSMUSG00000104291	23.824	2.79316	1.01465	2.75282	0.00590846	0.0298061	A130071D04Rik
ENSMUSG00000112354	1.16058	2.79198	2.79098	1.00036	0.317139		Gm33843
ENSMUSG00000081568	1.92206	2.79178	1.6266	1.71633	0.0861025		Gm15032
ENSMUSG00000091577	1.9203	2.78868	1.75991	1.58455	0.113068		Gm6211
ENSMUSG00000088439	3.26324	2.78675	1.34923	2.06544	0.038881		Gm25386
ENSMUSG00000079012	131.887	2.78127	1.62194	1.71478	0.0863855	0.219164	Serpina3m
ENSMUSG00000091400	1.21232	2.77956	2.18026	1.27488	0.202353		Gm6356
ENSMUSG00000103200	1.63958	2.77903	1.45918	1.90452	0.0568421		Gm37328
ENSMUSG00000082345	7.38689	2.77872	0.98277	2.82743	0.00469226		Gm13622
ENSMUSG00000097913	1.86628	2.77844	2.76264	1.00572	0.314551		Gm26837
ENSMUSG00000083262	2.73213	2.7781	2.1788	1.27506	0.202287		Gm14470
ENSMUSG00000079988	3.10657	2.7763	1.65318	1.67937	0.09308		Gm11970
ENSMUSG00000065227	7.05268	2.77502	1.05813	2.62256	0.00872711		Gm25790
ENSMUSG00000114313	0.790027	2.77202	4.19459	0.660856	0.508705		CT009527.1
ENSMUSG00000026354	2.07569	2.76695	2.24061	1.23491	0.216865		Lct
ENSMUSG00000097912	1.02375	2.76653	3.42004	0.808916	0.418563		6330403N20Rik
ENSMUSG00000097702	2.00271	2.76323	1.82206	1.51654	0.129383		Gm26739
ENSMUSG00000079597	390.102	2.76202	1.03324	2.67317	0.00751373	0.0358682	Gm5483
ENSMUSG00000047220	8.57779	2.75994	1.17056	2.35779	0.0183843	0.0706031	Ccdc36
ENSMUSG00000086392	1.84194	2.75973	1.57064	1.75708	0.0789039		Mccc1os
ENSMUSG00000102331	16.2674	2.7577	0.771828	3.57294	0.000352993	0.00341665	Gm19938
ENSMUSG00000113257	1.05412	2.756	2.55203	1.07992	0.280176		Gm30409
ENSMUSG00000041817	9.18625	2.74953	1.08429	2.53579	0.0112194	0.0487195	Fam169a
ENSMUSG00000099663	4.22194	2.74943	1.369	2.00836	0.0446054		Gm29201
ENSMUSG00000095132	7.96401	2.74841	0.996892	2.75697	0.00583391	0.0295027	Rnu6
ENSMUSG00000104962	1.27746	2.74769	2.7612	0.995109	0.319683		Trgj1
ENSMUSG00000022181	13.3995	2.74691	1.2831	2.14085	0.0322863	0.107265	C6
ENSMUSG00000096633	3.69524	2.74559	1.32872	2.06633	0.0387971		Gm22170
ENSMUSG00000098871	3.17909	2.73838	1.77072	1.54648	0.121988		Mir6381
ENSMUSG00000076821	4.61264	2.73688	1.62266	1.68666	0.0916689		Trav8n-2
ENSMUSG00000107491	2.74965	2.73553	1.42887	1.91448	0.055559		Gm17893
ENSMUSG00000060161	0.814998	2.73511	4.03275	0.678223	0.49763		Klk1b7-ps
ENSMUSG00000088542	3.22095	2.73377	1.68668	1.62079	0.105062		Gm24962
ENSMUSG00000085833	0.463468	2.73368	5.30422	0.515378	0.606289		Gm13003
ENSMUSG00000106751	8.01186	2.73043	1.12128	2.43511	0.0148872	0.0599837	Gm42467
ENSMUSG00000084648	1.54786	2.72439	3.72599	0.731185	0.464666		Gm24378
ENSMUSG00000108266	2.20976	2.7243	1.48013	1.84058	0.065683		Gm5305
ENSMUSG00000078173	0.608078	2.72422	3.65607	0.745122	0.456198		Lenep
ENSMUSG00000097639	15.56	2.72133	0.702617	3.87313	0.000107445	0.00137202	Platr4
ENSMUSG00000074885	1.5828	2.7185	2.39467	1.13523	0.25628		Gm10782
ENSMUSG00000097633	1.17399	2.71837	2.25721	1.2043	0.228472		Gm16617
ENSMUSG00000043126	1.03085	2.7177	4.20691	0.646009	0.518274		D830039M14Rik
ENSMUSG00000082076	0.997791	2.71706	2.37373	1.14464	0.252358		Gm8659
ENSMUSG00000109291	1.7238	2.71424	1.71002	1.58726	0.112455		Gm2814
ENSMUSG00000048215	10.5159	2.71262	1.63631	1.65777	0.0973642	0.237699	A630023P12Rik
ENSMUSG00000071679	0.390361	2.70751	5.2988	0.510967	0.609374		Rtl4
ENSMUSG00000110060	6.5394	2.70385	1.19994	2.25332	0.024239		Gm9860
ENSMUSG00000108205	0.811097	2.70131	4.0313	0.670084	0.502804		Gm19252
ENSMUSG00000101113	1.00109	2.69673	3.78817	0.71188	0.476539		1700025B11Rik
ENSMUSG00000105217	1.70638	2.69555	2.21243	1.21837	0.223084		Gm42873
ENSMUSG00000074444	0.436157	2.69317	5.32016	0.50622	0.612702		Defa30
ENSMUSG00000028487	6.68818	2.69223	1.4296	1.88321	0.0596725		Bnc2
ENSMUSG00000106192	0.917841	2.69168	2.34719	1.14677	0.251478		Gm42818
ENSMUSG00000111924	2.39388	2.69007	1.77668	1.5141	0.130001		4930556N09Rik
ENSMUSG00000048281	1.32238	2.68888	3.73724	0.719481	0.471845		Dleu7
ENSMUSG00000109893	0.890045	2.68593	3.37382	0.796109	0.425969		Gm9655
ENSMUSG00000104388	11.8365	2.6859	1.03367	2.5984	0.00936595	0.0424696	Gm37033
ENSMUSG00000106281	2.27079	2.68155	1.59507	1.68115	0.0927343		Gm44346
ENSMUSG00000087801	1.89985	2.67262	2.01528	1.32617	0.184782		Gm25980
ENSMUSG00000007279	0.688228	2.67204	4.9426	0.540614	0.588774		Scube2
ENSMUSG00000039037	15.9012	2.66986	1.6571	1.61116	0.107144	0.253708	St6galnac5
ENSMUSG00000077497	0.805963	2.66735	3.99597	0.667511	0.504446		Gm23593
ENSMUSG00000098068	1.09967	2.66732	2.39015	1.11596	0.264437		Gm7909
ENSMUSG00000045680	172.096	2.66689	1.11956	2.38208	0.017215	0.0671015	Tcf21
ENSMUSG00000074595	2.23633	2.66475	1.6796	1.58654	0.112618		Wfdc6a
ENSMUSG00000109338	3.15944	2.66474	1.41725	1.88022	0.0600781		Gm45030
ENSMUSG00000108438	0.59286	2.66384	5.30372	0.502259	0.615485		Gm9278
ENSMUSG00000020354	7.24412	2.66272	1.57276	1.69303	0.0904507		Sgcd
ENSMUSG00000103693	26.0691	2.66251	0.846252	3.14624	0.00165386	0.0112224	Gm37529
ENSMUSG00000111535	4.41592	2.66212	1.43025	1.8613	0.0627025		Gm35154
ENSMUSG00000113566	2.1514	2.66078	2.25325	1.18087	0.237656		Gm40977
ENSMUSG00000097266	3.00413	2.65639	5.30361	0.500865	0.616466		Gm26802
ENSMUSG00000113392	1.76733	2.65598	2.29921	1.15517	0.24802		Gm36262
ENSMUSG00000090782	0.659329	2.65511	5.326	0.498519	0.618118		Traj60
ENSMUSG00000058252	4.53275	2.65239	1.43039	1.85431	0.0636951		Tcp11x2
ENSMUSG00000089371	16.8163	2.65101	0.96896	2.73593	0.00622042	0.0310664	Mir1938
ENSMUSG00000106273	2.96758	2.65081	1.32106	2.00658	0.0447945		Gm43767
ENSMUSG00000107076	0.55567	2.64959	4.21696	0.628318	0.529796		Gm43480
ENSMUSG00000109857	2.21616	2.64752	1.36281	1.9427	0.0520528		Gm32817
ENSMUSG00000074782	3.63023	2.64581	1.60648	1.64696	0.099566		4833422C13Rik
ENSMUSG00000076758	1.82787	2.6454	2.91935	0.90616	0.364851		Trav1
ENSMUSG00000068463	0.624713	2.64454	5.311	0.497937	0.618528		B630019A10Rik
ENSMUSG00000089727	1.60229	2.64431	2.57996	1.02494	0.305389		Klra8
ENSMUSG00000097120	6.23757	2.64409	1.00802	2.62305	0.0087147		Gm26887
ENSMUSG00000103094	3.16611	2.63753	1.85154	1.42451	0.154299		Gm37558
ENSMUSG00000103685	2.02665	2.63699	2.1194	1.24422	0.21342		Gm37074
ENSMUSG00000108681	1.55838	2.63618	1.86321	1.41486	0.15711		Gm17825
ENSMUSG00000103811	2.71963	2.63476	1.79164	1.47059	0.141403		Gm38004
ENSMUSG00000110864	0.468503	2.63457	5.31137	0.496024	0.619878		Gm31374
ENSMUSG00000095360	0.659177	2.63044	3.42216	0.768649	0.442102		Gm3594
ENSMUSG00000107576	1.69362	2.62917	2.23281	1.17752	0.238989		Gm44093
ENSMUSG00000105995	1.01728	2.62848	2.80071	0.938507	0.347984		Gm43554
ENSMUSG00000106534	0.472496	2.62656	4.5217	0.580878	0.561323		Gm6366
ENSMUSG00000036353	22.4695	2.62594	0.971949	2.70173	0.00689797	0.0336026	P2ry12
ENSMUSG00000105203	2.20544	2.62445	1.73198	1.51529	0.129699		4933428P19Rik
ENSMUSG00000097175	4.09356	2.62419	1.66919	1.57214	0.115918		Gm27018
ENSMUSG00000084138	3.14449	2.62325	1.26027	2.0815	0.0373877		Gm14915
ENSMUSG00000095859	1.54973	2.62232	4.17379	0.628284	0.529818		Ighv1-43
ENSMUSG00000027547	0.692054	2.62164	5.03191	0.521003	0.602365		Sall4
ENSMUSG00000062515	296.093	2.62125	0.927008	2.82765	0.00468914	0.0248526	Fabp4
ENSMUSG00000014543	60.781	2.61939	0.862075	3.03846	0.00237788	0.0148567	Klra17
ENSMUSG00000033027	16.5041	2.61473	1.12101	2.33248	0.0196755	0.0744046	Klrc3
ENSMUSG00000095210	30.1968	2.61451	1.35402	1.93093	0.0534917	0.155273	Ighv5-9-1
ENSMUSG00000099210	2.27409	2.61391	2.21268	1.18133	0.237471		Mir7051
ENSMUSG00000041449	6.5214	2.6098	1.53678	1.69822	0.0894655		Serpina3h
ENSMUSG00000097742	1.0223	2.60961	3.37411	0.773423	0.439272		Gm26535
ENSMUSG00000097258	0.923602	2.60795	3.73038	0.699111	0.484483		Gm26767
ENSMUSG00000113762	4.04032	2.6075	1.51182	1.72475	0.084573		AC122327.3
ENSMUSG00000113193	0.673415	2.60675	5.27254	0.494402	0.621023		Gm40576
ENSMUSG00000064890	0.850338	2.60611	2.47528	1.05285	0.292408		Gm22505
ENSMUSG00000111192	0.740109	2.60463	5.32286	0.489329	0.624609		AC108846.3
ENSMUSG00000108640	0.420027	2.6037	5.31691	0.489702	0.624345		Gm44508
ENSMUSG00000095737	10.2051	2.60337	1.79742	1.44839	0.147507	0.316797	Igkv11-125
ENSMUSG00000074731	0.633938	2.60286	5.32338	0.48895	0.624877		Zfp345
ENSMUSG00000111243	3.96368	2.60221	1.34033	1.94147	0.0522018		Gm4668
ENSMUSG00000082001	1.00562	2.60185	2.20958	1.17753	0.238984		Gm15607
ENSMUSG00000101389	282.796	2.59883	0.863098	3.01105	0.00260347	0.0159258	Ms4a4a
ENSMUSG00000094652	3.44543	2.59859	1.7944	1.44817	0.147569		Ighv1-42
ENSMUSG00000108238	9.80185	2.59715	1.39778	1.85805	0.0631618	0.174961	Gm43984
ENSMUSG00000095651	0.540401	2.59697	5.31679	0.488447	0.625233		Gm21817
ENSMUSG00000083887	0.599841	2.59451	5.31035	0.488577	0.625141		Gm11930
ENSMUSG00000106173	1.0057	2.59434	3.17251	0.817758	0.413495		Gm42764
ENSMUSG00000106112	1.12049	2.59309	3.9172	0.661974	0.507988		Gm43434
ENSMUSG00000104351	1.55174	2.59009	3.05552	0.847675	0.396619		Gm37125
ENSMUSG00000074256	1.57442	2.58884	2.38096	1.08731	0.2769		Gm10655
ENSMUSG00000096106	4.54667	2.58832	2.04549	1.26538	0.205736		Trav5d-4
ENSMUSG00000025892	4.23585	2.58798	2.63486	0.98221	0.325996		Gria4
ENSMUSG00000088113	1.0234	2.58711	3.95257	0.654538	0.512765		Mir1960
ENSMUSG00000103911	0.49173	2.58625	5.31415	0.486672	0.626491		Gm38074
ENSMUSG00000106858	2.02315	2.58525	2.36412	1.09354	0.274157		Gm43844
ENSMUSG00000095857	0.769916	2.58468	2.77421	0.931683	0.3515		Gm22618
ENSMUSG00000091906	1.03513	2.58372	3.31934	0.778382	0.436344		1700099I09Rik
ENSMUSG00000108502	3.87591	2.58369	1.05063	2.45918	0.0139257		Gm9240
ENSMUSG00000109127	1.19655	2.58077	3.67046	0.70312	0.481981		Gm31135
ENSMUSG00000059742	1.56126	2.58037	2.29717	1.12328	0.261317		Kcnh7
ENSMUSG00000105128	7.1193	2.57853	1.82683	1.41148	0.158103		Gm42870
ENSMUSG00000090709	5.02103	2.5772	1.3678	1.88419	0.0595391		Gm17173
ENSMUSG00000097426	3.12261	2.57539	1.65929	1.55211	0.120636		Gm8941
ENSMUSG00000083546	0.588552	2.5738	5.32314	0.483512	0.628733		Tpt1-ps1
ENSMUSG00000094124	13.813	2.5733	1.5812	1.62744	0.103645	0.24795	Ighv1-74
ENSMUSG00000092373	1.64473	2.57173	1.84301	1.39539	0.162897		Gm20535
ENSMUSG00000101746	1.47007	2.57065	3.48668	0.737278	0.460953		2310043L19Rik
ENSMUSG00000092224	7.90909	2.56966	1.21685	2.11173	0.0347098	0.112915	Gm8815
ENSMUSG00000079380	0.568841	2.56817	3.05341	0.841083	0.400301		Gm8271
ENSMUSG00000106689	1.04987	2.56782	3.85684	0.665784	0.505549		Gm18345
ENSMUSG00000087016	0.766	2.5656	4.01402	0.63916	0.522719		Gm15979
ENSMUSG00000102048	0.961214	2.56534	1.95824	1.31002	0.190188		Gm6075
ENSMUSG00000109624	8.59749	2.56067	1.22	2.09891	0.0358245	0.115527	Saa-ps
ENSMUSG00000100106	0.537762	2.55834	5.30979	0.481816	0.629936		Gm28856
ENSMUSG00000079428	1.9033	2.55444	1.43941	1.77464	0.075957		Tceal7
ENSMUSG00000092916	0.604149	2.5541	5.3032	0.481616	0.630079		Gm24082
ENSMUSG00000081357	2.46745	2.55247	2.06596	1.23548	0.21665		Xlr4e-ps
ENSMUSG00000084012	1.54071	2.55132	1.69766	1.50284	0.13288		Gm11956
ENSMUSG00000027398	8665.33	2.55063	0.633616	4.02551	5.68528e-05	0.000835763	Il1b
ENSMUSG00000079293	383.991	2.55026	0.746495	3.41632	0.000634739	0.00537274	Clec7a
ENSMUSG00000115746	1.40108	2.54831	2.12469	1.19938	0.230381		AC165154.2
ENSMUSG00000065505	0.425994	2.54558	5.31229	0.479188	0.631805		Mir148a
ENSMUSG00000045291	1.07077	2.54374	2.88129	0.88285	0.377317		E330021D16Rik
ENSMUSG00000080350	1.62743	2.53976	1.8837	1.34828	0.177567		Gm26248
ENSMUSG00000114605	5.62053	2.53835	1.401	1.81182	0.0700144		AC154548.1
ENSMUSG00000027386	13.0923	2.53421	1.52407	1.66279	0.0963549	0.235926	Fbln7
ENSMUSG00000024459	1.43333	2.53352	2.07548	1.22069	0.222204		H2-M5
ENSMUSG00000089404	0.991379	2.53147	3.92912	0.644285	0.519391		Gm24877
ENSMUSG00000114877	0.575914	2.53147	5.31525	0.476265	0.633886		AC165092.2
ENSMUSG00000039167	24.8182	2.52855	1.3875	1.82238	0.0683976	0.185256	Adgrl4
ENSMUSG00000031722	3168.57	2.52764	0.901701	2.8032	0.00505989	0.0263689	Hp
ENSMUSG00000076915	0.490779	2.5268	5.30907	0.475941	0.634117		Traj14
ENSMUSG00000075029	2.9615	2.52646	1.40716	1.79543	0.0725845		4930558J22Rik
ENSMUSG00000106478	10.4877	2.52611	1.23503	2.04538	0.0408172	0.127415	Gm36551
ENSMUSG00000106248	1.69481	2.52611	1.80115	1.4025	0.160767		Gm9728
ENSMUSG00000111992	1.36283	2.52549	2.63455	0.958607	0.337757		AC160863.1
ENSMUSG00000044377	7.27026	2.52411	0.931608	2.70941	0.00674034		Gm13080
ENSMUSG00000093467	1.89441	2.52378	2.97834	0.847377	0.396785		Gm20659
ENSMUSG00000094315	6.48713	2.5201	2.21588	1.13729	0.255416		Igkv4-78
ENSMUSG00000098270	1.66006	2.51664	3.29914	0.762816	0.445573		Gm27221
ENSMUSG00000115387	2.03635	2.51596	1.45175	1.73305	0.0830861		AC154563.1
ENSMUSG00000114554	4.10214	2.51001	1.34687	1.86359	0.0623795		CT009711.2
ENSMUSG00000078122	34.7745	2.50976	0.701579	3.57731	0.000347154	0.00337319	F630028O10Rik
ENSMUSG00000097617	6.88049	2.50835	1.41422	1.77366	0.0761192		Gm10687
ENSMUSG00000097641	2.34321	2.50777	2.59088	0.967923	0.333083		Gm26865
ENSMUSG00000102705	4.4419	2.50712	1.31221	1.91062	0.0560539		4632432E15Rik
ENSMUSG00000025141	1.31946	2.50704	2.93049	0.855504	0.392272		Myadml2
ENSMUSG00000020000	4.42272	2.50668	1.61225	1.55477	0.12		Moxd1
ENSMUSG00000089800	5.48143	2.50652	0.952949	2.63028	0.00853148		Rps19-ps10
ENSMUSG00000085682	1.98342	2.49729	2.02386	1.23392	0.217231		Gm14267
ENSMUSG00000057370	1.78289	2.49625	1.68268	1.48349	0.137943		Gm8724
ENSMUSG00000082837	0.566164	2.49597	5.32875	0.468398	0.6395		Gm15373
ENSMUSG00000096183	0.850186	2.49444	2.92429	0.853008	0.393655		Gm3727
ENSMUSG00000095170	21.0872	2.49406	1.37878	1.80889	0.0704685	0.188902	Ighv8-11
ENSMUSG00000065750	7.6507	2.49379	1.08673	2.29476	0.0217469		Gm23346
ENSMUSG00000065232	4.86161	2.49175	1.11516	2.23443	0.0254546		Gm22973
ENSMUSG00000085411	1.37699	2.49127	2.48859	1.00108	0.316789		Gm14319
ENSMUSG00000070421	7.82989	2.49059	1.2303	2.02438	0.0429313	0.132321	Olfr658
ENSMUSG00000064412	1.81003	2.48776	1.75728	1.41569	0.156868		Gm22246
ENSMUSG00000095863	48.8625	2.48475	1.09481	2.26958	0.0232329	0.0840276	Ighv1-67
ENSMUSG00000114855	1.20504	2.48404	2.1987	1.12978	0.25857		AC154461.4
ENSMUSG00000097027	1.34245	2.48358	2.18139	1.13853	0.254898		Gm26559
ENSMUSG00000107428	0.832884	2.48245	4.85758	0.511046	0.609319		Gm44154
ENSMUSG00000074397	2.77232	2.48046	1.46929	1.6882	0.0913733		Foxr1
ENSMUSG00000069196	5.49767	2.47669	1.00808	2.45685	0.0140163		Gm10161
ENSMUSG00000098588	5.50118	2.47381	1.3777	1.79561	0.0725559		Mir6340
ENSMUSG00000082545	0.909521	2.47305	2.91873	0.847305	0.396825		Gm12196
ENSMUSG00000080711	4.53878	2.4725	1.12795	2.19203	0.0283775		Gm11686
ENSMUSG00000003420	2390.86	2.47225	0.356665	6.93158	4.16176e-12	1.41055e-09	Fcgrt
ENSMUSG00000092267	4.38628	2.47132	1.20759	2.04649	0.0407086		Gm20417
ENSMUSG00000095583	29.3304	2.46994	1.00963	2.44638	0.01443	0.0586259	Ighv14-2
ENSMUSG00000056071	20157.8	2.46795	0.820918	3.00633	0.00264426	0.0161064	S100a9
ENSMUSG00000101308	1.41087	2.46694	3.35403	0.735517	0.462024		Gm28989
ENSMUSG00000064833	2.71224	2.46601	1.63338	1.50976	0.131105		Gm25926
ENSMUSG00000062472	1.4291	2.4645	1.75756	1.40223	0.160847		Gm4945
ENSMUSG00000111637	1.61178	2.46413	1.57603	1.5635	0.117934		Gm10688
ENSMUSG00000094940	21.924	2.4632	1.52383	1.61645	0.105998	0.251798	Ighv1-84
ENSMUSG00000110661	0.715567	2.46265	3.56331	0.691113	0.489494		Gm31805
ENSMUSG00000076912	0.472931	2.46094	5.32776	0.46191	0.644146		Traj17
ENSMUSG00000097546	1.65124	2.46036	2.6156	0.940648	0.346885		Gm26749
ENSMUSG00000080922	7.46993	2.45999	1.05843	2.32418	0.0201161		Gm2214
ENSMUSG00000076759	5.33106	2.45874	1.80631	1.36119	0.173453		Trav2
ENSMUSG00000074677	278.593	2.45848	0.523661	4.6948	2.66869e-06	7.67854e-05	Sirpb1c
ENSMUSG00000101662	6.10407	2.45739	1.53761	1.59819	0.110002		Gm28499
ENSMUSG00000092523	2.08036	2.45585	1.70075	1.44398	0.148745		Gm18191
ENSMUSG00000030638	11.3182	2.45307	1.35832	1.80596	0.0709241	0.18976	Sh3gl3
ENSMUSG00000111823	0.961747	2.44967	3.93639	0.622314	0.533736		Gm2517
ENSMUSG00000109168	17.6647	2.44878	1.1072	2.21168	0.0269889	0.0940565	Gm44709
ENSMUSG00000114555	0.738766	2.44694	5.03169	0.486306	0.62675		AC141476.1
ENSMUSG00000097331	12.5773	2.44449	1.34451	1.81812	0.0690461	0.186608	F420014N23Rik
ENSMUSG00000089260	1.19221	2.44263	2.35385	1.03772	0.2994		Mir1929
ENSMUSG00000003555	1.58116	2.44218	2.24306	1.08877	0.276255		Cyp17a1
ENSMUSG00000112412	0.68933	2.44156	4.33043	0.563814	0.57288		Gm35239
ENSMUSG00000097376	3.51951	2.43687	0.99929	2.4386	0.0147441		Gm8705
ENSMUSG00000032487	1795.19	2.4349	1.09847	2.21663	0.0266486	0.093033	Ptgs2
ENSMUSG00000038418	7144.46	2.43475	0.612282	3.97651	6.99342e-05	0.00097319	Egr1
ENSMUSG00000081949	0.599858	2.43416	5.3135	0.458107	0.646875		Gm14392
ENSMUSG00000030187	193.99	2.43263	0.524808	4.63528	3.56459e-06	9.73785e-05	Klra2
ENSMUSG00000108844	1.42665	2.43236	1.74097	1.39713	0.162374		Gm6702
ENSMUSG00000052549	12.1911	2.43228	0.830562	2.92847	0.0034063	0.0195007	Arl13a
ENSMUSG00000096356	1.9351	2.42967	2.32386	1.04553	0.295778		Olfr889
ENSMUSG00000094087	18.8815	2.42948	1.41479	1.7172	0.0859424	0.218372	Ighv1-61
ENSMUSG00000097384	0.888109	2.42876	5.29475	0.45871	0.646442		Gm26815
ENSMUSG00000076674	59.5878	2.42867	0.915718	2.6522	0.00799682	0.0375699	Ighv3-8
ENSMUSG00000074695	24.2921	2.42766	0.996708	2.43567	0.0148641	0.059939	Il22
ENSMUSG00000109137	2.76001	2.42603	1.67002	1.45269	0.14631		Gm34908
ENSMUSG00000092495	5.93311	2.42581	1.63907	1.47998	0.138877		Gm20405
ENSMUSG00000086594	1.44516	2.42499	2.47273	0.980696	0.326743		Nudt12os
ENSMUSG00000114872	1.04859	2.42399	2.61919	0.925473	0.35472		CT009494.1
ENSMUSG00000083537	1.35759	2.42269	2.61201	0.927519	0.353657		Gm14942
ENSMUSG00000095028	212.283	2.4202	0.584469	4.14085	3.46016e-05	0.000571842	Sirpb1b
ENSMUSG00000105022	0.588023	2.42006	4.35504	0.555693	0.578421		Gm43537
ENSMUSG00000076512	34.3841	2.41776	1.60416	1.50719	0.131763	0.293055	Igkv9-123
ENSMUSG00000027702	2.59345	2.41604	2.24172	1.07776	0.28114		Lrrc34
ENSMUSG00000037101	0.547856	2.41565	5.3009	0.455706	0.648601		Ttc29
ENSMUSG00000064489	1.89911	2.4155	1.79368	1.34667	0.178086		Gm23296
ENSMUSG00000077549	5.50141	2.4154	1.37915	1.75137	0.0798821		Snord71
ENSMUSG00000065084	4.40479	2.41529	1.09839	2.19894	0.0278825		Gm26496
ENSMUSG00000090461	8.09739	2.41524	1.68147	1.43638	0.150893	0.321651	Iltifb
ENSMUSG00000081718	0.623002	2.41204	5.0416	0.478427	0.632346		Gm8261
ENSMUSG00000112977	1.7231	2.41124	2.21276	1.0897	0.275846		Gm34081
ENSMUSG00000111003	2.43408	2.40983	1.68611	1.42923	0.152938		AC120394.1
ENSMUSG00000081276	0.440106	2.40653	5.32246	0.452145	0.651164		Gm13132
ENSMUSG00000105392	7.32778	2.40295	0.946215	2.53954	0.0110997		Gm42684
ENSMUSG00000053469	17.0906	2.39945	1.20418	1.99261	0.0463044	0.139914	Tg
ENSMUSG00000098210	0.854629	2.39619	2.31901	1.03328	0.301471		Gm5224
ENSMUSG00000080478	1.52007	2.39253	1.82831	1.3086	0.19067		Snord23
ENSMUSG00000086717	0.963076	2.38843	3.11409	0.766975	0.443097		Gm15655
ENSMUSG00000041347	29.8028	2.38738	1.29326	1.84601	0.0648905	0.178415	Bdkrb1
ENSMUSG00000042250	1.5723	2.38542	3.04224	0.7841	0.432982		Pglyrp4
ENSMUSG00000111342	0.963173	2.38404	4.79575	0.497115	0.619108		4933404K13Rik
ENSMUSG00000027301	0.720107	2.38345	2.98348	0.798883	0.424359		Oxt
ENSMUSG00000100014	1.61184	2.38336	1.74264	1.36767	0.171416		Gm29290
ENSMUSG00000086395	4.31029	2.38312	1.54963	1.53787	0.124081		A630014C17Rik
ENSMUSG00000025321	100.021	2.37987	0.597415	3.98361	6.78772e-05	0.000951852	Itgb8
ENSMUSG00000105395	2.33601	2.37969	1.98086	1.20134	0.229618		Gm42672
ENSMUSG00000112553	1.30254	2.37943	2.66169	0.893957	0.371345		Gm4556
ENSMUSG00000058914	3.32818	2.37794	2.0137	1.18088	0.23765		C1qtnf3
ENSMUSG00000108858	7.41528	2.37729	0.775076	3.06717	0.00216096		Gm4587
ENSMUSG00000094345	62.4742	2.37659	1.69399	1.40295	0.160631	0.334845	Igkv14-126
ENSMUSG00000109428	11.5868	2.37635	0.997652	2.38194	0.0172217	0.0671049	Gm45698
ENSMUSG00000022321	1.03905	2.37614	3.05812	0.776994	0.437162		Cdh10
ENSMUSG00000023192	3.09344	2.3759	1.56707	1.51614	0.129483		Grm2
ENSMUSG00000095892	3.72584	2.37234	1.30945	1.81171	0.070031		Rnu5g
ENSMUSG00000108599	4.66567	2.3703	0.990131	2.39393	0.0166689		Gm10616
ENSMUSG00000103126	8.04391	2.37026	1.07504	2.20481	0.0274674	0.0952758	Gm37387
ENSMUSG00000100767	0.503295	2.36889	5.31364	0.445814	0.655732		Gm3508
ENSMUSG00000102994	0.417512	2.36754	4.52565	0.523137	0.600879		Gm37767
ENSMUSG00000022878	15.3536	2.36601	1.54965	1.5268	0.126811	0.285383	Adipoq
ENSMUSG00000111523	31.1986	2.36562	1.28433	1.84191	0.0654887	0.179616	CAAA01125382.4
ENSMUSG00000074987	1.52796	2.3647	3.19078	0.741103	0.458631		Wt1os
ENSMUSG00000105970	19.3661	2.36416	0.888049	2.6622	0.00776321	0.0367957	Gm43360
ENSMUSG00000028195	878.766	2.36408	0.476982	4.95633	7.18357e-07	2.7155e-05	Cyr61
ENSMUSG00000052270	715.752	2.36144	0.627144	3.76538	0.000166294	0.00189697	Fpr2
ENSMUSG00000110481	5.30855	2.3611	1.63422	1.44479	0.148517		Gm45705
ENSMUSG00000112683	2.03564	2.36107	1.78837	1.32024	0.186756		Gm18904
ENSMUSG00000113510	4.43428	2.35962	1.34709	1.75164	0.0798365		Gm7239
ENSMUSG00000034810	32.7798	2.35939	1.06386	2.21775	0.0265717	0.0929085	Scn7a
ENSMUSG00000083922	0.488169	2.35836	3.22832	0.730521	0.465072		Gm3835
ENSMUSG00000029307	2.70939	2.35826	3.26123	0.723118	0.469607		Dmp1
ENSMUSG00000114113	5.19221	2.35721	1.02731	2.29455	0.0217589		AC131759.1
ENSMUSG00000102280	0.876906	2.35611	3.88719	0.606122	0.544434		Gm36999
ENSMUSG00000020067	0.62456	2.35579	5.12797	0.459399	0.645948		Mypn
ENSMUSG00000103291	1.13616	2.35513	4.40184	0.535034	0.592626		Gm38235
ENSMUSG00000033910	18.383	2.35403	1.12452	2.09336	0.0363174	0.116796	Gucy1a3
ENSMUSG00000043017	25.0105	2.35401	1.05486	2.23159	0.0256424	0.0905795	Ptgir
ENSMUSG00000041857	5.32918	2.35397	1.7698	1.33008	0.183493		Oosp1
ENSMUSG00000098223	1.9577	2.35376	1.8276	1.28789	0.197783		Gm4891
ENSMUSG00000101671	5.12912	2.3533	1.31268	1.79274	0.073015		Gm28221
ENSMUSG00000096976	15.3052	2.35244	1.18265	1.98913	0.0466872	0.140711	Gm26882
ENSMUSG00000082247	1.54747	2.34983	1.48689	1.58037	0.114022		Gm16074
ENSMUSG00000086459	3.19647	2.34923	1.26907	1.85115	0.0641485		1700030C12Rik
ENSMUSG00000024211	0.466976	2.34901	5.33588	0.44023	0.659771		Grm8
ENSMUSG00000103611	0.986906	2.3489	3.89596	0.602905	0.546572		Gm37195
ENSMUSG00000107701	0.778814	2.34703	4.00404	0.586165	0.557765		Gm19287
ENSMUSG00000027070	8.59269	2.34269	1.59019	1.47322	0.140693	0.307042	Lrp2
ENSMUSG00000100383	0.884327	2.34266	2.11012	1.1102	0.266912		Gm28688
ENSMUSG00000083016	2.44863	2.3413	1.3047	1.79451	0.0727313		Gm12618
ENSMUSG00000099841	0.431903	2.33765	5.33441	0.43822	0.661227		Gm28855
ENSMUSG00000085223	2.48618	2.33758	1.57598	1.48325	0.138007		Gm11210
ENSMUSG00000101199	2.80256	2.33428	1.37863	1.69319	0.0904198		Gm9687
ENSMUSG00000063166	0.665604	2.33354	3.11445	0.74926	0.4537		Gm5449
ENSMUSG00000027827	10.7613	2.33243	1.21967	1.91235	0.0558311	0.160341	Kcnab1
ENSMUSG00000092550	23.5299	2.33016	0.995381	2.34097	0.0192337	0.073121	Gm20496
ENSMUSG00000050875	0.71341	2.32835	5.3261	0.437158	0.661997		A730017C20Rik
ENSMUSG00000094689	2.15703	2.32735	3.30589	0.704001	0.481432		Ighv1-81
ENSMUSG00000001773	0.674936	2.32483	5.29249	0.439269	0.660466		Folh1
ENSMUSG00000106610	6.64325	2.32366	1.00171	2.3197	0.0203571		Gm43103
ENSMUSG00000094006	323.358	2.3181	0.918627	2.52344	0.0116213	0.0500627	Igkv4-59
ENSMUSG00000100160	20.9405	2.31613	0.567253	4.08307	4.44445e-05	0.000695972	Gm28527
ENSMUSG00000081238	6.50849	2.31585	0.855111	2.70824	0.00676405		Gm15836
ENSMUSG00000067215	1.37564	2.30629	2.12205	1.08682	0.277116		Usp51
ENSMUSG00000098164	0.974669	2.30377	2.91147	0.791275	0.428783		Gm5493
ENSMUSG00000074874	1.25208	2.30348	2.60981	0.882621	0.377441		Ctla2b
ENSMUSG00000103899	2.01958	2.30234	1.99	1.15696	0.247289		Gm37940
ENSMUSG00000103343	1.52411	2.3019	2.25996	1.01856	0.308412		Gm37052
ENSMUSG00000100130	3.92692	2.30133	1.69147	1.36055	0.173655		Gm28379
ENSMUSG00000095416	32.5213	2.29872	1.24951	1.83969	0.0658132	0.180184	Ighv1-12
ENSMUSG00000100620	0.778323	2.2982	4.00851	0.573331	0.566421		Gm28277
ENSMUSG00000077569	3.1315	2.29671	1.91117	1.20173	0.229469		Gm24608
ENSMUSG00000081946	2.28872	2.29597	1.48142	1.54984	0.12118		Gm11472
ENSMUSG00000102571	6.31584	2.29531	1.18161	1.94252	0.052074		Gm37967
ENSMUSG00000083072	1.07406	2.29504	2.42134	0.947837	0.343213		Gm13668
ENSMUSG00000083215	2.25845	2.29474	2.02831	1.13136	0.257905		Rbmx2-ps
ENSMUSG00000063234	150.868	2.294	0.771017	2.97529	0.00292707	0.0174101	Gpr84
ENSMUSG00000030158	1.64226	2.29205	2.47839	0.924816	0.355062		Clec12b
ENSMUSG00000112822	5.27706	2.29014	1.34863	1.69813	0.0894837		A130012E19Rik
ENSMUSG00000097637	0.723563	2.2898	3.52143	0.650248	0.515532		4933417D19Rik
ENSMUSG00000085604	6.84301	2.28787	1.19646	1.9122	0.0558499		Dhx58os
ENSMUSG00000095630	389.795	2.28705	0.730964	3.12882	0.00175513	0.0117435	Igkv6-23
ENSMUSG00000040231	3.08356	2.28599	1.19484	1.91321	0.0557212		Syngr4
ENSMUSG00000109958	1.8251	2.28376	1.79703	1.27085	0.203782		Gm32786
ENSMUSG00000097052	0.647291	2.28052	3.5423	0.643797	0.519707		Snhg7
ENSMUSG00000030324	2.23836	2.28023	1.66156	1.37234	0.169956		Rho
ENSMUSG00000043298	0.777205	2.27967	5.31548	0.428874	0.668015		Smco3
ENSMUSG00000080538	3.45333	2.27916	1.41207	1.61405	0.106517		Gm25541
ENSMUSG00000072589	1.10968	2.27792	2.6546	0.858104	0.390835		Gm10371
ENSMUSG00000110759	2.29389	2.27694	1.70932	1.33208	0.182834		Gm6607
ENSMUSG00000102538	0.457189	2.27435	5.33365	0.426416	0.669805		Gm37230
ENSMUSG00000109811	0.593696	2.27178	5.31541	0.427395	0.669092		Tpt1-ps4
ENSMUSG00000080383	2.52889	2.2709	1.39385	1.62923	0.103264		Gm22103
ENSMUSG00000087670	3.22613	2.2709	1.24021	1.83106	0.0670921		9530036M11Rik
ENSMUSG00000042265	1267.77	2.26673	0.664076	3.41336	0.000641676	0.0054005	Trem1
ENSMUSG00000106182	0.717013	2.26638	5.00899	0.452463	0.650936		Gm7442
ENSMUSG00000081263	6.35126	2.26373	0.76854	2.94549	0.00322441		Gm14859
ENSMUSG00000102460	46.1581	2.26208	0.663314	3.41026	0.000649	0.00544153	Gm38197
ENSMUSG00000013158	0.696102	2.26093	4.97378	0.454569	0.649419		4933405L10Rik
ENSMUSG00000115239	0.461098	2.25908	4.37295	0.516604	0.605433		AC164100.1
ENSMUSG00000026678	198.609	2.25886	1.38865	1.62666	0.10381	0.248244	Rgs5
ENSMUSG00000087181	0.536682	2.25875	5.21422	0.43319	0.664877		Gm13570
ENSMUSG00000104479	1.19488	2.2551	3.73525	0.603734	0.54602		Gm10305
ENSMUSG00000076761	5.56556	2.25483	1.60974	1.40074	0.161293		Trav5-1
ENSMUSG00000112581	0.826071	2.25353	4.09225	0.550683	0.581851		1700022H01Rik
ENSMUSG00000097154	39.4927	2.24918	0.804935	2.79424	0.00520218	0.0269154	Gm26510
ENSMUSG00000088208	1.17685	2.24876	2.68702	0.836897	0.40265		Gm23751
ENSMUSG00000090067	0.846589	2.24859	3.4132	0.658793	0.510029		Gm2976
ENSMUSG00000061292	2.83704	2.24604	1.75218	1.28185	0.199894		Cyp3a59
ENSMUSG00000109036	18.0479	2.24496	1.25999	1.78173	0.0747938	0.197446	2210406H18Rik
ENSMUSG00000110936	0.499347	2.24476	5.34074	0.420308	0.67426		Gm19212
ENSMUSG00000113335	1.43869	2.24189	2.20275	1.01777	0.308787		AC166349.1
ENSMUSG00000058925	1.10642	2.24175	2.09017	1.07252	0.283486		1700011I03Rik
ENSMUSG00000076910	0.765201	2.24065	5.32192	0.421023	0.673738		Traj19
ENSMUSG00000094733	5.58147	2.24014	2.29556	0.97586	0.329134		Gm5416
ENSMUSG00000113707	0.686864	2.23957	5.32671	0.420441	0.674163		Gm10457
ENSMUSG00000094491	29.7828	2.23908	1.58327	1.41422	0.157298	0.330132	Igkv1-133
ENSMUSG00000092457	1.05433	2.23874	4.51487	0.495859	0.619994		Gm8835
ENSMUSG00000104621	1.46457	2.23842	2.95599	0.757247	0.448902		Gm43185
ENSMUSG00000104834	0.503315	2.23789	5.34135	0.418974	0.675235		Gm8861
ENSMUSG00000090665	18.9424	2.23731	0.940043	2.38001	0.0173122	0.0673396	Gad1-ps
ENSMUSG00000038156	256.736	2.23696	0.720711	3.10382	0.00191037	0.0125416	Spon1
ENSMUSG00000081751	11.8111	2.23644	0.695923	3.21363	0.0013107	0.00937078	Gm14251
ENSMUSG00000079076	0.730878	2.23452	5.04186	0.443194	0.657626		Gm3086
ENSMUSG00000114036	2.70454	2.23151	1.41514	1.57688	0.114824		AC124426.2
ENSMUSG00000038218	91.3527	2.22992	0.902701	2.47027	0.013501	0.0559456	Gm9765
ENSMUSG00000086539	2.86455	2.22857	1.47424	1.51168	0.130616		Gm16759
ENSMUSG00000115555	0.520762	2.22809	5.33873	0.417346	0.676426		AC174647.1
ENSMUSG00000094322	21.0366	2.22802	1.05702	2.10782	0.0350461	0.113769	Ighv9-4
ENSMUSG00000045761	1.01832	2.2268	3.48866	0.638297	0.52328		Togaram2
ENSMUSG00000115757	0.782373	2.22659	5.31737	0.418739	0.675407		AC163646.4
ENSMUSG00000024529	267.821	2.22558	1.478	1.5058	0.132118	0.293715	Lox
ENSMUSG00000115283	0.814252	2.22496	2.69724	0.824905	0.409426		AC154616.2
ENSMUSG00000087035	0.458037	2.22311	5.31894	0.417962	0.675975		Tmem74bos
ENSMUSG00000109735	1.24511	2.22153	3.81122	0.58289	0.559967		Gm45667
ENSMUSG00000101246	0.960427	2.21757	5.28012	0.419986	0.674496		Gm29026
ENSMUSG00000113489	1.65227	2.21568	2.17049	1.02082	0.307339		Gm16381
ENSMUSG00000085995	14.9106	2.21502	0.852381	2.59863	0.00935965	0.0424506	Gm2788
ENSMUSG00000103254	18.4096	2.2149	1.19063	1.86028	0.0628458	0.174303	Ighv1-15
ENSMUSG00000095351	109.508	2.21425	0.682383	3.24488	0.00117501	0.00857233	Igkv3-2
ENSMUSG00000101903	0.983792	2.21398	4.64464	0.476674	0.633594		Gm29291
ENSMUSG00000110127	0.76988	2.21299	5.32771	0.415373	0.677869		6430710M23Rik
ENSMUSG00000107389	0.883012	2.2125	2.16064	1.024	0.305833		Gm43124
ENSMUSG00000074281	2.57933	2.20989	1.31303	1.68305	0.0923656		Gm12522
ENSMUSG00000076532	261.33	2.20783	1.12615	1.96052	0.0499354	0.147716	Igkv4-91
ENSMUSG00000044629	35.2699	2.20695	0.675158	3.2688	0.00108005	0.00806491	Cnrip1
ENSMUSG00000025355	460.348	2.20665	0.791369	2.78839	0.00529703	0.0273425	Mmp19
ENSMUSG00000114739	5.0843	2.20601	1.12615	1.95889	0.0501261		AC158525.1
ENSMUSG00000062170	3.01206	2.20598	2.15109	1.02552	0.30512		Fmr1nb
ENSMUSG00000110153	1.25017	2.20583	3.67867	0.599628	0.548754		Gm17766
ENSMUSG00000106663	1.87489	2.20366	1.64569	1.33905	0.180556		Gm42839
ENSMUSG00000073804	0.855673	2.20334	2.83632	0.776828	0.43726		Nps
ENSMUSG00000023349	445.069	2.20206	0.3934	5.59752	2.17442e-08	1.78205e-06	Clec4n
ENSMUSG00000084477	1.09651	2.20132	2.88357	0.7634	0.445225		Gm25780
ENSMUSG00000032179	124.083	2.19995	1.16889	1.88209	0.0598235	0.168492	Bmp5
ENSMUSG00000108126	0.73971	2.19935	4.9702	0.442508	0.658122		Gm43909
ENSMUSG00000107604	3.89697	2.19782	1.05476	2.08371	0.0371865		Gm44041
ENSMUSG00000093953	0.813581	2.19721	4.14396	0.530219	0.59596		Trav3d-3
ENSMUSG00000055523	1.93776	2.19703	2.04798	1.07278	0.28337		Gucy2g
ENSMUSG00000030519	104.043	2.19703	1.60684	1.3673	0.171531	0.349975	Apba2
ENSMUSG00000056073	0.992942	2.19655	5.32534	0.412471	0.679994		Grik2
ENSMUSG00000041309	3.16198	2.19598	1.69829	1.29305	0.195993		Nkx6-2
ENSMUSG00000097459	1.22447	2.19547	2.41518	0.90903	0.363334		Gm26895
ENSMUSG00000081583	1.15132	2.19278	2.38391	0.919825	0.357664		Gm14769
ENSMUSG00000115206	0.491672	2.19243	5.29086	0.414381	0.678595		AC137902.1
ENSMUSG00000111108	3.79213	2.19221	1.10017	1.99261	0.0463037		Gm17795
ENSMUSG00000045871	10.2484	2.19158	1.43455	1.52772	0.126583	0.285078	Slitrk6
ENSMUSG00000006522	13.5748	2.19093	1.58046	1.38626	0.165666	0.341951	Itih3
ENSMUSG00000083834	8.3095	2.18917	1.02957	2.1263	0.0334782	0.110127	Gm12577
ENSMUSG00000081733	2.2734	2.18792	1.48371	1.47463	0.140311		Gm12852
ENSMUSG00000100041	1.37138	2.18655	2.13013	1.02649	0.304661		Gm5702
ENSMUSG00000089475	2.0598	2.18489	1.64767	1.32604	0.184825		Gm25363
ENSMUSG00000021010	1.94667	2.1836	3.03717	0.718958	0.472167		Npas3
ENSMUSG00000044306	2.77294	2.18331	1.23084	1.77384	0.0760903		4930500M09Rik
ENSMUSG00000106698	2.56644	2.18263	1.58802	1.37443	0.169307		Gm43599
ENSMUSG00000060615	32414.4	2.17991	1.15915	1.88062	0.0600238	0.168889	Ang4
ENSMUSG00000097685	0.764712	2.17971	3.44878	0.632024	0.527371		Gm26646
ENSMUSG00000034209	2.6412	2.17967	1.68124	1.29646	0.194815		Rasl10a
ENSMUSG00000093262	2.32859	2.17954	1.46196	1.49083	0.136007		Gm23413
ENSMUSG00000102424	0.605628	2.17851	3.70876	0.587396	0.556938		Paupar
ENSMUSG00000105990	6.43275	2.17715	1.17457	1.85357	0.0638006		Gm43307
ENSMUSG00000114075	4.20586	2.1768	1.20402	1.80794	0.0706156		Gm16368
ENSMUSG00000106218	1.92483	2.1766	1.6216	1.34226	0.179513		Gm43713
ENSMUSG00000084781	0.779256	2.17656	4.85458	0.448351	0.6539		D930015M05Rik
ENSMUSG00000071561	875.961	2.17637	1.40965	1.54391	0.12261	0.27849	BC100530
ENSMUSG00000031789	3.09051	2.17634	1.32426	1.64344	0.100292		Cngb1
ENSMUSG00000105924	1.79409	2.17582	1.3768	1.58035	0.114028		Gm44359
ENSMUSG00000110240	3.75137	2.17561	2.01267	1.08096	0.279716		Gm45486
ENSMUSG00000115044	1.04216	2.17506	2.52567	0.861181	0.389138		CT573086.2
ENSMUSG00000025480	64.8589	2.17261	0.871084	2.49414	0.0126263	0.0532632	Syce1
ENSMUSG00000112841	0.960084	2.17146	2.56181	0.847625	0.396647		AC164567.3
ENSMUSG00000090894	0.885917	2.17063	2.82329	0.768829	0.441995		Olfr110
ENSMUSG00000020125	0.423076	2.17021	5.3314	0.407061	0.683963		Elane
ENSMUSG00000101483	0.684716	2.17001	3.554	0.610581	0.541477		1700016L21Rik
ENSMUSG00000054641	82.4264	2.16861	0.748429	2.89755	0.00376088	0.0210603	Mmrn1
ENSMUSG00000096336	201.072	2.16829	0.858955	2.52434	0.0115917	0.0499569	Igkv1-135
ENSMUSG00000097591	1.37928	2.16507	2.35599	0.918964	0.358114		A330032B11Rik
ENSMUSG00000083482	6.10723	2.16313	1.01288	2.13561	0.0327112		Gm14706
ENSMUSG00000035352	13.9503	2.16145	1.20857	1.78844	0.0737044	0.195499	Ccl12
ENSMUSG00000110311	2.25858	2.16104	1.34909	1.60185	0.109189		Gm45410
ENSMUSG00000057945	2.26312	2.16091	1.54021	1.40299	0.16062		Gm17136
ENSMUSG00000073631	8.43582	2.15819	1.08443	1.99015	0.0465741	0.140559	Gm10553
ENSMUSG00000107771	0.391276	2.15799	5.31951	0.405674	0.684982		Gm8956
ENSMUSG00000112879	0.913005	2.15734	4.73832	0.455297	0.648896		AC158802.1
ENSMUSG00000102731	0.862803	2.15733	2.94421	0.732737	0.463719		Gm38261
ENSMUSG00000080626	1.2753	2.15679	2.18327	0.98787	0.323216		Mir1192
ENSMUSG00000079543	118.383	2.15611	0.685211	3.14664	0.00165161	0.0112109	Igkv13-85
ENSMUSG00000078759	3.1243	2.15481	1.86515	1.1553	0.247966		Scgb1b7
ENSMUSG00000112413	1.11728	2.15404	2.00286	1.07548	0.282161		Gm6867
ENSMUSG00000046280	15.2124	2.1539	0.860427	2.50329	0.0123045	0.0522849	She
ENSMUSG00000086556	1.81994	2.15359	2.04481	1.0532	0.292251		Gm15444
ENSMUSG00000087167	0.457862	2.15276	5.31812	0.404797	0.685627		Gm15891
ENSMUSG00000096855	0.507733	2.15267	5.30814	0.405542	0.685079		n-R5s120
ENSMUSG00000025003	0.440423	2.15233	5.30706	0.40556	0.685066		Cyp2c39
ENSMUSG00000079138	4.16137	2.15208	1.60202	1.34336	0.179157		Gm8818
ENSMUSG00000037451	4.01623	2.15141	1.71075	1.25758	0.208543		Slc22a20
ENSMUSG00000091494	0.466292	2.15075	5.33217	0.403354	0.686688		Gm3269
ENSMUSG00000096510	0.939835	2.14981	2.92686	0.734511	0.462637		Gm25892
ENSMUSG00000109982	1.0902	2.14906	3.10874	0.691296	0.489379		Gm45520
ENSMUSG00000101372	3.66367	2.14849	1.20422	1.78414	0.0744012		Gm19028
ENSMUSG00000110131	0.693242	2.14791	3.56072	0.603223	0.546361		Gm18066
ENSMUSG00000097289	1.6984	2.14703	2.31939	0.925686	0.354609		2010300F17Rik
ENSMUSG00000109776	0.474644	2.14418	5.32234	0.402864	0.687048		Gm30400
ENSMUSG00000030495	0.563607	2.14335	5.33151	0.402015	0.687673		Slc7a10
ENSMUSG00000096055	1.56218	2.14304	2.73692	0.783011	0.433621		Trav12n-1
ENSMUSG00000091227	0.554396	2.1417	5.33365	0.401544	0.68802		Gm3755
ENSMUSG00000097068	1.97383	2.14163	1.80168	1.18868	0.234564		Gm26760
ENSMUSG00000024261	2.71843	2.13936	1.57551	1.35788	0.174501		Syt4
ENSMUSG00000103766	0.389012	2.13926	5.32586	0.401674	0.687924		Gm38392
ENSMUSG00000089686	1.17418	2.13924	1.51193	1.41491	0.157096		Mnd1-ps
ENSMUSG00000101555	2.23219	2.13789	1.69928	1.25811	0.208351		Gm28731
ENSMUSG00000096498	44.9094	2.13682	1.30348	1.63931	0.101148	0.244312	Ighv2-5
ENSMUSG00000111621	0.556394	2.13679	5.26959	0.405494	0.685115		Gm7802
ENSMUSG00000107724	2.6515	2.13669	1.31603	1.62358	0.104465		Gm16042
ENSMUSG00000080774	2.24153	2.13576	1.20294	1.77545	0.0758232		Gm9143
ENSMUSG00000067878	6.89214	2.13413	1.36798	1.56005	0.118747		Map7d3
ENSMUSG00000097719	1.25862	2.13315	1.6291	1.3094	0.190399		Rpl31-ps18
ENSMUSG00000094877	0.898173	2.13235	4.05024	0.526474	0.598559		Trav3n-3
ENSMUSG00000109051	1.38687	2.13163	1.75735	1.21298	0.225136		Gm44913
ENSMUSG00000106090	0.975876	2.13057	1.76396	1.20783	0.227113		Gm43704
ENSMUSG00000046856	2.36995	2.13021	1.72803	1.23274	0.217674		Gpr1
ENSMUSG00000076864	7.90891	2.12981	1.03861	2.05065	0.0403015	0.126199	Trdv1
ENSMUSG00000079143	1.53328	2.12854	1.87546	1.13494	0.256399		Atxn7l1os1
ENSMUSG00000031342	118.62	2.12784	0.709608	2.99861	0.00271214	0.0164222	Gpm6b
ENSMUSG00000080701	4.0594	2.12682	1.37301	1.54902	0.121377		Gm12340
ENSMUSG00000115843	2.0412	2.12568	1.29459	1.64198	0.100595		AC137902.2
ENSMUSG00000026531	23710.5	2.12529	0.818156	2.59766	0.00938617	0.0425388	Mptx1
ENSMUSG00000096169	2.23275	2.12436	1.4979	1.41823	0.156124		Olfr1564
ENSMUSG00000087256	0.757816	2.11915	3.50468	0.604663	0.545403		Gm15990
ENSMUSG00000112265	1.61332	2.11879	2.02252	1.0476	0.294823		Gm34983
ENSMUSG00000097768	8.10613	2.11806	0.920464	2.30108	0.0213874	0.0790396	2310043M15Rik
ENSMUSG00000082054	0.675675	2.11788	5.28116	0.401026	0.688401		Psmb6-ps
ENSMUSG00000104554	6.21037	2.11576	1.72163	1.22893	0.219099		Gm4610
ENSMUSG00000081551	1.07795	2.11568	2.23289	0.947509	0.343379		Gm14654
ENSMUSG00000092218	1.34011	2.11428	3.23427	0.653713	0.513297		Gm20529
ENSMUSG00000038086	11.7315	2.11316	1.51318	1.39651	0.162562	0.337819	Hspb2
ENSMUSG00000076870	0.54127	2.11264	5.35376	0.394608	0.693132		Trdj1
ENSMUSG00000079578	16.1509	2.10884	0.702435	3.00219	0.00268047	0.0162873	Gm1140
ENSMUSG00000064999	4.50678	2.10763	1.59982	1.31742	0.187699		Gm26035
ENSMUSG00000108524	2.03904	2.10732	2.76576	0.761931	0.446101		Gm44876
ENSMUSG00000101937	0.727242	2.1072	3.52513	0.597765	0.549997		Gm5268
ENSMUSG00000113178	1.86757	2.10637	1.72474	1.22126	0.221986		Mylf-ps
ENSMUSG00000052301	6.40298	2.10546	1.04279	2.01906	0.0434807		Doc2a
ENSMUSG00000031698	2.69923	2.10453	1.7834	1.18007	0.237974		Mylk3
ENSMUSG00000057457	1.53481	2.10448	2.93683	0.716582	0.473632		Phex
ENSMUSG00000104108	1.0617	2.10366	3.81374	0.5516	0.581222		Gm37876
ENSMUSG00000102099	3.27031	2.10176	2.15827	0.973815	0.330149		1700011B04Rik
ENSMUSG00000038968	4.72686	2.1016	0.874213	2.40399	0.0162174		Klk1b16
ENSMUSG00000096023	1.22293	2.1013	1.49577	1.40482	0.160074		Gm3542
ENSMUSG00000102919	3.59117	2.101	1.80989	1.16085	0.245705		Gm37726
ENSMUSG00000079180	25749.5	2.10032	0.794868	2.64236	0.00823312	0.038463	Mptx2
ENSMUSG00000048485	1.44772	2.09969	2.32369	0.903604	0.366206		Zbtb8b
ENSMUSG00000048337	1.16856	2.09808	3.55343	0.59044	0.554896		Npy4r
ENSMUSG00000106885	1.75712	2.09685	1.75211	1.19676	0.2314		Eif3s6-ps4
ENSMUSG00000096600	0.700743	2.09669	4.97283	0.421629	0.673296		Trav6d-3
ENSMUSG00000068506	30.933	2.09634	0.830164	2.52521	0.0115629	0.0498754	Gm5800
ENSMUSG00000079045	0.395262	2.09542	5.3094	0.394663	0.693092		Prox1os
ENSMUSG00000069733	1.21338	2.09527	1.96439	1.06663	0.286139		Ube2u
ENSMUSG00000084041	2.0516	2.09279	1.7432	1.20055	0.229926		Gm15312
ENSMUSG00000022602	371.718	2.09209	0.524759	3.98677	6.69784e-05	0.000943319	Arc
ENSMUSG00000095272	3.95213	2.09162	1.24904	1.67458	0.0940158		Gm24242
ENSMUSG00000104721	11.8587	2.09077	0.8355	2.50241	0.0123349	0.052369	Gm42696
ENSMUSG00000039375	1.43395	2.0906	1.94604	1.07429	0.282695		Wdr17
ENSMUSG00000077345	1.18717	2.09037	2.50217	0.835423	0.40348		Snord70
ENSMUSG00000094420	547.534	2.08944	0.875751	2.38589	0.0170381	0.066571	Igkv10-96
ENSMUSG00000095180	7.55903	2.08915	1.83267	1.13995	0.254309		Rhox5
ENSMUSG00000075549	1.93408	2.08895	1.96434	1.06344	0.287584		Gm6878
ENSMUSG00000093873	5.06295	2.08838	1.05981	1.97051	0.0487799		Gm24540
ENSMUSG00000101026	3.37904	2.08791	1.21322	1.72097	0.0852563		D730001G18Rik
ENSMUSG00000084072	0.92125	2.08745	2.78581	0.749314	0.453668		Gm11285
ENSMUSG00000111459	0.90336	2.08713	2.66207	0.784027	0.433024		Gm8031
ENSMUSG00000091732	14.392	2.08457	0.735286	2.83505	0.00458188	0.0244265	Gm17541
ENSMUSG00000094356	73.007	2.08421	0.927202	2.24785	0.0245859	0.0876682	Igkv8-28
ENSMUSG00000097111	2.26469	2.08337	1.76921	1.17757	0.238968		Peak1os
ENSMUSG00000113961	2.01435	2.08131	1.88251	1.1056	0.268898		AC132221.1
ENSMUSG00000066158	2.7651	2.07926	1.29881	1.6009	0.109399		AY512931
ENSMUSG00000022651	4650.6	2.07878	1.0686	1.94532	0.051736	0.151429	Retnlg
ENSMUSG00000108737	3.09197	2.0785	1.4777	1.40658	0.159553		BC060293
ENSMUSG00000115472	0.859996	2.0773	3.5854	0.579378	0.562334		AC156574.2
ENSMUSG00000108670	0.659624	2.07634	4.13131	0.502586	0.615255		Gm44815
ENSMUSG00000046178	1.51428	2.07475	2.21671	0.935958	0.349295		Nxph1
ENSMUSG00000083372	1.75536	2.07459	1.99343	1.04071	0.298008		Gm11235
ENSMUSG00000082730	1.67719	2.07419	1.99613	1.03911	0.298755		Gm11363
ENSMUSG00000021943	19.182	2.07388	0.830312	2.49771	0.0124997	0.0528113	Gdf10
ENSMUSG00000066516	11.4366	2.07316	0.764695	2.7111	0.00670614	0.0328698	Klk1b21
ENSMUSG00000082069	29.14	2.07246	0.900914	2.3004	0.0214255	0.0791221	Gm16242
ENSMUSG00000044103	536.881	2.07204	0.782231	2.64889	0.00807562	0.0378547	Il1f9
ENSMUSG00000094185	29.0874	2.07199	0.445049	4.65564	3.22969e-06	9.0454e-05	Gm5445
ENSMUSG00000023992	49.1275	2.07165	0.69093	2.99835	0.00271446	0.0164289	Trem2
ENSMUSG00000104887	1.33395	2.07153	3.19769	0.64782	0.517101		Gm43158
ENSMUSG00000099600	0.544473	2.0693	5.32138	0.388865	0.697376		Gm29126
ENSMUSG00000105986	2.10266	2.0679	1.63461	1.26507	0.205847		Gm43065
ENSMUSG00000102157	1.71094	2.06761	2.63155	0.785701	0.432043		Gm37470
ENSMUSG00000113600	24.3124	2.06662	0.568737	3.63371	0.000279373	0.00284272	Gm7868
ENSMUSG00000102286	3.9956	2.06658	1.18877	1.73842	0.0821361		Gm37004
ENSMUSG00000108244	0.450462	2.06617	5.31997	0.388379	0.697735		Gm44077
ENSMUSG00000095689	1.55318	2.06557	2.66683	0.77454	0.438612		Trav12d-1
ENSMUSG00000115841	11.6131	2.06546	0.707157	2.92079	0.00349143	0.0198636	AC164883.9
ENSMUSG00000103223	0.772842	2.06536	5.32839	0.387614	0.698302		Gm37730
ENSMUSG00000027261	3.57729	2.06465	2.27921	0.905864	0.365008		Hao1
ENSMUSG00000031290	6.07161	2.06461	1.73421	1.19052	0.233841		Lrch2
ENSMUSG00000078780	78.5157	2.06342	0.880468	2.34355	0.0191014	0.0727147	Gm5150
ENSMUSG00000110462	0.613595	2.06216	3.1126	0.662521	0.507638		Gm35572
ENSMUSG00000114193	34.8115	2.06186	0.681788	3.0242	0.00249289	0.0153954	AC122828.3
ENSMUSG00000064427	19.1744	2.0611	1.02399	2.01281	0.0441346	0.134965	Gm22748
ENSMUSG00000048699	2377.73	2.06086	0.779944	2.64231	0.00823425	0.038463	Krt90
ENSMUSG00000094162	5.51257	2.0605	1.79164	1.15006	0.250118		Ccl19-ps3
ENSMUSG00000085132	2.83229	2.06023	1.75377	1.17474	0.240099		Gm12265
ENSMUSG00000089337	0.909232	2.05951	3.81809	0.539409	0.589605		Gm24346
ENSMUSG00000107831	0.790017	2.05715	3.48921	0.589575	0.555476		Gm44420
ENSMUSG00000109656	5.07451	2.05692	2.31992	0.886634	0.375276		Gm45548
ENSMUSG00000115698	1.42152	2.05671	3.0173	0.681639	0.495467		AC125087.1
ENSMUSG00000035373	332.031	2.05658	0.916575	2.24377	0.0248475	0.0883647	Ccl7
ENSMUSG00000070390	32.3218	2.05459	0.594059	3.45856	0.000543078	0.00476522	Nlrp1b
ENSMUSG00000092301	3.87113	2.05445	1.14564	1.79328	0.0729283		Gm6887
ENSMUSG00000094443	0.626683	2.05386	5.1038	0.402418	0.687376		Sgo2b
ENSMUSG00000034732	0.466869	2.05296	5.34632	0.383994	0.700983		Pabpc5
ENSMUSG00000063713	11.2998	2.05218	0.732031	2.8034	0.00505663	0.0263601	Klk1b24
ENSMUSG00000107451	3.73224	2.05133	1.35436	1.51462	0.12987		Gm44421
ENSMUSG00000100959	1.51144	2.04982	1.42008	1.44346	0.148892		Gm7654
ENSMUSG00000096732	1.88413	2.04975	2.19973	0.931818	0.351431		Gm8897
ENSMUSG00000105606	84.9918	2.04798	0.904159	2.26506	0.0235089	0.0848262	Igkv2-109
ENSMUSG00000104904	1.90643	2.04777	1.6451	1.24477	0.213214		9330198I05Rik
ENSMUSG00000109793	1.03682	2.04744	2.11108	0.969855	0.332119		Gm10043
ENSMUSG00000106321	0.389891	2.04736	5.33829	0.383524	0.701331		Gm43674
ENSMUSG00000091401	3.57177	2.04521	1.35887	1.50508	0.132303		Gm9252
ENSMUSG00000005124	24.3771	2.04407	1.29538	1.57797	0.114573	0.26569	Wisp1
ENSMUSG00000111512	1.95754	2.04293	1.49563	1.36594	0.171958		AC112680.1
ENSMUSG00000093858	0.99018	2.04228	2.67681	0.762952	0.445492		Gm19967
ENSMUSG00000037578	2.80765	2.04214	1.37805	1.4819	0.138366		Pkd2l1
ENSMUSG00000093452	0.536698	2.04171	4.46732	0.457033	0.647647		Zfhx2os
ENSMUSG00000103369	1.31911	2.04084	1.826	1.11766	0.263712		Gm6546
ENSMUSG00000040809	1772.08	2.03918	1.27277	1.60216	0.10912	0.256848	Chil3
ENSMUSG00000051251	1.62353	2.03695	2.56206	0.795043	0.426589		Nhlh1
ENSMUSG00000031825	362.434	2.0369	0.522579	3.89778	9.70775e-05	0.00126631	Crispld2
ENSMUSG00000029659	71.8197	2.03634	0.868514	2.34463	0.019046	0.0725867	Medag
ENSMUSG00000026188	2.46477	2.0362	1.40266	1.45167	0.146593		Tmem169
ENSMUSG00000079577	15.6827	2.03579	0.694611	2.93084	0.00338048	0.0194084	Gm14692
ENSMUSG00000095126	2.40885	2.03376	1.92079	1.05881	0.289685		Trav6-7-dv9
ENSMUSG00000109940	1.9415	2.03311	2.04448	0.99444	0.320009		Gm45399
ENSMUSG00000090758	14.9975	2.03204	0.714364	2.84455	0.00444743	0.0238688	Gm17178
ENSMUSG00000014198	4.47756	2.03045	1.10996	1.8293	0.067354		Zfp385c
ENSMUSG00000113363	1.5527	2.02916	1.78341	1.1378	0.255205		AC127270.1
ENSMUSG00000107222	0.862774	2.02852	3.38347	0.599539	0.548813		Gm43198
ENSMUSG00000103569	5.05987	2.02813	1.3719	1.47834	0.139318		Gm38067
ENSMUSG00000081160	2.79444	2.02791	1.42127	1.42682	0.153631		Gm14897
ENSMUSG00000102956	0.785009	2.02783	5.33208	0.380307	0.703717		Gm37017
ENSMUSG00000061082	0.907905	2.02763	3.36084	0.603311	0.546302		Plac1
ENSMUSG00000073779	1.14097	2.02737	3.37118	0.601383	0.547585		Lrp8os2
ENSMUSG00000109002	1.50272	2.02679	2.38796	0.848752	0.39602		Gm38405
ENSMUSG00000102323	2.5966	2.02622	1.42554	1.42137	0.155209		Gm37790
ENSMUSG00000096879	0.59624	2.02536	3.19945	0.633034	0.526711		Gm4858
ENSMUSG00000025658	3.46681	2.02475	1.51858	1.33332	0.182428		Cnksr2
ENSMUSG00000105148	0.837734	2.02421	4.04943	0.499874	0.617164		Gm42700
ENSMUSG00000100490	36.8648	2.02265	0.625891	3.23164	0.00123083	0.00888231	Gm28455
ENSMUSG00000091194	2.59442	2.0223	1.27207	1.58977	0.111887		Gm19840
ENSMUSG00000074766	23.5265	2.02189	0.85481	2.36531	0.0180148	0.0694777	Ism1
ENSMUSG00000095335	112.931	2.02122	0.616828	3.2768	0.0010499	0.00789574	Igkv3-5
ENSMUSG00000040640	6.09122	2.02099	1.15474	1.75018	0.0800881		Erc2
ENSMUSG00000021539	0.48528	2.0205	5.3419	0.378237	0.705255		Lect2
ENSMUSG00000044387	1.57856	2.01747	1.35217	1.49203	0.135692		2410080I02Rik
ENSMUSG00000093264	0.489861	2.01695	5.33081	0.378358	0.705165		Gm23419
ENSMUSG00000108370	1.57519	2.01484	1.63313	1.23373	0.217305		Gm8209
ENSMUSG00000026830	4.64171	2.013	1.89335	1.06319	0.287694		Ermn
ENSMUSG00000109198	21.5829	2.01204	0.639607	3.14574	0.00165669	0.0112378	D7Bwg0826e
ENSMUSG00000107962	1.06831	2.01146	2.89607	0.694548	0.487339		Gm43980
ENSMUSG00000099842	0.775949	2.01104	5.33907	0.376665	0.706423		Gm4034
ENSMUSG00000043259	6.77377	2.01052	1.4713	1.36649	0.171785		Fam13c
ENSMUSG00000025128	1.26947	2.01001	5.12631	0.392097	0.694986		Bhlhe22
ENSMUSG00000110119	0.636344	2.00949	3.71361	0.541114	0.588429		Gm45593
ENSMUSG00000112936	1.34364	2.00712	2.73292	0.734422	0.462692		Gm33958
ENSMUSG00000102466	2.69346	2.00614	1.5697	1.27804	0.201234		Gm38200
ENSMUSG00000082313	3.02904	2.0023	1.21559	1.64719	0.09952		Gm11701
ENSMUSG00000024530	1.13252	2.00213	2.95597	0.67732	0.498203		Prelid3a
ENSMUSG00000103720	3.72655	2.00144	1.53011	1.30804	0.190861		Gm37094
ENSMUSG00000055170	65.8109	2.00121	0.601449	3.32731	0.000876882	0.00684961	Ifng
ENSMUSG00000086504	1.37238	2.00085	1.84524	1.08433	0.278218		Kif16bos
ENSMUSG00000092695	2.69226	2.00048	1.90388	1.05074	0.293378		Mir3092
ENSMUSG00000093942	0.718952	2.00014	2.7445	0.72878	0.466136		Olfr46
ENSMUSG00000113984	5.61456	1.99967	1.25122	1.59817	0.110005		AC131743.5
ENSMUSG00000048498	14.6137	1.99961	1.47134	1.35904	0.174134	0.353313	Cd300e
ENSMUSG00000097495	0.703794	1.99415	4.17355	0.477807	0.632787		Gm26651
ENSMUSG00000111355	0.435869	1.99402	5.34008	0.373408	0.708845		Gm8911
ENSMUSG00000019880	8.73402	1.99063	1.73656	1.14631	0.251667	0.450628	Rspo3
ENSMUSG00000111212	3.80412	1.99059	1.23449	1.61247	0.106859		CAAA01194877.1
ENSMUSG00000114532	0.503285	1.99049	5.27963	0.377014	0.706163		CT025547.1
ENSMUSG00000071294	2.7182	1.98897	1.39019	1.43071	0.152512		Cbx3-ps4
ENSMUSG00000027233	0.86342	1.98836	3.079	0.64578	0.518422		Patl2
ENSMUSG00000085428	1.41578	1.98814	2.0267	0.980974	0.326606		Gm14344
ENSMUSG00000113951	1.75059	1.98809	2.17216	0.915261	0.360055		Gm2001
ENSMUSG00000046245	328.437	1.98702	0.406133	4.89255	9.95397e-07	3.51678e-05	Pilra
ENSMUSG00000064353	68.8755	1.98699	0.600961	3.30635	0.000945189	0.00728966	mt-Td
ENSMUSG00000081906	0.925772	1.98565	3.39712	0.584509	0.558878		Rpl9-ps1
ENSMUSG00000075437	0.967422	1.98272	3.30911	0.59917	0.549059		Gm11681
ENSMUSG00000098177	0.655383	1.98115	4.99961	0.396261	0.691913		Gm4823
ENSMUSG00000081797	5.14186	1.98043	0.935996	2.11585	0.0343575		Gm8662
ENSMUSG00000065601	0.555595	1.9792	5.30046	0.373401	0.70885		Mir146
ENSMUSG00000025916	4.84704	1.97882	1.43296	1.38093	0.1673		Ppp1r42
ENSMUSG00000043289	2.98216	1.97711	1.29977	1.52113	0.128228		Mei4
ENSMUSG00000066684	84.1997	1.97632	0.495146	3.99138	6.56895e-05	0.000930966	Pilrb1
ENSMUSG00000094212	0.443706	1.97606	5.3442	0.369758	0.711563		Trav14-3
ENSMUSG00000096517	3.69858	1.97606	0.994977	1.98603	0.0470298		Gm6919
ENSMUSG00000106992	18.3376	1.9753	0.685989	2.87949	0.0039832	0.0220094	Gm43167
ENSMUSG00000091367	3.60343	1.97389	1.83203	1.07743	0.281287		Gm17711
ENSMUSG00000097076	2.23854	1.97347	3.45472	0.571239	0.567837		Platr7
ENSMUSG00000088359	5.50341	1.97347	1.58167	1.24772	0.212135		Gm24009
ENSMUSG00000108622	13.2591	1.97266	0.755865	2.60981	0.00905931	0.0413039	Gm36864
ENSMUSG00000029660	1.99096	1.97112	1.3622	1.44701	0.147895		Tex26
ENSMUSG00000098728	2.86813	1.96907	2.13263	0.923306	0.355848		Gm27336
ENSMUSG00000100910	2.13452	1.96834	1.87148	1.05176	0.292911		Gm29128
ENSMUSG00000076269	0.629359	1.96797	4.98929	0.394439	0.693257		Mir374b
ENSMUSG00000102930	1.22897	1.96724	3.7454	0.525243	0.599415		Gm38115
ENSMUSG00000103822	2.60382	1.96689	1.77518	1.108	0.267863		6030460B20Rik
ENSMUSG00000107350	6.21135	1.96663	1.44366	1.36226	0.173117		Gm19610
ENSMUSG00000064844	10.8869	1.96629	0.894581	2.198	0.0279494	0.0965655	Gm26202
ENSMUSG00000081136	1.35215	1.96605	1.5727	1.25011	0.211258		Gm12990
ENSMUSG00000102678	3.68395	1.96542	1.99168	0.986816	0.323733		Ighv1-21-1
ENSMUSG00000096150	3.32149	1.96389	2.70565	0.725847	0.467932		Ighv1-85
ENSMUSG00000090185	2.70546	1.9638	2.30338	0.852573	0.393896		Gm15523
ENSMUSG00000113792	4.13888	1.96359	1.31119	1.49756	0.134248		Gm10933
ENSMUSG00000026697	4.13344	1.96329	1.58586	1.238	0.215718		Myoc
ENSMUSG00000089937	7.96378	1.9632	0.84885	2.31277	0.020735	0.0772426	Gm7281
ENSMUSG00000111635	10.0063	1.95897	0.69136	2.8335	0.00460417	0.0244801	AC126672.1
ENSMUSG00000065360	1.65459	1.9565	1.92161	1.01816	0.308604		Gm24412
ENSMUSG00000038193	17.4229	1.95517	1.07318	1.82185	0.0684782	0.185449	Hand2
ENSMUSG00000073274	4.75454	1.95412	1.22412	1.59634	0.110413		Gm14636
ENSMUSG00000107379	3.96835	1.95407	1.18982	1.64232	0.100523		Gm43126
ENSMUSG00000091230	2.07238	1.95348	1.92011	1.01738	0.308972		Gm6970
ENSMUSG00000033777	319.655	1.95191	0.422393	4.62107	3.81767e-06	0.000102887	Tlr13
ENSMUSG00000109355	0.91805	1.9513	2.18671	0.892347	0.372207		Gm4880
ENSMUSG00000102371	1.11833	1.95105	2.80107	0.696539	0.486092		Olfr258-ps1
ENSMUSG00000097775	0.696316	1.95095	3.36265	0.580184	0.561791		4931440J10Rik
ENSMUSG00000027525	3.61592	1.95086	1.27765	1.52691	0.126783		Phactr3
ENSMUSG00000084984	2.43631	1.94902	1.88147	1.0359	0.300249		Far1os
ENSMUSG00000100141	4.31448	1.94745	1.23933	1.57138	0.116095		Gm6445
ENSMUSG00000095954	0.616121	1.94723	5.34434	0.364354	0.715594		Gm3183
ENSMUSG00000097798	0.885675	1.9471	3.35412	0.580509	0.561571		Gm26898
ENSMUSG00000062694	2.44335	1.94695	2.83152	0.687598	0.491706		Cav3
ENSMUSG00000111173	1.56778	1.94679	1.75347	1.11025	0.266891		AC153561.1
ENSMUSG00000076598	184.901	1.94614	0.770899	2.52451	0.011586	0.0499429	Igkv3-7
ENSMUSG00000045502	392.088	1.94413	0.905772	2.14638	0.031843	0.106216	Hcar2
ENSMUSG00000085823	20.5085	1.94328	0.876919	2.21603	0.0266892	0.0931583	Gm13012
ENSMUSG00000112196	1.95052	1.94327	1.62458	1.19616	0.231633		Gm8274
ENSMUSG00000021680	5.96032	1.94273	1.55302	1.25093	0.210958		Crhbp
ENSMUSG00000023263	1.17219	1.94233	5.3464	0.363296	0.716384		9530002B09Rik
ENSMUSG00000112766	2.60386	1.94232	3.09076	0.628429	0.529723		Gm40645
ENSMUSG00000085066	2.82994	1.93954	1.55668	1.24595	0.212784		Gm4989
ENSMUSG00000035686	5.38098	1.939	1.64764	1.17683	0.239262		Thrsp
ENSMUSG00000106286	1.20608	1.93855	2.29903	0.843205	0.399114		Gm43424
ENSMUSG00000058897	2.56758	1.93837	1.72136	1.12607	0.260136		Col25a1
ENSMUSG00000058463	15.5256	1.93689	0.577912	3.35153	0.000803659	0.0064078	Gm5471
ENSMUSG00000093955	12.9659	1.93656	1.49132	1.29856	0.194095	0.379685	Ighv1-34
ENSMUSG00000085333	5.68139	1.93568	2.08417	0.928749	0.353019		1700030A11Rik
ENSMUSG00000102184	2.44595	1.93385	1.72187	1.12311	0.261391		Gm37192
ENSMUSG00000109125	1.30178	1.9331	2.68723	0.719365	0.471916		Gm45159
ENSMUSG00000065400	0.993608	1.9325	2.83771	0.681007	0.495867		Mir200a
ENSMUSG00000110167	1.18611	1.93168	3.38406	0.570816	0.568124		Gm45532
ENSMUSG00000071847	21.064	1.93113	0.724153	2.66675	0.00765895	0.0364397	Apcdd1
ENSMUSG00000099027	1.69074	1.93025	3.30744	0.583607	0.559484		Gm27176
ENSMUSG00000078783	65.4878	1.92991	0.847284	2.27776	0.0227409	0.0828023	Gm9733
ENSMUSG00000101279	57.5121	1.92809	0.498491	3.86786	0.000109795	0.00139756	Gm18342
ENSMUSG00000084185	0.567513	1.925	3.70431	0.519665	0.603297		Rplp1-ps1
ENSMUSG00000064994	0.965752	1.92321	3.31252	0.580588	0.561518		Gm22422
ENSMUSG00000097030	0.581786	1.92248	4.25725	0.451578	0.651573		Gm26693
ENSMUSG00000086753	11.2161	1.92164	0.865199	2.22103	0.0263486	0.0924212	Gm15751
ENSMUSG00000111693	1.57556	1.92157	1.75686	1.09375	0.274063		AC112956.1
ENSMUSG00000044485	82.7373	1.92092	0.521802	3.68132	0.000232031	0.00246411	Klk1b11
ENSMUSG00000109580	2.51742	1.92051	1.56419	1.2278	0.219522		Gm8268
ENSMUSG00000040340	0.693086	1.92013	4.2373	0.453149	0.650442		Tex45
ENSMUSG00000104660	1.99009	1.92001	1.325	1.44907	0.147317		Gm43601
ENSMUSG00000028825	0.857175	1.91968	2.51257	0.764029	0.44485		Rhd
ENSMUSG00000102333	1.55728	1.91808	3.41585	0.561523	0.574441		Gm37235
ENSMUSG00000022296	3.0733	1.91612	1.27606	1.50159	0.133203		Baalc
ENSMUSG00000090128	0.821945	1.91477	4.88856	0.391683	0.695292		Gm16038
ENSMUSG00000065503	0.783544	1.91365	4.87059	0.3929	0.694393		Mir351
ENSMUSG00000085657	0.819724	1.91334	2.65925	0.719501	0.471832		Gm15984
ENSMUSG00000089849	0.895666	1.91277	5.34865	0.357618	0.72063		Runx2os2
ENSMUSG00000105810	2.03073	1.91268	1.51399	1.26334	0.206467		Gm43435
ENSMUSG00000099267	3.63691	1.9124	1.64258	1.16427	0.244316		Mir6955
ENSMUSG00000084526	1.29011	1.91219	2.77014	0.690287	0.490014		n-R5s192
ENSMUSG00000076666	6.46739	1.91211	1.43497	1.33251	0.182692		Ighv14-4
ENSMUSG00000108060	2.52857	1.91204	1.85993	1.02802	0.303943		4921529L05Rik
ENSMUSG00000107568	4.12792	1.91168	1.35973	1.40592	0.159748		Gm18840
ENSMUSG00000026691	3.67349	1.91057	2.97274	0.642698	0.52042		Fmo3
ENSMUSG00000090565	3.03976	1.91014	1.3301	1.43608	0.150978		4930405O22Rik
ENSMUSG00000084153	0.660936	1.91006	4.35346	0.438745	0.660847		Gm12186
ENSMUSG00000090860	10.8153	1.90921	1.16392	1.64032	0.100938	0.244043	Gm17134
ENSMUSG00000101574	1.70509	1.90902	3.33938	0.57167	0.567546		1700112H15Rik
ENSMUSG00000092250	5.60128	1.90776	2.63883	0.722956	0.469707		Gm20467
ENSMUSG00000051747	5.61517	1.9064	1.25155	1.52323	0.127701		Ttn
ENSMUSG00000105457	7.03576	1.90436	0.951199	2.00206	0.0452779		Gm43200
ENSMUSG00000070837	0.82295	1.9036	2.70912	0.702663	0.482266		Aurkc
ENSMUSG00000030491	46.436	1.90216	0.594921	3.19734	0.00138702	0.00981984	Tdrd12
ENSMUSG00000099673	2.24718	1.90135	2.11214	0.900199	0.368014		Scgb2b30
ENSMUSG00000082461	13.3895	1.89979	0.592074	3.20869	0.00133339	0.00950244	Gm8844
ENSMUSG00000064927	16.6272	1.89934	0.780864	2.43236	0.015001	0.0602842	Gm22043
ENSMUSG00000083390	4.50194	1.89777	1.00849	1.88181	0.0598623		Gm13121
ENSMUSG00000104484	0.517647	1.8977	5.34515	0.355031	0.722566		Gm33142
ENSMUSG00000108657	1.41157	1.89718	2.10491	0.901311	0.367423		Gm35611
ENSMUSG00000100561	2.23772	1.89605	1.57962	1.20032	0.230015		Gm7516
ENSMUSG00000052749	112.946	1.89514	0.763579	2.48192	0.0130675	0.0547135	Trim30b
ENSMUSG00000030173	148.195	1.89421	0.599448	3.15993	0.00157809	0.0108183	Klra5
ENSMUSG00000096515	37.9372	1.89246	1.21918	1.55224	0.120604	0.275123	Igkv14-100
ENSMUSG00000086791	14.8358	1.89165	0.962134	1.9661	0.0492871	0.146274	Gm12147
ENSMUSG00000112646	15.2016	1.8906	0.582724	3.24441	0.00117695	0.0085833	Gm5654
ENSMUSG00000006649	90.0528	1.88885	0.640209	2.95037	0.00317391	0.0184771	Nphs1
ENSMUSG00000032443	6.09761	1.88838	1.09025	1.73206	0.0832624		Zcwpw2
ENSMUSG00000039194	1.30629	1.88829	1.61625	1.16831	0.242681		Rlbp1
ENSMUSG00000043943	15.726	1.88786	1.09091	1.73054	0.0835341	0.213856	Naalad2
ENSMUSG00000088545	0.631043	1.88608	5.28805	0.356668	0.721341		Gm25982
ENSMUSG00000113643	3.08871	1.88495	1.29983	1.45015	0.147016		Gm40598
ENSMUSG00000109565	0.512752	1.88481	4.30892	0.437421	0.661806		Gm6579
ENSMUSG00000089728	1.42694	1.88463	2.59534	0.726159	0.467741		Clec2f
ENSMUSG00000109764	0.635473	1.88459	4.97785	0.378596	0.704988		Klkb1
ENSMUSG00000112637	0.694061	1.88458	4.19722	0.449008	0.653426		AC124346.2
ENSMUSG00000065315	0.769691	1.88437	4.07096	0.462881	0.643449		Gm26064
ENSMUSG00000036446	234.405	1.88413	0.935513	2.01401	0.0440089	0.134714	Lum
ENSMUSG00000081041	0.514331	1.88311	5.20794	0.361584	0.717663		Nlk-ps1
ENSMUSG00000030160	2.97561	1.88223	1.39735	1.347	0.177981		Tmem52b
ENSMUSG00000114778	3.30263	1.88126	1.25315	1.50123	0.133296		AC158511.1
ENSMUSG00000115570	1.23559	1.87919	3.70141	0.507697	0.611666		AC123665.3
ENSMUSG00000073682	2.0199	1.87893	2.27676	0.825264	0.409222		Gm10563
ENSMUSG00000115137	0.475686	1.87846	5.29218	0.354951	0.722626		AC107645.1
ENSMUSG00000024190	5934.25	1.87772	0.557449	3.36842	0.000756004	0.00610574	Dusp1
ENSMUSG00000105083	1.01798	1.87693	4.67159	0.401776	0.687849		Gm42699
ENSMUSG00000091933	1.0944	1.87646	2.41672	0.776449	0.437484		Gm8857
ENSMUSG00000098158	0.643239	1.87579	4.18615	0.448095	0.654085		Gm4804
ENSMUSG00000025380	3.74316	1.87548	1.05992	1.76945	0.0768183		Fscn2
ENSMUSG00000061780	50.0184	1.8742	1.69794	1.1038	0.269678	0.471271	Cfd
ENSMUSG00000062073	10.7241	1.87314	0.744485	2.51602	0.0118688	0.0509531	Gm10109
ENSMUSG00000081005	4.75382	1.86992	1.13334	1.64991	0.0989614		Gm13198
ENSMUSG00000087575	1.73905	1.86963	1.62545	1.15023	0.250051		Gm12976
ENSMUSG00000065147	69.107	1.8695	0.637977	2.93036	0.0033857	0.0194185	Snora31
ENSMUSG00000103955	1.01644	1.86943	3.328	0.561729	0.5743		Gm37270
ENSMUSG00000104626	0.553527	1.86731	5.33913	0.34974	0.726534		Gm42675
ENSMUSG00000049723	219.075	1.86723	0.568825	3.28261	0.00102852	0.00777317	Mmp12
ENSMUSG00000102272	2.28449	1.86611	1.80017	1.03663	0.299909		Gm7512
ENSMUSG00000101402	0.924339	1.86603	4.83186	0.386193	0.699354		Gm28673
ENSMUSG00000010086	9.74645	1.86597	0.855836	2.18029	0.0292357	0.0996597	Rnf112
ENSMUSG00000037130	0.612101	1.86518	4.25218	0.438641	0.660922		H2-M10.6
ENSMUSG00000082596	15.5062	1.86455	0.718696	2.59435	0.00947708	0.0428569	Gm14227
ENSMUSG00000067149	8481.94	1.86357	0.738924	2.522	0.0116689	0.0502245	Jchain
ENSMUSG00000106093	1.45801	1.86342	2.53694	0.734513	0.462636		Gm42722
ENSMUSG00000096715	110.457	1.86336	1.19507	1.55921	0.118947	0.272492	Igkv3-4
ENSMUSG00000031073	1.4349	1.86308	2.02053	0.922077	0.356489		Fgf15
ENSMUSG00000100536	1.8375	1.86216	2.74077	0.679429	0.496866		Gm28873
ENSMUSG00000039904	0.720648	1.86199	4.84218	0.384535	0.700582		Gpr37
ENSMUSG00000108777	1.28232	1.86191	2.06245	0.902767	0.36665		Gm45081
ENSMUSG00000063816	7.40612	1.86176	0.770728	2.41559	0.0157098		Gm4987
ENSMUSG00000081631	4.88115	1.86168	0.79508	2.3415	0.0192062		Gm12005
ENSMUSG00000108874	0.487869	1.85896	5.3381	0.348243	0.727657		Gm9711
ENSMUSG00000084328	14.1241	1.85881	0.609822	3.04813	0.00230273	0.0144986	Gm14046
ENSMUSG00000113349	1.85504	1.85754	1.98191	0.937246	0.348632		AC132336.1
ENSMUSG00000085898	0.87361	1.85475	2.09779	0.884146	0.376618		Gm6689
ENSMUSG00000081553	0.978094	1.85419	1.77341	1.04555	0.29577		Ccdc50-ps
ENSMUSG00000031289	24.9714	1.85262	2.95467	0.627015	0.53065	0.714655	Il13ra2
ENSMUSG00000022875	5.59312	1.85259	1.90419	0.972903	0.330602		Kng1
ENSMUSG00000112317	3.78172	1.85136	1.55895	1.18757	0.235004		AC153526.2
ENSMUSG00000103216	0.923884	1.84972	5.34116	0.346314	0.729107		Gm37248
ENSMUSG00000113605	0.685116	1.84963	3.62533	0.510195	0.609915		4930425K24Rik
ENSMUSG00000073610	0.490396	1.84937	5.33096	0.34691	0.728659		Gm10549
ENSMUSG00000101214	0.449885	1.84884	5.32854	0.346969	0.728615		Gm28403
ENSMUSG00000111362	0.458825	1.84878	5.34459	0.345916	0.729406		AC153955.3
ENSMUSG00000078640	1.81246	1.84764	4.88841	0.377964	0.705457		Gm11627
ENSMUSG00000022441	0.557015	1.84678	5.29423	0.348828	0.727218		Efcab6
ENSMUSG00000094502	21.0319	1.84555	1.34528	1.37187	0.170103	0.348199	Ighv1-69
ENSMUSG00000085465	0.834286	1.84508	5.33429	0.345891	0.729425		Gm15347
ENSMUSG00000094665	0.987915	1.84316	2.45671	0.750258	0.453099		Gm24873
ENSMUSG00000086554	6.61024	1.8431	1.20447	1.53022	0.125962		9530034E10Rik
ENSMUSG00000094546	51.9029	1.84181	0.976264	1.88659	0.0592154	0.167226	Ighv1-26
ENSMUSG00000087029	0.997981	1.84072	2.77024	0.664462	0.506395		Gm14133
ENSMUSG00000064778	4.25046	1.8397	1.48366	1.23997	0.214986		Snord59a
ENSMUSG00000115618	1.33469	1.83933	1.98409	0.927038	0.353907		CT009550.3
ENSMUSG00000090812	5.08626	1.83918	1.12141	1.64007	0.100991		Samd15
ENSMUSG00000064387	4.3892	1.83874	1.10712	1.66083	0.0967469		Snora73a
ENSMUSG00000112971	5.23624	1.83756	1.0699	1.71751	0.0858868		Gm33682
ENSMUSG00000092009	0.578445	1.83537	5.17235	0.354842	0.722708		Myh15
ENSMUSG00000113705	2.93347	1.83505	2.23839	0.819808	0.412325		AC238676.3
ENSMUSG00000102196	6.47264	1.83469	1.95282	0.93951	0.347469		Gm38171
ENSMUSG00000076564	286.773	1.83456	0.915027	2.00493	0.0449704	0.136855	Igkv12-46
ENSMUSG00000115299	2.56026	1.83378	1.33341	1.37525	0.169054		AC154738.5
ENSMUSG00000083054	0.620174	1.83027	3.22968	0.566705	0.570915		Gm12986
ENSMUSG00000045952	0.839879	1.8291	3.54756	0.515593	0.606138		Gm5548
ENSMUSG00000102147	0.685552	1.82778	4.13676	0.441838	0.658607		Gm38055
ENSMUSG00000105077	24.5137	1.82736	0.538117	3.39584	0.000684172	0.00566282	Gm4859
ENSMUSG00000102246	3.6892	1.82685	1.32356	1.38026	0.167507		9430037O13Rik
ENSMUSG00000113581	10.3174	1.82595	1.0681	1.70953	0.0873535	0.220835	AL591207.1
ENSMUSG00000048096	13.3141	1.82549	1.65556	1.10264	0.270182	0.471987	Lmod1
ENSMUSG00000083502	6.89405	1.82315	1.21797	1.49687	0.134426		Gm14861
ENSMUSG00000095007	130.423	1.82273	0.840913	2.16756	0.0301918	0.102019	Igkv12-41
ENSMUSG00000094945	1.67744	1.82195	3.81985	0.476968	0.633385		Rhox4a2
ENSMUSG00000087283	0.960835	1.82194	4.03277	0.451784	0.651424		Gm13580
ENSMUSG00000048480	6.10362	1.82051	1.78861	1.01784	0.308755		Cxcr1
ENSMUSG00000080791	0.693028	1.81943	3.47639	0.523368	0.600719		Akirin1-ps
ENSMUSG00000083580	8.60224	1.8193	0.897004	2.02819	0.0425406	0.13142	Rpsa-ps3
ENSMUSG00000055312	0.778534	1.81916	5.01292	0.362895	0.716683		Them7
ENSMUSG00000103649	1.80131	1.81904	3.49229	0.520873	0.602455		Gm37768
ENSMUSG00000013091	10.1291	1.81751	1.73018	1.05048	0.2935	0.498016	Tmem190
ENSMUSG00000028177	3.47982	1.81712	1.33218	1.36401	0.172563		1810013D15Rik
ENSMUSG00000087121	4.01833	1.81688	1.05957	1.71474	0.0863935		Gm7847
ENSMUSG00000106609	69.2323	1.8153	1.51022	1.20201	0.229361	0.423307	Gm43181
ENSMUSG00000097903	4.20226	1.81482	1.38528	1.31008	0.19017		Gm26679
ENSMUSG00000024679	680.531	1.81461	0.543814	3.33682	0.000847433	0.00667351	Ms4a6d
ENSMUSG00000108401	3.04735	1.8142	1.29235	1.4038	0.160377		Rpl19-ps10
ENSMUSG00000027107	1.55985	1.8128	1.80546	1.00407	0.315347		Chrna1
ENSMUSG00000114114	1.60431	1.8127	1.42046	1.27614	0.201907		AC154368.2
ENSMUSG00000050035	2.90225	1.81215	1.37189	1.32091	0.18653		Fhl4
ENSMUSG00000076731	46.472	1.81135	0.99531	1.81989	0.0687765	0.186131	Ighv8-12
ENSMUSG00000056632	43.2939	1.81049	1.07882	1.67821	0.093307	0.231009	Dsg3
ENSMUSG00000105705	0.518387	1.80948	4.37123	0.413952	0.678909		AC174780.1
ENSMUSG00000095257	5.65487	1.80912	1.28067	1.41264	0.157761		Scgb1b3
ENSMUSG00000090026	1.01563	1.80897	3.03839	0.595372	0.551595		Gm15996
ENSMUSG00000030148	210.555	1.80878	0.35359	5.11546	3.12972e-07	1.42563e-05	Clec4a2
ENSMUSG00000107082	1.23278	1.80661	2.44177	0.739876	0.459375		Gm36378
ENSMUSG00000050366	1.0702	1.80502	5.34863	0.337473	0.73576		Olfr524
ENSMUSG00000114906	0.778865	1.80481	2.1219	0.850564	0.395012		AC165092.3
ENSMUSG00000107411	7.00689	1.80444	1.15576	1.56126	0.118462		Gm19040
ENSMUSG00000065468	0.90103	1.80397	2.11214	0.854095	0.393052		Mir26b
ENSMUSG00000093327	21.1627	1.80307	0.783634	2.30091	0.0213966	0.0790474	Mir5107
ENSMUSG00000115630	2.14934	1.80248	1.58897	1.13437	0.256641		AC125405.1
ENSMUSG00000020264	16.1061	1.79999	0.843834	2.1331	0.0329162	0.108654	Slc36a2
ENSMUSG00000115783	1.54042	1.79921	1.83672	0.979577	0.327295		AC161763.1
ENSMUSG00000035594	2.26943	1.79901	1.88493	0.954413	0.339874		Chrna5
ENSMUSG00000095771	305.233	1.79849	0.786046	2.28802	0.0221362	0.0812066	Igkv14-111
ENSMUSG00000092540	26.2821	1.79787	0.609137	2.9515	0.00316236	0.0184367	Gm8738
ENSMUSG00000109482	1.26401	1.79728	2.74733	0.654189	0.51299		Gm4756
ENSMUSG00000112799	4.66355	1.797	0.942615	1.90639	0.0565991		AC155293.1
ENSMUSG00000115148	8.67798	1.79695	0.883843	2.03311	0.0420418	0.130201	AC107711.1
ENSMUSG00000095489	0.83401	1.79688	3.33843	0.538243	0.59041		Gm25737
ENSMUSG00000102908	5.68536	1.7957	0.89702	2.00185	0.0453005		Gm7558
ENSMUSG00000109313	1.47282	1.79535	1.49998	1.19691	0.23134		Gm44693
ENSMUSG00000084211	0.6967	1.79496	5.33628	0.33637	0.736592		Gm11949
ENSMUSG00000091419	1.49347	1.79373	1.38103	1.29884	0.194		Gm17450
ENSMUSG00000080866	6.30837	1.79342	0.83284	2.15338	0.0312888		Gm5687
ENSMUSG00000095612	82.6194	1.7923	0.957521	1.87181	0.0612326	0.171183	Ighv5-4
ENSMUSG00000111424	4.05337	1.7918	1.39042	1.28867	0.197511		AC159308.2
ENSMUSG00000098206	4.2023	1.79105	1.34637	1.33028	0.183425		A430106G13Rik
ENSMUSG00000103499	1.36805	1.79073	2.22031	0.80652	0.419943		Gm6558
ENSMUSG00000076577	592.323	1.79028	0.906013	1.97599	0.0481557	0.143642	Igkv8-30
ENSMUSG00000106518	2.25792	1.78997	2.18336	0.819823	0.412317		Gm42759
ENSMUSG00000068522	4.27941	1.78951	2.06751	0.865541	0.386742		Aard
ENSMUSG00000091422	0.699706	1.78937	3.5857	0.499029	0.617759		Gm6455
ENSMUSG00000085884	0.473827	1.78917	5.33794	0.33518	0.73749		Gm15342
ENSMUSG00000111967	2.37806	1.78896	1.16842	1.53109	0.125746		Gm3678
ENSMUSG00000076556	124.721	1.78887	0.748261	2.39071	0.0168161	0.0658837	Igkv4-57
ENSMUSG00000056476	68.9964	1.78865	1.01632	1.75992	0.0784213	0.203873	Med12l
ENSMUSG00000103182	0.764399	1.787	2.64662	0.675198	0.49955		Gm37091
ENSMUSG00000088378	1.54103	1.7859	3.19072	0.559718	0.575672		Gm25184
ENSMUSG00000048503	2.93915	1.78576	2.35316	0.758879	0.447925		Tmem136
ENSMUSG00000098328	0.845529	1.78558	3.02207	0.590847	0.554623		Gm27271
ENSMUSG00000085810	1.11283	1.78518	3.60067	0.495789	0.620043		Gm16325
ENSMUSG00000084497	29.5321	1.78312	0.560611	3.18068	0.00146931	0.010259	Gm22107
ENSMUSG00000103869	2.99951	1.78277	1.39546	1.27755	0.201408		Gm37420
ENSMUSG00000084060	0.926327	1.78266	3.13866	0.567968	0.570057		Gm16412
ENSMUSG00000113842	1.14875	1.7825	2.56377	0.695265	0.486889		AC122828.2
ENSMUSG00000063779	15.9078	1.782	1.85255	0.961918	0.336091	0.543546	Chil4
ENSMUSG00000112755	0.553041	1.78163	5.33414	0.334004	0.738376		Gm46190
ENSMUSG00000112937	0.437763	1.78044	5.34059	0.333378	0.738849		Gm17746
ENSMUSG00000086561	0.610581	1.78025	5.00596	0.355627	0.72212		Gm15540
ENSMUSG00000100819	6.23389	1.77857	0.724102	2.45625	0.0140396		Gm2693
ENSMUSG00000061272	19.7797	1.77829	0.635307	2.7991	0.00512456	0.0265746	Gm14173
ENSMUSG00000088712	3.9315	1.77812	1.38635	1.28259	0.199635		Gm22728
ENSMUSG00000078161	20.0421	1.7781	0.663709	2.67904	0.00738334	0.0353916	Erich3
ENSMUSG00000097725	1.29977	1.77767	3.3592	0.529195	0.59667		4930593A02Rik
ENSMUSG00000104646	13.4979	1.77748	0.741228	2.39802	0.0164839	0.0649131	Gm9173
ENSMUSG00000078746	0.660006	1.77734	5.3444	0.332561	0.739466		Fam205a4
ENSMUSG00000081444	8.14677	1.77575	0.695688	2.55251	0.010695	0.0469112	Gm15803
ENSMUSG00000094433	425.681	1.7735	0.961281	1.84494	0.0650466	0.178722	Igkv5-43
ENSMUSG00000009941	1.44514	1.77335	1.86936	0.948644	0.342802		Nxf2
ENSMUSG00000066363	260.204	1.77251	0.616507	2.87509	0.00403919	0.0222634	Serpina3f
ENSMUSG00000045903	2.24757	1.7723	1.49437	1.18598	0.235629		Npas4
ENSMUSG00000110235	4.02639	1.77223	1.33646	1.32606	0.184819		Gm5086
ENSMUSG00000017211	1.49159	1.77152	1.85408	0.95547	0.33934		Gsdma2
ENSMUSG00000076655	37.4381	1.77121	0.91702	1.93149	0.0534226	0.155117	Ighv4-1
ENSMUSG00000083412	0.672536	1.77112	5.34374	0.331439	0.740313		Gm12268
ENSMUSG00000078757	2.9004	1.77053	1.8268	0.969194	0.332449		Scgb1b29
ENSMUSG00000096140	10.6387	1.77052	1.1377	1.55622	0.119655	0.273642	Ankrd66
ENSMUSG00000062960	46.2466	1.77051	0.927541	1.90882	0.0562855	0.161137	Kdr
ENSMUSG00000093668	0.91494	1.7697	2.96659	0.596544	0.550812		Pou5f2
ENSMUSG00000089080	0.630263	1.76933	5.34939	0.330754	0.740831		Gm24003
ENSMUSG00000049719	2.21586	1.76924	2.58203	0.68521	0.493211		Prss46
ENSMUSG00000104155	1.19017	1.76898	5.35691	0.330225	0.74123		Gm38103
ENSMUSG00000028238	3.82415	1.76813	1.305	1.35489	0.175454		Atp6v0d2
ENSMUSG00000031189	0.821844	1.76737	5.34683	0.330546	0.740987		Aff2
ENSMUSG00000107836	0.907108	1.76548	2.19525	0.804226	0.421267		Gm5315
ENSMUSG00000065878	6.21938	1.76534	1.11247	1.58686	0.112543		Snord34
ENSMUSG00000109998	1.30198	1.7652	1.93227	0.913538	0.36096		Gm45437
ENSMUSG00000092225	0.888023	1.76431	3.0779	0.573218	0.566497		Gm2381
ENSMUSG00000090397	5.97271	1.76322	1.29973	1.35661	0.174907		Gm17096
ENSMUSG00000113439	0.907008	1.76283	2.75795	0.639183	0.522704		AC165157.2
ENSMUSG00000083268	0.531648	1.76163	5.30294	0.332199	0.739739		Gm11511
ENSMUSG00000074763	0.666866	1.7603	5.02349	0.350414	0.726028		Macrod2os2
ENSMUSG00000089929	63.3233	1.75942	0.604389	2.91108	0.00360183	0.0203176	Bcl2a1b
ENSMUSG00000087159	5.40801	1.7586	0.963221	1.82575	0.0678883		Gm15246
ENSMUSG00000094262	23.4601	1.75755	1.49088	1.17887	0.238452	0.43455	Igkv4-62
ENSMUSG00000064495	2.33331	1.75746	1.72698	1.01765	0.308844		Gm24313
ENSMUSG00000113256	1.13928	1.75727	3.29901	0.532665	0.594266		CT033774.2
ENSMUSG00000098105	4.64077	1.75713	1.0378	1.69314	0.0904292		Gm8825
ENSMUSG00000110964	6.6394	1.75668	0.770734	2.27923	0.0226536		Gm20953
ENSMUSG00000029816	85.7875	1.75659	0.743687	2.36201	0.0181763	0.0699386	Gpnmb
ENSMUSG00000082289	21.6945	1.75609	0.441825	3.97463	7.04899e-05	0.000978201	Gm15596
ENSMUSG00000076493	2.72175	1.75586	1.78331	0.98461	0.324816		Trbj2-2
ENSMUSG00000098799	13.9874	1.75584	0.739429	2.37458	0.0175688	0.068165	Trgj4
ENSMUSG00000094930	256.526	1.75509	1.09969	1.59598	0.110494	0.259207	Igkv6-25
ENSMUSG00000089542	22.6931	1.75322	0.705278	2.48585	0.0129242	0.0542836	Gm25835
ENSMUSG00000043295	0.911868	1.75302	2.53665	0.691075	0.489519		Gm16373
ENSMUSG00000020323	3.66017	1.75224	1.53856	1.13888	0.254753		Prss57
ENSMUSG00000079330	4.28121	1.75114	2.22881	0.785683	0.432053		Lemd1
ENSMUSG00000087354	2.76404	1.75111	1.32653	1.32006	0.186814		4930404I05Rik
ENSMUSG00000104277	2.10733	1.74745	1.69328	1.03199	0.302078		Gm38299
ENSMUSG00000079852	4.27439	1.74712	1.77583	0.983835	0.325197		Klra4
ENSMUSG00000023918	4.58463	1.7471	1.9035	0.917835	0.358705		Adgrf4
ENSMUSG00000080772	1.36468	1.74651	1.90039	0.91903	0.35808		Gm12543
ENSMUSG00000105171	7.14272	1.74613	0.707181	2.46914	0.0135439		Gm5288
ENSMUSG00000095799	0.766835	1.7458	4.95421	0.352388	0.724547		Gm8332
ENSMUSG00000112935	0.390443	1.74482	5.32791	0.327487	0.743299		Gm40983
ENSMUSG00000101325	1.83011	1.74473	2.98782	0.583947	0.559256		Scgb2b4-ps
ENSMUSG00000092186	2.06113	1.74468	1.3296	1.31219	0.189457		Gm5967
ENSMUSG00000095068	0.778889	1.74447	4.1397	0.421402	0.673462		Gm26189
ENSMUSG00000113592	0.464381	1.74415	5.31656	0.32806	0.742866		Gm7093
ENSMUSG00000083693	19.1201	1.7439	0.536821	3.24858	0.00115983	0.00850501	Gm11971
ENSMUSG00000107811	1.62074	1.74363	2.61459	0.666885	0.504845		Gm44000
ENSMUSG00000099435	1.37435	1.74348	2.49666	0.698324	0.484975		1700065I16Rik
ENSMUSG00000096729	3.94945	1.74306	0.932064	1.8701	0.0614695		Gm13695
ENSMUSG00000103314	12.7947	1.74275	0.612988	2.84305	0.00446844	0.0239495	Gm38358
ENSMUSG00000053101	94.9861	1.74216	0.551933	3.15647	0.0015969	0.0109178	Gpr141
ENSMUSG00000094198	5.16976	1.7416	2.16159	0.805704	0.420414		Ighv1-50
ENSMUSG00000113149	4.81376	1.74148	2.00232	0.869731	0.384448		AC099934.3
ENSMUSG00000006179	102.891	1.74085	0.483204	3.60272	0.00031491	0.00313452	Prss16
ENSMUSG00000095805	3.66302	1.74062	1.35577	1.28386	0.199192		Gm22092
ENSMUSG00000046196	0.499559	1.74056	5.34746	0.325494	0.744807		Ttc39d
ENSMUSG00000081314	4.33745	1.74041	0.951885	1.82839	0.0674917		Gm14132
ENSMUSG00000076671	14.6791	1.7399	1.62753	1.06904	0.28505	0.48843	Ighv13-2
ENSMUSG00000089048	1.80977	1.73867	1.39481	1.24653	0.212571		Gm26167
ENSMUSG00000022126	1909.27	1.73862	0.915311	1.89949	0.0575004	0.163841	Acod1
ENSMUSG00000004698	66.9672	1.73641	0.526542	3.29777	0.000974572	0.00744689	Hdac9
ENSMUSG00000086360	2.95854	1.7355	1.58189	1.09711	0.272595		Gm16214
ENSMUSG00000033633	0.751483	1.73494	3.48246	0.498195	0.618346		Clec18a
ENSMUSG00000111744	1.00195	1.7348	2.24914	0.771315	0.44052		Gm7780
ENSMUSG00000112900	0.786484	1.73421	4.84562	0.357892	0.720424		AC140299.2
ENSMUSG00000106818	1.3437	1.7337	2.20886	0.784883	0.432522		Gm43790
ENSMUSG00000027833	3.03463	1.73362	1.33996	1.29379	0.195738		Shox2
ENSMUSG00000003477	35.6121	1.73354	1.18762	1.45968	0.144378	0.312291	Inmt
ENSMUSG00000087238	0.650013	1.73303	3.49161	0.496342	0.619653		Gm12865
ENSMUSG00000109089	1.36396	1.73248	1.82796	0.94777	0.343246		4833411C07Rik
ENSMUSG00000102364	39.9851	1.73198	1.12442	1.54034	0.123478	0.279921	Ighv8-5
ENSMUSG00000080408	0.753782	1.73174	2.89847	0.597468	0.550195		Gm23654
ENSMUSG00000085923	0.431944	1.73152	5.34517	0.323942	0.745982		Gm12781
ENSMUSG00000021835	165.706	1.73139	0.679878	2.54662	0.0108773	0.0475022	Bmp4
ENSMUSG00000087455	3.53739	1.72986	1.63585	1.05747	0.290298		5330411J11Rik
ENSMUSG00000084215	2032.74	1.72855	0.376224	4.59446	4.3388e-06	0.00011312	Gm11814
ENSMUSG00000052581	0.872258	1.7278	5.33011	0.32416	0.745817		Lrrtm4
ENSMUSG00000081429	1.03368	1.72756	1.97324	0.875493	0.381305		Rps27-ps1
ENSMUSG00000084024	2.36767	1.72719	1.33934	1.28958	0.197196		Gm15937
ENSMUSG00000108991	1.4149	1.72622	3.57244	0.483204	0.628951		Gm45807
ENSMUSG00000087674	1.6828	1.72571	1.45049	1.18974	0.234147		4930447M23Rik
ENSMUSG00000034777	1.14223	1.72571	4.37411	0.394527	0.693192		Vax2
ENSMUSG00000081875	3.11184	1.72559	1.15343	1.49605	0.13464		Gm15223
ENSMUSG00000100337	18.375	1.72522	0.744805	2.31634	0.0205397	0.0767724	Gm5066
ENSMUSG00000107561	1.42519	1.72501	2.13348	0.808546	0.418776		Gm44264
ENSMUSG00000062074	1.80332	1.72476	2.03669	0.846846	0.397081		Wisp3
ENSMUSG00000113741	11.2594	1.72457	0.792111	2.17718	0.0294673	0.100263	AC159635.2
ENSMUSG00000081524	9.4824	1.72383	0.823238	2.09397	0.0362629	0.116659	Gm11658
ENSMUSG00000090166	0.773267	1.7238	5.34835	0.322305	0.747222		Ear10
ENSMUSG00000085731	1.41347	1.72368	2.11621	0.814511	0.415352		Gm16229
ENSMUSG00000099568	1.11362	1.72254	1.66483	1.03466	0.300827		Gm28513
ENSMUSG00000102943	0.676498	1.72167	4.14802	0.415058	0.678099		Gm37550
ENSMUSG00000100615	98.3724	1.72115	0.342108	5.03102	4.87871e-07	1.98292e-05	Gm5511
ENSMUSG00000084280	0.588808	1.72069	3.55045	0.48464	0.627932		Gm11972
ENSMUSG00000020722	0.461109	1.72004	5.34568	0.321762	0.747633		Cacng1
ENSMUSG00000112666	2.52643	1.71978	1.19189	1.4429	0.149048		AC132384.12
ENSMUSG00000067848	0.617575	1.71953	5.35026	0.321391	0.747914		4933402N22Rik
ENSMUSG00000095794	239.142	1.71925	0.652533	2.63474	0.00842016	0.0391099	Igkv6-17
ENSMUSG00000076874	1.08961	1.71901	3.78192	0.454534	0.649445		Traj59
ENSMUSG00000100672	0.559856	1.71867	5.30573	0.323927	0.745994		Gm28404
ENSMUSG00000102037	268.633	1.71758	0.473679	3.62605	0.000287788	0.00290798	Bcl2a1a
ENSMUSG00000085572	6.95775	1.71733	1.42299	1.20685	0.227491		Gm16234
ENSMUSG00000049130	453.551	1.71723	0.524248	3.27561	0.00105432	0.00791712	C5ar1
ENSMUSG00000034641	240.266	1.71686	0.491021	3.49652	0.000471374	0.00429825	Cd300ld
ENSMUSG00000020286	1.65487	1.71661	2.43754	0.704237	0.481285		1700093K21Rik
ENSMUSG00000080846	4.48054	1.7162	0.959749	1.78818	0.073747		Gm13379
ENSMUSG00000105707	2.54626	1.71608	1.61457	1.06287	0.28784		Gm43753
ENSMUSG00000062168	121.781	1.71588	0.764089	2.24565	0.0247265	0.0880441	Ppef1
ENSMUSG00000064558	2.30524	1.71481	1.36185	1.25918	0.207967		Gm24620
ENSMUSG00000111388	7.59817	1.71444	0.892736	1.92043	0.0548032		Gm7183
ENSMUSG00000103445	1.21886	1.71444	2.51889	0.680633	0.496104		Gm36948
ENSMUSG00000097628	20.8324	1.7141	0.63722	2.68996	0.00714604	0.0345585	Gm2383
ENSMUSG00000027886	0.910843	1.71333	2.22881	0.76872	0.44206		1700013F07Rik
ENSMUSG00000081664	2.01155	1.7125	2.26197	0.757083	0.449		Gm15544
ENSMUSG00000045498	5.23646	1.71215	0.96835	1.76811	0.077043		Pcdhb3
ENSMUSG00000038209	35853.6	1.71136	1.30916	1.30723	0.191135	0.375713	Itln1
ENSMUSG00000070896	7.5736	1.71132	0.894005	1.91422	0.0555923		Rpl23a-ps1
ENSMUSG00000106980	1.06213	1.71074	3.411	0.501535	0.615995		Gm43690
ENSMUSG00000106476	2.71191	1.70987	1.58326	1.07997	0.280154		Rpl36-ps9
ENSMUSG00000108700	58.9446	1.70969	0.420541	4.06544	4.79412e-05	0.000738014	Gm7482
ENSMUSG00000103257	5.71444	1.70921	1.04717	1.63222	0.102633		Gm7977
ENSMUSG00000105071	4.66824	1.70885	1.37088	1.24654	0.212568		Gm43336
ENSMUSG00000101652	4.70576	1.70744	1.19043	1.4343	0.151486		Gm6060
ENSMUSG00000041445	49.008	1.70744	0.850944	2.00652	0.0448009	0.136484	Mmrn2
ENSMUSG00000109821	2.50077	1.70659	1.55707	1.09603	0.273066		Gm6593
ENSMUSG00000097026	0.789026	1.70651	3.511	0.486046	0.626935		Gm26786
ENSMUSG00000020676	111.061	1.70646	0.665383	2.56463	0.0103287	0.0457461	Ccl11
ENSMUSG00000082743	1.46604	1.70625	1.91487	0.891052	0.372901		Gm12988
ENSMUSG00000114707	11.5981	1.70499	0.690328	2.46983	0.0135177	0.0559613	CT010486.2
ENSMUSG00000095027	0.626166	1.70483	5.32784	0.319986	0.748979		Gm24017
ENSMUSG00000095380	0.626166	1.70483	5.32784	0.319986	0.748979		Gm23952
ENSMUSG00000083489	4.6054	1.70451	1.20922	1.40959	0.158661		Gm11784
ENSMUSG00000032915	28.355	1.70426	0.864214	1.97204	0.0486052	0.144594	Adgre4
ENSMUSG00000102153	2.4783	1.70405	2.09149	0.814752	0.415214		Gm37474
ENSMUSG00000076522	239.142	1.704	0.667784	2.55173	0.010719	0.0469651	Igkv16-104
ENSMUSG00000103065	3.65775	1.7032	1.61529	1.05443	0.291688		Gm20236
ENSMUSG00000039913	0.927443	1.70298	4.57597	0.372156	0.709776		Pak7
ENSMUSG00000104999	1.11309	1.70286	2.50119	0.680818	0.495987		4930477O15Rik
ENSMUSG00000086944	0.415059	1.70242	5.35086	0.318159	0.750364		Gm15859
ENSMUSG00000115003	2.38698	1.70235	1.44108	1.1813	0.237482		AC093043.1
ENSMUSG00000090671	0.700597	1.70233	5.01431	0.339494	0.734238		Gm5067
ENSMUSG00000024552	0.683642	1.70167	4.14376	0.410659	0.681323		Slc14a2
ENSMUSG00000106260	3.58506	1.70155	1.1714	1.45258	0.14634		Gm43524
ENSMUSG00000022425	56.8857	1.70145	0.766818	2.21885	0.0264971	0.0927306	Enpp2
ENSMUSG00000090868	2.92352	1.70142	1.88343	0.903363	0.366333		Trav9d-4
ENSMUSG00000031343	16.9146	1.70134	1.26679	1.34303	0.179262	0.359332	Gabra3
ENSMUSG00000086189	2.13707	1.70089	1.94371	0.875077	0.381532		Gm15462
ENSMUSG00000074805	9.9826	1.70047	0.911894	1.86476	0.0622147	0.173153	Il1bos
ENSMUSG00000026358	828.926	1.69977	0.454574	3.73926	0.000184566	0.00206419	Rgs1
ENSMUSG00000102330	1.24633	1.6985	1.97822	0.858598	0.390563		Gm37234
ENSMUSG00000076543	145.26	1.69796	1.0607	1.60079	0.109424	0.257277	Igkv4-74
ENSMUSG00000090795	0.480078	1.69671	5.32788	0.318459	0.750137		Gm7346
ENSMUSG00000072109	73.6009	1.69657	0.781376	2.17126	0.0299118	0.101329	A530040E14Rik
ENSMUSG00000060759	1.11957	1.69641	1.94938	0.870234	0.384173		Olfr503
ENSMUSG00000081681	0.964646	1.69586	3.40584	0.497928	0.618535		Gm14868
ENSMUSG00000112393	3.41901	1.69576	1.30002	1.30441	0.192094		AC159624.1
ENSMUSG00000114977	1.96207	1.69531	2.30074	0.736855	0.46121		AC156016.1
ENSMUSG00000111808	2.54747	1.69498	2.14279	0.791019	0.428933		Gm18225
ENSMUSG00000095426	1.01263	1.69318	5.35043	0.316456	0.751656		Trav6d-5
ENSMUSG00000027670	24.378	1.69212	0.743276	2.27657	0.0228118	0.0829546	Ocstamp
ENSMUSG00000065431	2.922	1.69179	1.31791	1.28369	0.199251		Mir186
ENSMUSG00000112863	3.29681	1.69145	1.14042	1.48319	0.138024		Gm19181
ENSMUSG00000093537	1.16433	1.69043	2.12345	0.796075	0.425988		Gm7584
ENSMUSG00000082971	3.34696	1.69029	1.13625	1.4876	0.136857		Gm13517
ENSMUSG00000004791	15.845	1.69004	1.15721	1.46045	0.144167	0.31207	Pgf
ENSMUSG00000086896	3.0371	1.68998	1.36557	1.23757	0.215877		Cyp4x1os
ENSMUSG00000101487	2.29172	1.68981	2.11713	0.79816	0.424777		Scgb2b33
ENSMUSG00000022818	5.69324	1.68924	1.3576	1.24429	0.213393		Cyp2ab1
ENSMUSG00000081550	1.36781	1.68921	1.67277	1.00983	0.312577		Gm15877
ENSMUSG00000104202	43.014	1.68898	0.315292	5.35687	8.4674e-08	5.11549e-06	Gm8101
ENSMUSG00000083743	0.566555	1.68876	3.66693	0.460538	0.64513		Gm12421
ENSMUSG00000064637	2.55988	1.68836	1.55286	1.08726	0.276923		Snora20
ENSMUSG00000103047	0.555994	1.68774	5.3612	0.314806	0.752909		Gm37310
ENSMUSG00000081924	3.04761	1.68757	1.39655	1.20839	0.226898		Gm11191
ENSMUSG00000093739	0.795052	1.6872	3.47338	0.485752	0.627143		Gm20692
ENSMUSG00000104452	39.3031	1.68708	1.20981	1.3945	0.163166	0.338679	Ighv8-8
ENSMUSG00000106620	0.75139	1.68615	4.18782	0.402632	0.687219		Trav7-5
ENSMUSG00000112796	0.748441	1.68522	3.50412	0.480927	0.630569		Gm40770
ENSMUSG00000091550	1.06769	1.68487	3.28956	0.512189	0.608519		Gm6811
ENSMUSG00000046585	0.812843	1.68487	4.88849	0.34466	0.73035		Cfap58
ENSMUSG00000079419	536.337	1.68483	0.379949	4.43434	9.23544e-06	0.000209865	Ms4a6c
ENSMUSG00000021508	415.505	1.68437	0.800467	2.10424	0.0353575	0.114427	Cxcl14
ENSMUSG00000111880	21.7342	1.68383	0.556195	3.02742	0.00246654	0.0152619	Gm5040
ENSMUSG00000071237	2.91249	1.68357	1.17185	1.43668	0.150809		Gemin6-ps
ENSMUSG00000100543	7.99197	1.68347	0.998224	1.68647	0.0917062	0.228307	Gm29127
ENSMUSG00000100009	2.22719	1.68304	2.05665	0.818339	0.413164		Gm7967
ENSMUSG00000056880	15.5559	1.68274	0.89513	1.87988	0.0601247	0.169011	Gadl1
ENSMUSG00000112006	2.0914	1.68267	1.39833	1.20334	0.228843		AC125041.1
ENSMUSG00000049511	5.99129	1.68242	0.889971	1.89042	0.0587012		Htr1b
ENSMUSG00000085721	0.479503	1.68237	5.35626	0.314094	0.75345		Gm12796
ENSMUSG00000022886	72.4144	1.6822	0.628985	2.67447	0.00748471	0.0357809	Prl2a1
ENSMUSG00000084124	3.54635	1.68185	1.34264	1.25264	0.210336		Gm13588
ENSMUSG00000044697	1.54692	1.68147	1.63656	1.02744	0.304212		Gm5479
ENSMUSG00000076612	231.276	1.68129	0.868855	1.93506	0.052983	0.154154	Ighg2c
ENSMUSG00000025877	386.504	1.68117	0.583238	2.88248	0.00394561	0.0218803	Hk3
ENSMUSG00000058838	8872.04	1.67999	0.460619	3.64725	0.000265058	0.00273333	Rps27a-ps2
ENSMUSG00000081289	4.40744	1.6795	0.959579	1.75024	0.0800761		Gm14857
ENSMUSG00000021362	0.875352	1.67806	3.49635	0.479947	0.631265		Gcm2
ENSMUSG00000067220	3.07133	1.67756	1.6896	0.992874	0.320772		Cnga1
ENSMUSG00000078922	1678.83	1.6775	0.446474	3.75722	0.000171808	0.00194765	Tgtp1
ENSMUSG00000061809	0.511226	1.67674	5.33537	0.314269	0.753317		Tbpl2
ENSMUSG00000082026	7.24875	1.6766	1.17597	1.42572	0.15395		Gm5764
ENSMUSG00000100398	1.14639	1.67659	5.35253	0.313233	0.754104		Gm5251
ENSMUSG00000043747	1.35417	1.67643	2.72469	0.615273	0.538374		1520401A03Rik
ENSMUSG00000091542	1.92491	1.67583	2.30061	0.728427	0.466352		Gm17167
ENSMUSG00000091370	3.0745	1.67557	1.24304	1.34796	0.177672		5730435O14Rik
ENSMUSG00000081975	12.3374	1.67556	0.611742	2.739	0.00616258	0.0308546	Gm12482
ENSMUSG00000090555	4.7155	1.67528	2.66519	0.628579	0.529625		Gm8893
ENSMUSG00000027399	759.27	1.67297	0.917255	1.82389	0.0681694	0.184763	Il1a
ENSMUSG00000019539	288.18	1.67254	0.459984	3.63607	0.000276829	0.00282293	Rcn3
ENSMUSG00000105613	1.80981	1.67148	1.60923	1.03868	0.298953		Gm43684
ENSMUSG00000110712	0.997692	1.67102	2.67168	0.625456	0.531672		Gm39662
ENSMUSG00000029819	4.44344	1.66822	2.71582	0.614262	0.539042		Npy
ENSMUSG00000069372	6.81837	1.6682	1.78983	0.932045	0.351313		Ctxn3
ENSMUSG00000083320	3.56388	1.66811	0.946475	1.76244	0.0779942		Gm13935
ENSMUSG00000092019	0.961227	1.66795	2.53098	0.659012	0.509888		Gm4027
ENSMUSG00000025597	15.5666	1.66792	0.761874	2.18924	0.0285797	0.0981666	Klhl4
ENSMUSG00000103658	5.4556	1.66744	0.746958	2.23231	0.0255945		Gm37201
ENSMUSG00000112895	4.07131	1.66505	1.09295	1.52344	0.127648		AC122317.3
ENSMUSG00000021250	30640.4	1.66434	0.457234	3.64001	0.000272629	0.00279005	Fos
ENSMUSG00000093910	0.870862	1.66431	2.3519	0.707645	0.479166		Zfp853
ENSMUSG00000097443	2.17383	1.66399	3.55763	0.467724	0.639982		Gm17529
ENSMUSG00000104097	0.762386	1.66354	3.53658	0.470381	0.638083		Gm37313
ENSMUSG00000112095	5.44431	1.66343	1.32703	1.2535	0.210025		A130077B15Rik
ENSMUSG00000096459	73.3449	1.66325	1.06316	1.56445	0.117713	0.270595	Ighv9-3
ENSMUSG00000022676	40.6778	1.66291	1.89725	0.876481	0.380768	0.586974	Snai2
ENSMUSG00000058755	762.265	1.6625	0.569197	2.92079	0.00349143	0.0198636	Osm
ENSMUSG00000108493	4.62147	1.66147	1.49801	1.10912	0.26738		Gm45715
ENSMUSG00000110391	1.22697	1.6576	2.54304	0.651821	0.514517		Gm7269
ENSMUSG00000055632	30.0288	1.65727	0.812083	2.04076	0.0412746	0.128562	Hmcn2
ENSMUSG00000097705	5.84566	1.65701	1.18501	1.39831	0.162021		Gm26740
ENSMUSG00000080996	10.6626	1.65689	0.75641	2.19047	0.0284903	0.0979575	Gm4986
ENSMUSG00000096920	2.12799	1.65563	1.57841	1.04892	0.294213		Rps19-ps8
ENSMUSG00000115276	66.4564	1.65493	0.454647	3.64003	0.000272604	0.00279005	AC149588.1
ENSMUSG00000101210	1.27117	1.65439	2.04753	0.807991	0.419096		Gm28720
ENSMUSG00000087853	0.528824	1.65368	5.36676	0.308133	0.757981		Gm22794
ENSMUSG00000108420	0.749545	1.6529	3.47701	0.475379	0.634517		Gm45141
ENSMUSG00000097861	2.42085	1.65239	1.40533	1.1758	0.239675		Gm26858
ENSMUSG00000045404	11.4469	1.65176	0.813134	2.03135	0.0422198	0.130672	Kcnk13
ENSMUSG00000081578	0.454297	1.65165	5.35351	0.308517	0.757689		Gm12611
ENSMUSG00000032719	2.80442	1.65162	1.56223	1.05721	0.290414		Sbspon
ENSMUSG00000111417	0.879228	1.64993	4.72838	0.348943	0.727132		AC158987.1
ENSMUSG00000001020	27.0537	1.64881	0.725526	2.27257	0.0230518	0.083554	S100a4
ENSMUSG00000047013	1.59133	1.64855	2.07329	0.795136	0.426534		Fbxo41
ENSMUSG00000115598	14.9935	1.64794	0.636589	2.5887	0.00963395	0.0434288	AC144819.1
ENSMUSG00000002459	6.37557	1.64685	1.4615	1.12682	0.259818		Rgs20
ENSMUSG00000081778	2.82025	1.64516	4.29918	0.382668	0.701966		Gm6325
ENSMUSG00000096670	21.515	1.64442	1.11013	1.48128	0.138531	0.303684	Ighv2-6
ENSMUSG00000111063	2.17197	1.64441	1.66931	0.98508	0.324585		Zkscan7
ENSMUSG00000021541	0.902472	1.64352	2.61264	0.629063	0.529308		Trpc7
ENSMUSG00000042961	4.75283	1.64107	1.07061	1.53284	0.125316		Egflam
ENSMUSG00000028883	22.0752	1.64076	1.1493	1.42762	0.153402	0.324681	Sema3a
ENSMUSG00000006764	0.808876	1.64058	3.62405	0.452693	0.65077		Tph2
ENSMUSG00000081594	12.8653	1.63954	0.692138	2.3688	0.0178459	0.068946	Gm15467
ENSMUSG00000111868	12.595	1.6384	0.773978	2.11686	0.0342715	0.111888	AC156273.1
ENSMUSG00000087434	0.566503	1.63785	3.7072	0.441801	0.658633		Rab11fip4os1
ENSMUSG00000035004	416.962	1.63593	0.580183	2.81968	0.00480714	0.0253638	Igsf6
ENSMUSG00000068122	4.33782	1.63516	0.934831	1.74915	0.0802645		Agtr2
ENSMUSG00000106820	3.20292	1.63435	1.29152	1.26545	0.205712		D5Ertd605e
ENSMUSG00000069125	48.9438	1.63402	0.480488	3.40075	0.000672	0.00559217	Rps24-ps2
ENSMUSG00000026656	1037.83	1.63396	0.650089	2.51344	0.011956	0.0512397	Fcgr2b
ENSMUSG00000089827	16.0427	1.63327	0.707764	2.30765	0.0210186	0.0780519	1700023H06Rik
ENSMUSG00000092609	63.5181	1.63327	1.00974	1.61752	0.105766	0.251428	Gm20481
ENSMUSG00000044206	4.40594	1.63142	1.80475	0.90396	0.366016		Vsig4
ENSMUSG00000097998	1.03904	1.63106	3.1018	0.525842	0.598998		Gm27019
ENSMUSG00000072473	0.500125	1.63092	5.33263	0.305839	0.759727		1700024G13Rik
ENSMUSG00000082220	5.88862	1.62986	1.1438	1.42495	0.154172		Gm12943
ENSMUSG00000111681	0.425759	1.62924	5.35337	0.304339	0.760869		AC138284.4
ENSMUSG00000033082	8.65498	1.6289	1.79578	0.907068	0.364371	0.570849	Clec1a
ENSMUSG00000029607	13.7423	1.62888	0.798199	2.0407	0.0412811	0.128562	Ankrd61
ENSMUSG00000086107	5.10365	1.62867	1.05308	1.54658	0.121965		Gm16312
ENSMUSG00000057499	89.9047	1.62765	0.426148	3.81946	0.000133746	0.00162324	Gm6177
ENSMUSG00000065599	0.908024	1.62735	2.6143	0.622478	0.533627		Mir23b
ENSMUSG00000089308	1.51333	1.62664	1.86282	0.873213	0.382547		Gm24837
ENSMUSG00000052616	10.72	1.6251	0.817865	1.987	0.0469226	0.1411	Terb1
ENSMUSG00000076480	20.4367	1.62496	0.91622	1.77355	0.0761373	0.200042	Trbv29
ENSMUSG00000103970	1.10161	1.62465	3.89826	0.416763	0.676852		Gm37678
ENSMUSG00000071893	5.05088	1.62412	1.40153	1.15881	0.246532		Vmn1r4
ENSMUSG00000027961	3.1027	1.62368	1.62985	0.996219	0.319144		Lrrc39
ENSMUSG00000107385	1.11752	1.62355	2.56817	0.632181	0.527269		C330024D21Rik
ENSMUSG00000062252	2.26137	1.62317	1.64615	0.986038	0.324115		Lhfpl5
ENSMUSG00000076486	1.84584	1.62281	1.68787	0.961453	0.336324		Trbj1-4
ENSMUSG00000038523	1.7299	1.62243	2.29436	0.707137	0.479481		1700003F12Rik
ENSMUSG00000027360	1595.71	1.62214	0.608018	2.66792	0.00763222	0.0363507	Hdc
ENSMUSG00000105160	7.32273	1.62212	1.71458	0.946075	0.34411		A530030E21Rik
ENSMUSG00000073063	1.32266	1.62104	2.89479	0.559985	0.57549		Hbq1b
ENSMUSG00000046961	0.886104	1.62095	4.8213	0.336207	0.736715		Gpr156
ENSMUSG00000065034	0.587493	1.62066	4.31701	0.375413	0.707353		Gm22363
ENSMUSG00000064540	2.02106	1.62023	2.07906	0.779311	0.435796		Snord42a
ENSMUSG00000083932	0.581056	1.62001	3.64867	0.444	0.657042		Gm11438
ENSMUSG00000082464	0.904988	1.61984	2.23089	0.726098	0.467779		Rab9b-ps1
ENSMUSG00000102765	5.23386	1.61965	2.07237	0.781544	0.434483		Ighv1-62
ENSMUSG00000004730	297.392	1.6196	0.417929	3.87531	0.000106491	0.00136331	Adgre1
ENSMUSG00000084404	3.08271	1.61846	1.09853	1.4733	0.140669		Gm12513
ENSMUSG00000081451	29.4426	1.61782	0.435318	3.71642	0.000202068	0.0022129	Gm12734
ENSMUSG00000102258	22.8577	1.6174	0.693621	2.33183	0.0197098	0.0744637	Gm38257
ENSMUSG00000087341	136.133	1.61696	0.507928	3.18345	0.00145532	0.0101791	0610040F04Rik
ENSMUSG00000102577	22.7011	1.61682	0.593268	2.72527	0.00642482	0.0318117	Gm37969
ENSMUSG00000020007	5.68161	1.61669	2.47079	0.654321	0.512905		Il20ra
ENSMUSG00000086527	0.745665	1.61589	4.19118	0.385546	0.699833		Gm15856
ENSMUSG00000113781	1.21396	1.61514	1.84107	0.87728	0.380335		Gm35558
ENSMUSG00000106752	4.64203	1.61495	0.845036	1.9111	0.055992		Gm3348
ENSMUSG00000115725	0.823593	1.61477	3.98895	0.40481	0.685617		AC164437.4
ENSMUSG00000106169	3.43818	1.61403	1.50062	1.07557	0.282118		Mir6948
ENSMUSG00000093838	15.1388	1.61351	1.45604	1.10815	0.267795	0.469398	Ighv3-1
ENSMUSG00000102300	1.9049	1.6129	1.87981	0.85801	0.390887		Gm34106
ENSMUSG00000081985	0.536651	1.61217	5.26273	0.306338	0.759347		Gng2-ps1
ENSMUSG00000078921	1873.17	1.61211	0.416262	3.87282	0.000107581	0.00137288	Tgtp2
ENSMUSG00000105755	2.1855	1.61086	1.67006	0.964553	0.334769		Gm43514
ENSMUSG00000064565	1.29276	1.61053	1.93721	0.831367	0.405766		Gm24145
ENSMUSG00000107157	5.98192	1.61022	0.934068	1.72388	0.0847291		Gm3170
ENSMUSG00000052551	1.29345	1.60939	1.84689	0.871409	0.383531		Adarb2
ENSMUSG00000028785	27.6488	1.60939	0.826585	1.94703	0.0515309	0.151028	Hpca
ENSMUSG00000098065	2.50578	1.60911	1.50612	1.06838	0.285348		Gm5177
ENSMUSG00000023064	26.3906	1.60893	1.06663	1.50842	0.131448	0.292567	Sncg
ENSMUSG00000114249	16.6874	1.6079	0.694281	2.31593	0.0205623	0.0768137	AC154595.1
ENSMUSG00000104997	1.70853	1.60707	1.36287	1.17918	0.238325		Gm44350
ENSMUSG00000021098	0.883193	1.6066	2.66178	0.603582	0.546122		4930447C04Rik
ENSMUSG00000110499	1.23189	1.60641	2.70941	0.592901	0.553247		Gm45873
ENSMUSG00000082634	1.14029	1.6058	2.30762	0.695867	0.486512		Gm12900
ENSMUSG00000111690	1.08696	1.60467	3.35284	0.4786	0.632223		AC122305.4
ENSMUSG00000085582	0.530789	1.60375	5.3093	0.302065	0.762603		3110099E03Rik
ENSMUSG00000028859	1779.79	1.60316	0.637471	2.51487	0.0119076	0.0510871	Csf3r
ENSMUSG00000085878	0.7961	1.60311	2.41857	0.662835	0.507437		Gm12823
ENSMUSG00000103591	2.37126	1.60301	1.54968	1.03441	0.300943		Gm38365
ENSMUSG00000101854	2.83848	1.60259	1.8097	0.885552	0.375859		1700026F02Rik
ENSMUSG00000089695	6.30235	1.60226	1.04811	1.52872	0.126334		Gm15946
ENSMUSG00000115591	1.10945	1.60152	2.53585	0.631552	0.52768		AC132833.3
ENSMUSG00000113857	1.57754	1.60148	2.3056	0.694603	0.487304		AC124772.3
ENSMUSG00000106717	29.6024	1.60125	0.517546	3.09392	0.00197529	0.0128748	Gm42798
ENSMUSG00000096326	0.853593	1.60026	5.32481	0.300529	0.763774		Ighv1-78
ENSMUSG00000078817	95.7051	1.6001	0.778365	2.05572	0.03981	0.125131	Nlrp12
ENSMUSG00000085871	5.38342	1.59974	1.26294	1.26667	0.205272		Ube2uos
ENSMUSG00000110698	14.9211	1.59888	1.03386	1.54652	0.121978	0.277339	Gm45875
ENSMUSG00000103234	2.45908	1.59819	1.37367	1.16344	0.244652		Gm37158
ENSMUSG00000093598	3.12808	1.59796	1.68475	0.948486	0.342882		A730085K08Rik
ENSMUSG00000090942	33.9985	1.5977	0.780194	2.04782	0.0405777	0.126885	F830016B08Rik
ENSMUSG00000074796	180.442	1.59734	0.46522	3.43351	0.000595818	0.00512675	Slc4a11
ENSMUSG00000082151	3.80456	1.59623	1.15488	1.38215	0.166924		Gm11810
ENSMUSG00000085924	0.517333	1.59492	5.33974	0.298689	0.765177		Gm8980
ENSMUSG00000097358	5.87707	1.59464	1.064	1.49873	0.133943		Gm26773
ENSMUSG00000083156	0.904053	1.59416	3.65582	0.43606	0.662793		Gm12201
ENSMUSG00000082709	2.55425	1.59369	1.11352	1.43122	0.152367		Gm12362
ENSMUSG00000055555	2.1733	1.59358	1.96129	0.812517	0.416495		4930502E18Rik
ENSMUSG00000076462	17.8137	1.59302	0.753374	2.11452	0.034471	0.112388	Trbv2
ENSMUSG00000113505	0.438524	1.59287	5.34906	0.297785	0.765868		AC154482.1
ENSMUSG00000102413	0.577426	1.59267	5.35393	0.297477	0.766102		Gm36937
ENSMUSG00000085941	3.59594	1.59243	1.52232	1.04605	0.295536		Gm11201
ENSMUSG00000096174	5.54636	1.59215	0.828053	1.92276	0.0545102		Gm22991
ENSMUSG00000103042	2.81723	1.59118	1.39823	1.138	0.255122		Gm2719
ENSMUSG00000102856	6.58033	1.59065	1.48281	1.07273	0.283392		Gm37084
ENSMUSG00000018543	2.61228	1.59049	1.30129	1.22224	0.221617		1700001P01Rik
ENSMUSG00000083885	24.8574	1.59029	0.743211	2.13976	0.0323746	0.107442	Gm13213
ENSMUSG00000101682	0.50704	1.58908	5.32662	0.298329	0.765452		Gm29228
ENSMUSG00000090001	2.59721	1.58848	1.45984	1.08812	0.276542		Gm9719
ENSMUSG00000110251	1.52192	1.58838	2.49045	0.637788	0.523612		Gm2996
ENSMUSG00000086994	2.27319	1.58835	1.52145	1.04397	0.296498		Gm13402
ENSMUSG00000087281	0.771367	1.58809	5.34923	0.296882	0.766557		Gm16015
ENSMUSG00000100215	85.5177	1.58756	0.378259	4.19702	2.7045e-05	0.000477334	Gm8292
ENSMUSG00000087642	6.61821	1.58714	2.12051	0.748471	0.454176		Ighe
ENSMUSG00000065347	1.15146	1.58705	2.07078	0.7664	0.443438		Gm25583
ENSMUSG00000111904	26.756	1.58644	0.52214	3.03833	0.0023789	0.0148567	AC165349.1
ENSMUSG00000111489	0.588974	1.58636	5.35725	0.296114	0.767143		1700019J19Rik
ENSMUSG00000005980	4.75042	1.58607	1.17401	1.35098	0.1767		Dnase1
ENSMUSG00000107461	1.05648	1.58595	5.28555	0.300054	0.764136		Gm44045
ENSMUSG00000065999	7.01327	1.58585	0.939272	1.68838	0.091338		Zfp985
ENSMUSG00000106208	33.5537	1.58585	0.372694	4.25509	2.08961e-05	0.000390157	Gm4734
ENSMUSG00000097078	5.34225	1.58557	1.0797	1.46852	0.141963		Gm26566
ENSMUSG00000028197	5.7235	1.5853	1.83418	0.864308	0.387419		Col24a1
ENSMUSG00000102649	12.5264	1.58522	0.760171	2.08535	0.0370379	0.118636	Gm38021
ENSMUSG00000085915	5.24492	1.58492	1.04464	1.5172	0.129216		Gm8091
ENSMUSG00000021091	2098.54	1.5849	0.771359	2.05468	0.0399097	0.125306	Serpina3n
ENSMUSG00000073145	0.851832	1.58465	5.31058	0.298395	0.765401		Gm12000
ENSMUSG00000054417	149.631	1.58421	1.10235	1.43712	0.150684	0.32145	Cyp3a44
ENSMUSG00000110120	1.8208	1.58409	2.08329	0.760378	0.447029		Gm45251
ENSMUSG00000111442	1.35503	1.58396	2.70494	0.58558	0.558158		AC153971.2
ENSMUSG00000095366	1.94214	1.58327	2.0965	0.755194	0.450132		Gm21860
ENSMUSG00000104852	8.29471	1.5824	0.9401	1.68323	0.0923309	0.229359	Gm43201
ENSMUSG00000059252	91.5996	1.58105	0.273459	5.78165	7.39715e-09	7.4332e-07	Tpt1-ps5
ENSMUSG00000040428	19.2205	1.58066	0.708859	2.22987	0.0257561	0.0908601	Plekha4
ENSMUSG00000082108	2.16297	1.58063	1.60289	0.986108	0.32408		Gm13777
ENSMUSG00000096467	9.66146	1.58012	1.01548	1.55603	0.1197	0.273679	Scgb2b19
ENSMUSG00000083086	6.18562	1.57952	1.12677	1.40181	0.160971		Gm15531
ENSMUSG00000086920	22.4558	1.57925	0.785921	2.00943	0.0444919	0.13575	Gm12207
ENSMUSG00000113841	17.461	1.5785	0.624372	2.52814	0.0114667	0.0496089	AC122357.3
ENSMUSG00000079550	1.19239	1.57844	2.04964	0.770106	0.441237		Mpp4
ENSMUSG00000107495	1.99167	1.5781	1.80317	0.875178	0.381477		Gm44215
ENSMUSG00000073494	7.87287	1.57666	0.962673	1.6378	0.101464	0.244754	Sh2d1b2
ENSMUSG00000091114	1.67241	1.57662	1.57067	1.00379	0.315479		Gm3138
ENSMUSG00000113862	1.22043	1.57657	2.31976	0.679629	0.49674		Gm7537
ENSMUSG00000027832	48.2628	1.5761	2.10773	0.74777	0.454599	0.652466	Ptx3
ENSMUSG00000109876	0.830053	1.57578	3.99731	0.39421	0.693426		Gm45449
ENSMUSG00000059089	510.577	1.57555	0.531588	2.96386	0.00303807	0.017921	Fcgr4
ENSMUSG00000109492	9.8727	1.57513	0.678226	2.32243	0.0202097	0.0759088	Gm33882
ENSMUSG00000106595	0.755948	1.57465	2.52706	0.623116	0.533208		Gm44314
ENSMUSG00000071207	7.77197	1.57435	0.664419	2.36951	0.0178119		Gm8587
ENSMUSG00000112424	1.685	1.57292	1.9073	0.824683	0.409552		Gm6494
ENSMUSG00000069041	34.4299	1.57244	0.867136	1.81337	0.0697751	0.187868	Slc25a31
ENSMUSG00000108555	16.5037	1.57188	0.704809	2.23023	0.0257323	0.0908168	Gm18310
ENSMUSG00000029236	6.28975	1.57152	1.18643	1.32458	0.18531		Nmu
ENSMUSG00000039059	1.86323	1.57092	1.65736	0.94785	0.343206		Hrh3
ENSMUSG00000115537	2.81592	1.57085	1.51245	1.03861	0.298988		AC137871.3
ENSMUSG00000073980	2.37491	1.57076	1.41697	1.10853	0.267632		Gm9574
ENSMUSG00000066515	17.1816	1.56901	0.847167	1.85206	0.0640168	0.176547	Klk1b3
ENSMUSG00000043410	10.3559	1.56863	1.23707	1.26801	0.204793	0.392905	Hfm1
ENSMUSG00000037653	1.72657	1.56839	5.29956	0.295947	0.76727		Kctd8
ENSMUSG00000095296	0.64716	1.56804	3.52894	0.444339	0.656798		Gm8906
ENSMUSG00000106495	3.93607	1.56801	1.54212	1.01678	0.309256		Gm42755
ENSMUSG00000048230	1.86012	1.5671	1.61674	0.969293	0.332399		Fbxo43
ENSMUSG00000029608	0.956631	1.56677	5.3467	0.293036	0.769495		Rph3a
ENSMUSG00000110747	1.90752	1.56674	2.03216	0.770973	0.440723		Gm35657
ENSMUSG00000081613	0.717026	1.5667	2.47453	0.63313	0.526648		Gm12109
ENSMUSG00000078252	1.31088	1.56591	2.97506	0.526346	0.598648		Krtap17-1
ENSMUSG00000104707	0.912481	1.56574	2.14755	0.729082	0.465951		Gm43649
ENSMUSG00000114127	39.8696	1.56567	0.415611	3.76715	0.000165125	0.00188686	Gm8231
ENSMUSG00000039154	3.19205	1.56497	2.59289	0.603563	0.546134		Shd
ENSMUSG00000113512	0.863455	1.56426	4.73925	0.330065	0.741351		Gm9063
ENSMUSG00000115604	28.2041	1.56339	0.499058	3.13268	0.00173219	0.0116511	AC112945.1
ENSMUSG00000095288	60.3594	1.56279	0.313976	4.97741	6.44392e-07	2.48763e-05	Gm7618
ENSMUSG00000048316	2.72225	1.56171	1.30206	1.19942	0.230366		Gm9823
ENSMUSG00000109080	0.482768	1.56168	5.35712	0.291515	0.770657		Gm38944
ENSMUSG00000067818	284.854	1.56167	1.03707	1.50585	0.132106	0.293715	Myl9
ENSMUSG00000096157	7.73853	1.56157	0.707029	2.20864	0.0271998		Gm5472
ENSMUSG00000085242	2.10977	1.5601	2.60968	0.597812	0.549966		Gm11537
ENSMUSG00000089296	4.44586	1.56009	1.32207	1.18004	0.237984		Gm23205
ENSMUSG00000104315	2.80699	1.56006	1.50499	1.03659	0.299925		Gm37906
ENSMUSG00000025479	32.1518	1.55954	1.12153	1.39055	0.164362	0.339926	Cyp2e1
ENSMUSG00000082549	1.19079	1.5587	3.13614	0.497012	0.619181		Gm14813
ENSMUSG00000040552	154.079	1.55858	0.592341	2.63122	0.00850799	0.0394469	C3ar1
ENSMUSG00000056821	2.45811	1.55802	1.77896	0.875805	0.381136		1700028I16Rik
ENSMUSG00000021579	1.6384	1.55781	1.39683	1.11525	0.264743		Lrrc14b
ENSMUSG00000115709	0.884824	1.55747	2.65526	0.586562	0.557498		AC134577.2
ENSMUSG00000070469	5.85871	1.55545	1.13565	1.36967	0.170791		Adamtsl3
ENSMUSG00000031450	0.666721	1.5552	5.36469	0.289895	0.771896		Grk1
ENSMUSG00000046085	0.94718	1.55508	3.95972	0.392725	0.694523		4931422A03Rik
ENSMUSG00000105434	9.79269	1.55344	1.09924	1.41319	0.1576	0.330591	Gm43359
ENSMUSG00000096415	1.45807	1.55177	1.91098	0.812032	0.416773		Gm24722
ENSMUSG00000105694	12.3364	1.5517	0.902624	1.7191	0.085597	0.217661	Gm43237
ENSMUSG00000101920	0.707176	1.5516	2.75593	0.563004	0.573432		Gm28454
ENSMUSG00000105963	0.505191	1.55145	5.32765	0.291208	0.770892		Gm43647
ENSMUSG00000091311	2.92126	1.55111	1.97532	0.785243	0.432311		Spata31d1b
ENSMUSG00000089683	2.40383	1.54988	1.61657	0.958743	0.337688		4930570N18Rik
ENSMUSG00000095788	85.3457	1.54962	0.558479	2.7747	0.00552519	0.0282598	Sirpb1a
ENSMUSG00000099025	2.65058	1.54916	2.00575	0.772358	0.439903		Gm27162
ENSMUSG00000089965	0.700549	1.54908	5.34739	0.289689	0.772054		Gm16236
ENSMUSG00000097206	3.75165	1.54887	1.4521	1.06665	0.286132		Gm26699
ENSMUSG00000102606	33.7135	1.54874	0.385131	4.02134	5.7868e-05	0.000847755	Rpl21-ps1
ENSMUSG00000103011	7.71641	1.54785	0.83557	1.85245	0.0639608		Gm8860
ENSMUSG00000114355	2.99698	1.54682	1.65715	0.933424	0.350601		CT009713.2
ENSMUSG00000032492	11.2732	1.54667	1.04268	1.48336	0.13798	0.302741	Pth1r
ENSMUSG00000099631	1.48944	1.54642	1.95511	0.790964	0.428965		Gm8641
ENSMUSG00000065208	14.8011	1.54612	0.682662	2.26484	0.0235225	0.0848448	Gm24616
ENSMUSG00000107465	2.65453	1.54596	1.54355	1.00156	0.316555		Gm5990
ENSMUSG00000109875	32.4235	1.54579	0.386021	4.00442	6.21704e-05	0.00089376	Gm45456
ENSMUSG00000113237	192.695	1.54577	0.285434	5.4155	6.11176e-08	4.02543e-06	Gm6109
ENSMUSG00000105327	17.9887	1.54567	0.577602	2.67602	0.00745016	0.0356499	Gm9409
ENSMUSG00000058932	50.8927	1.54554	0.62908	2.45683	0.0140171	0.0574149	Gm2174
ENSMUSG00000090126	17.6123	1.54416	0.580394	2.66054	0.00780165	0.0369253	4930519F09Rik
ENSMUSG00000108183	4.67738	1.54383	0.982117	1.57194	0.115965		Gm44227
ENSMUSG00000083306	7.08921	1.5438	1.2798	1.20628	0.227708		Gm13868
ENSMUSG00000091382	1.1409	1.54349	1.77876	0.867731	0.385541		Vmn1r18
ENSMUSG00000033847	9330.87	1.54248	0.813608	1.89585	0.05798	0.164702	Pla2g4c
ENSMUSG00000090352	1.85213	1.54229	3.29337	0.468301	0.639569		Gm3972
ENSMUSG00000026073	1017.67	1.54185	0.677552	2.27562	0.0228691	0.0830873	Il1r2
ENSMUSG00000097554	986.521	1.54167	0.739425	2.08496	0.0370729	0.11871	Gm26825
ENSMUSG00000041754	110.713	1.54151	0.855816	1.80122	0.0716686	0.191215	Trem3
ENSMUSG00000112697	118.706	1.54117	0.309944	4.97242	6.61229e-07	2.53793e-05	Gm8137
ENSMUSG00000102973	1.98024	1.53999	4.08554	0.376937	0.70622		E430014B02Rik
ENSMUSG00000106149	5.21417	1.53973	1.24554	1.23619	0.216388		Gm43430
ENSMUSG00000098421	0.99647	1.5394	5.2916	0.290913	0.771118		Gm27190
ENSMUSG00000077575	5.25698	1.53893	1.23649	1.2446	0.213278		Gm24888
ENSMUSG00000097183	7.05655	1.53878	1.15933	1.3273	0.18441		Gm17501
ENSMUSG00000094016	16.5689	1.53849	0.977818	1.57339	0.115629	0.267278	Trav15-1-dv6-1
ENSMUSG00000097762	3.05606	1.53763	1.57456	0.97655	0.328792		4732463B04Rik
ENSMUSG00000107730	0.475201	1.53661	5.27844	0.291111	0.770967		Gm44238
ENSMUSG00000083723	20.4506	1.53612	0.672004	2.28588	0.0222612	0.0815604	Rpl23a-ps14
ENSMUSG00000081308	16.7943	1.53565	0.635208	2.41755	0.0156255	0.0622066	Gm14480
ENSMUSG00000045954	74.9123	1.53488	0.535567	2.8659	0.00415823	0.0227267	Cavin2
ENSMUSG00000098243	2.22855	1.53466	1.68312	0.911791	0.361879		Gm4258
ENSMUSG00000063590	0.514819	1.53439	5.29362	0.289857	0.771925		Slc22a28
ENSMUSG00000087819	2.94593	1.53426	1.27749	1.20099	0.229755		Gm25117
ENSMUSG00000087915	1.08654	1.53425	3.37051	0.455199	0.648966		Gm24909
ENSMUSG00000044217	2.12561	1.53411	3.38092	0.453756	0.650004		Aqp5
ENSMUSG00000104872	0.562362	1.5341	4.31469	0.355553	0.722175		1700008B11Rik
ENSMUSG00000024128	1.11753	1.53292	2.12407	0.721693	0.470483		Sbp
ENSMUSG00000108609	3.94546	1.53233	0.925874	1.65501	0.0979226		Gm7424
ENSMUSG00000097464	27.4719	1.53162	0.797107	1.92147	0.0546719	0.157965	Gm26736
ENSMUSG00000076927	0.587266	1.53139	4.31299	0.355064	0.722541		Traj1
ENSMUSG00000103854	2.12684	1.53122	1.63975	0.933817	0.350398		Gm37250
ENSMUSG00000022525	0.408477	1.53076	5.35975	0.285604	0.775182		Hrasls
ENSMUSG00000060268	2.29961	1.53033	1.71951	0.88998	0.373477		Gm1661
ENSMUSG00000107013	1.80383	1.52846	1.69673	0.900824	0.367682		Gm43635
ENSMUSG00000097407	2.25768	1.52822	1.23074	1.24171	0.214342		4933408J17Rik
ENSMUSG00000097308	0.439405	1.52801	3.91744	0.390053	0.696497		Gm6410
ENSMUSG00000094127	2.20574	1.52731	2.12844	0.717572	0.473021		G530012D18Rik
ENSMUSG00000063133	0.535111	1.52725	5.34251	0.285868	0.774979		Klk1b1
ENSMUSG00000061619	1.29513	1.52718	1.90824	0.800308	0.423533		Vma21-ps
ENSMUSG00000054988	0.558747	1.52603	5.36088	0.284661	0.775904		Agtr1b
ENSMUSG00000074060	2.5313	1.5259	1.69395	0.900798	0.367695		Fbxw15
ENSMUSG00000070130	1.97962	1.52542	1.90619	0.800248	0.423567		Mir328
ENSMUSG00000093867	74.0119	1.52472	0.537897	2.8346	0.00458835	0.024448	Gsdmcl2
ENSMUSG00000110366	2.15805	1.52437	1.91638	0.795444	0.426355		Gm45885
ENSMUSG00000079608	3.02663	1.5217	1.44354	1.05415	0.291815		Stard6
ENSMUSG00000036578	3.21042	1.52103	1.27947	1.18879	0.23452		Fxyd7
ENSMUSG00000083793	18.4341	1.52073	0.680296	2.2354	0.0253911	0.0898825	Gm14274
ENSMUSG00000007655	282.705	1.5206	0.555286	2.73841	0.0061737	0.030887	Cav1
ENSMUSG00000081359	18.021	1.52058	0.445766	3.41117	0.000646845	0.00543029	Cox20-ps
ENSMUSG00000096850	2.00311	1.52018	2.227	0.682614	0.494851		Gm21748
ENSMUSG00000112001	128.526	1.5201	0.373582	4.06899	4.72165e-05	0.000727979	Gm8112
ENSMUSG00000113146	0.451556	1.51938	4.47368	0.339626	0.734138		AC126043.1
ENSMUSG00000036103	128.941	1.51933	0.561423	2.70621	0.00680556	0.0332659	Colec12
ENSMUSG00000066512	1180.03	1.51833	0.326338	4.65263	3.27721e-06	9.10891e-05	Klk1b5
ENSMUSG00000083569	1.7697	1.5183	1.49658	1.01451	0.310338		Gm13666
ENSMUSG00000103546	49.5015	1.518	0.648532	2.34067	0.0192489	0.073165	Gm37666
ENSMUSG00000108443	208.624	1.5177	0.606735	2.50143	0.0123693	0.05246	Gm44510
ENSMUSG00000100425	0.843767	1.51738	2.95879	0.512838	0.608065		Gm29131
ENSMUSG00000020892	3.70166	1.51602	1.37841	1.09983	0.271407		Aloxe3
ENSMUSG00000083812	2.24121	1.51583	1.27536	1.18856	0.234615		Gm5054
ENSMUSG00000112051	129.261	1.51524	0.374736	4.04349	5.26612e-05	0.000793568	Gm8158
ENSMUSG00000110591	0.50799	1.51517	5.29704	0.286041	0.774847		Gm31371
ENSMUSG00000099354	7.69303	1.51508	0.894062	1.6946	0.0901512		1700124L16Rik
ENSMUSG00000085327	4.14772	1.51485	1.41106	1.07356	0.283021		Gm16104
ENSMUSG00000088171	3.13773	1.51463	1.53549	0.986415	0.323929		Gm25220
ENSMUSG00000109214	1.41698	1.51422	2.61766	0.578463	0.562951		Gm44659
ENSMUSG00000081789	36.3177	1.51292	0.398636	3.79525	0.000147496	0.00174525	Gm11893
ENSMUSG00000097379	3.8551	1.51186	1.45977	1.03569	0.300349		Gm26873
ENSMUSG00000109243	5.29092	1.51169	1.1899	1.27043	0.20393		Gm45867
ENSMUSG00000110516	2.08482	1.51051	2.38178	0.634194	0.525954		Gm45758
ENSMUSG00000090907	0.520074	1.51035	5.36498	0.28152	0.778311		C030017D09Rik
ENSMUSG00000076505	1.27582	1.51003	3.14769	0.479726	0.631422		Igkv1-131
ENSMUSG00000105532	10.6707	1.50989	0.830912	1.81715	0.0691947	0.186833	Gm5279
ENSMUSG00000112748	6.02522	1.50975	0.920975	1.63929	0.101153		Gm6331
ENSMUSG00000090117	1.79511	1.50947	1.72763	0.873719	0.382271		Gm16541
ENSMUSG00000032048	1.64208	1.50934	2.11007	0.715302	0.474422		4930510E17Rik
ENSMUSG00000113931	1.70076	1.50857	1.57974	0.954949	0.339603		Gm5928
ENSMUSG00000096221	22.3147	1.50801	0.752197	2.00481	0.0449834	0.136862	1500002C15Rik
ENSMUSG00000115210	1.47397	1.50799	1.86945	0.806648	0.419869		AC120375.1
ENSMUSG00000110524	6.70069	1.50775	1.12374	1.34172	0.179687		Gm39228
ENSMUSG00000048482	4.92179	1.50759	1.4833	1.01638	0.309451		Bdnf
ENSMUSG00000104798	5.03515	1.50717	0.918222	1.6414	0.100715		Gm20121
ENSMUSG00000104775	7.0473	1.50695	0.78196	1.92714	0.0539616		Gm8182
ENSMUSG00000004031	2.61373	1.50658	2.0619	0.730678	0.464976		Brinp2
ENSMUSG00000046834	2.92951	1.50658	1.50985	0.997832	0.318361		Krt1
ENSMUSG00000097840	2.9023	1.50658	2.80704	0.536714	0.591465		Gm26756
ENSMUSG00000087794	2.86059	1.50629	2.2667	0.66453	0.506351		Gm25966
ENSMUSG00000052821	32.5382	1.50616	0.748307	2.01276	0.04414	0.134965	Cysltr1
ENSMUSG00000022057	1686.43	1.5059	0.822961	1.82985	0.067272	0.18325	Adamdec1
ENSMUSG00000022534	321.947	1.50566	0.607527	2.47835	0.0131993	0.0551266	Mefv
ENSMUSG00000110774	8.42543	1.50565	0.822695	1.83014	0.0672291	0.183158	Gm39318
ENSMUSG00000033569	0.610782	1.50502	5.3597	0.280803	0.778861		Adgrb3
ENSMUSG00000021609	1.6426	1.5047	2.16938	0.693605	0.48793		Slc6a3
ENSMUSG00000096088	2.7632	1.50444	1.35455	1.11066	0.266715		Gm12614
ENSMUSG00000091938	8.50283	1.50414	1.84192	0.816614	0.414149	0.618086	Gm2564
ENSMUSG00000055003	5.62603	1.5039	1.12744	1.3339	0.182236		Lrtm2
ENSMUSG00000109473	1.18061	1.5038	2.40045	0.626466	0.531009		B930025P03Rik
ENSMUSG00000113383	0.465669	1.50292	5.35388	0.280715	0.778929		AC154347.2
ENSMUSG00000096635	2.29546	1.50277	1.33462	1.12599	0.260169		Gm22174
ENSMUSG00000066009	1.4977	1.50275	2.4621	0.610351	0.541629		Zfp987
ENSMUSG00000024593	0.404982	1.50237	5.35726	0.280436	0.779143		Megf10
ENSMUSG00000085897	14.8962	1.50165	0.59784	2.51179	0.012012	0.0514468	Gm11604
ENSMUSG00000024771	54.2738	1.50162	0.344479	4.35909	1.30603e-05	0.000275493	Lipk
ENSMUSG00000085585	0.413502	1.5006	5.34951	0.280511	0.779086		Gm12223
ENSMUSG00000089753	3.13435	1.49959	1.37648	1.08943	0.275962		Cd300ld2
ENSMUSG00000049103	457.025	1.4989	0.347081	4.31857	1.5704e-05	0.000314033	Ccr2
ENSMUSG00000072844	2.34653	1.49875	1.96189	0.763934	0.444906		G530011O06Rik
ENSMUSG00000113681	19.6132	1.49873	0.572523	2.61776	0.00885091	0.0406131	Gm45930
ENSMUSG00000073555	163.811	1.49821	0.695915	2.15287	0.0313291	0.104957	Gm4951
ENSMUSG00000105255	14.1419	1.49725	0.860671	1.73963	0.0819238	0.210706	Gm42413
ENSMUSG00000102961	7.87691	1.49682	1.55897	0.960132	0.336989	0.544173	Gm19918
ENSMUSG00000115405	2.22179	1.49668	1.74067	0.859826	0.389885		AC122397.2
ENSMUSG00000082380	8.89011	1.49627	0.72118	2.07475	0.0380097	0.120955	Gm12218
ENSMUSG00000076461	21.7955	1.49509	0.727476	2.05517	0.0398627	0.125239	Trbv1
ENSMUSG00000094015	16.8328	1.49397	0.520025	2.87287	0.00406756	0.0223643	Rps12-ps20
ENSMUSG00000095923	39.4054	1.4936	1.72074	0.867998	0.385395	0.59178	Ighv1-37
ENSMUSG00000049929	2.59351	1.4928	2.19402	0.680397	0.496253		Lpar4
ENSMUSG00000063388	87.9677	1.49272	0.644616	2.31567	0.0205763	0.0768517	BC023105
ENSMUSG00000103226	1.46724	1.49184	2.12213	0.702994	0.482059		Gm37732
ENSMUSG00000102764	0.616791	1.49168	5.35587	0.278514	0.780618		Gm37183
ENSMUSG00000059434	7.26833	1.49095	0.890739	1.67384	0.0941625		Gckr
ENSMUSG00000082196	30.4609	1.49086	0.502846	2.96485	0.00302835	0.0178742	Gm14231
ENSMUSG00000097698	0.627922	1.48875	5.29924	0.280937	0.778759		Gm26906
ENSMUSG00000106963	6.01893	1.48832	0.748016	1.98969	0.0466256		Gm8675
ENSMUSG00000104471	1.01251	1.48797	5.31223	0.280104	0.779398		Gm38208
ENSMUSG00000056008	0.925465	1.48754	2.96685	0.501388	0.616098		Gm11541
ENSMUSG00000107068	0.695996	1.48749	4.12846	0.360303	0.718621		Gm42742
ENSMUSG00000095294	0.913193	1.48709	4.1325	0.359852	0.718958		Gm21119
[truncated: 26,199 more rows]

## Sheet: D. Wt recovery vs Wt ut
Reference Number	baseMean	log2FoldChange	lfcSE	stat	p-value	p adj	gene name		NF-κB target genes (overlap)
ENSMUSG00000110556	0.93887	59.793	6.46787	9.24462	2.36087e-20		Gm45762		A4
ENSMUSG00000101778	0.501476	55.4414	6.44393	8.60366	7.72155e-18		Gm29488		ABCA1
ENSMUSG00000059014	0.979116	47.396	6.46472	7.3315	2.27598e-13		Gm5409		ABCB1
ENSMUSG00000040197	0.524931	43.7237	6.47976	6.74774	1.50167e-11		Cd209e		ABCB4
ENSMUSG00000113479	0.978435	41.668	6.47715	6.43308	1.25047e-10		AC068459.1		ABCB9
ENSMUSG00000030976	0.875344	39.411	6.47356	6.08799	1.14336e-09		Tex36		ABCC6
ENSMUSG00000113817	0.724225	38.673	6.45268	5.99333	2.05587e-09		Gm21056		ABCG5
ENSMUSG00000083153	1.40312	37.6804	6.31899	5.96305	2.47578e-09		Gm12459		ABCG8
ENSMUSG00000100140	0.669781	37.0848	6.47724	5.7254	1.0319e-08		Gm28789		ADH1A
ENSMUSG00000094484	0.447183	35.428	6.45125	5.49165	3.98198e-08		Gm21244		ADORA1
ENSMUSG00000111865	0.493761	34.495	6.42474	5.36909	7.91344e-08		AC153729.4		AFP
ENSMUSG00000081189	0.622591	33.2842	6.48513	5.13239	2.86085e-07		Hspd1-ps4		AGER
ENSMUSG00000097235	0.896351	32.0172	6.41189	4.9934	5.93244e-07		Gm17250		AGT
ENSMUSG00000032523	0.929766	31.7523	6.47081	4.90701	9.24772e-07		Hhatl		AHCTF1
ENSMUSG00000106897	0.56742	31.1946	6.49203	4.80506	1.54702e-06		Gm43027		AICDA
ENSMUSG00000096355	0.881891	29.0336	6.41689	4.52456	6.05209e-06		Ighv8-4		AKR1C1
ENSMUSG00000000889	1.65041	28.1953	6.48976	4.34459	1.39537e-05		Dbh		ALOX12
ENSMUSG00000076571	7.0291	28.1084	5.32313	5.28042	1.2889e-07	2.46795e-05	Igkv5-37		ALOX5
ENSMUSG00000036557	0.494895	27.8266	6.45281	4.31233	1.61545e-05		Stpg4		AMACR
ENSMUSG00000107593	0.870802	27.7025	6.4807	4.27461	1.91473e-05		Gm44097		AMF
ENSMUSG00000105629	1.47536	26.9838	5.30891	5.08275	3.72013e-07		Trav7n-5		ANGPT1
ENSMUSG00000105876	0.554851	25.4624	6.45171	3.94661	7.92644e-05		Gm43572		APHA1
ENSMUSG00000087600	0.866305	25.3668	5.64805	4.49124	7.08104e-06		Pmepa1os		APOBEC2
ENSMUSG00000104961	0.936984	25.0325	4.09347	6.11524	9.64145e-10		Gm43835		APOC3
ENSMUSG00000094131	0.618935	24.8628	6.48433	3.83429	0.000125929		Gm22265		APOD
ENSMUSG00000094066	0.665771	24.5693	5.08078	4.83574	1.32654e-06		Fam205a2		APOE
ENSMUSG00000107486	0.836185	24.4089	6.48878	3.76171	0.000168755		Trbv4		AQP4
ENSMUSG00000099532	0.511734	24.3537	6.46986	3.76418	0.000167097		Gm29098		AR
ENSMUSG00000107574	0.432879	24.2366	6.45385	3.75537	0.000173087		Gm17834		ARFRP1
ENSMUSG00000038583	2.92289	24.0216	4.71475	5.09499	3.48769e-07		Pln		ARODA2A
ENSMUSG00000070908	0.574205	23.9125	6.47521	3.69293	0.000221685		Gm13288		ART1
ENSMUSG00000058250	0.404192	23.39	6.46973	3.6153	0.000300003		Tas2r138		ASPH
ENSMUSG00000112887	0.566611	23.1275	6.48344	3.56717	0.000360862		AC155258.1		ASS1
ENSMUSG00000025328	2.05598	22.6869	6.47996	3.50109	0.000463362		Padi3		BACE1
ENSMUSG00000101603	0.730048	22.5048	4.96843	4.52955	5.91104e-06		Gm28730		BAX
ENSMUSG00000083720	0.54849	22.3714	6.4601	3.46301	0.000534169		Gm12901		BCL2A1
ENSMUSG00000081907	0.550798	22.1443	6.47295	3.42105	0.000623788		Gm13731		BCL2BCL2C11
ENSMUSG00000112112	1.85863	21.7663	5.82459	3.73697	0.00018625		AC154300.1		BCL2L1
ENSMUSG00000066153	1.01088	21.668	6.41977	3.37521	0.000737602		Mup21		BCL3
ENSMUSG00000083956	0.446291	20.7487	6.4823	3.20083	0.00137034		Gm12361		BDKRB1
ENSMUSG00000086000	0.982942	20.2177	6.48117	3.11945	0.00181191		Gm12493		BDKRB1
ENSMUSG00000078531	0.547823	20.1096	5.2693	3.81637	0.000135432		Gm831		BDNF
ENSMUSG00000081731	0.936321	20.0708	4.25271	4.71954	2.36379e-06		Calr-ps		BGN
ENSMUSG00000038602	1.95639	19.7092	3.73895	5.27132	1.35448e-07		Slc35f1		BLIMP1
ENSMUSG00000097469	0.732891	19.5175	6.49336	3.00576	0.00264915		Gm26733		BLNK
ENSMUSG00000106039	0.65825	19.3364	6.48478	2.98181	0.00286551		Iglc4		BLR1
ENSMUSG00000073938	0.75812	19.0718	4.2863	4.44948	8.60791e-06		Olfr632		BMI1
ENSMUSG00000104272	3.28235	17.681	2.37589	7.44184	9.92933e-14		Gm38297		BMP2
ENSMUSG00000074115	46212.1	17.4947	1.85049	9.4541	3.2581e-21	2.34985e-17	Saa1		BMP4
ENSMUSG00000041358	1.00347	17.3589	4.04988	4.28628	1.81694e-05		Nutm1		BNIP3
ENSMUSG00000103358	1.42091	16.5934	4.7064	3.52571	0.000422347		Gm37593		BRCA2
ENSMUSG00000076518	62.1772	16.4217	2.99292	5.48686	4.0914e-08	1.05388e-05	Igkv2-112		BTK
ENSMUSG00000092374	0.751043	16.1438	3.73934	4.31728	1.57961e-05		Gm6623		C3
ENSMUSG00000066072	1.5693	16.1004	5.4173	2.97203	0.00295838		Cyp4a10		C4BPA
ENSMUSG00000106607	0.872971	16.0227	4.89742	3.27167	0.00106914		Gm43178		C69
ENSMUSG00000094293	0.708254	15.9845	6.47631	2.46815	0.0135815		Gm3893		CALCB
ENSMUSG00000102786	4.9825	15.9539	2.2276	7.16192	7.95568e-13	2.86895e-09	Gm38252		CASP4
ENSMUSG00000074575	1.06342	15.5844	6.48803	2.40203	0.0163045		Kcng1		CAV1
ENSMUSG00000096230	0.423332	15.4758	6.45872	2.39612	0.0165699		Gm16429		CCL1
ENSMUSG00000102139	0.725545	15.3073	6.47882	2.36267	0.018144		Gm37109		CCL15
ENSMUSG00000082962	0.917908	15.244	5.02989	3.03067	0.0024401		Gm10601		CCL17
ENSMUSG00000082129	1.28235	15.2243	3.60036	4.22855	2.35207e-05		Gm14502		CCL19
ENSMUSG00000037942	1.10226	14.9952	6.48305	2.31299	0.0207234		Crp		CCL2
ENSMUSG00000029755	0.871091	14.8485	5.8096	2.55585	0.0105929		Dlx5		CCL20
ENSMUSG00000103589	0.834974	14.7636	4.17512	3.5361	0.000406085		Gm37840		CCL22
ENSMUSG00000095387	4.27712	14.7254	2.77104	5.31403	1.07229e-07		Trav6d-4		CCL23
ENSMUSG00000030359	6.83082	14.1094	4.57757	3.08228	0.00205419	0.0244132	Pzp		CCL28
ENSMUSG00000076800	0.95734	14.0297	6.48539	2.16328	0.0305194		Trav6n-5		CCL3
ENSMUSG00000097548	7.90127	13.3487	6.4658	2.06451	0.0389695	0.167968	Gm26748		CCL4
ENSMUSG00000112877	0.967551	13.3451	5.59885	2.38354	0.017147		AC174742.1		CCL5
ENSMUSG00000090574	1.57962	13.1702	3.14407	4.1889	2.80307e-05		Traj61		CXCL12
ENSMUSG00000086842	0.48564	12.7	6.48986	1.95689	0.0503601		Gm15681		CCND1
ENSMUSG00000106630	5.44121	12.5417	3.41209	3.67567	0.000237224	0.00547209	Igkv2-116		CCND2
ENSMUSG00000038408	2.25636	12.5145	4.96389	2.52111	0.0116986		1700018A04Rik		CCR5
ENSMUSG00000099075	1.306	12.3925	3.1267	3.96343	7.38795e-05		Mir7674		CCR7
ENSMUSG00000115480	1.84173	12.3756	4.16407	2.972	0.00295871		AC132833.1		CD2
ENSMUSG00000102515	1.63567	12.2499	4.23716	2.89106	0.00383942		Ighv12-2		CD209
ENSMUSG00000024223	0.789618	11.9931	4.90393	2.44561	0.0144609		Armc12		CD23
ENSMUSG00000094792	1.26969	11.9456	4.5007	2.65417	0.00795027		Trav10d		CD274
ENSMUSG00000108750	0.922378	11.8994	3.32195	3.58207	0.000340882		Gm44750		CD38
ENSMUSG00000027443	0.704428	11.8689	6.47969	1.83171	0.0669942		Cst12		CD3G
ENSMUSG00000035456	1.11066	11.7612	4.81358	2.44333	0.0145526		Prdm8		CD3G
ENSMUSG00000096551	0.771059	11.6264	6.47199	1.79641	0.0724286		Trav10		CD40
ENSMUSG00000052854	0.59203	11.3024	6.46186	1.74909	0.0802757		Nrk		CD40LG
ENSMUSG00000091722	3.23126	11.1788	6.48597	1.72354	0.0847912		Siah3		CD44
ENSMUSG00000085348	0.882103	11.0058	6.37382	1.72672	0.0842186		Myhas		CD48
ENSMUSG00000102293	0.657316	10.9722	6.47215	1.6953	0.090019		Gm37541		CD54
ENSMUSG00000027913	1.94753	10.6284	6.38344	1.665	0.0959134		Crct1		CD80
ENSMUSG00000057465	261.857	10.1681	0.956232	10.6335	2.08238e-26	4.50565e-22	Saa2		CD86
ENSMUSG00000112532	2.84792	9.5586	3.17486	3.01071	0.00260634		Gm36283		CDK6
ENSMUSG00000078688	2.3156	9.47241	6.49392	1.45866	0.144659		Mup2		CDKNIA
ENSMUSG00000107480	6.17391	9.12264	5.44255	1.67617	0.0937047	0.283288	Gm44165		CDX1
ENSMUSG00000030209	5.27807	8.79183	2.81431	3.12397	0.00178428	0.022226	Grin2b		CEBPD
ENSMUSG00000114313	0.790027	8.68744	5.11852	1.69725	0.0896486		CT009527.1		CFB
ENSMUSG00000060177	339.99	8.66706	1.39263	6.22352	4.86113e-10	3.28688e-07	Klk1b22		CFB
ENSMUSG00000101571	1.13507	8.47714	5.4586	1.55299	0.120426		Gm6187		CFLAR
ENSMUSG00000078687	1.42574	8.36366	6.49299	1.28811	0.197709		Mup8		CGM2
ENSMUSG00000096423	1.4702	7.93084	2.43954	3.25095	0.00115019		Gm24978		CHI3L1
ENSMUSG00000079639	1.73572	7.61748	4.58969	1.65969	0.0969764		Rhox4a		CIDEA
ENSMUSG00000076902	0.452271	7.61127	6.38328	1.19238	0.233114		Traj27		CLDN2
ENSMUSG00000005800	2041.93	7.48723	1.53117	4.88988	1.00898e-06	0.000110259	Mmp8		COL1A2
ENSMUSG00000060459	13.0441	7.34439	1.95929	3.7485	0.000177896	0.00443448	Kng2		CR2
ENSMUSG00000104121	0.847559	7.26431	3.80311	1.9101	0.0561206		Gm37485		CREB3
ENSMUSG00000089949	0.961934	7.08324	3.77545	1.87613	0.0606374		Gm16137		CRPHAMP
ENSMUSG00000113029	0.75428	7.06532	5.15092	1.37166	0.170169		Gm40578		CSF1
ENSMUSG00000107428	0.832884	7.04324	5.85763	1.2024	0.229207		Gm44154		CSF2
ENSMUSG00000103159	0.88081	6.78319	4.77406	1.42084	0.155362		F830112A20Rik		CSF5
ENSMUSG00000095497	15.1256	6.76717	1.90923	3.54444	0.000393441	0.00779568	Igkv1-122		CTSB
ENSMUSG00000005681	4.11811	6.76163	6.45903	1.04685	0.295169		Apoa2		CTSL
ENSMUSG00000058152	3.21164	6.73045	3.29006	2.0457	0.0407864		Chsy3		CXCL1
ENSMUSG00000073779	1.14097	6.72545	4.08143	1.64782	0.0993902		Lrp8os2		CXCL2
ENSMUSG00000015519	5.32146	6.64317	6.40717	1.03683	0.299813	0.551762	2310057J18Rik		CXCL8
ENSMUSG00000051748	514.901	6.62059	1.40452	4.71377	2.43181e-06	0.000208798	Wfdc21		CXCL10
ENSMUSG00000038541	97.9942	6.57882	1.76194	3.73384	0.000188581	0.00461575	Srd5a2		CXCL11
ENSMUSG00000079597	390.102	6.55261	1.02556	6.38929	1.66656e-10	1.33553e-07	Gm5483		CXCL3
ENSMUSG00000069721	0.852411	6.53482	6.36609	1.0265	0.304654		Krtap3-2		CXCL3
ENSMUSG00000096719	256.608	6.40916	1.40848	4.5504	5.3543e-06	0.000362564	Mrgpra2b		CXCL5
ENSMUSG00000022651	4650.6	6.29622	1.23444	5.10046	3.38831e-07	5.05606e-05	Retnlg		CXCL6
ENSMUSG00000098871	3.17909	6.22553	2.02916	3.06804	0.00215468		Mir6381		CXCL8
ENSMUSG00000114982	8.29875	6.17032	5.07493	1.21584	0.224044	0.468315	Vmn1r14		CXCL9
ENSMUSG00000026805	0.548682	6.08195	6.41164	0.948579	0.342835		Barhl1		CYP19A1
ENSMUSG00000070563	6.19225	6.07392	2.19687	2.7648	0.00569571	0.0483856	Spaca4		CYP2C11
ENSMUSG00000022902	577.884	6.05463	1.85953	3.256	0.00112994	0.0162448	Stfa2		CYP2E1
ENSMUSG00000076031	143.925	6.0279	0.917836	6.56751	5.11631e-11	6.15009e-08	Gm22751		CYP7B1
ENSMUSG00000093973	191.681	5.90313	1.55555	3.79487	0.000147719	0.0038836	Mrgpra2a		DCTN4
ENSMUSG00000059657	384.566	5.87817	0.848497	6.92774	4.27621e-12	7.71036e-09	Stfa2l1		DEFB2
ENSMUSG00000045551	412.298	5.87651	0.94775	6.20049	5.62872e-10	3.69056e-07	Fpr1		DIO1
ENSMUSG00000107082	1.23278	5.78048	2.89943	1.99366	0.0461893		Gm36378		DMP1
ENSMUSG00000064999	4.50678	5.75114	1.86591	3.08222	0.00205465	0.0244132	Gm26035		DNASE1L2
ENSMUSG00000096055	1.56218	5.67754	3.20971	1.76887	0.0769164		Trav12n-1		DPYD
ENSMUSG00000094541	5.9208	5.65795	1.6962	3.33567	0.000850947	0.0133905	Gm24089		DUSP1
ENSMUSG00000071561	875.961	5.65334	1.5062	3.75338	0.000174469	0.00437933	BC100530		E2F3
ENSMUSG00000095689	1.55318	5.61027	3.11708	1.79984	0.0718852		Trav12d-1		EGFR
ENSMUSG00000105576	3.14166	5.58143	6.4112	0.870576	0.383986		Gm42164		EGR1
ENSMUSG00000094315	6.48713	5.57983	2.49707	2.23455	0.025447	0.128574	Igkv4-78		ELF3
ENSMUSG00000079012	131.887	5.56307	1.79919	3.09198	0.00198826	0.0238953	Serpina3m		END1
ENSMUSG00000034456	1.88665	5.54857	2.82712	1.96263	0.0496897		Uroc1		ENG
ENSMUSG00000056071	20157.8	5.50862	0.982059	5.60925	2.032e-08	6.19244e-06	S100a9		ENO2
ENSMUSG00000032271	29.0338	5.49824	1.71552	3.20501	0.0013506	0.0182986	Nnmt		EPI3
ENSMUSG00000096406	4.66446	5.49157	1.95808	2.80456	0.0050385	0.0444609	Rn5s		EPO
ENSMUSG00000094262	23.4601	5.47993	1.74304	3.14389	0.0016672	0.021207	Igkv4-62		ERBB2
ENSMUSG00000095416	32.5213	5.44919	1.37333	3.96787	7.25165e-05	0.00232074	Ighv1-12		F11R
ENSMUSG00000076758	1.82787	5.42835	3.48027	1.55975	0.118819		Trav1		F3
ENSMUSG00000030158	1.64226	5.40128	2.91267	1.85441	0.0636812		Clec12b		F8
ENSMUSG00000087129	0.968915	5.38361	4.02845	1.3364	0.181419		Gm16316		FABP6
ENSMUSG00000084361	1.40281	5.38319	2.7183	1.98035	0.0476639		Gm8202		FAM148A
ENSMUSG00000062061	2.39772	5.38265	3.29853	1.63183	0.102715		Obp2a		FAS
ENSMUSG00000109462	6.39515	5.38244	6.37881	0.8438	0.398781	0.646566	Gm6334		FASLG
ENSMUSG00000095892	3.72584	5.34906	1.60973	3.32295	0.000890708		Rnu5g		FCER2
ENSMUSG00000030142	1565.64	5.34599	1.11426	4.79778	1.60437e-06	0.000160712	Clec4e		FDGRT
ENSMUSG00000087582	10.9419	5.34507	4.9283	1.08457	0.278113	0.528017	Ighv6-7		FGF8
ENSMUSG00000076548	12.9743	5.32174	2.00686	2.65178	0.00800687	0.0604693	Igkv4-69		FN1
ENSMUSG00000076761	5.56556	5.27851	1.80605	2.92268	0.00347035	0.0351371	Trav5-1		FOS
ENSMUSG00000031722	3168.57	5.24181	1.03724	5.05362	4.33521e-07	6.08211e-05	Hp		FSTL3
ENSMUSG00000110882	2.44164	5.22523	1.78432	2.92842	0.00340689		Gm7642		FTH1
ENSMUSG00000095723	5.48937	5.22064	1.68032	3.10693	0.00189039	0.0231217	Gm23647		FTH1
ENSMUSG00000030069	377.97	5.21437	1.94321	2.68337	0.00728837	0.0569103	Prok2		G6PC
ENSMUSG00000059042	2.3259	5.18676	2.07465	2.50007	0.012417		Klk1b9		G6PQ
ENSMUSG00000026691	3.67349	5.16386	3.49894	1.47583	0.139989		Fmo3		GAD1
ENSMUSG00000065773	7.05137	5.10268	1.73536	2.94041	0.00327774	0.0336754	Rnu1b6		GADD45B
ENSMUSG00000086563	10.7771	5.09533	1.98713	2.56417	0.0103422	0.071243	Platr15		GATA3
ENSMUSG00000097751	1.85688	5.08998	4.23759	1.20115	0.229693		Gm26690		GBP1
ENSMUSG00000032649	3.76823	5.08467	1.91837	2.65051	0.00803697		Colgalt2		GCLC
ENSMUSG00000068522	4.27941	5.07427	2.30823	2.19833	0.0279253		Aard		GCLC
ENSMUSG00000102333	1.55728	5.06513	4.0716	1.24402	0.213494		Gm37235		GCLM
ENSMUSG00000106403	1.34757	5.04315	6.42024	0.785507	0.432156		Igkv20-101-2		GCLM
ENSMUSG00000083700	1.52963	5.04202	2.84877	1.7699	0.0767445		Gm2986		GCNT1
ENSMUSG00000095376	4.93676	5.03605	1.73558	2.90165	0.00371198	0.0365888	Gm22109		GJB1
ENSMUSG00000094751	7.06283	5.03445	2.14807	2.34371	0.0190932	0.107026	Gm25018		GNAI2
ENSMUSG00000090356	16.6613	5.02201	1.93043	2.6015	0.00928167	0.0663235	Teddm3		GNB2L1
ENSMUSG00000094657	4.922	4.96491	1.78973	2.77411	0.00553533	0.0473953	n-R5s142		GNRH2
ENSMUSG00000040017	11.2788	4.96014	1.2287	4.03691	5.41609e-05	0.00190439	Saa4		GRIN2A
ENSMUSG00000059150	2.64898	4.95129	1.70243	2.90836	0.0036333		Rpl26-ps4		GRM2
ENSMUSG00000085333	5.68139	4.94663	2.60691	1.89751	0.0577611	0.212403	1700030A11Rik		GSTP1
ENSMUSG00000115698	1.42152	4.93738	3.62771	1.36102	0.173508		AC125087.1		GUCY1A2
ENSMUSG00000019880	8.73402	4.93293	1.92399	2.5639	0.0103502	0.0712747	Rspo3		GZMB
ENSMUSG00000024440	12.1943	4.91768	1.66335	2.95649	0.0031116	0.0324312	Pcdh12		HBE1
ENSMUSG00000050010	3.95487	4.90885	2.15805	2.27467	0.0229256		Shisa3		HBZ
ENSMUSG00000054958	250.34	4.90155	1.16031	4.22436	2.39617e-05	0.0010646	Nt5c1a		HGF
ENSMUSG00000109881	3.70585	4.89195	2.14631	2.27924	0.0226526		Gm45507		HIF1A
ENSMUSG00000095701	7.94952	4.88604	1.74649	2.79763	0.0051479	0.04515	Gm24830		HLAB
ENSMUSG00000103147	1.89497	4.88149	2.35835	2.06988	0.0384637		Gm7341		HLAG
ENSMUSG00000110251	1.52192	4.86638	2.82956	1.71984	0.0854623		Gm2996		HMGN1
ENSMUSG00000100815	1.10768	4.86384	5.39327	0.901835	0.367144		Gm29112		HMOX1
ENSMUSG00000111596	2.17906	4.8578	2.09624	2.31739	0.0204824		Gm8058		HOXA9
ENSMUSG00000098223	1.9577	4.83575	2.11786	2.28332	0.0224118		Gm4891		HPSE
ENSMUSG00000083772	3.69012	4.8174	1.47268	3.27117	0.00107103		Gm15566		HSD11B2
ENSMUSG00000095410	4.94728	4.81578	2.20218	2.18682	0.0287555	0.138571	n-R5s121		HSD17B8
ENSMUSG00000100094	68.3464	4.80685	1.85194	2.59558	0.00944307	0.067012	1810008I18Rik		HSP90AA1
ENSMUSG00000079594	125.047	4.79893	2.77906	1.72682	0.0842002	0.266117	BC117090		ICOS5
ENSMUSG00000094127	2.20574	4.79018	2.54786	1.88008	0.0600974		G530012D18Rik		IER2
ENSMUSG00000085297	2.97937	4.78791	2.94583	1.62532	0.104095		Gm11651		IER3
ENSMUSG00000094812	7.13601	4.76055	1.66999	2.85065	0.00436306	0.0402917	Gm22614		IFI44L
ENSMUSG00000082455	1.22249	4.74351	5.15895	0.919473	0.357848		Gm13665		IFNB1
ENSMUSG00000095738	3.56657	4.74245	1.90541	2.48894	0.0128123		Gm25313		IFNG
ENSMUSG00000089990	0.973412	4.71938	4.94632	0.954119	0.340023		Gm15852		IGFBP1
ENSMUSG00000110515	2.87528	4.71126	1.78117	2.64504	0.00816824		Gm9644		IGFBP3
ENSMUSG00000109706	2.1445	4.69424	2.20858	2.12546	0.0335483		Fth-ps3		IGFBP2
ENSMUSG00000030144	626	4.68873	0.728975	6.43196	1.25971e-10	1.07916e-07	Clec4d		IGHC
ENSMUSG00000062694	2.44335	4.68044	3.31856	1.41038	0.158427		Cav3		IGHE
ENSMUSG00000022181	13.3995	4.67619	1.41575	3.30297	0.000956665	0.0145361	C6		IGHG1
ENSMUSG00000085572	6.95775	4.66157	1.82041	2.56072	0.0104455	0.0717261	Gm16234		IGHG2
ENSMUSG00000108046	1.01946	4.65575	6.40229	0.727201	0.467103		Gm43924		IGHG4
ENSMUSG00000093668	0.91494	4.6427	3.55543	1.30581	0.191618		Pou5f2		IL10
ENSMUSG00000087681	0.88911	4.63401	4.81687	0.962037	0.336031		Gm13565		IL11
ENSMUSG00000050157	8.44636	4.63137	2.23322	2.07385	0.038093	0.165339	Gm867		IL12B
ENSMUSG00000003436	10.9565	4.62495	1.26844	3.64618	0.00026617	0.00598041	Dll3		IL13
ENSMUSG00000103811	2.71963	4.61717	2.11308	2.18504	0.0288857		Gm38004		IL15
ENSMUSG00000040026	18809.8	4.60276	0.896484	5.13424	2.83291e-07	4.34722e-05	Saa3		IL16
ENSMUSG00000026919	7.87902	4.6019	1.51585	3.03584	0.00239863	0.0272437	Lcn4		IL17
ENSMUSG00000043613	841.249	4.59866	1.27101	3.6181	0.000296769	0.00641478	Mmp3		IL18
ENSMUSG00000029361	9.00579	4.59307	1.81774	2.5268	0.0115106	0.076774	Nos1		IL1A
ENSMUSG00000095127	11.7484	4.59152	1.65385	2.77626	0.00549886	0.0473454	Ighv1-82		IL1B
ENSMUSG00000097458	0.643074	4.57896	6.42195	0.713017	0.475835		Gm26697		IL1RN
ENSMUSG00000114152	1.73026	4.57434	2.51548	1.81848	0.0689913		Gm5374		IL2
ENSMUSG00000094801	4.79216	4.56332	2.09484	2.17836	0.029379	0.140729	n-R5s113		IL23A
ENSMUSG00000105217	1.70638	4.54518	2.63828	1.72278	0.0849277		Gm42873		IL27
ENSMUSG00000022875	5.59312	4.53217	2.22463	2.03727	0.0416225	0.175211	Kng1		IL2RA
ENSMUSG00000113135	1.32785	4.52454	6.27752	0.720752	0.471062		AC116589.2		IL6
ENSMUSG00000095477	1.36113	4.52296	3.0534	1.48128	0.138531		Gm25076		IL8RA
ENSMUSG00000095749	2.67335	4.52111	2.37276	1.90542	0.0567251		n-R5s141		IL8RB
ENSMUSG00000094689	2.15703	4.51524	3.92099	1.15155	0.249504		Ighv1-81		IL9
ENSMUSG00000076547	91.4961	4.51179	1.17715	3.83281	0.000126688	0.00348304	Igkv4-70		INHBA
ENSMUSG00000056632	43.2939	4.51071	1.21396	3.71571	0.000202637	0.00485542	Dsg3		IRF1
ENSMUSG00000039037	15.9012	4.4901	1.82958	2.45417	0.014121	0.087471	St6galnac5		IRF2
ENSMUSG00000080918	0.978	4.47696	4.45015	1.00603	0.314403		Gm12202		IRF4
ENSMUSG00000114519	3.656	4.46181	1.56605	2.84908	0.00438465		AC161252.2		IRF7
ENSMUSG00000048699	2377.73	4.45775	0.942654	4.72893	2.25706e-06	0.000204335	Krt90		JMJD3
ENSMUSG00000106609	69.2323	4.45671	1.51879	2.93438	0.00334215	0.0341749	Gm43181		JUNB
ENSMUSG00000088549	4.83217	4.45341	2.43526	1.82872	0.0674422	0.233312	Gm24959		KC
ENSMUSG00000101662	6.10407	4.45171	1.67996	2.64989	0.00805172	0.060701	Gm28499		KCNK5
ENSMUSG00000096343	4.80569	4.44939	2.28624	1.94616	0.0516354	0.198584	n-R5s133		KCNN2
ENSMUSG00000027832	48.2628	4.44936	2.28598	1.94637	0.0516102	0.198558	Ptx3		KISS1
ENSMUSG00000111823	0.961747	4.44006	4.72769	0.939161	0.347648		Gm2517		KITLG
ENSMUSG00000038932	2.41094	4.43821	2.85719	1.55335	0.12034		Tcfl5		KLF10
ENSMUSG00000092323	0.870418	4.42921	6.47506	0.684042	0.493949		BB365896		KLK3
ENSMUSG00000092224	7.90909	4.42432	1.45258	3.04584	0.00232031	0.0265773	Gm8815		KLRA1
ENSMUSG00000091676	0.638828	4.41764	6.20137	0.712365	0.476238		Gm8374		KRT15
ENSMUSG00000083215	2.25845	4.40818	2.50778	1.7578	0.0787815		Rbmx2-ps		KRT3
ENSMUSG00000048281	1.32238	4.40482	4.47868	0.983508	0.325357		Dleu7		KRT5
ENSMUSG00000095859	1.54973	4.39918	5.0258	0.87532	0.3814		Ighv1-43		KRT6B
ENSMUSG00000064923	2.42312	4.39532	2.65564	1.65509	0.0979065		Gm22042		LAMB2
ENSMUSG00000054905	259.083	4.38973	1.74282	2.51875	0.0117771	0.0779686	Stfa3		LBP
ENSMUSG00000080941	2.16659	4.38576	2.28028	1.92334	0.054437		Gm16056		LCN2
ENSMUSG00000115387	2.03635	4.37951	1.84234	2.37714	0.0174473		AC154563.1		LEF1
ENSMUSG00000072589	1.10968	4.37375	3.15768	1.38511	0.166018		Gm10371		LGALS3
ENSMUSG00000041552	0.780765	4.36454	6.42134	0.679693	0.496699		Ptchd1		LIGP1
ENSMUSG00000082570	0.880128	4.36303	3.56704	1.22315	0.221273		Gm15711		LPIG
ENSMUSG00000094270	5.03439	4.35163	2.23187	1.94977	0.0512037	0.197768	Gm22291		LTA
ENSMUSG00000094760	6.45763	4.34296	1.88761	2.30077	0.0214047	0.114665	n-R5s139		LTB
ENSMUSG00000098588	5.50118	4.3417	1.77822	2.4416	0.0146225	0.0895242	Mir6340		LYN
ENSMUSG00000094652	3.44543	4.33903	2.03319	2.1341	0.0328343		Ighv1-42		LTF
ENSMUSG00000091550	1.06769	4.32121	3.97983	1.08578	0.277577		Gm6811		LYZ
ENSMUSG00000086153	0.732319	4.32087	6.41274	0.673795	0.500442		Gm12923		MADCAM1
ENSMUSG00000115680	1.20326	4.32018	3.7232	1.16034	0.245911		AC122035.1		MAP4K1
ENSMUSG00000099947	2.35476	4.31915	2.09577	2.06089	0.0393139		Gm28660		MBP
ENSMUSG00000089800	5.48143	4.31873	1.20744	3.57676	0.000347879	0.00720294	Rps19-ps10		MCP1
ENSMUSG00000111523	31.1986	4.31836	1.35616	3.18425	0.00145132	0.0191705	CAAA01125382.4		MDK
ENSMUSG00000076840	5.03761	4.31725	1.8033	2.39408	0.0166621	0.098057	Trav14-1		MMP1
ENSMUSG00000096170	4.99197	4.31281	2.43069	1.77431	0.0760111	0.250695	n-R5s146		MMP3
ENSMUSG00000084788	2.56892	4.30943	2.3847	1.80712	0.0707438		Gm11342		MMP9
ENSMUSG00000110730	1.05363	4.30718	6.41778	0.671132	0.502137		Gm19385		MT3
ENSMUSG00000032259	0.870252	4.30509	4.20479	1.02386	0.305904		Drd2		MTHFR
ENSMUSG00000084231	2.41788	4.30213	2.11545	2.03368	0.0419842		Gm11975		MUC2
ENSMUSG00000024798	45.6154	4.29936	1.24325	3.45815	0.000543904	0.00978476	Htr7		MX1
ENSMUSG00000095584	0.958755	4.29779	4.1909	1.02551	0.305125		Gm22628		MYB
ENSMUSG00000076550	127.14	4.28333	1.43907	2.97647	0.00291592	0.0310033	Igkv4-63		MYC
ENSMUSG00000065701	7.48432	4.27558	1.09106	3.91875	8.90104e-05	0.00269298	Rny1		MYLK
ENSMUSG00000094956	4.98013	4.27528	2.16377	1.97584	0.0481724	0.190924	n-R5s122		MYOZ1
ENSMUSG00000095580	2.29098	4.26968	2.53208	1.68624	0.09175		Rnu1b1		NCAM
ENSMUSG00000092920	47.5295	4.25938	1.08456	3.92728	8.5913e-05	0.00262142	Mirt2		NFKB1
ENSMUSG00000030732	21.9236	4.24891	1.85771	2.28718	0.0221856	0.117597	Chrdl2		NFKB1
ENSMUSG00000026180	1238.74	4.24718	1.01019	4.20436	2.61825e-05	0.00114678	Cxcr2		NFKB2
ENSMUSG00000112304	0.839463	4.24246	4.84083	0.87639	0.380818		Gm35206		NFKBIA
ENSMUSG00000096578	0.824838	4.24142	4.06716	1.04285	0.29702		Gm9529		NFKBIE
ENSMUSG00000102765	5.23386	4.23957	2.32169	1.82607	0.0678394	0.234068	Ighv1-62		NFKIZ
ENSMUSG00000105235	1.17781	4.23339	4.06949	1.04028	0.298212		Hcfc1r1-ps1		NGFB
ENSMUSG00000108950	7.6157	4.23172	1.45586	2.90668	0.00365292	0.036306	9130015G15Rik		NK4
ENSMUSG00000064952	1.63389	4.2291	2.80495	1.50773	0.131624		Gm24920		NLRP2
ENSMUSG00000115072	1.9168	4.22766	4.56244	0.926623	0.354123		Vmn1r2		NOD2
ENSMUSG00000030519	104.043	4.22278	1.94291	2.17343	0.029748	0.141775	Apba2		NOS1
ENSMUSG00000093838	15.1388	4.20678	1.56203	2.69316	0.00707791	0.0558923	Ighv3-1		NOS2A
ENSMUSG00000111131	1.59633	4.20672	2.34646	1.7928	0.0730052		9930024M15Rik		NOS2A
ENSMUSG00000094162	5.51257	4.20477	2.16119	1.94558	0.0517052	0.198745	Ccl19-ps3		NOX1
ENSMUSG00000045761	1.01832	4.19962	4.20423	0.998904	0.317841		Togaram2		NPY1R
ENSMUSG00000100014	1.61184	4.18845	2.07942	2.01424	0.0439847		Gm29290		NQO1
ENSMUSG00000102331	16.2674	4.17818	0.871994	4.79152	1.65521e-06	0.000163297	Gm19938		NR4A2
ENSMUSG00000041984	1.28083	4.1776	3.09128	1.35142	0.176562		Rptn		NRG1
ENSMUSG00000115071	0.867006	4.17634	3.71003	1.12569	0.260297		AC154843.1		NUAK2
ENSMUSG00000052270	715.752	4.17578	0.676692	6.17088	6.79126e-10	4.20258e-07	Fpr2		OLR1
ENSMUSG00000042265	1267.77	4.1703	0.767016	5.43705	5.41712e-08	1.33193e-05	Trem1		OPN1SW
ENSMUSG00000076471	10.4357	4.1657	1.8917	2.2021	0.0276584	0.135211	Trbv14		OPRD1
ENSMUSG00000081681	0.964646	4.16454	4.01744	1.03662	0.299915		Gm14868		OPRM1
ENSMUSG00000086096	3.32494	4.1584	3.60326	1.15407	0.248473		Gm12688		ORM1
ENSMUSG00000094403	145.583	4.15441	1.25244	3.31706	0.000909706	0.0139995	Mir692-2		OXTR
ENSMUSG00000061524	0.644726	4.15054	6.3848	0.650065	0.51565		Zic2		PAFAH2
ENSMUSG00000094124	13.813	4.14998	1.75165	2.36918	0.0178274	0.102615	Ighv1-74		PAX8
ENSMUSG00000094830	0.659093	4.14842	6.41836	0.646336	0.518062		n-R5s194		PDE7A
ENSMUSG00000113512	0.863455	4.14577	5.67988	0.729904	0.465449		Gm9063		PDGFB
ENSMUSG00000083016	2.44863	4.13517	1.51681	2.72623	0.00640619		Gm12618		PDYN
ENSMUSG00000014725	11.1781	4.13379	1.34732	3.06817	0.00215377	0.0251899	Adam28		PENK
ENSMUSG00000053626	4.36698	4.12666	2.36509	1.74483	0.0810151		Tll1		PGK1
ENSMUSG00000092134	3.0555	4.12268	1.91283	2.15528	0.0311403		Gm17089		PGLYRP1
ENSMUSG00000106885	1.75712	4.11305	2.17136	1.89423	0.0581942		Eif3s6-ps4		PGR
ENSMUSG00000095132	7.96401	4.10834	1.25469	3.27438	0.00105894	0.0155655	Rnu6		PI3
ENSMUSG00000096300	5.75811	4.1078	1.76092	2.33276	0.0196608	0.108965	Gm25212		PI3AP1
ENSMUSG00000094319	3.96021	4.09739	2.37754	1.72338	0.0848206		Igkv4-54		PIGF
ENSMUSG00000100486	0.812401	4.09483	4.73361	0.865055	0.387009		Gm4131		PIK3CA
ENSMUSG00000065227	7.05268	4.0944	1.35877	3.01332	0.00258407	0.0285554	Gm25790		PIM1
ENSMUSG00000115224	1.48524	4.09247	2.42682	1.68635	0.0917289		AC115735.1		PLA2
ENSMUSG00000104471	1.01251	4.0869	6.39968	0.638611	0.523076		Gm38208		PLAU
ENSMUSG00000042250	1.5723	4.08278	3.61247	1.13019	0.258396		Pglyrp4		PLGR
ENSMUSG00000092591	2.82885	4.07649	2.3387	1.74306	0.0813234		Gm20429		PLK3
ENSMUSG00000048480	6.10362	4.06938	1.95885	2.07743	0.037762	0.164487	Cxcr1		PNPN13
ENSMUSG00000054003	3.43464	4.06904	1.68224	2.41882	0.015571		Tdrd9		POMC
ENSMUSG00000022485	1.46334	4.06577	6.41735	0.633559	0.526369		Hoxc5		PPARGC1B
ENSMUSG00000037335	5.05986	4.06321	2.13215	1.90569	0.056691	0.210117	Hand1		PPP5C
ENSMUSG00000076653	3.82675	4.06089	2.0272	2.0032	0.0451559		Ighv7-2		PRF1
ENSMUSG00000076759	5.33106	4.05525	2.23034	1.81822	0.0690311	0.236109	Trav2		PRKACA
ENSMUSG00000046916	14.7814	4.05048	1.73678	2.33219	0.0196909	0.109022	Myct1		PRKCD
ENSMUSG00000084390	1.7371	4.0491	2.69755	1.50103	0.133349		Gm15425		PRKD1
ENSMUSG00000113701	48.9864	4.04635	2.0801	1.94527	0.0517424	0.198767	B230303A05Rik		PRL
ENSMUSG00000112782	5.7338	4.04098	1.38062	2.92694	0.00342315	0.0347731	Gm7940		PSMB9
ENSMUSG00000108290	0.64934	4.0403	6.41935	0.629395	0.52909		Gm44120		PSME1
ENSMUSG00000076821	4.61264	4.03922	1.91606	2.10809	0.0350234	0.157754	Trav8n-2		PSME2
ENSMUSG00000041771	1.19078	4.03581	4.418	0.913494	0.360983		Slc24a4		PTAFR
ENSMUSG00000026247	1.263	4.03567	3.9516	1.02128	0.307124		Ecel1		PTEN
ENSMUSG00000082181	0.58446	4.02866	6.42606	0.626924	0.530709		Gm12252		PTGDS
ENSMUSG00000046272	1.22672	4.02692	5.39933	0.745818	0.455778		Olfr1444		PTGES
ENSMUSG00000078365	0.846093	4.02511	5.80131	0.693827	0.487791		Mos		PTGIS
ENSMUSG00000101652	4.70576	4.02494	1.55927	2.5813	0.00984278	0.0687882	Gm6060		PTGS2
ENSMUSG00000094779	3.24455	4.02353	2.51766	1.59813	0.110015		Trav13n-2		PTHLH
ENSMUSG00000095272	3.95213	4.02135	1.53374	2.62192	0.00874352		Gm24242		PTPN1
ENSMUSG00000083332	5.30414	4.01989	1.4468	2.77847	0.00546156	0.0470992	Gm7599		PTS
ENSMUSG00000108524	2.03904	4.01986	3.28346	1.22427	0.220849		Gm44876		PYCARD
ENSMUSG00000113579	2.34153	4.01565	1.90403	2.10902	0.0349426		AC122327.2		RAG1
ENSMUSG00000044835	1.19542	4.00543	5.32119	0.752732	0.451611		Ankrd45		RAG2
ENSMUSG00000076870	0.54127	4.00381	6.42077	0.623571	0.532909		Trdj1		RBBP4
ENSMUSG00000094081	0.80967	4.00281	5.87426	0.681415	0.495609		Gm20826		RDH1
ENSMUSG00000091938	8.50283	3.99393	2.12269	1.88154	0.0598984	0.216554	Gm2564		RDH7
ENSMUSG00000084984	2.43631	3.99049	2.32542	1.71603	0.0861565		Far1os		REL
ENSMUSG00000111436	1.18455	3.98664	2.35081	1.69586	0.0899121		AC158598.1		RELB
ENSMUSG00000073028	3.62859	3.98632	2.80576	1.42076	0.155386		Igkv4-71		REV3L
ENSMUSG00000106567	7.25761	3.98058	1.91219	2.08169	0.0373708	0.163683	2010309G21Rik		RIPK2
ENSMUSG00000094198	5.16976	3.97166	2.50144	1.58775	0.112344	0.315113	Ighv1-50		S100A10
ENSMUSG00000039167	24.8182	3.96688	1.59615	2.48528	0.0129449	0.0826927	Adgrl4		S100A4
ENSMUSG00000084146	2.09505	3.9666	2.28306	1.73741	0.082315		Gm12104		S100A6
ENSMUSG00000021403	7.2842	3.96425	1.94042	2.04298	0.0410543	0.1738	Serpinb9b		SAA1
ENSMUSG00000106286	1.20608	3.96411	2.73423	1.44981	0.147111		Gm43424		SAA1
ENSMUSG00000095131	6.16997	3.96206	2.09018	1.89556	0.0580188	0.21288	n-R5s110		SAA3
ENSMUSG00000026390	99.6202	3.95851	2.30213	1.7195	0.0855242	0.268771	Marco		SAT1
ENSMUSG00000076038	143.18	3.95369	0.72435	5.45826	4.80825e-08	1.19582e-05	Gm22774		SCD4
ENSMUSG00000090709	5.02103	3.95218	1.49075	2.65114	0.00802209	0.0605209	Gm17173		SCL11A2
ENSMUSG00000098164	0.974669	3.94259	3.48263	1.13207	0.257605		Gm5493		SELE
ENSMUSG00000084948	15.9629	3.94101	1.26321	3.11984	0.00180946	0.0224234	1700061H18Rik		SELP
ENSMUSG00000106192	0.917841	3.93889	2.86482	1.37492	0.169157		Gm42818		SELS
ENSMUSG00000076670	17.6712	3.93379	2.22133	1.77092	0.0765747	0.251674	Ighv3-5		SENP2
ENSMUSG00000087281	0.771367	3.92959	6.42939	0.611192	0.541072		Gm16015		SERPINA1
ENSMUSG00000112766	2.60386	3.9269	3.68592	1.06538	0.286705		Gm40645		SERPINA2
ENSMUSG00000092251	1.17734	3.92588	3.73959	1.04982	0.293803		Trav9n-1		SERPINA3
ENSMUSG00000095260	8.26209	3.91979	1.4203	2.75984	0.00578302	0.0488588	Gm25890		SERPINB1
ENSMUSG00000076525	15.462	3.91821	2.03356	1.92677	0.0540083	0.204111	Igkv1-99		SERPINE1
ENSMUSG00000022126	1909.27	3.91712	1.08232	3.6192	0.000295509	0.00640034	Acod1		SERPINE2
ENSMUSG00000096129	4.33724	3.91162	1.88592	2.07412	0.038068		Trav12d-2		SH3BGRL
ENSMUSG00000094703	1.49198	3.9062	1.97469	1.97813	0.047914		Gm24486		SKP2
ENSMUSG00000044103	536.881	3.89798	0.90614	4.30174	1.69465e-05	0.000836169	Il1f9		SLC16A1
ENSMUSG00000096599	0.59223	3.89696	6.42065	0.606942	0.54389		n-R5s114		SLC3A2
ENSMUSG00000028172	0.837349	3.89649	6.42855	0.606123	0.544433		Tacr3		SLC6A6
ENSMUSG00000095791	1.46053	3.89608	2.72638	1.42903	0.152995		Gm26295		SLFN2
ENSMUSG00000096531	4.29721	3.89433	1.89009	2.0604	0.0393607		Trav12n-2		SNAI1
ENSMUSG00000073386	56.1548	3.89192	1.4791	2.63128	0.00850646	0.0627436	9830107B12Rik		SOD1
ENSMUSG00000097076	2.23854	3.88775	4.10115	0.947966	0.343147		Platr7		SOD2
ENSMUSG00000098043	0.442608	3.88691	6.42959	0.604535	0.545488		Gm26980		SOX9
ENSMUSG00000113431	14.4567	3.8821	0.893843	4.34315	1.40454e-05	0.000727706	Gm6722		SPATA19
ENSMUSG00000080718	3.01743	3.88182	1.65361	2.34749	0.0189005		Gm8019		SPI1
ENSMUSG00000082532	4.16971	3.87983	2.13574	1.81662	0.0692755		Rpl31-ps6		SPP1
ENSMUSG00000091227	0.554396	3.87964	6.42625	0.603718	0.546031		Gm3755		ST6GAL1
ENSMUSG00000093893	5.20403	3.8786	2.16762	1.78933	0.0735613	0.24517	n-R5s124		ST8SIA1
ENSMUSG00000109684	2.62835	3.87682	3.01617	1.28535	0.198671		Gm45745		SUPV3L1
ENSMUSG00000043939	75.1482	3.87639	1.06283	3.64725	0.000265066	0.00596178	A530064D06Rik		SZAT5A
ENSMUSG00000100090	1.26513	3.87531	2.56079	1.51333	0.130197		Gm29199		TACR1
ENSMUSG00000027399	759.27	3.87421	1.0358	3.7403	0.000183803	0.00451927	Il1a		TAP1
ENSMUSG00000045381	3.38023	3.87188	1.98574	1.94985	0.0511944		Olfr433		TAPBP
ENSMUSG00000021750	8.83247	3.87051	2.03226	1.90453	0.0568408	0.210449	Fam107a		TCRB
ENSMUSG00000080350	1.62743	3.86938	2.36331	1.63727	0.101574		Gm26248		TERT
ENSMUSG00000112683	2.03564	3.86796	2.14909	1.79981	0.0718899		Gm18904		TFEC
ENSMUSG00000085183	1.01165	3.86582	4.74034	0.815514	0.414778		Gm12603		TFF3
ENSMUSG00000085132	2.83229	3.86408	2.16915	1.78138	0.0748508		Gm12265		TFPI2
ENSMUSG00000101199	2.80256	3.86371	1.6071	2.40415	0.0162102		Gm9687		TGM1
ENSMUSG00000064156	0.535592	3.86328	6.42676	0.601125	0.547757		Prol1		THBS1
ENSMUSG00000100767	0.503295	3.85961	6.39837	0.603217	0.546364		Gm3508		THBS2
ENSMUSG00000100769	1.97477	3.85796	4.64919	0.829814	0.406644		Gm28893		TICAM1
ENSMUSG00000016982	0.951386	3.85771	3.81962	1.00997	0.312509		Pom121l2		TIFA
ENSMUSG00000101880	1.01877	3.85524	3.19555	1.20644	0.227647		Gm29282		TLR9
ENSMUSG00000084012	1.54071	3.85402	2.014	1.91361	0.0556695		Gm11956		TNC
ENSMUSG00000095056	5.08598	3.85279	1.57225	2.45049	0.014266	0.088117	Gm3159		TNF
ENSMUSG00000083262	2.73213	3.85269	2.60038	1.48158	0.138451		Gm14470		TNFAIP2
ENSMUSG00000046093	41.7837	3.85031	0.722852	5.32656	1.00091e-07	2.06255e-05	Hpcal4		TNFAIP3
ENSMUSG00000097175	4.09356	3.85006	2.07094	1.85908	0.0630154		Gm27018		TNFRSF4
ENSMUSG00000082912	1.39482	3.84869	3.83064	1.00471	0.315035		Gm8770		TNFRSF9
ENSMUSG00000099663	4.22194	3.84646	1.62485	2.36727	0.0179197		Gm29201		TNFSF10
ENSMUSG00000093548	2.47586	3.84578	2.2531	1.70688	0.0878439		Gm6407		TNFSF13B
ENSMUSG00000053687	1.15192	3.8454	5.22651	0.735748	0.461884		Dpep2		TNFSF13B
ENSMUSG00000076476	7.89462	3.8453	1.70496	2.25536	0.024111	0.124271	Trbv20		TNFSF15
ENSMUSG00000089657	8.25869	3.84161	1.57223	2.44342	0.0145489	0.0892781	Gm16585		TNFSFRF1B
ENSMUSG00000112317	3.78172	3.8318	1.846	2.07573	0.0379192		AC153526.2		TNIP1
ENSMUSG00000081751	11.8111	3.82769	0.902803	4.23979	2.23734e-05	0.001017	Gm14251		TNIP3
ENSMUSG00000082902	3.66826	3.82342	3.11002	1.22939	0.218927		Ccl19-ps1		TRAF1
ENSMUSG00000114036	2.70454	3.81902	1.85347	2.06047	0.0393533		AC124426.2		TRAF2
ENSMUSG00000055030	2.20352	3.81841	1.96273	1.94546	0.0517199		Sprr2e		TREM1
ENSMUSG00000043999	1.94412	3.8133	2.68434	1.42057	0.155441		Gpr75		TRP53
ENSMUSG00000032487	1795.19	3.81109	1.2693	3.00253	0.00267748	0.0291705	Ptgs2		TRPC1
ENSMUSG00000070900	1.9805	3.81033	1.87173	2.03573	0.0417778		Gm10306		TWIST1
ENSMUSG00000093816	4.4182	3.80547	2.17973	1.74584	0.0808385	0.259511	Gm26445		UCP2
ENSMUSG00000078759	3.1243	3.80451	2.27402	1.67304	0.0943202		Scgb1b7		UGCGL1
ENSMUSG00000097685	0.764712	3.80379	4.14039	0.918704	0.35825		Gm26646		UPK1B
ENSMUSG00000050366	1.0702	3.80266	6.4314	0.591264	0.554343		Olfr524		UPP1
ENSMUSG00000115757	0.782373	3.79844	6.41003	0.592578	0.553464		AC163646.4		VCAM1
ENSMUSG00000078757	2.9004	3.79836	2.19323	1.73185	0.0832995		Scgb1b29		VEGFC
ENSMUSG00000090001	2.59721	3.79757	1.70324	2.22961	0.0257733		Gm9719		VIM
ENSMUSG00000097176	3.41636	3.79629	1.80426	2.10406	0.0353728		Gm26830		VPS53
ENSMUSG00000067878	6.89214	3.79512	1.49901	2.53176	0.0113492	0.0759786	Map7d3		WERVWE1
ENSMUSG00000099568	1.11362	3.79181	2.00408	1.89205	0.058485		Gm28513		WNT10B
ENSMUSG00000112307	1.3139	3.78922	3.72882	1.0162	0.309535		AC112274.1		WT1
ENSMUSG00000096633	3.69524	3.78611	1.55903	2.42851	0.0151612		Gm22170		XDH
ENSMUSG00000114380	1.92947	3.78415	2.0275	1.86641	0.0619839		AC154454.1		XIAP
ENSMUSG00000083281	1.9057	3.78275	2.21068	1.71112	0.0870581		Gm13332		YY1
ENSMUSG00000095966	5.47299	3.77625	1.99449	1.89334	0.0583128	0.213488	n-R5s105		ZNF366
ENSMUSG00000021335	0.52377	3.77594	6.43225	0.587033	0.557182		Slc17a1
ENSMUSG00000095752	1.4413	3.77573	2.34326	1.61131	0.107112		Gm24182
ENSMUSG00000022886	72.4144	3.77519	0.640951	5.88998	3.86242e-09	1.54761e-06	Prl2a1
ENSMUSG00000021091	2098.54	3.77416	0.920599	4.09968	4.13715e-05	0.00158716	Serpina3n
ENSMUSG00000095489	0.83401	3.77416	4.01193	0.940736	0.34684		Gm25737
ENSMUSG00000102196	6.47264	3.77156	2.11859	1.78022	0.07504	0.248681	Gm38171
ENSMUSG00000093262	2.32859	3.75327	1.75849	2.13436	0.032813		Gm23413
ENSMUSG00000086862	7.92915	3.75128	1.60647	2.33511	0.0195375	0.108588	Gm13546
ENSMUSG00000048215	10.5159	3.7469	1.91865	1.95288	0.0508337	0.197089	A630023P12Rik
ENSMUSG00000100398	1.14639	3.73011	6.43612	0.57956	0.562212		Gm5251
ENSMUSG00000095025	1.68137	3.72722	3.19318	1.16725	0.243111		Gm24018
ENSMUSG00000097686	0.557517	3.72573	4.44892	0.837446	0.402342		Gm26647
ENSMUSG00000096528	15.0573	3.72565	1.40895	2.64428	0.00818658	0.0613554	G430049J08Rik
ENSMUSG00000076534	9.95037	3.72537	2.04983	1.8174	0.069156	0.236141	Igkv12-89
ENSMUSG00000081100	2.84956	3.7204	1.73099	2.14929	0.0316113		Gm14630
ENSMUSG00000085941	3.59594	3.72035	1.74876	2.12743	0.0333848		Gm11201
ENSMUSG00000108319	0.829281	3.71919	5.84215	0.636613	0.524377		Gm44552
ENSMUSG00000076604	2.52363	3.7191	4.18526	0.888618	0.374209		Igkj1
ENSMUSG00000096838	7.63425	3.71639	1.53873	2.41523	0.0157253	0.094121	Gm26232
ENSMUSG00000095737	10.2051	3.71485	2.09672	1.77174	0.0764373	0.251476	Igkv11-125
ENSMUSG00000115044	1.04216	3.71348	3.011	1.2333	0.217463		CT573086.2
ENSMUSG00000001656	0.509945	3.71318	6.42826	0.577633	0.563512		Hoxc11
ENSMUSG00000085316	1.34007	3.70831	6.4161	0.577969	0.563285		D330050G23Rik
ENSMUSG00000108915	0.881361	3.70797	4.19405	0.884103	0.376641		Gm44966
ENSMUSG00000112371	0.720188	3.70348	4.9855	0.742851	0.457572		Gm7791
ENSMUSG00000027398	8665.33	3.70061	0.762348	4.85423	1.20856e-06	0.00012694	Il1b
ENSMUSG00000025321	100.021	3.69776	0.71611	5.16367	2.4215e-07	3.97714e-05	Itgb8
ENSMUSG00000097701	0.886398	3.69591	4.78465	0.772452	0.439847		Gm17508
ENSMUSG00000104245	0.915604	3.69564	4.86652	0.759401	0.447613		Gm38155
ENSMUSG00000043441	0.624783	3.69299	6.42957	0.574376	0.565714		Gpr149
ENSMUSG00000106283	1.83381	3.69222	2.20599	1.67372	0.0941854		Rpl7a-ps2
ENSMUSG00000108935	0.851986	3.68845	4.64792	0.79357	0.427446		4930588G17Rik
ENSMUSG00000102908	5.68536	3.6873	1.17696	3.1329	0.0017309	0.0217732	Gm7558
ENSMUSG00000034209	2.6412	3.68281	2.06584	1.78272	0.074632		Rasl10a
ENSMUSG00000098900	2.76119	3.68188	1.83922	2.00187	0.0452987		Gm18190
ENSMUSG00000105134	3.45988	3.67852	1.85831	1.9795	0.0477597		Gm42923
ENSMUSG00000078252	1.31088	3.67709	3.58382	1.02602	0.304881		Krtap17-1
ENSMUSG00000094345	62.4742	3.67655	2.02607	1.81462	0.0695818	0.236944	Igkv14-126
ENSMUSG00000005980	4.75042	3.6737	1.47642	2.48825	0.0128373	0.0823482	Dnase1
ENSMUSG00000097329	0.65153	3.67366	6.43025	0.571309	0.56779		4931403G20Rik
ENSMUSG00000081524	9.4824	3.67232	1.04255	3.52242	0.000427622	0.0082759	Gm11658
ENSMUSG00000114977	1.96207	3.66451	2.78762	1.31457	0.188656		AC156016.1
ENSMUSG00000039745	1322.87	3.66198	0.474909	7.7109	1.24933e-14	5.40635e-11	Htatip2
ENSMUSG00000025479	32.1518	3.66118	1.29406	2.82923	0.00466609	0.0421194	Cyp2e1
ENSMUSG00000081005	4.75382	3.65989	1.41105	2.59373	0.00949407	0.0672341	Gm13198
ENSMUSG00000078308	8.96617	3.65701	1.42875	2.55958	0.01048	0.0718934	CT030181.1
ENSMUSG00000076538	98.842	3.65522	0.782453	4.67149	2.99017e-06	0.000240874	Igkv13-84
ENSMUSG00000061815	42.5045	3.65469	0.898528	4.06742	4.75373e-05	0.00174038	Rufy4
ENSMUSG00000046085	0.94718	3.65365	4.72833	0.772715	0.439691		4931422A03Rik
ENSMUSG00000101746	1.47007	3.65268	4.16713	0.876546	0.380733		2310043L19Rik
ENSMUSG00000113767	4.60887	3.64706	1.73548	2.10147	0.0355993	0.159046	AC120540.2
ENSMUSG00000106073	3.58769	3.64623	1.84181	1.9797	0.0477378		Gm42892
ENSMUSG00000096132	0.61077	3.64529	6.41689	0.568078	0.569982		n-R5s119
ENSMUSG00000041324	282.279	3.64252	0.813027	4.48019	7.45772e-06	0.000458417	Inhba
ENSMUSG00000111342	0.963173	3.64135	5.76845	0.631252	0.527876		4933404K13Rik
ENSMUSG00000096765	6.09906	3.63658	1.59943	2.27368	0.0229853	0.120158	n-R5s144
ENSMUSG00000046178	1.51428	3.63282	2.71515	1.33798	0.180902		Nxph1
ENSMUSG00000102221	0.638151	3.6322	6.47277	0.561151	0.574695		Gm37301
ENSMUSG00000103105	1.10286	3.6276	4.1428	0.875639	0.381226		Gm18752
ENSMUSG00000079177	0.985523	3.62542	3.0014	1.20791	0.227082		Fam228a
ENSMUSG00000006221	6.7394	3.62513	1.8406	1.96954	0.0488915	0.192549	Hspb7
ENSMUSG00000086381	2.80015	3.62445	2.85419	1.26987	0.20413		AV064505
ENSMUSG00000070388	1.43563	3.62429	3.0215	1.1995	0.230335		Fbxo39
ENSMUSG00000088532	2.67513	3.61645	1.74822	2.06865	0.0385794		Gm22706
ENSMUSG00000094075	17.0167	3.61545	1.30743	2.7653	0.00568706	0.0483501	Ighv1-80
ENSMUSG00000097331	12.5773	3.61292	1.75321	2.06074	0.0393277	0.168906	F420014N23Rik
ENSMUSG00000027824	0.70169	3.61257	6.10525	0.591715	0.554041		Vmn2r1
ENSMUSG00000082248	0.927628	3.60798	3.40506	1.05959	0.289329		Gm13161
ENSMUSG00000030218	278.771	3.606	0.943068	3.82369	0.000131467	0.00357071	Mgp
ENSMUSG00000086671	0.512219	3.60554	6.42405	0.561256	0.574623		Gm13618
ENSMUSG00000078122	34.7745	3.60371	0.692432	5.20443	1.94596e-07	3.42316e-05	F630028O10Rik
ENSMUSG00000049691	0.851679	3.5976	6.43163	0.559361	0.575916		Nkx3-2
ENSMUSG00000027977	1.03233	3.59658	5.33791	0.673781	0.50045		Ndst3
ENSMUSG00000091401	3.57177	3.5961	1.77325	2.02797	0.042563		Gm9252
ENSMUSG00000096335	3.49635	3.59424	2.0645	1.74097	0.0816883		n-R5s108
ENSMUSG00000102413	0.577426	3.59237	6.42289	0.559307	0.575952		Gm36937
ENSMUSG00000095232	0.479893	3.59199	6.43063	0.558576	0.576451		Scgb1b19
ENSMUSG00000097090	1.66512	3.58883	5.77298	0.621661	0.534165		Gm26724
ENSMUSG00000113402	1.26058	3.58746	6.41679	0.559074	0.576111		Gm40848
ENSMUSG00000042501	2.25149	3.58743	5.71408	0.627824	0.530119		Cpa6
ENSMUSG00000026894	0.479806	3.58708	6.43139	0.557747	0.577017		Morn5
ENSMUSG00000093489	1.38442	3.58636	2.00123	1.79208	0.0731207		Gm20625
ENSMUSG00000105828	1.19105	3.58521	3.68345	0.973328	0.33039		Gm43048
ENSMUSG00000024729	0.726695	3.5803	6.01294	0.595433	0.551554		1700017D01Rik
ENSMUSG00000095857	0.769916	3.57553	3.34219	1.06982	0.284702		Gm22618
ENSMUSG00000095620	14.3731	3.5745	1.99575	1.79105	0.0732849	0.244559	2010005H15Rik
ENSMUSG00000112581	0.826071	3.56988	4.95256	0.720816	0.471023		1700022H01Rik
ENSMUSG00000102269	1.34436	3.56096	3.23964	1.09918	0.271688		Gm7357
ENSMUSG00000098068	1.09967	3.55758	2.91184	1.22176	0.221798		Gm7909
ENSMUSG00000095453	5.65271	3.55467	2.18501	1.62684	0.103771	0.301279	n-R5s149
ENSMUSG00000106038	0.94247	3.54958	5.34499	0.664094	0.50663		Gm4962
ENSMUSG00000109624	8.59749	3.54693	1.3086	2.71048	0.00671853	0.0540325	Saa-ps
ENSMUSG00000074505	0.541409	3.54228	6.44255	0.549826	0.582439		Fat3
ENSMUSG00000051920	2.45333	3.54213	6.41566	0.552107	0.580875		Rspo2
ENSMUSG00000082976	213.857	3.54002	1.27438	2.77784	0.00547214	0.0471716	Gm15056
ENSMUSG00000095633	90.4168	3.53837	1.18958	2.97447	0.00293498	0.0311447	Igkv4-58
ENSMUSG00000090675	2.16318	3.53317	2.49211	1.41774	0.156266		Olfr111
ENSMUSG00000077549	5.50141	3.53292	1.67493	2.10929	0.0349196	0.15767	Snord71
ENSMUSG00000070719	1.07887	3.531	3.23121	1.09278	0.27449		Pla2g4d
ENSMUSG00000107413	0.423119	3.52934	6.43583	0.54839	0.583424		Gm20553
ENSMUSG00000105083	1.01798	3.52633	5.60693	0.628924	0.529399		Gm42699
ENSMUSG00000100788	2.02645	3.52369	1.7777	1.98216	0.047461		Gm21122
ENSMUSG00000092218	1.34011	3.52184	3.91716	0.899078	0.368611		Gm20529
ENSMUSG00000085178	6.2657	3.51909	1.95262	1.80224	0.0715081	0.241226	Kdm6bos
ENSMUSG00000086791	14.8358	3.5153	1.17128	3.00124	0.00268884	0.0292648	Gm12147
ENSMUSG00000068696	6.05729	3.5127	1.87607	1.87237	0.0611551	0.219372	Gpr88
ENSMUSG00000027070	8.59269	3.50867	1.85362	1.89288	0.0583742	0.213577	Lrp2
ENSMUSG00000107955	0.801158	3.5074	5.82935	0.601679	0.547388		Gm44027
ENSMUSG00000087121	4.01833	3.50675	1.38785	2.52675	0.0115125		Gm7847
ENSMUSG00000106040	2.19776	3.50505	2.93714	1.19335	0.232731		Cyp3a63-ps
ENSMUSG00000101402	0.924339	3.50412	5.78187	0.606053	0.54448		Gm28673
ENSMUSG00000084629	0.679527	3.50295	6.42418	0.545275	0.585564		Gm25112
ENSMUSG00000087037	1.1233	3.49859	3.99777	0.875137	0.3815		4930432L08Rik
ENSMUSG00000112936	1.34364	3.49548	3.38375	1.03302	0.301595		Gm33958
ENSMUSG00000027702	2.59345	3.49504	2.65832	1.31476	0.188591		Lrrc34
ENSMUSG00000105148	0.837734	3.49465	4.85207	0.720238	0.471379		Gm42700
ENSMUSG00000103391	1.40251	3.4934	3.62962	0.962469	0.335814		Gm38302
ENSMUSG00000088378	1.54103	3.48741	3.77916	0.9228	0.356111		Gm25184
ENSMUSG00000084124	3.54635	3.48665	1.73703	2.00725	0.0447232		Gm13588
ENSMUSG00000054215	39.2106	3.48665	1.49882	2.32626	0.0200049	0.109999	Sprr2k
ENSMUSG00000037159	11.6969	3.48349	1.39261	2.50141	0.0123698	0.08035	Wee2
ENSMUSG00000101113	1.00109	3.47753	4.61925	0.752834	0.451549		1700025B11Rik
ENSMUSG00000097770	0.467282	3.47504	6.44152	0.539475	0.589559		Gm26776
ENSMUSG00000113308	4.92516	3.47461	1.4673	2.36803	0.0178833	0.102902	CT030166.3
ENSMUSG00000086907	1.2231	3.47454	3.90675	0.88937	0.373804		Gm15298
ENSMUSG00000108502	3.87591	3.46692	1.33324	2.60036	0.00931253		Gm9240
ENSMUSG00000095600	8.29111	3.46601	0.902574	3.84014	0.000122966	0.00339364	Gm9457
ENSMUSG00000027961	3.1027	3.46316	1.94367	1.78176	0.0747881		Lrrc39
ENSMUSG00000076474	22.085	3.46301	1.14948	3.01266	0.00258965	0.0285818	Trbv17
ENSMUSG00000114605	5.62053	3.46296	1.55157	2.23191	0.025621	0.129068	AC154548.1
ENSMUSG00000114728	1.26058	3.46277	2.22647	1.55527	0.119881		AC154840.1
ENSMUSG00000072849	2.46509	3.45709	3.55978	0.971153	0.331472		Serpina1e
ENSMUSG00000045502	392.088	3.45336	1.07128	3.22359	0.00126593	0.0175574	Hcar2
ENSMUSG00000075286	0.551062	3.45324	6.43726	0.536445	0.591651		Gm1968
ENSMUSG00000063234	150.868	3.45301	0.809808	4.26398	2.00816e-05	0.000944579	Gpr84
ENSMUSG00000079852	4.27439	3.45109	1.84426	1.87126	0.0613088		Klra4
ENSMUSG00000083072	1.07406	3.44913	2.9106	1.18502	0.236008		Gm13668
ENSMUSG00000032537	2.54789	3.44894	2.09309	1.64777	0.0993993		Ephb1
ENSMUSG00000097315	2.72746	3.44886	2.18355	1.57947	0.114227		Gm26568
ENSMUSG00000032680	6.7414	3.44305	1.44169	2.3882	0.0169309	0.0991163	6820408C15Rik
ENSMUSG00000096415	1.45807	3.43908	2.34753	1.46498	0.142926		Gm24722
ENSMUSG00000087277	1.05361	3.43847	6.42937	0.534806	0.592784		2010013B24Rik
ENSMUSG00000057899	1.05419	3.43738	3.70362	0.928114	0.353348		Adgrf2
ENSMUSG00000108888	1.35004	3.43699	3.06205	1.12245	0.261671		Gm45231
ENSMUSG00000078780	78.5157	3.43619	1.00063	3.43401	0.000594717	0.0104164	Gm5150
ENSMUSG00000095183	6.35358	3.43547	1.61375	2.12888	0.0332646	0.15277	n-R5s138
ENSMUSG00000115326	60.6887	3.43229	0.508958	6.74377	1.5433e-11	2.19198e-08	AC125328.1
ENSMUSG00000081619	0.954967	3.43211	3.08456	1.11267	0.265848		Gm13351
ENSMUSG00000113060	1.45797	3.43191	5.22494	0.656833	0.511288		AC166341.2
ENSMUSG00000076541	77.6474	3.43099	1.32327	2.59282	0.00951917	0.0673533	Igkv4-79
ENSMUSG00000097913	1.86628	3.42982	3.28454	1.04423	0.296379		Gm26837
ENSMUSG00000113495	0.98481	3.42752	2.86408	1.19673	0.231413		Gm19792
ENSMUSG00000103050	0.486366	3.42407	6.42974	0.532537	0.594354		Gm38273
ENSMUSG00000029656	1.40677	3.42276	3.58881	0.95373	0.34022		C8b
ENSMUSG00000114006	0.655594	3.42102	6.42581	0.532388	0.594457		AC134462.1
ENSMUSG00000095210	30.1968	3.41716	1.57097	2.17519	0.0296156	0.141588	Ighv5-9-1
ENSMUSG00000084748	0.692137	3.4163	6.00025	0.569359	0.569112		Gm25289
ENSMUSG00000105244	1.28215	3.41525	4.38706	0.778483	0.436284		Gm5281
ENSMUSG00000087113	20.5949	3.41434	1.27332	2.68144	0.00733055	0.0571572	Gm11714
ENSMUSG00000002459	6.37557	3.41411	1.72668	1.97727	0.0480107	0.19054	Rgs20
ENSMUSG00000108844	1.42665	3.4134	2.12425	1.60687	0.108082		Gm6702
ENSMUSG00000094249	1.44015	3.41056	2.95526	1.15407	0.248473		Gm20091
ENSMUSG00000108205	0.811097	3.41013	4.88183	0.698535	0.484843		Gm19252
ENSMUSG00000022382	2.14922	3.40697	2.99547	1.13738	0.255381		Wnt7b
ENSMUSG00000114766	2.03032	3.40234	2.04279	1.66553	0.0958064		AC154724.1
ENSMUSG00000109125	1.30178	3.39925	3.23869	1.04957	0.293914		Gm45159
ENSMUSG00000096150	3.32149	3.39853	3.22363	1.05426	0.291766		Ighv1-85
ENSMUSG00000094087	18.8815	3.3984	1.56133	2.1766	0.0295106	0.141265	Ighv1-61
ENSMUSG00000108976	2.17848	3.39721	1.63514	2.07763	0.0377434		Gm29797
ENSMUSG00000100371	1.96898	3.39271	2.2515	1.50687	0.131845		Gm29669
ENSMUSG00000080895	3.3017	3.39158	1.63098	2.07947	0.0375744		Gm11645
ENSMUSG00000096895	0.829401	3.39028	5.22107	0.649346	0.516115		Gm25245
ENSMUSG00000021680	5.96032	3.38883	1.87808	1.80441	0.0711663	0.240485	Crhbp
ENSMUSG00000091194	2.59442	3.38765	1.62157	2.08912	0.0366971		Gm19840
ENSMUSG00000099849	0.595373	3.38676	6.43497	0.526306	0.598675		Gm29274
ENSMUSG00000107030	1.26939	3.38556	3.57326	0.947471	0.343399		Gm5291
ENSMUSG00000047220	8.57779	3.38388	1.39846	2.41972	0.0155325	0.0932251	Ccdc36
ENSMUSG00000105422	0.607008	3.38053	6.16511	0.548332	0.583464		Gm6089
ENSMUSG00000080530	2.74871	3.37752	1.85605	1.81973	0.0688		Gm25540
ENSMUSG00000086935	0.823833	3.37747	4.85067	0.69629	0.486247		Gm15956
ENSMUSG00000082468	0.435296	3.37664	6.43063	0.525088	0.599522		Gm12980
ENSMUSG00000114988	1.71798	3.37415	4.18493	0.806263	0.420091		AC164302.1
ENSMUSG00000028487	6.68818	3.37222	1.62344	2.07721	0.0377826	0.164487	Bnc2
ENSMUSG00000040809	1772.08	3.37178	1.38516	2.43421	0.0149244	0.0907074	Chil3
ENSMUSG00000091311	2.92126	3.3717	2.55551	1.31938	0.187041		Spata31d1b
ENSMUSG00000108493	4.62147	3.37062	1.63524	2.06124	0.0392804	0.168868	Gm45715
ENSMUSG00000076578	52.5914	3.36808	1.16793	2.88382	0.00392889	0.0377411	Igkv6-29
ENSMUSG00000054406	1.08598	3.36724	4.80557	0.700695	0.483493		Olfr411
ENSMUSG00000104166	2.95948	3.36571	1.92735	1.74629	0.0807607		Gm38247
ENSMUSG00000107831	0.790017	3.36285	4.11739	0.816742	0.414076		Gm44420
ENSMUSG00000056880	15.5559	3.35809	1.13271	2.96466	0.00303022	0.0318896	Gadl1
ENSMUSG00000102732	1.65321	3.35609	5.09078	0.659249	0.509736		Gm37342
ENSMUSG00000107768	12.4124	3.35568	1.76384	1.90248	0.0571081	0.211006	Gm44275
ENSMUSG00000101745	0.465713	3.35152	6.43553	0.520784	0.602518		Gm28764
ENSMUSG00000111489	0.588974	3.34832	6.45605	0.518633	0.604017		1700019J19Rik
ENSMUSG00000097578	0.903539	3.34435	6.43698	0.519552	0.603376		Gm26798
ENSMUSG00000111729	1.8733	3.34429	2.48585	1.34533	0.17852		AC131777.1
ENSMUSG00000094215	0.548741	3.34353	6.41968	0.520825	0.602488		Gm6489
ENSMUSG00000102335	0.480607	3.34337	6.43435	0.519613	0.603334		Gm37231
ENSMUSG00000045027	669.536	3.33977	0.923597	3.61605	0.000299134	0.00645944	Prss22
ENSMUSG00000109137	2.76001	3.33934	2.06345	1.61832	0.105593		Gm34908
ENSMUSG00000106248	1.69481	3.33813	2.20294	1.51531	0.129695		Gm9728
ENSMUSG00000083306	7.08921	3.33413	1.3657	2.44133	0.0146333	0.0895242	Gm13868
ENSMUSG00000028583	98.9746	3.33024	0.879001	3.78867	0.000151458	0.00392939	Pdpn
ENSMUSG00000031073	1.4349	3.32585	2.52901	1.31508	0.188483		Fgf15
ENSMUSG00000096168	4.81052	3.32536	2.20971	1.50489	0.132354	0.346113	Trav5n-4
ENSMUSG00000076514	87.2556	3.32299	1.45538	2.28325	0.0224159	0.118267	Igkv17-121
ENSMUSG00000059089	510.577	3.32156	0.606622	5.4755	4.36278e-08	1.09764e-05	Fcgr4
ENSMUSG00000030117	4.6789	3.32133	1.49467	2.22212	0.0262755	0.131178	Gdf3
ENSMUSG00000059867	0.741664	3.32081	4.07916	0.814092	0.415592		Olfr960
ENSMUSG00000066513	36.1566	3.31931	0.879276	3.77505	0.000159975	0.00409146	Klk1b4
ENSMUSG00000115746	1.40108	3.31787	2.56353	1.29426	0.195576		AC165154.2
ENSMUSG00000066009	1.4977	3.31535	2.93143	1.13097	0.258069		Zfp987
ENSMUSG00000097052	0.647291	3.31282	4.26559	0.776639	0.437372		Snhg7
ENSMUSG00000107724	2.6515	3.30738	1.65515	1.99823	0.0456915		Gm16042
ENSMUSG00000088359	5.50341	3.30492	1.75009	1.88843	0.0589681	0.214861	Gm24009
ENSMUSG00000096980	18.8838	3.30432	0.964843	3.42472	0.000615437	0.0106786	Gm26526
ENSMUSG00000082357	1.74091	3.30309	2.28938	1.44279	0.14908		Gm13542
ENSMUSG00000110657	4.13243	3.30151	1.46587	2.25226	0.0243059		Gm7684
ENSMUSG00000052749	112.946	3.30104	0.817455	4.03819	5.38649e-05	0.00189817	Trim30b
ENSMUSG00000092805	5.73358	3.30048	1.45291	2.27164	0.0231083	0.120539	Gm26461
ENSMUSG00000107835	2.84549	3.29406	1.86753	1.76385	0.0777566		Gm43999
ENSMUSG00000111173	1.56778	3.29293	2.13451	1.54271	0.122901		AC153561.1
ENSMUSG00000109735	1.24511	3.29247	4.57007	0.720441	0.471253		Gm45667
ENSMUSG00000023000	4.13388	3.29123	2.67693	1.22948	0.218892		Dhh
ENSMUSG00000096678	2.69663	3.29096	2.42766	1.35561	0.175223		Trav9-4
ENSMUSG00000082398	0.674594	3.28807	6.43843	0.510694	0.609565		Gm11927
ENSMUSG00000108362	1.40677	3.28423	3.11011	1.05599	0.290975		Gm18561
ENSMUSG00000100141	4.31448	3.28279	1.47915	2.21938	0.026461		Gm6445
ENSMUSG00000085066	2.82994	3.28235	1.88278	1.74336	0.0812712		Gm4989
ENSMUSG00000080478	1.52007	3.28219	2.11062	1.55508	0.119926		Snord23
ENSMUSG00000107846	1.3497	3.28089	2.58853	1.26747	0.204987		Gm43963
ENSMUSG00000040660	0.505198	3.2806	6.42452	0.510637	0.609605		Cyp2b9
ENSMUSG00000083076	1.47831	3.27983	3.34421	0.98075	0.326716		Gm11408
ENSMUSG00000114382	1.62331	3.27829	2.44088	1.34308	0.179247		AC130217.1
ENSMUSG00000085242	2.10977	3.27767	3.22329	1.01687	0.309214		Gm11537
ENSMUSG00000114739	5.0843	3.27691	1.37329	2.38617	0.0170248	0.0993826	AC158525.1
ENSMUSG00000109104	1.81734	3.27488	2.03293	1.61092	0.107198		Gm6108
ENSMUSG00000046834	2.92951	3.27073	1.95795	1.67049	0.0948226		Krt1
ENSMUSG00000083482	6.10723	3.27012	1.30865	2.49885	0.0124596	0.0807633	Gm14706
ENSMUSG00000110060	6.5394	3.26993	1.34756	2.42655	0.0152432	0.0919222	Gm9860
ENSMUSG00000114830	1.42889	3.26939	2.26654	1.44246	0.149174		AC069562.2
ENSMUSG00000102705	4.4419	3.26898	1.4498	2.25478	0.0241469	0.124397	4632432E15Rik
ENSMUSG00000061272	19.7797	3.26873	0.804854	4.06127	4.88067e-05	0.0017689	Gm14173
ENSMUSG00000089961	3.13263	3.26817	6.42332	0.508797	0.610894		Gm16567
ENSMUSG00000068231	8.00713	3.26787	1.17898	2.77177	0.00557523	0.0476427	Vmn1r43
ENSMUSG00000027460	5.99381	3.26344	4.69048	0.695757	0.486581	0.713869	Angpt4
ENSMUSG00000082735	1.26552	3.26282	3.00001	1.0876	0.276771		Gm16394
ENSMUSG00000082779	0.595167	3.26254	6.4309	0.507322	0.611929		Gm13162
ENSMUSG00000112553	1.30254	3.26057	3.16865	1.02901	0.303476		Gm4556
ENSMUSG00000094733	5.58147	3.2599	2.68343	1.21483	0.224433	0.468763	Gm5416
ENSMUSG00000086699	1.67906	3.25777	2.55321	1.27595	0.201974		Gm16510
ENSMUSG00000028174	20.1489	3.25743	1.07156	3.03989	0.00236664	0.0270079	Rpe65
ENSMUSG00000089673	0.878496	3.25624	2.9067	1.12025	0.262605		Gm16546
ENSMUSG00000049246	3.61254	3.25621	1.47577	2.20645	0.0273526		Hspe1-ps2
ENSMUSG00000099394	1.11971	3.25515	3.23372	1.00663	0.314113		Gm9142
ENSMUSG00000112033	4.83172	3.25506	1.88082	1.73066	0.0835133	0.264923	AC125020.2
ENSMUSG00000092283	40.5528	3.2547	1.11983	2.90643	0.00365581	0.0363181	Gm20412
ENSMUSG00000035373	332.031	3.25067	1.10901	2.93114	0.00337721	0.0344358	Ccl7
ENSMUSG00000102184	2.44595	3.24716	1.97112	1.64737	0.0994823		Gm37192
ENSMUSG00000047104	15.1413	3.24485	2.03187	1.59698	0.11027	0.311153	Pbp2
ENSMUSG00000085114	0.50861	3.24414	6.41989	0.505326	0.61333		1600025M17Rik
ENSMUSG00000108265	0.691963	3.2435	6.42337	0.504953	0.613592		Olfr318
ENSMUSG00000033255	2.63363	3.24301	2.3476	1.38141	0.167152		Gm5134
ENSMUSG00000088148	0.60105	3.24278	6.42769	0.504503	0.613908		Mir1983
ENSMUSG00000112411	2.47501	3.24225	2.66334	1.21736	0.223466		Gm19337
ENSMUSG00000065905	0.643874	3.24101	6.42556	0.504394	0.613984		Gm26110
ENSMUSG00000095249	5.72938	3.23858	1.94817	1.66237	0.0964377	0.288247	n-R5s103
ENSMUSG00000112843	5.6935	3.23857	1.87913	1.72345	0.0848079	0.267257	Gm46224
ENSMUSG00000094452	0.898421	3.23728	3.52873	0.917406	0.35893		Gm22623
ENSMUSG00000096141	9.27085	3.23549	1.18629	2.7274	0.00638349	0.0522389	Dnah7a
ENSMUSG00000074677	278.593	3.23498	0.586143	5.51909	3.40755e-08	9.10237e-06	Sirpb1c
ENSMUSG00000054006	1.04218	3.23288	4.18069	0.77329	0.439351		D630008O14Rik
ENSMUSG00000061992	1.15089	3.22989	3.80944	0.847865	0.396513		Gm4953
ENSMUSG00000039419	4.35367	3.22984	2.13342	1.51393	0.130044		Cntnap2
ENSMUSG00000083580	8.60224	3.22921	1.11524	2.89552	0.00378534	0.0369934	Rpsa-ps3
ENSMUSG00000074595	2.23633	3.22827	2.04296	1.58019	0.114062		Wfdc6a
ENSMUSG00000029371	1807.79	3.22693	1.11121	2.90397	0.0036846	0.0364964	Cxcl5
ENSMUSG00000110172	8.86961	3.22544	1.25733	2.56531	0.0103084	0.0711235	Gm39147
ENSMUSG00000098105	4.64077	3.22465	1.30155	2.47754	0.013229	0.0840633	Gm8825
ENSMUSG00000091825	1.83518	3.22397	2.19378	1.4696	0.141671		Gm5778
ENSMUSG00000084216	0.637032	3.22384	3.79591	0.849295	0.395717		Gm7973
ENSMUSG00000096887	1.56874	3.21823	2.23574	1.43944	0.150025		Gm20594
ENSMUSG00000103257	5.71444	3.2175	1.28465	2.50458	0.0122598	0.0798752	Gm7977
ENSMUSG00000080709	0.514468	3.21525	6.46182	0.497576	0.618783		Gm14324
ENSMUSG00000103053	1.48493	3.21289	5.90527	0.544071	0.586393		Gm38271
ENSMUSG00000053545	0.805862	3.21263	5.77531	0.55627	0.578026		6430503K07Rik
ENSMUSG00000102051	148.755	3.21258	0.915178	3.51033	0.000447546	0.00849434	I830127L07Rik
ENSMUSG00000031450	0.666721	3.21053	6.43169	0.499173	0.617657		Grk1
ENSMUSG00000090067	0.846589	3.20902	4.14835	0.773567	0.439187		Gm2976
ENSMUSG00000036964	3.21064	3.20819	1.73247	1.8518	0.064055		Trim17
ENSMUSG00000097423	0.475593	3.20796	6.42114	0.499593	0.617361		Gm26522
ENSMUSG00000102494	0.912235	3.20748	4.05741	0.790524	0.429222		Gm36988
ENSMUSG00000113705	2.93347	3.20592	2.61174	1.2275	0.219633		AC238676.3
ENSMUSG00000029379	349.384	3.20356	1.22775	2.60929	0.00907316	0.065404	Cxcl3
ENSMUSG00000024365	4.49063	3.20274	1.45625	2.1993	0.0278566	0.135895	Cyp21a1
ENSMUSG00000033595	2.06146	3.20141	4.03132	0.794134	0.427117		Lgi3
ENSMUSG00000094607	1.15683	3.19974	6.4463	0.496369	0.619634		Trav12d-3
ENSMUSG00000098157	0.727985	3.19882	4.99209	0.640777	0.521668		Gm9022
ENSMUSG00000096367	5.07704	3.19265	1.93382	1.65095	0.0987479	0.292406	n-R5s107
ENSMUSG00000095028	212.283	3.19116	0.66054	4.83114	1.35752e-06	0.000140539	Sirpb1b
ENSMUSG00000062329	14.8715	3.18519	2.11885	1.50326	0.132772	0.34687	Cytl1
ENSMUSG00000095054	1.042	3.18321	4.02883	0.790108	0.429465		Gm13146
ENSMUSG00000114555	0.738766	3.1814	6.0791	0.523334	0.600742		AC141476.1
ENSMUSG00000114877	0.575914	3.18019	6.42254	0.495161	0.620487		AC165092.2
ENSMUSG00000084041	2.0516	3.17761	2.08804	1.52182	0.128055		Gm15312
ENSMUSG00000102972	28.9638	3.17656	0.851935	3.72863	0.00019252	0.00467515	Gm37348
ENSMUSG00000031610	8.63659	3.17537	2.41807	1.31318	0.189122	0.425101	Scrg1
ENSMUSG00000046846	8.10522	3.17179	1.26163	2.51405	0.0119353	0.0785415	Spesp1
ENSMUSG00000108681	1.55838	3.17021	2.2549	1.40592	0.159748		Gm17825
ENSMUSG00000082730	1.67719	3.16959	2.43231	1.30312	0.192534		Gm11363
ENSMUSG00000109947	1.51461	3.1661	6.43063	0.492348	0.622474		Gm45669
ENSMUSG00000112597	2.52476	3.16571	1.86842	1.69432	0.0902039		AC153974.2
ENSMUSG00000106995	1.03662	3.1621	3.83476	0.824589	0.409605		Gm33167
ENSMUSG00000082076	0.997791	3.15994	2.88946	1.09361	0.274127		Gm8659
ENSMUSG00000111886	3.14309	3.15935	1.52625	2.07001	0.038451		AC123067.1
ENSMUSG00000108858	7.41528	3.15865	0.978264	3.22883	0.00124297	0.0173839	Gm4587
ENSMUSG00000051198	0.942706	3.15567	3.82331	0.825377	0.409158		4930548G14Rik
ENSMUSG00000048455	1.50119	3.15566	3.964	0.796079	0.425986		Sprr1b
ENSMUSG00000110311	2.25858	3.15514	1.6352	1.92952	0.0536667		Gm45410
ENSMUSG00000043295	0.911868	3.15341	3.02921	1.041	0.297875		Gm16373
ENSMUSG00000021765	87.6539	3.15081	0.719326	4.38023	1.18555e-05	0.000656056	Fst
ENSMUSG00000060161	0.814998	3.15027	4.86175	0.64797	0.517004		Klk1b7-ps
ENSMUSG00000109580	2.51742	3.14876	1.89469	1.66189	0.0965355		Gm8268
ENSMUSG00000094509	12.2536	3.14872	1.80913	1.74045	0.0817793	0.261435	Ighv14-1
ENSMUSG00000090570	2.38209	3.14842	2.80236	1.12349	0.26123		Gm17041
ENSMUSG00000106476	2.71191	3.14776	1.97676	1.59238	0.111299		Rpl36-ps9
ENSMUSG00000080701	4.0594	3.14656	1.72775	1.82119	0.0685774		Gm12340
ENSMUSG00000090607	3.12042	3.14522	2.13678	1.47194	0.141037		Gm17052
ENSMUSG00000053338	253.113	3.14331	0.817688	3.84415	0.000120973	0.00335844	Tarm1
ENSMUSG00000020383	1.45856	3.14328	2.95544	1.06356	0.287529		Il13
ENSMUSG00000013974	583.693	3.14301	0.601448	5.22573	1.73467e-07	3.13692e-05	Mcemp1
ENSMUSG00000108786	0.704729	3.14287	3.64866	0.861378	0.38903		Gm8309
ENSMUSG00000064663	1.45821	3.14088	2.47821	1.2674	0.205012		Gm24859
ENSMUSG00000104712	0.638483	3.14016	6.42503	0.488739	0.625026		Igkv4-75
ENSMUSG00000051397	45.7437	3.13973	0.873619	3.59393	0.000325724	0.0068624	Tacstd2
ENSMUSG00000027861	1.01507	3.13326	5.34517	0.586186	0.55775		Casq2
ENSMUSG00000064495	2.33331	3.13326	1.97372	1.58749	0.112401		Gm24313
ENSMUSG00000109331	1.79038	3.13189	1.91543	1.63508	0.102031		Gm42402
ENSMUSG00000093834	2.22561	3.13057	2.12462	1.47347	0.140624		Rnu1b2
ENSMUSG00000090223	2.73315	3.12794	2.04498	1.52957	0.126124		Pcp4
ENSMUSG00000091786	19.5573	3.12765	0.654645	4.77763	1.77373e-06	0.000169984	Gm8425
ENSMUSG00000076576	172.297	3.12364	1.48849	2.09853	0.0358585	0.159841	Igkv6-32
ENSMUSG00000108607	1.06227	3.12113	3.04818	1.02393	0.305867		Gm44646
ENSMUSG00000076760	1.70128	3.11613	3.38365	0.920937	0.357083		Trav3-1
ENSMUSG00000093858	0.99018	3.11499	3.18279	0.978696	0.32773		Gm19967
ENSMUSG00000113762	4.04032	3.11486	1.74438	1.78566	0.0741548		AC122327.3
ENSMUSG00000100561	2.23772	3.11349	1.96336	1.5858	0.112786		Gm7516
ENSMUSG00000032268	4.58189	3.11154	1.73538	1.793	0.0729728	0.243984	Tmprss5
ENSMUSG00000076581	1.05618	3.10736	4.05886	0.765575	0.443929		Igkv8-26
ENSMUSG00000115090	3.35445	3.10365	1.82857	1.6973	0.0896391		AC155167.1
ENSMUSG00000107836	0.907108	3.10346	2.62551	1.18204	0.237189		Gm5315
ENSMUSG00000025355	460.348	3.10279	0.881413	3.52025	0.000431146	0.00830047	Mmp19
ENSMUSG00000113600	24.3124	3.10006	0.673843	4.60057	4.21346e-06	0.000303027	Gm7868
ENSMUSG00000027716	2.45602	3.09952	2.22691	1.39185	0.163968		Trpc3
ENSMUSG00000090024	1.1219	3.09851	4.71847	0.656678	0.511388		Gm16350
ENSMUSG00000109267	0.613236	3.0967	6.43092	0.481534	0.630137		Gm45048
ENSMUSG00000029679	0.618998	3.09626	6.4259	0.481841	0.629919		Hyal6
ENSMUSG00000096336	201.072	3.0953	1.01871	3.03846	0.00237794	0.0270744	Igkv1-135
ENSMUSG00000076533	25.7559	3.09504	1.69416	1.82689	0.0677165	0.233954	Igkv4-90
ENSMUSG00000027656	24.6648	3.09206	1.73305	1.78417	0.0743957	0.247152	Wisp2
ENSMUSG00000030858	0.868756	3.08788	3.33824	0.925003	0.354965		1700007K09Rik
ENSMUSG00000105395	2.33601	3.08757	2.32221	1.32958	0.183656		Gm42672
ENSMUSG00000095170	21.0872	3.08673	1.55026	1.9911	0.0464698	0.186647	Ighv8-11
ENSMUSG00000073631	8.43582	3.08576	1.14854	2.68668	0.0072166	0.056636	Gm10553
ENSMUSG00000085563	13.0022	3.08474	1.33163	2.31651	0.0205303	0.111865	2210411M09Rik
ENSMUSG00000030249	68.5412	3.08411	1.14662	2.68975	0.00715046	0.0563213	Abcc9
ENSMUSG00000107465	2.65453	3.084	1.939	1.59051	0.11172		Gm5990
ENSMUSG00000085327	4.14772	3.08362	1.65021	1.86862	0.0616753		Gm16104
ENSMUSG00000094097	4.51285	3.08281	2.02321	1.52373	0.127577	0.339233	n-R5s111
ENSMUSG00000085508	0.719351	3.07846	2.85342	1.07887	0.280647		Gm13965
ENSMUSG00000115100	0.996883	3.0771	3.4746	0.885599	0.375834		AC131586.2
ENSMUSG00000056054	16371.8	3.07481	1.15465	2.66299	0.00774491	0.0592614	S100a8
ENSMUSG00000086272	2.01135	3.07363	2.41006	1.27533	0.202191		BC039966
ENSMUSG00000107962	1.06831	3.06777	3.46604	0.885093	0.376106		Gm43980
ENSMUSG00000108370	1.57519	3.06671	1.9682	1.55813	0.119203		Gm8209
ENSMUSG00000053441	3.68629	3.06582	1.56033	1.96486	0.0494309		Adamts19
ENSMUSG00000087293	1.54199	3.06569	2.50782	1.22246	0.221536		Gm14341
ENSMUSG00000092577	1.70351	3.06474	1.8197	1.6842	0.0921429		Gm7393
ENSMUSG00000058755	762.265	3.06421	0.656772	4.66556	3.07778e-06	0.000245734	Osm
ENSMUSG00000089048	1.80977	3.06411	1.76871	1.7324	0.0832019		Gm26167
ENSMUSG00000096461	17.3186	3.06353	1.8835	1.62651	0.103841	0.301342	Igkv14-130
ENSMUSG00000074111	1.26325	3.05935	3.60525	0.848581	0.396114		Mrgpra9
ENSMUSG00000072423	0.536078	3.05849	6.4607	0.473399	0.635929		Psmb11
ENSMUSG00000113559	0.753741	3.05706	4.22822	0.723013	0.469672		Gm40987
ENSMUSG00000090257	2.95691	3.05284	2.15018	1.41981	0.155664		Gm4524
ENSMUSG00000065878	6.21938	3.05113	1.27898	2.38559	0.0170516	0.0994728	Snord34
ENSMUSG00000108177	0.91215	3.0505	3.36408	0.906788	0.364519		Gm7924
ENSMUSG00000107512	0.660121	3.04528	6.41198	0.474937	0.634832		Gm44433
ENSMUSG00000062257	2.95481	3.04461	2.275	1.33829	0.180803		Opcml
ENSMUSG00000094938	5.53586	3.04416	1.30165	2.33869	0.0193516	0.107821	Gm23092
ENSMUSG00000026678	198.609	3.04407	1.62291	1.87569	0.0606982	0.218378	Rgs5
ENSMUSG00000109168	17.6647	3.04351	1.44316	2.10892	0.0349512	0.157714	Gm44709
ENSMUSG00000029819	4.44344	3.04281	3.17082	0.959628	0.337243	0.588509	Npy
ENSMUSG00000110599	0.792312	3.04241	3.55607	0.855555	0.392244		6030466F02Rik
ENSMUSG00000023192	3.09344	3.04213	1.96062	1.55162	0.120753		Grm2
ENSMUSG00000065685	0.552896	3.04191	6.43615	0.472628	0.636479		Gm23732
ENSMUSG00000064646	0.553592	3.03966	5.26828	0.576974	0.563957		Gm23300
ENSMUSG00000093807	1.23344	3.03966	3.38147	0.898917	0.368697		Gm23620
ENSMUSG00000093390	2.4653	3.03924	2.63346	1.15408	0.248466		Gm20652
ENSMUSG00000101556	3.76816	3.03841	1.51308	2.0081	0.0446332		Gm28869
ENSMUSG00000104555	4.06594	3.03839	1.69167	1.79609	0.0724801		Gm5983
ENSMUSG00000095805	3.66302	3.03726	1.68242	1.80528	0.0710301		Gm22092
ENSMUSG00000097379	3.8551	3.03638	1.88742	1.60875	0.107672		Gm26873
ENSMUSG00000090008	0.844524	3.03508	2.99551	1.01321	0.31096		Gm16111
ENSMUSG00000096015	6.65361	3.03429	1.82024	1.66697	0.0955198	0.286824	n-R5s134
ENSMUSG00000029019	4.12509	3.03361	1.6192	1.87352	0.0609963		Nppb
ENSMUSG00000027360	1595.71	3.03308	0.728181	4.16529	3.1096e-05	0.0013014	Hdc
ENSMUSG00000087233	0.651591	3.03213	6.10687	0.496511	0.619534		Gm43213
ENSMUSG00000094873	1.70932	3.03035	2.51231	1.2062	0.227739		Gm13812
ENSMUSG00000115618	1.33469	3.02828	2.36552	1.28018	0.200483		CT009550.3
ENSMUSG00000049130	453.551	3.02669	0.604103	5.01023	5.43644e-07	7.20711e-05	C5ar1
ENSMUSG00000110188	1.03287	3.02483	4.43183	0.682524	0.494908		Gm45432
ENSMUSG00000097903	4.20226	3.02241	1.73493	1.74209	0.0814923		Gm26679
ENSMUSG00000031444	574.685	3.02108	1.10187	2.74178	0.00611073	0.0508334	F10
ENSMUSG00000114711	0.476987	3.01969	6.40679	0.471327	0.637407		AC117656.2
ENSMUSG00000107991	0.680513	3.01905	3.27793	0.921022	0.357039		Gm43919
ENSMUSG00000114413	0.63642	3.01556	3.724	0.809765	0.418076		AC132881.1
ENSMUSG00000023987	1.6563	3.01422	2.90173	1.03876	0.298914		Pgc
ENSMUSG00000092550	23.5299	3.0118	1.2323	2.44405	0.0145234	0.0891722	Gm20496
ENSMUSG00000091185	0.81351	3.01077	3.61103	0.83377	0.404411		Gm3278
ENSMUSG00000030068	2.32463	3.0105	2.57842	1.16758	0.242977		Gm20696
ENSMUSG00000008482	2.39466	3.01025	1.98498	1.51651	0.12939		Rnf151
ENSMUSG00000107568	4.12792	3.00672	1.68219	1.78739	0.073875		Gm18840
ENSMUSG00000092056	8.29777	3.00644	0.968517	3.10417	0.00190816	0.0232733	Gm7289
ENSMUSG00000090119	1.29113	3.00286	2.61849	1.14679	0.251469		Gm8185
ENSMUSG00000095426	1.01263	3.00152	6.40895	0.468333	0.639547		Trav6d-5
ENSMUSG00000109036	18.0479	3.00072	1.33244	2.25205	0.024319	0.124907	2210406H18Rik
ENSMUSG00000081086	1.203	2.99981	3.13941	0.955533	0.339308		Gm9506
ENSMUSG00000104679	3.92578	2.99467	2.78214	1.07639	0.281752		Igkv4-60
ENSMUSG00000102158	0.563504	2.99379	6.43578	0.465179	0.641803		Gm34342
ENSMUSG00000065347	1.15146	2.99331	2.43708	1.22824	0.219358		Gm25583
ENSMUSG00000098201	7.56155	2.99326	1.59333	1.87862	0.0602957	0.217513	Gm26983
ENSMUSG00000023439	1.12485	2.9926	4.01965	0.744493	0.456578		Gnb3
ENSMUSG00000012520	2.64266	2.99123	2.61694	1.14303	0.253027		Phox2b
ENSMUSG00000058463	15.5256	2.98896	0.726077	4.11659	3.84524e-05	0.00152102	Gm5471
ENSMUSG00000101308	1.41087	2.985	4.08983	0.729859	0.465476		Gm28989
ENSMUSG00000113125	0.718713	2.98356	6.44777	0.462727	0.64356		AC140477.2
ENSMUSG00000084328	14.1241	2.98145	0.757905	3.9338	8.36119e-05	0.00256976	Gm14046
ENSMUSG00000079293	383.991	2.98138	0.8851	3.36841	0.000756031	0.0123739	Clec7a
ENSMUSG00000064945	6.80046	2.98111	1.59641	1.86738	0.0618484	0.221226	Rny3
ENSMUSG00000062342	3.75255	2.9809	2.83117	1.05288	0.292394		Serpinb9e
ENSMUSG00000091735	2.95218	2.9808	2.12624	1.40191	0.160942		Gpr62
ENSMUSG00000100025	12.3307	2.97922	0.794705	3.74884	0.000177652	0.00443351	Gm8141
ENSMUSG00000096074	4.08863	2.97528	2.04842	1.45248	0.146369		Ighv1-72
ENSMUSG00000108441	0.889199	2.97427	6.4049	0.464375	0.642379		Gm32846
ENSMUSG00000025877	386.504	2.97381	0.629415	4.72473	2.30427e-06	0.000204812	Hk3
ENSMUSG00000027827	10.7613	2.97149	1.3842	2.14672	0.0318158	0.148426	Kcnab1
ENSMUSG00000069962	16.8292	2.96672	0.760998	3.89847	9.68035e-05	0.00287711	Gm5356
ENSMUSG00000038077	3.77549	2.96567	1.6294	1.8201	0.0687442		Kcna6
ENSMUSG00000070868	2.7909	2.96557	3.2852	0.902705	0.366682		Skint3
ENSMUSG00000092540	26.2821	2.96541	0.655028	4.52714	5.97864e-06	0.000390815	Gm8738
ENSMUSG00000108266	2.20976	2.96518	1.76601	1.67902	0.0931476		Gm5305
ENSMUSG00000089727	1.60229	2.96345	3.07014	0.96525	0.334419		Klra8
ENSMUSG00000096715	110.457	2.95978	1.37727	2.14902	0.0316331	0.14786	Igkv3-4
ENSMUSG00000103380	4.0963	2.95647	2.28541	1.29363	0.195793		Gm37756
ENSMUSG00000054641	82.4264	2.95637	0.891505	3.31616	0.000912634	0.0140147	Mmrn1
ENSMUSG00000030638	11.3182	2.952	1.61921	1.82311	0.068287	0.234901	Sh3gl3
ENSMUSG00000109002	1.50272	2.95079	2.75379	1.07154	0.283928		Gm38405
ENSMUSG00000099337	1.5649	2.94845	2.72768	1.08094	0.279726		Gm29486
ENSMUSG00000026344	16.7559	2.94843	0.856604	3.44199	0.000577444	0.0102076	Lypd1
ENSMUSG00000110698	14.9211	2.94697	1.33685	2.20442	0.0274947	0.134654	Gm45875
ENSMUSG00000076433	1.47706	2.94491	3.14767	0.935584	0.349488		Cep295nl
ENSMUSG00000029915	187.832	2.94037	0.721993	4.07258	4.64958e-05	0.00171677	Clec5a
ENSMUSG00000107658	0.762604	2.9399	4.87335	0.603261	0.546335		Gm44958
ENSMUSG00000029082	478.192	2.93832	0.913939	3.215	0.00130444	0.0178973	Bst1
ENSMUSG00000026051	1.28201	2.93774	4.42705	0.663587	0.506955		1500015O10Rik
ENSMUSG00000085295	12.6701	2.93742	1.67577	1.75288	0.0796228	0.258058	4930430E12Rik
ENSMUSG00000089599	0.630048	2.93734	6.43206	0.456673	0.647906		Gm26157
ENSMUSG00000097861	2.42085	2.93303	1.88045	1.55975	0.118819		Gm26858
ENSMUSG00000102960	2.08933	2.93112	2.37462	1.23435	0.217072		Gm37943
ENSMUSG00000087206	1.48804	2.93026	5.22992	0.560289	0.575282		Gm16175
ENSMUSG00000047562	1041.01	2.93	1.04828	2.79506	0.00518896	0.0454365	Mmp10
ENSMUSG00000042002	1.67929	2.92824	2.24598	1.30377	0.192312		Foxn4
ENSMUSG00000106478	10.4877	2.92785	1.31449	2.22737	0.0259226	0.129955	Gm36551
ENSMUSG00000076677	75.4773	2.92759	1.09428	2.67535	0.00746509	0.0577277	Ighv6-3
ENSMUSG00000111336	1.14901	2.92578	2.93113	0.998174	0.318195		Aldoa-ps4
ENSMUSG00000110316	2.80845	2.92513	1.66165	1.76037	0.0783448		Gm45311
ENSMUSG00000043740	115.565	2.92465	0.630635	4.63763	3.52422e-06	0.000266125	B430306N03Rik
ENSMUSG00000054162	3.17739	2.92416	6.47227	0.451798	0.651415		Spock3
ENSMUSG00000105501	2.4747	2.92284	1.66593	1.75448	0.0793488		5330426L24Rik
ENSMUSG00000035189	3.84434	2.92279	2.09907	1.39242	0.163795		Ano4
ENSMUSG00000058354	185.411	2.92144	1.35022	2.16368	0.030489	0.144258	Krt6a
ENSMUSG00000095799	0.766835	2.91899	5.95357	0.490292	0.623927		Gm8332
ENSMUSG00000082023	4.20661	2.91625	1.20603	2.41807	0.0156033		Gm14407
ENSMUSG00000097424	0.897873	2.91438	5.54782	0.525321	0.59936		1700030M09Rik
ENSMUSG00000076470	28.6399	2.91437	1.00964	2.88655	0.00389494	0.0375733	Trbv13-3
ENSMUSG00000024059	12.4293	2.91389	1.26735	2.2992	0.0214935	0.114999	Clip4
ENSMUSG00000115779	2.23134	2.91343	2.59062	1.12461	0.260755		AC158954.1
ENSMUSG00000110240	3.75137	2.91192	2.41114	1.20769	0.227166		Gm45486
ENSMUSG00000051251	1.62353	2.91028	3.12213	0.932143	0.351263		Nhlh1
ENSMUSG00000082350	2.11578	2.90973	2.01975	1.44064	0.149687		Gm14008
ENSMUSG00000081607	11.5663	2.90961	0.861447	3.37758	0.000731264	0.0120689	Gm15294
ENSMUSG00000080817	0.641444	2.90635	6.39324	0.454597	0.649399		Gm13751
ENSMUSG00000102330	1.24633	2.90581	2.33296	1.24555	0.21293		Gm37234
ENSMUSG00000096976	15.3052	2.90456	1.50641	1.92813	0.0538387	0.203691	Gm26882
ENSMUSG00000093919	1.45332	2.90424	2.38732	1.21652	0.223785		Gm20760
ENSMUSG00000089664	2.77957	2.90402	1.86101	1.56045	0.118653		Gm12494
ENSMUSG00000096037	0.54796	2.90363	6.42267	0.452091	0.651203		n-R5s136
ENSMUSG00000094185	29.0874	2.90312	0.545944	5.31761	1.05138e-07	2.10636e-05	Gm5445
ENSMUSG00000041309	3.16198	2.90234	2.08479	1.39215	0.163878		Nkx6-2
ENSMUSG00000103822	2.60382	2.9018	2.00462	1.44756	0.14774		6030460B20Rik
ENSMUSG00000106281	2.27079	2.90065	1.90326	1.52405	0.127497		Gm44346
ENSMUSG00000105109	1.86688	2.89855	2.27066	1.27653	0.20177		Gm44297
ENSMUSG00000030125	1.47392	2.89731	2.71219	1.06826	0.285405		Lrrc23
ENSMUSG00000030703	2105.2	2.89467	1.46733	1.97275	0.0485245	0.191872	Gdpd3
ENSMUSG00000109861	2.05429	2.89465	2.35477	1.22927	0.218969		4930458B22Rik
ENSMUSG00000085465	0.834286	2.89442	6.43411	0.449857	0.652814		Gm15347
ENSMUSG00000081002	0.905425	2.89193	5.26269	0.549517	0.582651		Gm14240
ENSMUSG00000102211	6.54	2.89101	1.1169	2.58843	0.00964153	0.0679284	Gm37490
ENSMUSG00000092695	2.69226	2.88811	2.14638	1.34557	0.178441		Mir3092
ENSMUSG00000111681	0.425759	2.88785	6.44921	0.447784	0.654309		AC138284.4
ENSMUSG00000035694	3.01355	2.88721	1.75147	1.64845	0.0992605		Caps2
ENSMUSG00000113183	1.04966	2.88628	2.95455	0.976893	0.328622		AC153143.1
ENSMUSG00000115199	0.465197	2.88367	6.44002	0.447773	0.654317		Vmn1r15
ENSMUSG00000099104	4.55174	2.88354	1.32492	2.17639	0.0295263	0.14131	Gm17087
ENSMUSG00000078817	95.7051	2.88063	0.847716	3.3981	0.000678549	0.0114626	Nlrp12
ENSMUSG00000092409	1.02907	2.87747	2.81867	1.02086	0.30732		Gm9613
ENSMUSG00000114345	19.2098	2.87747	1.44402	1.99267	0.0462973	0.186315	CT009601.1
ENSMUSG00000107933	1.31605	2.87713	2.65632	1.08312	0.278753		Gm30498
ENSMUSG00000104350	2.41468	2.87618	2.06452	1.39315	0.163576		Gm38244
ENSMUSG00000064325	3.48099	2.87381	2.76297	1.04011	0.298287		Hhip
ENSMUSG00000065084	4.40479	2.87239	1.36835	2.09916	0.0358028	0.159692	Gm26496
ENSMUSG00000104780	7.18609	2.8723	1.00133	2.86849	0.00412438	0.0389478	Gm19843
ENSMUSG00000078926	3.21162	2.87114	1.73636	1.65354	0.0982218		Cdc20b
ENSMUSG00000095829	1.89248	2.87084	3.4368	0.835323	0.403536		Speer1
ENSMUSG00000095180	7.55903	2.86761	2.05664	1.39432	0.163222	0.390366	Rhox5
ENSMUSG00000106106	337.883	2.8656	0.881037	3.25253	0.00114383	0.016397	CT010467.1
ENSMUSG00000105644	4.19376	2.86521	1.44695	1.98018	0.0476832		Gm19739
ENSMUSG00000076480	20.4367	2.8639	1.09617	2.61264	0.0089846	0.0651474	Trbv29
ENSMUSG00000096710	3.40145	2.86337	2.27651	1.25779	0.208468		n-R5s117
ENSMUSG00000097628	20.8324	2.86292	0.794835	3.6019	0.0003159	0.00672086	Gm2383
ENSMUSG00000111052	6.87164	2.86189	1.39307	2.05438	0.0399388	0.170647	Gm20139
ENSMUSG00000097443	2.17383	2.86161	4.30501	0.664716	0.506232		Gm17529
ENSMUSG00000112793	1.13522	2.86126	4.02338	0.711157	0.476987		Gm32872
ENSMUSG00000114888	3.07792	2.86045	1.5745	1.81674	0.0692568		AC140462.2
ENSMUSG00000108095	8.28914	2.85824	2.03977	1.40126	0.161138	0.388082	Gm44067
ENSMUSG00000102830	0.772101	2.8555	6.42095	0.444716	0.656525		Gm37012
ENSMUSG00000103693	26.0691	2.85515	0.9435	3.02613	0.00247708	0.0278163	Gm37529
ENSMUSG00000094977	1.61388	2.85361	3.00417	0.949883	0.342172		Gm25256
ENSMUSG00000087554	1.41219	2.85323	5.12035	0.557234	0.577368		Gm15646
ENSMUSG00000107389	0.883012	2.85309	2.64465	1.07882	0.28067		Gm43124
ENSMUSG00000076535	48.072	2.85	1.92133	1.48335	0.137981	0.354689	Igkv1-88
ENSMUSG00000076531	4.01465	2.84861	2.7021	1.05422	0.291782		Igkv4-92
ENSMUSG00000035296	0.752648	2.84726	6.45894	0.440825	0.65934		Sgcg
ENSMUSG00000083156	0.904053	2.84675	4.3609	0.652791	0.513891		Gm12201
ENSMUSG00000110790	3.16644	2.8465	1.74284	1.63326	0.102415		AC159314.1
ENSMUSG00000045763	421.554	2.84497	0.738101	3.85444	0.000115994	0.00326792	Basp1
ENSMUSG00000081665	451.553	2.84433	0.901078	3.15658	0.00159629	0.0205834	Gm15922
ENSMUSG00000023349	445.069	2.84392	0.452139	6.28993	3.17607e-10	2.36968e-07	Clec4n
ENSMUSG00000085397	2.30154	2.84305	1.89315	1.50176	0.133159		Gm13524
ENSMUSG00000094502	21.0319	2.84218	1.46916	1.93456	0.0530448	0.202101	Ighv1-69
ENSMUSG00000064637	2.55988	2.84189	1.82335	1.55861	0.119089		Snora20
ENSMUSG00000085973	0.634785	2.84057	6.4259	0.44205	0.658453		Gm14742
ENSMUSG00000036169	5.13034	2.84051	1.82084	1.56	0.118759	0.32543	Sostdc1
ENSMUSG00000104893	1.2151	2.84036	2.08447	1.36263	0.173		Gm2404
ENSMUSG00000076655	37.4381	2.83614	1.06745	2.65694	0.00788544	0.0599078	Ighv4-1
ENSMUSG00000090027	0.784427	2.8354	4.96084	0.571555	0.567623		Gm15740
ENSMUSG00000101262	136.22	2.83076	0.41947	6.74842	1.49466e-11	2.19198e-08	Gm8326
ENSMUSG00000044377	7.27026	2.83073	1.08418	2.61094	0.0090294	0.0653408	Gm13080
ENSMUSG00000081034	38.1103	2.82985	0.521167	5.42984	5.64046e-08	1.36371e-05	Gm5944
ENSMUSG00000073973	0.629638	2.82962	5.10183	0.554629	0.579149		Olfr552
ENSMUSG00000070570	1.97915	2.82918	2.3059	1.22693	0.219848		Slc17a7
ENSMUSG00000025330	229.59	2.82781	0.736251	3.84082	0.000122625	0.00339289	Padi4
ENSMUSG00000079357	11.013	2.82717	1.37564	2.05517	0.0398628	0.170452	Gm11100
ENSMUSG00000080703	1.00405	2.82615	4.25191	0.664677	0.506257		Gm13183
ENSMUSG00000104927	4.72711	2.82517	2.17693	1.29778	0.194364	0.431992	Gm43388
ENSMUSG00000101389	282.796	2.82459	0.985892	2.86501	0.00416998	0.0392798	Ms4a4a
ENSMUSG00000026736	1.89494	2.82298	2.76553	1.02077	0.307362		4930426L09Rik
ENSMUSG00000055095	25.8709	2.82072	1.10805	2.54565	0.0109075	0.0738672	Spink6
ENSMUSG00000097681	3.30419	2.82006	2.00449	1.40688	0.159464		Gm26643
ENSMUSG00000112196	1.95052	2.82002	1.91914	1.46942	0.14172		Gm8274
ENSMUSG00000050069	22.5698	2.81943	1.19899	2.3515	0.0186979	0.105824	Grem2
ENSMUSG00000109482	1.26401	2.81898	3.37132	0.836163	0.403063		Gm4756
ENSMUSG00000022432	1.58869	2.81615	5.89957	0.477348	0.633114		Smc1b
ENSMUSG00000096672	15.6736	2.81522	1.74608	1.61231	0.106895	0.305615	Ighv1-63
ENSMUSG00000003420	2390.86	2.81438	0.43103	6.52945	6.60126e-11	7.14158e-08	Fcgrt
ENSMUSG00000076526	89.2765	2.81351	1.42706	1.97154	0.0486618	0.192123	Igkv12-98
ENSMUSG00000082740	6.28883	2.81213	1.2569	2.23735	0.0252631	0.128104	Gm14127
ENSMUSG00000081924	3.04761	2.8115	1.67402	1.67949	0.093056		Gm11191
ENSMUSG00000054013	1.25213	2.8107	6.45204	0.43563	0.663105		Tmem179
ENSMUSG00000066684	84.1997	2.81011	0.540925	5.19502	2.04703e-07	3.54333e-05	Pilrb1
ENSMUSG00000063011	558.525	2.80944	0.546068	5.14485	2.67731e-07	4.19775e-05	Msln
ENSMUSG00000086596	1.2254	2.8076	6.41956	0.437352	0.661856		Susd5
ENSMUSG00000112424	1.685	2.80652	2.28147	1.23014	0.218646		Gm6494
ENSMUSG00000084257	7.61066	2.80477	1.70731	1.64281	0.100423	0.295707	Gm11597
ENSMUSG00000094720	7.32113	2.80392	1.99159	1.40788	0.159166	0.385858	n-R5s100
ENSMUSG00000065551	1.93169	2.80319	1.91012	1.46754	0.142228		Mir210
ENSMUSG00000097139	0.756761	2.80305	4.87467	0.575025	0.565275		Gm26626
ENSMUSG00000081797	5.14186	2.80274	1.19428	2.3468	0.0189354	0.106522	Gm8662
ENSMUSG00000041754	110.713	2.80072	0.973535	2.87686	0.00401653	0.0382171	Trem3
ENSMUSG00000113298	0.984777	2.79928	6.44197	0.434538	0.663898		AC159632.1
ENSMUSG00000006007	4.55931	2.79915	1.89551	1.47672	0.13975	0.35725	Pdc
ENSMUSG00000115466	0.418829	2.79874	6.43792	0.434727	0.66376		Vmn1r3
ENSMUSG00000088139	6.45692	2.79863	1.063	2.63277	0.00846912	0.0626269	Gm27343
ENSMUSG00000074109	0.451841	2.79727	6.44326	0.434139	0.664187		Mrgprx2
ENSMUSG00000096999	0.912857	2.79662	4.94686	0.565331	0.571848		Gm26793
ENSMUSG00000005364	515.998	2.7966	1.01198	2.7635	0.00571844	0.0484835	Il5ra
ENSMUSG00000110516	2.08482	2.79632	2.8442	0.983164	0.325527		Gm45758
ENSMUSG00000108949	1.74023	2.79626	2.20343	1.26905	0.204424		Gm45069
ENSMUSG00000098194	4.71799	2.79624	1.34572	2.07788	0.0377204	0.164448	Gm7286
ENSMUSG00000108860	10.9494	2.79397	0.843585	3.31202	0.000926235	0.0141732	Gm6070
ENSMUSG00000062472	1.4291	2.79394	2.0524	1.36131	0.173417		Gm4945
ENSMUSG00000052951	1.51135	2.79277	3.78121	0.738593	0.460154		C130021I20Rik
ENSMUSG00000045104	4.5802	2.79258	1.40955	1.98119	0.0475703	0.189697	Gm5514
ENSMUSG00000088478	0.606309	2.79212	5.14173	0.543032	0.587108		Mir1946b
ENSMUSG00000104388	11.8365	2.79173	1.15198	2.42342	0.015375	0.0925881	Gm37033
ENSMUSG00000064115	1.96863	2.78789	2.41322	1.15526	0.247985		Cadm2
ENSMUSG00000051490	2.35865	2.78762	2.27271	1.22657	0.219986		Foxd4
ENSMUSG00000094094	78.892	2.78745	1.61607	1.72483	0.0845578	0.266702	Igkv5-45
ENSMUSG00000033910	18.383	2.78741	1.25772	2.21623	0.0266757	0.13246	Gucy1a3
ENSMUSG00000096307	6.6218	2.78692	1.89755	1.46869	0.141916	0.360077	n-R5s104
ENSMUSG00000099380	0.807249	2.78662	4.19754	0.663869	0.506774		Gm28130
ENSMUSG00000082484	23.153	2.78529	0.792145	3.51614	0.000437866	0.00836936	Gm16177
ENSMUSG00000053961	2.63137	2.78391	2.44451	1.13884	0.254769		Ang5
ENSMUSG00000000617	6.61986	2.78299	2.10292	1.32339	0.185705	0.420911	Grm6
ENSMUSG00000082917	0.580209	2.78058	6.4404	0.431741	0.66593		Gm11440
ENSMUSG00000106227	2.29958	2.77819	2.14492	1.29524	0.195237		Gm43464
ENSMUSG00000097183	7.05655	2.77669	1.33815	2.07503	0.037984	0.165032	Gm17501
ENSMUSG00000068487	12.0332	2.77647	0.863581	3.21507	0.00130414	0.0178973	Gm4943
ENSMUSG00000097854	17.046	2.77475	1.16109	2.38977	0.0168589	0.098775	Gm26602
ENSMUSG00000101171	0.682752	2.77347	6.47217	0.428523	0.668271		Gm7593
ENSMUSG00000105901	0.694333	2.77062	3.25888	0.850174	0.395228		Gm7291
ENSMUSG00000099930	5.02226	2.77034	2.64273	1.04829	0.294507	0.546411	Gm2396
ENSMUSG00000061780	50.0184	2.76851	2.07754	1.33259	0.182668	0.417094	Cfd
ENSMUSG00000082345	7.38689	2.76371	1.20463	2.29424	0.0217765	0.116111	Gm13622
ENSMUSG00000084781	0.779256	2.76369	5.85414	0.472092	0.636861		D930015M05Rik
ENSMUSG00000081429	1.03368	2.76333	2.35043	1.17567	0.239727		Rps27-ps1
ENSMUSG00000114064	1.0933	2.76321	2.16278	1.27762	0.201384		Gm9370
ENSMUSG00000059625	0.483998	2.76237	6.42276	0.430091	0.667129		Sohlh1
ENSMUSG00000083885	24.8574	2.75998	0.926049	2.98038	0.00287891	0.0306902	Gm13213
ENSMUSG00000106169	3.43818	2.75864	1.69678	1.62581	0.103991		Mir6948
ENSMUSG00000026073	1017.67	2.75849	0.802363	3.43795	0.000586127	0.0103106	Il1r2
ENSMUSG00000085844	1.10615	2.75826	6.45723	0.427158	0.669264		Gm11690
ENSMUSG00000065421	0.638589	2.75818	6.3241	0.436138	0.662736		Mirlet7a-1
ENSMUSG00000057370	1.78289	2.75738	2.01987	1.36513	0.172212		Gm8724
ENSMUSG00000082026	7.24875	2.75717	1.44344	1.91013	0.0561162	0.208838	Gm5764
ENSMUSG00000105540	0.823743	2.75696	5.66246	0.486883	0.626341		Gm7988
ENSMUSG00000100160	20.9405	2.7552	0.676422	4.0732	4.6372e-05	0.00171513	Gm28527
ENSMUSG00000094088	24.7649	2.75487	1.13257	2.43242	0.0149985	0.0910345	Ighv1-64
ENSMUSG00000094916	4.39946	2.75438	1.58086	1.74232	0.0814517	0.260937	Gm26391
ENSMUSG00000085314	1.46892	2.75224	2.63819	1.04323	0.296841		Gm14866
ENSMUSG00000105705	0.518387	2.75028	5.30609	0.518326	0.604231		AC174780.1
ENSMUSG00000087455	3.53739	2.74958	1.83276	1.50024	0.133552		5330411J11Rik
ENSMUSG00000081278	0.557568	2.74796	6.43619	0.426954	0.669413		Gm13186
ENSMUSG00000110443	5.19505	2.74384	1.18349	2.31844	0.0204254	0.111631	Gm39197
ENSMUSG00000018907	1.12295	2.74369	2.7525	0.996798	0.318862		Alox12e
ENSMUSG00000095913	3.76461	2.74315	2.47421	1.1087	0.26756		Gm21844
ENSMUSG00000082116	1.12923	2.74287	3.01635	0.909334	0.363174		Gm12188
ENSMUSG00000058567	4.70237	2.74278	1.31368	2.08786	0.0368108	0.162149	Gm2531
ENSMUSG00000100415	0.523467	2.74211	6.43204	0.42632	0.669875		Gm28089
ENSMUSG00000076543	145.26	2.73996	1.24882	2.19405	0.0282321	0.136995	Igkv4-74
ENSMUSG00000083793	18.4341	2.73774	0.836547	3.27267	0.00106536	0.015638	Gm14274
ENSMUSG00000102460	46.1581	2.73598	0.762546	3.58796	0.00033328	0.0069606	Gm38197
ENSMUSG00000082390	1.27508	2.73465	2.96941	0.92094	0.357082		Gm12136
ENSMUSG00000097725	1.29977	2.73244	4.14034	0.659956	0.509282		4930593A02Rik
ENSMUSG00000021010	1.94667	2.73023	3.60727	0.756868	0.449129		Npas3
ENSMUSG00000113018	1.8733	2.73007	1.79681	1.5194	0.128663		Gm9318
ENSMUSG00000106105	6.5511	2.72897	1.2512	2.18108	0.0291772	0.139886	Gm4525
ENSMUSG00000081238	6.50849	2.72777	1.04241	2.61679	0.00887616	0.0646427	Gm15836
ENSMUSG00000092415	6.72785	2.72751	1.35747	2.00926	0.0445092	0.182305	Gm20513
ENSMUSG00000098065	2.50578	2.72553	1.85405	1.47004	0.14155		Gm5177
ENSMUSG00000031517	48.9251	2.72502	0.860172	3.168	0.00153493	0.0200042	Gpm6a
ENSMUSG00000083086	6.18562	2.72449	1.32411	2.0576	0.0396281	0.16989	Gm15531
ENSMUSG00000082524	3.79659	2.72348	1.29191	2.10811	0.0350217		Gm6272
ENSMUSG00000072738	1.82407	2.72292	2.1834	1.2471	0.21236		Gm16440
ENSMUSG00000111920	3.57914	2.72186	1.72218	1.58048	0.113998		Gm7370
ENSMUSG00000091165	11.3789	2.71924	1.26032	2.15757	0.0309611	0.145981	Gm17036
ENSMUSG00000041445	49.008	2.71911	0.985913	2.75797	0.0058162	0.0490736	Mmrn2
ENSMUSG00000097912	1.02375	2.7188	4.16379	0.652963	0.51378		6330403N20Rik
ENSMUSG00000094569	4.69092	2.71857	1.4518	1.87256	0.0611292	0.219345	Trbd2
ENSMUSG00000037161	8.7144	2.7181	1.76423	1.54068	0.123395	0.332716	Mgarp
ENSMUSG00000043430	8.53404	2.71729	1.37187	1.98072	0.0476231	0.18979	Psapl1
ENSMUSG00000065544	0.811878	2.71718	5.72072	0.474972	0.634807		Mir32
ENSMUSG00000058925	1.10642	2.71671	2.5726	1.05602	0.290961		1700011I03Rik
ENSMUSG00000101219	5.26001	2.71467	1.11003	2.44557	0.0144622	0.0889225	Gm20302
ENSMUSG00000101156	0.824957	2.71411	4.99677	0.543174	0.58701		Gm29114
ENSMUSG00000026581	1576.57	2.71383	0.921631	2.94459	0.00323383	0.0333192	Sell
ENSMUSG00000081357	2.46745	2.71289	2.54689	1.06518	0.286795		Xlr4e-ps
ENSMUSG00000022491	0.955752	2.71269	5.52203	0.491248	0.623251		Glycam1
ENSMUSG00000097488	1.06411	2.7119	2.90871	0.932337	0.351162		4732487G21Rik
ENSMUSG00000085337	16.3611	2.71135	1.26914	2.13637	0.0326491	0.150776	Gm15964
ENSMUSG00000047216	7.37984	2.7112	5.0593	0.535885	0.592038	0.785252	Cdh19
ENSMUSG00000098048	12.94	2.70698	0.881712	3.07014	0.00213961	0.0251055	Gm8330
ENSMUSG00000100068	1.07774	2.70465	4.76836	0.567208	0.570573		Gm18558
ENSMUSG00000021319	61.0208	2.70464	1.29186	2.0936	0.0362953	0.160776	Sfrp4
ENSMUSG00000036598	0.705855	2.7042	5.85112	0.462168	0.643961		Ccdc113
ENSMUSG00000095350	5.31807	2.70384	1.98869	1.3596	0.173955	0.405424	Gm23284
ENSMUSG00000019997	94.6754	2.70293	0.659297	4.09971	4.1366e-05	0.00158716	Ctgf
ENSMUSG00000048424	0.471258	2.70115	6.46587	0.417755	0.676126		Ranbp3l
ENSMUSG00000099891	6.07742	2.70103	0.996654	2.71009	0.00672641	0.0540325	Gm5575
ENSMUSG00000112759	0.979481	2.70088	4.07474	0.662834	0.507437		AC153516.1
ENSMUSG00000113209	1.33159	2.70047	2.61291	1.03351	0.301365		1700081N11Rik
ENSMUSG00000103408	1.99073	2.70019	2.03261	1.32844	0.184033		Gm37933
ENSMUSG00000075395	3.37072	2.69935	1.75745	1.53595	0.124551		A630010A05Rik
ENSMUSG00000080866	6.30837	2.69916	1.07255	2.51659	0.0118496	0.078239	Gm5687
ENSMUSG00000106751	8.01186	2.69664	1.18546	2.27476	0.0229202	0.12005	Gm42467
ENSMUSG00000114778	3.30263	2.69645	1.54998	1.73967	0.0819179		AC158511.1
ENSMUSG00000041817	9.18625	2.69563	1.41748	1.90171	0.0572096	0.211168	Fam169a
ENSMUSG00000074874	1.25208	2.69338	3.10862	0.866421	0.386259		Ctla2b
ENSMUSG00000081470	2.46294	2.69336	1.68187	1.60141	0.109287		Gm14131
ENSMUSG00000086442	2.25925	2.68835	1.99236	1.34933	0.17723		Gm11722
ENSMUSG00000075224	1.21832	2.68355	3.53917	0.758243	0.448305		Lrrc55
ENSMUSG00000092190	7.82902	2.67886	1.5515	1.72662	0.0842358	0.266119	Gm20470
ENSMUSG00000104419	0.669982	2.67521	6.06521	0.441075	0.659159		2900092O11Rik
ENSMUSG00000109119	0.838386	2.67517	6.08542	0.439603	0.660225		Gm44752
ENSMUSG00000027301	0.720107	2.67347	3.65021	0.732416	0.463915		Oxt
ENSMUSG00000101257	0.455196	2.67278	6.44174	0.414916	0.678203		2310015K22Rik
ENSMUSG00000057945	2.26312	2.67239	1.84118	1.45146	0.146652		Gm17136
ENSMUSG00000097308	0.439405	2.6703	4.7107	0.566859	0.57081		Gm6410
ENSMUSG00000041731	37.0332	2.67005	0.884603	3.01836	0.00254147	0.0282579	Pgm5
ENSMUSG00000113474	1.1592	2.66988	3.37188	0.791809	0.428472		AC126554.2
ENSMUSG00000054556	13.5858	2.6685	1.01794	2.62146	0.00875531	0.0640253	Gm4876
ENSMUSG00000038725	38.1612	2.66842	0.958028	2.78533	0.00534734	0.0463915	Pkhd1l1
ENSMUSG00000094013	5.26038	2.66671	1.1226	2.37548	0.0175264	0.101287	Gm25829
ENSMUSG00000106754	1.01032	2.66463	6.47516	0.411516	0.680694		Gm43101
ENSMUSG00000095197	4.45159	2.66376	1.6945	1.57201	0.115949	0.321222	Ighv1-59
ENSMUSG00000094758	3.37825	2.6627	2.31693	1.14923	0.250459		Trav13d-2
ENSMUSG00000029108	54.2467	2.66164	0.722548	3.68368	0.000229893	0.00535435	Pcdh7
ENSMUSG00000076594	53.9223	2.66142	1.89236	1.40641	0.159603	0.386323	Igkv6-13
ENSMUSG00000081308	16.7943	2.65975	0.77081	3.45059	0.000559361	0.0100024	Gm14480
ENSMUSG00000086057	0.499189	2.65817	6.43319	0.413195	0.679463		Gm15324
ENSMUSG00000095612	82.6194	2.65791	1.09271	2.4324	0.0149992	0.0910345	Ighv5-4
ENSMUSG00000035385	156.241	2.65764	0.645502	4.11717	3.83552e-05	0.00151995	Ccl2
ENSMUSG00000097289	1.6984	2.6576	2.88749	0.920383	0.357373		2010300F17Rik
ENSMUSG00000061535	21.0295	2.65625	1.30513	2.03524	0.0418267	0.175525	C1qtnf7
ENSMUSG00000062778	0.512172	2.65613	6.42873	0.413166	0.679485		Chia1
ENSMUSG00000093598	3.12808	2.65596	1.99947	1.32833	0.184068		A730085K08Rik
ENSMUSG00000113489	1.65227	2.65503	2.52527	1.05138	0.293084		Gm16381
ENSMUSG00000035186	1402.03	2.65383	0.750346	3.53681	0.000404991	0.00794451	Ubd
ENSMUSG00000104621	1.46457	2.65253	3.55911	0.74528	0.456102		Gm43185
ENSMUSG00000065851	0.659566	2.65238	6.46989	0.409958	0.681836		Gm22352
ENSMUSG00000024810	919.426	2.6521	0.850777	3.11727	0.00182534	0.0225427	Il33
ENSMUSG00000111459	0.90336	2.65209	3.26333	0.812695	0.416393		Gm8031
ENSMUSG00000097958	8.25061	2.65184	1.01125	2.62235	0.00873266	0.063942	Gm8492
ENSMUSG00000097705	5.84566	2.648	1.30426	2.03026	0.0423296	0.176778	Gm26740
ENSMUSG00000029337	0.413344	2.64793	6.44788	0.410667	0.681317		Fgf5
ENSMUSG00000064338	0.803986	2.64623	6.42377	0.411943	0.680381		mt-Tv
ENSMUSG00000096615	0.954651	2.6459	6.44534	0.410513	0.68143		Trav11
ENSMUSG00000004885	5.42035	2.6449	2.25738	1.17167	0.24133	0.487732	Crabp2
ENSMUSG00000078765	4.67423	2.64472	1.18087	2.23965	0.0251139	0.127616	U2af1l4
ENSMUSG00000028859	1779.79	2.6437	0.766523	3.44895	0.000562769	0.0100363	Csf3r
ENSMUSG00000057722	32.8756	2.64269	1.03724	2.54782	0.0108399	0.0735707	Lepr
ENSMUSG00000083823	8.80113	2.64202	0.743508	3.55345	0.000380217	0.00764437	Amd-ps1
ENSMUSG00000090307	2.2877	2.63982	3.70151	0.713173	0.475739		1700071M16Rik
ENSMUSG00000082633	38.4585	2.6366	0.553121	4.76677	1.872e-06	0.000176875	Gm15779
ENSMUSG00000115577	1.32038	2.63599	2.82438	0.933298	0.350666		AC132833.2
ENSMUSG00000099112	1.61476	2.63561	2.81669	0.935711	0.349422		Gm27406
ENSMUSG00000083686	0.86851	2.63543	4.20496	0.626743	0.530827		Gm13504
ENSMUSG00000112120	0.817421	2.63434	5.77514	0.456151	0.648281		Gm32255
ENSMUSG00000089965	0.700549	2.63409	6.44626	0.408623	0.682817		Gm16236
ENSMUSG00000083693	19.1201	2.63351	0.658065	4.0019	6.28363e-05	0.00209813	Gm11971
ENSMUSG00000028031	3.49327	2.63256	2.86486	0.918911	0.358142		Dkk2
ENSMUSG00000089702	0.798607	2.63214	4.15042	0.634186	0.525959		Gm16568
ENSMUSG00000093772	8.43557	2.6303	1.13778	2.31178	0.0207898	0.112635	4931403E22Rik
ENSMUSG00000022586	234.477	2.62997	0.660749	3.98029	6.88324e-05	0.00222953	Ly6i
ENSMUSG00000079156	0.525444	2.62815	6.43796	0.408227	0.683107		Smok3b
ENSMUSG00000115247	1.86264	2.62663	2.26749	1.15839	0.246706		AC113125.1
ENSMUSG00000105761	0.70427	2.62591	6.44471	0.407451	0.683676		Gm43787
ENSMUSG00000085304	0.857391	2.62467	3.59089	0.730924	0.464826		Gm12802
ENSMUSG00000083558	0.651075	2.62404	6.08186	0.431453	0.666139		Gm12896
ENSMUSG00000106116	2.20809	2.62318	3.39074	0.773629	0.43915		Gm18830
ENSMUSG00000023033	16.7449	2.62252	0.861613	3.04373	0.00233667	0.0267364	Scn8a
ENSMUSG00000106536	0.764358	2.62215	4.82848	0.54306	0.587089		Gm42508
ENSMUSG00000109697	2.01553	2.62182	3.53049	0.742622	0.457711		Gm34030
ENSMUSG00000092746	2.8163	2.62147	2.82201	0.928939	0.352921		Rn7s6
ENSMUSG00000078632	4.23109	2.61553	1.87143	1.39761	0.162229		Lrrc37a
ENSMUSG00000109270	3.10016	2.61321	1.61831	1.61478	0.106357		Gm10584
ENSMUSG00000108782	0.772686	2.61302	6.40953	0.407678	0.68351		Gm32772
ENSMUSG00000102364	39.9851	2.61187	1.2742	2.04982	0.0403823	0.172054	Ighv8-5
ENSMUSG00000072473	0.500125	2.61172	6.45356	0.404694	0.685702		1700024G13Rik
ENSMUSG00000091712	1.02098	2.60807	2.5697	1.01493	0.310139		Sec14l5
ENSMUSG00000051855	40.0511	2.60764	0.97346	2.67873	0.00739011	0.0574881	Mest
ENSMUSG00000079465	0.874091	2.60645	3.19027	0.816999	0.413929		Col4a3
ENSMUSG00000097138	0.825719	2.60564	4.26485	0.610956	0.541228		Gm26625
ENSMUSG00000076598	184.901	2.60544	0.909711	2.86403	0.00418285	0.0393326	Igkv3-7
ENSMUSG00000049872	9.06225	2.60475	1.49589	1.74127	0.081636	0.26118	Fam26e
ENSMUSG00000065828	1.13588	2.60438	3.10498	0.838774	0.401596		Gm26317
ENSMUSG00000108371	1.01122	2.60293	6.45892	0.402998	0.686949		Gm38832
ENSMUSG00000071317	1.66462	2.6028	4.03382	0.645244	0.518769		Bves
ENSMUSG00000013584	75.5306	2.60197	1.05624	2.46341	0.0137621	0.0859536	Aldh1a2
ENSMUSG00000082322	2.16487	2.60113	1.76079	1.47725	0.139608		Gm9164
ENSMUSG00000089937	7.96378	2.59124	1.03117	2.51292	0.0119738	0.0786254	Gm7281
ENSMUSG00000081289	4.40744	2.59107	1.25123	2.07081	0.0383762	0.166302	Gm14857
ENSMUSG00000096846	1.98286	2.58911	2.25087	1.15027	0.250032		Gm8890
ENSMUSG00000099510	1.16042	2.58733	4.39834	0.588251	0.556364		Gm28501
ENSMUSG00000103011	7.71641	2.58617	1.05028	2.46235	0.0138029	0.0860918	Gm8860
ENSMUSG00000022577	1.06631	2.58591	6.46221	0.400158	0.68904		Ly6h
ENSMUSG00000103162	0.827981	2.58542	5.8775	0.439884	0.660021		Gm38147
ENSMUSG00000087853	0.528824	2.58539	6.42946	0.402116	0.687598		Gm22794
ENSMUSG00000083083	2.16558	2.58473	2.06338	1.25267	0.210326		Gm15382
ENSMUSG00000033777	319.655	2.58245	0.482212	5.35541	8.53607e-08	1.7941e-05	Tlr13
ENSMUSG00000113448	7.58841	2.58189	0.848365	3.04337	0.00233947	0.0267401	Gm7042
ENSMUSG00000094930	256.526	2.58167	1.26129	2.04685	0.0406732	0.172727	Igkv6-25
ENSMUSG00000059173	42.9863	2.58141	1.09695	2.35327	0.0186093	0.105461	Pde1a
ENSMUSG00000083183	0.812924	2.58078	4.06532	0.634827	0.525541		Gm15575
ENSMUSG00000095442	99.4078	2.57955	1.38094	1.86796	0.061767	0.221011	Ighv1-4
ENSMUSG00000102520	0.593984	2.57925	5.27719	0.488754	0.625016		Gm36941
ENSMUSG00000097617	6.88049	2.57801	1.65367	1.55896	0.119006	0.325883	Gm10687
ENSMUSG00000083275	0.706435	2.57761	6.44927	0.399674	0.689396		Gm4993
ENSMUSG00000105421	0.931422	2.57754	4.18197	0.616347	0.537665		5830411K02Rik
ENSMUSG00000074444	0.436157	2.57604	6.44159	0.399907	0.689225		Defa30
ENSMUSG00000094966	1.19726	2.57458	4.40205	0.58486	0.558642		Trav9-2
ENSMUSG00000097998	1.03904	2.57414	3.64033	0.707118	0.479493		Gm27019
ENSMUSG00000086360	2.95854	2.57398	1.91812	1.34193	0.179618		Gm16214
ENSMUSG00000102600	1.75329	2.57397	3.43749	0.748796	0.45398		Gm37266
ENSMUSG00000113059	46.5101	2.57324	0.489465	5.25726	1.46215e-07	2.69847e-05	Gm46344
ENSMUSG00000066478	1.69388	2.57248	2.31668	1.11042	0.266819		Gm5745
ENSMUSG00000098156	14.0132	2.5721	0.690729	3.72375	0.000196282	0.00473991	Gm27023
ENSMUSG00000113951	1.75059	2.57168	2.50366	1.02717	0.304342		Gm2001
ENSMUSG00000080922	7.46993	2.57119	1.27931	2.00983	0.0444489	0.182217	Gm2214
ENSMUSG00000076460	0.9724	2.57105	3.43264	0.749001	0.453857		Mir744
ENSMUSG00000042729	1.83888	2.5704	2.09255	1.22836	0.219313		Wdr74
ENSMUSG00000094164	47.9383	2.56925	1.55781	1.64927	0.0990926	0.293105	Ighv2-3
ENSMUSG00000013091	10.1291	2.56626	1.98403	1.29346	0.195852	0.434007	Tmem190
ENSMUSG00000097763	12.1948	2.56515	1.43629	1.78596	0.0741058	0.246491	Gm26636
ENSMUSG00000087698	2.12739	2.56415	2.34258	1.09458	0.273699		Gm13031
ENSMUSG00000106364	1.11565	2.56391	3.88449	0.660037	0.50923		Gm42994
ENSMUSG00000096805	18.1243	2.56255	1.18104	2.16973	0.030027	0.142727	Ighv9-1
ENSMUSG00000087256	0.757816	2.56104	4.16581	0.614774	0.538704		Gm15990
[truncated: 26,950 more rows]

## Sheet: E. dN colitis vs Wt ut
Reference Number	baseMean	log2FoldChange	lfcSE	stat	p-value	p adj	gene name		NF-κB target genes (overlap)
[truncated: 28,198 more rows]

[truncated: 11 more sheets: F. dN colitis vs dN ut, G. dN colitis vs Wt colitis, H. Wt colitis vs dN ut, I. Wt recovery vs dN ut, J. Wt recovery vs Wt colitis, K. Wt recovery vs dN colitis, L. dN recovery vs Wt ut, M. dN recovery vs dN ut, N. dN recovery vs Wt colitis, O. dN recovery vs dN colitis, P. dN recovery vs Wt recovery]
